# Supplementary material
Source: PubMed Central journal article supplement (PMC2756200)
Supplement: blood-2009-01-200733_1.pdf [file blood-2009-01-200733_1.pdf]

## Functional Annotation Clustering Of Genes Induced By Kit

<http://david.abcc.ncifcrf.gov/summary.jsp>

**1) Genes Upregulated >2 in WT BMMCs**  
pp. 2 - 55

**2) Genes Upregulated >2 in WASP Deficient BMMCs**  
pp. 56 - 106

**3) Genes Upregulated >2 in WT But Not In WASP Deficient BMMCs**  
pp. 107 - 126

**4) Genes Upregulated >2 in WASP Deficient But Not In WT BMMCs**  
pp. 127 - 139

**5) Genes Downregulated <0.5 in WT BMMCs**  
pp. 140 - 184

**6) Genes Downregulated <0.5 in WASP Deficient BMMCs**  
pp. 185 - 238

**7) Genes Downregulated <0.5 in WT But Not In WASP Deficient BMMCs**  
pp. 239 - 254

**8) Genes Downregulated <0.5 in WASP Deficient But Not In WT BMMCs**  
pp. 255 - 278

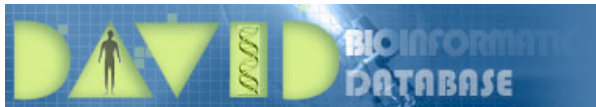

## Functional Annotation Clustering Of Genes Upregulated >2 in WT BMMCs

[Help and Manual](#)

Current Gene List: wt up >2  
1633 DAVID IDs

Options Classification Stringency Medium

Rerun using options

Create Sublist

[Download File](#)

| Annotation Cluster 1     |                 | Enrichment Score: 24.15                                                               |    | G |  | Count | P_Value | Benjamini |
|--------------------------|-----------------|---------------------------------------------------------------------------------------|----|---|--|-------|---------|-----------|
| <input type="checkbox"/> | GOTERM_CC_ALL   | <a href="#">intracellular part</a>                                                    | RT |   |  | 985   | 1.6E-45 | 1.3E-42   |
| <input type="checkbox"/> | GOTERM_CC_ALL   | <a href="#">intracellular</a>                                                         | RT |   |  | 1007  | 5.9E-40 | 2.3E-37   |
| <input type="checkbox"/> | GOTERM_CC_ALL   | <a href="#">intracellular membrane-bound organelle</a>                                | RT |   |  | 777   | 2.2E-35 | 5.8E-33   |
| <input type="checkbox"/> | GOTERM_CC_ALL   | <a href="#">membrane-bound organelle</a>                                              | RT |   |  | 777   | 3.6E-35 | 6.9E-33   |
| <input type="checkbox"/> | GOTERM_CC_ALL   | <a href="#">intracellular organelle</a>                                               | RT |   |  | 840   | 2.5E-33 | 3.8E-31   |
| <input type="checkbox"/> | GOTERM_CC_ALL   | <a href="#">organelle</a>                                                             | RT |   |  | 840   | 3.6E-33 | 4.7E-31   |
| <input type="checkbox"/> | GOTERM_CC_ALL   | <a href="#">nucleus</a>                                                               | RT |   |  | 518   | 1.8E-23 | 2.0E-21   |
| <input type="checkbox"/> | GOTERM_CC_ALL   | <a href="#">cytoplasm</a>                                                             | RT |   |  | 655   | 3.8E-22 | 2.9E-20   |
| <input type="checkbox"/> | SP_PIR_KEYWORDS | <a href="#">nucleus</a>                                                               | RT |   |  | 419   | 1.4E-19 | 3.1E-17   |
| <input type="checkbox"/> | GOTERM_CC_ALL   | <a href="#">cell</a>                                                                  | RT |   |  | 1176  | 2.2E-13 | 9.6E-12   |
| <input type="checkbox"/> | GOTERM_CC_ALL   | <a href="#">cell part</a>                                                             | RT |   |  | 1176  | 2.2E-13 | 9.6E-12   |
| <input type="checkbox"/> | GOTERM_BP_ALL   | <a href="#">nucleobase, nucleoside, nucleotide and nucleic acid metabolic process</a> | RT |   |  | 381   | 9.1E-7  | 1.4E-4    |
| <input type="checkbox"/> | GOTERM_BP_ALL   | <a href="#">biopolymer metabolic process</a>                                          | RT |   |  | 450   | 3.7E-2  | 5.9E-1    |
| Annotation Cluster 2     |                 | Enrichment Score: 15.69                                                               |    | G |  | Count | P_Value | Benjamini |
| <input type="checkbox"/> | SP_PIR_KEYWORDS | <a href="#">cell cycle</a>                                                            | RT |   |  | 104   | 3.2E-26 | 1.4E-23   |
| <input type="checkbox"/> | SP_PIR_KEYWORDS | <a href="#">cell division</a>                                                         | RT |   |  | 66    | 9.0E-22 | 2.6E-19   |
| <input type="checkbox"/> | GOTERM_BP_ALL   | <a href="#">cell cycle</a>                                                            | RT |   |  | 152   | 9.3E-22 | 4.8E-18   |
| <input type="checkbox"/> | GOTERM_BP_ALL   | <a href="#">cell division</a>                                                         | RT |   |  | 76    | 4.4E-21 | 1.1E-17   |
| <input type="checkbox"/> | SP_PIR_KEYWORDS | <a href="#">mitosis</a>                                                               | RT |   |  | 48    | 1.4E-18 | 2.4E-16   |
| <input type="checkbox"/> | GOTERM_BP_ALL   | <a href="#">cell cycle process</a>                                                    | RT |   |  | 119   | 5.1E-16 | 7.2E-13   |
| <input type="checkbox"/> | GOTERM_BP_ALL   | <a href="#">cell cycle phase</a>                                                      | RT |   |  | 75    | 1.1E-15 | 1.1E-12   |
| <input type="checkbox"/> | GOTERM_BP_ALL   | <a href="#">M phase</a>                                                               | RT |   |  | 66    | 6.5E-15 | 5.5E-12   |
| <input type="checkbox"/> | GOTERM_BP_ALL   | <a href="#">mitotic cell cycle</a>                                                    | RT |   |  | 66    | 1.2E-14 | 8.9E-12   |
| <input type="checkbox"/> | GOTERM_BP_ALL   | <a href="#">mitosis</a>                                                               | RT |   |  | 54    | 6.5E-14 | 4.2E-11   |
| <input type="checkbox"/> | GOTERM_BP_ALL   | <a href="#">M phase of mitotic cell cycle</a>                                         | RT |   |  | 54    | 8.3E-14 | 4.8E-11   |
| <input type="checkbox"/> | GOTERM_BP_ALL   | <a href="#">regulation of progression through cell cycle</a>                          | RT |   |  | 68    | 1.3E-7  | 2.3E-5    |
| <input type="checkbox"/> | GOTERM_BP_ALL   | <a href="#">regulation of cell cycle</a>                                              | RT |   |  | 68    | 1.8E-7  | 2.9E-5    |
| Annotation Cluster 3     |                 | Enrichment Score: 14.14                                                               |    | G |  | Count | P_Value | Benjamini |
| <input type="checkbox"/> | GOTERM_CC_ALL   | <a href="#">chromosome</a>                                                            | RT |   |  | 79    | 4.0E-16 | 3.1E-14   |
| <input type="checkbox"/> | GOTERM_CC_ALL   | <a href="#">chromosomal part</a>                                                      | RT |   |  | 70    | 9.2E-15 | 5.9E-13   |
| <input type="checkbox"/> | GOTERM_CC_ALL   | <a href="#">chromosome, pericentric region</a>                                        | RT |   |  | 30    | 1.1E-13 | 5.5E-12   |
| Annotation Cluster 4     |                 | Enrichment Score: 13.07                                                               |    | G |  | Count | P_Value | Benjamini |
| <input type="checkbox"/> | GOTERM_CC_ALL   | <a href="#">intracellular organelle part</a>                                          | RT |   |  | 358   | 6.7E-23 | 6.5E-21   |
| <input type="checkbox"/> | GOTERM_CC_ALL   | <a href="#">organelle part</a>                                                        | RT |   |  | 359   | 7.6E-23 | 6.5E-21   |
| <input type="checkbox"/> | GOTERM_CC_ALL   | <a href="#">non-membrane-bound organelle</a>                                          | RT |   |  | 219   | 4.4E-14 | 2.6E-12   |
| <input type="checkbox"/> | GOTERM_CC_ALL   | <a href="#">intracellular non-membrane-bound organelle</a>                            | RT |   |  | 219   | 4.4E-14 | 2.6E-12   |
| <input type="checkbox"/> | GOTERM_CC_ALL   | <a href="#">macromolecular complex</a>                                                | RT |   |  | 284   | 1.7E-13 | 8.3E-12   |

| <input type="checkbox"/> | Category        | Term                                                                                               | RT | Bar                     | Count | P_Value | Benjamini |
|--------------------------|-----------------|----------------------------------------------------------------------------------------------------|----|-------------------------|-------|---------|-----------|
| <input type="checkbox"/> | GOTERM_CC_ALL   | <a href="#">cytoskeletal part</a>                                                                  | RT |                         | 82    | 4.4E-6  | 9.9E-5    |
| <input type="checkbox"/> | GOTERM_CC_ALL   | <a href="#">cytoskeleton</a>                                                                       | RT |                         | 104   | 4.3E-3  | 5.6E-2    |
|                          |                 | Annotation Cluster 5                                                                               |    | Enrichment Score: 12.68 |       |         |           |
| <input type="checkbox"/> | GOTERM_MF_ALL   | <a href="#">nucleotide binding</a>                                                                 | RT |                         | 290   | 2.6E-18 | 7.0E-15   |
| <input type="checkbox"/> | SP_PIR_KEYWORDS | <a href="#">nucleotide-binding</a>                                                                 | RT |                         | 211   | 2.1E-16 | 2.4E-14   |
| <input type="checkbox"/> | SP_PIR_KEYWORDS | <a href="#">atp-binding</a>                                                                        | RT |                         | 171   | 1.1E-14 | 9.1E-13   |
| <input type="checkbox"/> | GOTERM_MF_ALL   | <a href="#">ribonucleotide binding</a>                                                             | RT |                         | 242   | 2.9E-14 | 2.6E-11   |
| <input type="checkbox"/> | GOTERM_MF_ALL   | <a href="#">purine ribonucleotide binding</a>                                                      | RT |                         | 242   | 2.9E-14 | 2.6E-11   |
| <input type="checkbox"/> | GOTERM_MF_ALL   | <a href="#">purine nucleotide binding</a>                                                          | RT |                         | 247   | 1.2E-13 | 6.5E-11   |
| <input type="checkbox"/> | GOTERM_MF_ALL   | <a href="#">ATP binding</a>                                                                        | RT |                         | 201   | 5.2E-13 | 2.3E-10   |
| <input type="checkbox"/> | GOTERM_MF_ALL   | <a href="#">adenyl ribonucleotide binding</a>                                                      | RT |                         | 202   | 9.0E-13 | 3.4E-10   |
| <input type="checkbox"/> | GOTERM_MF_ALL   | <a href="#">adenyl nucleotide binding</a>                                                          | RT |                         | 207   | 4.2E-12 | 1.4E-9    |
| <input type="checkbox"/> | UP_SEQ_FEATURE  | nucleotide phosphate-binding region:ATP                                                            | RT |                         | 91    | 1.5E-4  | 2.0E-1    |
|                          |                 | Annotation Cluster 6                                                                               |    | Enrichment Score: 11.27 |       |         |           |
| <input type="checkbox"/> | GOTERM_BP_ALL   | <a href="#">RNA processing</a>                                                                     | RT |                         | 84    | 2.2E-13 | 1.1E-10   |
| <input type="checkbox"/> | SP_PIR_KEYWORDS | <a href="#">rna-binding</a>                                                                        | RT |                         | 81    | 3.2E-12 | 2.3E-10   |
| <input type="checkbox"/> | GOTERM_MF_ALL   | <a href="#">RNA binding</a>                                                                        | RT |                         | 103   | 2.2E-10 | 4.5E-8    |
|                          |                 | Annotation Cluster 7                                                                               |    | Enrichment Score: 8.51  |       |         |           |
| <input type="checkbox"/> | SP_PIR_KEYWORDS | <a href="#">chaperone</a>                                                                          | RT |                         | 38    | 1.9E-11 | 1.3E-9    |
| <input type="checkbox"/> | GOTERM_BP_ALL   | <a href="#">protein folding</a>                                                                    | RT |                         | 51    | 4.4E-10 | 1.3E-7    |
| <input type="checkbox"/> | GOTERM_MF_ALL   | <a href="#">unfolded protein binding</a>                                                           | RT |                         | 22    | 3.7E-6  | 6.1E-4    |
|                          |                 | Annotation Cluster 8                                                                               |    | Enrichment Score: 7.6   |       |         |           |
| <input type="checkbox"/> | GOTERM_BP_ALL   | <a href="#">cellular metabolic process</a>                                                         | RT |                         | 748   | 9.8E-12 | 3.6E-9    |
| <input type="checkbox"/> | GOTERM_BP_ALL   | <a href="#">primary metabolic process</a>                                                          | RT |                         | 747   | 1.8E-11 | 6.3E-9    |
| <input type="checkbox"/> | GOTERM_BP_ALL   | <a href="#">metabolic process</a>                                                                  | RT |                         | 809   | 1.6E-10 | 4.8E-8    |
| <input type="checkbox"/> | GOTERM_BP_ALL   | <a href="#">cellular process</a>                                                                   | RT |                         | 1053  | 6.9E-10 | 1.8E-7    |
| <input type="checkbox"/> | GOTERM_BP_ALL   | <a href="#">nucleobase, nucleoside, nucleotide and nucleic acid metabolic process</a>              | RT |                         | 381   | 9.1E-7  | 1.4E-4    |
| <input type="checkbox"/> | GOTERM_BP_ALL   | <a href="#">macromolecule metabolic process</a>                                                    | RT |                         | 628   | 9.7E-6  | 1.1E-3    |
| <input type="checkbox"/> | GOTERM_BP_ALL   | <a href="#">biopolymer metabolic process</a>                                                       | RT |                         | 450   | 3.7E-2  | 5.9E-1    |
|                          |                 | Annotation Cluster 9                                                                               |    | Enrichment Score: 7.48  |       |         |           |
| <input type="checkbox"/> | GOTERM_MF_ALL   | <a href="#">nucleoside-triphosphatase activity</a>                                                 | RT |                         | 97    | 1.9E-11 | 5.7E-9    |
| <input type="checkbox"/> | GOTERM_MF_ALL   | <a href="#">pyrophosphatase activity</a>                                                           | RT |                         | 100   | 2.1E-11 | 5.7E-9    |
| <input type="checkbox"/> | GOTERM_MF_ALL   | <a href="#">hydrolase activity, acting on acid anhydrides, in phosphorus-containing anhydrides</a> | RT |                         | 100   | 3.7E-11 | 9.0E-9    |
| <input type="checkbox"/> | GOTERM_MF_ALL   | <a href="#">hydrolase activity, acting on acid anhydrides</a>                                      | RT |                         | 100   | 5.1E-11 | 1.1E-8    |
| <input type="checkbox"/> | GOTERM_MF_ALL   | <a href="#">ATPase activity, coupled</a>                                                           | RT |                         | 44    | 2.8E-4  | 2.8E-2    |
| <input type="checkbox"/> | GOTERM_MF_ALL   | <a href="#">hydrolase activity</a>                                                                 | RT |                         | 240   | 2.9E-4  | 2.6E-2    |
| <input type="checkbox"/> | GOTERM_MF_ALL   | <a href="#">ATPase activity</a>                                                                    | RT |                         | 48    | 6.7E-4  | 5.0E-2    |
|                          |                 | Annotation Cluster 10                                                                              |    | Enrichment Score: 6.55  |       |         |           |
| <input type="checkbox"/> | GOTERM_BP_ALL   | <a href="#">biosynthetic process</a>                                                               | RT |                         | 196   | 2.8E-13 | 1.3E-10   |
| <input type="checkbox"/> | GOTERM_BP_ALL   | <a href="#">cellular biosynthetic process</a>                                                      | RT |                         | 142   | 5.7E-9  | 1.2E-6    |
| <input type="checkbox"/> | SP_PIR_KEYWORDS | <a href="#">protein biosynthesis</a>                                                               | RT |                         | 33    | 4.4E-7  | 1.7E-5    |
| <input type="checkbox"/> | GOTERM_BP_ALL   | <a href="#">translation</a>                                                                        | RT |                         | 65    | 7.2E-4  | 3.7E-2    |
| <input type="checkbox"/> | GOTERM_BP_ALL   | <a href="#">macromolecule biosynthetic process</a>                                                 | RT |                         | 88    | 3.6E-3  | 1.4E-1    |
|                          |                 | Annotation Cluster 11                                                                              |    | Enrichment Score: 6.34  |       |         |           |
| <input type="checkbox"/> | GOTERM_BP_ALL   | <a href="#">RNA processing</a>                                                                     | RT |                         | 84    | 2.2E-13 | 1.1E-10   |
| <input type="checkbox"/> | SP_PIR_KEYWORDS | <a href="#">mrna splicing</a>                                                                      | RT |                         | 40    | 2.8E-9  | 1.4E-7    |
| <input type="checkbox"/> | GOTERM_CC_ALL   | <a href="#">ribonucleoprotein complex</a>                                                          | RT |                         | 76    | 1.3E-8  | 4.6E-7    |
| <input type="checkbox"/> | SP_PIR_KEYWORDS | <a href="#">mrna processing</a>                                                                    | RT |                         | 43    | 1.3E-7  | 5.3E-6    |
| <input type="checkbox"/> | GOTERM_BP_ALL   | <a href="#">RNA splicing</a>                                                                       | RT |                         | 42    | 1.6E-7  | 2.7E-5    |

|                          |                 |                                                                                                      |          |  |       |         |           |
|--------------------------|-----------------|------------------------------------------------------------------------------------------------------|----------|--|-------|---------|-----------|
| <input type="checkbox"/> | GOTERM_BP_ALL   | <a href="#">mRNA metabolic process</a>                                                               | RT       |  | 53    | 3.0E-7  | 4.7E-5    |
| <input type="checkbox"/> | GOTERM_BP_ALL   | <a href="#">mRNA processing</a>                                                                      | RT       |  | 46    | 2.7E-6  | 3.6E-4    |
| <input type="checkbox"/> | SP_PIR_KEYWORDS | <a href="#">spliceosome</a>                                                                          | RT       |  | 25    | 1.1E-5  | 3.3E-4    |
| <input type="checkbox"/> | GOTERM_CC_ALL   | <a href="#">spliceosome</a>                                                                          | RT       |  | 29    | 1.5E-5  | 3.1E-4    |
| <input type="checkbox"/> | GOTERM_BP_ALL   | <a href="#">RNA splicing, via transesterification reactions</a>                                      | RT       |  | 16    | 1.4E-4  | 1.0E-2    |
| <input type="checkbox"/> | GOTERM_BP_ALL   | <a href="#">RNA splicing, via transesterification reactions with bulged adenosine as nucleophile</a> | RT       |  | 16    | 1.4E-4  | 1.0E-2    |
| <input type="checkbox"/> | GOTERM_BP_ALL   | <a href="#">nuclear mRNA splicing, via spliceosome</a>                                               | RT       |  | 16    | 1.4E-4  | 1.0E-2    |
| Annotation Cluster 12    |                 | Enrichment Score: 6.3                                                                                | <b>G</b> |  | Count | P_Value | Benjamini |
| <input type="checkbox"/> | SMART           | <a href="#">RRM</a>                                                                                  | RT       |  | 39    | 4.3E-9  | 2.6E-6    |
| <input type="checkbox"/> | GOTERM_BP_ALL   | <a href="#">mRNA metabolic process</a>                                                               | RT       |  | 53    | 3.0E-7  | 4.7E-5    |
| <input type="checkbox"/> | INTERPRO        | <a href="#">RNA recognition motif, RNP-1</a>                                                         | RT       |  | 36    | 3.8E-7  | 7.4E-4    |
| <input type="checkbox"/> | INTERPRO        | <a href="#">Nucleotide-binding, alpha-beta plait</a>                                                 | RT       |  | 33    | 7.8E-6  | 1.1E-2    |
| <input type="checkbox"/> | UP_SEQ_FEATURE  | domain:RRM                                                                                           | RT       |  | 18    | 8.1E-6  | 1.4E-2    |
| Annotation Cluster 13    |                 | Enrichment Score: 6.01                                                                               | <b>G</b> |  | Count | P_Value | Benjamini |
| <input type="checkbox"/> | KEGG_PATHWAY    | <a href="#">Biosynthesis of steroids</a>                                                             | RT       |  | 20    | 1.9E-14 | 2.0E-12   |
| <input type="checkbox"/> | SP_PIR_KEYWORDS | <a href="#">lipid synthesis</a>                                                                      | RT       |  | 32    | 1.4E-12 | 1.1E-10   |
| <input type="checkbox"/> | GOTERM_BP_ALL   | <a href="#">sterol biosynthetic process</a>                                                          | RT       |  | 20    | 2.8E-12 | 1.2E-9    |
| <input type="checkbox"/> | GOTERM_BP_ALL   | <a href="#">cholesterol biosynthetic process</a>                                                     | RT       |  | 16    | 4.8E-10 | 1.3E-7    |
| <input type="checkbox"/> | SP_PIR_KEYWORDS | <a href="#">sterol biosynthesis</a>                                                                  | RT       |  | 14    | 3.3E-9  | 1.6E-7    |
| <input type="checkbox"/> | GOTERM_BP_ALL   | <a href="#">lipid biosynthetic process</a>                                                           | RT       |  | 53    | 4.3E-8  | 7.7E-6    |
| <input type="checkbox"/> | SP_PIR_KEYWORDS | <a href="#">steroid biosynthesis</a>                                                                 | RT       |  | 16    | 5.7E-8  | 2.5E-6    |
| <input type="checkbox"/> | SP_PIR_KEYWORDS | <a href="#">cholesterol biosynthesis</a>                                                             | RT       |  | 11    | 8.3E-8  | 3.4E-6    |
| <input type="checkbox"/> | GOTERM_BP_ALL   | <a href="#">steroid biosynthetic process</a>                                                         | RT       |  | 23    | 1.1E-6  | 1.5E-4    |
| <input type="checkbox"/> | GOTERM_BP_ALL   | <a href="#">sterol metabolic process</a>                                                             | RT       |  | 23    | 1.7E-6  | 2.4E-4    |
| <input type="checkbox"/> | GOTERM_BP_ALL   | <a href="#">cholesterol metabolic process</a>                                                        | RT       |  | 19    | 7.1E-5  | 5.7E-3    |
| <input type="checkbox"/> | GOTERM_BP_ALL   | <a href="#">alcohol metabolic process</a>                                                            | RT       |  | 48    | 8.5E-5  | 6.6E-3    |
| <input type="checkbox"/> | GOTERM_BP_ALL   | <a href="#">isoprenoid biosynthetic process</a>                                                      | RT       |  | 9     | 1.7E-4  | 1.2E-2    |
| <input type="checkbox"/> | GOTERM_BP_ALL   | <a href="#">steroid metabolic process</a>                                                            | RT       |  | 27    | 2.5E-3  | 1.0E-1    |
| <input type="checkbox"/> | GOTERM_BP_ALL   | <a href="#">isoprenoid metabolic process</a>                                                         | RT       |  | 9     | 9.8E-3  | 2.8E-1    |
| <input type="checkbox"/> | SP_PIR_KEYWORDS | <a href="#">Isoprene biosynthesis</a>                                                                | RT       |  | 4     | 3.1E-2  | 2.8E-1    |
| <input type="checkbox"/> | GOTERM_BP_ALL   | <a href="#">cellular lipid metabolic process</a>                                                     | RT       |  | 63    | 7.4E-2  | 7.6E-1    |
| <input type="checkbox"/> | GOTERM_BP_ALL   | <a href="#">lipid metabolic process</a>                                                              | RT       |  | 67    | 2.2E-1  | 9.7E-1    |
| Annotation Cluster 14    |                 | Enrichment Score: 5.86                                                                               | <b>G</b> |  | Count | P_Value | Benjamini |
| <input type="checkbox"/> | GOTERM_BP_ALL   | <a href="#">ribonucleoprotein complex biogenesis and assembly</a>                                    | RT       |  | 53    | 2.3E-11 | 7.5E-9    |
| <input type="checkbox"/> | GOTERM_BP_ALL   | <a href="#">ribosome biogenesis and assembly</a>                                                     | RT       |  | 30    | 3.5E-6  | 4.4E-4    |
| <input type="checkbox"/> | GOTERM_BP_ALL   | <a href="#">rRNA processing</a>                                                                      | RT       |  | 18    | 1.9E-5  | 2.1E-3    |
| <input type="checkbox"/> | GOTERM_BP_ALL   | <a href="#">rRNA metabolic process</a>                                                               | RT       |  | 18    | 2.4E-5  | 2.5E-3    |
| <input type="checkbox"/> | SP_PIR_KEYWORDS | <a href="#">rrna processing</a>                                                                      | RT       |  | 14    | 1.4E-4  | 3.3E-3    |
| Annotation Cluster 15    |                 | Enrichment Score: 5.63                                                                               | <b>G</b> |  | Count | P_Value | Benjamini |
| <input type="checkbox"/> | SP_PIR_KEYWORDS | <a href="#">cell cycle control</a>                                                                   | RT       |  | 16    | 3.6E-10 | 2.1E-8    |
| <input type="checkbox"/> | GOTERM_MF_ALL   | <a href="#">cyclin-dependent protein kinase regulator activity</a>                                   | RT       |  | 14    | 1.5E-8  | 2.8E-6    |
| <input type="checkbox"/> | PIRSUPERFAMILY  | PIRSF001771:cyclin, A/B/D/E types                                                                    | RT       |  | 10    | 7.6E-8  | 2.4E-4    |
| <input type="checkbox"/> | INTERPRO        | <a href="#">Cyclin, C-terminal</a>                                                                   | RT       |  | 11    | 1.4E-7  | 8.0E-4    |
| <input type="checkbox"/> | INTERPRO        | <a href="#">Cyclin, A/B/D/E</a>                                                                      | RT       |  | 9     | 1.4E-7  | 4.1E-4    |
| <input type="checkbox"/> | SMART           | <a href="#">CYCLIN</a>                                                                               | RT       |  | 14    | 3.6E-7  | 7.2E-5    |
| <input type="checkbox"/> | INTERPRO        | <a href="#">Cyclin, N-terminal</a>                                                                   | RT       |  | 12    | 8.5E-6  | 9.9E-3    |
| <input type="checkbox"/> | INTERPRO        | <a href="#">Cyclin</a>                                                                               | RT       |  | 13    | 9.2E-6  | 8.9E-3    |

| <input type="checkbox"/> | SP_PIR_KEYWORDS       | <a href="#">cyclin</a>                                                        | <a href="#">RT</a> |  |  |  | 19    | 1.9E-5  | 5.3E-4    |
|--------------------------|-----------------------|-------------------------------------------------------------------------------|--------------------|--|--|--|-------|---------|-----------|
| <input type="checkbox"/> | KEGG_PATHWAY          | <a href="#">p53 signaling pathway</a>                                         | <a href="#">RT</a> |  |  |  | 21    | 2.3E-5  | 9.5E-4    |
| <input type="checkbox"/> | GOTERM_MF_ALL         | <a href="#">protein kinase regulator activity</a>                             | <a href="#">RT</a> |  |  |  | 19    | 3.4E-5  | 5.4E-3    |
| <input type="checkbox"/> | INTERPRO              | <a href="#">Cyclin-related</a>                                                | <a href="#">RT</a> |  |  |  | 12    | 7.7E-5  | 4.4E-2    |
| <input type="checkbox"/> | GOTERM_MF_ALL         | <a href="#">kinase regulator activity</a>                                     | <a href="#">RT</a> |  |  |  | 20    | 2.0E-4  | 2.3E-2    |
| <input type="checkbox"/> | INTERPRO              | <a href="#">Cyclin D</a>                                                      | <a href="#">RT</a> |  |  |  | 4     | 2.6E-3  | 5.6E-1    |
|                          | Annotation Cluster 16 | Enrichment Score: 5.33                                                        | <b>G</b>           |  |  |  | Count | P_Value | Benjamini |
| <input type="checkbox"/> | SMART                 | <a href="#">AAA</a>                                                           | <a href="#">RT</a> |  |  |  | 24    | 1.0E-7  | 3.1E-5    |
| <input type="checkbox"/> | INTERPRO              | <a href="#">AAA ATPase, core</a>                                              | <a href="#">RT</a> |  |  |  | 14    | 3.2E-5  | 2.3E-2    |
| <input type="checkbox"/> | INTERPRO              | <a href="#">AAA+ ATPase, core</a>                                             | <a href="#">RT</a> |  |  |  | 19    | 3.2E-5  | 2.1E-2    |
|                          | Annotation Cluster 17 | Enrichment Score: 4.94                                                        | <b>G</b>           |  |  |  | Count | P_Value | Benjamini |
| <input type="checkbox"/> | UP_SEQ_FEATURE        | repeat:WD 5                                                                   | <a href="#">RT</a> |  |  |  | 31    | 9.0E-7  | 1.3E-2    |
| <input type="checkbox"/> | UP_SEQ_FEATURE        | repeat:WD 4                                                                   | <a href="#">RT</a> |  |  |  | 32    | 1.4E-6  | 9.7E-3    |
| <input type="checkbox"/> | UP_SEQ_FEATURE        | repeat:WD 3                                                                   | <a href="#">RT</a> |  |  |  | 32    | 4.9E-6  | 2.3E-2    |
| <input type="checkbox"/> | UP_SEQ_FEATURE        | repeat:WD 6                                                                   | <a href="#">RT</a> |  |  |  | 25    | 5.3E-6  | 1.9E-2    |
| <input type="checkbox"/> | UP_SEQ_FEATURE        | repeat:WD 2                                                                   | <a href="#">RT</a> |  |  |  | 32    | 6.9E-6  | 1.9E-2    |
| <input type="checkbox"/> | UP_SEQ_FEATURE        | repeat:WD 1                                                                   | <a href="#">RT</a> |  |  |  | 32    | 6.9E-6  | 1.9E-2    |
| <input type="checkbox"/> | SMART                 | <a href="#">WD40</a>                                                          | <a href="#">RT</a> |  |  |  | 36    | 1.1E-5  | 1.3E-3    |
| <input type="checkbox"/> | UP_SEQ_FEATURE        | repeat:WD 7                                                                   | <a href="#">RT</a> |  |  |  | 18    | 6.8E-5  | 1.0E-1    |
| <input type="checkbox"/> | INTERPRO              | <a href="#">WD40 repeat</a>                                                   | <a href="#">RT</a> |  |  |  | 35    | 1.9E-4  | 8.7E-2    |
| <input type="checkbox"/> | SP_PIR_KEYWORDS       | <a href="#">wd repeat</a>                                                     | <a href="#">RT</a> |  |  |  | 40    | 1.9E-4  | 4.2E-3    |
|                          | Annotation Cluster 18 | Enrichment Score: 4.83                                                        | <b>G</b>           |  |  |  | Count | P_Value | Benjamini |
| <input type="checkbox"/> | GOTERM_CC_ALL         | <a href="#">nuclear membrane part</a>                                         | <a href="#">RT</a> |  |  |  | 22    | 1.7E-7  | 5.5E-6    |
| <input type="checkbox"/> | GOTERM_CC_ALL         | <a href="#">nuclear membrane</a>                                              | <a href="#">RT</a> |  |  |  | 22    | 4.0E-7  | 1.2E-5    |
| <input type="checkbox"/> | SP_PIR_KEYWORDS       | <a href="#">mrna transport</a>                                                | <a href="#">RT</a> |  |  |  | 16    | 2.4E-6  | 7.8E-5    |
| <input type="checkbox"/> | GOTERM_CC_ALL         | <a href="#">nuclear pore</a>                                                  | <a href="#">RT</a> |  |  |  | 18    | 3.0E-6  | 7.3E-5    |
| <input type="checkbox"/> | GOTERM_CC_ALL         | <a href="#">pore complex</a>                                                  | <a href="#">RT</a> |  |  |  | 19    | 3.4E-6  | 7.9E-5    |
| <input type="checkbox"/> | GOTERM_BP_ALL         | <a href="#">mRNA transport</a>                                                | <a href="#">RT</a> |  |  |  | 18    | 8.8E-6  | 1.1E-3    |
| <input type="checkbox"/> | SP_PIR_KEYWORDS       | <a href="#">translocation</a>                                                 | <a href="#">RT</a> |  |  |  | 18    | 8.8E-6  | 2.7E-4    |
| <input type="checkbox"/> | GOTERM_BP_ALL         | <a href="#">nucleobase, nucleoside, nucleotide and nucleic acid transport</a> | <a href="#">RT</a> |  |  |  | 19    | 2.0E-5  | 2.1E-3    |
| <input type="checkbox"/> | GOTERM_CC_ALL         | <a href="#">nuclear envelope</a>                                              | <a href="#">RT</a> |  |  |  | 28    | 2.1E-5  | 4.1E-4    |
| <input type="checkbox"/> | GOTERM_BP_ALL         | <a href="#">establishment of RNA localization</a>                             | <a href="#">RT</a> |  |  |  | 18    | 3.0E-5  | 2.9E-3    |
| <input type="checkbox"/> | GOTERM_BP_ALL         | <a href="#">RNA transport</a>                                                 | <a href="#">RT</a> |  |  |  | 18    | 3.0E-5  | 2.9E-3    |
| <input type="checkbox"/> | GOTERM_BP_ALL         | <a href="#">nucleic acid transport</a>                                        | <a href="#">RT</a> |  |  |  | 18    | 3.0E-5  | 2.9E-3    |
| <input type="checkbox"/> | GOTERM_BP_ALL         | <a href="#">RNA localization</a>                                              | <a href="#">RT</a> |  |  |  | 18    | 3.8E-5  | 3.5E-3    |
| <input type="checkbox"/> | GOTERM_CC_ALL         | <a href="#">endomembrane system</a>                                           | <a href="#">RT</a> |  |  |  | 58    | 2.5E-4  | 4.4E-3    |
| <input type="checkbox"/> | GOTERM_BP_ALL         | <a href="#">intracellular protein transport across a membrane</a>             | <a href="#">RT</a> |  |  |  | 15    | 3.5E-4  | 2.1E-2    |
| <input type="checkbox"/> | SP_PIR_KEYWORDS       | <a href="#">nuclear pore complex</a>                                          | <a href="#">RT</a> |  |  |  | 9     | 9.7E-4  | 1.8E-2    |
|                          | Annotation Cluster 19 | Enrichment Score: 4.14                                                        | <b>G</b>           |  |  |  | Count | P_Value | Benjamini |
| <input type="checkbox"/> | SP_PIR_KEYWORDS       | <a href="#">protein biosynthesis</a>                                          | <a href="#">RT</a> |  |  |  | 33    | 4.4E-7  | 1.7E-5    |
| <input type="checkbox"/> | SP_PIR_KEYWORDS       | <a href="#">aminoacyl-tRNA synthetase</a>                                     | <a href="#">RT</a> |  |  |  | 16    | 8.1E-7  | 2.8E-5    |
| <input type="checkbox"/> | GOTERM_BP_ALL         | <a href="#">tRNA metabolic process</a>                                        | <a href="#">RT</a> |  |  |  | 28    | 2.9E-6  | 3.7E-4    |
| <input type="checkbox"/> | KEGG_PATHWAY          | <a href="#">Aminoacyl-tRNA biosynthesis</a>                                   | <a href="#">RT</a> |  |  |  | 14    | 2.9E-5  | 1.0E-3    |
| <input type="checkbox"/> | SP_PIR_KEYWORDS       | <a href="#">ligase</a>                                                        | <a href="#">RT</a> |  |  |  | 43    | 7.7E-5  | 1.9E-3    |
| <input type="checkbox"/> | GOTERM_MF_ALL         | <a href="#">ligase activity, forming carbon-oxygen bonds</a>                  | <a href="#">RT</a> |  |  |  | 16    | 3.1E-4  | 2.7E-2    |
| <input type="checkbox"/> | GOTERM_MF_ALL         | <a href="#">aminoacyl-tRNA ligase activity</a>                                | <a href="#">RT</a> |  |  |  | 16    | 3.1E-4  | 2.7E-2    |
| <input type="checkbox"/> | GOTERM_MF_ALL         | <a href="#">ligase activity, forming aminoacyl-tRNA and related compounds</a> | <a href="#">RT</a> |  |  |  | 16    | 3.1E-4  | 2.7E-2    |
| <input type="checkbox"/> | GOTERM_BP_ALL         | <a href="#">amino acid activation</a>                                         | <a href="#">RT</a> |  |  |  | 15    | 6.3E-4  | 3.4E-2    |

|                          |                       |                                                                |                    |  | Count | P_Value | Benjamini |
|--------------------------|-----------------------|----------------------------------------------------------------|--------------------|--|-------|---------|-----------|
| <input type="checkbox"/> | GOTERM_BP_ALL         | <a href="#">tRNA aminoacylation for protein translation</a>    | <a href="#">RT</a> |  | 15    | 6.3E-4  | 3.4E-2    |
| <input type="checkbox"/> | GOTERM_BP_ALL         | <a href="#">tRNA aminoacylation</a>                            | <a href="#">RT</a> |  | 15    | 6.3E-4  | 3.4E-2    |
| <input type="checkbox"/> | GOTERM_BP_ALL         | <a href="#">amino acid metabolic process</a>                   | <a href="#">RT</a> |  | 41    | 1.2E-3  | 5.8E-2    |
|                          | Annotation Cluster 20 | Enrichment Score: 3.92                                         | <b>G</b>           |  |       |         |           |
| <input type="checkbox"/> | GOTERM_BP_ALL         | <a href="#">intracellular transport</a>                        | <a href="#">RT</a> |  | 114   | 1.0E-9  | 2.6E-7    |
| <input type="checkbox"/> | GOTERM_BP_ALL         | <a href="#">cellular localization</a>                          | <a href="#">RT</a> |  | 133   | 1.5E-8  | 3.1E-6    |
| <input type="checkbox"/> | GOTERM_BP_ALL         | <a href="#">establishment of cellular localization</a>         | <a href="#">RT</a> |  | 129   | 4.0E-8  | 7.6E-6    |
| <input type="checkbox"/> | GOTERM_BP_ALL         | <a href="#">cellular component organization and biogenesis</a> | <a href="#">RT</a> |  | 302   | 9.8E-7  | 1.5E-4    |
| <input type="checkbox"/> | GOTERM_BP_ALL         | <a href="#">macromolecule localization</a>                     | <a href="#">RT</a> |  | 114   | 1.9E-5  | 2.1E-3    |
| <input type="checkbox"/> | GOTERM_BP_ALL         | <a href="#">intracellular protein transport</a>                | <a href="#">RT</a> |  | 66    | 1.2E-4  | 8.9E-3    |
| <input type="checkbox"/> | GOTERM_BP_ALL         | <a href="#">protein localization</a>                           | <a href="#">RT</a> |  | 106   | 1.5E-4  | 1.0E-2    |
| <input type="checkbox"/> | GOTERM_BP_ALL         | <a href="#">establishment of protein localization</a>          | <a href="#">RT</a> |  | 97    | 3.8E-4  | 2.3E-2    |
| <input type="checkbox"/> | SP_PIR_KEYWORDS       | <a href="#">protein transport</a>                              | <a href="#">RT</a> |  | 58    | 4.2E-4  | 8.5E-3    |
| <input type="checkbox"/> | GOTERM_BP_ALL         | <a href="#">protein targeting</a>                              | <a href="#">RT</a> |  | 40    | 4.8E-4  | 2.7E-2    |
| <input type="checkbox"/> | GOTERM_MF_ALL         | <a href="#">protein transporter activity</a>                   | <a href="#">RT</a> |  | 28    | 1.0E-3  | 7.1E-2    |
| <input type="checkbox"/> | GOTERM_BP_ALL         | <a href="#">protein transport</a>                              | <a href="#">RT</a> |  | 89    | 1.6E-3  | 7.3E-2    |
| <input type="checkbox"/> | GOTERM_BP_ALL         | <a href="#">localization</a>                                   | <a href="#">RT</a> |  | 294   | 7.5E-2  | 7.7E-1    |
| <input type="checkbox"/> | SP_PIR_KEYWORDS       | <a href="#">transport</a>                                      | <a href="#">RT</a> |  | 133   | 8.4E-2  | 5.4E-1    |
| <input type="checkbox"/> | GOTERM_BP_ALL         | <a href="#">establishment of localization</a>                  | <a href="#">RT</a> |  | 260   | 8.8E-2  | 8.1E-1    |
| <input type="checkbox"/> | GOTERM_BP_ALL         | <a href="#">transport</a>                                      | <a href="#">RT</a> |  | 250   | 1.3E-1  | 8.9E-1    |
|                          | Annotation Cluster 21 | Enrichment Score: 3.7                                          | <b>G</b>           |  |       |         |           |
| <input type="checkbox"/> | GOTERM_BP_ALL         | <a href="#">protein-RNA complex assembly</a>                   | <a href="#">RT</a> |  | 23    | 1.0E-5  | 1.1E-3    |
| <input type="checkbox"/> | GOTERM_BP_ALL         | <a href="#">cellular component assembly</a>                    | <a href="#">RT</a> |  | 61    | 3.0E-4  | 1.8E-2    |
| <input type="checkbox"/> | GOTERM_BP_ALL         | <a href="#">macromolecular complex assembly</a>                | <a href="#">RT</a> |  | 50    | 2.6E-3  | 1.1E-1    |
|                          | Annotation Cluster 22 | Enrichment Score: 3.67                                         | <b>G</b>           |  |       |         |           |
| <input type="checkbox"/> | SP_PIR_KEYWORDS       | <a href="#">lipid synthesis</a>                                | <a href="#">RT</a> |  | 32    | 1.4E-12 | 1.1E-10   |
| <input type="checkbox"/> | SP_PIR_KEYWORDS       | <a href="#">fatty acid biosynthesis</a>                        | <a href="#">RT</a> |  | 14    | 3.6E-5  | 9.9E-4    |
| <input type="checkbox"/> | GOTERM_BP_ALL         | <a href="#">fatty acid biosynthetic process</a>                | <a href="#">RT</a> |  | 16    | 1.2E-3  | 5.5E-2    |
| <input type="checkbox"/> | GOTERM_BP_ALL         | <a href="#">organic acid biosynthetic process</a>              | <a href="#">RT</a> |  | 16    | 2.1E-3  | 9.2E-2    |
| <input type="checkbox"/> | GOTERM_BP_ALL         | <a href="#">carboxylic acid biosynthetic process</a>           | <a href="#">RT</a> |  | 16    | 2.1E-3  | 9.2E-2    |
| <input type="checkbox"/> | GOTERM_BP_ALL         | <a href="#">monocarboxylic acid metabolic process</a>          | <a href="#">RT</a> |  | 26    | 2.4E-1  | 9.7E-1    |
| <input type="checkbox"/> | GOTERM_BP_ALL         | <a href="#">fatty acid metabolic process</a>                   | <a href="#">RT</a> |  | 18    | 3.5E-1  | 9.9E-1    |
|                          | Annotation Cluster 23 | Enrichment Score: 3.65                                         | <b>G</b>           |  |       |         |           |
| <input type="checkbox"/> | GOTERM_CC_ALL         | <a href="#">nuclear part</a>                                   | <a href="#">RT</a> |  | 160   | 1.7E-10 | 6.7E-9    |
| <input type="checkbox"/> | GOTERM_CC_ALL         | <a href="#">nucleolus</a>                                      | <a href="#">RT</a> |  | 38    | 1.4E-9  | 5.3E-8    |
| <input type="checkbox"/> | GOTERM_CC_ALL         | <a href="#">organelle lumen</a>                                | <a href="#">RT</a> |  | 107   | 3.2E-4  | 5.5E-3    |
| <input type="checkbox"/> | GOTERM_CC_ALL         | <a href="#">membrane-enclosed lumen</a>                        | <a href="#">RT</a> |  | 107   | 3.2E-4  | 5.5E-3    |
| <input type="checkbox"/> | GOTERM_CC_ALL         | <a href="#">nuclear lumen</a>                                  | <a href="#">RT</a> |  | 93    | 1.5E-3  | 2.3E-2    |
| <input type="checkbox"/> | GOTERM_CC_ALL         | <a href="#">nucleoplasm</a>                                    | <a href="#">RT</a> |  | 60    | 3.5E-1  | 8.9E-1    |
| <input type="checkbox"/> | GOTERM_CC_ALL         | <a href="#">nucleoplasm part</a>                               | <a href="#">RT</a> |  | 53    | 5.6E-1  | 9.8E-1    |
| <input type="checkbox"/> | GOTERM_CC_ALL         | <a href="#">transcription factor complex</a>                   | <a href="#">RT</a> |  | 34    | 9.1E-1  | 1.0E0     |
|                          | Annotation Cluster 24 | Enrichment Score: 3.58                                         | <b>G</b>           |  |       |         |           |
| <input type="checkbox"/> | GOTERM_MF_ALL         | <a href="#">lyase activity</a>                                 | <a href="#">RT</a> |  | 33    | 6.5E-5  | 9.1E-3    |
| <input type="checkbox"/> | GOTERM_MF_ALL         | <a href="#">hydro-lyase activity</a>                           | <a href="#">RT</a> |  | 16    | 1.4E-4  | 1.7E-2    |
| <input type="checkbox"/> | GOTERM_MF_ALL         | <a href="#">carbon-oxygen lyase activity</a>                   | <a href="#">RT</a> |  | 17    | 2.8E-4  | 2.8E-2    |
| <input type="checkbox"/> | GOTERM_MF_ALL         | <a href="#">pseudouridylate synthase activity</a>              | <a href="#">RT</a> |  | 6     | 1.9E-3  | 1.0E-1    |
|                          | Annotation Cluster 25 | Enrichment Score: 3.54                                         | <b>G</b>           |  |       |         |           |
| <input type="checkbox"/> | GOTERM_CC_ALL         | <a href="#">organelle envelope</a>                             | <a href="#">RT</a> |  | 69    | 1.6E-6  | 4.1E-5    |
| <input type="checkbox"/> | GOTERM_CC_ALL         | <a href="#">envelope</a>                                       | <a href="#">RT</a> |  | 69    | 2.0E-6  | 5.2E-5    |

| <input type="checkbox"/> |                       |                                                                   |                    |  |  |  |  |       |         |           |
|--------------------------|-----------------------|-------------------------------------------------------------------|--------------------|--|--|--|--|-------|---------|-----------|
| <input type="checkbox"/> | GOTERM_CC_ALL         | <a href="#">organelle membrane</a>                                | <a href="#">RT</a> |  |  |  |  | 94    | 2.3E-6  | 5.6E-5    |
| <input type="checkbox"/> | GOTERM_CC_ALL         | <a href="#">organelle inner membrane</a>                          | <a href="#">RT</a> |  |  |  |  | 39    | 2.1E-3  | 3.0E-2    |
| <input type="checkbox"/> | GOTERM_CC_ALL         | <a href="#">mitochondrial part</a>                                | <a href="#">RT</a> |  |  |  |  | 47    | 5.7E-3  | 7.2E-2    |
| <input type="checkbox"/> | GOTERM_CC_ALL         | <a href="#">mitochondrial envelope</a>                            | <a href="#">RT</a> |  |  |  |  | 41    | 6.6E-3  | 8.1E-2    |
| <input type="checkbox"/> | GOTERM_CC_ALL         | <a href="#">mitochondrial membrane</a>                            | <a href="#">RT</a> |  |  |  |  | 38    | 9.3E-3  | 1.1E-1    |
| <input type="checkbox"/> | GOTERM_CC_ALL         | <a href="#">mitochondrial inner membrane</a>                      | <a href="#">RT</a> |  |  |  |  | 35    | 9.9E-3  | 1.1E-1    |
|                          | Annotation Cluster 26 | Enrichment Score: 3.32                                            | <b>G</b>           |  |  |  |  | Count | P_Value | Benjamini |
| <input type="checkbox"/> | GOTERM_BP_ALL         | <a href="#">DNA replication initiation</a>                        | <a href="#">RT</a> |  |  |  |  | 13    | 4.9E-9  | 1.1E-6    |
| <input type="checkbox"/> | SMART                 | <a href="#">MCM</a>                                               | <a href="#">RT</a> |  |  |  |  | 7     | 3.8E-6  | 5.7E-4    |
| <input type="checkbox"/> | UP_SEQ_FEATURE        | domain:MCM                                                        | <a href="#">RT</a> |  |  |  |  | 7     | 7.9E-6  | 1.6E-2    |
| <input type="checkbox"/> | INTERPRO              | <a href="#">MCM</a>                                               | <a href="#">RT</a> |  |  |  |  | 7     | 1.1E-5  | 9.3E-3    |
| <input type="checkbox"/> | INTERPRO              | <a href="#">Nucleic acid-binding, OB-fold</a>                     | <a href="#">RT</a> |  |  |  |  | 14    | 1.9E-4  | 8.3E-2    |
| <input type="checkbox"/> | GOTERM_MF_ALL         | <a href="#">DNA-dependent ATPase activity</a>                     | <a href="#">RT</a> |  |  |  |  | 12    | 2.6E-4  | 2.7E-2    |
| <input type="checkbox"/> | SP_PIR_KEYWORDS       | <a href="#">DNA replication initiation</a>                        | <a href="#">RT</a> |  |  |  |  | 5     | 3.3E-4  | 7.0E-3    |
| <input type="checkbox"/> | GOTERM_MF_ALL         | <a href="#">single-stranded DNA binding</a>                       | <a href="#">RT</a> |  |  |  |  | 10    | 1.8E-3  | 9.9E-2    |
| <input type="checkbox"/> | GOTERM_BP_ALL         | <a href="#">DNA duplex unwinding</a>                              | <a href="#">RT</a> |  |  |  |  | 6     | 4.9E-3  | 1.6E-1    |
| <input type="checkbox"/> | GOTERM_BP_ALL         | <a href="#">DNA geometric change</a>                              | <a href="#">RT</a> |  |  |  |  | 6     | 4.9E-3  | 1.6E-1    |
| <input type="checkbox"/> | GOTERM_BP_ALL         | <a href="#">DNA unwinding during replication</a>                  | <a href="#">RT</a> |  |  |  |  | 6     | 4.9E-3  | 1.6E-1    |
| <input type="checkbox"/> | SP_PIR_KEYWORDS       | <a href="#">heterohexamer</a>                                     | <a href="#">RT</a> |  |  |  |  | 3     | 2.4E-2  | 2.5E-1    |
| <input type="checkbox"/> | GOTERM_MF_ALL         | <a href="#">DNA helicase activity</a>                             | <a href="#">RT</a> |  |  |  |  | 4     | 3.5E-1  | 1.0E0     |
| <input type="checkbox"/> | SP_PIR_KEYWORDS       | <a href="#">zinc finger</a>                                       | <a href="#">RT</a> |  |  |  |  | 7     | 7.5E-1  | 1.0E0     |
|                          | Annotation Cluster 27 | Enrichment Score: 3.25                                            | <b>G</b>           |  |  |  |  | Count | P_Value | Benjamini |
| <input type="checkbox"/> | GOTERM_BP_ALL         | <a href="#">response to DNA damage stimulus</a>                   | <a href="#">RT</a> |  |  |  |  | 46    | 2.0E-5  | 2.1E-3    |
| <input type="checkbox"/> | GOTERM_BP_ALL         | <a href="#">DNA repair</a>                                        | <a href="#">RT</a> |  |  |  |  | 36    | 3.0E-4  | 1.8E-2    |
| <input type="checkbox"/> | GOTERM_BP_ALL         | <a href="#">response to endogenous stimulus</a>                   | <a href="#">RT</a> |  |  |  |  | 46    | 4.2E-4  | 2.4E-2    |
| <input type="checkbox"/> | SP_PIR_KEYWORDS       | <a href="#">DNA damage</a>                                        | <a href="#">RT</a> |  |  |  |  | 26    | 1.1E-3  | 1.9E-2    |
| <input type="checkbox"/> | SP_PIR_KEYWORDS       | <a href="#">DNA repair</a>                                        | <a href="#">RT</a> |  |  |  |  | 23    | 3.4E-3  | 5.1E-2    |
| <input type="checkbox"/> | GOTERM_BP_ALL         | <a href="#">response to stress</a>                                | <a href="#">RT</a> |  |  |  |  | 102   | 3.5E-3  | 1.4E-1    |
|                          | Annotation Cluster 28 | Enrichment Score: 3.2                                             | <b>G</b>           |  |  |  |  | Count | P_Value | Benjamini |
| <input type="checkbox"/> | GOTERM_BP_ALL         | <a href="#">nitrogen compound biosynthetic process</a>            | <a href="#">RT</a> |  |  |  |  | 22    | 2.2E-4  | 1.4E-2    |
| <input type="checkbox"/> | GOTERM_BP_ALL         | <a href="#">amine biosynthetic process</a>                        | <a href="#">RT</a> |  |  |  |  | 18    | 3.4E-4  | 2.0E-2    |
| <input type="checkbox"/> | GOTERM_BP_ALL         | <a href="#">amino acid biosynthetic process</a>                   | <a href="#">RT</a> |  |  |  |  | 12    | 3.5E-3  | 1.4E-1    |
|                          | Annotation Cluster 29 | Enrichment Score: 3.19                                            | <b>G</b>           |  |  |  |  | Count | P_Value | Benjamini |
| <input type="checkbox"/> | GOTERM_BP_ALL         | <a href="#">protein-RNA complex assembly</a>                      | <a href="#">RT</a> |  |  |  |  | 23    | 1.0E-5  | 1.1E-3    |
| <input type="checkbox"/> | GOTERM_MF_ALL         | <a href="#">translation initiation factor activity</a>            | <a href="#">RT</a> |  |  |  |  | 18    | 1.1E-3  | 7.2E-2    |
| <input type="checkbox"/> | SP_PIR_KEYWORDS       | <a href="#">initiation factor</a>                                 | <a href="#">RT</a> |  |  |  |  | 16    | 1.1E-3  | 1.9E-2    |
| <input type="checkbox"/> | GOTERM_BP_ALL         | <a href="#">translational initiation</a>                          | <a href="#">RT</a> |  |  |  |  | 14    | 1.4E-3  | 6.7E-2    |
| <input type="checkbox"/> | GOTERM_MF_ALL         | <a href="#">translation factor activity, nucleic acid binding</a> | <a href="#">RT</a> |  |  |  |  | 23    | 1.5E-3  | 9.3E-2    |
| <input type="checkbox"/> | GOTERM_MF_ALL         | <a href="#">translation regulator activity</a>                    | <a href="#">RT</a> |  |  |  |  | 23    | 2.9E-3  | 1.4E-1    |
|                          | Annotation Cluster 30 | Enrichment Score: 3.17                                            | <b>G</b>           |  |  |  |  | Count | P_Value | Benjamini |
| <input type="checkbox"/> | GOTERM_BP_ALL         | <a href="#">nucleocytoplasmic transport</a>                       | <a href="#">RT</a> |  |  |  |  | 25    | 2.2E-4  | 1.4E-2    |
| <input type="checkbox"/> | GOTERM_BP_ALL         | <a href="#">nuclear transport</a>                                 | <a href="#">RT</a> |  |  |  |  | 25    | 2.5E-4  | 1.6E-2    |
| <input type="checkbox"/> | GOTERM_BP_ALL         | <a href="#">protein targeting</a>                                 | <a href="#">RT</a> |  |  |  |  | 40    | 4.8E-4  | 2.7E-2    |
| <input type="checkbox"/> | GOTERM_BP_ALL         | <a href="#">protein import</a>                                    | <a href="#">RT</a> |  |  |  |  | 19    | 5.0E-4  | 2.8E-2    |
| <input type="checkbox"/> | GOTERM_BP_ALL         | <a href="#">nuclear import</a>                                    | <a href="#">RT</a> |  |  |  |  | 16    | 1.8E-3  | 8.2E-2    |
| <input type="checkbox"/> | GOTERM_BP_ALL         | <a href="#">protein import into nucleus</a>                       | <a href="#">RT</a> |  |  |  |  | 15    | 3.8E-3  | 1.4E-1    |
|                          | Annotation Cluster 31 | Enrichment Score: 3.17                                            | <b>G</b>           |  |  |  |  | Count | P_Value | Benjamini |
| <input type="checkbox"/> | GOTERM_BP_ALL         | <a href="#">chromosome segregation</a>                            | <a href="#">RT</a> |  |  |  |  | 22    | 1.8E-8  | 3.5E-6    |
| <input type="checkbox"/> | GOTERM_BP_ALL         | <a href="#">mitotic sister chromatid segregation</a>              | <a href="#">RT</a> |  |  |  |  | 9     | 8.0E-4  | 4.0E-2    |
| <input type="checkbox"/> | GOTERM_BP_ALL         | <a href="#">sister chromatid segregation</a>                      | <a href="#">RT</a> |  |  |  |  | 9     | 1.1E-3  | 5.4E-2    |

| <input type="checkbox"/> | GOTERM_BP_ALL         | <a href="#">mitotic chromosome condensation</a>                | <a href="#">RT</a> |  |  |  |  | 6     | 9.8E-3  | 2.8E-1    |
|--------------------------|-----------------------|----------------------------------------------------------------|--------------------|--|--|--|--|-------|---------|-----------|
| <input type="checkbox"/> | GOTERM_BP_ALL         | <a href="#">chromosome condensation</a>                        | <a href="#">RT</a> |  |  |  |  | 7     | 1.1E-2  | 2.9E-1    |
| <input type="checkbox"/> | SP_PIR_KEYWORDS       | <a href="#">dna condensation</a>                               | <a href="#">RT</a> |  |  |  |  | 4     | 5.7E-2  | 4.3E-1    |
|                          | Annotation Cluster 32 | Enrichment Score: 3.11                                         | <b>G</b>           |  |  |  |  | Count | P_Value | Benjamini |
| <input type="checkbox"/> | GOTERM_CC_ALL         | <a href="#">mitochondrion</a>                                  | <a href="#">RT</a> |  |  |  |  | 122   | 1.0E-5  | 2.1E-4    |
| <input type="checkbox"/> | GOTERM_CC_ALL         | <a href="#">mitochondrial part</a>                             | <a href="#">RT</a> |  |  |  |  | 47    | 5.7E-3  | 7.2E-2    |
| <input type="checkbox"/> | SP_PIR_KEYWORDS       | <a href="#">Mitochondrion</a>                                  | <a href="#">RT</a> |  |  |  |  | 76    | 8.2E-3  | 1.1E-1    |
|                          | Annotation Cluster 33 | Enrichment Score: 2.98                                         | <b>G</b>           |  |  |  |  | Count | P_Value | Benjamini |
| <input type="checkbox"/> | SP_PIR_KEYWORDS       | <a href="#">nucleotide binding</a>                             | <a href="#">RT</a> |  |  |  |  | 20    | 1.5E-4  | 3.5E-3    |
| <input type="checkbox"/> | SP_PIR_KEYWORDS       | <a href="#">P-loop</a>                                         | <a href="#">RT</a> |  |  |  |  | 20    | 1.8E-4  | 4.0E-3    |
| <input type="checkbox"/> | SP_PIR_KEYWORDS       | <a href="#">GTP binding</a>                                    | <a href="#">RT</a> |  |  |  |  | 9     | 4.0E-2  | 3.4E-1    |
|                          | Annotation Cluster 34 | Enrichment Score: 2.89                                         | <b>G</b>           |  |  |  |  | Count | P_Value | Benjamini |
| <input type="checkbox"/> | GOTERM_CC_ALL         | <a href="#">microtubule cytoskeleton</a>                       | <a href="#">RT</a> |  |  |  |  | 60    | 7.5E-8  | 2.5E-6    |
| <input type="checkbox"/> | GOTERM_CC_ALL         | <a href="#">microtubule</a>                                    | <a href="#">RT</a> |  |  |  |  | 41    | 6.3E-7  | 1.8E-5    |
| <input type="checkbox"/> | GOTERM_CC_ALL         | <a href="#">cytoskeletal part</a>                              | <a href="#">RT</a> |  |  |  |  | 82    | 4.4E-6  | 9.9E-5    |
| <input type="checkbox"/> | GOTERM_BP_ALL         | <a href="#">microtubule-based process</a>                      | <a href="#">RT</a> |  |  |  |  | 40    | 5.4E-6  | 6.7E-4    |
| <input type="checkbox"/> | SP_PIR_KEYWORDS       | <a href="#">microtubule</a>                                    | <a href="#">RT</a> |  |  |  |  | 28    | 4.3E-4  | 8.4E-3    |
| <input type="checkbox"/> | GOTERM_BP_ALL         | <a href="#">microtubule-based movement</a>                     | <a href="#">RT</a> |  |  |  |  | 20    | 3.1E-3  | 1.3E-1    |
| <input type="checkbox"/> | GOTERM_BP_ALL         | <a href="#">cytoskeleton-dependent intracellular transport</a> | <a href="#">RT</a> |  |  |  |  | 22    | 3.8E-3  | 1.4E-1    |
| <input type="checkbox"/> | GOTERM_BP_ALL         | <a href="#">cytoskeleton organization and biogenesis</a>       | <a href="#">RT</a> |  |  |  |  | 66    | 3.9E-3  | 1.4E-1    |
| <input type="checkbox"/> | GOTERM_CC_ALL         | <a href="#">cytoskeleton</a>                                   | <a href="#">RT</a> |  |  |  |  | 104   | 4.3E-3  | 5.6E-2    |
| <input type="checkbox"/> | SMART                 | <a href="#">KISc</a>                                           | <a href="#">RT</a> |  |  |  |  | 9     | 4.7E-3  | 2.7E-1    |
| <input type="checkbox"/> | INTERPRO              | <a href="#">Kinesin, motor region</a>                          | <a href="#">RT</a> |  |  |  |  | 9     | 1.4E-2  | 9.4E-1    |
| <input type="checkbox"/> | GOTERM_MF_ALL         | <a href="#">microtubule motor activity</a>                     | <a href="#">RT</a> |  |  |  |  | 13    | 3.0E-2  | 6.5E-1    |
| <input type="checkbox"/> | SP_PIR_KEYWORDS       | <a href="#">motor protein</a>                                  | <a href="#">RT</a> |  |  |  |  | 15    | 4.2E-2  | 3.5E-1    |
| <input type="checkbox"/> | GOTERM_CC_ALL         | <a href="#">kinesin complex</a>                                | <a href="#">RT</a> |  |  |  |  | 6     | 1.7E-1  | 7.0E-1    |
| <input type="checkbox"/> | GOTERM_MF_ALL         | <a href="#">motor activity</a>                                 | <a href="#">RT</a> |  |  |  |  | 17    | 2.0E-1  | 9.8E-1    |
| <input type="checkbox"/> | GOTERM_CC_ALL         | <a href="#">microtubule associated complex</a>                 | <a href="#">RT</a> |  |  |  |  | 13    | 2.1E-1  | 7.5E-1    |
|                          | Annotation Cluster 35 | Enrichment Score: 2.77                                         | <b>G</b>           |  |  |  |  | Count | P_Value | Benjamini |
| <input type="checkbox"/> | GOTERM_BP_ALL         | <a href="#">amino acid and derivative metabolic process</a>    | <a href="#">RT</a> |  |  |  |  | 51    | 5.3E-4  | 2.9E-2    |
| <input type="checkbox"/> | GOTERM_BP_ALL         | <a href="#">nitrogen compound metabolic process</a>            | <a href="#">RT</a> |  |  |  |  | 60    | 1.0E-3  | 5.0E-2    |
| <input type="checkbox"/> | GOTERM_BP_ALL         | <a href="#">amino acid metabolic process</a>                   | <a href="#">RT</a> |  |  |  |  | 41    | 1.2E-3  | 5.8E-2    |
| <input type="checkbox"/> | GOTERM_BP_ALL         | <a href="#">amine metabolic process</a>                        | <a href="#">RT</a> |  |  |  |  | 55    | 2.1E-3  | 9.2E-2    |
| <input type="checkbox"/> | GOTERM_BP_ALL         | <a href="#">carboxylic acid metabolic process</a>              | <a href="#">RT</a> |  |  |  |  | 67    | 4.0E-3  | 1.5E-1    |
| <input type="checkbox"/> | GOTERM_BP_ALL         | <a href="#">organic acid metabolic process</a>                 | <a href="#">RT</a> |  |  |  |  | 67    | 4.2E-3  | 1.5E-1    |
|                          | Annotation Cluster 36 | Enrichment Score: 2.69                                         | <b>G</b>           |  |  |  |  | Count | P_Value | Benjamini |
| <input type="checkbox"/> | GOTERM_MF_ALL         | <a href="#">snoRNA binding</a>                                 | <a href="#">RT</a> |  |  |  |  | 6     | 2.8E-4  | 2.7E-2    |
| <input type="checkbox"/> | GOTERM_CC_ALL         | <a href="#">small nucleolar ribonucleoprotein complex</a>      | <a href="#">RT</a> |  |  |  |  | 7     | 2.0E-3  | 2.9E-2    |
| <input type="checkbox"/> | GOTERM_CC_ALL         | <a href="#">nucleolar part</a>                                 | <a href="#">RT</a> |  |  |  |  | 9     | 1.6E-2  | 1.6E-1    |
|                          | Annotation Cluster 37 | Enrichment Score: 2.55                                         | <b>G</b>           |  |  |  |  | Count | P_Value | Benjamini |
| <input type="checkbox"/> | UP_SEQ_FEATURE        | domain:RRM 1                                                   | <a href="#">RT</a> |  |  |  |  | 15    | 3.2E-4  | 3.0E-1    |
| <input type="checkbox"/> | UP_SEQ_FEATURE        | domain:RRM 2                                                   | <a href="#">RT</a> |  |  |  |  | 15    | 3.2E-4  | 3.0E-1    |
| <input type="checkbox"/> | UP_SEQ_FEATURE        | domain:RRM 3                                                   | <a href="#">RT</a> |  |  |  |  | 5     | 2.1E-1  | 1.0E0     |
|                          | Annotation Cluster 38 | Enrichment Score: 2.5                                          | <b>G</b>           |  |  |  |  | Count | P_Value | Benjamini |
| <input type="checkbox"/> | INTERPRO              | <a href="#">Chaperonin Cpn60</a>                               | <a href="#">RT</a> |  |  |  |  | 6     | 9.3E-4  | 2.9E-1    |
| <input type="checkbox"/> | INTERPRO              | <a href="#">Chaperonin TCP-1</a>                               | <a href="#">RT</a> |  |  |  |  | 6     | 1.6E-3  | 4.2E-1    |
| <input type="checkbox"/> | GOTERM_CC_ALL         | <a href="#">chaperonin-containing T-complex</a>                | <a href="#">RT</a> |  |  |  |  | 5     | 3.5E-3  | 4.7E-2    |
| <input type="checkbox"/> | PIRSUPERFAMILY        | PIRSF002584:molecular chaperone t-complex-type                 | <a href="#">RT</a> |  |  |  |  | 6     | 3.6E-3  | 9.4E-1    |
| <input type="checkbox"/> | INTERPRO              | <a href="#">Chaperonin Cpn60/TCP-1</a>                         | <a href="#">RT</a> |  |  |  |  | 5     | 1.7E-2  | 9.5E-1    |



| Annotation Cluster 39    |                 | Enrichment Score: 2.47                                                          | G  |    | Count | P_Value | Benjamini |
|--------------------------|-----------------|---------------------------------------------------------------------------------|----|---------------------------------------------------------------------------------------|-------|---------|-----------|
| <input type="checkbox"/> | SP_PIR_KEYWORDS | <a href="#">ligase</a>                                                          | RT |      | 43    | 7.7E-5  | 1.9E-3    |
| <input type="checkbox"/> | GOTERM_MF_ALL   | <a href="#">ligase activity</a>                                                 | RT |      | 50    | 2.3E-3  | 1.2E-1    |
| <input type="checkbox"/> | GOTERM_MF_ALL   | <a href="#">ligase activity, forming carbon-nitrogen bonds</a>                  | RT |      | 21    | 2.2E-1  | 9.9E-1    |
| Annotation Cluster 40    |                 | Enrichment Score: 2.46                                                          | G  |    | Count | P_Value | Benjamini |
| <input type="checkbox"/> | BIOCARTA        | <a href="#">Cell Cycle</a>                                                      | RT |      | 13    | 5.7E-5  | 8.0E-3    |
| <input type="checkbox"/> | BIOCARTA        | <a href="#">E2F1 Destruction Pathway</a>                                        | RT |      | 6     | 3.1E-3  | 1.4E-1    |
| <input type="checkbox"/> | BIOCARTA        | <a href="#">Regulation of p27 Phosphorylation during Cell Cycle Progression</a> | RT |      | 6     | 9.0E-3  | 3.1E-1    |
| <input type="checkbox"/> | BIOCARTA        | <a href="#">Cyclin E Destruction Pathway</a>                                    | RT |      | 5     | 1.3E-2  | 3.8E-1    |
| <input type="checkbox"/> | BIOCARTA        | <a href="#">Influence of Ras and Rho proteins on G1 to S Transition</a>         | RT |      | 9     | 2.4E-2  | 4.9E-1    |
| Annotation Cluster 41    |                 | Enrichment Score: 2.4                                                           | G  |    | Count | P_Value | Benjamini |
| <input type="checkbox"/> | GOTERM_MF_ALL   | <a href="#">transferase activity, transferring one-carbon groups</a>            | RT |      | 31    | 2.1E-4  | 2.3E-2    |
| <input type="checkbox"/> | GOTERM_MF_ALL   | <a href="#">methyltransferase activity</a>                                      | RT |      | 30    | 3.4E-4  | 2.7E-2    |
| <input type="checkbox"/> | SP_PIR_KEYWORDS | <a href="#">methyltransferase</a>                                               | RT |      | 21    | 4.0E-3  | 5.6E-2    |
| <input type="checkbox"/> | GOTERM_MF_ALL   | <a href="#">S-adenosylmethionine-dependent methyltransferase activity</a>       | RT |      | 13    | 3.6E-2  | 6.9E-1    |
| <input type="checkbox"/> | SP_PIR_KEYWORDS | <a href="#">s-adenosyl-l-methionine</a>                                         | RT |      | 11    | 1.0E-1  | 5.8E-1    |
| Annotation Cluster 42    |                 | Enrichment Score: 2.38                                                          | G  |    | Count | P_Value | Benjamini |
| <input type="checkbox"/> | UP_SEQ_FEATURE  | short sequence motif:Histidine box-3                                            | RT |      | 4     | 4.1E-3  | 9.6E-1    |
| <input type="checkbox"/> | UP_SEQ_FEATURE  | short sequence motif:Histidine box-2                                            | RT |      | 4     | 4.1E-3  | 9.6E-1    |
| <input type="checkbox"/> | UP_SEQ_FEATURE  | short sequence motif:Histidine box-1                                            | RT |      | 4     | 4.1E-3  | 9.6E-1    |
| Annotation Cluster 43    |                 | Enrichment Score: 2.37                                                          | G  |    | Count | P_Value | Benjamini |
| <input type="checkbox"/> | GOTERM_MF_ALL   | <a href="#">GTPase activity</a>                                                 | RT |      | 30    | 7.6E-5  | 1.0E-2    |
| <input type="checkbox"/> | GOTERM_MF_ALL   | <a href="#">guanyl nucleotide binding</a>                                       | RT |      | 49    | 1.4E-3  | 9.2E-2    |
| <input type="checkbox"/> | GOTERM_MF_ALL   | <a href="#">guanyl ribonucleotide binding</a>                                   | RT |    | 49    | 1.4E-3  | 9.2E-2    |
| <input type="checkbox"/> | GOTERM_MF_ALL   | <a href="#">GTP binding</a>                                                     | RT |    | 48    | 1.7E-3  | 9.7E-2    |
| <input type="checkbox"/> | SP_PIR_KEYWORDS | <a href="#">GTP-binding</a>                                                     | RT |    | 39    | 7.4E-3  | 1.0E-1    |
| <input type="checkbox"/> | UP_SEQ_FEATURE  | nucleotide phosphate-binding region:GTP                                         | RT |    | 29    | 6.6E-2  | 1.0E0     |
| <input type="checkbox"/> | INTERPRO        | <a href="#">Small GTP-binding protein domain</a>                                | RT |    | 17    | 2.0E-1  | 1.0E0     |
| Annotation Cluster 44    |                 | Enrichment Score: 2.37                                                          | G  |  | Count | P_Value | Benjamini |
| <input type="checkbox"/> | UP_SEQ_FEATURE  | domain:Thioredoxin 1                                                            | RT |    | 6     | 2.1E-4  | 2.4E-1    |
| <input type="checkbox"/> | UP_SEQ_FEATURE  | domain:Thioredoxin 2                                                            | RT |    | 6     | 2.1E-4  | 2.4E-1    |
| <input type="checkbox"/> | INTERPRO        | <a href="#">Disulphide isomerase</a>                                            | RT |    | 5     | 2.8E-4  | 1.0E-1    |
| <input type="checkbox"/> | UP_SEQ_FEATURE  | short sequence motif:Prevents secretion from ER                                 | RT |    | 12    | 1.2E-3  | 6.7E-1    |
| <input type="checkbox"/> | SP_PIR_KEYWORDS | <a href="#">redox-active center</a>                                             | RT |    | 11    | 1.5E-3  | 2.4E-2    |
| <input type="checkbox"/> | INTERPRO        | <a href="#">Thioredoxin domain</a>                                              | RT |    | 8     | 2.9E-3  | 5.8E-1    |
| <input type="checkbox"/> | GOTERM_MF_ALL   | <a href="#">intramolecular oxidoreductase activity</a>                          | RT |    | 12    | 2.9E-3  | 1.4E-1    |
| <input type="checkbox"/> | PIR_SUPERFAMILY | PIRSF001487:protein disulfide-isomerase                                         | RT |    | 5     | 3.4E-3  | 9.7E-1    |
| <input type="checkbox"/> | GOTERM_MF_ALL   | <a href="#">protein disulfide isomerase activity</a>                            | RT |    | 5     | 3.6E-3  | 1.6E-1    |
| <input type="checkbox"/> | UP_SEQ_FEATURE  | site:Contributes to redox potential value                                       | RT |    | 4     | 4.1E-3  | 9.6E-1    |
| <input type="checkbox"/> | GOTERM_BP_ALL   | <a href="#">cell redox homeostasis</a>                                          | RT |    | 12    | 7.9E-3  | 2.3E-1    |
| <input type="checkbox"/> | INTERPRO        | <a href="#">Thioredoxin-related</a>                                             | RT |    | 8     | 9.4E-3  | 8.7E-1    |
| <input type="checkbox"/> | UP_SEQ_FEATURE  | domain:Thioredoxin 3                                                            | RT |    | 3     | 3.0E-2  | 1.0E0     |
| <input type="checkbox"/> | INTERPRO        | <a href="#">Endoplasmic reticulum targeting sequence</a>                        | RT |    | 10    | 4.1E-2  | 9.9E-1    |
| <input type="checkbox"/> | GOTERM_MF_ALL   | <a href="#">electron carrier activity</a>                                       | RT |    | 25    | 8.0E-2  | 8.7E-1    |
| <input type="checkbox"/> | INTERPRO        | <a href="#">Thioredoxin fold</a>                                                | RT |    | 11    | 1.6E-1  | 1.0E0     |
| Annotation Cluster 45    |                 | Enrichment Score: 2.3                                                           | G  |  | Count | P_Value | Benjamini |
| <input type="checkbox"/> | GOTERM_BP_ALL   | <a href="#">meiotic cell cycle</a>                                              | RT |    | 17    | 2.1E-3  | 9.2E-2    |
| <input type="checkbox"/> | GOTERM_BP_ALL   | <a href="#">meiosis</a>                                                         | RT |    | 16    | 4.8E-3  | 1.6E-1    |

| <input type="checkbox"/> | Category              | Term                                                                | RT                 | Bar | Count | P_Value | Benjamini |
|--------------------------|-----------------------|---------------------------------------------------------------------|--------------------|-----|-------|---------|-----------|
| <input type="checkbox"/> |                       | <a href="#">M phase of meiotic cell cycle</a>                       | <a href="#">RT</a> |     | 16    | 4.8E-3  | 1.6E-1    |
| <input type="checkbox"/> |                       | <a href="#">meiosis I</a>                                           | <a href="#">RT</a> |     | 8     | 1.3E-2  | 3.3E-1    |
|                          | Annotation Cluster 46 | Enrichment Score: 2.25                                              | <b>G</b>           |     | Count | P_Value | Benjamini |
| <input type="checkbox"/> |                       | <a href="#">replication fork</a>                                    | <a href="#">RT</a> |     | 12    | 6.8E-6  | 1.5E-4    |
| <input type="checkbox"/> |                       | <a href="#">replisome</a>                                           | <a href="#">RT</a> |     | 5     | 1.3E-2  | 1.4E-1    |
| <input type="checkbox"/> |                       | <a href="#">nuclear replication fork</a>                            | <a href="#">RT</a> |     | 5     | 1.3E-2  | 1.4E-1    |
| <input type="checkbox"/> |                       | <a href="#">nuclear replisome</a>                                   | <a href="#">RT</a> |     | 5     | 1.3E-2  | 1.4E-1    |
| <input type="checkbox"/> |                       | <a href="#">alpha DNA polymerase:primase complex</a>                | <a href="#">RT</a> |     | 3     | 4.3E-2  | 3.1E-1    |
| <input type="checkbox"/> |                       | <a href="#">DNA primase activity</a>                                | <a href="#">RT</a> |     | 3     | 4.4E-2  | 7.5E-1    |
|                          | Annotation Cluster 47 | Enrichment Score: 2.25                                              | <b>G</b>           |     | Count | P_Value | Benjamini |
| <input type="checkbox"/> |                       | <a href="#">nucleotidyltransferase activity</a>                     | <a href="#">RT</a> |     | 23    | 8.7E-4  | 6.3E-2    |
| <input type="checkbox"/> |                       | <a href="#">DNA-directed RNA polymerase activity</a>                | <a href="#">RT</a> |     | 11    | 1.8E-3  | 9.9E-2    |
| <input type="checkbox"/> |                       | <a href="#">dna-directed rna polymerase</a>                         | <a href="#">RT</a> |     | 10    | 2.3E-3  | 3.7E-2    |
| <input type="checkbox"/> |                       | <a href="#">RNA polymerase</a>                                      | <a href="#">RT</a> |     | 5     | 2.9E-1  | 8.3E-1    |
|                          | Annotation Cluster 48 | Enrichment Score: 2.09                                              | <b>G</b>           |     | Count | P_Value | Benjamini |
| <input type="checkbox"/> |                       | <a href="#">pseudouridylate synthase activity</a>                   | <a href="#">RT</a> |     | 6     | 1.9E-3  | 1.0E-1    |
| <input type="checkbox"/> |                       | <a href="#">tRNA processing</a>                                     | <a href="#">RT</a> |     | 12    | 1.2E-2  | 3.2E-1    |
| <input type="checkbox"/> |                       | <a href="#">trna processing</a>                                     | <a href="#">RT</a> |     | 9     | 2.4E-2  | 2.5E-1    |
|                          | Annotation Cluster 49 | Enrichment Score: 2.06                                              | <b>G</b>           |     | Count | P_Value | Benjamini |
| <input type="checkbox"/> |                       | <a href="#">Transcription factor E2F/dimerisation partner (TDP)</a> | <a href="#">RT</a> |     | 7     | 1.5E-4  | 7.5E-2    |
| <input type="checkbox"/> |                       | <a href="#">E2F Family</a>                                          | <a href="#">RT</a> |     | 6     | 2.4E-4  | 9.4E-2    |
| <input type="checkbox"/> |                       | short sequence motif:DEF box                                        | <a href="#">RT</a> |     | 4     | 9.5E-3  | 1.0E0     |
| <input type="checkbox"/> |                       | region of interest:Cyclin A/CDK2 binding                            | <a href="#">RT</a> |     | 3     | 3.0E-2  | 1.0E0     |
| <input type="checkbox"/> |                       | PIRSF019596:transcription factor E2F                                | <a href="#">RT</a> |     | 3     | 5.9E-2  | 1.0E0     |
| <input type="checkbox"/> |                       | region of interest:Dimerization                                     | <a href="#">RT</a> |     | 4     | 7.7E-2  | 1.0E0     |
| <input type="checkbox"/> |                       | region of interest:Transactivation                                  | <a href="#">RT</a> |     | 3     | 8.7E-2  | 1.0E0     |
|                          | Annotation Cluster 50 | Enrichment Score: 2                                                 | <b>G</b>           |     | Count | P_Value | Benjamini |
| <input type="checkbox"/> |                       | <a href="#">protein polymerization</a>                              | <a href="#">RT</a> |     | 15    | 8.8E-5  | 6.8E-3    |
| <input type="checkbox"/> |                       | <a href="#">Cytoskeleton</a>                                        | <a href="#">RT</a> |     | 13    | 4.3E-4  | 1.7E-2    |
| <input type="checkbox"/> |                       | PIRSF002306:tubulin                                                 | <a href="#">RT</a> |     | 8     | 1.7E-3  | 9.3E-1    |
| <input type="checkbox"/> |                       | <a href="#">Tubulin/FtsZ, GTPase</a>                                | <a href="#">RT</a> |     | 6     | 7.6E-3  | 8.4E-1    |
| <input type="checkbox"/> |                       | <a href="#">Tubulin/FtsZ, C-terminal</a>                            | <a href="#">RT</a> |     | 6     | 7.6E-3  | 8.4E-1    |
| <input type="checkbox"/> |                       | <a href="#">Tubulin</a>                                             | <a href="#">RT</a> |     | 6     | 3.3E-2  | 9.8E-1    |
| <input type="checkbox"/> |                       | <a href="#">Alpha tubulin</a>                                       | <a href="#">RT</a> |     | 3     | 9.2E-2  | 1.0E0     |
| <input type="checkbox"/> |                       | <a href="#">Gap junction</a>                                        | <a href="#">RT</a> |     | 14    | 2.0E-1  | 7.9E-1    |
| <input type="checkbox"/> |                       | <a href="#">structural constituent of cytoskeleton</a>              | <a href="#">RT</a> |     | 9     | 4.8E-1  | 1.0E0     |
|                          | Annotation Cluster 51 | Enrichment Score: 1.96                                              | <b>G</b>           |     | Count | P_Value | Benjamini |
| <input type="checkbox"/> |                       | <a href="#">heterocycle metabolic process</a>                       | <a href="#">RT</a> |     | 18    | 1.8E-3  | 8.2E-2    |
| <input type="checkbox"/> |                       | <a href="#">nucleobase metabolic process</a>                        | <a href="#">RT</a> |     | 7     | 4.7E-3  | 1.6E-1    |
| <input type="checkbox"/> |                       | <a href="#">aromatic compound metabolic process</a>                 | <a href="#">RT</a> |     | 17    | 1.5E-1  | 9.2E-1    |
|                          | Annotation Cluster 52 | Enrichment Score: 1.94                                              | <b>G</b>           |     | Count | P_Value | Benjamini |
| <input type="checkbox"/> |                       | <a href="#">macromolecule metabolic process</a>                     | <a href="#">RT</a> |     | 628   | 9.7E-6  | 1.1E-3    |
| <input type="checkbox"/> |                       | <a href="#">protein metabolic process</a>                           | <a href="#">RT</a> |     | 346   | 6.8E-5  | 5.5E-3    |
| <input type="checkbox"/> |                       | <a href="#">cellular protein metabolic process</a>                  | <a href="#">RT</a> |     | 329   | 1.6E-4  | 1.1E-2    |
| <input type="checkbox"/> |                       | <a href="#">cellular macromolecule metabolic process</a>            | <a href="#">RT</a> |     | 329   | 4.7E-4  | 2.7E-2    |
| <input type="checkbox"/> |                       | <a href="#">biopolymer modification</a>                             | <a href="#">RT</a> |     | 158   | 4.6E-1  | 1.0E0     |
| <input type="checkbox"/> |                       | <a href="#">protein modification process</a>                        | <a href="#">RT</a> |     | 148   | 6.0E-1  | 1.0E0     |
| <input type="checkbox"/> |                       | <a href="#">phosphate metabolic process</a>                         | <a href="#">RT</a> |     | 80    | 6.1E-1  | 1.0E0     |
| <input type="checkbox"/> |                       | <a href="#">phosphorus metabolic process</a>                        | <a href="#">RT</a> |     | 80    | 6.1E-1  | 1.0E0     |
| <input type="checkbox"/> |                       | <a href="#">post-translational protein modification</a>             | <a href="#">RT</a> |     | 126   | 7.0E-1  | 1.0E0     |

| Annotation Cluster 53    |                 | Enrichment Score: 1.93                                                        | G  |  | Count | P_Value | Benjamini |
|--------------------------|-----------------|-------------------------------------------------------------------------------|----|--|-------|---------|-----------|
| <input type="checkbox"/> | GOTERM_MF_ALL   | <a href="#">DNA topoisomerase (ATP-hydrolyzing) activity</a>                  | RT |  | 5     | 6.1E-3  | 2.5E-1    |
| <input type="checkbox"/> | SMART           | <a href="#">HATPase_c</a>                                                     | RT |  | 6     | 8.1E-3  | 3.6E-1    |
| <input type="checkbox"/> | GOTERM_MF_ALL   | <a href="#">DNA topoisomerase activity</a>                                    | RT |  | 5     | 1.4E-2  | 4.3E-1    |
| <input type="checkbox"/> | GOTERM_BP_ALL   | <a href="#">DNA topological change</a>                                        | RT |  | 5     | 2.8E-2  | 5.2E-1    |
| Annotation Cluster 54    |                 | Enrichment Score: 1.91                                                        | G  |  | Count | P_Value | Benjamini |
| <input type="checkbox"/> | BIOCARTA        | <a href="#">Role of Ran in mitotic spindle regulation</a>                     | RT |  | 8     | 1.3E-4  | 9.2E-3    |
| <input type="checkbox"/> | BIOCARTA        | <a href="#">Cycling of Ran in nucleocytoplasmic transport</a>                 | RT |  | 4     | 3.4E-2  | 5.9E-1    |
| <input type="checkbox"/> | BIOCARTA        | <a href="#">Sumoylation by RanBP2 Regulates Transcriptional Repression</a>    | RT |  | 3     | 4.4E-1  | 9.6E-1    |
| Annotation Cluster 55    |                 | Enrichment Score: 1.82                                                        | G  |  | Count | P_Value | Benjamini |
| <input type="checkbox"/> | SP_PIR_KEYWORDS | <a href="#">Rotamase</a>                                                      | RT |  | 10    | 2.9E-3  | 4.5E-2    |
| <input type="checkbox"/> | GOTERM_MF_ALL   | <a href="#">peptidyl-prolyl cis-trans isomerase activity</a>                  | RT |  | 10    | 3.5E-3  | 1.6E-1    |
| <input type="checkbox"/> | GOTERM_MF_ALL   | <a href="#">cis-trans isomerase activity</a>                                  | RT |  | 10    | 4.3E-3  | 1.8E-1    |
| <input type="checkbox"/> | UP_SEQ_FEATURE  | domain:PIIase cyclophilin-type                                                | RT |  | 5     | 2.9E-2  | 1.0E0     |
| <input type="checkbox"/> | INTERPRO        | <a href="#">Peptidyl-prolyl cis-trans isomerase, cyclophilin-type</a>         | RT |  | 5     | 5.7E-2  | 9.9E-1    |
| <input type="checkbox"/> | PIR_SUPERFAMILY | PIRSF001467:peptidylprolyl isomerase                                          | RT |  | 3     | 1.7E-1  | 1.0E0     |
| Annotation Cluster 56    |                 | Enrichment Score: 1.79                                                        | G  |  | Count | P_Value | Benjamini |
| <input type="checkbox"/> | GOTERM_BP_ALL   | <a href="#">release of cytochrome c from mitochondria</a>                     | RT |  | 8     | 6.6E-5  | 5.5E-3    |
| <input type="checkbox"/> | GOTERM_BP_ALL   | <a href="#">apoptotic mitochondrial changes</a>                               | RT |  | 8     | 4.1E-3  | 1.5E-1    |
| <input type="checkbox"/> | GOTERM_BP_ALL   | <a href="#">induction of apoptosis by intracellular signals</a>               | RT |  | 7     | 6.5E-2  | 7.5E-1    |
| <input type="checkbox"/> | GOTERM_BP_ALL   | <a href="#">negative regulation of fibroblast proliferation</a>               | RT |  | 3     | 7.3E-2  | 7.7E-1    |
| <input type="checkbox"/> | GOTERM_BP_ALL   | <a href="#">regulation of fibroblast proliferation</a>                        | RT |  | 4     | 1.2E-1  | 8.7E-1    |
| <input type="checkbox"/> | GOTERM_BP_ALL   | <a href="#">fibroblast proliferation</a>                                      | RT |  | 4     | 1.2E-1  | 8.7E-1    |
| Annotation Cluster 57    |                 | Enrichment Score: 1.74                                                        | G  |  | Count | P_Value | Benjamini |
| <input type="checkbox"/> | GOTERM_BP_ALL   | <a href="#">mitochondrial membrane organization and biogenesis</a>            | RT |  | 10    | 8.9E-5  | 6.7E-3    |
| <input type="checkbox"/> | GOTERM_BP_ALL   | <a href="#">mitochondrial transport</a>                                       | RT |  | 10    | 1.7E-3  | 7.6E-2    |
| <input type="checkbox"/> | INTERPRO        | <a href="#">Zinc finger, Tim10/DDP-type</a>                                   | RT |  | 4     | 1.8E-2  | 9.5E-1    |
| <input type="checkbox"/> | GOTERM_CC_ALL   | <a href="#">mitochondrial intermembrane space protein transporter complex</a> | RT |  | 4     | 2.0E-2  | 1.8E-1    |
| <input type="checkbox"/> | GOTERM_BP_ALL   | <a href="#">protein import into mitochondrial inner membrane</a>              | RT |  | 4     | 2.2E-2  | 4.6E-1    |
| <input type="checkbox"/> | GOTERM_CC_ALL   | <a href="#">mitochondrial intermembrane space</a>                             | RT |  | 5     | 3.2E-2  | 2.5E-1    |
| <input type="checkbox"/> | GOTERM_BP_ALL   | <a href="#">inner mitochondrial membrane organization and biogenesis</a>      | RT |  | 4     | 3.2E-2  | 5.6E-1    |
| <input type="checkbox"/> | GOTERM_BP_ALL   | <a href="#">protein import into mitochondrion</a>                             | RT |  | 4     | 6.0E-2  | 7.2E-1    |
| <input type="checkbox"/> | GOTERM_BP_ALL   | <a href="#">protein targeting to mitochondrion</a>                            | RT |  | 4     | 7.7E-2  | 7.7E-1    |
| <input type="checkbox"/> | UP_SEQ_FEATURE  | short sequence motif:Twin CX3C motif                                          | RT |  | 3     | 8.7E-2  | 1.0E0     |
| <input type="checkbox"/> | GOTERM_CC_ALL   | <a href="#">organelle envelope lumen</a>                                      | RT |  | 5     | 1.7E-1  | 6.9E-1    |
| Annotation Cluster 58    |                 | Enrichment Score: 1.69                                                        | G  |  | Count | P_Value | Benjamini |
| <input type="checkbox"/> | UP_SEQ_FEATURE  | compositionally biased region:Arg/Ser-rich (RS domain)                        | RT |  | 6     | 1.1E-3  | 6.3E-1    |
| <input type="checkbox"/> | GOTERM_BP_ALL   | <a href="#">spliceosome assembly</a>                                          | RT |  | 7     | 2.5E-2  | 5.0E-1    |
| <input type="checkbox"/> | GOTERM_MF_ALL   | <a href="#">RNA splicing factor activity, transesterification mechanism</a>   | RT |  | 5     | 3.3E-2  | 6.7E-1    |
| <input type="checkbox"/> | GOTERM_BP_ALL   | <a href="#">mRNA splice site selection</a>                                    | RT |  | 5     | 4.6E-2  | 6.5E-1    |
| <input type="checkbox"/> | UP_SEQ_FEATURE  | compositionally biased region:Gly-rich (hinge region)                         | RT |  | 3     | 8.7E-2  | 1.0E0     |
| Annotation Cluster 59    |                 | Enrichment Score: 1.69                                                        | G  |  | Count | P_Value | Benjamini |
| <input type="checkbox"/> | GOTERM_CC_ALL   | <a href="#">centrosome</a>                                                    | RT |  | 13    | 6.7E-3  | 8.2E-2    |
| <input type="checkbox"/> | GOTERM_CC_ALL   | <a href="#">microtubule organizing center part</a>                            | RT |  | 6     | 3.6E-2  | 2.7E-1    |
| <input type="checkbox"/> | GOTERM_CC_ALL   | <a href="#">microtubule organizing center</a>                                 | RT |  | 13    | 3.6E-2  | 2.7E-1    |

| Annotation Cluster 60    |               | Enrichment Score: 1.64                                                  | G  |    | Count | P_Value | Benjamini |
|--------------------------|---------------|-------------------------------------------------------------------------|----|---------------------------------------------------------------------------------------|-------|---------|-----------|
| <input type="checkbox"/> | BIOCARTA      | <a href="#">Cyclins and Cell Cycle Regulation</a>                       | RT |      | 13    | 3.6E-5  | 1.0E-2    |
| <input type="checkbox"/> | BIOCARTA      | <a href="#">Cell Cycle</a>                                              | RT |      | 13    | 5.7E-5  | 8.0E-3    |
| <input type="checkbox"/> | BIOCARTA      | <a href="#">p53 Signaling Pathway</a>                                   | RT |      | 10    | 9.5E-5  | 9.0E-3    |
| <input type="checkbox"/> | GOTERM_CC_ALL | <a href="#">cyclin-dependent protein kinase holoenzyme complex</a>      | RT |      | 6     | 2.7E-4  | 4.7E-3    |
| <input type="checkbox"/> | KEGG_PATHWAY  | <a href="#">Bladder cancer</a>                                          | RT |      | 12    | 1.4E-2  | 2.3E-1    |
| <input type="checkbox"/> | KEGG_PATHWAY  | <a href="#">Small cell lung cancer</a>                                  | RT |      | 19    | 2.3E-2  | 2.9E-1    |
| <input type="checkbox"/> | BIOCARTA      | <a href="#">Influence of Ras and Rho proteins on G1 to S Transition</a> | RT |      | 9     | 2.4E-2  | 4.9E-1    |
| <input type="checkbox"/> | KEGG_PATHWAY  | <a href="#">Chronic myeloid leukemia</a>                                | RT |      | 14    | 1.1E-1  | 6.5E-1    |
| <input type="checkbox"/> | KEGG_PATHWAY  | <a href="#">Glioma</a>                                                  | RT |      | 11    | 1.8E-1  | 7.9E-1    |
| <input type="checkbox"/> | KEGG_PATHWAY  | <a href="#">Prostate cancer</a>                                         | RT |      | 15    | 1.9E-1  | 7.9E-1    |
| <input type="checkbox"/> | KEGG_PATHWAY  | <a href="#">Non-small cell lung cancer</a>                              | RT |      | 10    | 2.1E-1  | 7.7E-1    |
| <input type="checkbox"/> | KEGG_PATHWAY  | <a href="#">Pancreatic cancer</a>                                       | RT |      | 12    | 2.5E-1  | 8.2E-1    |
| <input type="checkbox"/> | KEGG_PATHWAY  | <a href="#">Thyroid cancer</a>                                          | RT |      | 6     | 2.7E-1  | 8.2E-1    |
| <input type="checkbox"/> | KEGG_PATHWAY  | <a href="#">Melanoma</a>                                                | RT |      | 10    | 4.8E-1  | 9.4E-1    |
| <input type="checkbox"/> | KEGG_PATHWAY  | <a href="#">Endometrial cancer</a>                                      | RT |      | 7     | 6.0E-1  | 9.6E-1    |
| <input type="checkbox"/> | KEGG_PATHWAY  | <a href="#">Acute myeloid leukemia</a>                                  | RT |      | 6     | 8.6E-1  | 1.0E0     |
| Annotation Cluster 61    |               | Enrichment Score: 1.64                                                  | G  |    | Count | P_Value | Benjamini |
| <input type="checkbox"/> | GOTERM_BP_ALL | <a href="#">nucleobase biosynthetic process</a>                         | RT |      | 5     | 4.0E-3  | 1.5E-1    |
| <input type="checkbox"/> | GOTERM_BP_ALL | <a href="#">nucleobase metabolic process</a>                            | RT |      | 7     | 4.7E-3  | 1.6E-1    |
| <input type="checkbox"/> | GOTERM_BP_ALL | <a href="#">pyrimidine base metabolic process</a>                       | RT |      | 4     | 4.5E-2  | 6.5E-1    |
| <input type="checkbox"/> | GOTERM_BP_ALL | <a href="#">'de novo' pyrimidine base biosynthetic process</a>          | RT |      | 3     | 7.3E-2  | 7.7E-1    |
| <input type="checkbox"/> | GOTERM_BP_ALL | <a href="#">pyrimidine base biosynthetic process</a>                    | RT |      | 3     | 1.0E-1  | 8.4E-1    |
| Annotation Cluster 62    |               | Enrichment Score: 1.59                                                  | G  |   | Count | P_Value | Benjamini |
| <input type="checkbox"/> | GOTERM_BP_ALL | <a href="#">viral reproductive process</a>                              | RT |    | 9     | 6.7E-5  | 5.5E-3    |
| <input type="checkbox"/> | GOTERM_BP_ALL | <a href="#">viral reproduction</a>                                      | RT |    | 9     | 2.7E-4  | 1.7E-2    |
| <input type="checkbox"/> | GOTERM_BP_ALL | <a href="#">viral infectious cycle</a>                                  | RT |    | 7     | 6.5E-4  | 3.4E-2    |
| <input type="checkbox"/> | GOTERM_BP_ALL | <a href="#">interaction with host</a>                                   | RT |    | 3     | 7.3E-2  | 7.7E-1    |
| <input type="checkbox"/> | GOTERM_BP_ALL | <a href="#">viral genome replication</a>                                | RT |    | 3     | 7.3E-2  | 7.7E-1    |
| <input type="checkbox"/> | GOTERM_BP_ALL | <a href="#">interspecies interaction between organisms</a>              | RT |    | 3     | 2.8E-1  | 9.8E-1    |
| <input type="checkbox"/> | GOTERM_BP_ALL | <a href="#">symbiosis, encompassing mutualism through parasitism</a>    | RT |    | 3     | 2.8E-1  | 9.8E-1    |
| <input type="checkbox"/> | GOTERM_BP_ALL | <a href="#">reproductive process</a>                                    | RT |    | 17    | 9.4E-1  | 1.0E0     |
| <input type="checkbox"/> | GOTERM_BP_ALL | <a href="#">multi-organism process</a>                                  | RT |    | 8     | 1.0E0   | 1.0E0     |
| Annotation Cluster 63    |               | Enrichment Score: 1.59                                                  | G  |  | Count | P_Value | Benjamini |
| <input type="checkbox"/> | GOTERM_CC_ALL | <a href="#">cell cortex</a>                                             | RT |    | 12    | 8.0E-3  | 9.6E-2    |
| <input type="checkbox"/> | GOTERM_CC_ALL | <a href="#">cortical cytoskeleton</a>                                   | RT |    | 7     | 1.1E-2  | 1.3E-1    |
| <input type="checkbox"/> | GOTERM_CC_ALL | <a href="#">cell cortex part</a>                                        | RT |    | 9     | 1.3E-2  | 1.4E-1    |
| <input type="checkbox"/> | GOTERM_CC_ALL | <a href="#">cell division site part</a>                                 | RT |    | 4     | 2.9E-2  | 2.4E-1    |
| <input type="checkbox"/> | GOTERM_CC_ALL | <a href="#">cell division site</a>                                      | RT |    | 4     | 2.9E-2  | 2.4E-1    |
| <input type="checkbox"/> | GOTERM_CC_ALL | <a href="#">contractile ring</a>                                        | RT |    | 3     | 6.8E-2  | 4.2E-1    |
| <input type="checkbox"/> | GOTERM_CC_ALL | <a href="#">cortical actin cytoskeleton</a>                             | RT |    | 4     | 1.1E-1  | 5.5E-1    |
| Annotation Cluster 64    |               | Enrichment Score: 1.57                                                  | G  |  | Count | P_Value | Benjamini |
| <input type="checkbox"/> | GOTERM_BP_ALL | <a href="#">nucleobase, nucleoside and nucleotide metabolic process</a> | RT |    | 44    | 2.6E-6  | 3.5E-4    |
| <input type="checkbox"/> | GOTERM_BP_ALL | <a href="#">nucleotide metabolic process</a>                            | RT |    | 39    | 4.2E-5  | 3.8E-3    |
| <input type="checkbox"/> | GOTERM_BP_ALL | <a href="#">nucleotide biosynthetic process</a>                         | RT |    | 30    | 4.7E-5  | 4.1E-3    |
| <input type="checkbox"/> | GOTERM_BP_ALL | <a href="#">purine nucleotide biosynthetic process</a>                  | RT |    | 20    | 1.2E-4  | 8.8E-3    |
| <input type="checkbox"/> | GOTERM_BP_ALL | <a href="#">purine nucleotide metabolic process</a>                     | RT |    | 21    | 2.1E-4  | 1.4E-2    |
| <input type="checkbox"/> | GOTERM_BP_ALL | <a href="#">ribonucleotide metabolic process</a>                        | RT |    | 20    | 4.4E-4  | 2.5E-2    |

|                          |                 |                                                                                         |                    |  |    |        |        |
|--------------------------|-----------------|-----------------------------------------------------------------------------------------|--------------------|--|----|--------|--------|
| <input type="checkbox"/> | GOTERM_CC_ALL   | <a href="#">proton-transporting two-sector ATPase complex, catalytic domain</a>         | <a href="#">RT</a> |  | 6  | 5.5E-4 | 9.1E-3 |
| <input type="checkbox"/> | GOTERM_BP_ALL   | <a href="#">ribonucleotide biosynthetic process</a>                                     | <a href="#">RT</a> |  | 18 | 6.6E-4 | 3.4E-2 |
| <input type="checkbox"/> | GOTERM_BP_ALL   | <a href="#">nucleoside triphosphate metabolic process</a>                               | <a href="#">RT</a> |  | 17 | 1.0E-3 | 5.0E-2 |
| <input type="checkbox"/> | GOTERM_CC_ALL   | <a href="#">proton-transporting ATP synthase complex, catalytic core F(1)</a>           | <a href="#">RT</a> |  | 5  | 3.5E-3 | 4.7E-2 |
| <input type="checkbox"/> | GOTERM_BP_ALL   | <a href="#">nucleoside triphosphate biosynthetic process</a>                            | <a href="#">RT</a> |  | 14 | 4.4E-3 | 1.5E-1 |
| <input type="checkbox"/> | GOTERM_BP_ALL   | <a href="#">purine ribonucleotide biosynthetic process</a>                              | <a href="#">RT</a> |  | 15 | 5.0E-3 | 1.6E-1 |
| <input type="checkbox"/> | GOTERM_BP_ALL   | <a href="#">purine ribonucleotide metabolic process</a>                                 | <a href="#">RT</a> |  | 16 | 5.5E-3 | 1.8E-1 |
| <input type="checkbox"/> | GOTERM_BP_ALL   | <a href="#">ribonucleoside triphosphate metabolic process</a>                           | <a href="#">RT</a> |  | 14 | 5.9E-3 | 1.9E-1 |
| <input type="checkbox"/> | SP_PIR_KEYWORDS | <a href="#">cf(1)</a>                                                                   | <a href="#">RT</a> |  | 4  | 1.3E-2 | 1.5E-1 |
| <input type="checkbox"/> | GOTERM_BP_ALL   | <a href="#">coenzyme metabolic process</a>                                              | <a href="#">RT</a> |  | 27 | 1.5E-2 | 3.6E-1 |
| <input type="checkbox"/> | GOTERM_BP_ALL   | <a href="#">ribonucleoside triphosphate biosynthetic process</a>                        | <a href="#">RT</a> |  | 12 | 1.8E-2 | 4.1E-1 |
| <input type="checkbox"/> | GOTERM_BP_ALL   | <a href="#">cofactor metabolic process</a>                                              | <a href="#">RT</a> |  | 31 | 2.2E-2 | 4.6E-1 |
| <input type="checkbox"/> | GOTERM_BP_ALL   | <a href="#">purine ribonucleoside triphosphate metabolic process</a>                    | <a href="#">RT</a> |  | 12 | 2.8E-2 | 5.2E-1 |
| <input type="checkbox"/> | GOTERM_CC_ALL   | <a href="#">proton-transporting ATP synthase complex</a>                                | <a href="#">RT</a> |  | 6  | 3.0E-2 | 2.4E-1 |
| <input type="checkbox"/> | GOTERM_BP_ALL   | <a href="#">purine nucleoside triphosphate metabolic process</a>                        | <a href="#">RT</a> |  | 12 | 3.5E-2 | 5.8E-1 |
| <input type="checkbox"/> | GOTERM_BP_ALL   | <a href="#">purine nucleoside triphosphate biosynthetic process</a>                     | <a href="#">RT</a> |  | 11 | 3.8E-2 | 6.0E-1 |
| <input type="checkbox"/> | GOTERM_BP_ALL   | <a href="#">purine ribonucleoside triphosphate biosynthetic process</a>                 | <a href="#">RT</a> |  | 11 | 3.8E-2 | 6.0E-1 |
| <input type="checkbox"/> | GOTERM_BP_ALL   | <a href="#">coenzyme biosynthetic process</a>                                           | <a href="#">RT</a> |  | 16 | 4.0E-2 | 6.1E-1 |
| <input type="checkbox"/> | GOTERM_BP_ALL   | <a href="#">cofactor biosynthetic process</a>                                           | <a href="#">RT</a> |  | 18 | 4.0E-2 | 6.2E-1 |
| <input type="checkbox"/> | SP_PIR_KEYWORDS | <a href="#">hydrogen ion transport</a>                                                  | <a href="#">RT</a> |  | 9  | 4.5E-2 | 3.7E-1 |
| <input type="checkbox"/> | SP_PIR_KEYWORDS | <a href="#">ATP synthesis</a>                                                           | <a href="#">RT</a> |  | 6  | 8.5E-2 | 5.4E-1 |
| <input type="checkbox"/> | GOTERM_MF_ALL   | <a href="#">primary active transmembrane transporter activity</a>                       | <a href="#">RT</a> |  | 20 | 9.3E-2 | 8.9E-1 |
| <input type="checkbox"/> | GOTERM_MF_ALL   | <a href="#">P-P-bond-hydrolysis-driven transmembrane transporter activity</a>           | <a href="#">RT</a> |  | 20 | 9.3E-2 | 8.9E-1 |
| <input type="checkbox"/> | GOTERM_BP_ALL   | <a href="#">ATP synthesis coupled proton transport</a>                                  | <a href="#">RT</a> |  | 8  | 1.0E-1 | 8.4E-1 |
| <input type="checkbox"/> | GOTERM_BP_ALL   | <a href="#">ATP metabolic process</a>                                                   | <a href="#">RT</a> |  | 9  | 1.1E-1 | 8.6E-1 |
| <input type="checkbox"/> | GOTERM_MF_ALL   | <a href="#">hydrogen ion transporting ATP synthase activity, rotational mechanism</a>   | <a href="#">RT</a> |  | 8  | 1.2E-1 | 9.4E-1 |
| <input type="checkbox"/> | GOTERM_MF_ALL   | <a href="#">hydrogen ion transporting ATPase activity, rotational mechanism</a>         | <a href="#">RT</a> |  | 8  | 1.4E-1 | 9.5E-1 |
| <input type="checkbox"/> | GOTERM_BP_ALL   | <a href="#">proton transport</a>                                                        | <a href="#">RT</a> |  | 11 | 1.4E-1 | 9.0E-1 |
| <input type="checkbox"/> | GOTERM_MF_ALL   | <a href="#">cation-transporting ATPase activity</a>                                     | <a href="#">RT</a> |  | 9  | 1.5E-1 | 9.6E-1 |
| <input type="checkbox"/> | GOTERM_BP_ALL   | <a href="#">ATP biosynthetic process</a>                                                | <a href="#">RT</a> |  | 8  | 1.5E-1 | 9.1E-1 |
| <input type="checkbox"/> | GOTERM_BP_ALL   | <a href="#">nucleoside phosphate metabolic process</a>                                  | <a href="#">RT</a> |  | 8  | 1.5E-1 | 9.1E-1 |
| <input type="checkbox"/> | GOTERM_CC_ALL   | <a href="#">proton-transporting two-sector ATPase complex</a>                           | <a href="#">RT</a> |  | 8  | 1.6E-1 | 6.8E-1 |
| <input type="checkbox"/> | GOTERM_BP_ALL   | <a href="#">hydrogen transport</a>                                                      | <a href="#">RT</a> |  | 11 | 1.9E-1 | 9.5E-1 |
| <input type="checkbox"/> | KEGG_PATHWAY    | <a href="#">Oxidative phosphorylation</a>                                               | <a href="#">RT</a> |  | 17 | 2.6E-1 | 8.2E-1 |
| <input type="checkbox"/> | GOTERM_MF_ALL   | <a href="#">inorganic cation transmembrane transporter activity</a>                     | <a href="#">RT</a> |  | 17 | 2.8E-1 | 9.9E-1 |
| <input type="checkbox"/> | GOTERM_BP_ALL   | <a href="#">oxidative phosphorylation</a>                                               | <a href="#">RT</a> |  | 8  | 3.2E-1 | 9.9E-1 |
| <input type="checkbox"/> | GOTERM_MF_ALL   | <a href="#">ATPase activity, coupled to transmembrane movement of substances</a>        | <a href="#">RT</a> |  | 15 | 3.7E-1 | 1.0E0  |
| <input type="checkbox"/> | GOTERM_MF_ALL   | <a href="#">ATPase activity, coupled to movement of substances</a>                      | <a href="#">RT</a> |  | 15 | 3.7E-1 | 1.0E0  |
| <input type="checkbox"/> | GOTERM_MF_ALL   | <a href="#">active transmembrane transporter activity</a>                               | <a href="#">RT</a> |  | 35 | 3.7E-1 | 1.0E0  |
| <input type="checkbox"/> | GOTERM_MF_ALL   | <a href="#">ATPase activity, coupled to transmembrane movement of ions</a>              | <a href="#">RT</a> |  | 11 | 3.9E-1 | 1.0E0  |
| <input type="checkbox"/> | GOTERM_MF_ALL   | <a href="#">hydrogen ion transmembrane transporter activity</a>                         | <a href="#">RT</a> |  | 12 | 3.9E-1 | 1.0E0  |
| <input type="checkbox"/> | GOTERM_MF_ALL   | <a href="#">hydrolase activity, acting on acid anhydrides, catalyzing transmembrane</a> | <a href="#">RT</a> |  | 15 | 4.0E-1 | 1.0E0  |

| <input type="checkbox"/> | GOTERM_MF_ALL         | <a href="#">movement of substances</a>                                                                    |          |  |  |  |       |         |           |  |
|--------------------------|-----------------------|-----------------------------------------------------------------------------------------------------------|----------|--|--|--|-------|---------|-----------|--|
| <input type="checkbox"/> | GOTERM_MF_ALL         | <a href="#">monovalent inorganic cation transmembrane transporter activity</a>                            | RT       |  |  |  | 12    | 4.4E-1  | 1.0E0     |  |
| <input type="checkbox"/> | GOTERM_MF_ALL         | <a href="#">hydrogen-exporting ATPase activity, phosphorylative mechanism</a>                             | RT       |  |  |  | 3     | 7.0E-1  | 1.0E0     |  |
| <input type="checkbox"/> | GOTERM_MF_ALL         | <a href="#">ATPase activity, coupled to transmembrane movement of ions, phosphorylative mechanism</a>     | RT       |  |  |  | 6     | 7.4E-1  | 1.0E0     |  |
| <input type="checkbox"/> | GOTERM_BP_ALL         | <a href="#">monovalent inorganic cation transport</a>                                                     | RT       |  |  |  | 17    | 1.0E0   | 1.0E0     |  |
|                          | Annotation Cluster 65 | Enrichment Score: 1.54                                                                                    | <b>G</b> |  |  |  | Count | P_Value | Benjamini |  |
| <input type="checkbox"/> | KEGG_PATHWAY          | <a href="#">One carbon pool by folate</a>                                                                 | RT       |  |  |  | 10    | 1.6E-5  | 8.3E-4    |  |
| <input type="checkbox"/> | SP_PIR_KEYWORDS       | <a href="#">one-carbon metabolism</a>                                                                     | RT       |  |  |  | 7     | 9.5E-4  | 1.8E-2    |  |
| <input type="checkbox"/> | GOTERM_BP_ALL         | <a href="#">amino acid biosynthetic process</a>                                                           | RT       |  |  |  | 12    | 3.5E-3  | 1.4E-1    |  |
| <input type="checkbox"/> | GOTERM_BP_ALL         | <a href="#">folic acid and derivative biosynthetic process</a>                                            | RT       |  |  |  | 5     | 4.0E-3  | 1.5E-1    |  |
| <input type="checkbox"/> | GOTERM_MF_ALL         | <a href="#">hydrolase activity, acting on carbon-nitrogen (but not peptide) bonds, in cyclic amidines</a> | RT       |  |  |  | 8     | 7.4E-3  | 2.9E-1    |  |
| <input type="checkbox"/> | GOTERM_MF_ALL         | <a href="#">oxidoreductase activity, acting on the CH-NH group of donors, NAD or NADP as acceptor</a>     | RT       |  |  |  | 6     | 8.8E-3  | 3.2E-1    |  |
| <input type="checkbox"/> | SP_PIR_KEYWORDS       | <a href="#">amino-acid biosynthesis</a>                                                                   | RT       |  |  |  | 7     | 9.8E-3  | 1.3E-1    |  |
| <input type="checkbox"/> | KEGG_PATHWAY          | <a href="#">Glyoxylate and dicarboxylate metabolism</a>                                                   | RT       |  |  |  | 6     | 2.1E-2  | 2.9E-1    |  |
| <input type="checkbox"/> | INTERPRO              | <a href="#">Tetrahydrofolate dehydrogenase/cyclohydrolase</a>                                             | RT       |  |  |  | 3     | 2.2E-2  | 9.6E-1    |  |
| <input type="checkbox"/> | GOTERM_MF_ALL         | <a href="#">methenyltetrahydrofolate cyclohydrolase activity</a>                                          | RT       |  |  |  | 3     | 2.4E-2  | 5.8E-1    |  |
| <input type="checkbox"/> | GOTERM_MF_ALL         | <a href="#">methylenetetrahydrofolate dehydrogenase (NADP+) activity</a>                                  | RT       |  |  |  | 3     | 2.4E-2  | 5.8E-1    |  |
| <input type="checkbox"/> | GOTERM_MF_ALL         | <a href="#">methylenetetrahydrofolate dehydrogenase activity</a>                                          | RT       |  |  |  | 3     | 2.4E-2  | 5.8E-1    |  |
| <input type="checkbox"/> | GOTERM_BP_ALL         | <a href="#">folic acid and derivative metabolic process</a>                                               | RT       |  |  |  | 5     | 2.8E-2  | 5.2E-1    |  |
| <input type="checkbox"/> | GOTERM_BP_ALL         | <a href="#">methionine biosynthetic process</a>                                                           | RT       |  |  |  | 4     | 4.5E-2  | 6.5E-1    |  |
| <input type="checkbox"/> | GOTERM_BP_ALL         | <a href="#">methionine metabolic process</a>                                                              | RT       |  |  |  | 4     | 4.5E-2  | 6.5E-1    |  |
| <input type="checkbox"/> | GOTERM_BP_ALL         | <a href="#">histidine family amino acid biosynthetic process</a>                                          | RT       |  |  |  | 3     | 4.7E-2  | 6.5E-1    |  |
| <input type="checkbox"/> | GOTERM_BP_ALL         | <a href="#">histidine biosynthetic process</a>                                                            | RT       |  |  |  | 3     | 4.7E-2  | 6.5E-1    |  |
| <input type="checkbox"/> | GOTERM_BP_ALL         | <a href="#">aspartate family amino acid biosynthetic process</a>                                          | RT       |  |  |  | 5     | 5.7E-2  | 7.2E-1    |  |
| <input type="checkbox"/> | GOTERM_MF_ALL         | <a href="#">oxidoreductase activity, acting on the CH-NH group of donors</a>                              | RT       |  |  |  | 6     | 7.3E-2  | 8.5E-1    |  |
| <input type="checkbox"/> | GOTERM_BP_ALL         | <a href="#">aspartate family amino acid metabolic process</a>                                             | RT       |  |  |  | 5     | 8.2E-2  | 7.9E-1    |  |
| <input type="checkbox"/> | GOTERM_BP_ALL         | <a href="#">sulfur amino acid biosynthetic process</a>                                                    | RT       |  |  |  | 4     | 1.2E-1  | 8.7E-1    |  |
| <input type="checkbox"/> | COG_ONTOLOGY          | <a href="#">Coenzyme metabolism</a>                                                                       | RT       |  |  |  | 7     | 1.6E-1  | 9.3E-1    |  |
| <input type="checkbox"/> | GOTERM_BP_ALL         | <a href="#">histidine family amino acid metabolic process</a>                                             | RT       |  |  |  | 4     | 1.6E-1  | 9.3E-1    |  |
| <input type="checkbox"/> | GOTERM_BP_ALL         | <a href="#">histidine metabolic process</a>                                                               | RT       |  |  |  | 4     | 1.6E-1  | 9.3E-1    |  |
| <input type="checkbox"/> | GOTERM_BP_ALL         | <a href="#">sulfur amino acid metabolic process</a>                                                       | RT       |  |  |  | 4     | 2.6E-1  | 9.8E-1    |  |
| <input type="checkbox"/> | GOTERM_BP_ALL         | <a href="#">sulfur compound biosynthetic process</a>                                                      | RT       |  |  |  | 5     | 5.8E-1  | 1.0E0     |  |
| <input type="checkbox"/> | GOTERM_BP_ALL         | <a href="#">sulfur metabolic process</a>                                                                  | RT       |  |  |  | 7     | 7.9E-1  | 1.0E0     |  |
|                          | Annotation Cluster 66 | Enrichment Score: 1.52                                                                                    | <b>G</b> |  |  |  | Count | P_Value | Benjamini |  |
| <input type="checkbox"/> | GOTERM_BP_ALL         | <a href="#">negative regulation of DNA replication</a>                                                    | RT       |  |  |  | 5     | 6.6E-3  | 2.0E-1    |  |
| <input type="checkbox"/> | GOTERM_BP_ALL         | <a href="#">regulation of DNA replication</a>                                                             | RT       |  |  |  | 6     | 9.8E-3  | 2.8E-1    |  |
| <input type="checkbox"/> | GOTERM_BP_ALL         | <a href="#">negative regulation of DNA metabolic process</a>                                              | RT       |  |  |  | 5     | 4.6E-2  | 6.5E-1    |  |
| <input type="checkbox"/> | GOTERM_BP_ALL         | <a href="#">DNA integrity checkpoint</a>                                                                  | RT       |  |  |  | 6     | 7.9E-2  | 7.8E-1    |  |
| <input type="checkbox"/> | GOTERM_BP_ALL         | <a href="#">regulation of DNA metabolic process</a>                                                       | RT       |  |  |  | 6     | 1.0E-1  | 8.4E-1    |  |
|                          | Annotation Cluster 67 | Enrichment Score: 1.51                                                                                    | <b>G</b> |  |  |  | Count | P_Value | Benjamini |  |
| <input type="checkbox"/> | GOTERM_BP_ALL         | <a href="#">nucleobase metabolic process</a>                                                              | RT       |  |  |  | 7     | 4.7E-3  | 1.6E-1    |  |
| <input type="checkbox"/> | INTERPRO              | <a href="#">Phosphoribosyltransferase</a>                                                                 | RT       |  |  |  | 4     | 6.7E-2  | 1.0E0     |  |
| <input type="checkbox"/> | INTERPRO              | <a href="#">Purine/pyrimidine phosphoribosyl</a>                                                          | RT       |  |  |  | 2     | 0.2E-2  | 1.0E0     |  |

|                                                       |                             |                                                                                                       |                    |  | Count | P_Value | Benjamini |
|-------------------------------------------------------|-----------------------------|-------------------------------------------------------------------------------------------------------|--------------------|--|-------|---------|-----------|
|                                                       | <a href="#">transferase</a> |                                                                                                       |                    |  | 3     | 3.2E-2  | 1.0E0     |
| Annotation Cluster 68 Enrichment Score: 1.48 <b>G</b> |                             |                                                                                                       |                    |  |       |         |           |
| <input type="checkbox"/>                              | GOTERM_MF_ALL               | <a href="#">nucleotidyltransferase activity</a>                                                       | <a href="#">RT</a> |  | 23    | 8.7E-4  | 6.3E-2    |
| <input type="checkbox"/>                              | GOTERM_MF_ALL               | <a href="#">DNA-directed DNA polymerase activity</a>                                                  | <a href="#">RT</a> |  | 8     | 1.4E-2  | 4.3E-1    |
| <input type="checkbox"/>                              | KEGG_PATHWAY                | <a href="#">DNA polymerase</a>                                                                        | <a href="#">RT</a> |  | 8     | 1.8E-2  | 2.7E-1    |
| <input type="checkbox"/>                              | SP_PIR_KEYWORDS             | <a href="#">Nucleotidyltransferase</a>                                                                | <a href="#">RT</a> |  | 13    | 2.8E-2  | 2.7E-1    |
| <input type="checkbox"/>                              | SP_PIR_KEYWORDS             | <a href="#">DNA-directed DNA polymerase</a>                                                           | <a href="#">RT</a> |  | 6     | 3.2E-2  | 2.9E-1    |
| <input type="checkbox"/>                              | INTERPRO                    | <a href="#">DNA polymerase, B region</a>                                                              | <a href="#">RT</a> |  | 3     | 4.2E-2  | 9.9E-1    |
| <input type="checkbox"/>                              | INTERPRO                    | <a href="#">DNA polymerase B, exonuclease</a>                                                         | <a href="#">RT</a> |  | 3     | 4.2E-2  | 9.9E-1    |
| <input type="checkbox"/>                              | SMART                       | <a href="#">POLBc</a>                                                                                 | <a href="#">RT</a> |  | 3     | 6.6E-2  | 9.1E-1    |
| <input type="checkbox"/>                              | INTERPRO                    | <a href="#">DNA-directed DNA polymerase B</a>                                                         | <a href="#">RT</a> |  | 3     | 9.2E-2  | 1.0E0     |
| <input type="checkbox"/>                              | UP_SEQ_FEATURE              | zinc finger region:C4-type                                                                            | <a href="#">RT</a> |  | 8     | 1.5E-1  | 1.0E0     |
| <input type="checkbox"/>                              | GOTERM_MF_ALL               | <a href="#">3'-5' exonuclease activity</a>                                                            | <a href="#">RT</a> |  | 5     | 1.9E-1  | 9.8E-1    |
| Annotation Cluster 69 Enrichment Score: 1.47 <b>G</b> |                             |                                                                                                       |                    |  |       |         |           |
| <input type="checkbox"/>                              | INTERPRO                    | <a href="#">Heat shock protein Hsp70</a>                                                              | <a href="#">RT</a> |  | 5     | 1.7E-2  | 9.5E-1    |
| <input type="checkbox"/>                              | INTERPRO                    | <a href="#">Heat shock protein 70</a>                                                                 | <a href="#">RT</a> |  | 5     | 2.3E-2  | 9.6E-1    |
| <input type="checkbox"/>                              | SP_PIR_KEYWORDS             | <a href="#">stress response</a>                                                                       | <a href="#">RT</a> |  | 9     | 5.7E-2  | 4.3E-1    |
| <input type="checkbox"/>                              | PIR_SUPERFAMILY             | PIRSF002581:chaperone HSP70                                                                           | <a href="#">RT</a> |  | 4     | 6.2E-2  | 1.0E0     |
| Annotation Cluster 70 Enrichment Score: 1.46 <b>G</b> |                             |                                                                                                       |                    |  |       |         |           |
| <input type="checkbox"/>                              | SMART                       | <a href="#">HELICc</a>                                                                                | <a href="#">RT</a> |  | 16    | 1.2E-3  | 1.1E-1    |
| <input type="checkbox"/>                              | SMART                       | <a href="#">DEXDc</a>                                                                                 | <a href="#">RT</a> |  | 17    | 1.8E-3  | 1.4E-1    |
| <input type="checkbox"/>                              | GOTERM_MF_ALL               | <a href="#">helicase activity</a>                                                                     | <a href="#">RT</a> |  | 24    | 3.2E-3  | 1.5E-1    |
| <input type="checkbox"/>                              | SP_PIR_KEYWORDS             | <a href="#">helicase</a>                                                                              | <a href="#">RT</a> |  | 19    | 1.4E-2  | 1.6E-1    |
| <input type="checkbox"/>                              | INTERPRO                    | <a href="#">RNA helicase, DEAD-box type, Q motif</a>                                                  | <a href="#">RT</a> |  | 8     | 1.7E-2  | 9.6E-1    |
| <input type="checkbox"/>                              | INTERPRO                    | <a href="#">DNA/RNA helicase, C-terminal</a>                                                          | <a href="#">RT</a> |  | 14    | 2.1E-2  | 9.7E-1    |
| <input type="checkbox"/>                              | INTERPRO                    | <a href="#">DEAD-like helicase, N-terminal</a>                                                        | <a href="#">RT</a> |  | 14    | 4.2E-2  | 9.8E-1    |
| <input type="checkbox"/>                              | UP_SEQ_FEATURE              | domain:Helicase ATP-binding                                                                           | <a href="#">RT</a> |  | 11    | 4.4E-2  | 1.0E0     |
| <input type="checkbox"/>                              | INTERPRO                    | <a href="#">Helicase, superfamily 1 and 2, ATP-binding</a>                                            | <a href="#">RT</a> |  | 13    | 5.6E-2  | 9.9E-1    |
| <input type="checkbox"/>                              | INTERPRO                    | <a href="#">DNA/RNA helicase, DEAD/DEAH box type, N-terminal</a>                                      | <a href="#">RT</a> |  | 9     | 5.8E-2  | 9.9E-1    |
| <input type="checkbox"/>                              | UP_SEQ_FEATURE              | domain:Helicase C-terminal                                                                            | <a href="#">RT</a> |  | 10    | 7.0E-2  | 1.0E0     |
| <input type="checkbox"/>                              | GOTERM_MF_ALL               | <a href="#">ATP-dependent helicase activity</a>                                                       | <a href="#">RT</a> |  | 15    | 8.2E-2  | 8.7E-1    |
| <input type="checkbox"/>                              | UP_SEQ_FEATURE              | short sequence motif:Q motif                                                                          | <a href="#">RT</a> |  | 6     | 1.4E-1  | 1.0E0     |
| <input type="checkbox"/>                              | INTERPRO                    | <a href="#">RNA helicase, ATP-dependent, DEAD-box type</a>                                            | <a href="#">RT</a> |  | 5     | 2.3E-1  | 1.0E0     |
| <input type="checkbox"/>                              | INTERPRO                    | <a href="#">SNF2-related</a>                                                                          | <a href="#">RT</a> |  | 5     | 2.3E-1  | 1.0E0     |
| <input type="checkbox"/>                              | UP_SEQ_FEATURE              | short sequence motif:DEAD box                                                                         | <a href="#">RT</a> |  | 4     | 4.6E-1  | 1.0E0     |
| Annotation Cluster 71 Enrichment Score: 1.43 <b>G</b> |                             |                                                                                                       |                    |  |       |         |           |
| <input type="checkbox"/>                              | GOTERM_MF_ALL               | <a href="#">oxidoreductase activity, acting on the CH-CH group of donors, NAD or NADP as acceptor</a> | <a href="#">RT</a> |  | 7     | 1.4E-3  | 8.9E-2    |
| <input type="checkbox"/>                              | GOTERM_MF_ALL               | <a href="#">oxidoreductase activity, acting on the CH-CH group of donors</a>                          | <a href="#">RT</a> |  | 8     | 8.5E-2  | 8.8E-1    |
| <input type="checkbox"/>                              | INTERPRO                    | <a href="#">Alcohol dehydrogenase, zinc-binding</a>                                                   | <a href="#">RT</a> |  | 3     | 4.2E-1  | 1.0E0     |
| Annotation Cluster 72 Enrichment Score: 1.42 <b>G</b> |                             |                                                                                                       |                    |  |       |         |           |
| <input type="checkbox"/>                              | UP_SEQ_FEATURE              | domain:GST-like                                                                                       | <a href="#">RT</a> |  | 3     | 3.0E-2  | 1.0E0     |
| <input type="checkbox"/>                              | INTERPRO                    | <a href="#">Glutathione S-transferase, C-terminal-like</a>                                            | <a href="#">RT</a> |  | 6     | 3.3E-2  | 9.8E-1    |
| <input type="checkbox"/>                              | INTERPRO                    | <a href="#">Glutathione S-transferase, C-terminal</a>                                                 | <a href="#">RT</a> |  | 6     | 5.5E-2  | 9.9E-1    |
| Annotation Cluster 73 Enrichment Score: 1.41 <b>G</b> |                             |                                                                                                       |                    |  |       |         |           |
| <input type="checkbox"/>                              | GOTERM_BP_ALL               | <a href="#">deoxyribonucleotide metabolic process</a>                                                 | <a href="#">RT</a> |  | 6     | 4.9E-3  | 1.6E-1    |
| <input type="checkbox"/>                              | GOTERM_BP_ALL               | <a href="#">deoxyribonucleoside diphosphate metabolic process</a>                                     | <a href="#">RT</a> |  | 3     | 7.3E-2  | 7.7E-1    |
| <input type="checkbox"/>                              | GOTERM_BP_ALL               | <a href="#">nucleoside diphosphate metabolic process</a>                                              | <a href="#">RT</a> |  | 4     | 1.6E-1  | 9.3E-1    |
| Annotation Cluster 74 Enrichment Score: 1.4 <b>G</b>  |                             |                                                                                                       |                    |  |       |         |           |

|                          |                       |                                                                             |                    |  |       |         |           |
|--------------------------|-----------------------|-----------------------------------------------------------------------------|--------------------|--|-------|---------|-----------|
| <input type="checkbox"/> | GOTERM_BP_ALL         | <a href="#">glutamine family amino acid metabolic process</a>               | <a href="#">RT</a> |  | 9     | 1.9E-2  | 4.3E-1    |
| <input type="checkbox"/> | GOTERM_BP_ALL         | <a href="#">glutamine metabolic process</a>                                 | <a href="#">RT</a> |  | 6     | 2.8E-2  | 5.2E-1    |
| <input type="checkbox"/> | SP_PIR_KEYWORDS       | <a href="#">Glutamine amidotransferase</a>                                  | <a href="#">RT</a> |  | 4     | 5.7E-2  | 4.3E-1    |
| <input type="checkbox"/> | INTERPRO              | <a href="#">Glutamine amidotransferase, class-II</a>                        | <a href="#">RT</a> |  | 4     | 8.3E-2  | 1.0E0     |
|                          | Annotation Cluster 75 | Enrichment Score: 1.37                                                      | <b>G</b>           |  | Count | P_Value | Benjamini |
| <input type="checkbox"/> | GOTERM_BP_ALL         | <a href="#">pyrimidine nucleotide biosynthetic process</a>                  | <a href="#">RT</a> |  | 10    | 5.7E-5  | 4.9E-3    |
| <input type="checkbox"/> | GOTERM_BP_ALL         | <a href="#">pyrimidine nucleotide metabolic process</a>                     | <a href="#">RT</a> |  | 11    | 6.7E-5  | 5.5E-3    |
| <input type="checkbox"/> | GOTERM_BP_ALL         | <a href="#">pyrimidine nucleoside triphosphate metabolic process</a>        | <a href="#">RT</a> |  | 7     | 3.4E-3  | 1.3E-1    |
| <input type="checkbox"/> | GOTERM_MF_ALL         | <a href="#">nucleobase, nucleoside, nucleotide kinase activity</a>          | <a href="#">RT</a> |  | 9     | 2.3E-2  | 5.9E-1    |
| <input type="checkbox"/> | GOTERM_BP_ALL         | <a href="#">pyrimidine ribonucleotide biosynthetic process</a>              | <a href="#">RT</a> |  | 5     | 2.8E-2  | 5.2E-1    |
| <input type="checkbox"/> | SMART                 | <a href="#">NDK</a>                                                         | <a href="#">RT</a> |  | 4     | 3.2E-2  | 7.6E-1    |
| <input type="checkbox"/> | GOTERM_BP_ALL         | <a href="#">pyrimidine ribonucleotide metabolic process</a>                 | <a href="#">RT</a> |  | 5     | 3.6E-2  | 5.9E-1    |
| <input type="checkbox"/> | INTERPRO              | <a href="#">Nucleoside diphosphate kinase, core</a>                         | <a href="#">RT</a> |  | 4     | 5.2E-2  | 9.9E-1    |
| <input type="checkbox"/> | GOTERM_MF_ALL         | <a href="#">phosphotransferase activity, phosphate group as acceptor</a>    | <a href="#">RT</a> |  | 7     | 5.9E-2  | 8.3E-1    |
| <input type="checkbox"/> | GOTERM_BP_ALL         | <a href="#">CTP biosynthetic process</a>                                    | <a href="#">RT</a> |  | 4     | 7.7E-2  | 7.7E-1    |
| <input type="checkbox"/> | GOTERM_BP_ALL         | <a href="#">CTP metabolic process</a>                                       | <a href="#">RT</a> |  | 4     | 7.7E-2  | 7.7E-1    |
| <input type="checkbox"/> | GOTERM_BP_ALL         | <a href="#">pyrimidine ribonucleoside triphosphate metabolic process</a>    | <a href="#">RT</a> |  | 4     | 7.7E-2  | 7.7E-1    |
| <input type="checkbox"/> | GOTERM_BP_ALL         | <a href="#">pyrimidine ribonucleoside triphosphate biosynthetic process</a> | <a href="#">RT</a> |  | 4     | 7.7E-2  | 7.7E-1    |
| <input type="checkbox"/> | UP_SEQ_FEATURE        | active site:Pros-phosphohistidine intermediate                              | <a href="#">RT</a> |  | 3     | 1.6E-1  | 1.0E0     |
| <input type="checkbox"/> | SP_PIR_KEYWORDS       | <a href="#">Nucleotide metabolism</a>                                       | <a href="#">RT</a> |  | 4     | 2.3E-1  | 8.4E-1    |
| <input type="checkbox"/> | GOTERM_MF_ALL         | <a href="#">nucleoside diphosphate kinase activity</a>                      | <a href="#">RT</a> |  | 3     | 2.3E-1  | 9.9E-1    |
| <input type="checkbox"/> | GOTERM_BP_ALL         | <a href="#">UTP metabolic process</a>                                       | <a href="#">RT</a> |  | 3     | 2.4E-1  | 9.7E-1    |
| <input type="checkbox"/> | GOTERM_BP_ALL         | <a href="#">UTP biosynthetic process</a>                                    | <a href="#">RT</a> |  | 3     | 2.4E-1  | 9.7E-1    |
| <input type="checkbox"/> | GOTERM_BP_ALL         | <a href="#">GTP metabolic process</a>                                       | <a href="#">RT</a> |  | 3     | 2.4E-1  | 9.7E-1    |
| <input type="checkbox"/> | GOTERM_BP_ALL         | <a href="#">GTP biosynthetic process</a>                                    | <a href="#">RT</a> |  | 3     | 2.4E-1  | 9.7E-1    |
| <input type="checkbox"/> | GOTERM_MF_ALL         | <a href="#">nucleotide kinase activity</a>                                  | <a href="#">RT</a> |  | 3     | 5.0E-1  | 1.0E0     |
|                          | Annotation Cluster 76 | Enrichment Score: 1.36                                                      | <b>G</b>           |  | Count | P_Value | Benjamini |
| <input type="checkbox"/> | GOTERM_BP_ALL         | <a href="#">glucose catabolic process</a>                                   | <a href="#">RT</a> |  | 14    | 5.1E-3  | 1.7E-1    |
| <input type="checkbox"/> | GOTERM_BP_ALL         | <a href="#">monosaccharide catabolic process</a>                            | <a href="#">RT</a> |  | 14    | 5.9E-3  | 1.9E-1    |
| <input type="checkbox"/> | GOTERM_BP_ALL         | <a href="#">hexose catabolic process</a>                                    | <a href="#">RT</a> |  | 14    | 5.9E-3  | 1.9E-1    |
| <input type="checkbox"/> | GOTERM_BP_ALL         | <a href="#">alcohol catabolic process</a>                                   | <a href="#">RT</a> |  | 14    | 7.7E-3  | 2.3E-1    |
| <input type="checkbox"/> | GOTERM_BP_ALL         | <a href="#">glycolysis</a>                                                  | <a href="#">RT</a> |  | 12    | 1.2E-2  | 3.2E-1    |
| <input type="checkbox"/> | GOTERM_BP_ALL         | <a href="#">cellular carbohydrate catabolic process</a>                     | <a href="#">RT</a> |  | 14    | 2.9E-2  | 5.3E-1    |
| <input type="checkbox"/> | GOTERM_BP_ALL         | <a href="#">hexose metabolic process</a>                                    | <a href="#">RT</a> |  | 22    | 4.1E-2  | 6.3E-1    |
| <input type="checkbox"/> | GOTERM_BP_ALL         | <a href="#">carbohydrate catabolic process</a>                              | <a href="#">RT</a> |  | 14    | 4.2E-2  | 6.2E-1    |
| <input type="checkbox"/> | GOTERM_BP_ALL         | <a href="#">monosaccharide metabolic process</a>                            | <a href="#">RT</a> |  | 22    | 4.7E-2  | 6.5E-1    |
| <input type="checkbox"/> | GOTERM_BP_ALL         | <a href="#">glucose metabolic process</a>                                   | <a href="#">RT</a> |  | 17    | 5.9E-2  | 7.2E-1    |
| <input type="checkbox"/> | SP_PIR_KEYWORDS       | <a href="#">glycolysis</a>                                                  | <a href="#">RT</a> |  | 8     | 8.7E-2  | 5.4E-1    |
| <input type="checkbox"/> | GOTERM_BP_ALL         | <a href="#">cellular carbohydrate metabolic process</a>                     | <a href="#">RT</a> |  | 31    | 2.7E-1  | 9.8E-1    |
| <input type="checkbox"/> | SP_PIR_KEYWORDS       | <a href="#">gluconeogenesis</a>                                             | <a href="#">RT</a> |  | 3     | 3.0E-1  | 9.0E-1    |
| <input type="checkbox"/> | KEGG_PATHWAY          | <a href="#">Glycolysis / Gluconeogenesis</a>                                | <a href="#">RT</a> |  | 8     | 4.9E-1  | 9.4E-1    |
| <input type="checkbox"/> | GOTERM_BP_ALL         | <a href="#">carbohydrate metabolic process</a>                              | <a href="#">RT</a> |  | 40    | 5.1E-1  | 1.0E0     |
|                          | Annotation Cluster 77 | Enrichment Score: 1.36                                                      | <b>G</b>           |  | Count | P_Value | Benjamini |
| <input type="checkbox"/> | GOTERM_CC_ALL         | <a href="#">heterochromatin</a>                                             | <a href="#">RT</a> |  | 11    | 2.0E-3  | 2.9E-2    |
| <input type="checkbox"/> | GOTERM_CC_ALL         | <a href="#">nuclear heterochromatin</a>                                     | <a href="#">RT</a> |  | 5     | 1.5E-1  | 6.6E-1    |
| <input type="checkbox"/> | GOTERM_CC_ALL         | <a href="#">nuclear chromatin</a>                                           | <a href="#">RT</a> |  | 5     | 2.9E-1  | 8.3E-1    |



| Annotation Cluster 78    |                 | Enrichment Score: 1.36                                                              | G  |    | Count | P_Value | Benjamini |
|--------------------------|-----------------|-------------------------------------------------------------------------------------|----|---------------------------------------------------------------------------------------|-------|---------|-----------|
| <input type="checkbox"/> | GOTERM_BP_ALL   | <a href="#">one-carbon compound metabolic process</a>                               | RT |      | 23    | 2.6E-5  | 2.6E-3    |
| <input type="checkbox"/> | GOTERM_BP_ALL   | <a href="#">biopolymer methylation</a>                                              | RT |      | 11    | 2.7E-2  | 5.2E-1    |
| <input type="checkbox"/> | GOTERM_BP_ALL   | <a href="#">methylation</a>                                                         | RT |      | 11    | 3.8E-2  | 6.0E-1    |
| <input type="checkbox"/> | GOTERM_BP_ALL   | <a href="#">DNA alkylation</a>                                                      | RT |      | 5     | 1.5E-1  | 9.1E-1    |
| <input type="checkbox"/> | GOTERM_BP_ALL   | <a href="#">DNA methylation</a>                                                     | RT |      | 5     | 1.5E-1  | 9.1E-1    |
| <input type="checkbox"/> | GOTERM_BP_ALL   | <a href="#">DNA modification</a>                                                    | RT |      | 5     | 2.0E-1  | 9.6E-1    |
| <input type="checkbox"/> | GOTERM_BP_ALL   | <a href="#">regulation of gene expression, epigenetic</a>                           | RT |      | 8     | 2.7E-1  | 9.8E-1    |
| <input type="checkbox"/> | GOTERM_BP_ALL   | <a href="#">gene silencing</a>                                                      | RT |      | 5     | 4.4E-1  | 1.0E0     |
| Annotation Cluster 79    |                 | Enrichment Score: 1.32                                                              | G  |    | Count | P_Value | Benjamini |
| <input type="checkbox"/> | SP_PIR_KEYWORDS | <a href="#">stress-induced protein</a>                                              | RT |      | 5     | 3.7E-3  | 5.3E-2    |
| <input type="checkbox"/> | SP_PIR_KEYWORDS | <a href="#">heat shock</a>                                                          | RT |      | 5     | 3.7E-3  | 5.3E-2    |
| <input type="checkbox"/> | GOTERM_BP_ALL   | <a href="#">response to protein stimulus</a>                                        | RT |      | 15    | 4.4E-3  | 1.6E-1    |
| <input type="checkbox"/> | GOTERM_BP_ALL   | <a href="#">response to unfolded protein</a>                                        | RT |      | 15    | 4.4E-3  | 1.6E-1    |
| <input type="checkbox"/> | PIR_SUPERFAMILY | PIRSF002583:heat shock protein, HSP90/HTPG types                                    | RT |      | 4     | 4.4E-3  | 9.4E-1    |
| <input type="checkbox"/> | SMART           | <a href="#">HATPase_c</a>                                                           | RT |      | 6     | 8.1E-3  | 3.6E-1    |
| <input type="checkbox"/> | INTERPRO        | <a href="#">Heat shock protein Hsp90</a>                                            | RT |      | 4     | 1.1E-2  | 9.0E-1    |
| <input type="checkbox"/> | SP_PIR_KEYWORDS | <a href="#">estrogen-induced protein</a>                                            | RT |      | 3     | 2.4E-2  | 2.5E-1    |
| <input type="checkbox"/> | GOTERM_MF_ALL   | <a href="#">TPR domain binding</a>                                                  | RT |      | 3     | 4.4E-2  | 7.5E-1    |
| <input type="checkbox"/> | INTERPRO        | <a href="#">ATP-binding region, ATPase-like</a>                                     | RT |      | 5     | 4.7E-2  | 9.9E-1    |
| <input type="checkbox"/> | SP_PIR_KEYWORDS | <a href="#">stress response</a>                                                     | RT |      | 9     | 5.7E-2  | 4.3E-1    |
| <input type="checkbox"/> | GOTERM_MF_ALL   | <a href="#">nitric-oxide synthase regulator activity</a>                            | RT |      | 3     | 7.0E-2  | 8.6E-1    |
| <input type="checkbox"/> | GOTERM_BP_ALL   | <a href="#">response to heat</a>                                                    | RT |      | 6     | 1.0E-1  | 8.4E-1    |
| <input type="checkbox"/> | GOTERM_BP_ALL   | <a href="#">response to temperature stimulus</a>                                    | RT |      | 8     | 1.0E-1  | 8.4E-1    |
| <input type="checkbox"/> | GOTERM_BP_ALL   | <a href="#">regulation of nitric oxide biosynthetic process</a>                     | RT |      | 4     | 1.2E-1  | 8.7E-1    |
| <input type="checkbox"/> | GOTERM_BP_ALL   | <a href="#">response to chemical stimulus</a>                                       | RT |    | 44    | 2.2E-1  | 9.7E-1    |
| <input type="checkbox"/> | GOTERM_BP_ALL   | <a href="#">positive regulation of nitric oxide biosynthetic process</a>            | RT |    | 3     | 2.4E-1  | 9.7E-1    |
| <input type="checkbox"/> | GOTERM_BP_ALL   | <a href="#">nitric oxide biosynthetic process</a>                                   | RT |    | 4     | 4.0E-1  | 1.0E0     |
| <input type="checkbox"/> | GOTERM_BP_ALL   | <a href="#">nitric oxide metabolic process</a>                                      | RT |    | 4     | 4.0E-1  | 1.0E0     |
| <input type="checkbox"/> | GOTERM_BP_ALL   | <a href="#">response to biotic stimulus</a>                                         | RT |    | 20    | 7.6E-1  | 1.0E0     |
| <input type="checkbox"/> | GOTERM_BP_ALL   | <a href="#">positive regulation of biosynthetic process</a>                         | RT |    | 5     | 9.1E-1  | 1.0E0     |
| Annotation Cluster 80    |                 | Enrichment Score: 1.32                                                              | G  |  | Count | P_Value | Benjamini |
| <input type="checkbox"/> | GOTERM_BP_ALL   | <a href="#">pyrimidine nucleoside triphosphate metabolic process</a>                | RT |    | 7     | 3.4E-3  | 1.3E-1    |
| <input type="checkbox"/> | GOTERM_BP_ALL   | <a href="#">deoxyribonucleotide metabolic process</a>                               | RT |    | 6     | 4.9E-3  | 1.6E-1    |
| <input type="checkbox"/> | GOTERM_BP_ALL   | <a href="#">pyrimidine deoxyribonucleotide metabolic process</a>                    | RT |    | 4     | 3.2E-2  | 5.6E-1    |
| <input type="checkbox"/> | GOTERM_BP_ALL   | <a href="#">pyrimidine nucleoside metabolic process</a>                             | RT |    | 4     | 6.0E-2  | 7.2E-1    |
| <input type="checkbox"/> | GOTERM_BP_ALL   | <a href="#">pyrimidine deoxyribonucleotide biosynthetic process</a>                 | RT |    | 3     | 7.3E-2  | 7.7E-1    |
| <input type="checkbox"/> | GOTERM_BP_ALL   | <a href="#">pyrimidine deoxyribonucleoside triphosphate metabolic process</a>       | RT |    | 3     | 1.0E-1  | 8.4E-1    |
| <input type="checkbox"/> | GOTERM_BP_ALL   | <a href="#">pyrimidine deoxyribonucleoside metabolic process</a>                    | RT |    | 3     | 1.0E-1  | 8.4E-1    |
| <input type="checkbox"/> | GOTERM_BP_ALL   | <a href="#">deoxyribonucleotide biosynthetic process</a>                            | RT |    | 3     | 1.0E-1  | 8.4E-1    |
| <input type="checkbox"/> | GOTERM_BP_ALL   | <a href="#">deoxyribonucleoside metabolic process</a>                               | RT |    | 3     | 1.3E-1  | 9.0E-1    |
| <input type="checkbox"/> | GOTERM_BP_ALL   | <a href="#">deoxyribonucleoside triphosphate metabolic process</a>                  | RT |    | 3     | 1.7E-1  | 9.3E-1    |
| Annotation Cluster 81    |                 | Enrichment Score: 1.31                                                              | G  |  | Count | P_Value | Benjamini |
| <input type="checkbox"/> | INTERPRO        | <a href="#">Glyceraldehyde 3-phosphate dehydrogenase</a>                            | RT |    | 4     | 1.8E-2  | 9.5E-1    |
| <input type="checkbox"/> | GOTERM_MF_ALL   | <a href="#">glyceraldehyde-3-phosphate dehydrogenase (phosphorylating) activity</a> | RT |    | 4     | 2.0E-2  | 5.4E-1    |
| <input type="checkbox"/> | GOTERM_MF_ALL   | <a href="#">glyceraldehyde-3-phosphate</a>                                          | RT |    | 4     | 2.0E-2  | 5.4E-1    |

| <input type="checkbox"/> |                       | <a href="#">dehydrogenase activity</a>                                                                          | <a href="#">RT</a> |  |  |  | 7     | 2.0E-2  | 3.4E-1    |
|--------------------------|-----------------------|-----------------------------------------------------------------------------------------------------------------|--------------------|--|--|--|-------|---------|-----------|
| <input type="checkbox"/> | GOTERM_MF_ALL         | <a href="#">NAD binding</a>                                                                                     | <a href="#">RT</a> |  |  |  | 7     | 3.8E-2  | 7.0E-1    |
| <input type="checkbox"/> | GOTERM_MF_ALL         | <a href="#">oxidoreductase activity, acting on the aldehyde or oxo group of donors, NAD or NADP as acceptor</a> | <a href="#">RT</a> |  |  |  | 6     | 1.5E-1  | 9.6E-1    |
| <input type="checkbox"/> | GOTERM_MF_ALL         | <a href="#">oxidoreductase activity, acting on the aldehyde or oxo group of donors</a>                          | <a href="#">RT</a> |  |  |  | 6     | 3.2E-1  | 1.0E0     |
|                          | Annotation Cluster 82 | Enrichment Score: 1.29                                                                                          | <b>G</b>           |  |  |  | Count | P_Value | Benjamini |
| <input type="checkbox"/> | GOTERM_BP_ALL         | <a href="#">cell cycle checkpoint</a>                                                                           | <a href="#">RT</a> |  |  |  | 11    | 2.1E-3  | 9.2E-2    |
| <input type="checkbox"/> | GOTERM_BP_ALL         | <a href="#">regulation of mitosis</a>                                                                           | <a href="#">RT</a> |  |  |  | 10    | 1.9E-2  | 4.3E-1    |
| <input type="checkbox"/> | GOTERM_BP_ALL         | <a href="#">DNA damage response, signal transduction</a>                                                        | <a href="#">RT</a> |  |  |  | 9     | 3.5E-2  | 5.8E-1    |
| <input type="checkbox"/> | BIOCARTA              | <a href="#">RB Tumor Suppressor/Checkpoint Signaling in response to DNA damage</a>                              | <a href="#">RT</a> |  |  |  | 5     | 4.6E-2  | 6.4E-1    |
| <input type="checkbox"/> | GOTERM_BP_ALL         | <a href="#">DNA integrity checkpoint</a>                                                                        | <a href="#">RT</a> |  |  |  | 6     | 7.9E-2  | 7.8E-1    |
| <input type="checkbox"/> | BIOCARTA              | <a href="#">Cell Cycle</a>                                                                                      | <a href="#">RT</a> |  |  |  | 6     | 1.6E-1  | 9.1E-1    |
| <input type="checkbox"/> | GOTERM_BP_ALL         | <a href="#">mitotic cell cycle checkpoint</a>                                                                   | <a href="#">RT</a> |  |  |  | 5     | 1.6E-1  | 9.3E-1    |
| <input type="checkbox"/> | GOTERM_BP_ALL         | <a href="#">DNA damage checkpoint</a>                                                                           | <a href="#">RT</a> |  |  |  | 4     | 3.4E-1  | 9.9E-1    |
|                          | Annotation Cluster 83 | Enrichment Score: 1.29                                                                                          | <b>G</b>           |  |  |  | Count | P_Value | Benjamini |
| <input type="checkbox"/> | GOTERM_CC_ALL         | <a href="#">cortical cytoskeleton</a>                                                                           | <a href="#">RT</a> |  |  |  | 7     | 1.1E-2  | 1.3E-1    |
| <input type="checkbox"/> | GOTERM_CC_ALL         | <a href="#">filamentous actin</a>                                                                               | <a href="#">RT</a> |  |  |  | 4     | 5.5E-2  | 3.6E-1    |
| <input type="checkbox"/> | GOTERM_CC_ALL         | <a href="#">actin filament</a>                                                                                  | <a href="#">RT</a> |  |  |  | 5     | 2.2E-1  | 7.7E-1    |
|                          | Annotation Cluster 84 | Enrichment Score: 1.27                                                                                          | <b>G</b>           |  |  |  | Count | P_Value | Benjamini |
| <input type="checkbox"/> | GOTERM_BP_ALL         | <a href="#">L-serine metabolic process</a>                                                                      | <a href="#">RT</a> |  |  |  | 4     | 2.2E-2  | 4.6E-1    |
| <input type="checkbox"/> | GOTERM_BP_ALL         | <a href="#">serine family amino acid metabolic process</a>                                                      | <a href="#">RT</a> |  |  |  | 6     | 2.8E-2  | 5.2E-1    |
| <input type="checkbox"/> | KEGG_PATHWAY          | <a href="#">Glycine, serine and threonine metabolism</a>                                                        | <a href="#">RT</a> |  |  |  | 8     | 2.6E-1  | 8.1E-1    |
|                          | Annotation Cluster 85 | Enrichment Score: 1.26                                                                                          | <b>G</b>           |  |  |  | Count | P_Value | Benjamini |
| <input type="checkbox"/> | GOTERM_CC_ALL         | <a href="#">mitochondrial inner membrane presequence translocase complex</a>                                    | <a href="#">RT</a> |  |  |  | 4     | 2.9E-2  | 2.4E-1    |
| <input type="checkbox"/> | GOTERM_CC_ALL         | <a href="#">mitochondrial intermembrane space</a>                                                               | <a href="#">RT</a> |  |  |  | 5     | 3.2E-2  | 2.5E-1    |
| <input type="checkbox"/> | GOTERM_MF_ALL         | <a href="#">macromolecule transmembrane transporter activity</a>                                                | <a href="#">RT</a> |  |  |  | 5     | 3.3E-2  | 6.7E-1    |
| <input type="checkbox"/> | GOTERM_MF_ALL         | <a href="#">P-P-bond-hydrolysis-driven protein transmembrane transporter activity</a>                           | <a href="#">RT</a> |  |  |  | 5     | 3.3E-2  | 6.7E-1    |
| <input type="checkbox"/> | GOTERM_MF_ALL         | <a href="#">protein transmembrane transporter activity</a>                                                      | <a href="#">RT</a> |  |  |  | 5     | 1.5E-1  | 9.6E-1    |
| <input type="checkbox"/> | GOTERM_CC_ALL         | <a href="#">organelle envelope lumen</a>                                                                        | <a href="#">RT</a> |  |  |  | 5     | 1.7E-1  | 6.9E-1    |
|                          | Annotation Cluster 86 | Enrichment Score: 1.26                                                                                          | <b>G</b>           |  |  |  | Count | P_Value | Benjamini |
| <input type="checkbox"/> | GOTERM_BP_ALL         | <a href="#">DNA damage response, signal transduction by p53 class mediator</a>                                  | <a href="#">RT</a> |  |  |  | 6     | 1.7E-2  | 4.0E-1    |
| <input type="checkbox"/> | GOTERM_BP_ALL         | <a href="#">DNA damage response, signal transduction</a>                                                        | <a href="#">RT</a> |  |  |  | 9     | 3.5E-2  | 5.8E-1    |
| <input type="checkbox"/> | GOTERM_BP_ALL         | <a href="#">induction of apoptosis by intracellular signals</a>                                                 | <a href="#">RT</a> |  |  |  | 7     | 6.5E-2  | 7.5E-1    |
| <input type="checkbox"/> | GOTERM_BP_ALL         | <a href="#">DNA damage response, signal transduction resulting in induction of apoptosis</a>                    | <a href="#">RT</a> |  |  |  | 4     | 2.4E-1  | 9.7E-1    |
|                          | Annotation Cluster 87 | Enrichment Score: 1.25                                                                                          | <b>G</b>           |  |  |  | Count | P_Value | Benjamini |
| <input type="checkbox"/> | SP_PIR_KEYWORDS       | <a href="#">purine biosynthesis</a>                                                                             | <a href="#">RT</a> |  |  |  | 7     | 3.4E-4  | 7.1E-3    |
| <input type="checkbox"/> | GOTERM_BP_ALL         | <a href="#">nucleoside monophosphate biosynthetic process</a>                                                   | <a href="#">RT</a> |  |  |  | 6     | 2.2E-2  | 4.6E-1    |
| <input type="checkbox"/> | GOTERM_BP_ALL         | <a href="#">nucleoside monophosphate metabolic process</a>                                                      | <a href="#">RT</a> |  |  |  | 6     | 2.8E-2  | 5.2E-1    |
| <input type="checkbox"/> | GOTERM_BP_ALL         | <a href="#">ribonucleoside monophosphate biosynthetic process</a>                                               | <a href="#">RT</a> |  |  |  | 5     | 5.7E-2  | 7.2E-1    |
| <input type="checkbox"/> | GOTERM_BP_ALL         | <a href="#">ribonucleoside monophosphate metabolic process</a>                                                  | <a href="#">RT</a> |  |  |  | 5     | 6.9E-2  | 7.6E-1    |
| <input type="checkbox"/> | GOTERM_BP_ALL         | <a href="#">purine nucleoside monophosphate biosynthetic process</a>                                            | <a href="#">RT</a> |  |  |  | 3     | 2.8E-1  | 9.8E-1    |
| <input type="checkbox"/> | GOTERM_BP_ALL         | <a href="#">purine ribonucleoside monophosphate biosynthetic process</a>                                        | <a href="#">RT</a> |  |  |  | 3     | 2.8E-1  | 9.8E-1    |
| <input type="checkbox"/> | GOTERM_BP_ALL         | <a href="#">purine nucleoside monophosphate metabolic process</a>                                               | <a href="#">RT</a> |  |  |  | 3     | 3.1E-1  | 9.9E-1    |

| <input type="checkbox"/> | GOTERM_BP_ALL         | <a href="#">purine ribonucleoside monophosphate metabolic process</a>                 | <a href="#">RT</a> |  |  |  |  | 3     | 3.1E-1  | 9.9E-1    |
|--------------------------|-----------------------|---------------------------------------------------------------------------------------|--------------------|--|--|--|--|-------|---------|-----------|
|                          | Annotation Cluster 88 | Enrichment Score: 1.24                                                                | <b>G</b>           |  |  |  |  | Count | P_Value | Benjamini |
| <input type="checkbox"/> | UP_SEQ_FEATURE        | domain:CH 2                                                                           | <a href="#">RT</a> |  |  |  |  | 7     | 1.3E-2  | 1.0E0     |
| <input type="checkbox"/> | UP_SEQ_FEATURE        | domain:CH 1                                                                           | <a href="#">RT</a> |  |  |  |  | 7     | 1.3E-2  | 1.0E0     |
| <input type="checkbox"/> | INTERPRO              | <a href="#">Actin-binding, actinin-type</a>                                           | <a href="#">RT</a> |  |  |  |  | 6     | 7.4E-2  | 1.0E0     |
| <input type="checkbox"/> | SMART                 | <a href="#">CH</a>                                                                    | <a href="#">RT</a> |  |  |  |  | 9     | 8.3E-2  | 9.4E-1    |
| <input type="checkbox"/> | UP_SEQ_FEATURE        | domain:Actin-binding                                                                  | <a href="#">RT</a> |  |  |  |  | 4     | 1.7E-1  | 1.0E0     |
| <input type="checkbox"/> | INTERPRO              | <a href="#">Calponin-like actin-binding</a>                                           | <a href="#">RT</a> |  |  |  |  | 9     | 1.8E-1  | 1.0E0     |
|                          | Annotation Cluster 89 | Enrichment Score: 1.24                                                                | <b>G</b>           |  |  |  |  | Count | P_Value | Benjamini |
| <input type="checkbox"/> | SP_PIR_KEYWORDS       | <a href="#">Mitochondrion</a>                                                         | <a href="#">RT</a> |  |  |  |  | 76    | 8.2E-3  | 1.1E-1    |
| <input type="checkbox"/> | UP_SEQ_FEATURE        | transit peptide:Mitochondrion                                                         | <a href="#">RT</a> |  |  |  |  | 34    | 1.3E-1  | 1.0E0     |
| <input type="checkbox"/> | SP_PIR_KEYWORDS       | <a href="#">transit peptide</a>                                                       | <a href="#">RT</a> |  |  |  |  | 41    | 1.8E-1  | 7.7E-1    |
|                          | Annotation Cluster 90 | Enrichment Score: 1.21                                                                | <b>G</b>           |  |  |  |  | Count | P_Value | Benjamini |
| <input type="checkbox"/> | GOTERM_BP_ALL         | <a href="#">protein depolymerization</a>                                              | <a href="#">RT</a> |  |  |  |  | 10    | 7.4E-3  | 2.2E-1    |
| <input type="checkbox"/> | GOTERM_BP_ALL         | <a href="#">regulation of actin polymerization and/or depolymerization</a>            | <a href="#">RT</a> |  |  |  |  | 10    | 1.0E-2  | 2.9E-1    |
| <input type="checkbox"/> | GOTERM_BP_ALL         | <a href="#">regulation of actin cytoskeleton organization and biogenesis</a>          | <a href="#">RT</a> |  |  |  |  | 10    | 1.2E-2  | 3.2E-1    |
| <input type="checkbox"/> | GOTERM_BP_ALL         | <a href="#">regulation of actin filament length</a>                                   | <a href="#">RT</a> |  |  |  |  | 10    | 1.2E-2  | 3.2E-1    |
| <input type="checkbox"/> | GOTERM_BP_ALL         | <a href="#">regulation of cellular component size</a>                                 | <a href="#">RT</a> |  |  |  |  | 10    | 1.4E-2  | 3.6E-1    |
| <input type="checkbox"/> | GOTERM_BP_ALL         | <a href="#">actin polymerization and/or depolymerization</a>                          | <a href="#">RT</a> |  |  |  |  | 11    | 1.6E-2  | 3.9E-1    |
| <input type="checkbox"/> | GOTERM_BP_ALL         | <a href="#">regulation of cytoskeleton organization and biogenesis</a>                | <a href="#">RT</a> |  |  |  |  | 10    | 2.2E-2  | 4.6E-1    |
| <input type="checkbox"/> | GOTERM_BP_ALL         | <a href="#">regulation of organelle organization and biogenesis</a>                   | <a href="#">RT</a> |  |  |  |  | 10    | 2.2E-2  | 4.6E-1    |
| <input type="checkbox"/> | GOTERM_BP_ALL         | <a href="#">actin filament depolymerization</a>                                       | <a href="#">RT</a> |  |  |  |  | 7     | 2.5E-2  | 5.0E-1    |
| <input type="checkbox"/> | GOTERM_BP_ALL         | <a href="#">regulation of actin filament depolymerization</a>                         | <a href="#">RT</a> |  |  |  |  | 7     | 2.5E-2  | 5.0E-1    |
| <input type="checkbox"/> | GOTERM_BP_ALL         | <a href="#">negative regulation of cellular component organization and biogenesis</a> | <a href="#">RT</a> |  |  |  |  | 9     | 3.5E-2  | 5.8E-1    |
| <input type="checkbox"/> | GOTERM_BP_ALL         | <a href="#">regulation of cellular component organization and biogenesis</a>          | <a href="#">RT</a> |  |  |  |  | 13    | 3.5E-2  | 5.8E-1    |
| <input type="checkbox"/> | GOTERM_BP_ALL         | <a href="#">actin filament capping</a>                                                | <a href="#">RT</a> |  |  |  |  | 6     | 5.9E-2  | 7.2E-1    |
| <input type="checkbox"/> | GOTERM_BP_ALL         | <a href="#">negative regulation of actin filament depolymerization</a>                | <a href="#">RT</a> |  |  |  |  | 6     | 5.9E-2  | 7.2E-1    |
| <input type="checkbox"/> | SMART                 | <a href="#">GEL</a>                                                                   | <a href="#">RT</a> |  |  |  |  | 3     | 1.1E-1  | 9.6E-1    |
| <input type="checkbox"/> | INTERPRO              | <a href="#">Gelsolin region</a>                                                       | <a href="#">RT</a> |  |  |  |  | 4     | 1.2E-1  | 1.0E0     |
| <input type="checkbox"/> | GOTERM_BP_ALL         | <a href="#">barbed-end actin filament capping</a>                                     | <a href="#">RT</a> |  |  |  |  | 5     | 1.5E-1  | 9.1E-1    |
| <input type="checkbox"/> | INTERPRO              | <a href="#">Gelsolin</a>                                                              | <a href="#">RT</a> |  |  |  |  | 3     | 1.5E-1  | 1.0E0     |
| <input type="checkbox"/> | GOTERM_BP_ALL         | <a href="#">actin filament polymerization</a>                                         | <a href="#">RT</a> |  |  |  |  | 5     | 1.8E-1  | 9.4E-1    |
| <input type="checkbox"/> | UP_SEQ_FEATURE        | repeat:Gelsolin-like 1                                                                | <a href="#">RT</a> |  |  |  |  | 3     | 2.0E-1  | 1.0E0     |
| <input type="checkbox"/> | UP_SEQ_FEATURE        | repeat:Gelsolin-like 2                                                                | <a href="#">RT</a> |  |  |  |  | 3     | 2.0E-1  | 1.0E0     |
| <input type="checkbox"/> | UP_SEQ_FEATURE        | repeat:Gelsolin-like 3                                                                | <a href="#">RT</a> |  |  |  |  | 3     | 2.0E-1  | 1.0E0     |
| <input type="checkbox"/> | GOTERM_BP_ALL         | <a href="#">negative regulation of protein metabolic process</a>                      | <a href="#">RT</a> |  |  |  |  | 12    | 2.0E-1  | 9.6E-1    |
| <input type="checkbox"/> | SP_PIR_KEYWORDS       | <a href="#">actin capping</a>                                                         | <a href="#">RT</a> |  |  |  |  | 4     | 2.3E-1  | 8.4E-1    |
| <input type="checkbox"/> | GOTERM_BP_ALL         | <a href="#">actin cytoskeleton organization and biogenesis</a>                        | <a href="#">RT</a> |  |  |  |  | 22    | 2.8E-1  | 9.8E-1    |
| <input type="checkbox"/> | GOTERM_BP_ALL         | <a href="#">actin filament-based process</a>                                          | <a href="#">RT</a> |  |  |  |  | 23    | 3.0E-1  | 9.8E-1    |
| <input type="checkbox"/> | GOTERM_BP_ALL         | <a href="#">regulation of protein metabolic process</a>                               | <a href="#">RT</a> |  |  |  |  | 30    | 3.3E-1  | 9.9E-1    |
|                          | Annotation Cluster 91 | Enrichment Score: 1.16                                                                | <b>G</b>           |  |  |  |  | Count | P_Value | Benjamini |
| <input type="checkbox"/> | GOTERM_BP_ALL         | <a href="#">establishment of organelle localization</a>                               | <a href="#">RT</a> |  |  |  |  | 8     | 1.3E-2  | 3.3E-1    |
| <input type="checkbox"/> | GOTERM_BP_ALL         | <a href="#">organelle localization</a>                                                | <a href="#">RT</a> |  |  |  |  | 9     | 2.3E-2  | 4.6E-1    |
| <input type="checkbox"/> | GOTERM_BP_ALL         | <a href="#">establishment of chromosome localization</a>                              | <a href="#">RT</a> |  |  |  |  | 3     | 1.0E-1  | 8.4E-1    |
| <input type="checkbox"/> | GOTERM_BP_ALL         | <a href="#">chromosome localization</a>                                               | <a href="#">RT</a> |  |  |  |  | 3     | 1.0E-1  | 8.4E-1    |
| <input type="checkbox"/> | GOTERM_BP_ALL         | <a href="#">positive regulation of progression through</a>                            | <a href="#">RT</a> |  |  |  |  | 2     | 5.1E-1  | 1.0E0     |

|                                              |                            |                                                                              |           |  | Count | P_Value | Benjamini |
|----------------------------------------------|----------------------------|------------------------------------------------------------------------------|-----------|--|-------|---------|-----------|
|                                              | <a href="#">cell cycle</a> |                                                                              | <b>G</b>  |  | 5     | 3.1E-1  | 1.0E0     |
| Annotation Cluster 92 Enrichment Score: 1.14 |                            |                                                                              |           |  |       |         |           |
| <input type="checkbox"/>                     | GOTERM_BP_ALL              | <a href="#">meiosis I</a>                                                    | <b>RT</b> |  | 8     | 1.3E-2  | 3.3E-1    |
| <input type="checkbox"/>                     | GOTERM_BP_ALL              | <a href="#">meiotic prophase I</a>                                           | <b>RT</b> |  | 3     | 1.7E-1  | 9.3E-1    |
| <input type="checkbox"/>                     | GOTERM_BP_ALL              | <a href="#">prophase</a>                                                     | <b>RT</b> |  | 3     | 1.7E-1  | 9.3E-1    |
| Annotation Cluster 93 Enrichment Score: 1.13 |                            |                                                                              |           |  |       |         |           |
| <input type="checkbox"/>                     | GOTERM_BP_ALL              | <a href="#">glutamine family amino acid metabolic process</a>                | <b>RT</b> |  | 9     | 1.9E-2  | 4.3E-1    |
| <input type="checkbox"/>                     | GOTERM_BP_ALL              | <a href="#">proline biosynthetic process</a>                                 | <b>RT</b> |  | 3     | 7.3E-2  | 7.7E-1    |
| <input type="checkbox"/>                     | GOTERM_BP_ALL              | <a href="#">proline metabolic process</a>                                    | <b>RT</b> |  | 3     | 1.3E-1  | 9.0E-1    |
| <input type="checkbox"/>                     | GOTERM_BP_ALL              | <a href="#">glutamine family amino acid biosynthetic process</a>             | <b>RT</b> |  | 4     | 1.6E-1  | 9.3E-1    |
| Annotation Cluster 94 Enrichment Score: 1.13 |                            |                                                                              |           |  |       |         |           |
| <input type="checkbox"/>                     | SMART                      | <a href="#">Sm</a>                                                           | <b>RT</b> |  | 6     | 1.0E-2  | 4.1E-1    |
| <input type="checkbox"/>                     | INTERPRO                   | <a href="#">Like-Sm ribonucleoprotein, eukaryotic and archaea-type, core</a> | <b>RT</b> |  | 6     | 2.2E-2  | 9.7E-1    |
| <input type="checkbox"/>                     | INTERPRO                   | <a href="#">Like-Sm ribonucleoprotein, core</a>                              | <b>RT</b> |  | 6     | 2.7E-2  | 9.7E-1    |
| <input type="checkbox"/>                     | GOTERM_BP_ALL              | <a href="#">mRNA catabolic process</a>                                       | <b>RT</b> |  | 6     | 1.8E-1  | 9.4E-1    |
| <input type="checkbox"/>                     | GOTERM_BP_ALL              | <a href="#">RNA catabolic process</a>                                        | <b>RT</b> |  | 6     | 2.8E-1  | 9.8E-1    |
| <input type="checkbox"/>                     | GOTERM_BP_ALL              | <a href="#">mRNA catabolic process, nonsense-mediated decay</a>              | <b>RT</b> |  | 3     | 5.7E-1  | 1.0E0     |
| Annotation Cluster 95 Enrichment Score: 1.12 |                            |                                                                              |           |  |       |         |           |
| <input type="checkbox"/>                     | GOTERM_MF_ALL              | <a href="#">nucleobase, nucleoside, nucleotide kinase activity</a>           | <b>RT</b> |  | 9     | 2.3E-2  | 5.9E-1    |
| <input type="checkbox"/>                     | GOTERM_MF_ALL              | <a href="#">deoxynucleoside kinase activity</a>                              | <b>RT</b> |  | 3     | 7.0E-2  | 8.6E-1    |
| <input type="checkbox"/>                     | GOTERM_MF_ALL              | <a href="#">nucleoside kinase activity</a>                                   | <b>RT</b> |  | 3     | 2.7E-1  | 9.9E-1    |
| Annotation Cluster 96 Enrichment Score: 1.12 |                            |                                                                              |           |  |       |         |           |
| <input type="checkbox"/>                     | SP_PIR_KEYWORDS            | <a href="#">actin-binding</a>                                                | <b>RT</b> |  | 26    | 1.8E-2  | 2.0E-1    |
| <input type="checkbox"/>                     | GOTERM_MF_ALL              | <a href="#">actin binding</a>                                                | <b>RT</b> |  | 34    | 5.6E-2  | 8.2E-1    |
| <input type="checkbox"/>                     | GOTERM_CC_ALL              | <a href="#">actin cytoskeleton</a>                                           | <b>RT</b> |  | 27    | 7.1E-2  | 4.2E-1    |
| <input type="checkbox"/>                     | GOTERM_MF_ALL              | <a href="#">cytoskeletal protein binding</a>                                 | <b>RT</b> |  | 45    | 7.8E-2  | 8.6E-1    |
| <input type="checkbox"/>                     | SP_PIR_KEYWORDS            | <a href="#">cytoskeleton</a>                                                 | <b>RT</b> |  | 30    | 4.5E-1  | 9.6E-1    |
| Annotation Cluster 97 Enrichment Score: 1.11 |                            |                                                                              |           |  |       |         |           |
| <input type="checkbox"/>                     | KEGG_PATHWAY               | <a href="#">Selenoamino acid metabolism</a>                                  | <b>RT</b> |  | 10    | 3.6E-3  | 9.0E-2    |
| <input type="checkbox"/>                     | KEGG_PATHWAY               | <a href="#">Aminophosphonate metabolism</a>                                  | <b>RT</b> |  | 7     | 4.2E-3  | 9.4E-2    |
| <input type="checkbox"/>                     | GOTERM_BP_ALL              | <a href="#">biopolymer methylation</a>                                       | <b>RT</b> |  | 11    | 2.7E-2  | 5.2E-1    |
| <input type="checkbox"/>                     | KEGG_PATHWAY               | <a href="#">Naphthalene and anthracene degradation</a>                       | <b>RT</b> |  | 6     | 3.6E-2  | 3.8E-1    |
| <input type="checkbox"/>                     | GOTERM_MF_ALL              | <a href="#">S-adenosylmethionine-dependent methyltransferase activity</a>    | <b>RT</b> |  | 13    | 3.6E-2  | 6.9E-1    |
| <input type="checkbox"/>                     | GOTERM_BP_ALL              | <a href="#">methylation</a>                                                  | <b>RT</b> |  | 11    | 3.8E-2  | 6.0E-1    |
| <input type="checkbox"/>                     | GOTERM_BP_ALL              | <a href="#">peptidyl-arginine methylation</a>                                | <b>RT</b> |  | 3     | 4.7E-2  | 6.5E-1    |
| <input type="checkbox"/>                     | KEGG_PATHWAY               | <a href="#">Tyrosine metabolism</a>                                          | <b>RT</b> |  | 11    | 5.7E-2  | 4.8E-1    |
| <input type="checkbox"/>                     | KEGG_PATHWAY               | <a href="#">Histidine metabolism</a>                                         | <b>RT</b> |  | 9     | 6.7E-2  | 4.9E-1    |
| <input type="checkbox"/>                     | GOTERM_MF_ALL              | <a href="#">arginine N-methyltransferase activity</a>                        | <b>RT</b> |  | 3     | 7.0E-2  | 8.6E-1    |
| <input type="checkbox"/>                     | GOTERM_MF_ALL              | <a href="#">protein-arginine N-methyltransferase activity</a>                | <b>RT</b> |  | 3     | 7.0E-2  | 8.6E-1    |
| <input type="checkbox"/>                     | GOTERM_MF_ALL              | <a href="#">histone-arginine N-methyltransferase activity</a>                | <b>RT</b> |  | 3     | 7.0E-2  | 8.6E-1    |
| <input type="checkbox"/>                     | GOTERM_BP_ALL              | <a href="#">peptidyl-arginine modification</a>                               | <b>RT</b> |  | 3     | 7.3E-2  | 7.7E-1    |
| <input type="checkbox"/>                     | PIRS_SUPERFAMILY           | PIRSF037127:type 1 arginine N-methyltransferase                              | <b>RT</b> |  | 3     | 9.1E-2  | 1.0E0     |
| <input type="checkbox"/>                     | UP_SEQ_FEATURE             | binding site:S-adenosyl-L-methionine                                         | <b>RT</b> |  | 4     | 1.7E-1  | 1.0E0     |
| <input type="checkbox"/>                     | GOTERM_BP_ALL              | <a href="#">protein amino acid methylation</a>                               | <b>RT</b> |  | 6     | 2.1E-1  | 9.6E-1    |
| <input type="checkbox"/>                     | GOTERM_BP_ALL              | <a href="#">protein amino acid alkylation</a>                                | <b>RT</b> |  | 6     | 2.1E-1  | 9.6E-1    |
| <input type="checkbox"/>                     | KEGG_PATHWAY               | <a href="#">Tryptophan metabolism</a>                                        | <b>RT</b> |  | 9     | 2.3E-1  | 7.9E-1    |
| <input type="checkbox"/>                     | GOTERM_MF_ALL              | <a href="#">histone methyltransferase activity</a>                           | <b>RT</b> |  | 5     | 2.3E-1  | 9.9E-1    |

| <input type="checkbox"/> | UP_SEQ_FEATURE         | binding site:S-adenosyl-L-methionine; via carbonyl oxygen                    | <a href="#">RT</a> |  |  |  | 3     | 2.8E-1  | 1.0E0     |  |
|--------------------------|------------------------|------------------------------------------------------------------------------|--------------------|--|--|--|-------|---------|-----------|--|
| <input type="checkbox"/> | GOTERM_MF_ALL          | <a href="#">protein methyltransferase activity</a>                           | <a href="#">RT</a> |  |  |  | 6     | 2.8E-1  | 9.9E-1    |  |
| <input type="checkbox"/> | GOTERM_MF_ALL          | <a href="#">N-methyltransferase activity</a>                                 | <a href="#">RT</a> |  |  |  | 6     | 3.0E-1  | 1.0E0     |  |
| <input type="checkbox"/> | KEGG_PATHWAY           | <a href="#">Androgen and estrogen metabolism</a>                             | <a href="#">RT</a> |  |  |  | 8     | 3.6E-1  | 8.8E-1    |  |
|                          | Annotation Cluster 98  | Enrichment Score: 1.07                                                       | <b>G</b>           |  |  |  | Count | P_Value | Benjamini |  |
| <input type="checkbox"/> | GOTERM_BP_ALL          | <a href="#">release of cytochrome c from mitochondria</a>                    | <a href="#">RT</a> |  |  |  | 8     | 6.6E-5  | 5.5E-3    |  |
| <input type="checkbox"/> | GOTERM_BP_ALL          | <a href="#">mitochondrial membrane organization and biogenesis</a>           | <a href="#">RT</a> |  |  |  | 10    | 8.9E-5  | 6.7E-3    |  |
| <input type="checkbox"/> | GOTERM_BP_ALL          | <a href="#">mitochondrion organization and biogenesis</a>                    | <a href="#">RT</a> |  |  |  | 17    | 2.4E-3  | 1.0E-1    |  |
| <input type="checkbox"/> | GOTERM_BP_ALL          | <a href="#">apoptotic mitochondrial changes</a>                              | <a href="#">RT</a> |  |  |  | 8     | 4.1E-3  | 1.5E-1    |  |
| <input type="checkbox"/> | GOTERM_BP_ALL          | <a href="#">caspase activation via cytochrome c</a>                          | <a href="#">RT</a> |  |  |  | 4     | 7.2E-3  | 2.2E-1    |  |
| <input type="checkbox"/> | GOTERM_BP_ALL          | <a href="#">regulation of caspase activity</a>                               | <a href="#">RT</a> |  |  |  | 10    | 1.7E-2  | 4.0E-1    |  |
| <input type="checkbox"/> | GOTERM_BP_ALL          | <a href="#">apoptotic program</a>                                            | <a href="#">RT</a> |  |  |  | 12    | 2.3E-2  | 4.6E-1    |  |
| <input type="checkbox"/> | GOTERM_BP_ALL          | <a href="#">caspase activation</a>                                           | <a href="#">RT</a> |  |  |  | 7     | 3.0E-2  | 5.4E-1    |  |
| <input type="checkbox"/> | BIOCARTA               | <a href="#">Apoptotic Signaling in Response to DNA Damage</a>                | <a href="#">RT</a> |  |  |  | 7     | 3.9E-2  | 6.1E-1    |  |
| <input type="checkbox"/> | GOTERM_BP_ALL          | <a href="#">positive regulation of caspase activity</a>                      | <a href="#">RT</a> |  |  |  | 7     | 5.7E-2  | 7.2E-1    |  |
| <input type="checkbox"/> | UP_SEQ_FEATURE         | short sequence motif: BH1                                                    | <a href="#">RT</a> |  |  |  | 4     | 5.8E-2  | 1.0E0     |  |
| <input type="checkbox"/> | UP_SEQ_FEATURE         | short sequence motif: BH2                                                    | <a href="#">RT</a> |  |  |  | 4     | 7.7E-2  | 1.0E0     |  |
| <input type="checkbox"/> | INTERPRO               | <a href="#">BCL2-like apoptosis inhibitor</a>                                | <a href="#">RT</a> |  |  |  | 4     | 1.0E-1  | 1.0E0     |  |
| <input type="checkbox"/> | GOTERM_BP_ALL          | <a href="#">regulation of mitochondrial membrane potential</a>               | <a href="#">RT</a> |  |  |  | 3     | 1.3E-1  | 9.0E-1    |  |
| <input type="checkbox"/> | GOTERM_BP_ALL          | <a href="#">positive regulation of hydrolase activity</a>                    | <a href="#">RT</a> |  |  |  | 7     | 1.7E-1  | 9.3E-1    |  |
| <input type="checkbox"/> | UP_SEQ_FEATURE         | short sequence motif: BH3                                                    | <a href="#">RT</a> |  |  |  | 4     | 1.7E-1  | 1.0E0     |  |
| <input type="checkbox"/> | BIOCARTA               | <a href="#">Caspase Cascade in Apoptosis</a>                                 | <a href="#">RT</a> |  |  |  | 6     | 1.8E-1  | 9.2E-1    |  |
| <input type="checkbox"/> | SMART                  | <a href="#">BCL</a>                                                          | <a href="#">RT</a> |  |  |  | 4     | 2.0E-1  | 9.9E-1    |  |
| <input type="checkbox"/> | BIOCARTA               | <a href="#">Stress Induction of HSP Regulation</a>                           | <a href="#">RT</a> |  |  |  | 4     | 2.4E-1  | 9.1E-1    |  |
| <input type="checkbox"/> | INTERPRO               | <a href="#">Apoptosis regulator Bcl-2, BH</a>                                | <a href="#">RT</a> |  |  |  | 4     | 2.6E-1  | 1.0E0     |  |
| <input type="checkbox"/> | BIOCARTA               | <a href="#">Role of Mitochondria in Apoptotic Signaling</a>                  | <a href="#">RT</a> |  |  |  | 5     | 3.3E-1  | 9.5E-1    |  |
| <input type="checkbox"/> | BIOCARTA               | <a href="#">Telomeres, Telomerase, Cellular Aging, and Immortality</a>       | <a href="#">RT</a> |  |  |  | 4     | 4.3E-1  | 9.7E-1    |  |
| <input type="checkbox"/> | BIOCARTA               | <a href="#">HIV-1 Nef</a>                                                    | <a href="#">RT</a> |  |  |  | 8     | 5.9E-1  | 9.7E-1    |  |
| <input type="checkbox"/> | KEGG_PATHWAY           | <a href="#">Amyotrophic lateral sclerosis (ALS)</a>                          | <a href="#">RT</a> |  |  |  | 3     | 6.8E-1  | 9.7E-1    |  |
| <input type="checkbox"/> | KEGG_PATHWAY           | <a href="#">Neurodegenerative Diseases</a>                                   | <a href="#">RT</a> |  |  |  | 5     | 6.8E-1  | 9.7E-1    |  |
| <input type="checkbox"/> | BIOCARTA               | <a href="#">Induction of apoptosis through DR3 and DR4/5 Death Receptors</a> | <a href="#">RT</a> |  |  |  | 4     | 7.6E-1  | 9.9E-1    |  |
| <input type="checkbox"/> | BIOCARTA               | <a href="#">Ceramide Signaling Pathway</a>                                   | <a href="#">RT</a> |  |  |  | 3     | 8.3E-1  | 9.9E-1    |  |
| <input type="checkbox"/> | GOTERM_BP_ALL          | <a href="#">positive regulation of catalytic activity</a>                    | <a href="#">RT</a> |  |  |  | 15    | 8.4E-1  | 1.0E0     |  |
| <input type="checkbox"/> | GOTERM_BP_ALL          | <a href="#">regulation of hydrolase activity</a>                             | <a href="#">RT</a> |  |  |  | 11    | 9.1E-1  | 1.0E0     |  |
| <input type="checkbox"/> | KEGG_PATHWAY           | <a href="#">Apoptosis</a>                                                    | <a href="#">RT</a> |  |  |  | 7     | 9.4E-1  | 1.0E0     |  |
| <input type="checkbox"/> | GOTERM_BP_ALL          | <a href="#">regulation of membrane potential</a>                             | <a href="#">RT</a> |  |  |  | 3     | 9.7E-1  | 1.0E0     |  |
|                          | Annotation Cluster 99  | Enrichment Score: 1.06                                                       | <b>G</b>           |  |  |  | Count | P_Value | Benjamini |  |
| <input type="checkbox"/> | GOTERM_MF_ALL          | <a href="#">pseudouridylate synthase activity</a>                            | <a href="#">RT</a> |  |  |  | 6     | 1.9E-3  | 1.0E-1    |  |
| <input type="checkbox"/> | GOTERM_BP_ALL          | <a href="#">tRNA modification</a>                                            | <a href="#">RT</a> |  |  |  | 4     | 4.5E-2  | 6.5E-1    |  |
| <input type="checkbox"/> | GOTERM_BP_ALL          | <a href="#">pseudouridine synthesis</a>                                      | <a href="#">RT</a> |  |  |  | 4     | 6.0E-2  | 7.2E-1    |  |
| <input type="checkbox"/> | GOTERM_BP_ALL          | <a href="#">RNA modification</a>                                             | <a href="#">RT</a> |  |  |  | 6     | 6.9E-2  | 7.6E-1    |  |
| <input type="checkbox"/> | GOTERM_BP_ALL          | <a href="#">tRNA pseudouridine synthesis</a>                                 | <a href="#">RT</a> |  |  |  | 3     | 7.3E-2  | 7.7E-1    |  |
| <input type="checkbox"/> | GOTERM_MF_ALL          | <a href="#">intramolecular transferase activity</a>                          | <a href="#">RT</a> |  |  |  | 5     | 4.0E-1  | 1.0E0     |  |
| <input type="checkbox"/> | GOTERM_MF_ALL          | <a href="#">tRNA-pseudouridine synthase activity</a>                         | <a href="#">RT</a> |  |  |  | 3     | 5.3E-1  | 1.0E0     |  |
| <input type="checkbox"/> | GOTERM_MF_ALL          | <a href="#">pseudouridine synthase activity</a>                              | <a href="#">RT</a> |  |  |  | 3     | 6.4E-1  | 1.0E0     |  |
|                          | Annotation Cluster 100 | Enrichment Score: 1.05                                                       | <b>G</b>           |  |  |  | Count | P_Value | Benjamini |  |

| <input type="checkbox"/> | GOTERM_MF_ALL          | <a href="#">steroid hormone receptor binding</a>                                    | RT       |  |  |  | 4     | 5.7E-2  | 8.2E-1    |
|--------------------------|------------------------|-------------------------------------------------------------------------------------|----------|--|--|--|-------|---------|-----------|
| <input type="checkbox"/> | GOTERM_MF_ALL          | <a href="#">hormone receptor binding</a>                                            | RT       |  |  |  | 6     | 7.3E-2  | 8.5E-1    |
| <input type="checkbox"/> | GOTERM_MF_ALL          | <a href="#">estrogen receptor binding</a>                                           | RT       |  |  |  | 3     | 9.8E-2  | 9.0E-1    |
| <input type="checkbox"/> | GOTERM_MF_ALL          | <a href="#">nuclear hormone receptor binding</a>                                    | RT       |  |  |  | 5     | 1.5E-1  | 9.6E-1    |
|                          | Annotation Cluster 101 | Enrichment Score: 1.04                                                              | <b>G</b> |  |  |  | Count | P_Value | Benjamini |
| <input type="checkbox"/> | GOTERM_CC_ALL          | <a href="#">virion</a>                                                              | RT       |  |  |  | 6     | 5.1E-2  | 3.4E-1    |
| <input type="checkbox"/> | GOTERM_CC_ALL          | <a href="#">virion part</a>                                                         | RT       |  |  |  | 6     | 5.1E-2  | 3.4E-1    |
| <input type="checkbox"/> | GOTERM_CC_ALL          | <a href="#">viral capsid</a>                                                        | RT       |  |  |  | 5     | 1.2E-1  | 5.8E-1    |
| <input type="checkbox"/> | INTERPRO               | <a href="#">ENV_polyprotein (coat polyprotein)</a>                                  | RT       |  |  |  | 3     | 2.2E-1  | 1.0E0     |
|                          | Annotation Cluster 102 | Enrichment Score: 1.03                                                              | <b>G</b> |  |  |  | Count | P_Value | Benjamini |
| <input type="checkbox"/> | SP_PIR_KEYWORDS        | <a href="#">pentosyltransferase</a>                                                 | RT       |  |  |  | 3     | 7.0E-2  | 4.9E-1    |
| <input type="checkbox"/> | SP_PIR_KEYWORDS        | <a href="#">salvage pathway</a>                                                     | RT       |  |  |  | 3     | 7.0E-2  | 4.9E-1    |
| <input type="checkbox"/> | GOTERM_BP_ALL          | <a href="#">purine nucleoside metabolic process</a>                                 | RT       |  |  |  | 3     | 1.7E-1  | 9.3E-1    |
|                          | Annotation Cluster 103 | Enrichment Score: 1.02                                                              | <b>G</b> |  |  |  | Count | P_Value | Benjamini |
| <input type="checkbox"/> | SMART                  | <a href="#">STI1</a>                                                                | RT       |  |  |  | 5     | 2.7E-3  | 1.9E-1    |
| <input type="checkbox"/> | INTERPRO               | <a href="#">Heat shock chaperonin-binding</a>                                       | RT       |  |  |  | 5     | 5.3E-3  | 7.9E-1    |
| <input type="checkbox"/> | UP_SEQ_FEATURE         | domain:UBA 2                                                                        | RT       |  |  |  | 3     | 8.7E-2  | 1.0E0     |
| <input type="checkbox"/> | UP_SEQ_FEATURE         | domain:UBA 1                                                                        | RT       |  |  |  | 3     | 8.7E-2  | 1.0E0     |
| <input type="checkbox"/> | UP_SEQ_FEATURE         | domain:Ubiquitin-like                                                               | RT       |  |  |  | 5     | 2.1E-1  | 1.0E0     |
| <input type="checkbox"/> | SMART                  | <a href="#">UBQ</a>                                                                 | RT       |  |  |  | 6     | 3.2E-1  | 1.0E0     |
| <input type="checkbox"/> | SMART                  | <a href="#">UBA</a>                                                                 | RT       |  |  |  | 4     | 3.4E-1  | 1.0E0     |
| <input type="checkbox"/> | INTERPRO               | <a href="#">Ubiquitin</a>                                                           | RT       |  |  |  | 6     | 4.2E-1  | 1.0E0     |
| <input type="checkbox"/> | INTERPRO               | <a href="#">Ubiquitin-associated/translation elongation factor EF1B, N-terminal</a> | RT       |  |  |  | 5     | 5.7E-1  | 1.0E0     |
|                          | Annotation Cluster 104 | Enrichment Score: 1.02                                                              | <b>G</b> |  |  |  | Count | P_Value | Benjamini |
| <input type="checkbox"/> | GOTERM_MF_ALL          | <a href="#">protein kinase C binding</a>                                            | RT       |  |  |  | 4     | 3.0E-2  | 6.5E-1    |
| <input type="checkbox"/> | GOTERM_MF_ALL          | <a href="#">enzyme binding</a>                                                      | RT       |  |  |  | 27    | 6.4E-2  | 8.5E-1    |
| <input type="checkbox"/> | GOTERM_MF_ALL          | <a href="#">kinase binding</a>                                                      | RT       |  |  |  | 11    | 2.0E-1  | 9.8E-1    |
| <input type="checkbox"/> | GOTERM_MF_ALL          | <a href="#">protein kinase binding</a>                                              | RT       |  |  |  | 10    | 2.1E-1  | 9.8E-1    |
|                          | Annotation Cluster 105 | Enrichment Score: 1.02                                                              | <b>G</b> |  |  |  | Count | P_Value | Benjamini |
| <input type="checkbox"/> | UP_SEQ_FEATURE         | domain:KH 3                                                                         | RT       |  |  |  | 4     | 4.2E-2  | 1.0E0     |
| <input type="checkbox"/> | SMART                  | <a href="#">KH</a>                                                                  | RT       |  |  |  | 6     | 7.3E-2  | 9.2E-1    |
| <input type="checkbox"/> | INTERPRO               | <a href="#">K Homology</a>                                                          | RT       |  |  |  | 6     | 1.2E-1  | 1.0E0     |
| <input type="checkbox"/> | UP_SEQ_FEATURE         | domain:KH 1                                                                         | RT       |  |  |  | 4     | 1.2E-1  | 1.0E0     |
| <input type="checkbox"/> | UP_SEQ_FEATURE         | domain:KH 2                                                                         | RT       |  |  |  | 4     | 1.2E-1  | 1.0E0     |
| <input type="checkbox"/> | INTERPRO               | <a href="#">K Homology, type 1</a>                                                  | RT       |  |  |  | 6     | 1.3E-1  | 1.0E0     |
|                          | Annotation Cluster 106 | Enrichment Score: 1.02                                                              | <b>G</b> |  |  |  | Count | P_Value | Benjamini |
| <input type="checkbox"/> | GOTERM_BP_ALL          | <a href="#">cellular macromolecule catabolic process</a>                            | RT       |  |  |  | 40    | 3.4E-3  | 1.3E-1    |
| <input type="checkbox"/> | GOTERM_BP_ALL          | <a href="#">macromolecule catabolic process</a>                                     | RT       |  |  |  | 42    | 5.9E-2  | 7.2E-1    |
| <input type="checkbox"/> | GOTERM_BP_ALL          | <a href="#">cellular catabolic process</a>                                          | RT       |  |  |  | 55    | 6.1E-2  | 7.2E-1    |
| <input type="checkbox"/> | GOTERM_BP_ALL          | <a href="#">ubiquitin-dependent protein catabolic process</a>                       | RT       |  |  |  | 20    | 7.3E-2  | 7.6E-1    |
| <input type="checkbox"/> | GOTERM_BP_ALL          | <a href="#">modification-dependent protein catabolic process</a>                    | RT       |  |  |  | 20    | 8.6E-2  | 8.0E-1    |
| <input type="checkbox"/> | GOTERM_BP_ALL          | <a href="#">modification-dependent macromolecule catabolic process</a>              | RT       |  |  |  | 20    | 8.6E-2  | 8.0E-1    |
| <input type="checkbox"/> | GOTERM_BP_ALL          | <a href="#">proteolysis involved in cellular protein catabolic process</a>          | RT       |  |  |  | 20    | 1.0E-1  | 8.4E-1    |
| <input type="checkbox"/> | GOTERM_BP_ALL          | <a href="#">cellular protein catabolic process</a>                                  | RT       |  |  |  | 20    | 1.1E-1  | 8.6E-1    |
| <input type="checkbox"/> | GOTERM_BP_ALL          | <a href="#">biopolymer catabolic process</a>                                        | RT       |  |  |  | 28    | 4.0E-1  | 1.0E0     |
| <input type="checkbox"/> | GOTERM_BP_ALL          | <a href="#">catabolic process</a>                                                   | RT       |  |  |  | 58    | 4.6E-1  | 1.0E0     |
| <input type="checkbox"/> | GOTERM_BP_ALL          | <a href="#">protein catabolic process</a>                                           | RT       |  |  |  | 21    | 4.6E-1  | 1.0E0     |
|                          | Annotation Cluster 107 | Enrichment Score: 1.01                                                              | <b>G</b> |  |  |  | Count | P_Value | Benjamini |
| <input type="checkbox"/> | GOTERM_MF_ALL          | <a href="#">dolichyl-diphosphooligosaccharide-protein</a>                           | RT       |  |  |  | 5     | 2.6E-2  | 1.6E-1    |

| <input type="checkbox"/> |                        | <a href="#">glycotransferase activity</a>                                                                                                                                     | <a href="#">RT</a> |  |    |        |         |           |  |
|--------------------------|------------------------|-------------------------------------------------------------------------------------------------------------------------------------------------------------------------------|--------------------|--|----|--------|---------|-----------|--|
| <input type="checkbox"/> | GOTERM_MF_ALL          | <a href="#">oligosaccharyl transferase activity</a>                                                                                                                           | <a href="#">RT</a> |  | 5  | 3.6E-3 | 1.6E-1  |           |  |
| <input type="checkbox"/> | GOTERM_BP_ALL          | <a href="#">protein amino acid N-linked glycosylation via asparagine</a>                                                                                                      | <a href="#">RT</a> |  | 5  | 1.0E-2 | 2.9E-1  |           |  |
| <input type="checkbox"/> | GOTERM_BP_ALL          | <a href="#">peptidyl-asparagine modification</a>                                                                                                                              | <a href="#">RT</a> |  | 5  | 1.0E-2 | 2.9E-1  |           |  |
| <input type="checkbox"/> | GOTERM_MF_ALL          | <a href="#">transferase activity, transferring pentosyl groups</a>                                                                                                            | <a href="#">RT</a> |  | 10 | 1.2E-2 | 4.1E-1  |           |  |
| <input type="checkbox"/> | GOTERM_BP_ALL          | <a href="#">protein amino acid N-linked glycosylation</a>                                                                                                                     | <a href="#">RT</a> |  | 6  | 6.9E-2 | 7.6E-1  |           |  |
| <input type="checkbox"/> | GOTERM_CC_ALL          | <a href="#">oligosaccharyl transferase complex</a>                                                                                                                            | <a href="#">RT</a> |  | 3  | 1.3E-1 | 6.0E-1  |           |  |
| <input type="checkbox"/> | GOTERM_MF_ALL          | <a href="#">transferase activity, transferring glycosyl groups</a>                                                                                                            | <a href="#">RT</a> |  | 28 | 1.3E-1 | 9.4E-1  |           |  |
| <input type="checkbox"/> | GOTERM_BP_ALL          | <a href="#">glycoprotein biosynthetic process</a>                                                                                                                             | <a href="#">RT</a> |  | 11 | 4.0E-1 | 1.0E0   |           |  |
| <input type="checkbox"/> | GOTERM_BP_ALL          | <a href="#">protein amino acid glycosylation</a>                                                                                                                              | <a href="#">RT</a> |  | 10 | 4.1E-1 | 1.0E0   |           |  |
| <input type="checkbox"/> | GOTERM_BP_ALL          | <a href="#">biopolymer glycosylation</a>                                                                                                                                      | <a href="#">RT</a> |  | 10 | 4.5E-1 | 1.0E0   |           |  |
| <input type="checkbox"/> | KEGG_PATHWAY           | <a href="#">Glycan structures - biosynthesis 1</a>                                                                                                                            | <a href="#">RT</a> |  | 14 | 5.1E-1 | 9.4E-1  |           |  |
| <input type="checkbox"/> | SP_PIR_KEYWORDS        | <a href="#">glycosyltransferase</a>                                                                                                                                           | <a href="#">RT</a> |  | 18 | 5.1E-1 | 9.8E-1  |           |  |
| <input type="checkbox"/> | KEGG_PATHWAY           | <a href="#">N-Glycan biosynthesis</a>                                                                                                                                         | <a href="#">RT</a> |  | 6  | 5.3E-1 | 9.4E-1  |           |  |
| <input type="checkbox"/> | GOTERM_MF_ALL          | <a href="#">transferase activity, transferring hexosyl groups</a>                                                                                                             | <a href="#">RT</a> |  | 15 | 5.4E-1 | 1.0E0   |           |  |
| <input type="checkbox"/> | GOTERM_BP_ALL          | <a href="#">glycoprotein metabolic process</a>                                                                                                                                | <a href="#">RT</a> |  | 12 | 5.5E-1 | 1.0E0   |           |  |
|                          | Annotation Cluster 108 | Enrichment Score: 0.99                                                                                                                                                        | <b>G</b>           |  |    | Count  | P_Value | Benjamini |  |
| <input type="checkbox"/> | GOTERM_BP_ALL          | <a href="#">interphase</a>                                                                                                                                                    | <a href="#">RT</a> |  | 11 | 4.7E-2 | 6.5E-1  |           |  |
| <input type="checkbox"/> | GOTERM_BP_ALL          | <a href="#">interphase of mitotic cell cycle</a>                                                                                                                              | <a href="#">RT</a> |  | 11 | 4.7E-2 | 6.5E-1  |           |  |
| <input type="checkbox"/> | GOTERM_BP_ALL          | <a href="#">S phase</a>                                                                                                                                                       | <a href="#">RT</a> |  | 4  | 9.6E-2 | 8.3E-1  |           |  |
| <input type="checkbox"/> | GOTERM_BP_ALL          | <a href="#">S phase of mitotic cell cycle</a>                                                                                                                                 | <a href="#">RT</a> |  | 4  | 9.6E-2 | 8.3E-1  |           |  |
| <input type="checkbox"/> | GOTERM_BP_ALL          | <a href="#">G1/S transition of mitotic cell cycle</a>                                                                                                                         | <a href="#">RT</a> |  | 4  | 5.5E-1 | 1.0E0   |           |  |
|                          | Annotation Cluster 109 | Enrichment Score: 0.97                                                                                                                                                        | <b>G</b>           |  |    | Count  | P_Value | Benjamini |  |
| <input type="checkbox"/> | GOTERM_BP_ALL          | <a href="#">maintenance of localization</a>                                                                                                                                   | <a href="#">RT</a> |  | 6  | 4.1E-2 | 6.2E-1  |           |  |
| <input type="checkbox"/> | GOTERM_BP_ALL          | <a href="#">maintenance of cellular localization</a>                                                                                                                          | <a href="#">RT</a> |  | 4  | 1.2E-1 | 8.7E-1  |           |  |
| <input type="checkbox"/> | GOTERM_BP_ALL          | <a href="#">maintenance of protein localization</a>                                                                                                                           | <a href="#">RT</a> |  | 4  | 1.2E-1 | 8.7E-1  |           |  |
| <input type="checkbox"/> | GOTERM_BP_ALL          | <a href="#">maintenance of cellular protein localization</a>                                                                                                                  | <a href="#">RT</a> |  | 3  | 2.4E-1 | 9.7E-1  |           |  |
|                          | Annotation Cluster 110 | Enrichment Score: 0.95                                                                                                                                                        | <b>G</b>           |  |    | Count  | P_Value | Benjamini |  |
| <input type="checkbox"/> | GOTERM_CC_ALL          | <a href="#">nuclear envelope-endoplasmic reticulum network</a>                                                                                                                | <a href="#">RT</a> |  | 18 | 1.5E-2 | 1.6E-1  |           |  |
| <input type="checkbox"/> | GOTERM_CC_ALL          | <a href="#">endoplasmic reticulum part</a>                                                                                                                                    | <a href="#">RT</a> |  | 19 | 1.6E-2 | 1.6E-1  |           |  |
| <input type="checkbox"/> | GOTERM_CC_ALL          | <a href="#">endoplasmic reticulum membrane</a>                                                                                                                                | <a href="#">RT</a> |  | 17 | 2.2E-2 | 2.0E-1  |           |  |
| <input type="checkbox"/> | GOTERM_CC_ALL          | <a href="#">integral to endoplasmic reticulum membrane</a>                                                                                                                    | <a href="#">RT</a> |  | 6  | 1.9E-1 | 7.2E-1  |           |  |
| <input type="checkbox"/> | GOTERM_CC_ALL          | <a href="#">intrinsic to endoplasmic reticulum membrane</a>                                                                                                                   | <a href="#">RT</a> |  | 6  | 2.8E-1 | 8.2E-1  |           |  |
| <input type="checkbox"/> | GOTERM_CC_ALL          | <a href="#">integral to organelle membrane</a>                                                                                                                                | <a href="#">RT</a> |  | 6  | 8.3E-1 | 1.0E0   |           |  |
| <input type="checkbox"/> | GOTERM_CC_ALL          | <a href="#">intrinsic to organelle membrane</a>                                                                                                                               | <a href="#">RT</a> |  | 6  | 8.9E-1 | 1.0E0   |           |  |
|                          | Annotation Cluster 111 | Enrichment Score: 0.92                                                                                                                                                        | <b>G</b>           |  |    | Count  | P_Value | Benjamini |  |
| <input type="checkbox"/> | KEGG_PATHWAY           | <a href="#">Polyunsaturated fatty acid biosynthesis</a>                                                                                                                       | <a href="#">RT</a> |  | 6  | 3.6E-2 | 3.8E-1  |           |  |
| <input type="checkbox"/> | GOTERM_MF_ALL          | <a href="#">stearoyl-CoA 9-desaturase activity</a>                                                                                                                            | <a href="#">RT</a> |  | 3  | 7.0E-2 | 8.6E-1  |           |  |
| <input type="checkbox"/> | INTERPRO               | <a href="#">Fatty acid desaturase, type 1, N-terminal</a>                                                                                                                     | <a href="#">RT</a> |  | 3  | 9.2E-2 | 1.0E0   |           |  |
| <input type="checkbox"/> | INTERPRO               | <a href="#">Fatty acid desaturase, type 1</a>                                                                                                                                 | <a href="#">RT</a> |  | 3  | 1.2E-1 | 1.0E0   |           |  |
| <input type="checkbox"/> | GOTERM_MF_ALL          | <a href="#">oxidoreductase activity, acting on paired donors, with oxidation of a pair of donors resulting in the reduction of molecular oxygen to two molecules of water</a> | <a href="#">RT</a> |  | 3  | 1.3E-1 | 9.4E-1  |           |  |
| <input type="checkbox"/> | KEGG_PATHWAY           | <a href="#">PPAR signaling pathway</a>                                                                                                                                        | <a href="#">RT</a> |  | 7  | 8.7E-1 | 1.0E0   |           |  |
|                          | Annotation Cluster 112 | Enrichment Score: 0.89                                                                                                                                                        | <b>G</b>           |  |    | Count  | P_Value | Benjamini |  |
| <input type="checkbox"/> | GOTERM_MF_ALL          | <a href="#">heat shock protein binding</a>                                                                                                                                    | <a href="#">RT</a> |  | 11 | 3.3E-2 | 6.7E-1  |           |  |
| <input type="checkbox"/> | INTERPRO               | <a href="#">Molecular chaperone, heat shock protein, Hsp40, DnaJ</a>                                                                                                          | <a href="#">RT</a> |  | 7  | 6.7E-2 | 9.9E-1  |           |  |
| <input type="checkbox"/> | SMART                  | <a href="#">DnaJ</a>                                                                                                                                                          | <a href="#">RT</a> |  | 7  | 1.0E-1 | 9.5E-1  |           |  |

| <input type="checkbox"/> | INTERPRO               | <a href="#">Heat shock protein DnaJ, N-terminal</a>                                  | RT       |  |  |  |  | 7     | 1.5E-1  | 1.0E0     |
|--------------------------|------------------------|--------------------------------------------------------------------------------------|----------|--|--|--|--|-------|---------|-----------|
| <input type="checkbox"/> | INTERPRO               | <a href="#">Heat shock protein DnaJ</a>                                              | RT       |  |  |  |  | 4     | 2.6E-1  | 1.0E0     |
| <input type="checkbox"/> | UP_SEQ_FEATURE         | domain:J                                                                             | RT       |  |  |  |  | 4     | 5.4E-1  | 1.0E0     |
|                          | Annotation Cluster 113 | Enrichment Score: 0.87                                                               | <b>G</b> |  |  |  |  | Count | P_Value | Benjamini |
| <input type="checkbox"/> | SP_PIR_KEYWORDS        | <a href="#">pyridoxal phosphate</a>                                                  | RT       |  |  |  |  | 12    | 1.4E-2  | 1.6E-1    |
| <input type="checkbox"/> | UP_SEQ_FEATURE         | binding site:Pyridoxal phosphate (covalent)                                          | RT       |  |  |  |  | 8     | 5.7E-2  | 1.0E0     |
| <input type="checkbox"/> | GOTERM_MF_ALL          | <a href="#">vitamin binding</a>                                                      | RT       |  |  |  |  | 16    | 8.7E-2  | 8.8E-1    |
| <input type="checkbox"/> | GOTERM_MF_ALL          | <a href="#">transferase activity, transferring nitrogenous groups</a>                | RT       |  |  |  |  | 7     | 1.6E-1  | 9.6E-1    |
| <input type="checkbox"/> | SP_PIR_KEYWORDS        | <a href="#">aminotransferase</a>                                                     | RT       |  |  |  |  | 5     | 1.6E-1  | 7.4E-1    |
| <input type="checkbox"/> | GOTERM_MF_ALL          | <a href="#">pyridoxal phosphate binding</a>                                          | RT       |  |  |  |  | 8     | 1.6E-1  | 9.6E-1    |
| <input type="checkbox"/> | GOTERM_MF_ALL          | <a href="#">transaminase activity</a>                                                | RT       |  |  |  |  | 6     | 2.5E-1  | 9.9E-1    |
| <input type="checkbox"/> | INTERPRO               | <a href="#">Aminotransferase, class I and II</a>                                     | RT       |  |  |  |  | 3     | 3.9E-1  | 1.0E0     |
| <input type="checkbox"/> | INTERPRO               | <a href="#">Pyridoxal phosphate-dependent transferase, major region, subdomain 1</a> | RT       |  |  |  |  | 4     | 5.7E-1  | 1.0E0     |
|                          | Annotation Cluster 114 | Enrichment Score: 0.87                                                               | <b>G</b> |  |  |  |  | Count | P_Value | Benjamini |
| <input type="checkbox"/> | INTERPRO               | <a href="#">Cyclin D</a>                                                             | RT       |  |  |  |  | 4     | 2.6E-3  | 5.6E-1    |
| <input type="checkbox"/> | KEGG_PATHWAY           | <a href="#">Wnt signaling pathway</a>                                                | RT       |  |  |  |  | 12    | 9.6E-1  | 1.0E0     |
| <input type="checkbox"/> | KEGG_PATHWAY           | <a href="#">Jak-STAT signaling pathway</a>                                           | RT       |  |  |  |  | 8     | 1.0E0   | 1.0E0     |
|                          | Annotation Cluster 115 | Enrichment Score: 0.86                                                               | <b>G</b> |  |  |  |  | Count | P_Value | Benjamini |
| <input type="checkbox"/> | GOTERM_MF_ALL          | <a href="#">exonuclease activity</a>                                                 | RT       |  |  |  |  | 12    | 1.0E-2  | 3.5E-1    |
| <input type="checkbox"/> | SP_PIR_KEYWORDS        | <a href="#">Exonuclease</a>                                                          | RT       |  |  |  |  | 8     | 2.8E-2  | 2.7E-1    |
| <input type="checkbox"/> | GOTERM_MF_ALL          | <a href="#">nuclease activity</a>                                                    | RT       |  |  |  |  | 20    | 7.5E-2  | 8.5E-1    |
| <input type="checkbox"/> | GOTERM_MF_ALL          | <a href="#">endodeoxyribonuclease activity</a>                                       | RT       |  |  |  |  | 3     | 2.3E-1  | 9.9E-1    |
| <input type="checkbox"/> | SP_PIR_KEYWORDS        | <a href="#">Endonuclease</a>                                                         | RT       |  |  |  |  | 7     | 3.3E-1  | 9.1E-1    |
| <input type="checkbox"/> | SP_PIR_KEYWORDS        | <a href="#">nuclease</a>                                                             | RT       |  |  |  |  | 9     | 4.0E-1  | 9.5E-1    |
| <input type="checkbox"/> | GOTERM_MF_ALL          | <a href="#">endonuclease activity</a>                                                | RT       |  |  |  |  | 10    | 4.0E-1  | 1.0E0     |
| <input type="checkbox"/> | GOTERM_MF_ALL          | <a href="#">deoxyribonuclease activity</a>                                           | RT       |  |  |  |  | 3     | 4.7E-1  | 1.0E0     |
|                          | Annotation Cluster 116 | Enrichment Score: 0.86                                                               | <b>G</b> |  |  |  |  | Count | P_Value | Benjamini |
| <input type="checkbox"/> | GOTERM_BP_ALL          | <a href="#">regulation of RNA metabolic process</a>                                  | RT       |  |  |  |  | 6     | 2.2E-2  | 4.6E-1    |
| <input type="checkbox"/> | GOTERM_BP_ALL          | <a href="#">regulation of mRNA stability</a>                                         | RT       |  |  |  |  | 3     | 3.1E-1  | 9.9E-1    |
| <input type="checkbox"/> | GOTERM_BP_ALL          | <a href="#">regulation of RNA stability</a>                                          | RT       |  |  |  |  | 3     | 3.8E-1  | 1.0E0     |
|                          | Annotation Cluster 117 | Enrichment Score: 0.85                                                               | <b>G</b> |  |  |  |  | Count | P_Value | Benjamini |
| <input type="checkbox"/> | GOTERM_BP_ALL          | <a href="#">polyamine biosynthetic process</a>                                       | RT       |  |  |  |  | 4     | 2.2E-2  | 4.6E-1    |
| <input type="checkbox"/> | INTERPRO               | <a href="#">Ornithine decarboxylase</a>                                              | RT       |  |  |  |  | 3     | 4.2E-2  | 9.9E-1    |
| <input type="checkbox"/> | GOTERM_BP_ALL          | <a href="#">polyamine metabolic process</a>                                          | RT       |  |  |  |  | 5     | 6.9E-2  | 7.6E-1    |
| <input type="checkbox"/> | GOTERM_BP_ALL          | <a href="#">biogenic amine biosynthetic process</a>                                  | RT       |  |  |  |  | 6     | 9.1E-2  | 8.1E-1    |
| <input type="checkbox"/> | SP_PIR_KEYWORDS        | <a href="#">Polyamine biosynthesis</a>                                               | RT       |  |  |  |  | 3     | 9.9E-2  | 5.8E-1    |
| <input type="checkbox"/> | INTERPRO               | <a href="#">Orn/DAP/Arg decarboxylase 2</a>                                          | RT       |  |  |  |  | 3     | 1.2E-1  | 1.0E0     |
| <input type="checkbox"/> | GOTERM_BP_ALL          | <a href="#">amino acid derivative biosynthetic process</a>                           | RT       |  |  |  |  | 6     | 1.6E-1  | 9.3E-1    |
| <input type="checkbox"/> | SP_PIR_KEYWORDS        | <a href="#">decarboxylase</a>                                                        | RT       |  |  |  |  | 5     | 1.7E-1  | 7.7E-1    |
| <input type="checkbox"/> | GOTERM_MF_ALL          | <a href="#">carboxy-lyase activity</a>                                               | RT       |  |  |  |  | 6     | 1.8E-1  | 9.7E-1    |
| <input type="checkbox"/> | GOTERM_MF_ALL          | <a href="#">carbon-carbon lyase activity</a>                                         | RT       |  |  |  |  | 7     | 2.4E-1  | 9.9E-1    |
| <input type="checkbox"/> | GOTERM_BP_ALL          | <a href="#">amino acid derivative metabolic process</a>                              | RT       |  |  |  |  | 11    | 3.8E-1  | 9.9E-1    |
| <input type="checkbox"/> | KEGG_PATHWAY           | <a href="#">Urea cycle and metabolism of amino groups</a>                            | RT       |  |  |  |  | 5     | 5.0E-1  | 9.4E-1    |
| <input type="checkbox"/> | GOTERM_BP_ALL          | <a href="#">biogenic amine metabolic process</a>                                     | RT       |  |  |  |  | 8     | 5.9E-1  | 1.0E0     |
|                          | Annotation Cluster 118 | Enrichment Score: 0.85                                                               | <b>G</b> |  |  |  |  | Count | P_Value | Benjamini |
| <input type="checkbox"/> | GOTERM_MF_ALL          | <a href="#">superoxide dismutase activity</a>                                        | RT       |  |  |  |  | 4     | 5.7E-2  | 8.2E-1    |
| <input type="checkbox"/> | GOTERM_MF_ALL          | <a href="#">oxidoreductase activity, acting on superoxide radicals as acceptor</a>   | RT       |  |  |  |  | 4     | 5.7E-2  | 8.2E-1    |
| <input type="checkbox"/> | GOTERM_MF_ALL          | <a href="#">copper, zinc superoxide dismutase</a>                                    | RT       |  |  |  |  | 2     | 1.2E-1  | 9.4E-1    |



|                          |                        |                                                                                    |                    |  | Count | P_Value | Benjamini |
|--------------------------|------------------------|------------------------------------------------------------------------------------|--------------------|--|-------|---------|-----------|
| <input type="checkbox"/> |                        | <a href="#">activity</a>                                                           | <a href="#">RT</a> |  | 3     | 1.0E-1  | 9.9E-1    |
| <input type="checkbox"/> | GOTERM_BP_ALL          | <a href="#">superoxide metabolic process</a>                                       | <a href="#">RT</a> |  | 4     | 3.2E-1  | 9.9E-1    |
| <input type="checkbox"/> | GOTERM_BP_ALL          | <a href="#">oxygen and reactive oxygen species metabolic process</a>               | <a href="#">RT</a> |  | 5     | 4.4E-1  | 1.0E0     |
|                          | Annotation Cluster 119 | Enrichment Score: 0.84                                                             | <b>G</b>           |  |       |         |           |
| <input type="checkbox"/> | SMART                  | <a href="#">TPR</a>                                                                | <a href="#">RT</a> |  | 16    | 8.0E-3  | 3.8E-1    |
| <input type="checkbox"/> | INTERPRO               | <a href="#">Tetratricopeptide region</a>                                           | <a href="#">RT</a> |  | 16    | 2.5E-2  | 9.7E-1    |
| <input type="checkbox"/> | INTERPRO               | <a href="#">Tetratricopeptide TPR-1</a>                                            | <a href="#">RT</a> |  | 13    | 4.1E-2  | 9.9E-1    |
| <input type="checkbox"/> | SP_PIR_KEYWORDS        | <a href="#">TPR repeat</a>                                                         | <a href="#">RT</a> |  | 17    | 5.5E-2  | 4.2E-1    |
| <input type="checkbox"/> | INTERPRO               | <a href="#">Tetratricopeptide-like helical</a>                                     | <a href="#">RT</a> |  | 16    | 6.0E-2  | 1.0E0     |
| <input type="checkbox"/> | INTERPRO               | <a href="#">Tetratricopeptide TPR2</a>                                             | <a href="#">RT</a> |  | 8     | 1.6E-1  | 1.0E0     |
| <input type="checkbox"/> | UP_SEQ_FEATURE         | repeat:TPR 3                                                                       | <a href="#">RT</a> |  | 9     | 1.8E-1  | 1.0E0     |
| <input type="checkbox"/> | UP_SEQ_FEATURE         | repeat:TPR 2                                                                       | <a href="#">RT</a> |  | 9     | 2.4E-1  | 1.0E0     |
| <input type="checkbox"/> | UP_SEQ_FEATURE         | repeat:TPR 1                                                                       | <a href="#">RT</a> |  | 9     | 2.4E-1  | 1.0E0     |
| <input type="checkbox"/> | UP_SEQ_FEATURE         | repeat:TPR 9                                                                       | <a href="#">RT</a> |  | 3     | 2.8E-1  | 1.0E0     |
| <input type="checkbox"/> | UP_SEQ_FEATURE         | repeat:TPR 8                                                                       | <a href="#">RT</a> |  | 4     | 3.2E-1  | 1.0E0     |
| <input type="checkbox"/> | UP_SEQ_FEATURE         | repeat:TPR 4                                                                       | <a href="#">RT</a> |  | 6     | 3.2E-1  | 1.0E0     |
| <input type="checkbox"/> | UP_SEQ_FEATURE         | repeat:TPR 7                                                                       | <a href="#">RT</a> |  | 4     | 5.2E-1  | 1.0E0     |
| <input type="checkbox"/> | UP_SEQ_FEATURE         | repeat:TPR 6                                                                       | <a href="#">RT</a> |  | 4     | 5.7E-1  | 1.0E0     |
| <input type="checkbox"/> | UP_SEQ_FEATURE         | repeat:TPR 5                                                                       | <a href="#">RT</a> |  | 4     | 5.9E-1  | 1.0E0     |
|                          | Annotation Cluster 120 | Enrichment Score: 0.83                                                             | <b>G</b>           |  |       |         |           |
| <input type="checkbox"/> | GOTERM_BP_ALL          | <a href="#">anti-apoptosis</a>                                                     | <a href="#">RT</a> |  | 18    | 1.8E-2  | 4.2E-1    |
| <input type="checkbox"/> | GOTERM_BP_ALL          | <a href="#">negative regulation of programmed cell death</a>                       | <a href="#">RT</a> |  | 25    | 1.3E-1  | 8.9E-1    |
| <input type="checkbox"/> | GOTERM_BP_ALL          | <a href="#">negative regulation of apoptosis</a>                                   | <a href="#">RT</a> |  | 24    | 1.6E-1  | 9.3E-1    |
| <input type="checkbox"/> | GOTERM_BP_ALL          | <a href="#">regulation of programmed cell death</a>                                | <a href="#">RT</a> |  | 47    | 4.1E-1  | 1.0E0     |
| <input type="checkbox"/> | GOTERM_BP_ALL          | <a href="#">regulation of apoptosis</a>                                            | <a href="#">RT</a> |  | 46    | 4.3E-1  | 1.0E0     |
|                          | Annotation Cluster 121 | Enrichment Score: 0.83                                                             | <b>G</b>           |  |       |         |           |
| <input type="checkbox"/> | SP_PIR_KEYWORDS        | <a href="#">proteasome</a>                                                         | <a href="#">RT</a> |  | 14    | 8.2E-4  | 1.6E-2    |
| <input type="checkbox"/> | KEGG_PATHWAY           | <a href="#">Proteasome</a>                                                         | <a href="#">RT</a> |  | 8     | 5.4E-2  | 4.8E-1    |
| <input type="checkbox"/> | GOTERM_CC_ALL          | <a href="#">proteasome complex (sensu Eukaryota)</a>                               | <a href="#">RT</a> |  | 6     | 1.7E-1  | 7.0E-1    |
| <input type="checkbox"/> | INTERPRO               | <a href="#">Peptidase T1A, proteasome beta-subunit</a>                             | <a href="#">RT</a> |  | 3     | 2.9E-1  | 1.0E0     |
| <input type="checkbox"/> | INTERPRO               | <a href="#">20S proteasome, A and B subunits</a>                                   | <a href="#">RT</a> |  | 3     | 5.1E-1  | 1.0E0     |
| <input type="checkbox"/> | SP_PIR_KEYWORDS        | <a href="#">Threonine protease</a>                                                 | <a href="#">RT</a> |  | 3     | 5.6E-1  | 9.8E-1    |
| <input type="checkbox"/> | GOTERM_CC_ALL          | <a href="#">proteasome core complex (sensu Eukaryota)</a>                          | <a href="#">RT</a> |  | 3     | 5.8E-1  | 9.8E-1    |
| <input type="checkbox"/> | GOTERM_MF_ALL          | <a href="#">threonine endopeptidase activity</a>                                   | <a href="#">RT</a> |  | 3     | 6.1E-1  | 1.0E0     |
|                          | Annotation Cluster 122 | Enrichment Score: 0.81                                                             | <b>G</b>           |  |       |         |           |
| <input type="checkbox"/> | SP_PIR_KEYWORDS        | <a href="#">porin</a>                                                              | <a href="#">RT</a> |  | 8     | 1.4E-2  | 1.6E-1    |
| <input type="checkbox"/> | GOTERM_CC_ALL          | <a href="#">outer membrane</a>                                                     | <a href="#">RT</a> |  | 14    | 2.7E-2  | 2.3E-1    |
| <input type="checkbox"/> | GOTERM_MF_ALL          | <a href="#">porin activity</a>                                                     | <a href="#">RT</a> |  | 6     | 9.6E-2  | 8.9E-1    |
| <input type="checkbox"/> | GOTERM_MF_ALL          | <a href="#">wide pore channel activity</a>                                         | <a href="#">RT</a> |  | 6     | 3.8E-1  | 1.0E0     |
| <input type="checkbox"/> | GOTERM_MF_ALL          | <a href="#">passive transmembrane transporter activity</a>                         | <a href="#">RT</a> |  | 13    | 1.0E0   | 1.0E0     |
| <input type="checkbox"/> | GOTERM_MF_ALL          | <a href="#">channel activity</a>                                                   | <a href="#">RT</a> |  | 13    | 1.0E0   | 1.0E0     |
|                          | Annotation Cluster 123 | Enrichment Score: 0.8                                                              | <b>G</b>           |  |       |         |           |
| <input type="checkbox"/> | BIOCARTA               | <a href="#">RB Tumor Suppressor/Checkpoint Signaling in response to DNA damage</a> | <a href="#">RT</a> |  | 5     | 4.6E-2  | 6.4E-1    |
| <input type="checkbox"/> | GOTERM_MF_ALL          | <a href="#">cyclin-dependent protein kinase activity</a>                           | <a href="#">RT</a> |  | 6     | 1.2E-1  | 9.4E-1    |
| <input type="checkbox"/> | PIR_SUPERFAMILY        | PIRSF000564:kinase-related transforming protein                                    | <a href="#">RT</a> |  | 4     | 7.0E-1  | 1.0E0     |
|                          | Annotation Cluster 124 | Enrichment Score: 0.8                                                              | <b>G</b>           |  |       |         |           |
| <input type="checkbox"/> | SP_PIR_KEYWORDS        | <a href="#">lysosome</a>                                                           | <a href="#">RT</a> |  | 17    | 7.1E-2  | 4.8E-1    |
| <input type="checkbox"/> | GOTERM_CC_ALL          | <a href="#">vacuole</a>                                                            | <a href="#">RT</a> |  | 24    | 1.8E-1  | 7.0E-1    |

| <input type="checkbox"/> | Category        | Term                                                                            | RT                     | Bar      | Count | P-Value | Benjamini |           |
|--------------------------|-----------------|---------------------------------------------------------------------------------|------------------------|----------|-------|---------|-----------|-----------|
| <input type="checkbox"/> | GOTERM_CC_ALL   | <a href="#">lysosome</a>                                                        | RT                     |          | 21    | 2.3E-1  | 7.7E-1    |           |
| <input type="checkbox"/> | GOTERM_CC_ALL   | <a href="#">lytic vacuole</a>                                                   | RT                     |          | 21    | 2.3E-1  | 7.7E-1    |           |
|                          |                 | Annotation Cluster 125                                                          | Enrichment Score: 0.78 | <b>G</b> |       | Count   | P-Value   | Benjamini |
| <input type="checkbox"/> | UP_SEQ_FEATURE  | repeat:1-1                                                                      | RT                     |          | 4     | 1.2E-1  | 1.0E0     |           |
| <input type="checkbox"/> | UP_SEQ_FEATURE  | repeat:2-1                                                                      | RT                     |          | 4     | 1.5E-1  | 1.0E0     |           |
| <input type="checkbox"/> | UP_SEQ_FEATURE  | repeat:1-2                                                                      | RT                     |          | 4     | 1.7E-1  | 1.0E0     |           |
| <input type="checkbox"/> | UP_SEQ_FEATURE  | repeat:2-2                                                                      | RT                     |          | 4     | 1.7E-1  | 1.0E0     |           |
| <input type="checkbox"/> | UP_SEQ_FEATURE  | repeat:1-3                                                                      | RT                     |          | 3     | 2.0E-1  | 1.0E0     |           |
| <input type="checkbox"/> | UP_SEQ_FEATURE  | repeat:2-3                                                                      | RT                     |          | 3     | 2.0E-1  | 1.0E0     |           |
|                          |                 | Annotation Cluster 126                                                          | Enrichment Score: 0.78 | <b>G</b> |       | Count   | P-Value   | Benjamini |
| <input type="checkbox"/> | GOTERM_MF_ALL   | <a href="#">transferase activity</a>                                            | RT                     |          | 211   | 6.3E-5  | 9.3E-3    |           |
| <input type="checkbox"/> | SP_PIR_KEYWORDS | <a href="#">transferase</a>                                                     | RT                     |          | 152   | 1.2E-3  | 2.0E-2    |           |
| <input type="checkbox"/> | GOTERM_MF_ALL   | <a href="#">transferase activity, transferring phosphorus-containing groups</a> | RT                     |          | 120   | 2.8E-3  | 1.4E-1    |           |
| <input type="checkbox"/> | GOTERM_MF_ALL   | <a href="#">kinase activity</a>                                                 | RT                     |          | 95    | 6.9E-2  | 8.6E-1    |           |
| <input type="checkbox"/> | SMART           | <a href="#">S_TKc</a>                                                           | RT                     |          | 33    | 1.4E-1  | 9.8E-1    |           |
| <input type="checkbox"/> | INTERPRO        | <a href="#">Serine/threonine protein kinase</a>                                 | RT                     |          | 24    | 1.6E-1  | 1.0E0     |           |
| <input type="checkbox"/> | INTERPRO        | <a href="#">Serine/threonine protein kinase, active site</a>                    | RT                     |          | 28    | 1.9E-1  | 1.0E0     |           |
| <input type="checkbox"/> | SP_PIR_KEYWORDS | <a href="#">kinase</a>                                                          | RT                     |          | 71    | 2.9E-1  | 8.9E-1    |           |
| <input type="checkbox"/> | SP_PIR_KEYWORDS | <a href="#">Serine/threonine-protein kinase</a>                                 | RT                     |          | 36    | 3.5E-1  | 9.3E-1    |           |
| <input type="checkbox"/> | UP_SEQ_FEATURE  | binding site:ATP                                                                | RT                     |          | 42    | 3.7E-1  | 1.0E0     |           |
| <input type="checkbox"/> | UP_SEQ_FEATURE  | active site:Proton acceptor                                                     | RT                     |          | 50    | 5.6E-1  | 1.0E0     |           |
| <input type="checkbox"/> | GOTERM_MF_ALL   | <a href="#">phosphotransferase activity, alcohol group as acceptor</a>          | RT                     |          | 64    | 5.9E-1  | 1.0E0     |           |
| <input type="checkbox"/> | GOTERM_BP_ALL   | <a href="#">phosphate metabolic process</a>                                     | RT                     |          | 80    | 6.1E-1  | 1.0E0     |           |
| <input type="checkbox"/> | GOTERM_BP_ALL   | <a href="#">phosphorus metabolic process</a>                                    | RT                     |          | 80    | 6.1E-1  | 1.0E0     |           |
| <input type="checkbox"/> | UP_SEQ_FEATURE  | domain:Protein kinase                                                           | RT                     |          | 35    | 6.4E-1  | 1.0E0     |           |
| <input type="checkbox"/> | INTERPRO        | <a href="#">Protein kinase, core</a>                                            | RT                     |          | 30    | 6.6E-1  | 1.0E0     |           |
| <input type="checkbox"/> | GOTERM_MF_ALL   | <a href="#">protein serine/threonine kinase activity</a>                        | RT                     |          | 42    | 7.2E-1  | 1.0E0     |           |
| <input type="checkbox"/> | GOTERM_MF_ALL   | <a href="#">protein kinase activity</a>                                         | RT                     |          | 51    | 7.8E-1  | 1.0E0     |           |
| <input type="checkbox"/> | GOTERM_BP_ALL   | <a href="#">phosphorylation</a>                                                 | RT                     |          | 63    | 7.9E-1  | 1.0E0     |           |
| <input type="checkbox"/> | GOTERM_MF_ALL   | <a href="#">protein-tyrosine kinase activity</a>                                | RT                     |          | 23    | 9.4E-1  | 1.0E0     |           |
| <input type="checkbox"/> | GOTERM_BP_ALL   | <a href="#">protein amino acid phosphorylation</a>                              | RT                     |          | 49    | 9.5E-1  | 1.0E0     |           |
|                          |                 | Annotation Cluster 127                                                          | Enrichment Score: 0.74 | <b>G</b> |       | Count   | P-Value   | Benjamini |
| <input type="checkbox"/> | SMART           | <a href="#">PHB</a>                                                             | RT                     |          | 3     | 1.6E-1  | 9.8E-1    |           |
| <input type="checkbox"/> | PIR_SUPERFAMILY | PIRSF005651:membrane protease subunits, stomatin/prohibitin homologs            | RT                     |          | 3     | 1.7E-1  | 1.0E0     |           |
| <input type="checkbox"/> | INTERPRO        | <a href="#">Band 7 protein</a>                                                  | RT                     |          | 3     | 2.2E-1  | 1.0E0     |           |
|                          |                 | Annotation Cluster 128                                                          | Enrichment Score: 0.74 | <b>G</b> |       | Count   | P-Value   | Benjamini |
| <input type="checkbox"/> | GOTERM_BP_ALL   | <a href="#">centrosome organization and biogenesis</a>                          | RT                     |          | 4     | 1.4E-1  | 9.0E-1    |           |
| <input type="checkbox"/> | GOTERM_BP_ALL   | <a href="#">microtubule organizing center organization and biogenesis</a>       | RT                     |          | 4     | 1.6E-1  | 9.3E-1    |           |
| <input type="checkbox"/> | GOTERM_BP_ALL   | <a href="#">centrosome cycle</a>                                                | RT                     |          | 3     | 2.8E-1  | 9.8E-1    |           |
|                          |                 | Annotation Cluster 129                                                          | Enrichment Score: 0.69 | <b>G</b> |       | Count   | P-Value   | Benjamini |
| <input type="checkbox"/> | SMART           | <a href="#">DSRM</a>                                                            | RT                     |          | 5     | 9.5E-2  | 9.5E-1    |           |
| <input type="checkbox"/> | INTERPRO        | <a href="#">Double-stranded RNA-binding-like</a>                                | RT                     |          | 4     | 2.3E-1  | 1.0E0     |           |
| <input type="checkbox"/> | GOTERM_MF_ALL   | <a href="#">double-stranded RNA binding</a>                                     | RT                     |          | 6     | 2.5E-1  | 9.9E-1    |           |
| <input type="checkbox"/> | INTERPRO        | <a href="#">Double-stranded RNA binding</a>                                     | RT                     |          | 4     | 3.1E-1  | 1.0E0     |           |
|                          |                 | Annotation Cluster 130                                                          | Enrichment Score: 0.69 | <b>G</b> |       | Count   | P-Value   | Benjamini |
| <input type="checkbox"/> | GOTERM_BP_ALL   | <a href="#">double-strand break repair</a>                                      | RT                     |          | 5     | 2.0E-1  | 9.6E-1    |           |
| <input type="checkbox"/> | GOTERM_BP_ALL   | <a href="#">recombinational repair</a>                                          | RT                     |          | 3     | 2.0E-1  | 9.6E-1    |           |
| <input type="checkbox"/> | GOTERM_BP_ALL   | <a href="#">double-strand break repair via homologous recombination</a>         | RT                     |          | 3     | 2.0E-1  | 9.6E-1    |           |

| Annotation Cluster 131   |                 | Enrichment Score: 0.67                                                                                    | G  |  | Count | P_Value | Benjamini |
|--------------------------|-----------------|-----------------------------------------------------------------------------------------------------------|----|--|-------|---------|-----------|
| <input type="checkbox"/> | GOTERM_BP_ALL   | <a href="#">chromosome organization and biogenesis</a>                                                    | RT |  | 43    | 2.0E-2  | 4.4E-1    |
| <input type="checkbox"/> | GOTERM_BP_ALL   | <a href="#">DNA packaging</a>                                                                             | RT |  | 28    | 2.8E-1  | 9.8E-1    |
| <input type="checkbox"/> | GOTERM_BP_ALL   | <a href="#">establishment and/or maintenance of chromatin architecture</a>                                | RT |  | 26    | 3.8E-1  | 9.9E-1    |
| <input type="checkbox"/> | GOTERM_BP_ALL   | <a href="#">chromatin modification</a>                                                                    | RT |  | 19    | 4.4E-1  | 1.0E0     |
| <input type="checkbox"/> | SP_PIR_KEYWORDS | <a href="#">Chromatin regulator</a>                                                                       | RT |  | 11    | 4.8E-1  | 9.7E-1    |
| Annotation Cluster 132   |                 | Enrichment Score: 0.67                                                                                    | G  |  | Count | P_Value | Benjamini |
| <input type="checkbox"/> | GOTERM_BP_ALL   | <a href="#">negative regulation of cellular component organization and biogenesis</a>                     | RT |  | 9     | 3.5E-2  | 5.8E-1    |
| <input type="checkbox"/> | GOTERM_BP_ALL   | <a href="#">microtubule polymerization or depolymerization</a>                                            | RT |  | 4     | 2.1E-1  | 9.6E-1    |
| <input type="checkbox"/> | GOTERM_BP_ALL   | <a href="#">microtubule depolymerization</a>                                                              | RT |  | 3     | 3.5E-1  | 9.9E-1    |
| <input type="checkbox"/> | GOTERM_BP_ALL   | <a href="#">negative regulation of microtubule polymerization or depolymerization</a>                     | RT |  | 3     | 3.8E-1  | 1.0E0     |
| <input type="checkbox"/> | GOTERM_BP_ALL   | <a href="#">regulation of microtubule polymerization or depolymerization</a>                              | RT |  | 3     | 4.5E-1  | 1.0E0     |
| Annotation Cluster 133   |                 | Enrichment Score: 0.66                                                                                    | G  |  | Count | P_Value | Benjamini |
| <input type="checkbox"/> | GOTERM_BP_ALL   | <a href="#">cell proliferation</a>                                                                        | RT |  | 64    | 6.2E-2  | 7.3E-1    |
| <input type="checkbox"/> | GOTERM_BP_ALL   | <a href="#">positive regulation of cell proliferation</a>                                                 | RT |  | 23    | 3.5E-1  | 9.9E-1    |
| <input type="checkbox"/> | GOTERM_BP_ALL   | <a href="#">regulation of cell proliferation</a>                                                          | RT |  | 38    | 4.7E-1  | 1.0E0     |
| Annotation Cluster 134   |                 | Enrichment Score: 0.66                                                                                    | G  |  | Count | P_Value | Benjamini |
| <input type="checkbox"/> | UP_SEQ_FEATURE  | metal ion-binding site:Manganese                                                                          | RT |  | 6     | 6.0E-2  | 1.0E0     |
| <input type="checkbox"/> | GOTERM_MF_ALL   | <a href="#">manganese ion binding</a>                                                                     | RT |  | 16    | 2.1E-1  | 9.8E-1    |
| <input type="checkbox"/> | SP_PIR_KEYWORDS | <a href="#">Manganese</a>                                                                                 | RT |  | 15    | 2.3E-1  | 8.4E-1    |
| <input type="checkbox"/> | GOTERM_MF_ALL   | <a href="#">UDP-glycosyltransferase activity</a>                                                          | RT |  | 8     | 8.0E-1  | 1.0E0     |
| Annotation Cluster 135   |                 | Enrichment Score: 0.65                                                                                    | G  |  | Count | P_Value | Benjamini |
| <input type="checkbox"/> | INTERPRO        | <a href="#">Importin-beta, N-terminal</a>                                                                 | RT |  | 5     | 3.8E-2  | 9.9E-1    |
| <input type="checkbox"/> | GOTERM_BP_ALL   | <a href="#">protein import into nucleus, docking</a>                                                      | RT |  | 5     | 4.6E-2  | 6.5E-1    |
| <input type="checkbox"/> | UP_SEQ_FEATURE  | domain:Importin N-terminal                                                                                | RT |  | 4     | 1.2E-1  | 1.0E0     |
| <input type="checkbox"/> | UP_SEQ_FEATURE  | repeat:HEAT 6                                                                                             | RT |  | 4     | 2.6E-1  | 1.0E0     |
| <input type="checkbox"/> | UP_SEQ_FEATURE  | repeat:HEAT 5                                                                                             | RT |  | 4     | 3.5E-1  | 1.0E0     |
| <input type="checkbox"/> | UP_SEQ_FEATURE  | repeat:HEAT 4                                                                                             | RT |  | 4     | 4.0E-1  | 1.0E0     |
| <input type="checkbox"/> | GOTERM_BP_ALL   | <a href="#">cellular protein complex assembly</a>                                                         | RT |  | 6     | 4.2E-1  | 1.0E0     |
| <input type="checkbox"/> | UP_SEQ_FEATURE  | repeat:HEAT 3                                                                                             | RT |  | 4     | 4.3E-1  | 1.0E0     |
| <input type="checkbox"/> | UP_SEQ_FEATURE  | repeat:HEAT 1                                                                                             | RT |  | 4     | 4.6E-1  | 1.0E0     |
| <input type="checkbox"/> | UP_SEQ_FEATURE  | repeat:HEAT 2                                                                                             | RT |  | 4     | 4.6E-1  | 1.0E0     |
| Annotation Cluster 136   |                 | Enrichment Score: 0.65                                                                                    | G  |  | Count | P_Value | Benjamini |
| <input type="checkbox"/> | SP_PIR_KEYWORDS | <a href="#">er-golgi transport</a>                                                                        | RT |  | 12    | 2.5E-2  | 2.5E-1    |
| <input type="checkbox"/> | GOTERM_BP_ALL   | <a href="#">ER to Golgi vesicle-mediated transport</a>                                                    | RT |  | 10    | 9.1E-2  | 8.1E-1    |
| <input type="checkbox"/> | GOTERM_BP_ALL   | <a href="#">Golgi vesicle transport</a>                                                                   | RT |  | 12    | 1.9E-1  | 9.5E-1    |
| <input type="checkbox"/> | GOTERM_BP_ALL   | <a href="#">secretion by cell</a>                                                                         | RT |  | 27    | 5.1E-1  | 1.0E0     |
| <input type="checkbox"/> | GOTERM_BP_ALL   | <a href="#">secretion</a>                                                                                 | RT |  | 29    | 7.5E-1  | 1.0E0     |
| <input type="checkbox"/> | GOTERM_BP_ALL   | <a href="#">secretory pathway</a>                                                                         | RT |  | 20    | 7.6E-1  | 1.0E0     |
| Annotation Cluster 137   |                 | Enrichment Score: 0.65                                                                                    | G  |  | Count | P_Value | Benjamini |
| <input type="checkbox"/> | GOTERM_MF_ALL   | <a href="#">poly(A) binding</a>                                                                           | RT |  | 3     | 1.3E-1  | 9.4E-1    |
| <input type="checkbox"/> | GOTERM_MF_ALL   | <a href="#">mRNA binding</a>                                                                              | RT |  | 6     | 2.1E-1  | 9.8E-1    |
| <input type="checkbox"/> | GOTERM_MF_ALL   | <a href="#">single-stranded RNA binding</a>                                                               | RT |  | 3     | 4.1E-1  | 1.0E0     |
| Annotation Cluster 138   |                 | Enrichment Score: 0.65                                                                                    | G  |  | Count | P_Value | Benjamini |
| <input type="checkbox"/> | INTERPRO        | <a href="#">Flavodoxin-like fold</a>                                                                      | RT |  | 3     | 2.2E-2  | 9.6E-1    |
| <input type="checkbox"/> | GOTERM_MF_ALL   | <a href="#">NAD(P)H dehydrogenase (quinone) activity</a>                                                  | RT |  | 3     | 2.4E-2  | 5.8E-1    |
| <input type="checkbox"/> | GOTERM_MF_ALL   | <a href="#">oxidoreductase activity, acting on NADH or NADPH, quinone or similar compound as acceptor</a> | RT |  | 7     | 2.0E-1  | 9.8E-1    |

| <input type="checkbox"/> | GOTERM_MF_ALL          | <a href="#">oxidoreductase activity, acting on NADH or NADPH</a>                        | <a href="#">RT</a> |  |  |  | 8     | 3.7E-1  | 1.0E0     |
|--------------------------|------------------------|-----------------------------------------------------------------------------------------|--------------------|--|--|--|-------|---------|-----------|
| <input type="checkbox"/> | SP_PIR_KEYWORDS        | <a href="#">ubiquinone</a>                                                              | <a href="#">RT</a> |  |  |  | 5     | 4.9E-1  | 9.7E-1    |
| <input type="checkbox"/> | GOTERM_MF_ALL          | <a href="#">NADH dehydrogenase activity</a>                                             | <a href="#">RT</a> |  |  |  | 4     | 7.1E-1  | 1.0E0     |
| <input type="checkbox"/> | GOTERM_MF_ALL          | <a href="#">NADH dehydrogenase (quinone) activity</a>                                   | <a href="#">RT</a> |  |  |  | 4     | 7.1E-1  | 1.0E0     |
| <input type="checkbox"/> | GOTERM_MF_ALL          | <a href="#">NADH dehydrogenase (ubiquinone) activity</a>                                | <a href="#">RT</a> |  |  |  | 4     | 7.1E-1  | 1.0E0     |
|                          | Annotation Cluster 139 | Enrichment Score: 0.63                                                                  | <b>G</b>           |  |  |  | Count | P_Value | Benjamini |
| <input type="checkbox"/> | INTERPRO               | <a href="#">MAP kinase phosphatase</a>                                                  | <a href="#">RT</a> |  |  |  | 4     | 3.9E-2  | 9.9E-1    |
| <input type="checkbox"/> | SMART                  | <a href="#">RHOD</a>                                                                    | <a href="#">RT</a> |  |  |  | 5     | 5.5E-2  | 9.0E-1    |
| <input type="checkbox"/> | INTERPRO               | <a href="#">Dual specificity protein phosphatase (MAP kinase phosphatase)</a>           | <a href="#">RT</a> |  |  |  | 3     | 6.5E-2  | 9.9E-1    |
| <input type="checkbox"/> | GOTERM_MF_ALL          | <a href="#">MAP kinase phosphatase activity</a>                                         | <a href="#">RT</a> |  |  |  | 4     | 7.3E-2  | 8.5E-1    |
| <input type="checkbox"/> | GOTERM_MF_ALL          | <a href="#">MAP kinase tyrosine/serine/threonine phosphatase activity</a>               | <a href="#">RT</a> |  |  |  | 4     | 7.3E-2  | 8.5E-1    |
| <input type="checkbox"/> | UP_SEQ_FEATURE         | domain:Rhodanese                                                                        | <a href="#">RT</a> |  |  |  | 4     | 1.2E-1  | 1.0E0     |
| <input type="checkbox"/> | GOTERM_MF_ALL          | <a href="#">phosphoric monoester hydrolase activity</a>                                 | <a href="#">RT</a> |  |  |  | 28    | 1.5E-1  | 9.6E-1    |
| <input type="checkbox"/> | SMART                  | <a href="#">DSPc</a>                                                                    | <a href="#">RT</a> |  |  |  | 5     | 1.9E-1  | 9.9E-1    |
| <input type="checkbox"/> | GOTERM_MF_ALL          | <a href="#">phosphoprotein phosphatase activity</a>                                     | <a href="#">RT</a> |  |  |  | 18    | 2.3E-1  | 9.9E-1    |
| <input type="checkbox"/> | INTERPRO               | <a href="#">Rhodanese-like</a>                                                          | <a href="#">RT</a> |  |  |  | 4     | 2.3E-1  | 1.0E0     |
| <input type="checkbox"/> | GOTERM_BP_ALL          | <a href="#">protein amino acid dephosphorylation</a>                                    | <a href="#">RT</a> |  |  |  | 15    | 2.6E-1  | 9.8E-1    |
| <input type="checkbox"/> | INTERPRO               | <a href="#">Protein-tyrosine phosphatase, dual specificity</a>                          | <a href="#">RT</a> |  |  |  | 5     | 2.7E-1  | 1.0E0     |
| <input type="checkbox"/> | GOTERM_MF_ALL          | <a href="#">protein tyrosine/serine/threonine phosphatase activity</a>                  | <a href="#">RT</a> |  |  |  | 6     | 2.8E-1  | 9.9E-1    |
| <input type="checkbox"/> | GOTERM_MF_ALL          | <a href="#">protein tyrosine phosphatase activity</a>                                   | <a href="#">RT</a> |  |  |  | 11    | 3.0E-1  | 1.0E0     |
| <input type="checkbox"/> | GOTERM_MF_ALL          | <a href="#">hydrolase activity, acting on ester bonds</a>                               | <a href="#">RT</a> |  |  |  | 61    | 3.8E-1  | 1.0E0     |
| <input type="checkbox"/> | SP_PIR_KEYWORDS        | <a href="#">protein phosphatase</a>                                                     | <a href="#">RT</a> |  |  |  | 12    | 3.9E-1  | 9.4E-1    |
| <input type="checkbox"/> | INTERPRO               | <a href="#">Protein-tyrosine phosphatase, Tyr-specific/dual-specificity type</a>        | <a href="#">RT</a> |  |  |  | 9     | 4.1E-1  | 1.0E0     |
| <input type="checkbox"/> | GOTERM_MF_ALL          | <a href="#">phosphoric ester hydrolase activity</a>                                     | <a href="#">RT</a> |  |  |  | 30    | 4.3E-1  | 1.0E0     |
| <input type="checkbox"/> | GOTERM_BP_ALL          | <a href="#">dephosphorylation</a>                                                       | <a href="#">RT</a> |  |  |  | 15    | 4.3E-1  | 1.0E0     |
| <input type="checkbox"/> | UP_SEQ_FEATURE         | domain:Tyrosine-protein phosphatase                                                     | <a href="#">RT</a> |  |  |  | 6     | 4.7E-1  | 1.0E0     |
| <input type="checkbox"/> | BIOCARTA               | <a href="#">Regulation of MAP Kinase Pathways Through Dual Specificity Phosphatases</a> | <a href="#">RT</a> |  |  |  | 3     | 4.9E-1  | 9.7E-1    |
| <input type="checkbox"/> | UP_SEQ_FEATURE         | active site:Phosphocysteine intermediate                                                | <a href="#">RT</a> |  |  |  | 7     | 5.0E-1  | 1.0E0     |
| <input type="checkbox"/> | SMART                  | <a href="#">PTPc</a>                                                                    | <a href="#">RT</a> |  |  |  | 3     | 7.9E-1  | 1.0E0     |
| <input type="checkbox"/> | INTERPRO               | <a href="#">Protein-tyrosine phosphatase, receptor/non-receptor type</a>                | <a href="#">RT</a> |  |  |  | 3     | 8.7E-1  | 1.0E0     |
|                          | Annotation Cluster 140 | Enrichment Score: 0.62                                                                  | <b>G</b>           |  |  |  | Count | P_Value | Benjamini |
| <input type="checkbox"/> | UP_SEQ_FEATURE         | region of interest:Autoinhibitory domain                                                | <a href="#">RT</a> |  |  |  | 3     | 1.2E-1  | 1.0E0     |
| <input type="checkbox"/> | GOTERM_MF_ALL          | <a href="#">calmodulin-dependent protein kinase activity</a>                            | <a href="#">RT</a> |  |  |  | 4     | 1.8E-1  | 9.7E-1    |
| <input type="checkbox"/> | UP_SEQ_FEATURE         | region of interest:Calmodulin-binding                                                   | <a href="#">RT</a> |  |  |  | 5     | 6.5E-1  | 1.0E0     |
|                          | Annotation Cluster 141 | Enrichment Score: 0.59                                                                  | <b>G</b>           |  |  |  | Count | P_Value | Benjamini |
| <input type="checkbox"/> | UP_SEQ_FEATURE         | repeat:5                                                                                | <a href="#">RT</a> |  |  |  | 11    | 8.1E-2  | 1.0E0     |
| <input type="checkbox"/> | UP_SEQ_FEATURE         | repeat:2                                                                                | <a href="#">RT</a> |  |  |  | 17    | 1.0E-1  | 1.0E0     |
| <input type="checkbox"/> | UP_SEQ_FEATURE         | repeat:3                                                                                | <a href="#">RT</a> |  |  |  | 14    | 1.1E-1  | 1.0E0     |
| <input type="checkbox"/> | UP_SEQ_FEATURE         | repeat:4                                                                                | <a href="#">RT</a> |  |  |  | 12    | 1.1E-1  | 1.0E0     |
| <input type="checkbox"/> | UP_SEQ_FEATURE         | repeat:1                                                                                | <a href="#">RT</a> |  |  |  | 16    | 1.4E-1  | 1.0E0     |
| <input type="checkbox"/> | UP_SEQ_FEATURE         | repeat:6                                                                                | <a href="#">RT</a> |  |  |  | 8     | 2.8E-1  | 1.0E0     |
| <input type="checkbox"/> | UP_SEQ_FEATURE         | repeat:11                                                                               | <a href="#">RT</a> |  |  |  | 5     | 3.3E-1  | 1.0E0     |
| <input type="checkbox"/> | UP_SEQ_FEATURE         | repeat:8                                                                                | <a href="#">RT</a> |  |  |  | 6     | 3.6E-1  | 1.0E0     |
| <input type="checkbox"/> | UP_SEQ_FEATURE         | repeat:10                                                                               | <a href="#">RT</a> |  |  |  | 5     | 3.8E-1  | 1.0E0     |
| <input type="checkbox"/> | UP_SEQ_FEATURE         | repeat:9                                                                                | <a href="#">RT</a> |  |  |  | 5     | 3.8E-1  | 1.0E0     |
| <input type="checkbox"/> | UP_SEQ_FEATURE         | repeat:13                                                                               | <a href="#">RT</a> |  |  |  | 4     | 4.6E-1  | 1.0E0     |

| <input type="checkbox"/> | UP_SEQ_FEATURE         | repeat:12                                                                | <a href="#">RT</a> |  |  |  |  | 4     | 4.6E-1  | 1.0E0     |
|--------------------------|------------------------|--------------------------------------------------------------------------|--------------------|--|--|--|--|-------|---------|-----------|
| <input type="checkbox"/> | UP_SEQ_FEATURE         | repeat:7                                                                 | <a href="#">RT</a> |  |  |  |  | 6     | 5.3E-1  | 1.0E0     |
| <input type="checkbox"/> | UP_SEQ_FEATURE         | repeat:14                                                                | <a href="#">RT</a> |  |  |  |  | 3     | 6.8E-1  | 1.0E0     |
|                          | Annotation Cluster 142 | Enrichment Score: 0.59                                                   | <b>G</b>           |  |  |  |  | Count | P_Value | Benjamini |
| <input type="checkbox"/> | BIOCARTA               | <a href="#">Cell Cycle</a>                                               | <a href="#">RT</a> |  |  |  |  | 6     | 1.6E-1  | 9.1E-1    |
| <input type="checkbox"/> | BIOCARTA               | <a href="#">Role of BRCA1, BRCA2 and ATR in Cancer Susceptibility</a>    | <a href="#">RT</a> |  |  |  |  | 5     | 2.4E-1  | 9.2E-1    |
| <input type="checkbox"/> | BIOCARTA               | <a href="#">ATM Signaling Pathway</a>                                    | <a href="#">RT</a> |  |  |  |  | 4     | 4.7E-1  | 9.7E-1    |
|                          | Annotation Cluster 143 | Enrichment Score: 0.59                                                   | <b>G</b>           |  |  |  |  | Count | P_Value | Benjamini |
| <input type="checkbox"/> | INTERPRO               | <a href="#">Pre-ATP-grasp fold</a>                                       | <a href="#">RT</a> |  |  |  |  | 3     | 1.5E-1  | 1.0E0     |
| <input type="checkbox"/> | INTERPRO               | <a href="#">ATP-grasp fold</a>                                           | <a href="#">RT</a> |  |  |  |  | 3     | 3.2E-1  | 1.0E0     |
| <input type="checkbox"/> | INTERPRO               | <a href="#">ATP-grasp fold, subdomain 2</a>                              | <a href="#">RT</a> |  |  |  |  | 3     | 3.6E-1  | 1.0E0     |
|                          | Annotation Cluster 144 | Enrichment Score: 0.58                                                   | <b>G</b>           |  |  |  |  | Count | P_Value | Benjamini |
| <input type="checkbox"/> | GOTERM_BP_ALL          | <a href="#">I-kappaB kinase/NF-kappaB cascade</a>                        | <a href="#">RT</a> |  |  |  |  | 10    | 1.6E-1  | 9.3E-1    |
| <input type="checkbox"/> | GOTERM_BP_ALL          | <a href="#">positive regulation of I-kappaB kinase/NF-kappaB cascade</a> | <a href="#">RT</a> |  |  |  |  | 7     | 1.7E-1  | 9.3E-1    |
| <input type="checkbox"/> | GOTERM_BP_ALL          | <a href="#">regulation of I-kappaB kinase/NF-kappaB cascade</a>          | <a href="#">RT</a> |  |  |  |  | 7     | 2.0E-1  | 9.5E-1    |
| <input type="checkbox"/> | GOTERM_BP_ALL          | <a href="#">positive regulation of signal transduction</a>               | <a href="#">RT</a> |  |  |  |  | 8     | 8.9E-1  | 1.0E0     |
|                          | Annotation Cluster 145 | Enrichment Score: 0.57                                                   | <b>G</b>           |  |  |  |  | Count | P_Value | Benjamini |
| <input type="checkbox"/> | GOTERM_BP_ALL          | <a href="#">cell death</a>                                               | <a href="#">RT</a> |  |  |  |  | 82    | 5.7E-2  | 7.2E-1    |
| <input type="checkbox"/> | GOTERM_BP_ALL          | <a href="#">death</a>                                                    | <a href="#">RT</a> |  |  |  |  | 82    | 5.7E-2  | 7.2E-1    |
| <input type="checkbox"/> | SP_PIR_KEYWORDS        | <a href="#">apoptosis</a>                                                | <a href="#">RT</a> |  |  |  |  | 32    | 9.2E-2  | 5.6E-1    |
| <input type="checkbox"/> | GOTERM_BP_ALL          | <a href="#">programmed cell death</a>                                    | <a href="#">RT</a> |  |  |  |  | 77    | 1.0E-1  | 8.4E-1    |
| <input type="checkbox"/> | GOTERM_BP_ALL          | <a href="#">apoptosis</a>                                                | <a href="#">RT</a> |  |  |  |  | 75    | 1.2E-1  | 8.7E-1    |
| <input type="checkbox"/> | GOTERM_BP_ALL          | <a href="#">regulation of programmed cell death</a>                      | <a href="#">RT</a> |  |  |  |  | 47    | 4.1E-1  | 1.0E0     |
| <input type="checkbox"/> | GOTERM_BP_ALL          | <a href="#">regulation of apoptosis</a>                                  | <a href="#">RT</a> |  |  |  |  | 46    | 4.3E-1  | 1.0E0     |
| <input type="checkbox"/> | GOTERM_BP_ALL          | <a href="#">cell development</a>                                         | <a href="#">RT</a> |  |  |  |  | 106   | 8.9E-1  | 1.0E0     |
| <input type="checkbox"/> | GOTERM_BP_ALL          | <a href="#">cell differentiation</a>                                     | <a href="#">RT</a> |  |  |  |  | 149   | 9.9E-1  | 1.0E0     |
| <input type="checkbox"/> | GOTERM_BP_ALL          | <a href="#">cellular developmental process</a>                           | <a href="#">RT</a> |  |  |  |  | 149   | 9.9E-1  | 1.0E0     |
| <input type="checkbox"/> | GOTERM_BP_ALL          | <a href="#">developmental process</a>                                    | <a href="#">RT</a> |  |  |  |  | 226   | 1.0E0   | 1.0E0     |
|                          | Annotation Cluster 146 | Enrichment Score: 0.55                                                   | <b>G</b>           |  |  |  |  | Count | P_Value | Benjamini |
| <input type="checkbox"/> | GOTERM_BP_ALL          | <a href="#">methylation-dependent chromatin silencing</a>                | <a href="#">RT</a> |  |  |  |  | 3     | 7.3E-2  | 7.7E-1    |
| <input type="checkbox"/> | GOTERM_BP_ALL          | <a href="#">chromatin remodeling</a>                                     | <a href="#">RT</a> |  |  |  |  | 9     | 7.7E-2  | 7.8E-1    |
| <input type="checkbox"/> | GOTERM_BP_ALL          | <a href="#">regulation of gene expression, epigenetic</a>                | <a href="#">RT</a> |  |  |  |  | 8     | 2.7E-1  | 9.8E-1    |
| <input type="checkbox"/> | GOTERM_BP_ALL          | <a href="#">covalent chromatin modification</a>                          | <a href="#">RT</a> |  |  |  |  | 7     | 3.1E-1  | 9.9E-1    |
| <input type="checkbox"/> | GOTERM_BP_ALL          | <a href="#">gene silencing</a>                                           | <a href="#">RT</a> |  |  |  |  | 5     | 4.4E-1  | 1.0E0     |
| <input type="checkbox"/> | GOTERM_BP_ALL          | <a href="#">chromatin silencing</a>                                      | <a href="#">RT</a> |  |  |  |  | 3     | 4.5E-1  | 1.0E0     |
| <input type="checkbox"/> | GOTERM_BP_ALL          | <a href="#">heterochromatin formation</a>                                | <a href="#">RT</a> |  |  |  |  | 3     | 4.5E-1  | 1.0E0     |
| <input type="checkbox"/> | GOTERM_BP_ALL          | <a href="#">chromatin assembly</a>                                       | <a href="#">RT</a> |  |  |  |  | 8     | 5.1E-1  | 1.0E0     |
| <input type="checkbox"/> | GOTERM_BP_ALL          | <a href="#">negative regulation of gene expression, epigenetic</a>       | <a href="#">RT</a> |  |  |  |  | 3     | 5.4E-1  | 1.0E0     |
|                          | Annotation Cluster 147 | Enrichment Score: 0.53                                                   | <b>G</b>           |  |  |  |  | Count | P_Value | Benjamini |
| <input type="checkbox"/> | SP_PIR_KEYWORDS        | <a href="#">blocked amino end</a>                                        | <a href="#">RT</a> |  |  |  |  | 8     | 7.0E-2  | 4.8E-1    |
| <input type="checkbox"/> | SMART                  | <a href="#">ARF</a>                                                      | <a href="#">RT</a> |  |  |  |  | 4     | 2.0E-1  | 9.9E-1    |
| <input type="checkbox"/> | SP_PIR_KEYWORDS        | <a href="#">myristylation</a>                                            | <a href="#">RT</a> |  |  |  |  | 5     | 2.5E-1  | 8.6E-1    |
| <input type="checkbox"/> | INTERPRO               | <a href="#">ADP-ribosylation factor</a>                                  | <a href="#">RT</a> |  |  |  |  | 4     | 2.6E-1  | 1.0E0     |
| <input type="checkbox"/> | INTERPRO               | <a href="#">ARF/SAR superfamily</a>                                      | <a href="#">RT</a> |  |  |  |  | 4     | 4.6E-1  | 1.0E0     |
| <input type="checkbox"/> | PIR_SUPERFAMILY        | PIRSF001711:ADP-ribosylation factor                                      | <a href="#">RT</a> |  |  |  |  | 4     | 5.1E-1  | 1.0E0     |
| <input type="checkbox"/> | UP_SEQ_FEATURE         | lipid moiety-binding region:N-myristoyl glycine                          | <a href="#">RT</a> |  |  |  |  | 5     | 9.6E-1  | 1.0E0     |
|                          | Annotation Cluster 148 | Enrichment Score: 0.52                                                   | <b>G</b>           |  |  |  |  | Count | P_Value | Benjamini |
| <input type="checkbox"/> | GOTERM_BP_ALL          | <a href="#">cellular response to stimulus</a>                            | <a href="#">RT</a> |  |  |  |  | 6     | 1.5E-1  | 9.1E-1    |

| <input type="checkbox"/> | Term            | Score                                                                          | RT | Count | P_Value | Benjamini |           |
|--------------------------|-----------------|--------------------------------------------------------------------------------|----|-------|---------|-----------|-----------|
| <input type="checkbox"/> | GOTERM_BP_ALL   | <a href="#">cellular response to extracellular stimulus</a>                    | RT | 3     | 3.1E-1  | 9.9E-1    |           |
| <input type="checkbox"/> | GOTERM_BP_ALL   | <a href="#">response to extracellular stimulus</a>                             | RT | 3     | 6.0E-1  | 1.0E0     |           |
| Annotation Cluster 149   |                 | Enrichment Score: 0.5                                                          | G  |       | Count   | P_Value   | Benjamini |
| <input type="checkbox"/> | GOTERM_CC_ALL   | <a href="#">ruffle</a>                                                         | RT | 9     | 6.4E-2  | 4.1E-1    |           |
| <input type="checkbox"/> | GOTERM_CC_ALL   | <a href="#">leading edge</a>                                                   | RT | 10    | 5.2E-1  | 9.7E-1    |           |
| <input type="checkbox"/> | GOTERM_CC_ALL   | <a href="#">cell projection</a>                                                | RT | 26    | 9.8E-1  | 1.0E0     |           |
| Annotation Cluster 150   |                 | Enrichment Score: 0.49                                                         | G  |       | Count   | P_Value   | Benjamini |
| <input type="checkbox"/> | INTERPRO        | <a href="#">Mitochondrial brown fat uncoupling protein</a>                     | RT | 4     | 8.3E-2  | 1.0E0     |           |
| <input type="checkbox"/> | INTERPRO        | <a href="#">Mitochondrial substrate carrier</a>                                | RT | 6     | 2.8E-1  | 1.0E0     |           |
| <input type="checkbox"/> | UP_SEQ_FEATURE  | repeat:Solcar 2                                                                | RT | 4     | 4.0E-1  | 1.0E0     |           |
| <input type="checkbox"/> | UP_SEQ_FEATURE  | repeat:Solcar 1                                                                | RT | 4     | 4.0E-1  | 1.0E0     |           |
| <input type="checkbox"/> | INTERPRO        | <a href="#">Mitochondrial carrier protein</a>                                  | RT | 4     | 4.3E-1  | 1.0E0     |           |
| <input type="checkbox"/> | UP_SEQ_FEATURE  | repeat:Solcar 3                                                                | RT | 3     | 6.6E-1  | 1.0E0     |           |
| Annotation Cluster 151   |                 | Enrichment Score: 0.49                                                         | G  |       | Count   | P_Value   | Benjamini |
| <input type="checkbox"/> | GOTERM_CC_ALL   | <a href="#">nuclear lamina</a>                                                 | RT | 4     | 4.1E-2  | 3.0E-1    |           |
| <input type="checkbox"/> | INTERPRO        | <a href="#">Intermediate filament, C-terminal</a>                              | RT | 3     | 4.2E-2  | 9.9E-1    |           |
| <input type="checkbox"/> | GOTERM_CC_ALL   | <a href="#">lamin filament</a>                                                 | RT | 3     | 6.8E-2  | 4.2E-1    |           |
| <input type="checkbox"/> | BIOCARTA        | <a href="#">Caspase Cascade in Apoptosis</a>                                   | RT | 6     | 1.8E-1  | 9.2E-1    |           |
| <input type="checkbox"/> | GOTERM_CC_ALL   | <a href="#">nuclear inner membrane</a>                                         | RT | 3     | 2.3E-1  | 7.7E-1    |           |
| <input type="checkbox"/> | BIOCARTA        | <a href="#">TNFR1 Signaling Pathway</a>                                        | RT | 6     | 3.4E-1  | 9.5E-1    |           |
| <input type="checkbox"/> | BIOCARTA        | <a href="#">FAS signaling pathway ( CD95 )</a>                                 | RT | 6     | 3.6E-1  | 9.5E-1    |           |
| <input type="checkbox"/> | SP_PIR_KEYWORDS | <a href="#">intermediate filament</a>                                          | RT | 5     | 8.5E-1  | 1.0E0     |           |
| <input type="checkbox"/> | PIR_SUPERFAMILY | PIRSF002282:cytoskeletal keratin                                               | RT | 4     | 9.0E-1  | 1.0E0     |           |
| <input type="checkbox"/> | INTERPRO        | <a href="#">Intermediate filament protein</a>                                  | RT | 4     | 9.4E-1  | 1.0E0     |           |
| <input type="checkbox"/> | GOTERM_CC_ALL   | <a href="#">intermediate filament</a>                                          | RT | 6     | 9.8E-1  | 1.0E0     |           |
| <input type="checkbox"/> | GOTERM_CC_ALL   | <a href="#">intermediate filament cytoskeleton</a>                             | RT | 6     | 9.8E-1  | 1.0E0     |           |
| <input type="checkbox"/> | KEGG_PATHWAY    | <a href="#">Cell Communication</a>                                             | RT | 6     | 1.0E0   | 1.0E0     |           |
| Annotation Cluster 152   |                 | Enrichment Score: 0.49                                                         | G  |       | Count   | P_Value   | Benjamini |
| <input type="checkbox"/> | GOTERM_MF_ALL   | <a href="#">general RNA polymerase II transcription factor activity</a>        | RT | 4     | 1.5E-1  | 9.6E-1    |           |
| <input type="checkbox"/> | KEGG_PATHWAY    | <a href="#">Basal transcription factors</a>                                    | RT | 6     | 2.9E-1  | 8.3E-1    |           |
| <input type="checkbox"/> | GOTERM_MF_ALL   | <a href="#">RNA polymerase II transcription factor activity</a>                | RT | 8     | 7.6E-1  | 1.0E0     |           |
| Annotation Cluster 153   |                 | Enrichment Score: 0.49                                                         | G  |       | Count   | P_Value   | Benjamini |
| <input type="checkbox"/> | GOTERM_BP_ALL   | <a href="#">ER-nuclear signaling pathway</a>                                   | RT | 6     | 9.1E-2  | 8.1E-1    |           |
| <input type="checkbox"/> | BIOCARTA        | <a href="#">Cadmium induces DNA synthesis and proliferation in macrophages</a> | RT | 5     | 1.5E-1  | 9.2E-1    |           |
| <input type="checkbox"/> | GOTERM_BP_ALL   | <a href="#">cell aging</a>                                                     | RT | 4     | 2.4E-1  | 9.7E-1    |           |
| <input type="checkbox"/> | BIOCARTA        | <a href="#">BTG family proteins and cell cycle regulation</a>                  | RT | 4     | 2.4E-1  | 9.1E-1    |           |
| <input type="checkbox"/> | KEGG_PATHWAY    | <a href="#">Thyroid cancer</a>                                                 | RT | 6     | 2.7E-1  | 8.2E-1    |           |
| <input type="checkbox"/> | BIOCARTA        | <a href="#">WNT Signaling Pathway</a>                                          | RT | 5     | 4.3E-1  | 9.7E-1    |           |
| <input type="checkbox"/> | BIOCARTA        | <a href="#">Regulation of transcriptional activity by PML</a>                  | RT | 4     | 5.1E-1  | 9.7E-1    |           |
| <input type="checkbox"/> | GOTERM_BP_ALL   | <a href="#">aging</a>                                                          | RT | 4     | 5.7E-1  | 1.0E0     |           |
| <input type="checkbox"/> | KEGG_PATHWAY    | <a href="#">Endometrial cancer</a>                                             | RT | 7     | 6.0E-1  | 9.6E-1    |           |
| <input type="checkbox"/> | KEGG_PATHWAY    | <a href="#">Acute myeloid leukemia</a>                                         | RT | 6     | 8.6E-1  | 1.0E0     |           |
| Annotation Cluster 154   |                 | Enrichment Score: 0.46                                                         | G  |       | Count   | P_Value   | Benjamini |
| <input type="checkbox"/> | GOTERM_CC_ALL   | <a href="#">vesicle coat</a>                                                   | RT | 9     | 6.4E-2  | 4.1E-1    |           |
| <input type="checkbox"/> | GOTERM_CC_ALL   | <a href="#">coated vesicle membrane</a>                                        | RT | 9     | 8.6E-2  | 4.7E-1    |           |
| <input type="checkbox"/> | GOTERM_CC_ALL   | <a href="#">cytoplasmic vesicle membrane</a>                                   | RT | 10    | 1.5E-1  | 6.6E-1    |           |
| <input type="checkbox"/> | GOTERM_CC_ALL   | <a href="#">coated membrane</a>                                                | RT | 9     | 1.5E-1  | 6.6E-1    |           |
| <input type="checkbox"/> | GOTERM_CC_ALL   | <a href="#">membrane coat</a>                                                  | RT | 9     | 1.5E-1  | 6.6E-1    |           |

|                          |                 |                                                                     |                    |                                                                                       |       |         |           |
|--------------------------|-----------------|---------------------------------------------------------------------|--------------------|---------------------------------------------------------------------------------------|-------|---------|-----------|
| <input type="checkbox"/> | GOTERM_CC_ALL   | <a href="#">clathrin vesicle coat</a>                               | <a href="#">RT</a> |                                                                                       | 6     | 1.9E-1  | 7.2E-1    |
| <input type="checkbox"/> | UP_SEQ_FEATURE  | domain:MHD                                                          | <a href="#">RT</a> |                                                                                       | 3     | 2.0E-1  | 1.0E0     |
| <input type="checkbox"/> | GOTERM_CC_ALL   | <a href="#">clathrin adaptor complex</a>                            | <a href="#">RT</a> |                                                                                       | 5     | 2.0E-1  | 7.5E-1    |
| <input type="checkbox"/> | GOTERM_CC_ALL   | <a href="#">AP-type membrane coat adaptor complex</a>               | <a href="#">RT</a> |                                                                                       | 5     | 2.0E-1  | 7.5E-1    |
| <input type="checkbox"/> | SP_PIR_KEYWORDS | <a href="#">coated pit</a>                                          | <a href="#">RT</a> |                                                                                       | 5     | 2.1E-1  | 8.2E-1    |
| <input type="checkbox"/> | INTERPRO        | <a href="#">Clathrin adaptor, mu subunit, C-terminal</a>            | <a href="#">RT</a> |                                                                                       | 3     | 2.2E-1  | 1.0E0     |
| <input type="checkbox"/> | GOTERM_CC_ALL   | <a href="#">clathrin coated vesicle membrane</a>                    | <a href="#">RT</a> |                                                                                       | 6     | 2.2E-1  | 7.7E-1    |
| <input type="checkbox"/> | GOTERM_CC_ALL   | <a href="#">clathrin coat</a>                                       | <a href="#">RT</a> |                                                                                       | 6     | 2.6E-1  | 8.1E-1    |
| <input type="checkbox"/> | GOTERM_CC_ALL   | <a href="#">cytoplasmic vesicle part</a>                            | <a href="#">RT</a> |                                                                                       | 10    | 2.6E-1  | 8.1E-1    |
| <input type="checkbox"/> | GOTERM_CC_ALL   | <a href="#">vesicle membrane</a>                                    | <a href="#">RT</a> |                                                                                       | 11    | 2.6E-1  | 8.1E-1    |
| <input type="checkbox"/> | GOTERM_BP_ALL   | <a href="#">protein complex assembly</a>                            | <a href="#">RT</a> |                                                                                       | 19    | 3.3E-1  | 9.9E-1    |
| <input type="checkbox"/> | INTERPRO        | <a href="#">Clathrin/coatomer adaptor, adaptin-like, N-terminal</a> | <a href="#">RT</a> |                                                                                       | 3     | 3.6E-1  | 1.0E0     |
| <input type="checkbox"/> | GOTERM_CC_ALL   | <a href="#">transport vesicle membrane</a>                          | <a href="#">RT</a> |                                                                                       | 4     | 4.0E-1  | 9.2E-1    |
| <input type="checkbox"/> | GOTERM_CC_ALL   | <a href="#">coated pit</a>                                          | <a href="#">RT</a> |                                                                                       | 6     | 4.0E-1  | 9.2E-1    |
| <input type="checkbox"/> | GOTERM_CC_ALL   | <a href="#">Golgi-associated vesicle membrane</a>                   | <a href="#">RT</a> |                                                                                       | 4     | 4.2E-1  | 9.3E-1    |
| <input type="checkbox"/> | GOTERM_CC_ALL   | <a href="#">Golgi-associated vesicle</a>                            | <a href="#">RT</a> |                                                                                       | 6     | 4.6E-1  | 9.5E-1    |
| <input type="checkbox"/> | GOTERM_CC_ALL   | <a href="#">clathrin coat of trans-Golgi network vesicle</a>        | <a href="#">RT</a> |                                                                                       | 3     | 4.9E-1  | 9.6E-1    |
| <input type="checkbox"/> | GOTERM_CC_ALL   | <a href="#">trans-Golgi network transport vesicle membrane</a>      | <a href="#">RT</a> |                                                                                       | 3     | 5.2E-1  | 9.7E-1    |
| <input type="checkbox"/> | GOTERM_CC_ALL   | <a href="#">transport vesicle</a>                                   | <a href="#">RT</a> |                                                                                       | 5     | 5.7E-1  | 9.8E-1    |
| <input type="checkbox"/> | GOTERM_CC_ALL   | <a href="#">coated vesicle</a>                                      | <a href="#">RT</a> |                                                                                       | 11    | 6.7E-1  | 9.9E-1    |
| <input type="checkbox"/> | GOTERM_CC_ALL   | <a href="#">Golgi apparatus part</a>                                | <a href="#">RT</a> |                                                                                       | 15    | 7.1E-1  | 9.9E-1    |
| <input type="checkbox"/> | GOTERM_CC_ALL   | <a href="#">trans-Golgi network transport vesicle</a>               | <a href="#">RT</a> |                                                                                       | 3     | 7.2E-1  | 9.9E-1    |
| <input type="checkbox"/> | GOTERM_CC_ALL   | <a href="#">cytoplasmic membrane-bound vesicle</a>                  | <a href="#">RT</a> |                                                                                       | 19    | 8.3E-1  | 1.0E0     |
| <input type="checkbox"/> | GOTERM_CC_ALL   | <a href="#">clathrin-coated vesicle</a>                             | <a href="#">RT</a> |                                                                                       | 8     | 8.4E-1  | 1.0E0     |
| <input type="checkbox"/> | GOTERM_CC_ALL   | <a href="#">cytoplasmic vesicle</a>                                 | <a href="#">RT</a> |                                                                                       | 26    | 8.7E-1  | 1.0E0     |
| <input type="checkbox"/> | GOTERM_CC_ALL   | <a href="#">membrane-bound vesicle</a>                              | <a href="#">RT</a> |                                                                                       | 19    | 8.7E-1  | 1.0E0     |
| <input type="checkbox"/> | GOTERM_CC_ALL   | <a href="#">vesicle</a>                                             | <a href="#">RT</a> |                                                                                       | 26    | 9.0E-1  | 1.0E0     |
| <input type="checkbox"/> | GOTERM_CC_ALL   | <a href="#">Golgi membrane</a>                                      | <a href="#">RT</a> |                                                                                       | 6     | 9.6E-1  | 1.0E0     |
| Annotation Cluster 155   |                 | Enrichment Score: 0.46                                              | <b>G</b>           |  | Count | P_Value | Benjamini |
| <input type="checkbox"/> | UP_SEQ_FEATURE  | repeat:ARM 2                                                        | <a href="#">RT</a> |                                                                                       | 5     | 1.7E-1  | 1.0E0     |
| <input type="checkbox"/> | UP_SEQ_FEATURE  | repeat:ARM 3                                                        | <a href="#">RT</a> |                                                                                       | 5     | 1.7E-1  | 1.0E0     |
| <input type="checkbox"/> | UP_SEQ_FEATURE  | repeat:ARM 4                                                        | <a href="#">RT</a> |                                                                                       | 4     | 2.6E-1  | 1.0E0     |
| <input type="checkbox"/> | UP_SEQ_FEATURE  | repeat:ARM 8                                                        | <a href="#">RT</a> |                                                                                       | 3     | 3.6E-1  | 1.0E0     |
| <input type="checkbox"/> | SMART           | <a href="#">ARM</a>                                                 | <a href="#">RT</a> |                                                                                       | 4     | 4.0E-1  | 1.0E0     |
| <input type="checkbox"/> | UP_SEQ_FEATURE  | repeat:ARM 6                                                        | <a href="#">RT</a> |                                                                                       | 3     | 4.4E-1  | 1.0E0     |
| <input type="checkbox"/> | UP_SEQ_FEATURE  | repeat:ARM 7                                                        | <a href="#">RT</a> |                                                                                       | 3     | 4.4E-1  | 1.0E0     |
| <input type="checkbox"/> | UP_SEQ_FEATURE  | repeat:ARM 5                                                        | <a href="#">RT</a> |                                                                                       | 3     | 4.7E-1  | 1.0E0     |
| <input type="checkbox"/> | UP_SEQ_FEATURE  | repeat:ARM 1                                                        | <a href="#">RT</a> |                                                                                       | 3     | 5.1E-1  | 1.0E0     |
| <input type="checkbox"/> | INTERPRO        | <a href="#">Armadillo</a>                                           | <a href="#">RT</a> |                                                                                       | 4     | 5.3E-1  | 1.0E0     |
| Annotation Cluster 156   |                 | Enrichment Score: 0.46                                              | <b>G</b>           |  | Count | P_Value | Benjamini |
| <input type="checkbox"/> | SP_PIR_KEYWORDS | <a href="#">GTP-binding</a>                                         | <a href="#">RT</a> |                                                                                       | 39    | 7.4E-3  | 1.0E-1    |
| <input type="checkbox"/> | UP_SEQ_FEATURE  | nucleotide phosphate-binding region:GTP                             | <a href="#">RT</a> |                                                                                       | 29    | 6.6E-2  | 1.0E0     |
| <input type="checkbox"/> | INTERPRO        | <a href="#">Small GTP-binding protein domain</a>                    | <a href="#">RT</a> |                                                                                       | 17    | 2.0E-1  | 1.0E0     |
| <input type="checkbox"/> | SMART           | <a href="#">RHO</a>                                                 | <a href="#">RT</a> |                                                                                       | 3     | 4.6E-1  | 1.0E0     |
| <input type="checkbox"/> | INTERPRO        | <a href="#">Ras GTPase</a>                                          | <a href="#">RT</a> |                                                                                       | 14    | 5.1E-1  | 1.0E0     |
| <input type="checkbox"/> | SP_PIR_KEYWORDS | <a href="#">prenylation</a>                                         | <a href="#">RT</a> |                                                                                       | 14    | 5.2E-1  | 9.8E-1    |
| <input type="checkbox"/> | INTERPRO        | <a href="#">Ras small GTPase, Rho type</a>                          | <a href="#">RT</a> |                                                                                       | 3     | 5.7E-1  | 1.0E0     |
| <input type="checkbox"/> | INTERPRO        | <a href="#">Ras</a>                                                 | <a href="#">RT</a> |                                                                                       | 11    | 5.7E-1  | 1.0E0     |

|                          |                 |                                                                          |                    |  |       |         |           |
|--------------------------|-----------------|--------------------------------------------------------------------------|--------------------|--|-------|---------|-----------|
| <input type="checkbox"/> | UP_SEQ_FEATURE  | short sequence motif:Effector region                                     | <a href="#">RT</a> |  | 7     | 8.7E-1  | 1.0E0     |
| <input type="checkbox"/> | UP_SEQ_FEATURE  | lipid moiety-binding region:S-geranylgeranyl cysteine                    | <a href="#">RT</a> |  | 6     | 9.5E-1  | 1.0E0     |
| <input type="checkbox"/> | GOTERM_BP_ALL   | <a href="#">small GTPase mediated signal transduction</a>                | <a href="#">RT</a> |  | 28    | 9.8E-1  | 1.0E0     |
| <input type="checkbox"/> | UP_SEQ_FEATURE  | propeptide:Removed in mature form                                        | <a href="#">RT</a> |  | 6     | 1.0E0   | 1.0E0     |
| Annotation Cluster 157   |                 | Enrichment Score: 0.46                                                   | <b>G</b>           |  | Count | P_Value | Benjamini |
| <input type="checkbox"/> | GOTERM_MF_ALL   | <a href="#">tumor necrosis factor receptor superfamily binding</a>       | <a href="#">RT</a> |  | 4     | 3.0E-1  | 1.0E0     |
| <input type="checkbox"/> | GOTERM_MF_ALL   | <a href="#">tumor necrosis factor receptor binding</a>                   | <a href="#">RT</a> |  | 4     | 3.0E-1  | 1.0E0     |
| <input type="checkbox"/> | SMART           | <a href="#">TNF</a>                                                      | <a href="#">RT</a> |  | 3     | 3.6E-1  | 1.0E0     |
| <input type="checkbox"/> | INTERPRO        | <a href="#">Tumor Necrosis Factor</a>                                    | <a href="#">RT</a> |  | 3     | 4.5E-1  | 1.0E0     |
| Annotation Cluster 158   |                 | Enrichment Score: 0.46                                                   | <b>G</b>           |  | Count | P_Value | Benjamini |
| <input type="checkbox"/> | GOTERM_BP_ALL   | <a href="#">pigment metabolic process</a>                                | <a href="#">RT</a> |  | 7     | 1.3E-1  | 8.9E-1    |
| <input type="checkbox"/> | GOTERM_BP_ALL   | <a href="#">pigment biosynthetic process</a>                             | <a href="#">RT</a> |  | 6     | 1.6E-1  | 9.3E-1    |
| <input type="checkbox"/> | GOTERM_BP_ALL   | <a href="#">secondary metabolic process</a>                              | <a href="#">RT</a> |  | 7     | 3.6E-1  | 9.9E-1    |
| <input type="checkbox"/> | GOTERM_BP_ALL   | <a href="#">heme metabolic process</a>                                   | <a href="#">RT</a> |  | 3     | 5.7E-1  | 1.0E0     |
| <input type="checkbox"/> | GOTERM_BP_ALL   | <a href="#">porphyrin metabolic process</a>                              | <a href="#">RT</a> |  | 3     | 6.5E-1  | 1.0E0     |
| <input type="checkbox"/> | GOTERM_BP_ALL   | <a href="#">tetrapyrrole metabolic process</a>                           | <a href="#">RT</a> |  | 3     | 6.5E-1  | 1.0E0     |
| Annotation Cluster 159   |                 | Enrichment Score: 0.45                                                   | <b>G</b>           |  | Count | P_Value | Benjamini |
| <input type="checkbox"/> | SMART           | <a href="#">UBCc</a>                                                     | <a href="#">RT</a> |  | 9     | 2.5E-2  | 6.9E-1    |
| <input type="checkbox"/> | INTERPRO        | <a href="#">Ubiquitin-conjugating enzyme, E2</a>                         | <a href="#">RT</a> |  | 8     | 9.9E-2  | 1.0E0     |
| <input type="checkbox"/> | GOTERM_MF_ALL   | <a href="#">ligase activity, forming carbon-nitrogen bonds</a>           | <a href="#">RT</a> |  | 21    | 2.2E-1  | 9.9E-1    |
| <input type="checkbox"/> | PIR_SUPERFAMILY | PIRSF001567:ubiquitin-protein ligase E2                                  | <a href="#">RT</a> |  | 4     | 2.7E-1  | 1.0E0     |
| <input type="checkbox"/> | UP_SEQ_FEATURE  | active site:Glycyl thioester intermediate                                | <a href="#">RT</a> |  | 5     | 5.0E-1  | 1.0E0     |
| <input type="checkbox"/> | KEGG_PATHWAY    | <a href="#">Ubiquitin mediated proteolysis</a>                           | <a href="#">RT</a> |  | 15    | 6.6E-1  | 9.7E-1    |
| <input type="checkbox"/> | GOTERM_MF_ALL   | <a href="#">acid-amino acid ligase activity</a>                          | <a href="#">RT</a> |  | 13    | 7.0E-1  | 1.0E0     |
| <input type="checkbox"/> | GOTERM_MF_ALL   | <a href="#">ubiquitin-protein ligase activity</a>                        | <a href="#">RT</a> |  | 11    | 7.1E-1  | 1.0E0     |
| <input type="checkbox"/> | KEGG_PATHWAY    | <a href="#">Parkinson's disease</a>                                      | <a href="#">RT</a> |  | 3     | 7.3E-1  | 9.8E-1    |
| <input type="checkbox"/> | GOTERM_MF_ALL   | <a href="#">small protein conjugating enzyme activity</a>                | <a href="#">RT</a> |  | 11    | 7.4E-1  | 1.0E0     |
| <input type="checkbox"/> | GOTERM_MF_ALL   | <a href="#">small conjugating protein ligase activity</a>                | <a href="#">RT</a> |  | 11    | 7.6E-1  | 1.0E0     |
| Annotation Cluster 160   |                 | Enrichment Score: 0.43                                                   | <b>G</b>           |  | Count | P_Value | Benjamini |
| <input type="checkbox"/> | SMART           | <a href="#">ANX</a>                                                      | <a href="#">RT</a> |  | 3     | 2.8E-1  | 1.0E0     |
| <input type="checkbox"/> | PIR_SUPERFAMILY | PIRSF002359:annexin I                                                    | <a href="#">RT</a> |  | 3     | 2.9E-1  | 1.0E0     |
| <input type="checkbox"/> | SP_PIR_KEYWORDS | <a href="#">annexin</a>                                                  | <a href="#">RT</a> |  | 3     | 3.4E-1  | 9.2E-1    |
| <input type="checkbox"/> | INTERPRO        | <a href="#">Annexin</a>                                                  | <a href="#">RT</a> |  | 3     | 3.6E-1  | 1.0E0     |
| <input type="checkbox"/> | SP_PIR_KEYWORDS | <a href="#">calcium/phospholipid-binding</a>                             | <a href="#">RT</a> |  | 3     | 3.7E-1  | 9.4E-1    |
| <input type="checkbox"/> | GOTERM_MF_ALL   | <a href="#">calcium-dependent phospholipid binding</a>                   | <a href="#">RT</a> |  | 3     | 6.8E-1  | 1.0E0     |
| Annotation Cluster 161   |                 | Enrichment Score: 0.43                                                   | <b>G</b>           |  | Count | P_Value | Benjamini |
| <input type="checkbox"/> | INTERPRO        | <a href="#">ABC transporter related</a>                                  | <a href="#">RT</a> |  | 7     | 8.4E-2  | 1.0E0     |
| <input type="checkbox"/> | UP_SEQ_FEATURE  | domain:ABC transporter 2                                                 | <a href="#">RT</a> |  | 3     | 5.4E-1  | 1.0E0     |
| <input type="checkbox"/> | UP_SEQ_FEATURE  | domain:ABC transporter 1                                                 | <a href="#">RT</a> |  | 3     | 5.4E-1  | 1.0E0     |
| <input type="checkbox"/> | UP_SEQ_FEATURE  | nucleotide phosphate-binding region:ATP 2                                | <a href="#">RT</a> |  | 3     | 5.4E-1  | 1.0E0     |
| <input type="checkbox"/> | UP_SEQ_FEATURE  | nucleotide phosphate-binding region:ATP 1                                | <a href="#">RT</a> |  | 3     | 5.4E-1  | 1.0E0     |
| Annotation Cluster 162   |                 | Enrichment Score: 0.43                                                   | <b>G</b>           |  | Count | P_Value | Benjamini |
| <input type="checkbox"/> | GOTERM_BP_ALL   | <a href="#">positive regulation of myeloid leukocyte differentiation</a> | <a href="#">RT</a> |  | 5     | 1.5E-2  | 3.7E-1    |
| <input type="checkbox"/> | GOTERM_BP_ALL   | <a href="#">positive regulation of osteoclast differentiation</a>        | <a href="#">RT</a> |  | 4     | 2.2E-2  | 4.6E-1    |
| <input type="checkbox"/> | GOTERM_BP_ALL   | <a href="#">positive regulation of myeloid cell differentiation</a>      | <a href="#">RT</a> |  | 6     | 3.4E-2  | 5.8E-1    |
| <input type="checkbox"/> | GOTERM_BP_ALL   | <a href="#">regulation of myeloid leukocyte differentiation</a>          | <a href="#">RT</a> |  | 6     | 7.9E-2  | 7.8E-1    |
| <input type="checkbox"/> | GOTERM_BP_ALL   | <a href="#">regulation of osteoclast differentiation</a>                 | <a href="#">RT</a> |  | 5     | 1.1E-1  | 8.6E-1    |



| <input type="checkbox"/> | Category        | Term                                                                          | RT       | Bar | Count | P_Value | Benjamini |
|--------------------------|-----------------|-------------------------------------------------------------------------------|----------|-----|-------|---------|-----------|
| <input type="checkbox"/> | GOTERM_BP_ALL   | <a href="#">regulation of myeloid cell differentiation</a>                    | RT       |     | 8     | 1.5E-1  | 9.1E-1    |
| <input type="checkbox"/> | GOTERM_BP_ALL   | <a href="#">myeloid leukocyte differentiation</a>                             | RT       |     | 8     | 1.9E-1  | 9.5E-1    |
| <input type="checkbox"/> | GOTERM_BP_ALL   | <a href="#">osteoclast differentiation</a>                                    | RT       |     | 5     | 2.0E-1  | 9.6E-1    |
| <input type="checkbox"/> | GOTERM_BP_ALL   | <a href="#">myeloid cell differentiation</a>                                  | RT       |     | 14    | 2.6E-1  | 9.8E-1    |
| <input type="checkbox"/> | GOTERM_BP_ALL   | <a href="#">hemopoiesis</a>                                                   | RT       |     | 24    | 5.4E-1  | 1.0E0     |
| <input type="checkbox"/> | GOTERM_BP_ALL   | <a href="#">positive regulation of developmental process</a>                  | RT       |     | 9     | 6.1E-1  | 1.0E0     |
| <input type="checkbox"/> | GOTERM_BP_ALL   | <a href="#">positive regulation of cell differentiation</a>                   | RT       |     | 6     | 6.6E-1  | 1.0E0     |
| <input type="checkbox"/> | GOTERM_BP_ALL   | <a href="#">immune system development</a>                                     | RT       |     | 26    | 6.9E-1  | 1.0E0     |
| <input type="checkbox"/> | GOTERM_BP_ALL   | <a href="#">hemopoietic or lymphoid organ development</a>                     | RT       |     | 24    | 7.2E-1  | 1.0E0     |
| <input type="checkbox"/> | GOTERM_BP_ALL   | <a href="#">leukocyte differentiation</a>                                     | RT       |     | 13    | 7.9E-1  | 1.0E0     |
| <input type="checkbox"/> | GOTERM_BP_ALL   | <a href="#">bone mineralization</a>                                           | RT       |     | 3     | 8.4E-1  | 1.0E0     |
| <input type="checkbox"/> | GOTERM_BP_ALL   | <a href="#">immune system process</a>                                         | RT       |     | 60    | 9.3E-1  | 1.0E0     |
| <input type="checkbox"/> | GOTERM_BP_ALL   | <a href="#">cartilage development</a>                                         | RT       |     | 3     | 9.8E-1  | 1.0E0     |
| <input type="checkbox"/> | GOTERM_BP_ALL   | <a href="#">ossification</a>                                                  | RT       |     | 6     | 9.8E-1  | 1.0E0     |
| <input type="checkbox"/> | GOTERM_BP_ALL   | <a href="#">biomineral formation</a>                                          | RT       |     | 6     | 9.8E-1  | 1.0E0     |
| <input type="checkbox"/> | GOTERM_BP_ALL   | <a href="#">bone remodeling</a>                                               | RT       |     | 6     | 9.9E-1  | 1.0E0     |
| <input type="checkbox"/> | GOTERM_BP_ALL   | <a href="#">regulation of cell differentiation</a>                            | RT       |     | 11    | 9.9E-1  | 1.0E0     |
| <input type="checkbox"/> | GOTERM_BP_ALL   | <a href="#">skeletal development</a>                                          | RT       |     | 11    | 9.9E-1  | 1.0E0     |
| <input type="checkbox"/> | GOTERM_BP_ALL   | <a href="#">regulation of developmental process</a>                           | RT       |     | 18    | 9.9E-1  | 1.0E0     |
| <input type="checkbox"/> | GOTERM_BP_ALL   | <a href="#">tissue development</a>                                            | RT       |     | 18    | 1.0E0   | 1.0E0     |
| <input type="checkbox"/> | GOTERM_BP_ALL   | <a href="#">tissue remodeling</a>                                             | RT       |     | 6     | 1.0E0   | 1.0E0     |
| Annotation Cluster 163   |                 | Enrichment Score: 0.41                                                        | <b>G</b> |     | Count | P_Value | Benjamini |
| <input type="checkbox"/> | INTERPRO        | <a href="#">Poly(ADP-ribose) polymerase, catalytic region</a>                 | RT       |     | 3     | 3.6E-1  | 1.0E0     |
| <input type="checkbox"/> | GOTERM_BP_ALL   | <a href="#">protein amino acid ADP-ribosylation</a>                           | RT       |     | 4     | 3.7E-1  | 9.9E-1    |
| <input type="checkbox"/> | GOTERM_MF_ALL   | <a href="#">NAD+ ADP-ribosyltransferase activity</a>                          | RT       |     | 3     | 4.4E-1  | 1.0E0     |
| Annotation Cluster 164   |                 | Enrichment Score: 0.41                                                        | <b>G</b> |     | Count | P_Value | Benjamini |
| <input type="checkbox"/> | GOTERM_BP_ALL   | <a href="#">in utero embryonic development</a>                                | RT       |     | 16    | 1.9E-1  | 9.5E-1    |
| <input type="checkbox"/> | GOTERM_BP_ALL   | <a href="#">chordate embryonic development</a>                                | RT       |     | 24    | 3.3E-1  | 9.9E-1    |
| <input type="checkbox"/> | GOTERM_BP_ALL   | <a href="#">embryonic development ending in birth or egg hatching</a>         | RT       |     | 24    | 3.6E-1  | 9.9E-1    |
| <input type="checkbox"/> | GOTERM_BP_ALL   | <a href="#">embryonic development</a>                                         | RT       |     | 34    | 9.5E-1  | 1.0E0     |
| Annotation Cluster 165   |                 | Enrichment Score: 0.41                                                        | <b>G</b> |     | Count | P_Value | Benjamini |
| <input type="checkbox"/> | GOTERM_MF_ALL   | <a href="#">protein dimerization activity</a>                                 | RT       |     | 32    | 1.6E-1  | 9.6E-1    |
| <input type="checkbox"/> | GOTERM_MF_ALL   | <a href="#">protein homodimerization activity</a>                             | RT       |     | 15    | 4.8E-1  | 1.0E0     |
| <input type="checkbox"/> | GOTERM_MF_ALL   | <a href="#">identical protein binding</a>                                     | RT       |     | 24    | 7.7E-1  | 1.0E0     |
| Annotation Cluster 166   |                 | Enrichment Score: 0.4                                                         | <b>G</b> |     | Count | P_Value | Benjamini |
| <input type="checkbox"/> | BIOCARTA        | <a href="#">How Progesterone Initiates the Oocyte Maturation</a>              | RT       |     | 10    | 1.6E-3  | 8.5E-2    |
| <input type="checkbox"/> | SP_PIR_KEYWORDS | <a href="#">GTP binding</a>                                                   | RT       |     | 9     | 4.0E-2  | 3.4E-1    |
| <input type="checkbox"/> | BIOCARTA        | <a href="#">Signaling Pathway from G-Protein Families</a>                     | RT       |     | 8     | 5.5E-2  | 6.8E-1    |
| <input type="checkbox"/> | GOTERM_CC_ALL   | <a href="#">heterotrimeric G-protein complex</a>                              | RT       |     | 7     | 1.2E-1  | 6.0E-1    |
| <input type="checkbox"/> | BIOCARTA        | <a href="#">Corticosteroids and cardioprotection</a>                          | RT       |     | 5     | 1.8E-1  | 9.3E-1    |
| <input type="checkbox"/> | INTERPRO        | <a href="#">Guanine nucleotide binding protein (G-protein), alpha subunit</a> | RT       |     | 4     | 1.9E-1  | 1.0E0     |
| <input type="checkbox"/> | SP_PIR_KEYWORDS | <a href="#">thiolester bond</a>                                               | RT       |     | 4     | 2.0E-1  | 8.1E-1    |
| <input type="checkbox"/> | BIOCARTA        | <a href="#">CCR3 signaling in Eosinophils</a>                                 | RT       |     | 6     | 2.0E-1  | 9.1E-1    |
| <input type="checkbox"/> | GOTERM_CC_ALL   | <a href="#">extrinsic to plasma membrane</a>                                  | RT       |     | 8     | 2.7E-1  | 8.1E-1    |
| <input type="checkbox"/> | BIOCARTA        | <a href="#">CXCR4 Signaling Pathway</a>                                       | RT       |     | 6     | 2.8E-1  | 9.4E-1    |
| <input type="checkbox"/> | BIOCARTA        | <a href="#">Activation of cAMP-dependent protein kinase, PKA</a>              | RT       |     | 3     | 2.9E-1  | 9.4E-1    |
| <input type="checkbox"/> | BIOCARTA        | <a href="#">Attenuation of GPCR Signaling</a>                                 | RT       |     | 3     | 2.9E-1  | 9.4E-1    |

|                          |                 |                                                                                                                   |                    |  |       |         |           |
|--------------------------|-----------------|-------------------------------------------------------------------------------------------------------------------|--------------------|--|-------|---------|-----------|
| <input type="checkbox"/> | BIOCARTA        | <a href="#">Roles of ?-arrestin-dependent Recruitment of Src Kinases in GPCR Signaling</a>                        | <a href="#">RT</a> |  | 5     | 3.3E-1  | 9.5E-1    |
| <input type="checkbox"/> | BIOCARTA        | <a href="#">ChREBP regulation by carbohydrates and cAMP</a>                                                       | <a href="#">RT</a> |  | 3     | 3.4E-1  | 9.4E-1    |
| <input type="checkbox"/> | INTERPRO        | <a href="#">G protein alpha subunit, helical insertion</a>                                                        | <a href="#">RT</a> |  | 3     | 3.9E-1  | 1.0E0     |
| <input type="checkbox"/> | SP_PIR_KEYWORDS | <a href="#">signal transduction</a>                                                                               | <a href="#">RT</a> |  | 3     | 4.1E-1  | 9.5E-1    |
| <input type="checkbox"/> | SP_PIR_KEYWORDS | <a href="#">heterotrimer</a>                                                                                      | <a href="#">RT</a> |  | 4     | 4.3E-1  | 9.6E-1    |
| <input type="checkbox"/> | BIOCARTA        | <a href="#">Erk1/Erk2 Mapk Signaling pathway</a>                                                                  | <a href="#">RT</a> |  | 6     | 4.8E-1  | 9.7E-1    |
| <input type="checkbox"/> | BIOCARTA        | <a href="#">?-arrestins in GPCR Desensitization</a>                                                               | <a href="#">RT</a> |  | 3     | 4.9E-1  | 9.7E-1    |
| <input type="checkbox"/> | PIR_SUPERFAMILY | PIRSF002400:GTP-binding regulatory protein Gs alpha chain                                                         | <a href="#">RT</a> |  | 3     | 4.9E-1  | 1.0E0     |
| <input type="checkbox"/> | GOTERM_CC_ALL   | <a href="#">extrinsic to membrane</a>                                                                             | <a href="#">RT</a> |  | 8     | 5.7E-1  | 9.8E-1    |
| <input type="checkbox"/> | BIOCARTA        | <a href="#">Transcription factor CREB and its extracellular signals</a>                                           | <a href="#">RT</a> |  | 4     | 6.1E-1  | 9.7E-1    |
| <input type="checkbox"/> | BIOCARTA        | <a href="#">fMLP induced chemokine gene expression in HMC-1 cells</a>                                             | <a href="#">RT</a> |  | 5     | 6.3E-1  | 9.8E-1    |
| <input type="checkbox"/> | BIOCARTA        | <a href="#">T Cell Receptor Signaling Pathway</a>                                                                 | <a href="#">RT</a> |  | 6     | 6.5E-1  | 9.8E-1    |
| <input type="checkbox"/> | BIOCARTA        | <a href="#">NFAT and Hypertrophy of the heart (Transcription in the broken heart)</a>                             | <a href="#">RT</a> |  | 6     | 6.9E-1  | 9.8E-1    |
| <input type="checkbox"/> | BIOCARTA        | <a href="#">Role of ?-arrestins in the activation and targeting of MAP kinases</a>                                | <a href="#">RT</a> |  | 3     | 7.1E-1  | 9.9E-1    |
| <input type="checkbox"/> | BIOCARTA        | <a href="#">Bioactive Peptide Induced Signaling Pathway</a>                                                       | <a href="#">RT</a> |  | 5     | 7.4E-1  | 9.9E-1    |
| <input type="checkbox"/> | GOTERM_BP_ALL   | <a href="#">G-protein signaling, coupled to IP3 second messenger (phospholipase C activating)</a>                 | <a href="#">RT</a> |  | 4     | 7.5E-1  | 1.0E0     |
| <input type="checkbox"/> | BIOCARTA        | <a href="#">Activation of Csk by cAMP-dependent Protein Kinase Inhibits Signaling through the T Cell Receptor</a> | <a href="#">RT</a> |  | 3     | 7.7E-1  | 9.9E-1    |
| <input type="checkbox"/> | GOTERM_BP_ALL   | <a href="#">phosphoinositide-mediated signaling</a>                                                               | <a href="#">RT</a> |  | 5     | 7.8E-1  | 1.0E0     |
| <input type="checkbox"/> | BIOCARTA        | <a href="#">BCR Signaling Pathway</a>                                                                             | <a href="#">RT</a> |  | 4     | 8.0E-1  | 9.9E-1    |
| <input type="checkbox"/> | BIOCARTA        | <a href="#">Fc Epsilon Receptor I Signaling in Mast Cells</a>                                                     | <a href="#">RT</a> |  | 4     | 8.5E-1  | 1.0E0     |
| <input type="checkbox"/> | KEGG_PATHWAY    | <a href="#">Taste transduction</a>                                                                                | <a href="#">RT</a> |  | 3     | 8.7E-1  | 1.0E0     |
| <input type="checkbox"/> | BIOCARTA        | <a href="#">Links between Pyk2 and Map Kinases</a>                                                                | <a href="#">RT</a> |  | 3     | 9.2E-1  | 1.0E0     |
| <input type="checkbox"/> | GOTERM_BP_ALL   | <a href="#">second-messenger-mediated signaling</a>                                                               | <a href="#">RT</a> |  | 10    | 9.4E-1  | 1.0E0     |
| <input type="checkbox"/> | BIOCARTA        | <a href="#">Angiotensin II mediated activation of JNK Pathway via Pyk2 dependent signaling</a>                    | <a href="#">RT</a> |  | 3     | 9.4E-1  | 1.0E0     |
| <input type="checkbox"/> | KEGG_PATHWAY    | <a href="#">Long-term depression</a>                                                                              | <a href="#">RT</a> |  | 6     | 9.5E-1  | 1.0E0     |
| <input type="checkbox"/> | KEGG_PATHWAY    | <a href="#">GnRH signaling pathway</a>                                                                            | <a href="#">RT</a> |  | 7     | 9.7E-1  | 1.0E0     |
| <input type="checkbox"/> | KEGG_PATHWAY    | <a href="#">Melanogenesis</a>                                                                                     | <a href="#">RT</a> |  | 7     | 9.8E-1  | 1.0E0     |
| <input type="checkbox"/> | KEGG_PATHWAY    | <a href="#">Long-term potentiation</a>                                                                            | <a href="#">RT</a> |  | 3     | 1.0E0   | 1.0E0     |
| <input type="checkbox"/> | KEGG_PATHWAY    | <a href="#">Calcium signaling pathway</a>                                                                         | <a href="#">RT</a> |  | 9     | 1.0E0   | 1.0E0     |
| Annotation Cluster 167   |                 | Enrichment Score: 0.4                                                                                             | <b>G</b>           |  | Count | P_Value | Benjamini |
| <input type="checkbox"/> | GOTERM_BP_ALL   | <a href="#">regulation of lipid kinase activity</a>                                                               | <a href="#">RT</a> |  | 5     | 1.0E-2  | 2.9E-1    |
| <input type="checkbox"/> | GOTERM_BP_ALL   | <a href="#">negative regulation of catalytic activity</a>                                                         | <a href="#">RT</a> |  | 9     | 2.2E-1  | 9.7E-1    |
| <input type="checkbox"/> | GOTERM_BP_ALL   | <a href="#">inactivation of MAPK activity</a>                                                                     | <a href="#">RT</a> |  | 3     | 2.8E-1  | 9.8E-1    |
| <input type="checkbox"/> | GOTERM_BP_ALL   | <a href="#">negative regulation of protein kinase activity</a>                                                    | <a href="#">RT</a> |  | 7     | 2.8E-1  | 9.8E-1    |
| <input type="checkbox"/> | GOTERM_BP_ALL   | <a href="#">negative regulation of kinase activity</a>                                                            | <a href="#">RT</a> |  | 7     | 2.8E-1  | 9.8E-1    |
| <input type="checkbox"/> | GOTERM_BP_ALL   | <a href="#">negative regulation of MAP kinase activity</a>                                                        | <a href="#">RT</a> |  | 4     | 2.9E-1  | 9.8E-1    |
| <input type="checkbox"/> | GOTERM_BP_ALL   | <a href="#">negative regulation of transferase activity</a>                                                       | <a href="#">RT</a> |  | 7     | 3.1E-1  | 9.9E-1    |
| <input type="checkbox"/> | GOTERM_BP_ALL   | <a href="#">regulation of a molecular function</a>                                                                | <a href="#">RT</a> |  | 42    | 3.7E-1  | 9.9E-1    |
| <input type="checkbox"/> | GOTERM_BP_ALL   | <a href="#">regulation of kinase activity</a>                                                                     | <a href="#">RT</a> |  | 18    | 5.0E-1  | 1.0E0     |
| <input type="checkbox"/> | GOTERM_BP_ALL   | <a href="#">regulation of MAP kinase activity</a>                                                                 | <a href="#">RT</a> |  | 8     | 5.1E-1  | 1.0E0     |
| <input type="checkbox"/> | GOTERM_BP_ALL   | <a href="#">regulation of catalytic activity</a>                                                                  | <a href="#">RT</a> |  | 35    | 5.3E-1  | 1.0E0     |
| <input type="checkbox"/> | GOTERM_BP_ALL   | <a href="#">regulation of transferase activity</a>                                                                | <a href="#">RT</a> |  | 18    | 5.6E-1  | 1.0E0     |
| <input type="checkbox"/> | GOTERM_BP_ALL   | <a href="#">regulation of protein kinase activity</a>                                                             | <a href="#">RT</a> |  | 15    | 7.4E-1  | 1.0E0     |

|                          |                 |                                                                                      |                    |  |       |         |           |
|--------------------------|-----------------|--------------------------------------------------------------------------------------|--------------------|--|-------|---------|-----------|
| <input type="checkbox"/> | GOTERM_BP_ALL   | <a href="#">activation of MAPK activity</a>                                          | <a href="#">RT</a> |  | 3     | 9.0E-1  | 1.0E0     |
| <input type="checkbox"/> | GOTERM_BP_ALL   | <a href="#">positive regulation of kinase activity</a>                               | <a href="#">RT</a> |  | 8     | 9.2E-1  | 1.0E0     |
| <input type="checkbox"/> | GOTERM_BP_ALL   | <a href="#">positive regulation of MAP kinase activity</a>                           | <a href="#">RT</a> |  | 3     | 9.4E-1  | 1.0E0     |
| <input type="checkbox"/> | GOTERM_BP_ALL   | <a href="#">positive regulation of transferase activity</a>                          | <a href="#">RT</a> |  | 8     | 9.4E-1  | 1.0E0     |
| <input type="checkbox"/> | GOTERM_BP_ALL   | <a href="#">positive regulation of protein kinase activity</a>                       | <a href="#">RT</a> |  | 6     | 9.8E-1  | 1.0E0     |
| Annotation Cluster 168   |                 | Enrichment Score: 0.4                                                                | <b>G</b>           |  | Count | P_Value | Benjamini |
| <input type="checkbox"/> | BIOCARTA        | <a href="#">Signaling Pathway from G-Protein Families</a>                            | <a href="#">RT</a> |  | 8     | 5.5E-2  | 6.8E-1    |
| <input type="checkbox"/> | GOTERM_BP_ALL   | <a href="#">regulation of neuron apoptosis</a>                                       | <a href="#">RT</a> |  | 9     | 7.7E-2  | 7.8E-1    |
| <input type="checkbox"/> | BIOCARTA        | <a href="#">Regulation of Splicing through Sam68</a>                                 | <a href="#">RT</a> |  | 4     | 1.0E-1  | 8.6E-1    |
| <input type="checkbox"/> | BIOCARTA        | <a href="#">METS affect on Macrophage Differentiation</a>                            | <a href="#">RT</a> |  | 6     | 1.1E-1  | 8.7E-1    |
| <input type="checkbox"/> | GOTERM_BP_ALL   | <a href="#">neuron apoptosis</a>                                                     | <a href="#">RT</a> |  | 9     | 1.3E-1  | 8.9E-1    |
| <input type="checkbox"/> | BIOCARTA        | <a href="#">Cadmium induces DNA synthesis and proliferation in macrophages</a>       | <a href="#">RT</a> |  | 5     | 1.5E-1  | 9.2E-1    |
| <input type="checkbox"/> | GOTERM_BP_ALL   | <a href="#">negative regulation of neuron apoptosis</a>                              | <a href="#">RT</a> |  | 6     | 1.6E-1  | 9.3E-1    |
| <input type="checkbox"/> | BIOCARTA        | <a href="#">IL 6 signaling pathway</a>                                               | <a href="#">RT</a> |  | 6     | 2.0E-1  | 9.1E-1    |
| <input type="checkbox"/> | SP_PIR_KEYWORDS | <a href="#">proto-oncogene</a>                                                       | <a href="#">RT</a> |  | 11    | 2.8E-1  | 8.8E-1    |
| <input type="checkbox"/> | BIOCARTA        | <a href="#">IGF-1 Signaling Pathway</a>                                              | <a href="#">RT</a> |  | 5     | 3.3E-1  | 9.5E-1    |
| <input type="checkbox"/> | BIOCARTA        | <a href="#">TPO Signaling Pathway</a>                                                | <a href="#">RT</a> |  | 5     | 4.3E-1  | 9.7E-1    |
| <input type="checkbox"/> | BIOCARTA        | <a href="#">Insulin Signaling Pathway</a>                                            | <a href="#">RT</a> |  | 5     | 4.3E-1  | 9.7E-1    |
| <input type="checkbox"/> | BIOCARTA        | <a href="#">Nerve growth factor pathway (NGF)</a>                                    | <a href="#">RT</a> |  | 4     | 5.1E-1  | 9.7E-1    |
| <input type="checkbox"/> | BIOCARTA        | <a href="#">Role of EGF Receptor Transactivation by GPCRs in Cardiac Hypertrophy</a> | <a href="#">RT</a> |  | 4     | 5.1E-1  | 9.7E-1    |
| <input type="checkbox"/> | KEGG_PATHWAY    | <a href="#">Renal cell carcinoma</a>                                                 | <a href="#">RT</a> |  | 10    | 5.1E-1  | 9.4E-1    |
| <input type="checkbox"/> | BIOCARTA        | <a href="#">Signaling of Hepatocyte Growth Factor Receptor</a>                       | <a href="#">RT</a> |  | 6     | 5.5E-1  | 9.7E-1    |
| <input type="checkbox"/> | BIOCARTA        | <a href="#">PDGF Signaling Pathway</a>                                               | <a href="#">RT</a> |  | 5     | 5.8E-1  | 9.7E-1    |
| <input type="checkbox"/> | BIOCARTA        | <a href="#">EGF Signaling Pathway</a>                                                | <a href="#">RT</a> |  | 5     | 5.8E-1  | 9.7E-1    |
| <input type="checkbox"/> | KEGG_PATHWAY    | <a href="#">Endometrial cancer</a>                                                   | <a href="#">RT</a> |  | 7     | 6.0E-1  | 9.6E-1    |
| <input type="checkbox"/> | BIOCARTA        | <a href="#">IL-2 Receptor Beta Chain in T cell Activation</a>                        | <a href="#">RT</a> |  | 6     | 6.0E-1  | 9.8E-1    |
| <input type="checkbox"/> | BIOCARTA        | <a href="#">EPO Signaling Pathway</a>                                                | <a href="#">RT</a> |  | 4     | 6.1E-1  | 9.7E-1    |
| <input type="checkbox"/> | BIOCARTA        | <a href="#">Inhibition of Cellular Proliferation by Gleevec</a>                      | <a href="#">RT</a> |  | 4     | 6.1E-1  | 9.7E-1    |
| <input type="checkbox"/> | BIOCARTA        | <a href="#">T Cell Receptor Signaling Pathway</a>                                    | <a href="#">RT</a> |  | 6     | 6.5E-1  | 9.8E-1    |
| <input type="checkbox"/> | BIOCARTA        | <a href="#">IL 2 signaling pathway</a>                                               | <a href="#">RT</a> |  | 4     | 6.9E-1  | 9.8E-1    |
| <input type="checkbox"/> | BIOCARTA        | <a href="#">Sprouty regulation of tyrosine kinase signals</a>                        | <a href="#">RT</a> |  | 3     | 7.1E-1  | 9.9E-1    |
| <input type="checkbox"/> | BIOCARTA        | <a href="#">IL 3 signaling pathway</a>                                               | <a href="#">RT</a> |  | 3     | 7.4E-1  | 9.9E-1    |
| <input type="checkbox"/> | BIOCARTA        | <a href="#">BCR Signaling Pathway</a>                                                | <a href="#">RT</a> |  | 4     | 8.0E-1  | 9.9E-1    |
| <input type="checkbox"/> | KEGG_PATHWAY    | <a href="#">Insulin signaling pathway</a>                                            | <a href="#">RT</a> |  | 14    | 8.1E-1  | 9.9E-1    |
| <input type="checkbox"/> | BIOCARTA        | <a href="#">Fc Epsilon Receptor I Signaling in Mast Cells</a>                        | <a href="#">RT</a> |  | 4     | 8.5E-1  | 1.0E0     |
| <input type="checkbox"/> | KEGG_PATHWAY    | <a href="#">Acute myeloid leukemia</a>                                               | <a href="#">RT</a> |  | 6     | 8.6E-1  | 1.0E0     |
| <input type="checkbox"/> | KEGG_PATHWAY    | <a href="#">ErbB signaling pathway</a>                                               | <a href="#">RT</a> |  | 7     | 9.5E-1  | 1.0E0     |
| <input type="checkbox"/> | BIOCARTA        | <a href="#">MAPKinase Signaling Pathway</a>                                          | <a href="#">RT</a> |  | 7     | 9.8E-1  | 1.0E0     |
| Annotation Cluster 169   |                 | Enrichment Score: 0.4                                                                | <b>G</b>           |  | Count | P_Value | Benjamini |
| <input type="checkbox"/> | GOTERM_BP_ALL   | <a href="#">blastocyst development</a>                                               | <a href="#">RT</a> |  | 6     | 2.3E-1  | 9.7E-1    |
| <input type="checkbox"/> | GOTERM_BP_ALL   | <a href="#">blastocyst growth</a>                                                    | <a href="#">RT</a> |  | 3     | 3.8E-1  | 1.0E0     |
| <input type="checkbox"/> | GOTERM_BP_ALL   | <a href="#">developmental growth</a>                                                 | <a href="#">RT</a> |  | 5     | 7.3E-1  | 1.0E0     |
| Annotation Cluster 170   |                 | Enrichment Score: 0.38                                                               | <b>G</b>           |  | Count | P_Value | Benjamini |
| <input type="checkbox"/> | GOTERM_CC_ALL   | <a href="#">DNA-directed RNA polymerase complex</a>                                  | <a href="#">RT</a> |  | 3     | 4.0E-1  | 9.2E-1    |
| <input type="checkbox"/> | GOTERM_CC_ALL   | <a href="#">nuclear DNA-directed RNA polymerase complex</a>                          | <a href="#">RT</a> |  | 3     | 4.0E-1  | 9.2E-1    |
| <input type="checkbox"/> | GOTERM_CC_ALL   | <a href="#">RNA polymerase complex</a>                                               | <a href="#">RT</a> |  | 3     | 4.6E-1  | 9.5E-1    |
| Annotation Cluster 171   |                 | Enrichment Score: 0.36                                                               | <b>G</b>           |  | Count | P_Value | Benjamini |

| <input type="checkbox"/> | BIOCARTA               | <a href="#">IL_6 signaling pathway</a>                                                              | RT       |  |  |  | 6     | 2.0E-1  | 9.1E-1    |  |
|--------------------------|------------------------|-----------------------------------------------------------------------------------------------------|----------|--|--|--|-------|---------|-----------|--|
| <input type="checkbox"/> | INTERPRO               | <a href="#">Basic leucine zipper</a>                                                                | RT       |  |  |  | 3     | 4.8E-1  | 1.0E0     |  |
| <input type="checkbox"/> | SMART                  | <a href="#">BRLZ</a>                                                                                | RT       |  |  |  | 5     | 5.5E-1  | 1.0E0     |  |
| <input type="checkbox"/> | INTERPRO               | <a href="#">Basic-leucine zipper (bZIP) transcription factor</a>                                    | RT       |  |  |  | 5     | 6.6E-1  | 1.0E0     |  |
|                          | Annotation Cluster 172 | Enrichment Score: 0.36                                                                              | <b>G</b> |  |  |  | Count | P_Value | Benjamini |  |
| <input type="checkbox"/> | SMART                  | <a href="#">CBS</a>                                                                                 | RT       |  |  |  | 3     | 3.9E-1  | 1.0E0     |  |
| <input type="checkbox"/> | INTERPRO               | <a href="#">Cystathionine beta-synthase, core</a>                                                   | RT       |  |  |  | 3     | 4.2E-1  | 1.0E0     |  |
| <input type="checkbox"/> | UP_SEQ_FEATURE         | domain:CBS 1                                                                                        | RT       |  |  |  | 3     | 4.4E-1  | 1.0E0     |  |
| <input type="checkbox"/> | UP_SEQ_FEATURE         | domain:CBS 2                                                                                        | RT       |  |  |  | 3     | 4.4E-1  | 1.0E0     |  |
| <input type="checkbox"/> | SP_PIR_KEYWORDS        | <a href="#">cbs domain</a>                                                                          | RT       |  |  |  | 3     | 5.0E-1  | 9.7E-1    |  |
|                          | Annotation Cluster 173 | Enrichment Score: 0.36                                                                              | <b>G</b> |  |  |  | Count | P_Value | Benjamini |  |
| <input type="checkbox"/> | GOTERM_BP_ALL          | <a href="#">estrogen receptor signaling pathway</a>                                                 | RT       |  |  |  | 3     | 1.7E-1  | 9.3E-1    |  |
| <input type="checkbox"/> | GOTERM_BP_ALL          | <a href="#">intracellular receptor-mediated signaling pathway</a>                                   | RT       |  |  |  | 4     | 6.5E-1  | 1.0E0     |  |
| <input type="checkbox"/> | GOTERM_BP_ALL          | <a href="#">steroid hormone receptor signaling pathway</a>                                          | RT       |  |  |  | 3     | 7.5E-1  | 1.0E0     |  |
|                          | Annotation Cluster 174 | Enrichment Score: 0.36                                                                              | <b>G</b> |  |  |  | Count | P_Value | Benjamini |  |
| <input type="checkbox"/> | GOTERM_BP_ALL          | <a href="#">acetyl-CoA metabolic process</a>                                                        | RT       |  |  |  | 6     | 2.5E-1  | 9.7E-1    |  |
| <input type="checkbox"/> | GOTERM_BP_ALL          | <a href="#">cellular respiration</a>                                                                | RT       |  |  |  | 5     | 3.5E-1  | 9.9E-1    |  |
| <input type="checkbox"/> | GOTERM_BP_ALL          | <a href="#">cofactor catabolic process</a>                                                          | RT       |  |  |  | 5     | 4.2E-1  | 1.0E0     |  |
| <input type="checkbox"/> | GOTERM_BP_ALL          | <a href="#">tricarboxylic acid cycle</a>                                                            | RT       |  |  |  | 4     | 4.2E-1  | 1.0E0     |  |
| <input type="checkbox"/> | GOTERM_BP_ALL          | <a href="#">acetyl-CoA catabolic process</a>                                                        | RT       |  |  |  | 4     | 4.5E-1  | 1.0E0     |  |
| <input type="checkbox"/> | GOTERM_BP_ALL          | <a href="#">aerobic respiration</a>                                                                 | RT       |  |  |  | 4     | 4.7E-1  | 1.0E0     |  |
| <input type="checkbox"/> | SP_PIR_KEYWORDS        | <a href="#">Tricarboxylic acid cycle</a>                                                            | RT       |  |  |  | 3     | 5.6E-1  | 9.8E-1    |  |
| <input type="checkbox"/> | GOTERM_BP_ALL          | <a href="#">coenzyme catabolic process</a>                                                          | RT       |  |  |  | 4     | 5.7E-1  | 1.0E0     |  |
| <input type="checkbox"/> | KEGG_PATHWAY           | <a href="#">Citrate cycle (TCA cycle)</a>                                                           | RT       |  |  |  | 4     | 5.8E-1  | 9.5E-1    |  |
|                          | Annotation Cluster 175 | Enrichment Score: 0.35                                                                              | <b>G</b> |  |  |  | Count | P_Value | Benjamini |  |
| <input type="checkbox"/> | GOTERM_BP_ALL          | <a href="#">nucleobase, nucleoside, nucleotide and nucleic acid metabolic process</a>               | RT       |  |  |  | 381   | 9.1E-7  | 1.4E-4    |  |
| <input type="checkbox"/> | GOTERM_BP_ALL          | <a href="#">gene expression</a>                                                                     | RT       |  |  |  | 296   | 2.5E-1  | 9.7E-1    |  |
| <input type="checkbox"/> | GOTERM_BP_ALL          | <a href="#">RNA metabolic process</a>                                                               | RT       |  |  |  | 250   | 2.6E-1  | 9.8E-1    |  |
| <input type="checkbox"/> | GOTERM_MF_ALL          | <a href="#">nucleic acid binding</a>                                                                | RT       |  |  |  | 280   | 5.5E-1  | 1.0E0     |  |
| <input type="checkbox"/> | SP_PIR_KEYWORDS        | <a href="#">Transcription</a>                                                                       | RT       |  |  |  | 114   | 7.6E-1  | 1.0E0     |  |
| <input type="checkbox"/> | GOTERM_MF_ALL          | <a href="#">DNA binding</a>                                                                         | RT       |  |  |  | 165   | 9.0E-1  | 1.0E0     |  |
| <input type="checkbox"/> | SP_PIR_KEYWORDS        | <a href="#">Transcription regulation</a>                                                            | RT       |  |  |  | 103   | 9.5E-1  | 1.0E0     |  |
| <input type="checkbox"/> | SP_PIR_KEYWORDS        | <a href="#">dna-binding</a>                                                                         | RT       |  |  |  | 102   | 9.7E-1  | 1.0E0     |  |
| <input type="checkbox"/> | GOTERM_BP_ALL          | <a href="#">regulation of cellular process</a>                                                      | RT       |  |  |  | 306   | 1.0E0   | 1.0E0     |  |
| <input type="checkbox"/> | GOTERM_BP_ALL          | <a href="#">biological regulation</a>                                                               | RT       |  |  |  | 373   | 1.0E0   | 1.0E0     |  |
| <input type="checkbox"/> | GOTERM_BP_ALL          | <a href="#">regulation of biological process</a>                                                    | RT       |  |  |  | 336   | 1.0E0   | 1.0E0     |  |
| <input type="checkbox"/> | GOTERM_MF_ALL          | <a href="#">transcription regulator activity</a>                                                    | RT       |  |  |  | 84    | 1.0E0   | 1.0E0     |  |
| <input type="checkbox"/> | GOTERM_BP_ALL          | <a href="#">regulation of metabolic process</a>                                                     | RT       |  |  |  | 191   | 1.0E0   | 1.0E0     |  |
| <input type="checkbox"/> | GOTERM_BP_ALL          | <a href="#">transcription</a>                                                                       | RT       |  |  |  | 166   | 1.0E0   | 1.0E0     |  |
| <input type="checkbox"/> | GOTERM_BP_ALL          | <a href="#">RNA biosynthetic process</a>                                                            | RT       |  |  |  | 152   | 1.0E0   | 1.0E0     |  |
| <input type="checkbox"/> | GOTERM_MF_ALL          | <a href="#">transcription factor activity</a>                                                       | RT       |  |  |  | 52    | 1.0E0   | 1.0E0     |  |
| <input type="checkbox"/> | GOTERM_BP_ALL          | <a href="#">regulation of nucleobase, nucleoside, nucleotide and nucleic acid metabolic process</a> | RT       |  |  |  | 161   | 1.0E0   | 1.0E0     |  |
| <input type="checkbox"/> | GOTERM_BP_ALL          | <a href="#">transcription, DNA-dependent</a>                                                        | RT       |  |  |  | 150   | 1.0E0   | 1.0E0     |  |
| <input type="checkbox"/> | GOTERM_BP_ALL          | <a href="#">regulation of cellular metabolic process</a>                                            | RT       |  |  |  | 174   | 1.0E0   | 1.0E0     |  |
| <input type="checkbox"/> | GOTERM_BP_ALL          | <a href="#">regulation of transcription</a>                                                         | RT       |  |  |  | 152   | 1.0E0   | 1.0E0     |  |
| <input type="checkbox"/> | GOTERM_BP_ALL          | <a href="#">regulation of transcription, DNA-dependent</a>                                          | RT       |  |  |  | 143   | 1.0E0   | 1.0E0     |  |
| <input type="checkbox"/> | GOTERM_BP_ALL          | <a href="#">regulation of gene expression</a>                                                       | RT       |  |  |  | 163   | 1.0E0   | 1.0E0     |  |

| Annotation Cluster 176   |                 | Enrichment Score: 0.35                                                | G  |    | Count | P_Value | Benjamini |
|--------------------------|-----------------|-----------------------------------------------------------------------|----|---------------------------------------------------------------------------------------|-------|---------|-----------|
| <input type="checkbox"/> | GOTERM_BP_ALL   | <a href="#">chaperone cofactor-dependent protein folding</a>          | RT |      | 3     | 3.8E-1  | 1.0E0     |
| <input type="checkbox"/> | GOTERM_BP_ALL   | <a href="#">'de novo' protein folding</a>                             | RT |      | 3     | 4.8E-1  | 1.0E0     |
| <input type="checkbox"/> | GOTERM_BP_ALL   | <a href="#">'de novo' posttranslational protein folding</a>           | RT |      | 3     | 4.8E-1  | 1.0E0     |
| Annotation Cluster 177   |                 | Enrichment Score: 0.34                                                | G  |    | Count | P_Value | Benjamini |
| <input type="checkbox"/> | GOTERM_BP_ALL   | <a href="#">regulation of nucleocytoplasmic transport</a>             | RT |      | 4     | 2.9E-1  | 9.8E-1    |
| <input type="checkbox"/> | GOTERM_BP_ALL   | <a href="#">regulation of intracellular protein transport</a>         | RT |      | 3     | 3.8E-1  | 1.0E0     |
| <input type="checkbox"/> | GOTERM_BP_ALL   | <a href="#">regulation of protein import into nucleus</a>             | RT |      | 3     | 3.8E-1  | 1.0E0     |
| <input type="checkbox"/> | GOTERM_BP_ALL   | <a href="#">regulation of intracellular transport</a>                 | RT |      | 3     | 4.2E-1  | 1.0E0     |
| <input type="checkbox"/> | GOTERM_BP_ALL   | <a href="#">regulation of protein transport</a>                       | RT |      | 3     | 5.1E-1  | 1.0E0     |
| <input type="checkbox"/> | GOTERM_BP_ALL   | <a href="#">regulation of transport</a>                               | RT |      | 6     | 9.8E-1  | 1.0E0     |
| Annotation Cluster 178   |                 | Enrichment Score: 0.34                                                | G  |    | Count | P_Value | Benjamini |
| <input type="checkbox"/> | SP_PIR_KEYWORDS | <a href="#">Iron transport</a>                                        | RT |      | 4     | 2.8E-1  | 8.8E-1    |
| <input type="checkbox"/> | GOTERM_BP_ALL   | <a href="#">transition metal ion transport</a>                        | RT |      | 8     | 3.0E-1  | 9.9E-1    |
| <input type="checkbox"/> | GOTERM_BP_ALL   | <a href="#">iron ion transport</a>                                    | RT |      | 4     | 5.2E-1  | 1.0E0     |
| <input type="checkbox"/> | GOTERM_BP_ALL   | <a href="#">di-, tri-valent inorganic cation transport</a>            | RT |      | 6     | 1.0E0   | 1.0E0     |
| Annotation Cluster 179   |                 | Enrichment Score: 0.34                                                | G  |    | Count | P_Value | Benjamini |
| <input type="checkbox"/> | SP_PIR_KEYWORDS | <a href="#">translation regulation</a>                                | RT |      | 5     | 2.8E-1  | 8.8E-1    |
| <input type="checkbox"/> | GOTERM_BP_ALL   | <a href="#">regulation of protein metabolic process</a>               | RT |      | 30    | 3.3E-1  | 9.9E-1    |
| <input type="checkbox"/> | GOTERM_BP_ALL   | <a href="#">regulation of biosynthetic process</a>                    | RT |      | 19    | 4.8E-1  | 1.0E0     |
| <input type="checkbox"/> | GOTERM_BP_ALL   | <a href="#">regulation of translation</a>                             | RT |      | 14    | 6.9E-1  | 1.0E0     |
| <input type="checkbox"/> | GOTERM_BP_ALL   | <a href="#">regulation of cellular biosynthetic process</a>           | RT |      | 15    | 7.0E-1  | 1.0E0     |
| Annotation Cluster 180   |                 | Enrichment Score: 0.33                                                | G  |    | Count | P_Value | Benjamini |
| <input type="checkbox"/> | GOTERM_BP_ALL   | <a href="#">positive regulation of apoptosis</a>                      | RT |      | 23    | 3.4E-1  | 9.9E-1    |
| <input type="checkbox"/> | GOTERM_BP_ALL   | <a href="#">positive regulation of programmed cell death</a>          | RT |    | 23    | 3.6E-1  | 9.9E-1    |
| <input type="checkbox"/> | GOTERM_BP_ALL   | <a href="#">regulation of programmed cell death</a>                   | RT |    | 47    | 4.1E-1  | 1.0E0     |
| <input type="checkbox"/> | GOTERM_BP_ALL   | <a href="#">regulation of apoptosis</a>                               | RT |    | 46    | 4.3E-1  | 1.0E0     |
| <input type="checkbox"/> | GOTERM_BP_ALL   | <a href="#">induction of apoptosis</a>                                | RT |    | 15    | 6.9E-1  | 1.0E0     |
| <input type="checkbox"/> | GOTERM_BP_ALL   | <a href="#">induction of programmed cell death</a>                    | RT |    | 15    | 6.9E-1  | 1.0E0     |
| Annotation Cluster 181   |                 | Enrichment Score: 0.31                                                | G  |  | Count | P_Value | Benjamini |
| <input type="checkbox"/> | GOTERM_BP_ALL   | <a href="#">chromatin assembly or disassembly</a>                     | RT |    | 14    | 1.8E-1  | 9.4E-1    |
| <input type="checkbox"/> | GOTERM_BP_ALL   | <a href="#">chromatin assembly</a>                                    | RT |    | 8     | 5.1E-1  | 1.0E0     |
| <input type="checkbox"/> | GOTERM_BP_ALL   | <a href="#">protein-DNA complex assembly</a>                          | RT |    | 8     | 7.7E-1  | 1.0E0     |
| <input type="checkbox"/> | GOTERM_BP_ALL   | <a href="#">nucleosome assembly</a>                                   | RT |    | 5     | 8.0E-1  | 1.0E0     |
| Annotation Cluster 182   |                 | Enrichment Score: 0.31                                                | G  |  | Count | P_Value | Benjamini |
| <input type="checkbox"/> | GOTERM_BP_ALL   | <a href="#">phospholipid biosynthetic process</a>                     | RT |    | 11    | 9.5E-2  | 8.3E-1    |
| <input type="checkbox"/> | GOTERM_BP_ALL   | <a href="#">phosphoinositide biosynthetic process</a>                 | RT |    | 5     | 2.0E-1  | 9.6E-1    |
| <input type="checkbox"/> | GOTERM_BP_ALL   | <a href="#">glycerophospholipid biosynthetic process</a>              | RT |    | 6     | 2.3E-1  | 9.7E-1    |
| <input type="checkbox"/> | GOTERM_BP_ALL   | <a href="#">membrane lipid biosynthetic process</a>                   | RT |    | 11    | 2.4E-1  | 9.7E-1    |
| <input type="checkbox"/> | GOTERM_BP_ALL   | <a href="#">phosphatidylinositol metabolic process</a>                | RT |    | 3     | 3.1E-1  | 9.9E-1    |
| <input type="checkbox"/> | GOTERM_BP_ALL   | <a href="#">phospholipid metabolic process</a>                        | RT |    | 14    | 5.2E-1  | 1.0E0     |
| <input type="checkbox"/> | GOTERM_BP_ALL   | <a href="#">phosphoinositide metabolic process</a>                    | RT |    | 6     | 5.5E-1  | 1.0E0     |
| <input type="checkbox"/> | GOTERM_BP_ALL   | <a href="#">GPI anchor biosynthetic process</a>                       | RT |    | 3     | 6.5E-1  | 1.0E0     |
| <input type="checkbox"/> | GOTERM_BP_ALL   | <a href="#">glycerophospholipid metabolic process</a>                 | RT |    | 7     | 6.7E-1  | 1.0E0     |
| <input type="checkbox"/> | GOTERM_BP_ALL   | <a href="#">GPI anchor metabolic process</a>                          | RT |    | 3     | 6.7E-1  | 1.0E0     |
| <input type="checkbox"/> | KEGG_PATHWAY    | <a href="#">Glycosylphosphatidylinositol(GPI)-anchor biosynthesis</a> | RT |    | 3     | 7.1E-1  | 9.8E-1    |
| <input type="checkbox"/> | GOTERM_BP_ALL   | <a href="#">membrane lipid metabolic process</a>                      | RT |    | 15    | 7.8E-1  | 1.0E0     |
| <input type="checkbox"/> | GOTERM_BP_ALL   | <a href="#">protein amino acid lipidation</a>                         | RT |    | 4     | 8.7E-1  | 1.0E0     |
| <input type="checkbox"/> | GOTERM_BP_ALL   | <a href="#">lipoprotein biosynthetic process</a>                      | RT |    | 4     | 8.9E-1  | 1.0E0     |

| <input type="checkbox"/> | KEGG_PATHWAY           | <a href="#">Glycan structures - biosynthesis 2</a>                     | <a href="#">RT</a> |  |  |  |  | 5     | 9.1E-1  | 1.0E0     |
|--------------------------|------------------------|------------------------------------------------------------------------|--------------------|--|--|--|--|-------|---------|-----------|
| <input type="checkbox"/> | GOTERM_BP_ALL          | <a href="#">lipoprotein metabolic process</a>                          | <a href="#">RT</a> |  |  |  |  | 5     | 9.2E-1  | 1.0E0     |
|                          | Annotation Cluster 183 | Enrichment Score: 0.3                                                  | <b>G</b>           |  |  |  |  | Count | P_Value | Benjamini |
| <input type="checkbox"/> | GOTERM_MF_ALL          | <a href="#">Ran GTPase binding</a>                                     | <a href="#">RT</a> |  |  |  |  | 3     | 1.3E-1  | 9.4E-1    |
| <input type="checkbox"/> | GOTERM_MF_ALL          | <a href="#">Ras GTPase binding</a>                                     | <a href="#">RT</a> |  |  |  |  | 5     | 7.6E-1  | 1.0E0     |
| <input type="checkbox"/> | GOTERM_MF_ALL          | <a href="#">small GTPase binding</a>                                   | <a href="#">RT</a> |  |  |  |  | 5     | 7.9E-1  | 1.0E0     |
| <input type="checkbox"/> | GOTERM_MF_ALL          | <a href="#">GTPase binding</a>                                         | <a href="#">RT</a> |  |  |  |  | 5     | 8.2E-1  | 1.0E0     |
|                          | Annotation Cluster 184 | Enrichment Score: 0.3                                                  | <b>G</b>           |  |  |  |  | Count | P_Value | Benjamini |
| <input type="checkbox"/> | GOTERM_MF_ALL          | <a href="#">aminopeptidase activity</a>                                | <a href="#">RT</a> |  |  |  |  | 6     | 2.8E-1  | 9.9E-1    |
| <input type="checkbox"/> | SP_PIR_KEYWORDS        | <a href="#">aminopeptidase</a>                                         | <a href="#">RT</a> |  |  |  |  | 4     | 4.1E-1  | 9.5E-1    |
| <input type="checkbox"/> | GOTERM_MF_ALL          | <a href="#">exopeptidase activity</a>                                  | <a href="#">RT</a> |  |  |  |  | 9     | 7.0E-1  | 1.0E0     |
| <input type="checkbox"/> | GOTERM_MF_ALL          | <a href="#">metalloexopeptidase activity</a>                           | <a href="#">RT</a> |  |  |  |  | 5     | 7.9E-1  | 1.0E0     |
|                          | Annotation Cluster 185 | Enrichment Score: 0.29                                                 | <b>G</b>           |  |  |  |  | Count | P_Value | Benjamini |
| <input type="checkbox"/> | GOTERM_BP_ALL          | <a href="#">protein secretion</a>                                      | <a href="#">RT</a> |  |  |  |  | 7     | 2.1E-1  | 9.6E-1    |
| <input type="checkbox"/> | GOTERM_BP_ALL          | <a href="#">regulation of protein secretion</a>                        | <a href="#">RT</a> |  |  |  |  | 3     | 6.5E-1  | 1.0E0     |
| <input type="checkbox"/> | GOTERM_BP_ALL          | <a href="#">regulation of secretion</a>                                | <a href="#">RT</a> |  |  |  |  | 4     | 9.6E-1  | 1.0E0     |
|                          | Annotation Cluster 186 | Enrichment Score: 0.29                                                 | <b>G</b>           |  |  |  |  | Count | P_Value | Benjamini |
| <input type="checkbox"/> | SMART                  | <a href="#">LDLa</a>                                                   | <a href="#">RT</a> |  |  |  |  | 5     | 3.2E-1  | 1.0E0     |
| <input type="checkbox"/> | INTERPRO               | <a href="#">Low density lipoprotein-receptor, class A</a>              | <a href="#">RT</a> |  |  |  |  | 5     | 4.6E-1  | 1.0E0     |
| <input type="checkbox"/> | SP_PIR_KEYWORDS        | <a href="#">endocytosis</a>                                            | <a href="#">RT</a> |  |  |  |  | 5     | 9.4E-1  | 1.0E0     |
|                          | Annotation Cluster 187 | Enrichment Score: 0.28                                                 | <b>G</b>           |  |  |  |  | Count | P_Value | Benjamini |
| <input type="checkbox"/> | BIOCARTA               | <a href="#">p38 MAPK Signaling Pathway</a>                             | <a href="#">RT</a> |  |  |  |  | 8     | 1.5E-1  | 9.1E-1    |
| <input type="checkbox"/> | BIOCARTA               | <a href="#">MAPKinase Signaling Pathway</a>                            | <a href="#">RT</a> |  |  |  |  | 7     | 9.8E-1  | 1.0E0     |
| <input type="checkbox"/> | KEGG_PATHWAY           | <a href="#">VEGF signaling pathway</a>                                 | <a href="#">RT</a> |  |  |  |  | 5     | 9.9E-1  | 1.0E0     |
|                          | Annotation Cluster 188 | Enrichment Score: 0.28                                                 | <b>G</b>           |  |  |  |  | Count | P_Value | Benjamini |
| <input type="checkbox"/> | GOTERM_MF_ALL          | <a href="#">sugar binding</a>                                          | <a href="#">RT</a> |  |  |  |  | 22    | 2.7E-1  | 9.9E-1    |
| <input type="checkbox"/> | SP_PIR_KEYWORDS        | <a href="#">lectin</a>                                                 | <a href="#">RT</a> |  |  |  |  | 18    | 3.0E-1  | 8.9E-1    |
| <input type="checkbox"/> | GOTERM_MF_ALL          | <a href="#">carbohydrate binding</a>                                   | <a href="#">RT</a> |  |  |  |  | 29    | 4.8E-1  | 1.0E0     |
| <input type="checkbox"/> | SMART                  | <a href="#">CLECT</a>                                                  | <a href="#">RT</a> |  |  |  |  | 9     | 6.6E-1  | 1.0E0     |
| <input type="checkbox"/> | INTERPRO               | <a href="#">Type II antifreeze protein</a>                             | <a href="#">RT</a> |  |  |  |  | 4     | 6.8E-1  | 1.0E0     |
| <input type="checkbox"/> | INTERPRO               | <a href="#">C-type lectin</a>                                          | <a href="#">RT</a> |  |  |  |  | 9     | 8.2E-1  | 1.0E0     |
| <input type="checkbox"/> | UP_SEQ_FEATURE         | domain:C-type lectin                                                   | <a href="#">RT</a> |  |  |  |  | 5     | 8.4E-1  | 1.0E0     |
|                          | Annotation Cluster 189 | Enrichment Score: 0.27                                                 | <b>G</b>           |  |  |  |  | Count | P_Value | Benjamini |
| <input type="checkbox"/> | GOTERM_BP_ALL          | <a href="#">positive regulation of cell motility</a>                   | <a href="#">RT</a> |  |  |  |  | 4     | 4.0E-1  | 1.0E0     |
| <input type="checkbox"/> | GOTERM_BP_ALL          | <a href="#">positive regulation of locomotion</a>                      | <a href="#">RT</a> |  |  |  |  | 4     | 4.0E-1  | 1.0E0     |
| <input type="checkbox"/> | GOTERM_BP_ALL          | <a href="#">negative regulation of cell motility</a>                   | <a href="#">RT</a> |  |  |  |  | 4     | 4.2E-1  | 1.0E0     |
| <input type="checkbox"/> | GOTERM_BP_ALL          | <a href="#">negative regulation of locomotion</a>                      | <a href="#">RT</a> |  |  |  |  | 4     | 4.5E-1  | 1.0E0     |
| <input type="checkbox"/> | GOTERM_BP_ALL          | <a href="#">positive regulation of cell migration</a>                  | <a href="#">RT</a> |  |  |  |  | 3     | 5.7E-1  | 1.0E0     |
| <input type="checkbox"/> | GOTERM_BP_ALL          | <a href="#">negative regulation of cell migration</a>                  | <a href="#">RT</a> |  |  |  |  | 3     | 5.7E-1  | 1.0E0     |
| <input type="checkbox"/> | GOTERM_BP_ALL          | <a href="#">regulation of cell motility</a>                            | <a href="#">RT</a> |  |  |  |  | 8     | 6.1E-1  | 1.0E0     |
| <input type="checkbox"/> | GOTERM_BP_ALL          | <a href="#">locomotion</a>                                             | <a href="#">RT</a> |  |  |  |  | 9     | 6.2E-1  | 1.0E0     |
| <input type="checkbox"/> | GOTERM_BP_ALL          | <a href="#">regulation of locomotion</a>                               | <a href="#">RT</a> |  |  |  |  | 8     | 6.6E-1  | 1.0E0     |
| <input type="checkbox"/> | GOTERM_BP_ALL          | <a href="#">regulation of cell migration</a>                           | <a href="#">RT</a> |  |  |  |  | 6     | 7.9E-1  | 1.0E0     |
|                          | Annotation Cluster 190 | Enrichment Score: 0.27                                                 | <b>G</b>           |  |  |  |  | Count | P_Value | Benjamini |
| <input type="checkbox"/> | GOTERM_MF_ALL          | <a href="#">polypeptide N-acetylgalactosaminyltransferase activity</a> | <a href="#">RT</a> |  |  |  |  | 3     | 3.7E-1  | 1.0E0     |
| <input type="checkbox"/> | UP_SEQ_FEATURE         | region of interest:Catalytic subdomain A                               | <a href="#">RT</a> |  |  |  |  | 3     | 4.4E-1  | 1.0E0     |
| <input type="checkbox"/> | UP_SEQ_FEATURE         | region of interest:Catalytic subdomain B                               | <a href="#">RT</a> |  |  |  |  | 3     | 4.4E-1  | 1.0E0     |
| <input type="checkbox"/> | UP_SEQ_FEATURE         | domain:Ricin B-type lectin                                             | <a href="#">RT</a> |  |  |  |  | 3     | 4.7E-1  | 1.0E0     |
| <input type="checkbox"/> | SMART                  | <a href="#">RICIN</a>                                                  | <a href="#">RT</a> |  |  |  |  | 3     | 5.6E-1  | 1.0E0     |
| <input type="checkbox"/> | KEGG_PATHWAY           | <a href="#">O-Glycan biosynthesis</a>                                  | <a href="#">RT</a> |  |  |  |  | 4     | 5.8E-1  | 9.5E-1    |

| <input type="checkbox"/> | INTERPRO               | <a href="#">Ricin B lectin</a>                                         | <a href="#">RT</a> |  |  |  |  | 3     | 6.6E-1  | 1.0E0     |
|--------------------------|------------------------|------------------------------------------------------------------------|--------------------|--|--|--|--|-------|---------|-----------|
| <input type="checkbox"/> | GOTERM_MF_ALL          | <a href="#">acetylglucosaminyltransferase activity</a>                 | <a href="#">RT</a> |  |  |  |  | 3     | 6.8E-1  | 1.0E0     |
| <input type="checkbox"/> | GOTERM_MF_ALL          | <a href="#">UDP-glycosyltransferase activity</a>                       | <a href="#">RT</a> |  |  |  |  | 8     | 8.0E-1  | 1.0E0     |
|                          | Annotation Cluster 191 | Enrichment Score: 0.26                                                 | <b>G</b>           |  |  |  |  | Count | P_Value | Benjamini |
| <input type="checkbox"/> | GOTERM_BP_ALL          | <a href="#">blood vessel development</a>                               | <a href="#">RT</a> |  |  |  |  | 25    | 3.9E-1  | 1.0E0     |
| <input type="checkbox"/> | GOTERM_BP_ALL          | <a href="#">vasculature development</a>                                | <a href="#">RT</a> |  |  |  |  | 25    | 4.1E-1  | 1.0E0     |
| <input type="checkbox"/> | GOTERM_BP_ALL          | <a href="#">angiogenesis</a>                                           | <a href="#">RT</a> |  |  |  |  | 17    | 4.5E-1  | 1.0E0     |
| <input type="checkbox"/> | GOTERM_BP_ALL          | <a href="#">blood vessel morphogenesis</a>                             | <a href="#">RT</a> |  |  |  |  | 21    | 4.6E-1  | 1.0E0     |
| <input type="checkbox"/> | GOTERM_BP_ALL          | <a href="#">anatomical structure formation</a>                         | <a href="#">RT</a> |  |  |  |  | 18    | 8.0E-1  | 1.0E0     |
| <input type="checkbox"/> | GOTERM_BP_ALL          | <a href="#">organ morphogenesis</a>                                    | <a href="#">RT</a> |  |  |  |  | 38    | 9.9E-1  | 1.0E0     |
|                          | Annotation Cluster 192 | Enrichment Score: 0.26                                                 | <b>G</b>           |  |  |  |  | Count | P_Value | Benjamini |
| <input type="checkbox"/> | SP_PIR_KEYWORDS        | <a href="#">calmodulin-binding</a>                                     | <a href="#">RT</a> |  |  |  |  | 11    | 4.0E-1  | 9.5E-1    |
| <input type="checkbox"/> | GOTERM_MF_ALL          | <a href="#">calmodulin binding</a>                                     | <a href="#">RT</a> |  |  |  |  | 11    | 6.3E-1  | 1.0E0     |
| <input type="checkbox"/> | UP_SEQ_FEATURE         | region of interest:Calmodulin-binding                                  | <a href="#">RT</a> |  |  |  |  | 5     | 6.5E-1  | 1.0E0     |
|                          | Annotation Cluster 193 | Enrichment Score: 0.26                                                 | <b>G</b>           |  |  |  |  | Count | P_Value | Benjamini |
| <input type="checkbox"/> | GOTERM_BP_ALL          | <a href="#">pentose-phosphate shunt</a>                                | <a href="#">RT</a> |  |  |  |  | 3     | 1.7E-1  | 9.3E-1    |
| <input type="checkbox"/> | GOTERM_BP_ALL          | <a href="#">NADP metabolic process</a>                                 | <a href="#">RT</a> |  |  |  |  | 3     | 4.2E-1  | 1.0E0     |
| <input type="checkbox"/> | GOTERM_BP_ALL          | <a href="#">nicotinamide metabolic process</a>                         | <a href="#">RT</a> |  |  |  |  | 3     | 6.5E-1  | 1.0E0     |
| <input type="checkbox"/> | GOTERM_BP_ALL          | <a href="#">pyridine nucleotide metabolic process</a>                  | <a href="#">RT</a> |  |  |  |  | 3     | 7.2E-1  | 1.0E0     |
| <input type="checkbox"/> | GOTERM_BP_ALL          | <a href="#">water-soluble vitamin metabolic process</a>                | <a href="#">RT</a> |  |  |  |  | 4     | 8.5E-1  | 1.0E0     |
| <input type="checkbox"/> | GOTERM_BP_ALL          | <a href="#">vitamin metabolic process</a>                              | <a href="#">RT</a> |  |  |  |  | 4     | 9.7E-1  | 1.0E0     |
|                          | Annotation Cluster 194 | Enrichment Score: 0.26                                                 | <b>G</b>           |  |  |  |  | Count | P_Value | Benjamini |
| <input type="checkbox"/> | GOTERM_CC_ALL          | <a href="#">mitochondrial ribosome</a>                                 | <a href="#">RT</a> |  |  |  |  | 5     | 4.7E-1  | 9.5E-1    |
| <input type="checkbox"/> | GOTERM_CC_ALL          | <a href="#">organellar ribosome</a>                                    | <a href="#">RT</a> |  |  |  |  | 5     | 4.7E-1  | 9.5E-1    |
| <input type="checkbox"/> | GOTERM_CC_ALL          | <a href="#">mitochondrial matrix</a>                                   | <a href="#">RT</a> |  |  |  |  | 6     | 6.4E-1  | 9.9E-1    |
| <input type="checkbox"/> | GOTERM_CC_ALL          | <a href="#">mitochondrial lumen</a>                                    | <a href="#">RT</a> |  |  |  |  | 6     | 6.4E-1  | 9.9E-1    |
|                          | Annotation Cluster 195 | Enrichment Score: 0.25                                                 | <b>G</b>           |  |  |  |  | Count | P_Value | Benjamini |
| <input type="checkbox"/> | GOTERM_BP_ALL          | <a href="#">organic anion transport</a>                                | <a href="#">RT</a> |  |  |  |  | 3     | 2.4E-1  | 9.7E-1    |
| <input type="checkbox"/> | GOTERM_MF_ALL          | <a href="#">neutral amino acid transmembrane transporter activity</a>  | <a href="#">RT</a> |  |  |  |  | 3     | 2.7E-1  | 9.9E-1    |
| <input type="checkbox"/> | GOTERM_MF_ALL          | <a href="#">solute:sodium symporter activity</a>                       | <a href="#">RT</a> |  |  |  |  | 6     | 3.6E-1  | 1.0E0     |
| <input type="checkbox"/> | GOTERM_MF_ALL          | <a href="#">solute:cation symporter activity</a>                       | <a href="#">RT</a> |  |  |  |  | 7     | 3.9E-1  | 1.0E0     |
| <input type="checkbox"/> | GOTERM_MF_ALL          | <a href="#">monocarboxylic acid transmembrane transporter activity</a> | <a href="#">RT</a> |  |  |  |  | 3     | 4.1E-1  | 1.0E0     |
| <input type="checkbox"/> | GOTERM_MF_ALL          | <a href="#">carboxylic acid transmembrane transporter activity</a>     | <a href="#">RT</a> |  |  |  |  | 8     | 4.3E-1  | 1.0E0     |
| <input type="checkbox"/> | GOTERM_MF_ALL          | <a href="#">organic acid transmembrane transporter activity</a>        | <a href="#">RT</a> |  |  |  |  | 8     | 4.5E-1  | 1.0E0     |
| <input type="checkbox"/> | GOTERM_MF_ALL          | <a href="#">anion:cation symporter activity</a>                        | <a href="#">RT</a> |  |  |  |  | 3     | 5.0E-1  | 1.0E0     |
| <input type="checkbox"/> | SP_PIR_KEYWORDS        | <a href="#">amino-acid transport</a>                                   | <a href="#">RT</a> |  |  |  |  | 3     | 5.0E-1  | 9.7E-1    |
| <input type="checkbox"/> | SP_PIR_KEYWORDS        | <a href="#">Symport</a>                                                | <a href="#">RT</a> |  |  |  |  | 9     | 5.3E-1  | 9.8E-1    |
| <input type="checkbox"/> | GOTERM_MF_ALL          | <a href="#">organic acid:sodium symporter activity</a>                 | <a href="#">RT</a> |  |  |  |  | 3     | 5.9E-1  | 1.0E0     |
| <input type="checkbox"/> | GOTERM_MF_ALL          | <a href="#">amino acid transmembrane transporter activity</a>          | <a href="#">RT</a> |  |  |  |  | 5     | 6.5E-1  | 1.0E0     |
| <input type="checkbox"/> | GOTERM_MF_ALL          | <a href="#">symporter activity</a>                                     | <a href="#">RT</a> |  |  |  |  | 13    | 6.7E-1  | 1.0E0     |
| <input type="checkbox"/> | GOTERM_MF_ALL          | <a href="#">secondary active transmembrane transporter activity</a>    | <a href="#">RT</a> |  |  |  |  | 15    | 8.3E-1  | 1.0E0     |
| <input type="checkbox"/> | GOTERM_BP_ALL          | <a href="#">carboxylic acid transport</a>                              | <a href="#">RT</a> |  |  |  |  | 5     | 8.8E-1  | 1.0E0     |
| <input type="checkbox"/> | GOTERM_BP_ALL          | <a href="#">organic acid transport</a>                                 | <a href="#">RT</a> |  |  |  |  | 5     | 8.9E-1  | 1.0E0     |
| <input type="checkbox"/> | GOTERM_BP_ALL          | <a href="#">amino acid transport</a>                                   | <a href="#">RT</a> |  |  |  |  | 3     | 9.6E-1  | 1.0E0     |
| <input type="checkbox"/> | GOTERM_BP_ALL          | <a href="#">amine transport</a>                                        | <a href="#">RT</a> |  |  |  |  | 3     | 9.9E-1  | 1.0E0     |
| <input type="checkbox"/> | GOTERM_BP_ALL          | <a href="#">sodium ion transport</a>                                   | <a href="#">RT</a> |  |  |  |  | 3     | 1.0E0   | 1.0E0     |
|                          | Annotation Cluster 196 | Enrichment Score: 0.25                                                 | <b>G</b>           |  |  |  |  | Count | P_Value | Benjamini |
| <input type="checkbox"/> | SP_PIR_KEYWORDS        | <a href="#">lipid transport</a>                                        | <a href="#">RT</a> |  |  |  |  | 6     | 4.2E-1  | 9.5E-1    |

|                          |                        |                                                                        |                    |  | Count | P_Value | Benjamini |
|--------------------------|------------------------|------------------------------------------------------------------------|--------------------|--|-------|---------|-----------|
| <input type="checkbox"/> | GOTERM_MF_ALL          | <a href="#">lipid transporter activity</a>                             | <a href="#">RT</a> |  | 6     | 5.6E-1  | 1.0E0     |
| <input type="checkbox"/> | GOTERM_BP_ALL          | <a href="#">lipid transport</a>                                        | <a href="#">RT</a> |  | 8     | 7.4E-1  | 1.0E0     |
|                          | Annotation Cluster 197 | Enrichment Score: 0.25                                                 | <b>G</b>           |  |       |         |           |
| <input type="checkbox"/> | PIR_SUPERFAMILY        | PIRSF001135:trypsin                                                    | <a href="#">RT</a> |  | 10    | 1.8E-1  | 1.0E0     |
| <input type="checkbox"/> | GOTERM_BP_ALL          | <a href="#">cytolysis</a>                                              | <a href="#">RT</a> |  | 5     | 2.0E-1  | 9.6E-1    |
| <input type="checkbox"/> | SP_PIR_KEYWORDS        | <a href="#">serine proteinase</a>                                      | <a href="#">RT</a> |  | 8     | 2.1E-1  | 8.2E-1    |
| <input type="checkbox"/> | UP_SEQ_FEATURE         | domain:Peptidase S1                                                    | <a href="#">RT</a> |  | 9     | 3.6E-1  | 1.0E0     |
| <input type="checkbox"/> | SP_PIR_KEYWORDS        | <a href="#">cytolysis</a>                                              | <a href="#">RT</a> |  | 3     | 4.4E-1  | 9.6E-1    |
| <input type="checkbox"/> | UP_SEQ_FEATURE         | propeptide:Activation peptide                                          | <a href="#">RT</a> |  | 7     | 5.5E-1  | 1.0E0     |
| <input type="checkbox"/> | SP_PIR_KEYWORDS        | <a href="#">Zymogen</a>                                                | <a href="#">RT</a> |  | 18    | 5.5E-1  | 9.8E-1    |
| <input type="checkbox"/> | UP_SEQ_FEATURE         | active site:Charge relay system                                        | <a href="#">RT</a> |  | 12    | 7.1E-1  | 1.0E0     |
| <input type="checkbox"/> | SMART                  | <a href="#">Tryp_SPC</a>                                               | <a href="#">RT</a> |  | 9     | 7.3E-1  | 1.0E0     |
| <input type="checkbox"/> | SP_PIR_KEYWORDS        | <a href="#">serine protease</a>                                        | <a href="#">RT</a> |  | 12    | 7.4E-1  | 1.0E0     |
| <input type="checkbox"/> | GOTERM_MF_ALL          | <a href="#">serine-type endopeptidase activity</a>                     | <a href="#">RT</a> |  | 16    | 7.9E-1  | 1.0E0     |
| <input type="checkbox"/> | SP_PIR_KEYWORDS        | <a href="#">T-cell</a>                                                 | <a href="#">RT</a> |  | 3     | 7.9E-1  | 1.0E0     |
| <input type="checkbox"/> | INTERPRO               | <a href="#">Peptidase S1 and S6, chymotrypsin/Hap</a>                  | <a href="#">RT</a> |  | 9     | 8.6E-1  | 1.0E0     |
| <input type="checkbox"/> | GOTERM_MF_ALL          | <a href="#">serine-type peptidase activity</a>                         | <a href="#">RT</a> |  | 16    | 8.7E-1  | 1.0E0     |
| <input type="checkbox"/> | GOTERM_MF_ALL          | <a href="#">serine hydrolase activity</a>                              | <a href="#">RT</a> |  | 16    | 8.7E-1  | 1.0E0     |
| <input type="checkbox"/> | INTERPRO               | <a href="#">Peptidase S1A, chymotrypsin</a>                            | <a href="#">RT</a> |  | 8     | 9.0E-1  | 1.0E0     |
| <input type="checkbox"/> | GOTERM_MF_ALL          | <a href="#">endopeptidase activity</a>                                 | <a href="#">RT</a> |  | 26    | 1.0E0   | 1.0E0     |
|                          | Annotation Cluster 198 | Enrichment Score: 0.25                                                 | <b>G</b>           |  |       |         |           |
| <input type="checkbox"/> | SP_PIR_KEYWORDS        | <a href="#">thiol protease</a>                                         | <a href="#">RT</a> |  | 14    | 1.8E-1  | 7.8E-1    |
| <input type="checkbox"/> | GOTERM_MF_ALL          | <a href="#">small conjugating protein-specific protease activity</a>   | <a href="#">RT</a> |  | 7     | 5.4E-1  | 1.0E0     |
| <input type="checkbox"/> | GOTERM_MF_ALL          | <a href="#">cysteine-type peptidase activity</a>                       | <a href="#">RT</a> |  | 15    | 6.5E-1  | 1.0E0     |
| <input type="checkbox"/> | GOTERM_MF_ALL          | <a href="#">ubiquitin thiolesterase activity</a>                       | <a href="#">RT</a> |  | 6     | 6.5E-1  | 1.0E0     |
| <input type="checkbox"/> | GOTERM_MF_ALL          | <a href="#">ubiquitin-specific protease activity</a>                   | <a href="#">RT</a> |  | 6     | 6.8E-1  | 1.0E0     |
| <input type="checkbox"/> | INTERPRO               | <a href="#">Peptidase C19, ubiquitin carboxyl-terminal hydrolase 2</a> | <a href="#">RT</a> |  | 4     | 7.7E-1  | 1.0E0     |
| <input type="checkbox"/> | GOTERM_MF_ALL          | <a href="#">thiolester hydrolase activity</a>                          | <a href="#">RT</a> |  | 7     | 7.9E-1  | 1.0E0     |
|                          | Annotation Cluster 199 | Enrichment Score: 0.25                                                 | <b>G</b>           |  |       |         |           |
| <input type="checkbox"/> | GOTERM_MF_ALL          | <a href="#">solute:sodium symporter activity</a>                       | <a href="#">RT</a> |  | 6     | 3.6E-1  | 1.0E0     |
| <input type="checkbox"/> | GOTERM_MF_ALL          | <a href="#">solute:cation symporter activity</a>                       | <a href="#">RT</a> |  | 7     | 3.9E-1  | 1.0E0     |
| <input type="checkbox"/> | GOTERM_MF_ALL          | <a href="#">neurotransmitter:sodium symporter activity</a>             | <a href="#">RT</a> |  | 3     | 6.1E-1  | 1.0E0     |
| <input type="checkbox"/> | GOTERM_MF_ALL          | <a href="#">neurotransmitter transporter activity</a>                  | <a href="#">RT</a> |  | 3     | 6.8E-1  | 1.0E0     |
| <input type="checkbox"/> | GOTERM_BP_ALL          | <a href="#">neurotransmitter transport</a>                             | <a href="#">RT</a> |  | 3     | 9.7E-1  | 1.0E0     |
|                          | Annotation Cluster 200 | Enrichment Score: 0.24                                                 | <b>G</b>           |  |       |         |           |
| <input type="checkbox"/> | SMART                  | <a href="#">RAS</a>                                                    | <a href="#">RT</a> |  | 3     | 5.4E-1  | 1.0E0     |
| <input type="checkbox"/> | PIR_SUPERFAMILY        | PIRSF037165:ras protein                                                | <a href="#">RT</a> |  | 3     | 5.5E-1  | 1.0E0     |
| <input type="checkbox"/> | INTERPRO               | <a href="#">Ras small GTPase, Ras type</a>                             | <a href="#">RT</a> |  | 3     | 6.4E-1  | 1.0E0     |
|                          | Annotation Cluster 201 | Enrichment Score: 0.23                                                 | <b>G</b>           |  |       |         |           |
| <input type="checkbox"/> | GOTERM_BP_ALL          | <a href="#">monosaccharide biosynthetic process</a>                    | <a href="#">RT</a> |  | 4     | 5.0E-1  | 1.0E0     |
| <input type="checkbox"/> | GOTERM_BP_ALL          | <a href="#">alcohol biosynthetic process</a>                           | <a href="#">RT</a> |  | 4     | 5.0E-1  | 1.0E0     |
| <input type="checkbox"/> | GOTERM_BP_ALL          | <a href="#">carbohydrate biosynthetic process</a>                      | <a href="#">RT</a> |  | 9     | 6.7E-1  | 1.0E0     |
| <input type="checkbox"/> | GOTERM_BP_ALL          | <a href="#">hexose biosynthetic process</a>                            | <a href="#">RT</a> |  | 3     | 7.2E-1  | 1.0E0     |
|                          | Annotation Cluster 202 | Enrichment Score: 0.23                                                 | <b>G</b>           |  |       |         |           |
| <input type="checkbox"/> | SP_PIR_KEYWORDS        | <a href="#">transport</a>                                              | <a href="#">RT</a> |  | 133   | 8.4E-2  | 5.4E-1    |
| <input type="checkbox"/> | GOTERM_BP_ALL          | <a href="#">proton transport</a>                                       | <a href="#">RT</a> |  | 11    | 1.4E-1  | 9.0E-1    |
| <input type="checkbox"/> | GOTERM_BP_ALL          | <a href="#">hydrogen transport</a>                                     | <a href="#">RT</a> |  | 11    | 1.9E-1  | 9.5E-1    |
| <input type="checkbox"/> | GOTERM_MF_ALL          | <a href="#">inorganic cation transmembrane transporter activity</a>    | <a href="#">RT</a> |  | 17    | 2.8E-1  | 9.9E-1    |



|                          |                 |                                                                                             |          |  |       |         |           |
|--------------------------|-----------------|---------------------------------------------------------------------------------------------|----------|--|-------|---------|-----------|
| <input type="checkbox"/> | GOTERM_MF_ALL   | <a href="#">substrate-specific transporter activity</a>                                     | RT       |  | 83    | 7.3E-1  | 1.0E0     |
| <input type="checkbox"/> | GOTERM_MF_ALL   | <a href="#">transporter activity</a>                                                        | RT       |  | 111   | 7.9E-1  | 1.0E0     |
| <input type="checkbox"/> | GOTERM_MF_ALL   | <a href="#">transmembrane transporter activity</a>                                          | RT       |  | 65    | 9.7E-1  | 1.0E0     |
| <input type="checkbox"/> | GOTERM_MF_ALL   | <a href="#">substrate-specific transmembrane transporter activity</a>                       | RT       |  | 54    | 9.8E-1  | 1.0E0     |
| <input type="checkbox"/> | GOTERM_MF_ALL   | <a href="#">ion transmembrane transporter activity</a>                                      | RT       |  | 41    | 1.0E0   | 1.0E0     |
| <input type="checkbox"/> | SP_PIR_KEYWORDS | <a href="#">ion transport</a>                                                               | RT       |  | 27    | 1.0E0   | 1.0E0     |
| <input type="checkbox"/> | GOTERM_MF_ALL   | <a href="#">cation transmembrane transporter activity</a>                                   | RT       |  | 29    | 1.0E0   | 1.0E0     |
| <input type="checkbox"/> | GOTERM_BP_ALL   | <a href="#">monovalent inorganic cation transport</a>                                       | RT       |  | 17    | 1.0E0   | 1.0E0     |
| <input type="checkbox"/> | GOTERM_BP_ALL   | <a href="#">cation transport</a>                                                            | RT       |  | 29    | 1.0E0   | 1.0E0     |
| <input type="checkbox"/> | GOTERM_BP_ALL   | <a href="#">ion transport</a>                                                               | RT       |  | 43    | 1.0E0   | 1.0E0     |
| <input type="checkbox"/> | GOTERM_BP_ALL   | <a href="#">metal ion transport</a>                                                         | RT       |  | 17    | 1.0E0   | 1.0E0     |
| Annotation Cluster 203   |                 | Enrichment Score: 0.23                                                                      | <b>G</b> |  | Count | P_Value | Benjamini |
| <input type="checkbox"/> | BIOCARTA        | <a href="#">Cadmium induces DNA synthesis and proliferation in macrophages</a>              | RT       |  | 5     | 1.5E-1  | 9.2E-1    |
| <input type="checkbox"/> | KEGG_PATHWAY    | <a href="#">B cell receptor signaling pathway</a>                                           | RT       |  | 10    | 4.1E-1  | 9.1E-1    |
| <input type="checkbox"/> | BIOCARTA        | <a href="#">Regulation of transcriptional activity by PML</a>                               | RT       |  | 4     | 5.1E-1  | 9.7E-1    |
| <input type="checkbox"/> | KEGG_PATHWAY    | <a href="#">T cell receptor signaling pathway</a>                                           | RT       |  | 9     | 9.1E-1  | 1.0E0     |
| <input type="checkbox"/> | BIOCARTA        | <a href="#">Keratinocyte Differentiation</a>                                                | RT       |  | 4     | 9.4E-1  | 1.0E0     |
| <input type="checkbox"/> | KEGG_PATHWAY    | <a href="#">Fc epsilon RI signaling pathway</a>                                             | RT       |  | 6     | 9.5E-1  | 1.0E0     |
| <input type="checkbox"/> | KEGG_PATHWAY    | <a href="#">Natural killer cell mediated cytotoxicity</a>                                   | RT       |  | 8     | 1.0E0   | 1.0E0     |
| Annotation Cluster 204   |                 | Enrichment Score: 0.22                                                                      | <b>G</b> |  | Count | P_Value | Benjamini |
| <input type="checkbox"/> | GOTERM_BP_ALL   | <a href="#">regulation of synaptic plasticity</a>                                           | RT       |  | 5     | 2.2E-1  | 9.7E-1    |
| <input type="checkbox"/> | GOTERM_BP_ALL   | <a href="#">regulation of synapse structure and activity</a>                                | RT       |  | 5     | 2.7E-1  | 9.8E-1    |
| <input type="checkbox"/> | GOTERM_BP_ALL   | <a href="#">regulation of neuronal synaptic plasticity</a>                                  | RT       |  | 3     | 4.8E-1  | 1.0E0     |
| <input type="checkbox"/> | GOTERM_BP_ALL   | <a href="#">synaptic transmission</a>                                                       | RT       |  | 7     | 1.0E0   | 1.0E0     |
| <input type="checkbox"/> | GOTERM_BP_ALL   | <a href="#">transmission of nerve impulse</a>                                               | RT       |  | 8     | 1.0E0   | 1.0E0     |
| <input type="checkbox"/> | GOTERM_BP_ALL   | <a href="#">cell-cell signaling</a>                                                         | RT       |  | 10    | 1.0E0   | 1.0E0     |
| <input type="checkbox"/> | GOTERM_BP_ALL   | <a href="#">neurological system process</a>                                                 | RT       |  | 17    | 1.0E0   | 1.0E0     |
| Annotation Cluster 205   |                 | Enrichment Score: 0.22                                                                      | <b>G</b> |  | Count | P_Value | Benjamini |
| <input type="checkbox"/> | SP_PIR_KEYWORDS | <a href="#">ribosomal protein</a>                                                           | RT       |  | 18    | 4.2E-1  | 9.5E-1    |
| <input type="checkbox"/> | GOTERM_CC_ALL   | <a href="#">ribosome</a>                                                                    | RT       |  | 17    | 5.7E-1  | 9.8E-1    |
| <input type="checkbox"/> | GOTERM_MF_ALL   | <a href="#">structural constituent of ribosome</a>                                          | RT       |  | 16    | 6.0E-1  | 1.0E0     |
| <input type="checkbox"/> | KEGG_PATHWAY    | <a href="#">Ribosome</a>                                                                    | RT       |  | 7     | 9.4E-1  | 1.0E0     |
| Annotation Cluster 206   |                 | Enrichment Score: 0.21                                                                      | <b>G</b> |  | Count | P_Value | Benjamini |
| <input type="checkbox"/> | SP_PIR_KEYWORDS | <a href="#">Elongation factor</a>                                                           | RT       |  | 4     | 3.8E-1  | 9.4E-1    |
| <input type="checkbox"/> | GOTERM_MF_ALL   | <a href="#">translation elongation factor activity</a>                                      | RT       |  | 4     | 5.7E-1  | 1.0E0     |
| <input type="checkbox"/> | GOTERM_BP_ALL   | <a href="#">translational elongation</a>                                                    | RT       |  | 3     | 6.7E-1  | 1.0E0     |
| <input type="checkbox"/> | GOTERM_BP_ALL   | <a href="#">biopolymer biosynthetic process</a>                                             | RT       |  | 3     | 9.4E-1  | 1.0E0     |
| Annotation Cluster 207   |                 | Enrichment Score: 0.2                                                                       | <b>G</b> |  | Count | P_Value | Benjamini |
| <input type="checkbox"/> | SP_PIR_KEYWORDS | <a href="#">fad</a>                                                                         | RT       |  | 10    | 5.3E-1  | 9.8E-1    |
| <input type="checkbox"/> | UP_SEQ_FEATURE  | nucleotide phosphate-binding region:FAD                                                     | RT       |  | 4     | 5.9E-1  | 1.0E0     |
| <input type="checkbox"/> | SP_PIR_KEYWORDS | <a href="#">flavoprotein</a>                                                                | RT       |  | 10    | 6.0E-1  | 9.9E-1    |
| <input type="checkbox"/> | GOTERM_MF_ALL   | <a href="#">FAD binding</a>                                                                 | RT       |  | 5     | 8.3E-1  | 1.0E0     |
| Annotation Cluster 208   |                 | Enrichment Score: 0.19                                                                      | <b>G</b> |  | Count | P_Value | Benjamini |
| <input type="checkbox"/> | SMART           | <a href="#">ETS</a>                                                                         | RT       |  | 3     | 5.8E-1  | 1.0E0     |
| <input type="checkbox"/> | INTERPRO        | <a href="#">Ets</a>                                                                         | RT       |  | 3     | 6.6E-1  | 1.0E0     |
| <input type="checkbox"/> | UP_SEQ_FEATURE  | DNA-binding region:ETS                                                                      | RT       |  | 3     | 6.8E-1  | 1.0E0     |
| Annotation Cluster 209   |                 | Enrichment Score: 0.19                                                                      | <b>G</b> |  | Count | P_Value | Benjamini |
| <input type="checkbox"/> | BIOCARTA        | <a href="#">Erk and PI-3 Kinase Are Necessary for Collagen Binding in Corneal Epithelia</a> | RT       |  | 4     | 5.4E-1  | 9.6E-1    |

| <input type="checkbox"/> | BIOCARTA               | <a href="#">mCalpain and friends in Cell motility</a>                                                                        | RT |  |       | 3       | 6.1E-1    | 9.7E-1 |
|--------------------------|------------------------|------------------------------------------------------------------------------------------------------------------------------|----|--|-------|---------|-----------|--------|
| <input type="checkbox"/> | BIOCARTA               | <a href="#">Integrin Signaling Pathway</a>                                                                                   | RT |  |       | 4       | 8.2E-1    | 9.9E-1 |
|                          | Annotation Cluster 210 | Enrichment Score: 0.18                                                                                                       | G  |  | Count | P_Value | Benjamini |        |
| <input type="checkbox"/> | GOTERM_MF_ALL          | <a href="#">endonuclease activity, active with either ribo- or deoxyribonucleic acids and producing 5'-phosphomonoesters</a> | RT |  |       | 4       | 4.1E-1    | 1.0E0  |
| <input type="checkbox"/> | GOTERM_MF_ALL          | <a href="#">endoribonuclease activity, producing 5'-phosphomonoesters</a>                                                    | RT |  |       | 3       | 6.4E-1    | 1.0E0  |
| <input type="checkbox"/> | GOTERM_MF_ALL          | <a href="#">ribonuclease activity</a>                                                                                        | RT |  |       | 5       | 8.3E-1    | 1.0E0  |
| <input type="checkbox"/> | GOTERM_MF_ALL          | <a href="#">endoribonuclease activity</a>                                                                                    | RT |  |       | 3       | 9.1E-1    | 1.0E0  |
|                          | Annotation Cluster 211 | Enrichment Score: 0.17                                                                                                       | G  |  | Count | P_Value | Benjamini |        |
| <input type="checkbox"/> | GOTERM_BP_ALL          | <a href="#">response to UV</a>                                                                                               | RT |  |       | 4       | 5.0E-1    | 1.0E0  |
| <input type="checkbox"/> | GOTERM_BP_ALL          | <a href="#">response to radiation</a>                                                                                        | RT |  |       | 9       | 7.1E-1    | 1.0E0  |
| <input type="checkbox"/> | GOTERM_BP_ALL          | <a href="#">response to light stimulus</a>                                                                                   | RT |  |       | 6       | 8.5E-1    | 1.0E0  |
|                          | Annotation Cluster 212 | Enrichment Score: 0.17                                                                                                       | G  |  | Count | P_Value | Benjamini |        |
| <input type="checkbox"/> | GOTERM_MF_ALL          | <a href="#">UDP-galactosyltransferase activity</a>                                                                           | RT |  |       | 3       | 5.0E-1    | 1.0E0  |
| <input type="checkbox"/> | GOTERM_MF_ALL          | <a href="#">galactosyltransferase activity</a>                                                                               | RT |  |       | 3       | 7.6E-1    | 1.0E0  |
| <input type="checkbox"/> | GOTERM_MF_ALL          | <a href="#">UDP-glycosyltransferase activity</a>                                                                             | RT |  |       | 8       | 8.0E-1    | 1.0E0  |
|                          | Annotation Cluster 213 | Enrichment Score: 0.17                                                                                                       | G  |  | Count | P_Value | Benjamini |        |
| <input type="checkbox"/> | INTERPRO               | <a href="#">Porin, eukaryotic type</a>                                                                                       | RT |  |       | 3       | 6.5E-2    | 9.9E-1 |
| <input type="checkbox"/> | GOTERM_CC_ALL          | <a href="#">organelle outer membrane</a>                                                                                     | RT |  |       | 5       | 3.3E-1    | 8.7E-1 |
| <input type="checkbox"/> | GOTERM_CC_ALL          | <a href="#">mitochondrial outer membrane</a>                                                                                 | RT |  |       | 4       | 4.9E-1    | 9.6E-1 |
| <input type="checkbox"/> | GOTERM_MF_ALL          | <a href="#">anion transmembrane transporter activity</a>                                                                     | RT |  |       | 8       | 9.0E-1    | 1.0E0  |
| <input type="checkbox"/> | GOTERM_MF_ALL          | <a href="#">anion channel activity</a>                                                                                       | RT |  |       | 4       | 9.2E-1    | 1.0E0  |
| <input type="checkbox"/> | GOTERM_MF_ALL          | <a href="#">voltage-gated ion channel activity</a>                                                                           | RT |  |       | 3       | 1.0E0     | 1.0E0  |
| <input type="checkbox"/> | GOTERM_MF_ALL          | <a href="#">voltage-gated channel activity</a>                                                                               | RT |  |       | 3       | 1.0E0     | 1.0E0  |
| <input type="checkbox"/> | GOTERM_MF_ALL          | <a href="#">ion channel activity</a>                                                                                         | RT |  |       | 8       | 1.0E0     | 1.0E0  |
| <input type="checkbox"/> | GOTERM_MF_ALL          | <a href="#">cation channel activity</a>                                                                                      | RT |  |       | 4       | 1.0E0     | 1.0E0  |
| <input type="checkbox"/> | GOTERM_MF_ALL          | <a href="#">substrate specific channel activity</a>                                                                          | RT |  |       | 8       | 1.0E0     | 1.0E0  |
| <input type="checkbox"/> | SP_PIR_KEYWORDS        | <a href="#">Ionic channel</a>                                                                                                | RT |  |       | 4       | 1.0E0     | 1.0E0  |
| <input type="checkbox"/> | GOTERM_MF_ALL          | <a href="#">gated channel activity</a>                                                                                       | RT |  |       | 3       | 1.0E0     | 1.0E0  |
|                          | Annotation Cluster 214 | Enrichment Score: 0.17                                                                                                       | G  |  | Count | P_Value | Benjamini |        |
| <input type="checkbox"/> | GOTERM_BP_ALL          | <a href="#">negative regulation of cell size</a>                                                                             | RT |  |       | 4       | 5.7E-1    | 1.0E0  |
| <input type="checkbox"/> | GOTERM_BP_ALL          | <a href="#">negative regulation of cell growth</a>                                                                           | RT |  |       | 3       | 7.2E-1    | 1.0E0  |
| <input type="checkbox"/> | GOTERM_BP_ALL          | <a href="#">negative regulation of growth</a>                                                                                | RT |  |       | 4       | 7.5E-1    | 1.0E0  |
|                          | Annotation Cluster 215 | Enrichment Score: 0.16                                                                                                       | G  |  | Count | P_Value | Benjamini |        |
| <input type="checkbox"/> | GOTERM_BP_ALL          | <a href="#">response to oxidative stress</a>                                                                                 | RT |  |       | 8       | 3.3E-1    | 9.9E-1 |
| <input type="checkbox"/> | GOTERM_MF_ALL          | <a href="#">antioxidant activity</a>                                                                                         | RT |  |       | 5       | 7.8E-1    | 1.0E0  |
| <input type="checkbox"/> | GOTERM_MF_ALL          | <a href="#">peroxidase activity</a>                                                                                          | RT |  |       | 3       | 9.2E-1    | 1.0E0  |
| <input type="checkbox"/> | GOTERM_MF_ALL          | <a href="#">oxidoreductase activity, acting on peroxide as acceptor</a>                                                      | RT |  |       | 3       | 9.2E-1    | 1.0E0  |
|                          | Annotation Cluster 216 | Enrichment Score: 0.16                                                                                                       | G  |  | Count | P_Value | Benjamini |        |
| <input type="checkbox"/> | GOTERM_BP_ALL          | <a href="#">negative regulation of metabolic process</a>                                                                     | RT |  |       | 43      | 2.6E-1    | 9.8E-1 |
| <input type="checkbox"/> | GOTERM_BP_ALL          | <a href="#">negative regulation of biological process</a>                                                                    | RT |  |       | 96      | 6.5E-1    | 1.0E0  |
| <input type="checkbox"/> | GOTERM_BP_ALL          | <a href="#">negative regulation of nucleobase, nucleoside, nucleotide and nucleic acid metabolic process</a>                 | RT |  |       | 28      | 6.7E-1    | 1.0E0  |
| <input type="checkbox"/> | GOTERM_BP_ALL          | <a href="#">negative regulation of cellular process</a>                                                                      | RT |  |       | 89      | 6.7E-1    | 1.0E0  |
| <input type="checkbox"/> | GOTERM_BP_ALL          | <a href="#">negative regulation of cellular metabolic process</a>                                                            | RT |  |       | 32      | 7.0E-1    | 1.0E0  |
| <input type="checkbox"/> | GOTERM_MF_ALL          | <a href="#">transcription repressor activity</a>                                                                             | RT |  |       | 14      | 8.2E-1    | 1.0E0  |
| <input type="checkbox"/> | GOTERM_BP_ALL          | <a href="#">negative regulation of transcription</a>                                                                         | RT |  |       | 22      | 9.1E-1    | 1.0E0  |
| <input type="checkbox"/> | GOTERM_BP_ALL          | <a href="#">negative regulation of transcription, DNA-dependent</a>                                                          | RT |  |       | 15      | 9.5E-1    | 1.0E0  |
| <input type="checkbox"/> | GOTERM_BP_ALL          | <a href="#">negative regulation of transcription from RNA polymerase II promoter</a>                                         | RT |  |       | 9       | 9.8E-1    | 1.0E0  |

| Annotation Cluster 217   |                 | Enrichment Score: 0.16                                                                                       |                    | G                                                                                   |    | Count | P_Value | Benjamini |
|--------------------------|-----------------|--------------------------------------------------------------------------------------------------------------|--------------------|-------------------------------------------------------------------------------------|---------------------------------------------------------------------------------------|-------|---------|-----------|
| <input type="checkbox"/> | SMART           | <a href="#">HLH</a>                                                                                          | <a href="#">RT</a> |    |                                                                                       | 9     | 5.4E-1  | 1.0E0     |
| <input type="checkbox"/> | INTERPRO        | <a href="#">Basic helix-loop-helix dimerisation region bHLH</a>                                              | <a href="#">RT</a> |    |                                                                                       | 9     | 6.9E-1  | 1.0E0     |
| <input type="checkbox"/> | INTERPRO        | <a href="#">Helix-loop-helix DNA-binding</a>                                                                 | <a href="#">RT</a> |    |                                                                                       | 7     | 7.1E-1  | 1.0E0     |
| <input type="checkbox"/> | UP_SEQ_FEATURE  | domain:Helix-loop-helix motif                                                                                | <a href="#">RT</a> |    |                                                                                       | 8     | 7.1E-1  | 1.0E0     |
| <input type="checkbox"/> | UP_SEQ_FEATURE  | DNA-binding region:Basic motif                                                                               | <a href="#">RT</a> |    |                                                                                       | 10    | 8.4E-1  | 1.0E0     |
| Annotation Cluster 218   |                 | Enrichment Score: 0.16                                                                                       |                    | G                                                                                   |    | Count | P_Value | Benjamini |
| <input type="checkbox"/> | GOTERM_BP_ALL   | <a href="#">cell migration</a>                                                                               | <a href="#">RT</a> |    |                                                                                       | 28    | 6.9E-1  | 1.0E0     |
| <input type="checkbox"/> | GOTERM_BP_ALL   | <a href="#">cell motility</a>                                                                                | <a href="#">RT</a> |    |                                                                                       | 33    | 7.1E-1  | 1.0E0     |
| <input type="checkbox"/> | GOTERM_BP_ALL   | <a href="#">localization of cell</a>                                                                         | <a href="#">RT</a> |    |                                                                                       | 33    | 7.1E-1  | 1.0E0     |
| Annotation Cluster 219   |                 | Enrichment Score: 0.15                                                                                       |                    | G                                                                                   |    | Count | P_Value | Benjamini |
| <input type="checkbox"/> | SMART           | <a href="#">Pept C1</a>                                                                                      | <a href="#">RT</a> |    |                                                                                       | 3     | 4.9E-1  | 1.0E0     |
| <input type="checkbox"/> | INTERPRO        | <a href="#">Peptidase C1A, papain C-terminal</a>                                                             | <a href="#">RT</a> |    |                                                                                       | 3     | 5.7E-1  | 1.0E0     |
| <input type="checkbox"/> | INTERPRO        | <a href="#">Peptidase C1A, papain</a>                                                                        | <a href="#">RT</a> |    |                                                                                       | 3     | 6.8E-1  | 1.0E0     |
| <input type="checkbox"/> | INTERPRO        | <a href="#">Peptidase, cysteine peptidase active site</a>                                                    | <a href="#">RT</a> |    |                                                                                       | 3     | 9.2E-1  | 1.0E0     |
| <input type="checkbox"/> | GOTERM_MF_ALL   | <a href="#">cysteine-type endopeptidase activity</a>                                                         | <a href="#">RT</a> |    |                                                                                       | 4     | 1.0E0   | 1.0E0     |
| Annotation Cluster 220   |                 | Enrichment Score: 0.15                                                                                       |                    | G                                                                                   |    | Count | P_Value | Benjamini |
| <input type="checkbox"/> | GOTERM_BP_ALL   | <a href="#">lymphocyte homeostasis</a>                                                                       | <a href="#">RT</a> |    |                                                                                       | 3     | 6.0E-1  | 1.0E0     |
| <input type="checkbox"/> | GOTERM_BP_ALL   | <a href="#">leukocyte homeostasis</a>                                                                        | <a href="#">RT</a> |    |                                                                                       | 3     | 7.5E-1  | 1.0E0     |
| <input type="checkbox"/> | GOTERM_BP_ALL   | <a href="#">homeostasis of number of cells</a>                                                               | <a href="#">RT</a> |    |                                                                                       | 3     | 7.9E-1  | 1.0E0     |
| Annotation Cluster 221   |                 | Enrichment Score: 0.14                                                                                       |                    | G                                                                                   |    | Count | P_Value | Benjamini |
| <input type="checkbox"/> | GOTERM_BP_ALL   | <a href="#">positive regulation of biological process</a>                                                    | <a href="#">RT</a> |    |                                                                                       | 100   | 4.8E-1  | 1.0E0     |
| <input type="checkbox"/> | GOTERM_BP_ALL   | <a href="#">positive regulation of cellular process</a>                                                      | <a href="#">RT</a> |    |                                                                                       | 86    | 5.8E-1  | 1.0E0     |
| <input type="checkbox"/> | GOTERM_BP_ALL   | <a href="#">positive regulation of nucleobase, nucleoside, nucleotide and nucleic acid metabolic process</a> | <a href="#">RT</a> |    |                                                                                       | 33    | 6.5E-1  | 1.0E0     |
| <input type="checkbox"/> | GOTERM_BP_ALL   | <a href="#">positive regulation of transcription</a>                                                         | <a href="#">RT</a> |    |                                                                                       | 32    | 6.7E-1  | 1.0E0     |
| <input type="checkbox"/> | GOTERM_MF_ALL   | <a href="#">transcription activator activity</a>                                                             | <a href="#">RT</a> |  |                                                                                       | 19    | 7.3E-1  | 1.0E0     |
| <input type="checkbox"/> | GOTERM_BP_ALL   | <a href="#">positive regulation of metabolic process</a>                                                     | <a href="#">RT</a> |  |                                                                                       | 41    | 7.7E-1  | 1.0E0     |
| <input type="checkbox"/> | GOTERM_BP_ALL   | <a href="#">positive regulation of transcription, DNA-dependent</a>                                          | <a href="#">RT</a> |  |                                                                                       | 23    | 8.9E-1  | 1.0E0     |
| <input type="checkbox"/> | GOTERM_BP_ALL   | <a href="#">positive regulation of cellular metabolic process</a>                                            | <a href="#">RT</a> |  |                                                                                       | 35    | 9.1E-1  | 1.0E0     |
| <input type="checkbox"/> | GOTERM_BP_ALL   | <a href="#">positive regulation of transcription from RNA polymerase II promoter</a>                         | <a href="#">RT</a> |  |                                                                                       | 12    | 1.0E0   | 1.0E0     |
| Annotation Cluster 222   |                 | Enrichment Score: 0.14                                                                                       |                    | G                                                                                   |  | Count | P_Value | Benjamini |
| <input type="checkbox"/> | GOTERM_BP_ALL   | <a href="#">embryonic epithelial tube formation</a>                                                          | <a href="#">RT</a> |  |                                                                                       | 6     | 4.2E-1  | 1.0E0     |
| <input type="checkbox"/> | GOTERM_BP_ALL   | <a href="#">neural tube formation</a>                                                                        | <a href="#">RT</a> |  |                                                                                       | 5     | 5.7E-1  | 1.0E0     |
| <input type="checkbox"/> | GOTERM_BP_ALL   | <a href="#">neural plate morphogenesis</a>                                                                   | <a href="#">RT</a> |  |                                                                                       | 5     | 5.8E-1  | 1.0E0     |
| <input type="checkbox"/> | GOTERM_BP_ALL   | <a href="#">neural plate development</a>                                                                     | <a href="#">RT</a> |  |                                                                                       | 5     | 6.0E-1  | 1.0E0     |
| <input type="checkbox"/> | GOTERM_BP_ALL   | <a href="#">morphogenesis of embryonic epithelium</a>                                                        | <a href="#">RT</a> |  |                                                                                       | 6     | 6.9E-1  | 1.0E0     |
| <input type="checkbox"/> | GOTERM_BP_ALL   | <a href="#">neural tube development</a>                                                                      | <a href="#">RT</a> |  |                                                                                       | 5     | 7.5E-1  | 1.0E0     |
| <input type="checkbox"/> | GOTERM_BP_ALL   | <a href="#">primary neural tube formation</a>                                                                | <a href="#">RT</a> |  |                                                                                       | 3     | 8.4E-1  | 1.0E0     |
| <input type="checkbox"/> | GOTERM_BP_ALL   | <a href="#">morphogenesis of an epithelium</a>                                                               | <a href="#">RT</a> |  |                                                                                       | 8     | 9.3E-1  | 1.0E0     |
| <input type="checkbox"/> | GOTERM_BP_ALL   | <a href="#">tube development</a>                                                                             | <a href="#">RT</a> |  |                                                                                       | 13    | 9.8E-1  | 1.0E0     |
| <input type="checkbox"/> | GOTERM_BP_ALL   | <a href="#">tube morphogenesis</a>                                                                           | <a href="#">RT</a> |  |                                                                                       | 9     | 9.8E-1  | 1.0E0     |
| <input type="checkbox"/> | GOTERM_BP_ALL   | <a href="#">embryonic morphogenesis</a>                                                                      | <a href="#">RT</a> |  |                                                                                       | 9     | 1.0E0   | 1.0E0     |
| Annotation Cluster 223   |                 | Enrichment Score: 0.13                                                                                       |                    | G                                                                                   |  | Count | P_Value | Benjamini |
| <input type="checkbox"/> | SP_PIR_KEYWORDS | <a href="#">Myosin</a>                                                                                       | <a href="#">RT</a> |  |                                                                                       | 4     | 6.4E-1  | 9.9E-1    |
| <input type="checkbox"/> | GOTERM_CC_ALL   | <a href="#">myosin complex</a>                                                                               | <a href="#">RT</a> |  |                                                                                       | 6     | 6.7E-1  | 9.9E-1    |
| <input type="checkbox"/> | SMART           | <a href="#">MYSc</a>                                                                                         | <a href="#">RT</a> |  |                                                                                       | 3     | 6.8E-1  | 1.0E0     |
| <input type="checkbox"/> | UP_SEQ_FEATURE  | domain:Myosin head-like                                                                                      | <a href="#">RT</a> |  |                                                                                       | 3     | 6.8E-1  | 1.0E0     |
| <input type="checkbox"/> | INTERPRO        | <a href="#">Myosin head, motor region</a>                                                                    | <a href="#">RT</a> |  |                                                                                       | 3     | 7.7E-1  | 1.0E0     |

| <input type="checkbox"/> | SMART                  | <a href="#">IQ</a>                                      | <a href="#">RT</a> |  |  |  | 5     | 8.3E-1  | 1.0E0     |  |
|--------------------------|------------------------|---------------------------------------------------------|--------------------|--|--|--|-------|---------|-----------|--|
| <input type="checkbox"/> | INTERPRO               | <a href="#">IQ_calmodulin-binding_region</a>            | <a href="#">RT</a> |  |  |  | 4     | 9.6E-1  | 1.0E0     |  |
|                          | Annotation Cluster 224 | Enrichment Score: 0.13                                  | <b>G</b>           |  |  |  | Count | P_Value | Benjamini |  |
| <input type="checkbox"/> | GOTERM_CC_ALL          | <a href="#">microbody</a>                               | <a href="#">RT</a> |  |  |  | 8     | 6.9E-1  | 9.9E-1    |  |
| <input type="checkbox"/> | GOTERM_CC_ALL          | <a href="#">peroxisome</a>                              | <a href="#">RT</a> |  |  |  | 8     | 6.9E-1  | 9.9E-1    |  |
| <input type="checkbox"/> | SP_PIR_KEYWORDS        | <a href="#">peroxisome</a>                              | <a href="#">RT</a> |  |  |  | 7     | 7.6E-1  | 1.0E0     |  |
| <input type="checkbox"/> | UP_SEQ_FEATURE         | short sequence motif:Microbody targeting signal         | <a href="#">RT</a> |  |  |  | 3     | 8.3E-1  | 1.0E0     |  |
|                          | Annotation Cluster 225 | Enrichment Score: 0.13                                  | <b>G</b>           |  |  |  | Count | P_Value | Benjamini |  |
| <input type="checkbox"/> | GOTERM_BP_ALL          | <a href="#">hair_cycle_process</a>                      | <a href="#">RT</a> |  |  |  | 4     | 6.3E-1  | 1.0E0     |  |
| <input type="checkbox"/> | GOTERM_BP_ALL          | <a href="#">molting_cycle_process</a>                   | <a href="#">RT</a> |  |  |  | 4     | 6.3E-1  | 1.0E0     |  |
| <input type="checkbox"/> | GOTERM_BP_ALL          | <a href="#">hair_follicle_development</a>               | <a href="#">RT</a> |  |  |  | 4     | 6.3E-1  | 1.0E0     |  |
| <input type="checkbox"/> | GOTERM_BP_ALL          | <a href="#">hair_cycle</a>                              | <a href="#">RT</a> |  |  |  | 4     | 6.5E-1  | 1.0E0     |  |
| <input type="checkbox"/> | GOTERM_BP_ALL          | <a href="#">molting_cycle</a>                           | <a href="#">RT</a> |  |  |  | 4     | 6.5E-1  | 1.0E0     |  |
| <input type="checkbox"/> | GOTERM_BP_ALL          | <a href="#">epidermis_development</a>                   | <a href="#">RT</a> |  |  |  | 8     | 8.1E-1  | 1.0E0     |  |
| <input type="checkbox"/> | GOTERM_BP_ALL          | <a href="#">ectoderm_development</a>                    | <a href="#">RT</a> |  |  |  | 8     | 8.6E-1  | 1.0E0     |  |
| <input type="checkbox"/> | GOTERM_BP_ALL          | <a href="#">epidermis_morphogenesis</a>                 | <a href="#">RT</a> |  |  |  | 3     | 9.5E-1  | 1.0E0     |  |
| <input type="checkbox"/> | GOTERM_BP_ALL          | <a href="#">tissue_morphogenesis</a>                    | <a href="#">RT</a> |  |  |  | 3     | 1.0E0   | 1.0E0     |  |
|                          | Annotation Cluster 226 | Enrichment Score: 0.13                                  | <b>G</b>           |  |  |  | Count | P_Value | Benjamini |  |
| <input type="checkbox"/> | GOTERM_BP_ALL          | <a href="#">membrane_organization_and_biogenesis</a>    | <a href="#">RT</a> |  |  |  | 28    | 3.4E-1  | 9.9E-1    |  |
| <input type="checkbox"/> | SP_PIR_KEYWORDS        | <a href="#">endocytosis</a>                             | <a href="#">RT</a> |  |  |  | 5     | 9.4E-1  | 1.0E0     |  |
| <input type="checkbox"/> | GOTERM_BP_ALL          | <a href="#">endocytosis</a>                             | <a href="#">RT</a> |  |  |  | 11    | 9.8E-1  | 1.0E0     |  |
| <input type="checkbox"/> | GOTERM_BP_ALL          | <a href="#">membrane_invagination</a>                   | <a href="#">RT</a> |  |  |  | 11    | 9.8E-1  | 1.0E0     |  |
|                          | Annotation Cluster 227 | Enrichment Score: 0.13                                  | <b>G</b>           |  |  |  | Count | P_Value | Benjamini |  |
| <input type="checkbox"/> | GOTERM_BP_ALL          | <a href="#">lymphocyte_proliferation</a>                | <a href="#">RT</a> |  |  |  | 9     | 5.9E-1  | 1.0E0     |  |
| <input type="checkbox"/> | GOTERM_BP_ALL          | <a href="#">mononuclear_cell_proliferation</a>          | <a href="#">RT</a> |  |  |  | 9     | 5.9E-1  | 1.0E0     |  |
| <input type="checkbox"/> | GOTERM_BP_ALL          | <a href="#">B_cell_activation</a>                       | <a href="#">RT</a> |  |  |  | 9     | 6.9E-1  | 1.0E0     |  |
| <input type="checkbox"/> | GOTERM_BP_ALL          | <a href="#">leukocyte_activation</a>                    | <a href="#">RT</a> |  |  |  | 21    | 7.3E-1  | 1.0E0     |  |
| <input type="checkbox"/> | GOTERM_BP_ALL          | <a href="#">lymphocyte_activation</a>                   | <a href="#">RT</a> |  |  |  | 19    | 7.6E-1  | 1.0E0     |  |
| <input type="checkbox"/> | GOTERM_BP_ALL          | <a href="#">cell_activation</a>                         | <a href="#">RT</a> |  |  |  | 22    | 7.6E-1  | 1.0E0     |  |
| <input type="checkbox"/> | GOTERM_BP_ALL          | <a href="#">B_cell_proliferation</a>                    | <a href="#">RT</a> |  |  |  | 3     | 7.9E-1  | 1.0E0     |  |
| <input type="checkbox"/> | GOTERM_BP_ALL          | <a href="#">T_cell_activation</a>                       | <a href="#">RT</a> |  |  |  | 10    | 9.2E-1  | 1.0E0     |  |
| <input type="checkbox"/> | GOTERM_BP_ALL          | <a href="#">T_cell_proliferation</a>                    | <a href="#">RT</a> |  |  |  | 4     | 9.5E-1  | 1.0E0     |  |
|                          | Annotation Cluster 228 | Enrichment Score: 0.13                                  | <b>G</b>           |  |  |  | Count | P_Value | Benjamini |  |
| <input type="checkbox"/> | GOTERM_MF_ALL          | <a href="#">enzyme_activator_activity</a>               | <a href="#">RT</a> |  |  |  | 23    | 4.8E-1  | 1.0E0     |  |
| <input type="checkbox"/> | GOTERM_MF_ALL          | <a href="#">GTPase_activator_activity</a>               | <a href="#">RT</a> |  |  |  | 13    | 8.9E-1  | 1.0E0     |  |
| <input type="checkbox"/> | GOTERM_MF_ALL          | <a href="#">GTPase_regulator_activity</a>               | <a href="#">RT</a> |  |  |  | 22    | 9.8E-1  | 1.0E0     |  |
|                          | Annotation Cluster 229 | Enrichment Score: 0.12                                  | <b>G</b>           |  |  |  | Count | P_Value | Benjamini |  |
| <input type="checkbox"/> | GOTERM_CC_ALL          | <a href="#">microsome</a>                               | <a href="#">RT</a> |  |  |  | 15    | 5.9E-1  | 9.8E-1    |  |
| <input type="checkbox"/> | GOTERM_CC_ALL          | <a href="#">vesicular_fraction</a>                      | <a href="#">RT</a> |  |  |  | 15    | 6.4E-1  | 9.9E-1    |  |
| <input type="checkbox"/> | SP_PIR_KEYWORDS        | <a href="#">microsome</a>                               | <a href="#">RT</a> |  |  |  | 8     | 8.0E-1  | 1.0E0     |  |
| <input type="checkbox"/> | GOTERM_CC_ALL          | <a href="#">cell_fraction</a>                           | <a href="#">RT</a> |  |  |  | 44    | 8.5E-1  | 1.0E0     |  |
| <input type="checkbox"/> | GOTERM_CC_ALL          | <a href="#">membrane_fraction</a>                       | <a href="#">RT</a> |  |  |  | 36    | 9.3E-1  | 1.0E0     |  |
|                          | Annotation Cluster 230 | Enrichment Score: 0.12                                  | <b>G</b>           |  |  |  | Count | P_Value | Benjamini |  |
| <input type="checkbox"/> | SMART                  | <a href="#">PSI</a>                                     | <a href="#">RT</a> |  |  |  | 4     | 6.8E-1  | 1.0E0     |  |
| <input type="checkbox"/> | SMART                  | <a href="#">Sema</a>                                    | <a href="#">RT</a> |  |  |  | 3     | 7.1E-1  | 1.0E0     |  |
| <input type="checkbox"/> | INTERPRO               | <a href="#">Plexin</a>                                  | <a href="#">RT</a> |  |  |  | 3     | 7.9E-1  | 1.0E0     |  |
| <input type="checkbox"/> | INTERPRO               | <a href="#">Plexin/semaphorin/integrin</a>              | <a href="#">RT</a> |  |  |  | 4     | 8.0E-1  | 1.0E0     |  |
| <input type="checkbox"/> | INTERPRO               | <a href="#">Semaphorin/CD100_antigen</a>                | <a href="#">RT</a> |  |  |  | 3     | 8.0E-1  | 1.0E0     |  |
|                          | Annotation Cluster 231 | Enrichment Score: 0.12                                  | <b>G</b>           |  |  |  | Count | P_Value | Benjamini |  |
| <input type="checkbox"/> | GOTERM_BP_ALL          | <a href="#">inner_ear_receptor_cell_differentiation</a> | <a href="#">RT</a> |  |  |  | 4     | 4.5E-1  | 1.0E0     |  |

|                          |                 |                                                                                        |    |  | Count | P_Value | Benjamini |
|--------------------------|-----------------|----------------------------------------------------------------------------------------|----|--|-------|---------|-----------|
| <input type="checkbox"/> | GOTERM_BP_ALL   | <a href="#">mechanoreceptor differentiation</a>                                        | RT |  | 4     | 6.1E-1  | 1.0E0     |
| <input type="checkbox"/> | GOTERM_BP_ALL   | <a href="#">ear development</a>                                                        | RT |  | 5     | 9.3E-1  | 1.0E0     |
| <input type="checkbox"/> | GOTERM_BP_ALL   | <a href="#">inner ear development</a>                                                  | RT |  | 4     | 9.6E-1  | 1.0E0     |
| <input type="checkbox"/> | GOTERM_BP_ALL   | <a href="#">sensory organ development</a>                                              | RT |  | 6     | 1.0E0   | 1.0E0     |
| Annotation Cluster 232   |                 | Enrichment Score: 0.12                                                                 | G  |  |       |         |           |
| <input type="checkbox"/> | GOTERM_MF_ALL   | <a href="#">acetyltransferase activity</a>                                             | RT |  | 8     | 4.3E-1  | 1.0E0     |
| <input type="checkbox"/> | GOTERM_MF_ALL   | <a href="#">transferase activity, transferring acyl groups</a>                         | RT |  | 16    | 7.2E-1  | 1.0E0     |
| <input type="checkbox"/> | GOTERM_MF_ALL   | <a href="#">N-acetyltransferase activity</a>                                           | RT |  | 5     | 7.6E-1  | 1.0E0     |
| <input type="checkbox"/> | GOTERM_MF_ALL   | <a href="#">N-acyltransferase activity</a>                                             | RT |  | 5     | 8.5E-1  | 1.0E0     |
| <input type="checkbox"/> | GOTERM_MF_ALL   | <a href="#">acyltransferase activity</a>                                               | RT |  | 13    | 8.8E-1  | 1.0E0     |
| <input type="checkbox"/> | GOTERM_MF_ALL   | <a href="#">transferase activity, transferring groups other than amino-acyl groups</a> | RT |  | 13    | 8.9E-1  | 1.0E0     |
| <input type="checkbox"/> | SP_PIR_KEYWORDS | <a href="#">acyltransferase</a>                                                        | RT |  | 8     | 9.7E-1  | 1.0E0     |
| Annotation Cluster 233   |                 | Enrichment Score: 0.11                                                                 | G  |  |       |         |           |
| <input type="checkbox"/> | SP_PIR_KEYWORDS | <a href="#">chemotaxis</a>                                                             | RT |  | 7     | 4.5E-1  | 9.6E-1    |
| <input type="checkbox"/> | INTERPRO        | <a href="#">Small chemokine, C-C</a>                                                   | RT |  | 3     | 6.2E-1  | 1.0E0     |
| <input type="checkbox"/> | GOTERM_BP_ALL   | <a href="#">chemotaxis</a>                                                             | RT |  | 11    | 6.3E-1  | 1.0E0     |
| <input type="checkbox"/> | GOTERM_BP_ALL   | <a href="#">taxis</a>                                                                  | RT |  | 11    | 6.3E-1  | 1.0E0     |
| <input type="checkbox"/> | PIRSUPERFAMILY  | PIRSF001950:small inducible chemokine, C/CC types                                      | RT |  | 3     | 6.7E-1  | 1.0E0     |
| <input type="checkbox"/> | GOTERM_MF_ALL   | <a href="#">chemokine activity</a>                                                     | RT |  | 4     | 7.5E-1  | 1.0E0     |
| <input type="checkbox"/> | GOTERM_MF_ALL   | <a href="#">chemokine receptor binding</a>                                             | RT |  | 4     | 7.7E-1  | 1.0E0     |
| <input type="checkbox"/> | SMART           | <a href="#">SCY</a>                                                                    | RT |  | 3     | 8.0E-1  | 1.0E0     |
| <input type="checkbox"/> | GOTERM_MF_ALL   | <a href="#">G-protein-coupled receptor binding</a>                                     | RT |  | 5     | 8.7E-1  | 1.0E0     |
| <input type="checkbox"/> | SP_PIR_KEYWORDS | <a href="#">pyrrolidone carboxylic acid</a>                                            | RT |  | 3     | 8.7E-1  | 1.0E0     |
| <input type="checkbox"/> | INTERPRO        | <a href="#">Small chemokine, interleukin-8-like</a>                                    | RT |  | 3     | 8.8E-1  | 1.0E0     |
| <input type="checkbox"/> | SP_PIR_KEYWORDS | <a href="#">inflammatory response</a>                                                  | RT |  | 5     | 8.8E-1  | 1.0E0     |
| <input type="checkbox"/> | SP_PIR_KEYWORDS | <a href="#">cytokine</a>                                                               | RT |  | 10    | 9.8E-1  | 1.0E0     |
| <input type="checkbox"/> | GOTERM_BP_ALL   | <a href="#">locomotory behavior</a>                                                    | RT |  | 13    | 9.8E-1  | 1.0E0     |
| <input type="checkbox"/> | GOTERM_BP_ALL   | <a href="#">behavior</a>                                                               | RT |  | 18    | 1.0E0   | 1.0E0     |
| Annotation Cluster 234   |                 | Enrichment Score: 0.11                                                                 | G  |  |       |         |           |
| <input type="checkbox"/> | GOTERM_BP_ALL   | <a href="#">iron ion homeostasis</a>                                                   | RT |  | 4     | 4.0E-1  | 1.0E0     |
| <input type="checkbox"/> | GOTERM_BP_ALL   | <a href="#">cellular iron ion homeostasis</a>                                          | RT |  | 4     | 4.0E-1  | 1.0E0     |
| <input type="checkbox"/> | GOTERM_BP_ALL   | <a href="#">cellular homeostasis</a>                                                   | RT |  | 25    | 5.3E-1  | 1.0E0     |
| <input type="checkbox"/> | GOTERM_BP_ALL   | <a href="#">elevation of cytosolic calcium ion concentration</a>                       | RT |  | 3     | 6.3E-1  | 1.0E0     |
| <input type="checkbox"/> | GOTERM_BP_ALL   | <a href="#">regulation of biological quality</a>                                       | RT |  | 66    | 6.4E-1  | 1.0E0     |
| <input type="checkbox"/> | GOTERM_BP_ALL   | <a href="#">cytosolic calcium ion homeostasis</a>                                      | RT |  | 3     | 6.7E-1  | 1.0E0     |
| <input type="checkbox"/> | GOTERM_BP_ALL   | <a href="#">cellular di-, tri-valent inorganic cation homeostasis</a>                  | RT |  | 9     | 7.9E-1  | 1.0E0     |
| <input type="checkbox"/> | GOTERM_BP_ALL   | <a href="#">di-, tri-valent inorganic cation homeostasis</a>                           | RT |  | 9     | 8.2E-1  | 1.0E0     |
| <input type="checkbox"/> | GOTERM_BP_ALL   | <a href="#">cellular cation homeostasis</a>                                            | RT |  | 9     | 8.9E-1  | 1.0E0     |
| <input type="checkbox"/> | GOTERM_BP_ALL   | <a href="#">cellular calcium ion homeostasis</a>                                       | RT |  | 5     | 9.0E-1  | 1.0E0     |
| <input type="checkbox"/> | GOTERM_BP_ALL   | <a href="#">cation homeostasis</a>                                                     | RT |  | 9     | 9.0E-1  | 1.0E0     |
| <input type="checkbox"/> | GOTERM_BP_ALL   | <a href="#">calcium ion homeostasis</a>                                                | RT |  | 5     | 9.1E-1  | 1.0E0     |
| <input type="checkbox"/> | GOTERM_BP_ALL   | <a href="#">homeostatic process</a>                                                    | RT |  | 28    | 9.3E-1  | 1.0E0     |
| <input type="checkbox"/> | GOTERM_BP_ALL   | <a href="#">cellular metal ion homeostasis</a>                                         | RT |  | 5     | 9.4E-1  | 1.0E0     |
| <input type="checkbox"/> | GOTERM_BP_ALL   | <a href="#">metal ion homeostasis</a>                                                  | RT |  | 5     | 9.5E-1  | 1.0E0     |
| <input type="checkbox"/> | GOTERM_BP_ALL   | <a href="#">cellular chemical homeostasis</a>                                          | RT |  | 12    | 9.5E-1  | 1.0E0     |
| <input type="checkbox"/> | GOTERM_BP_ALL   | <a href="#">cellular ion homeostasis</a>                                               | RT |  | 12    | 9.5E-1  | 1.0E0     |
| <input type="checkbox"/> | GOTERM_BP_ALL   | <a href="#">ion homeostasis</a>                                                        | RT |  | 12    | 9.8E-1  | 1.0E0     |

| <input type="checkbox"/> | GOTERM_BP_ALL          | <a href="#">chemical homeostasis</a>                                                                         | <a href="#">RT</a> |  |  |  |  | 13    | 1.0E0   | 1.0E0     |  |
|--------------------------|------------------------|--------------------------------------------------------------------------------------------------------------|--------------------|--|--|--|--|-------|---------|-----------|--|
|                          | Annotation Cluster 235 | Enrichment Score: 0.11                                                                                       | <b>G</b>           |  |  |  |  | Count | P_Value | Benjamini |  |
| <input type="checkbox"/> | SMART                  | <a href="#">RING</a>                                                                                         | <a href="#">RT</a> |  |  |  |  | 18    | 6.8E-1  | 1.0E0     |  |
| <input type="checkbox"/> | UP_SEQ_FEATURE         | zinc finger region:RING-type                                                                                 | <a href="#">RT</a> |  |  |  |  | 11    | 7.4E-1  | 1.0E0     |  |
| <input type="checkbox"/> | INTERPRO               | <a href="#">Zinc finger, RING/FYVE/PHD-type</a>                                                              | <a href="#">RT</a> |  |  |  |  | 12    | 8.1E-1  | 1.0E0     |  |
| <input type="checkbox"/> | INTERPRO               | <a href="#">Zinc finger, RING-type</a>                                                                       | <a href="#">RT</a> |  |  |  |  | 17    | 8.9E-1  | 1.0E0     |  |
|                          | Annotation Cluster 236 | Enrichment Score: 0.1                                                                                        | <b>G</b>           |  |  |  |  | Count | P_Value | Benjamini |  |
| <input type="checkbox"/> | GOTERM_BP_ALL          | <a href="#">regulation of JNK cascade</a>                                                                    | <a href="#">RT</a> |  |  |  |  | 3     | 6.3E-1  | 1.0E0     |  |
| <input type="checkbox"/> | GOTERM_BP_ALL          | <a href="#">MAPKKK cascade</a>                                                                               | <a href="#">RT</a> |  |  |  |  | 11    | 8.3E-1  | 1.0E0     |  |
| <input type="checkbox"/> | GOTERM_BP_ALL          | <a href="#">JNK cascade</a>                                                                                  | <a href="#">RT</a> |  |  |  |  | 4     | 8.6E-1  | 1.0E0     |  |
| <input type="checkbox"/> | GOTERM_BP_ALL          | <a href="#">stress-activated protein kinase signaling pathway</a>                                            | <a href="#">RT</a> |  |  |  |  | 4     | 8.8E-1  | 1.0E0     |  |
|                          | Annotation Cluster 237 | Enrichment Score: 0.1                                                                                        | <b>G</b>           |  |  |  |  | Count | P_Value | Benjamini |  |
| <input type="checkbox"/> | GOTERM_BP_ALL          | <a href="#">immunoglobulin production</a>                                                                    | <a href="#">RT</a> |  |  |  |  | 4     | 7.5E-1  | 1.0E0     |  |
| <input type="checkbox"/> | GOTERM_BP_ALL          | <a href="#">production of molecular mediator of immune response</a>                                          | <a href="#">RT</a> |  |  |  |  | 4     | 7.7E-1  | 1.0E0     |  |
| <input type="checkbox"/> | GOTERM_BP_ALL          | <a href="#">somatic recombination of immunoglobulin gene segments</a>                                        | <a href="#">RT</a> |  |  |  |  | 3     | 7.7E-1  | 1.0E0     |  |
| <input type="checkbox"/> | GOTERM_BP_ALL          | <a href="#">somatic cell DNA recombination</a>                                                               | <a href="#">RT</a> |  |  |  |  | 3     | 8.0E-1  | 1.0E0     |  |
| <input type="checkbox"/> | GOTERM_BP_ALL          | <a href="#">somatic diversification of immune receptors via germline recombination within a single locus</a> | <a href="#">RT</a> |  |  |  |  | 3     | 8.0E-1  | 1.0E0     |  |
| <input type="checkbox"/> | GOTERM_BP_ALL          | <a href="#">somatic diversification of immunoglobulins</a>                                                   | <a href="#">RT</a> |  |  |  |  | 3     | 8.2E-1  | 1.0E0     |  |
| <input type="checkbox"/> | GOTERM_BP_ALL          | <a href="#">somatic diversification of immune receptors</a>                                                  | <a href="#">RT</a> |  |  |  |  | 3     | 8.4E-1  | 1.0E0     |  |
|                          | Annotation Cluster 238 | Enrichment Score: 0.1                                                                                        | <b>G</b>           |  |  |  |  | Count | P_Value | Benjamini |  |
| <input type="checkbox"/> | SMART                  | <a href="#">SOCS</a>                                                                                         | <a href="#">RT</a> |  |  |  |  | 3     | 7.4E-1  | 1.0E0     |  |
| <input type="checkbox"/> | INTERPRO               | <a href="#">SOCS protein, C-terminal</a>                                                                     | <a href="#">RT</a> |  |  |  |  | 3     | 8.3E-1  | 1.0E0     |  |
| <input type="checkbox"/> | UP_SEQ_FEATURE         | domain:SOCS box                                                                                              | <a href="#">RT</a> |  |  |  |  | 3     | 8.3E-1  | 1.0E0     |  |
|                          | Annotation Cluster 239 | Enrichment Score: 0.09                                                                                       | <b>G</b>           |  |  |  |  | Count | P_Value | Benjamini |  |
| <input type="checkbox"/> | GOTERM_MF_ALL          | <a href="#">exopeptidase activity</a>                                                                        | <a href="#">RT</a> |  |  |  |  | 9     | 7.0E-1  | 1.0E0     |  |
| <input type="checkbox"/> | SP_PIR_KEYWORDS        | <a href="#">carboxypeptidase</a>                                                                             | <a href="#">RT</a> |  |  |  |  | 3     | 8.1E-1  | 1.0E0     |  |
| <input type="checkbox"/> | GOTERM_MF_ALL          | <a href="#">carboxypeptidase activity</a>                                                                    | <a href="#">RT</a> |  |  |  |  | 3     | 9.3E-1  | 1.0E0     |  |
|                          | Annotation Cluster 240 | Enrichment Score: 0.09                                                                                       | <b>G</b>           |  |  |  |  | Count | P_Value | Benjamini |  |
| <input type="checkbox"/> | GOTERM_BP_ALL          | <a href="#">glucose transport</a>                                                                            | <a href="#">RT</a> |  |  |  |  | 3     | 8.0E-1  | 1.0E0     |  |
| <input type="checkbox"/> | GOTERM_BP_ALL          | <a href="#">carbohydrate transport</a>                                                                       | <a href="#">RT</a> |  |  |  |  | 6     | 8.1E-1  | 1.0E0     |  |
| <input type="checkbox"/> | GOTERM_BP_ALL          | <a href="#">hexose transport</a>                                                                             | <a href="#">RT</a> |  |  |  |  | 3     | 8.2E-1  | 1.0E0     |  |
| <input type="checkbox"/> | GOTERM_BP_ALL          | <a href="#">monosaccharide transport</a>                                                                     | <a href="#">RT</a> |  |  |  |  | 3     | 8.2E-1  | 1.0E0     |  |
|                          | Annotation Cluster 241 | Enrichment Score: 0.08                                                                                       | <b>G</b>           |  |  |  |  | Count | P_Value | Benjamini |  |
| <input type="checkbox"/> | SMART                  | <a href="#">SANT</a>                                                                                         | <a href="#">RT</a> |  |  |  |  | 4     | 7.9E-1  | 1.0E0     |  |
| <input type="checkbox"/> | INTERPRO               | <a href="#">Myb, DNA-binding</a>                                                                             | <a href="#">RT</a> |  |  |  |  | 3     | 8.0E-1  | 1.0E0     |  |
| <input type="checkbox"/> | INTERPRO               | <a href="#">SANT, DNA-binding</a>                                                                            | <a href="#">RT</a> |  |  |  |  | 4     | 8.8E-1  | 1.0E0     |  |
|                          | Annotation Cluster 242 | Enrichment Score: 0.08                                                                                       | <b>G</b>           |  |  |  |  | Count | P_Value | Benjamini |  |
| <input type="checkbox"/> | SP_PIR_KEYWORDS        | <a href="#">EF hand</a>                                                                                      | <a href="#">RT</a> |  |  |  |  | 5     | 3.2E-1  | 9.1E-1    |  |
| <input type="checkbox"/> | SMART                  | <a href="#">EFh</a>                                                                                          | <a href="#">RT</a> |  |  |  |  | 12    | 8.5E-1  | 1.0E0     |  |
| <input type="checkbox"/> | UP_SEQ_FEATURE         | domain:EF-hand 1                                                                                             | <a href="#">RT</a> |  |  |  |  | 8     | 9.3E-1  | 1.0E0     |  |
| <input type="checkbox"/> | UP_SEQ_FEATURE         | domain:EF-hand 2                                                                                             | <a href="#">RT</a> |  |  |  |  | 8     | 9.3E-1  | 1.0E0     |  |
| <input type="checkbox"/> | UP_SEQ_FEATURE         | calcium-binding region:2                                                                                     | <a href="#">RT</a> |  |  |  |  | 5     | 9.7E-1  | 1.0E0     |  |
| <input type="checkbox"/> | INTERPRO               | <a href="#">Calcium-binding EF-hand</a>                                                                      | <a href="#">RT</a> |  |  |  |  | 11    | 9.7E-1  | 1.0E0     |  |
| <input type="checkbox"/> | UP_SEQ_FEATURE         | calcium-binding region:1                                                                                     | <a href="#">RT</a> |  |  |  |  | 5     | 9.7E-1  | 1.0E0     |  |
| <input type="checkbox"/> | INTERPRO               | <a href="#">EF-Hand type</a>                                                                                 | <a href="#">RT</a> |  |  |  |  | 8     | 1.0E0   | 1.0E0     |  |
|                          | Annotation Cluster 243 | Enrichment Score: 0.08                                                                                       | <b>G</b>           |  |  |  |  | Count | P_Value | Benjamini |  |
| <input type="checkbox"/> | SP_PIR_KEYWORDS        | <a href="#">cholesterol metabolism</a>                                                                       | <a href="#">RT</a> |  |  |  |  | 3     | 6.8E-1  | 1.0E0     |  |
| <input type="checkbox"/> | SP_PIR_KEYWORDS        | <a href="#">steroid metabolism</a>                                                                           | <a href="#">RT</a> |  |  |  |  | 3     | 8.3E-1  | 1.0E0     |  |

| <input type="checkbox"/> | SP_PIR_KEYWORDS        | <a href="#">lipid metabolism</a>                                                                      | RT       |  |  |  |  | 5     | 9.9E-1  | 1.0E0     |
|--------------------------|------------------------|-------------------------------------------------------------------------------------------------------|----------|--|--|--|--|-------|---------|-----------|
|                          | Annotation Cluster 244 | Enrichment Score: 0.08                                                                                | <b>G</b> |  |  |  |  | Count | P_Value | Benjamini |
| <input type="checkbox"/> | GOTERM_MF_ALL          | <a href="#">ATPase activity, coupled to transmembrane movement of ions, phosphorylative mechanism</a> | RT       |  |  |  |  | 6     | 7.4E-1  | 1.0E0     |
| <input type="checkbox"/> | INTERPRO               | <a href="#">ATPase, P-type, K/Mg/Cd/Cu/Zn/Na/Ca/Na/H-transporter</a>                                  | RT       |  |  |  |  | 3     | 8.2E-1  | 1.0E0     |
| <input type="checkbox"/> | COG_ONTOLOGY           | <a href="#">Inorganic ion transport and metabolism</a>                                                | RT       |  |  |  |  | 6     | 9.7E-1  | 1.0E0     |
|                          | Annotation Cluster 245 | Enrichment Score: 0.08                                                                                | <b>G</b> |  |  |  |  | Count | P_Value | Benjamini |
| <input type="checkbox"/> | INTERPRO               | <a href="#">Sterile alpha motif-type</a>                                                              | RT       |  |  |  |  | 6     | 6.2E-1  | 1.0E0     |
| <input type="checkbox"/> | UP_SEQ_FEATURE         | domain:SAM                                                                                            | RT       |  |  |  |  | 3     | 9.0E-1  | 1.0E0     |
| <input type="checkbox"/> | SMART                  | <a href="#">SAM</a>                                                                                   | RT       |  |  |  |  | 4     | 9.2E-1  | 1.0E0     |
| <input type="checkbox"/> | INTERPRO               | <a href="#">Sterile alpha motif SAM</a>                                                               | RT       |  |  |  |  | 4     | 9.6E-1  | 1.0E0     |
|                          | Annotation Cluster 246 | Enrichment Score: 0.07                                                                                | <b>G</b> |  |  |  |  | Count | P_Value | Benjamini |
| <input type="checkbox"/> | GOTERM_BP_ALL          | <a href="#">lung development</a>                                                                      | RT       |  |  |  |  | 6     | 8.0E-1  | 1.0E0     |
| <input type="checkbox"/> | GOTERM_BP_ALL          | <a href="#">respiratory tube development</a>                                                          | RT       |  |  |  |  | 6     | 8.1E-1  | 1.0E0     |
| <input type="checkbox"/> | GOTERM_BP_ALL          | <a href="#">tube development</a>                                                                      | RT       |  |  |  |  | 13    | 9.8E-1  | 1.0E0     |
|                          | Annotation Cluster 247 | Enrichment Score: 0.07                                                                                | <b>G</b> |  |  |  |  | Count | P_Value | Benjamini |
| <input type="checkbox"/> | SMART                  | <a href="#">HMG</a>                                                                                   | RT       |  |  |  |  | 4     | 7.9E-1  | 1.0E0     |
| <input type="checkbox"/> | INTERPRO               | <a href="#">High mobility group box, HMG1/HMG2</a>                                                    | RT       |  |  |  |  | 4     | 8.6E-1  | 1.0E0     |
| <input type="checkbox"/> | INTERPRO               | <a href="#">High mobility group box, HMG</a>                                                          | RT       |  |  |  |  | 3     | 9.3E-1  | 1.0E0     |
|                          | Annotation Cluster 248 | Enrichment Score: 0.06                                                                                | <b>G</b> |  |  |  |  | Count | P_Value | Benjamini |
| <input type="checkbox"/> | GOTERM_BP_ALL          | <a href="#">male sex differentiation</a>                                                              | RT       |  |  |  |  | 4     | 5.7E-1  | 1.0E0     |
| <input type="checkbox"/> | GOTERM_BP_ALL          | <a href="#">development of primary male sexual characteristics</a>                                    | RT       |  |  |  |  | 3     | 7.2E-1  | 1.0E0     |
| <input type="checkbox"/> | GOTERM_BP_ALL          | <a href="#">development of primary sexual characteristics</a>                                         | RT       |  |  |  |  | 4     | 9.6E-1  | 1.0E0     |
| <input type="checkbox"/> | GOTERM_BP_ALL          | <a href="#">sex differentiation</a>                                                                   | RT       |  |  |  |  | 5     | 9.8E-1  | 1.0E0     |
| <input type="checkbox"/> | GOTERM_BP_ALL          | <a href="#">gonad development</a>                                                                     | RT       |  |  |  |  | 3     | 9.8E-1  | 1.0E0     |
| <input type="checkbox"/> | GOTERM_BP_ALL          | <a href="#">reproductive structure development</a>                                                    | RT       |  |  |  |  | 3     | 9.9E-1  | 1.0E0     |
| <input type="checkbox"/> | GOTERM_BP_ALL          | <a href="#">reproductive developmental process</a>                                                    | RT       |  |  |  |  | 5     | 9.9E-1  | 1.0E0     |
|                          | Annotation Cluster 249 | Enrichment Score: 0.06                                                                                | <b>G</b> |  |  |  |  | Count | P_Value | Benjamini |
| <input type="checkbox"/> | GOTERM_CC_ALL          | <a href="#">focal adhesion</a>                                                                        | RT       |  |  |  |  | 3     | 7.8E-1  | 1.0E0     |
| <input type="checkbox"/> | GOTERM_CC_ALL          | <a href="#">cell-substrate adherens junction</a>                                                      | RT       |  |  |  |  | 3     | 8.4E-1  | 1.0E0     |
| <input type="checkbox"/> | GOTERM_CC_ALL          | <a href="#">adherens junction</a>                                                                     | RT       |  |  |  |  | 5     | 8.7E-1  | 1.0E0     |
| <input type="checkbox"/> | GOTERM_CC_ALL          | <a href="#">cell-matrix junction</a>                                                                  | RT       |  |  |  |  | 3     | 8.8E-1  | 1.0E0     |
| <input type="checkbox"/> | GOTERM_CC_ALL          | <a href="#">basolateral plasma membrane</a>                                                           | RT       |  |  |  |  | 4     | 9.8E-1  | 1.0E0     |
|                          | Annotation Cluster 250 | Enrichment Score: 0.06                                                                                | <b>G</b> |  |  |  |  | Count | P_Value | Benjamini |
| <input type="checkbox"/> | SP_PIR_KEYWORDS        | <a href="#">sugar transport</a>                                                                       | RT       |  |  |  |  | 3     | 7.9E-1  | 1.0E0     |
| <input type="checkbox"/> | GOTERM_BP_ALL          | <a href="#">carbohydrate transport</a>                                                                | RT       |  |  |  |  | 6     | 8.1E-1  | 1.0E0     |
| <input type="checkbox"/> | GOTERM_MF_ALL          | <a href="#">sugar:hydrogen ion symporter activity</a>                                                 | RT       |  |  |  |  | 3     | 9.1E-1  | 1.0E0     |
| <input type="checkbox"/> | GOTERM_MF_ALL          | <a href="#">sugar transmembrane transporter activity</a>                                              | RT       |  |  |  |  | 3     | 9.1E-1  | 1.0E0     |
| <input type="checkbox"/> | GOTERM_MF_ALL          | <a href="#">carbohydrate transmembrane transporter activity</a>                                       | RT       |  |  |  |  | 3     | 9.2E-1  | 1.0E0     |
|                          | Annotation Cluster 251 | Enrichment Score: 0.06                                                                                | <b>G</b> |  |  |  |  | Count | P_Value | Benjamini |
| <input type="checkbox"/> | GOTERM_BP_ALL          | <a href="#">regulation of anatomical structure morphogenesis</a>                                      | RT       |  |  |  |  | 4     | 8.7E-1  | 1.0E0     |
| <input type="checkbox"/> | GOTERM_BP_ALL          | <a href="#">regulation of cell morphogenesis</a>                                                      | RT       |  |  |  |  | 4     | 8.7E-1  | 1.0E0     |
| <input type="checkbox"/> | GOTERM_BP_ALL          | <a href="#">regulation of cell shape</a>                                                              | RT       |  |  |  |  | 4     | 8.7E-1  | 1.0E0     |
|                          | Annotation Cluster 252 | Enrichment Score: 0.06                                                                                | <b>G</b> |  |  |  |  | Count | P_Value | Benjamini |
| <input type="checkbox"/> | GOTERM_BP_ALL          | <a href="#">chemotaxis</a>                                                                            | RT       |  |  |  |  | 11    | 6.3E-1  | 1.0E0     |
| <input type="checkbox"/> | GOTERM_BP_ALL          | <a href="#">taxis</a>                                                                                 | RT       |  |  |  |  | 11    | 6.3E-1  | 1.0E0     |
| <input type="checkbox"/> | GOTERM_BP_ALL          | <a href="#">response to wounding</a>                                                                  | RT       |  |  |  |  | 22    | 9.8E-1  | 1.0E0     |
| <input type="checkbox"/> | GOTERM_BP_ALL          | <a href="#">inflammatory response</a>                                                                 | RT       |  |  |  |  | 13    | 9.9E-1  | 1.0E0     |
| <input type="checkbox"/> | GOTERM_BP_ALL          | <a href="#">response to external stimulus</a>                                                         | RT       |  |  |  |  | 32    | 1.0E0   | 1.0E0     |

|                          |                        |                                                                                  |                    |  | Count | P_Value | Benjamini |
|--------------------------|------------------------|----------------------------------------------------------------------------------|--------------------|--|-------|---------|-----------|
| <input type="checkbox"/> | GOTERM_BP_ALL          | <a href="#">immune response</a>                                                  | <a href="#">RT</a> |  | 25    | 1.0E0   | 1.0E0     |
| <input type="checkbox"/> | GOTERM_BP_ALL          | <a href="#">defense response</a>                                                 | <a href="#">RT</a> |  | 22    | 1.0E0   | 1.0E0     |
|                          | Annotation Cluster 253 | Enrichment Score: 0.06                                                           | <b>G</b>           |  |       |         |           |
| <input type="checkbox"/> | GOTERM_BP_ALL          | <a href="#">humoral immune response</a>                                          | <a href="#">RT</a> |  | 7     | 5.2E-1  | 1.0E0     |
| <input type="checkbox"/> | GOTERM_BP_ALL          | <a href="#">complement activation</a>                                            | <a href="#">RT</a> |  | 4     | 7.4E-1  | 1.0E0     |
| <input type="checkbox"/> | GOTERM_BP_ALL          | <a href="#">activation of plasma proteins during acute inflammatory response</a> | <a href="#">RT</a> |  | 4     | 7.4E-1  | 1.0E0     |
| <input type="checkbox"/> | GOTERM_BP_ALL          | <a href="#">immune effector process</a>                                          | <a href="#">RT</a> |  | 12    | 7.8E-1  | 1.0E0     |
| <input type="checkbox"/> | GOTERM_BP_ALL          | <a href="#">activation of immune response</a>                                    | <a href="#">RT</a> |  | 5     | 9.4E-1  | 1.0E0     |
| <input type="checkbox"/> | GOTERM_BP_ALL          | <a href="#">positive regulation of immune response</a>                           | <a href="#">RT</a> |  | 5     | 9.9E-1  | 1.0E0     |
| <input type="checkbox"/> | GOTERM_BP_ALL          | <a href="#">acute inflammatory response</a>                                      | <a href="#">RT</a> |  | 4     | 9.9E-1  | 1.0E0     |
| <input type="checkbox"/> | GOTERM_BP_ALL          | <a href="#">positive regulation of immune system process</a>                     | <a href="#">RT</a> |  | 5     | 9.9E-1  | 1.0E0     |
| <input type="checkbox"/> | GOTERM_BP_ALL          | <a href="#">regulation of immune response</a>                                    | <a href="#">RT</a> |  | 5     | 1.0E0   | 1.0E0     |
| <input type="checkbox"/> | GOTERM_BP_ALL          | <a href="#">regulation of immune system process</a>                              | <a href="#">RT</a> |  | 5     | 1.0E0   | 1.0E0     |
| <input type="checkbox"/> | GOTERM_BP_ALL          | <a href="#">positive regulation of multicellular organismal process</a>          | <a href="#">RT</a> |  | 5     | 1.0E0   | 1.0E0     |
| <input type="checkbox"/> | GOTERM_BP_ALL          | <a href="#">regulation of multicellular organismal process</a>                   | <a href="#">RT</a> |  | 14    | 1.0E0   | 1.0E0     |
|                          | Annotation Cluster 254 | Enrichment Score: 0.06                                                           | <b>G</b>           |  |       |         |           |
| <input type="checkbox"/> | GOTERM_BP_ALL          | <a href="#">regulation of cell growth</a>                                        | <a href="#">RT</a> |  | 9     | 7.8E-1  | 1.0E0     |
| <input type="checkbox"/> | GOTERM_BP_ALL          | <a href="#">regulation of cell size</a>                                          | <a href="#">RT</a> |  | 11    | 8.5E-1  | 1.0E0     |
| <input type="checkbox"/> | GOTERM_BP_ALL          | <a href="#">cell growth</a>                                                      | <a href="#">RT</a> |  | 10    | 8.5E-1  | 1.0E0     |
| <input type="checkbox"/> | GOTERM_BP_ALL          | <a href="#">regulation of growth</a>                                             | <a href="#">RT</a> |  | 12    | 9.5E-1  | 1.0E0     |
| <input type="checkbox"/> | GOTERM_BP_ALL          | <a href="#">growth</a>                                                           | <a href="#">RT</a> |  | 19    | 9.7E-1  | 1.0E0     |
|                          | Annotation Cluster 255 | Enrichment Score: 0.05                                                           | <b>G</b>           |  |       |         |           |
| <input type="checkbox"/> | GOTERM_BP_ALL          | <a href="#">B cell activation</a>                                                | <a href="#">RT</a> |  | 9     | 6.9E-1  | 1.0E0     |
| <input type="checkbox"/> | GOTERM_BP_ALL          | <a href="#">positive regulation of B cell activation</a>                         | <a href="#">RT</a> |  | 3     | 7.9E-1  | 1.0E0     |
| <input type="checkbox"/> | GOTERM_BP_ALL          | <a href="#">regulation of B cell activation</a>                                  | <a href="#">RT</a> |  | 4     | 8.0E-1  | 1.0E0     |
| <input type="checkbox"/> | GOTERM_BP_ALL          | <a href="#">positive regulation of lymphocyte activation</a>                     | <a href="#">RT</a> |  | 5     | 9.2E-1  | 1.0E0     |
| <input type="checkbox"/> | GOTERM_BP_ALL          | <a href="#">regulation of lymphocyte activation</a>                              | <a href="#">RT</a> |  | 7     | 9.3E-1  | 1.0E0     |
| <input type="checkbox"/> | GOTERM_BP_ALL          | <a href="#">regulation of cell activation</a>                                    | <a href="#">RT</a> |  | 7     | 9.5E-1  | 1.0E0     |
| <input type="checkbox"/> | GOTERM_BP_ALL          | <a href="#">regulation of T cell activation</a>                                  | <a href="#">RT</a> |  | 4     | 9.8E-1  | 1.0E0     |
| <input type="checkbox"/> | GOTERM_BP_ALL          | <a href="#">regulation of lymphocyte proliferation</a>                           | <a href="#">RT</a> |  | 3     | 9.9E-1  | 1.0E0     |
| <input type="checkbox"/> | GOTERM_BP_ALL          | <a href="#">regulation of mononuclear cell proliferation</a>                     | <a href="#">RT</a> |  | 3     | 9.9E-1  | 1.0E0     |
|                          | Annotation Cluster 256 | Enrichment Score: 0.05                                                           | <b>G</b>           |  |       |         |           |
| <input type="checkbox"/> | GOTERM_BP_ALL          | <a href="#">proteolysis</a>                                                      | <a href="#">RT</a> |  | 62    | 8.0E-1  | 1.0E0     |
| <input type="checkbox"/> | SP_PIR_KEYWORDS        | <a href="#">protease</a>                                                         | <a href="#">RT</a> |  | 39    | 8.3E-1  | 1.0E0     |
| <input type="checkbox"/> | GOTERM_MF_ALL          | <a href="#">peptidase activity</a>                                               | <a href="#">RT</a> |  | 51    | 9.7E-1  | 1.0E0     |
| <input type="checkbox"/> | GOTERM_MF_ALL          | <a href="#">endopeptidase activity</a>                                           | <a href="#">RT</a> |  | 26    | 1.0E0   | 1.0E0     |
|                          | Annotation Cluster 257 | Enrichment Score: 0.05                                                           | <b>G</b>           |  |       |         |           |
| <input type="checkbox"/> | INTERPRO               | <a href="#">Variant SH3</a>                                                      | <a href="#">RT</a> |  | 6     | 5.1E-1  | 1.0E0     |
| <input type="checkbox"/> | SMART                  | <a href="#">SH2</a>                                                              | <a href="#">RT</a> |  | 6     | 9.2E-1  | 1.0E0     |
| <input type="checkbox"/> | SMART                  | <a href="#">SH3</a>                                                              | <a href="#">RT</a> |  | 10    | 9.5E-1  | 1.0E0     |
| <input type="checkbox"/> | INTERPRO               | <a href="#">SH2 motif</a>                                                        | <a href="#">RT</a> |  | 6     | 9.7E-1  | 1.0E0     |
| <input type="checkbox"/> | SP_PIR_KEYWORDS        | <a href="#">sh2 domain</a>                                                       | <a href="#">RT</a> |  | 6     | 9.8E-1  | 1.0E0     |
| <input type="checkbox"/> | INTERPRO               | <a href="#">Src homology-3</a>                                                   | <a href="#">RT</a> |  | 10    | 9.9E-1  | 1.0E0     |
| <input type="checkbox"/> | SP_PIR_KEYWORDS        | <a href="#">SH3 domain</a>                                                       | <a href="#">RT</a> |  | 10    | 9.9E-1  | 1.0E0     |
| <input type="checkbox"/> | UP_SEQ_FEATURE         | domain:SH3                                                                       | <a href="#">RT</a> |  | 4     | 1.0E0   | 1.0E0     |
|                          | Annotation Cluster 258 | Enrichment Score: 0.05                                                           | <b>G</b>           |  |       |         |           |
| <input type="checkbox"/> | GOTERM_CC_ALL          | <a href="#">basement membrane</a>                                                | <a href="#">RT</a> |  | 6     | 7.4E-1  | 1.0E0     |
| <input type="checkbox"/> | GOTERM_BP_ALL          | <a href="#">extracellular matrix organization and</a>                            | <a href="#">RT</a> |  | 6     | 7.4E-1  | 1.0E0     |



|                          |                        |                                                                      |                    |  | Count | P_Value | Benjamini |
|--------------------------|------------------------|----------------------------------------------------------------------|--------------------|--|-------|---------|-----------|
| <input type="checkbox"/> |                        | <a href="#">biogenesis</a>                                           | <a href="#">RT</a> |  | 0     | 7.4E-1  | 1.0E0     |
| <input type="checkbox"/> | SP_PIR_KEYWORDS        | <a href="#">basement membrane</a>                                    | <a href="#">RT</a> |  | 3     | 8.1E-1  | 1.0E0     |
| <input type="checkbox"/> | GOTERM_BP_ALL          | <a href="#">extracellular structure organization and biogenesis</a>  | <a href="#">RT</a> |  | 8     | 9.1E-1  | 1.0E0     |
| <input type="checkbox"/> | GOTERM_CC_ALL          | <a href="#">extracellular matrix part</a>                            | <a href="#">RT</a> |  | 6     | 9.6E-1  | 1.0E0     |
| <input type="checkbox"/> | GOTERM_MF_ALL          | <a href="#">extracellular matrix structural constituent</a>          | <a href="#">RT</a> |  | 3     | 9.9E-1  | 1.0E0     |
| <input type="checkbox"/> | SP_PIR_KEYWORDS        | <a href="#">extracellular matrix</a>                                 | <a href="#">RT</a> |  | 7     | 1.0E0   | 1.0E0     |
| <input type="checkbox"/> | GOTERM_CC_ALL          | <a href="#">proteinaceous extracellular matrix</a>                   | <a href="#">RT</a> |  | 9     | 1.0E0   | 1.0E0     |
| <input type="checkbox"/> | GOTERM_CC_ALL          | <a href="#">extracellular matrix</a>                                 | <a href="#">RT</a> |  | 9     | 1.0E0   | 1.0E0     |
|                          | Annotation Cluster 259 | Enrichment Score: 0.05                                               | <b>G</b>           |  |       |         |           |
| <input type="checkbox"/> | BIOCARTA               | <a href="#">Role of MAL in Rho-Mediated Activation of SRF</a>        | <a href="#">RT</a> |  | 3     | 8.1E-1  | 9.9E-1    |
| <input type="checkbox"/> | BIOCARTA               | <a href="#">Ras Signaling Pathway</a>                                | <a href="#">RT</a> |  | 3     | 8.3E-1  | 9.9E-1    |
| <input type="checkbox"/> | KEGG_PATHWAY           | <a href="#">VEGF signaling pathway</a>                               | <a href="#">RT</a> |  | 5     | 9.9E-1  | 1.0E0     |
| <input type="checkbox"/> | KEGG_PATHWAY           | <a href="#">Axon guidance</a>                                        | <a href="#">RT</a> |  | 9     | 9.9E-1  | 1.0E0     |
|                          | Annotation Cluster 260 | Enrichment Score: 0.04                                               | <b>G</b>           |  |       |         |           |
| <input type="checkbox"/> | GOTERM_MF_ALL          | <a href="#">enzyme inhibitor activity</a>                            | <a href="#">RT</a> |  | 20    | 6.6E-1  | 1.0E0     |
| <input type="checkbox"/> | GOTERM_MF_ALL          | <a href="#">endopeptidase inhibitor activity</a>                     | <a href="#">RT</a> |  | 8     | 9.8E-1  | 1.0E0     |
| <input type="checkbox"/> | GOTERM_MF_ALL          | <a href="#">protease inhibitor activity</a>                          | <a href="#">RT</a> |  | 8     | 9.9E-1  | 1.0E0     |
| <input type="checkbox"/> | GOTERM_MF_ALL          | <a href="#">serine-type endopeptidase inhibitor activity</a>         | <a href="#">RT</a> |  | 5     | 9.9E-1  | 1.0E0     |
| <input type="checkbox"/> | SP_PIR_KEYWORDS        | <a href="#">protease inhibitor</a>                                   | <a href="#">RT</a> |  | 3     | 1.0E0   | 1.0E0     |
|                          | Annotation Cluster 261 | Enrichment Score: 0.03                                               | <b>G</b>           |  |       |         |           |
| <input type="checkbox"/> | SP_PIR_KEYWORDS        | <a href="#">glycosidase</a>                                          | <a href="#">RT</a> |  | 4     | 9.1E-1  | 1.0E0     |
| <input type="checkbox"/> | GOTERM_MF_ALL          | <a href="#">hydrolase activity, hydrolyzing O-glycosyl compounds</a> | <a href="#">RT</a> |  | 6     | 9.4E-1  | 1.0E0     |
| <input type="checkbox"/> | GOTERM_MF_ALL          | <a href="#">hydrolase activity, acting on glycosyl bonds</a>         | <a href="#">RT</a> |  | 7     | 9.6E-1  | 1.0E0     |
|                          | Annotation Cluster 262 | Enrichment Score: 0.03                                               | <b>G</b>           |  |       |         |           |
| <input type="checkbox"/> | GOTERM_BP_ALL          | <a href="#">sensory perception of sound</a>                          | <a href="#">RT</a> |  | 6     | 7.9E-1  | 1.0E0     |
| <input type="checkbox"/> | GOTERM_BP_ALL          | <a href="#">sensory perception of mechanical stimulus</a>            | <a href="#">RT</a> |  | 6     | 8.7E-1  | 1.0E0     |
| <input type="checkbox"/> | GOTERM_BP_ALL          | <a href="#">sensory perception</a>                                   | <a href="#">RT</a> |  | 10    | 1.0E0   | 1.0E0     |
| <input type="checkbox"/> | GOTERM_BP_ALL          | <a href="#">transmission of nerve impulse</a>                        | <a href="#">RT</a> |  | 8     | 1.0E0   | 1.0E0     |
| <input type="checkbox"/> | GOTERM_BP_ALL          | <a href="#">neurological system process</a>                          | <a href="#">RT</a> |  | 17    | 1.0E0   | 1.0E0     |
| <input type="checkbox"/> | GOTERM_BP_ALL          | <a href="#">system process</a>                                       | <a href="#">RT</a> |  | 24    | 1.0E0   | 1.0E0     |
|                          | Annotation Cluster 263 | Enrichment Score: 0.02                                               | <b>G</b>           |  |       |         |           |
| <input type="checkbox"/> | UP_SEQ_FEATURE         | domain:C2 1                                                          | <a href="#">RT</a> |  | 3     | 9.2E-1  | 1.0E0     |
| <input type="checkbox"/> | UP_SEQ_FEATURE         | domain:C2 2                                                          | <a href="#">RT</a> |  | 3     | 9.2E-1  | 1.0E0     |
| <input type="checkbox"/> | SMART                  | <a href="#">C2</a>                                                   | <a href="#">RT</a> |  | 6     | 9.6E-1  | 1.0E0     |
| <input type="checkbox"/> | INTERPRO               | <a href="#">C2 calcium-dependent membrane targeting</a>              | <a href="#">RT</a> |  | 6     | 9.9E-1  | 1.0E0     |
|                          | Annotation Cluster 264 | Enrichment Score: 0.02                                               | <b>G</b>           |  |       |         |           |
| <input type="checkbox"/> | SMART                  | <a href="#">ANK</a>                                                  | <a href="#">RT</a> |  | 13    | 8.2E-1  | 1.0E0     |
| <input type="checkbox"/> | UP_SEQ_FEATURE         | repeat:ANK 3                                                         | <a href="#">RT</a> |  | 6     | 9.2E-1  | 1.0E0     |
| <input type="checkbox"/> | UP_SEQ_FEATURE         | repeat:ANK 1                                                         | <a href="#">RT</a> |  | 6     | 9.7E-1  | 1.0E0     |
| <input type="checkbox"/> | UP_SEQ_FEATURE         | repeat:ANK 2                                                         | <a href="#">RT</a> |  | 6     | 9.7E-1  | 1.0E0     |
| <input type="checkbox"/> | UP_SEQ_FEATURE         | repeat:ANK 5                                                         | <a href="#">RT</a> |  | 3     | 9.8E-1  | 1.0E0     |
| <input type="checkbox"/> | INTERPRO               | <a href="#">Ankyrin</a>                                              | <a href="#">RT</a> |  | 10    | 9.8E-1  | 1.0E0     |
| <input type="checkbox"/> | UP_SEQ_FEATURE         | repeat:ANK 4                                                         | <a href="#">RT</a> |  | 3     | 9.9E-1  | 1.0E0     |
| <input type="checkbox"/> | SP_PIR_KEYWORDS        | <a href="#">ank repeat</a>                                           | <a href="#">RT</a> |  | 10    | 9.9E-1  | 1.0E0     |
|                          | Annotation Cluster 265 | Enrichment Score: 0.02                                               | <b>G</b>           |  |       |         |           |
| <input type="checkbox"/> | GOTERM_BP_ALL          | <a href="#">immune effector process</a>                              | <a href="#">RT</a> |  | 12    | 7.8E-1  | 1.0E0     |
| <input type="checkbox"/> | GOTERM_BP_ALL          | <a href="#">leukocyte mediated immunity</a>                          | <a href="#">RT</a> |  | 6     | 9.7E-1  | 1.0E0     |
| <input type="checkbox"/> | GOTERM_BP_ALL          | <a href="#">B cell mediated immunity</a>                             | <a href="#">RT</a> |  | 4     | 9.8E-1  | 1.0E0     |

| <input type="checkbox"/> | GOTERM_BP_ALL          | <a href="#">immunoglobulin mediated immune response</a>                                                                                       | <a href="#">RT</a> |  |  |  | 3     | 9.9E-1  | 1.0E0     |  |
|--------------------------|------------------------|-----------------------------------------------------------------------------------------------------------------------------------------------|--------------------|--|--|--|-------|---------|-----------|--|
| <input type="checkbox"/> | GOTERM_BP_ALL          | <a href="#">lymphocyte mediated immunity</a>                                                                                                  | <a href="#">RT</a> |  |  |  | 4     | 1.0E0   | 1.0E0     |  |
| <input type="checkbox"/> | GOTERM_BP_ALL          | <a href="#">adaptive immune response based on somatic recombination of immune receptors built from immunoglobulin superfamily domains</a>     | <a href="#">RT</a> |  |  |  | 4     | 1.0E0   | 1.0E0     |  |
| <input type="checkbox"/> | GOTERM_BP_ALL          | <a href="#">adaptive immune response</a>                                                                                                      | <a href="#">RT</a> |  |  |  | 4     | 1.0E0   | 1.0E0     |  |
|                          | Annotation Cluster 266 | Enrichment Score: 0.02                                                                                                                        | <b>G</b>           |  |  |  | Count | P_Value | Benjamini |  |
| <input type="checkbox"/> | INTERPRO               | <a href="#">EGF calcium-binding</a>                                                                                                           | <a href="#">RT</a> |  |  |  | 5     | 8.1E-1  | 1.0E0     |  |
| <input type="checkbox"/> | UP_SEQ_FEATURE         | domain:EGF-like 2; calcium-binding                                                                                                            | <a href="#">RT</a> |  |  |  | 3     | 8.8E-1  | 1.0E0     |  |
| <input type="checkbox"/> | SMART                  | <a href="#">EGF_CA</a>                                                                                                                        | <a href="#">RT</a> |  |  |  | 5     | 9.1E-1  | 1.0E0     |  |
| <input type="checkbox"/> | INTERPRO               | <a href="#">Aspartic acid and asparagine hydroxylation site</a>                                                                               | <a href="#">RT</a> |  |  |  | 5     | 9.5E-1  | 1.0E0     |  |
| <input type="checkbox"/> | INTERPRO               | <a href="#">EGF-like calcium-binding</a>                                                                                                      | <a href="#">RT</a> |  |  |  | 5     | 9.6E-1  | 1.0E0     |  |
| <input type="checkbox"/> | SMART                  | <a href="#">EGF</a>                                                                                                                           | <a href="#">RT</a> |  |  |  | 7     | 9.9E-1  | 1.0E0     |  |
| <input type="checkbox"/> | UP_SEQ_FEATURE         | domain:EGF-like 1                                                                                                                             | <a href="#">RT</a> |  |  |  | 3     | 9.9E-1  | 1.0E0     |  |
| <input type="checkbox"/> | INTERPRO               | <a href="#">EGF-like</a>                                                                                                                      | <a href="#">RT</a> |  |  |  | 5     | 1.0E0   | 1.0E0     |  |
| <input type="checkbox"/> | INTERPRO               | <a href="#">EGF-like, type 3</a>                                                                                                              | <a href="#">RT</a> |  |  |  | 7     | 1.0E0   | 1.0E0     |  |
| <input type="checkbox"/> | INTERPRO               | <a href="#">EGF</a>                                                                                                                           | <a href="#">RT</a> |  |  |  | 7     | 1.0E0   | 1.0E0     |  |
| <input type="checkbox"/> | INTERPRO               | <a href="#">EGF-like region</a>                                                                                                               | <a href="#">RT</a> |  |  |  | 9     | 1.0E0   | 1.0E0     |  |
| <input type="checkbox"/> | SP_PIR_KEYWORDS        | <a href="#">egf-like domain</a>                                                                                                               | <a href="#">RT</a> |  |  |  | 7     | 1.0E0   | 1.0E0     |  |
|                          | Annotation Cluster 267 | Enrichment Score: 0.02                                                                                                                        | <b>G</b>           |  |  |  | Count | P_Value | Benjamini |  |
| <input type="checkbox"/> | GOTERM_BP_ALL          | <a href="#">regulation of protein amino acid phosphorylation</a>                                                                              | <a href="#">RT</a> |  |  |  | 4     | 9.3E-1  | 1.0E0     |  |
| <input type="checkbox"/> | GOTERM_BP_ALL          | <a href="#">regulation of amino acid metabolic process</a>                                                                                    | <a href="#">RT</a> |  |  |  | 4     | 9.3E-1  | 1.0E0     |  |
| <input type="checkbox"/> | GOTERM_BP_ALL          | <a href="#">regulation of amine metabolic process</a>                                                                                         | <a href="#">RT</a> |  |  |  | 4     | 9.3E-1  | 1.0E0     |  |
| <input type="checkbox"/> | GOTERM_BP_ALL          | <a href="#">positive regulation of protein metabolic process</a>                                                                              | <a href="#">RT</a> |  |  |  | 6     | 9.5E-1  | 1.0E0     |  |
| <input type="checkbox"/> | GOTERM_BP_ALL          | <a href="#">regulation of phosphorylation</a>                                                                                                 | <a href="#">RT</a> |  |  |  | 4     | 9.6E-1  | 1.0E0     |  |
| <input type="checkbox"/> | GOTERM_BP_ALL          | <a href="#">regulation of phosphorus metabolic process</a>                                                                                    | <a href="#">RT</a> |  |  |  | 4     | 9.7E-1  | 1.0E0     |  |
| <input type="checkbox"/> | GOTERM_BP_ALL          | <a href="#">regulation of phosphate metabolic process</a>                                                                                     | <a href="#">RT</a> |  |  |  | 4     | 9.7E-1  | 1.0E0     |  |
| <input type="checkbox"/> | GOTERM_BP_ALL          | <a href="#">multi-organism process</a>                                                                                                        | <a href="#">RT</a> |  |  |  | 8     | 1.0E0   | 1.0E0     |  |
|                          | Annotation Cluster 268 | Enrichment Score: 0.02                                                                                                                        | <b>G</b>           |  |  |  | Count | P_Value | Benjamini |  |
| <input type="checkbox"/> | SP_PIR_KEYWORDS        | <a href="#">Dioxygenase</a>                                                                                                                   | <a href="#">RT</a> |  |  |  | 3     | 9.2E-1  | 1.0E0     |  |
| <input type="checkbox"/> | GOTERM_MF_ALL          | <a href="#">dioxygenase activity</a>                                                                                                          | <a href="#">RT</a> |  |  |  | 3     | 9.7E-1  | 1.0E0     |  |
| <input type="checkbox"/> | GOTERM_MF_ALL          | <a href="#">oxidoreductase activity, acting on single donors with incorporation of molecular oxygen, incorporation of two atoms of oxygen</a> | <a href="#">RT</a> |  |  |  | 3     | 9.7E-1  | 1.0E0     |  |
| <input type="checkbox"/> | GOTERM_MF_ALL          | <a href="#">oxidoreductase activity, acting on single donors with incorporation of molecular oxygen</a>                                       | <a href="#">RT</a> |  |  |  | 3     | 9.8E-1  | 1.0E0     |  |
|                          | Annotation Cluster 269 | Enrichment Score: 0.01                                                                                                                        | <b>G</b>           |  |  |  | Count | P_Value | Benjamini |  |
| <input type="checkbox"/> | SMART                  | <a href="#">LIM</a>                                                                                                                           | <a href="#">RT</a> |  |  |  | 3     | 9.5E-1  | 1.0E0     |  |
| <input type="checkbox"/> | INTERPRO               | <a href="#">Zinc finger, LIM-type</a>                                                                                                         | <a href="#">RT</a> |  |  |  | 3     | 9.8E-1  | 1.0E0     |  |
| <input type="checkbox"/> | SP_PIR_KEYWORDS        | <a href="#">lim domain</a>                                                                                                                    | <a href="#">RT</a> |  |  |  | 3     | 9.8E-1  | 1.0E0     |  |
|                          | Annotation Cluster 270 | Enrichment Score: 0.01                                                                                                                        | <b>G</b>           |  |  |  | Count | P_Value | Benjamini |  |
| <input type="checkbox"/> | GOTERM_BP_ALL          | <a href="#">amino acid catabolic process</a>                                                                                                  | <a href="#">RT</a> |  |  |  | 3     | 9.6E-1  | 1.0E0     |  |
| <input type="checkbox"/> | GOTERM_BP_ALL          | <a href="#">nitrogen compound catabolic process</a>                                                                                           | <a href="#">RT</a> |  |  |  | 3     | 9.8E-1  | 1.0E0     |  |
| <input type="checkbox"/> | GOTERM_BP_ALL          | <a href="#">amine catabolic process</a>                                                                                                       | <a href="#">RT</a> |  |  |  | 3     | 9.8E-1  | 1.0E0     |  |
|                          | Annotation Cluster 271 | Enrichment Score: 0.01                                                                                                                        | <b>G</b>           |  |  |  | Count | P_Value | Benjamini |  |
| <input type="checkbox"/> | GOTERM_BP_ALL          | <a href="#">wound healing</a>                                                                                                                 | <a href="#">RT</a> |  |  |  | 6     | 9.5E-1  | 1.0E0     |  |
| <input type="checkbox"/> | GOTERM_BP_ALL          | <a href="#">blood coagulation</a>                                                                                                             | <a href="#">RT</a> |  |  |  | 3     | 9.8E-1  | 1.0E0     |  |
| <input type="checkbox"/> | GOTERM_BP_ALL          | <a href="#">coagulation</a>                                                                                                                   | <a href="#">RT</a> |  |  |  | 3     | 9.8E-1  | 1.0E0     |  |
| <input type="checkbox"/> | GOTERM_BP_ALL          | <a href="#">regulation of body fluid levels</a>                                                                                               | <a href="#">RT</a> |  |  |  | 4     | 9.8E-1  | 1.0E0     |  |

| <input type="checkbox"/> |                        |                                                                                    |                        |  |          |  |  |       |         |           |
|--------------------------|------------------------|------------------------------------------------------------------------------------|------------------------|--|----------|--|--|-------|---------|-----------|
| <input type="checkbox"/> | GOTERM_BP_ALL          | <a href="#">hemostasis</a>                                                         | <a href="#">RT</a>     |  |          |  |  | 3     | 9.9E-1  | 1.0E0     |
|                          | Annotation Cluster 272 |                                                                                    | Enrichment Score: 0.01 |  | <b>G</b> |  |  | Count | P_Value | Benjamini |
| <input type="checkbox"/> | UP_SEQ_FEATURE         | repeat:LRR 6                                                                       | <a href="#">RT</a>     |  |          |  |  | 5     | 9.4E-1  | 1.0E0     |
| <input type="checkbox"/> | UP_SEQ_FEATURE         | repeat:LRR 5                                                                       | <a href="#">RT</a>     |  |          |  |  | 5     | 9.7E-1  | 1.0E0     |
| <input type="checkbox"/> | UP_SEQ_FEATURE         | repeat:LRR 3                                                                       | <a href="#">RT</a>     |  |          |  |  | 6     | 9.8E-1  | 1.0E0     |
| <input type="checkbox"/> | UP_SEQ_FEATURE         | repeat:LRR 1                                                                       | <a href="#">RT</a>     |  |          |  |  | 6     | 9.8E-1  | 1.0E0     |
| <input type="checkbox"/> | UP_SEQ_FEATURE         | repeat:LRR 2                                                                       | <a href="#">RT</a>     |  |          |  |  | 6     | 9.8E-1  | 1.0E0     |
| <input type="checkbox"/> | UP_SEQ_FEATURE         | repeat:LRR 4                                                                       | <a href="#">RT</a>     |  |          |  |  | 5     | 9.8E-1  | 1.0E0     |
| <input type="checkbox"/> | UP_SEQ_FEATURE         | repeat:LRR 8                                                                       | <a href="#">RT</a>     |  |          |  |  | 3     | 9.9E-1  | 1.0E0     |
| <input type="checkbox"/> | UP_SEQ_FEATURE         | repeat:LRR 7                                                                       | <a href="#">RT</a>     |  |          |  |  | 3     | 9.9E-1  | 1.0E0     |
| <input type="checkbox"/> | INTERPRO               | <a href="#">Leucine-rich repeat</a>                                                | <a href="#">RT</a>     |  |          |  |  | 7     | 1.0E0   | 1.0E0     |
| <input type="checkbox"/> | SP_PIR_KEYWORDS        | <a href="#">leucine-rich repeat</a>                                                | <a href="#">RT</a>     |  |          |  |  | 8     | 1.0E0   | 1.0E0     |
|                          | Annotation Cluster 273 |                                                                                    | Enrichment Score: 0.01 |  | <b>G</b> |  |  | Count | P_Value | Benjamini |
| <input type="checkbox"/> | GOTERM_BP_ALL          | <a href="#">myoblast differentiation</a>                                           | <a href="#">RT</a>     |  |          |  |  | 3     | 9.3E-1  | 1.0E0     |
| <input type="checkbox"/> | GOTERM_BP_ALL          | <a href="#">skeletal muscle development</a>                                        | <a href="#">RT</a>     |  |          |  |  | 6     | 9.8E-1  | 1.0E0     |
| <input type="checkbox"/> | GOTERM_BP_ALL          | <a href="#">skeletal muscle fiber development</a>                                  | <a href="#">RT</a>     |  |          |  |  | 3     | 9.9E-1  | 1.0E0     |
| <input type="checkbox"/> | GOTERM_BP_ALL          | <a href="#">muscle fiber development</a>                                           | <a href="#">RT</a>     |  |          |  |  | 3     | 9.9E-1  | 1.0E0     |
| <input type="checkbox"/> | GOTERM_BP_ALL          | <a href="#">muscle cell differentiation</a>                                        | <a href="#">RT</a>     |  |          |  |  | 3     | 1.0E0   | 1.0E0     |
| <input type="checkbox"/> | GOTERM_BP_ALL          | <a href="#">striated muscle development</a>                                        | <a href="#">RT</a>     |  |          |  |  | 6     | 1.0E0   | 1.0E0     |
| <input type="checkbox"/> | GOTERM_BP_ALL          | <a href="#">muscle development</a>                                                 | <a href="#">RT</a>     |  |          |  |  | 8     | 1.0E0   | 1.0E0     |
|                          | Annotation Cluster 274 |                                                                                    | Enrichment Score: 0.01 |  | <b>G</b> |  |  | Count | P_Value | Benjamini |
| <input type="checkbox"/> | GOTERM_BP_ALL          | <a href="#">tube morphogenesis</a>                                                 | <a href="#">RT</a>     |  |          |  |  | 9     | 9.8E-1  | 1.0E0     |
| <input type="checkbox"/> | GOTERM_BP_ALL          | <a href="#">branching morphogenesis of a tube</a>                                  | <a href="#">RT</a>     |  |          |  |  | 3     | 9.9E-1  | 1.0E0     |
| <input type="checkbox"/> | GOTERM_BP_ALL          | <a href="#">morphogenesis of a branching structure</a>                             | <a href="#">RT</a>     |  |          |  |  | 3     | 9.9E-1  | 1.0E0     |
|                          | Annotation Cluster 275 |                                                                                    | Enrichment Score: 0.01 |  | <b>G</b> |  |  | Count | P_Value | Benjamini |
| <input type="checkbox"/> | GOTERM_BP_ALL          | <a href="#">G-protein signaling, coupled to cAMP nucleotide second messenger</a>   | <a href="#">RT</a>     |  |          |  |  | 3     | 9.8E-1  | 1.0E0     |
| <input type="checkbox"/> | GOTERM_BP_ALL          | <a href="#">G-protein signaling, coupled to cyclic nucleotide second messenger</a> | <a href="#">RT</a>     |  |          |  |  | 3     | 9.9E-1  | 1.0E0     |
| <input type="checkbox"/> | GOTERM_BP_ALL          | <a href="#">cAMP-mediated signaling</a>                                            | <a href="#">RT</a>     |  |          |  |  | 3     | 9.9E-1  | 1.0E0     |
| <input type="checkbox"/> | GOTERM_BP_ALL          | <a href="#">cyclic-nucleotide-mediated signaling</a>                               | <a href="#">RT</a>     |  |          |  |  | 3     | 9.9E-1  | 1.0E0     |
|                          | Annotation Cluster 276 |                                                                                    | Enrichment Score: 0.01 |  | <b>G</b> |  |  | Count | P_Value | Benjamini |
| <input type="checkbox"/> | GOTERM_BP_ALL          | <a href="#">Ras protein signal transduction</a>                                    | <a href="#">RT</a>     |  |          |  |  | 13    | 9.6E-1  | 1.0E0     |
| <input type="checkbox"/> | GOTERM_MF_ALL          | <a href="#">small GTPase regulator activity</a>                                    | <a href="#">RT</a>     |  |          |  |  | 10    | 1.0E0   | 1.0E0     |
| <input type="checkbox"/> | GOTERM_BP_ALL          | <a href="#">regulation of Ras protein signal transduction</a>                      | <a href="#">RT</a>     |  |          |  |  | 6     | 1.0E0   | 1.0E0     |
| <input type="checkbox"/> | GOTERM_BP_ALL          | <a href="#">regulation of small GTPase mediated signal transduction</a>            | <a href="#">RT</a>     |  |          |  |  | 8     | 1.0E0   | 1.0E0     |
|                          | Annotation Cluster 277 |                                                                                    | Enrichment Score: 0.01 |  | <b>G</b> |  |  | Count | P_Value | Benjamini |
| <input type="checkbox"/> | GOTERM_BP_ALL          | <a href="#">regulation of blood pressure</a>                                       | <a href="#">RT</a>     |  |          |  |  | 3     | 9.7E-1  | 1.0E0     |
| <input type="checkbox"/> | GOTERM_BP_ALL          | <a href="#">blood circulation</a>                                                  | <a href="#">RT</a>     |  |          |  |  | 5     | 1.0E0   | 1.0E0     |
| <input type="checkbox"/> | GOTERM_BP_ALL          | <a href="#">circulatory system process</a>                                         | <a href="#">RT</a>     |  |          |  |  | 5     | 1.0E0   | 1.0E0     |
|                          | Annotation Cluster 278 |                                                                                    | Enrichment Score: 0    |  | <b>G</b> |  |  | Count | P_Value | Benjamini |
| <input type="checkbox"/> | SP_PIR_KEYWORDS        | <a href="#">heparin-binding</a>                                                    | <a href="#">RT</a>     |  |          |  |  | 3     | 9.7E-1  | 1.0E0     |
| <input type="checkbox"/> | GOTERM_MF_ALL          | <a href="#">heparin binding</a>                                                    | <a href="#">RT</a>     |  |          |  |  | 3     | 9.9E-1  | 1.0E0     |
| <input type="checkbox"/> | GOTERM_MF_ALL          | <a href="#">glycosaminoglycan binding</a>                                          | <a href="#">RT</a>     |  |          |  |  | 4     | 9.9E-1  | 1.0E0     |
| <input type="checkbox"/> | GOTERM_MF_ALL          | <a href="#">polysaccharide binding</a>                                             | <a href="#">RT</a>     |  |          |  |  | 4     | 1.0E0   | 1.0E0     |
| <input type="checkbox"/> | GOTERM_MF_ALL          | <a href="#">pattern binding</a>                                                    | <a href="#">RT</a>     |  |          |  |  | 4     | 1.0E0   | 1.0E0     |
|                          | Annotation Cluster 279 |                                                                                    | Enrichment Score: 0    |  | <b>G</b> |  |  | Count | P_Value | Benjamini |
| <input type="checkbox"/> | SP_PIR_KEYWORDS        | <a href="#">potassium</a>                                                          | <a href="#">RT</a>     |  |          |  |  | 5     | 9.8E-1  | 1.0E0     |
| <input type="checkbox"/> | GOTERM_MF_ALL          | <a href="#">potassium ion binding</a>                                              | <a href="#">RT</a>     |  |          |  |  | 5     | 9.9E-1  | 1.0E0     |
| <input type="checkbox"/> | GOTERM_MF_ALL          | <a href="#">alkali metal ion binding</a>                                           | <a href="#">RT</a>     |  |          |  |  | 8     | 1.0E0   | 1.0E0     |
|                          | Annotation Cluster 280 |                                                                                    | Enrichment Score: 0    |  | <b>G</b> |  |  | Count | P_Value | Benjamini |

| <input type="checkbox"/> | UP_SEQ_FEATURE         | domain:Fibronectin type-III 1                                                        | <a href="#">RT</a> |  |  |  | 4     | 9.8E-1  | 1.0E0     |
|--------------------------|------------------------|--------------------------------------------------------------------------------------|--------------------|--|--|--|-------|---------|-----------|
| <input type="checkbox"/> | UP_SEQ_FEATURE         | domain:Fibronectin type-III 2                                                        | <a href="#">RT</a> |  |  |  | 4     | 9.8E-1  | 1.0E0     |
| <input type="checkbox"/> | SMART                  | <a href="#">FN3</a>                                                                  | <a href="#">RT</a> |  |  |  | 7     | 9.9E-1  | 1.0E0     |
| <input type="checkbox"/> | INTERPRO               | <a href="#">Fibronectin, type III</a>                                                | <a href="#">RT</a> |  |  |  | 7     | 1.0E0   | 1.0E0     |
| <input type="checkbox"/> | INTERPRO               | <a href="#">Fibronectin, type III-like fold</a>                                      | <a href="#">RT</a> |  |  |  | 5     | 1.0E0   | 1.0E0     |
|                          | Annotation Cluster 281 | Enrichment Score: 0                                                                  | <b>G</b>           |  |  |  | Count | P_Value | Benjamini |
| <input type="checkbox"/> | SMART                  | <a href="#">IG</a>                                                                   | <a href="#">RT</a> |  |  |  | 13    | 9.6E-1  | 1.0E0     |
| <input type="checkbox"/> | INTERPRO               | <a href="#">Immunoglobulin subtype</a>                                               | <a href="#">RT</a> |  |  |  | 13    | 9.8E-1  | 1.0E0     |
| <input type="checkbox"/> | INTERPRO               | <a href="#">Immunoglobulin</a>                                                       | <a href="#">RT</a> |  |  |  | 6     | 1.0E0   | 1.0E0     |
| <input type="checkbox"/> | INTERPRO               | <a href="#">Immunoglobulin V-set</a>                                                 | <a href="#">RT</a> |  |  |  | 5     | 1.0E0   | 1.0E0     |
| <input type="checkbox"/> | INTERPRO               | <a href="#">Immunoglobulin-like</a>                                                  | <a href="#">RT</a> |  |  |  | 16    | 1.0E0   | 1.0E0     |
| <input type="checkbox"/> | INTERPRO               | <a href="#">Immunoglobulin-like fold</a>                                             | <a href="#">RT</a> |  |  |  | 16    | 1.0E0   | 1.0E0     |
| <input type="checkbox"/> | SP_PIR_KEYWORDS        | <a href="#">immunoglobulin domain</a>                                                | <a href="#">RT</a> |  |  |  | 11    | 1.0E0   | 1.0E0     |
|                          | Annotation Cluster 282 | Enrichment Score: 0                                                                  | <b>G</b>           |  |  |  | Count | P_Value | Benjamini |
| <input type="checkbox"/> | SP_PIR_KEYWORDS        | <a href="#">collagen</a>                                                             | <a href="#">RT</a> |  |  |  | 4     | 9.9E-1  | 1.0E0     |
| <input type="checkbox"/> | GOTERM_BP_ALL          | <a href="#">phosphate transport</a>                                                  | <a href="#">RT</a> |  |  |  | 4     | 9.9E-1  | 1.0E0     |
| <input type="checkbox"/> | INTERPRO               | <a href="#">Collagen triple helix repeat</a>                                         | <a href="#">RT</a> |  |  |  | 3     | 9.9E-1  | 1.0E0     |
| <input type="checkbox"/> | GOTERM_BP_ALL          | <a href="#">inorganic anion transport</a>                                            | <a href="#">RT</a> |  |  |  | 7     | 1.0E0   | 1.0E0     |
|                          | Annotation Cluster 283 | Enrichment Score: 0                                                                  | <b>G</b>           |  |  |  | Count | P_Value | Benjamini |
| <input type="checkbox"/> | GOTERM_BP_ALL          | <a href="#">spermatogenesis</a>                                                      | <a href="#">RT</a> |  |  |  | 11    | 9.9E-1  | 1.0E0     |
| <input type="checkbox"/> | GOTERM_BP_ALL          | <a href="#">male gamete generation</a>                                               | <a href="#">RT</a> |  |  |  | 11    | 9.9E-1  | 1.0E0     |
| <input type="checkbox"/> | GOTERM_BP_ALL          | <a href="#">reproduction</a>                                                         | <a href="#">RT</a> |  |  |  | 29    | 1.0E0   | 1.0E0     |
| <input type="checkbox"/> | GOTERM_BP_ALL          | <a href="#">gamete generation</a>                                                    | <a href="#">RT</a> |  |  |  | 14    | 1.0E0   | 1.0E0     |
| <input type="checkbox"/> | GOTERM_BP_ALL          | <a href="#">sexual reproduction</a>                                                  | <a href="#">RT</a> |  |  |  | 16    | 1.0E0   | 1.0E0     |
|                          | Annotation Cluster 284 | Enrichment Score: 0                                                                  | <b>G</b>           |  |  |  | Count | P_Value | Benjamini |
| <input type="checkbox"/> | SMART                  | <a href="#">PH</a>                                                                   | <a href="#">RT</a> |  |  |  | 10    | 9.9E-1  | 1.0E0     |
| <input type="checkbox"/> | UP_SEQ_FEATURE         | domain:PH                                                                            | <a href="#">RT</a> |  |  |  | 5     | 1.0E0   | 1.0E0     |
| <input type="checkbox"/> | INTERPRO               | <a href="#">Pleckstrin homology-type</a>                                             | <a href="#">RT</a> |  |  |  | 12    | 1.0E0   | 1.0E0     |
| <input type="checkbox"/> | INTERPRO               | <a href="#">Pleckstrin-like</a>                                                      | <a href="#">RT</a> |  |  |  | 10    | 1.0E0   | 1.0E0     |
|                          | Annotation Cluster 285 | Enrichment Score: 0                                                                  | <b>G</b>           |  |  |  | Count | P_Value | Benjamini |
| <input type="checkbox"/> | GOTERM_BP_ALL          | <a href="#">visual perception</a>                                                    | <a href="#">RT</a> |  |  |  | 5     | 9.9E-1  | 1.0E0     |
| <input type="checkbox"/> | GOTERM_BP_ALL          | <a href="#">sensory perception of light stimulus</a>                                 | <a href="#">RT</a> |  |  |  | 5     | 9.9E-1  | 1.0E0     |
| <input type="checkbox"/> | GOTERM_BP_ALL          | <a href="#">sensory perception</a>                                                   | <a href="#">RT</a> |  |  |  | 10    | 1.0E0   | 1.0E0     |
|                          | Annotation Cluster 286 | Enrichment Score: 0                                                                  | <b>G</b>           |  |  |  | Count | P_Value | Benjamini |
| <input type="checkbox"/> | GOTERM_BP_ALL          | <a href="#">transcription from RNA polymerase II promoter</a>                        | <a href="#">RT</a> |  |  |  | 32    | 9.9E-1  | 1.0E0     |
| <input type="checkbox"/> | GOTERM_BP_ALL          | <a href="#">positive regulation of transcription from RNA polymerase II promoter</a> | <a href="#">RT</a> |  |  |  | 12    | 1.0E0   | 1.0E0     |
| <input type="checkbox"/> | GOTERM_BP_ALL          | <a href="#">regulation of transcription from RNA polymerase II promoter</a>          | <a href="#">RT</a> |  |  |  | 26    | 1.0E0   | 1.0E0     |
|                          | Annotation Cluster 287 | Enrichment Score: 0                                                                  | <b>G</b>           |  |  |  | Count | P_Value | Benjamini |
| <input type="checkbox"/> | GOTERM_BP_ALL          | <a href="#">regulation of cytokine biosynthetic process</a>                          | <a href="#">RT</a> |  |  |  | 3     | 9.9E-1  | 1.0E0     |
| <input type="checkbox"/> | GOTERM_BP_ALL          | <a href="#">cytokine biosynthetic process</a>                                        | <a href="#">RT</a> |  |  |  | 3     | 1.0E0   | 1.0E0     |
| <input type="checkbox"/> | GOTERM_BP_ALL          | <a href="#">cytokine metabolic process</a>                                           | <a href="#">RT</a> |  |  |  | 3     | 1.0E0   | 1.0E0     |
| <input type="checkbox"/> | GOTERM_BP_ALL          | <a href="#">cytokine production</a>                                                  | <a href="#">RT</a> |  |  |  | 3     | 1.0E0   | 1.0E0     |
|                          | Annotation Cluster 288 | Enrichment Score: 0                                                                  | <b>G</b>           |  |  |  | Count | P_Value | Benjamini |
| <input type="checkbox"/> | GOTERM_BP_ALL          | <a href="#">cell-cell adhesion</a>                                                   | <a href="#">RT</a> |  |  |  | 16    | 9.8E-1  | 1.0E0     |
| <input type="checkbox"/> | SP_PIR_KEYWORDS        | <a href="#">cell adhesion</a>                                                        | <a href="#">RT</a> |  |  |  | 19    | 1.0E0   | 1.0E0     |
| <input type="checkbox"/> | GOTERM_BP_ALL          | <a href="#">biological adhesion</a>                                                  | <a href="#">RT</a> |  |  |  | 36    | 1.0E0   | 1.0E0     |
| <input type="checkbox"/> | GOTERM_BP_ALL          | <a href="#">cell adhesion</a>                                                        | <a href="#">RT</a> |  |  |  | 36    | 1.0E0   | 1.0E0     |
|                          | Annotation Cluster 289 | Enrichment Score: 0                                                                  | <b>G</b>           |  |  |  | Count | P_Value | Benjamini |
| <input type="checkbox"/> | GOTERM_BP_ALL          | <a href="#">forebrain development</a>                                                | <a href="#">RT</a> |  |  |  | 5     | 9.9E-1  | 1.0E0     |

| <input type="checkbox"/> |                        |                                                                 |    |  |  |  |  |       |         |           |
|--------------------------|------------------------|-----------------------------------------------------------------|----|--|--|--|--|-------|---------|-----------|
| <input type="checkbox"/> | GOTERM_BP_ALL          | <a href="#">brain development</a>                               | RT |  |  |  |  | 6     | 1.0E0   | 1.0E0     |
| <input type="checkbox"/> | GOTERM_BP_ALL          | <a href="#">central nervous system development</a>              | RT |  |  |  |  | 8     | 1.0E0   | 1.0E0     |
|                          | Annotation Cluster 290 | Enrichment Score: 0                                             | G  |  |  |  |  | Count | P_Value | Benjamini |
| <input type="checkbox"/> | GOTERM_MF_ALL          | <a href="#">nucleotide receptor activity, G-protein coupled</a> | RT |  |  |  |  | 3     | 9.8E-1  | 1.0E0     |
| <input type="checkbox"/> | GOTERM_MF_ALL          | <a href="#">nucleotide receptor activity</a>                    | RT |  |  |  |  | 3     | 9.9E-1  | 1.0E0     |
| <input type="checkbox"/> | GOTERM_MF_ALL          | <a href="#">peptide receptor activity</a>                       | RT |  |  |  |  | 3     | 1.0E0   | 1.0E0     |
| <input type="checkbox"/> | SP_PIR_KEYWORDS        | <a href="#">transducer</a>                                      | RT |  |  |  |  | 12    | 1.0E0   | 1.0E0     |
| <input type="checkbox"/> | INTERPRO               | <a href="#">Rhodopsin-like GPCR superfamily</a>                 | RT |  |  |  |  | 4     | 1.0E0   | 1.0E0     |
| <input type="checkbox"/> | KEGG_PATHWAY           | <a href="#">Neuroactive ligand-receptor interaction</a>         | RT |  |  |  |  | 6     | 1.0E0   | 1.0E0     |
| <input type="checkbox"/> | SP_PIR_KEYWORDS        | <a href="#">g-protein coupled receptor</a>                      | RT |  |  |  |  | 7     | 1.0E0   | 1.0E0     |
| <input type="checkbox"/> | GOTERM_MF_ALL          | <a href="#">rhodopsin-like receptor activity</a>                | RT |  |  |  |  | 7     | 1.0E0   | 1.0E0     |
| <input type="checkbox"/> | GOTERM_MF_ALL          | <a href="#">G-protein coupled receptor activity</a>             | RT |  |  |  |  | 7     | 1.0E0   | 1.0E0     |
| <input type="checkbox"/> | GOTERM_MF_ALL          | <a href="#">transmembrane receptor activity</a>                 | RT |  |  |  |  | 16    | 1.0E0   | 1.0E0     |
|                          | Annotation Cluster 291 | Enrichment Score: 0                                             | G  |  |  |  |  | Count | P_Value | Benjamini |
| <input type="checkbox"/> | GOTERM_BP_ALL          | <a href="#">cell differentiation</a>                            | RT |  |  |  |  | 149   | 9.9E-1  | 1.0E0     |
| <input type="checkbox"/> | GOTERM_BP_ALL          | <a href="#">cellular developmental process</a>                  | RT |  |  |  |  | 149   | 9.9E-1  | 1.0E0     |
| <input type="checkbox"/> | GOTERM_BP_ALL          | <a href="#">developmental process</a>                           | RT |  |  |  |  | 226   | 1.0E0   | 1.0E0     |
| <input type="checkbox"/> | GOTERM_BP_ALL          | <a href="#">organ development</a>                               | RT |  |  |  |  | 90    | 1.0E0   | 1.0E0     |
| <input type="checkbox"/> | GOTERM_BP_ALL          | <a href="#">anatomical structure morphogenesis</a>              | RT |  |  |  |  | 72    | 1.0E0   | 1.0E0     |
| <input type="checkbox"/> | GOTERM_BP_ALL          | <a href="#">system development</a>                              | RT |  |  |  |  | 115   | 1.0E0   | 1.0E0     |
| <input type="checkbox"/> | GOTERM_BP_ALL          | <a href="#">anatomical structure development</a>                | RT |  |  |  |  | 137   | 1.0E0   | 1.0E0     |
| <input type="checkbox"/> | GOTERM_BP_ALL          | <a href="#">multicellular organismal development</a>            | RT |  |  |  |  | 146   | 1.0E0   | 1.0E0     |
| <input type="checkbox"/> | GOTERM_BP_ALL          | <a href="#">multicellular organismal process</a>                | RT |  |  |  |  | 172   | 1.0E0   | 1.0E0     |
|                          | Annotation Cluster 292 | Enrichment Score: 0                                             | G  |  |  |  |  | Count | P_Value | Benjamini |
| <input type="checkbox"/> | GOTERM_BP_ALL          | <a href="#">intracellular signaling cascade</a>                 | RT |  |  |  |  | 91    | 9.9E-1  | 1.0E0     |
| <input type="checkbox"/> | GOTERM_BP_ALL          | <a href="#">signal transduction</a>                             | RT |  |  |  |  | 157   | 1.0E0   | 1.0E0     |
| <input type="checkbox"/> | GOTERM_BP_ALL          | <a href="#">cell communication</a>                              | RT |  |  |  |  | 163   | 1.0E0   | 1.0E0     |
|                          | Annotation Cluster 293 | Enrichment Score: 0                                             | G  |  |  |  |  | Count | P_Value | Benjamini |
| <input type="checkbox"/> | SP_PIR_KEYWORDS        | <a href="#">heme</a>                                            | RT |  |  |  |  | 5     | 1.0E0   | 1.0E0     |
| <input type="checkbox"/> | GOTERM_MF_ALL          | <a href="#">tetrapyrrole binding</a>                            | RT |  |  |  |  | 7     | 1.0E0   | 1.0E0     |
| <input type="checkbox"/> | GOTERM_MF_ALL          | <a href="#">heme binding</a>                                    | RT |  |  |  |  | 7     | 1.0E0   | 1.0E0     |
|                          | Annotation Cluster 294 | Enrichment Score: 0                                             | G  |  |  |  |  | Count | P_Value | Benjamini |
| <input type="checkbox"/> | GOTERM_CC_ALL          | <a href="#">apical junction complex</a>                         | RT |  |  |  |  | 3     | 1.0E0   | 1.0E0     |
| <input type="checkbox"/> | GOTERM_CC_ALL          | <a href="#">apicolateral plasma membrane</a>                    | RT |  |  |  |  | 3     | 1.0E0   | 1.0E0     |
| <input type="checkbox"/> | GOTERM_CC_ALL          | <a href="#">intercellular junction</a>                          | RT |  |  |  |  | 4     | 1.0E0   | 1.0E0     |
| <input type="checkbox"/> | SP_PIR_KEYWORDS        | <a href="#">cell junction</a>                                   | RT |  |  |  |  | 9     | 1.0E0   | 1.0E0     |
|                          | Annotation Cluster 295 | Enrichment Score: 0                                             | G  |  |  |  |  | Count | P_Value | Benjamini |
| <input type="checkbox"/> | GOTERM_BP_ALL          | <a href="#">generation of neurons</a>                           | RT |  |  |  |  | 19    | 1.0E0   | 1.0E0     |
| <input type="checkbox"/> | GOTERM_BP_ALL          | <a href="#">cellular morphogenesis during differentiation</a>   | RT |  |  |  |  | 9     | 1.0E0   | 1.0E0     |
| <input type="checkbox"/> | GOTERM_BP_ALL          | <a href="#">neurogenesis</a>                                    | RT |  |  |  |  | 20    | 1.0E0   | 1.0E0     |
| <input type="checkbox"/> | GOTERM_BP_ALL          | <a href="#">neuron differentiation</a>                          | RT |  |  |  |  | 15    | 1.0E0   | 1.0E0     |
| <input type="checkbox"/> | GOTERM_BP_ALL          | <a href="#">cell morphogenesis</a>                              | RT |  |  |  |  | 30    | 1.0E0   | 1.0E0     |
| <input type="checkbox"/> | GOTERM_BP_ALL          | <a href="#">cellular structure morphogenesis</a>                | RT |  |  |  |  | 30    | 1.0E0   | 1.0E0     |
| <input type="checkbox"/> | GOTERM_BP_ALL          | <a href="#">axonogenesis</a>                                    | RT |  |  |  |  | 6     | 1.0E0   | 1.0E0     |
| <input type="checkbox"/> | GOTERM_BP_ALL          | <a href="#">cell part morphogenesis</a>                         | RT |  |  |  |  | 13    | 1.0E0   | 1.0E0     |
| <input type="checkbox"/> | GOTERM_BP_ALL          | <a href="#">cell projection organization and biogenesis</a>     | RT |  |  |  |  | 13    | 1.0E0   | 1.0E0     |
| <input type="checkbox"/> | GOTERM_BP_ALL          | <a href="#">cell projection morphogenesis</a>                   | RT |  |  |  |  | 13    | 1.0E0   | 1.0E0     |
| <input type="checkbox"/> | GOTERM_BP_ALL          | <a href="#">neuron morphogenesis during differentiation</a>     | RT |  |  |  |  | 6     | 1.0E0   | 1.0E0     |
| <input type="checkbox"/> | GOTERM_BP_ALL          | <a href="#">neurite morphogenesis</a>                           | RT |  |  |  |  | 6     | 1.0E0   | 1.0E0     |

| <input type="checkbox"/> | GOTERM_BP_ALL          | <a href="#">neurite development</a>                           | <a href="#">RT</a> |  |  |  | 7     | 1.0E0   | 1.0E0     |
|--------------------------|------------------------|---------------------------------------------------------------|--------------------|--|--|--|-------|---------|-----------|
| <input type="checkbox"/> | GOTERM_BP_ALL          | <a href="#">nervous system development</a>                    | <a href="#">RT</a> |  |  |  | 37    | 1.0E0   | 1.0E0     |
| <input type="checkbox"/> | GOTERM_BP_ALL          | <a href="#">neuron development</a>                            | <a href="#">RT</a> |  |  |  | 8     | 1.0E0   | 1.0E0     |
|                          | Annotation Cluster 296 | Enrichment Score: 0                                           | <b>G</b>           |  |  |  | Count | P_Value | Benjamini |
| <input type="checkbox"/> | UP_SEQ_FEATURE         | zinc finger region:C2H2-type 2                                | <a href="#">RT</a> |  |  |  | 5     | 1.0E0   | 1.0E0     |
| <input type="checkbox"/> | UP_SEQ_FEATURE         | zinc finger region:C2H2-type 1                                | <a href="#">RT</a> |  |  |  | 5     | 1.0E0   | 1.0E0     |
| <input type="checkbox"/> | UP_SEQ_FEATURE         | zinc finger region:C2H2-type 3                                | <a href="#">RT</a> |  |  |  | 4     | 1.0E0   | 1.0E0     |
| <input type="checkbox"/> | INTERPRO               | <a href="#">Zinc finger, C2H2-type/integrase, DNA-binding</a> | <a href="#">RT</a> |  |  |  | 5     | 1.0E0   | 1.0E0     |
|                          | Annotation Cluster 297 | Enrichment Score: 0                                           | <b>G</b>           |  |  |  | Count | P_Value | Benjamini |
| <input type="checkbox"/> | GOTERM_CC_ALL          | <a href="#">postsynaptic membrane</a>                         | <a href="#">RT</a> |  |  |  | 3     | 1.0E0   | 1.0E0     |
| <input type="checkbox"/> | GOTERM_CC_ALL          | <a href="#">synapse part</a>                                  | <a href="#">RT</a> |  |  |  | 3     | 1.0E0   | 1.0E0     |
| <input type="checkbox"/> | GOTERM_CC_ALL          | <a href="#">synapse</a>                                       | <a href="#">RT</a> |  |  |  | 6     | 1.0E0   | 1.0E0     |
|                          | Annotation Cluster 298 | Enrichment Score: 0                                           | <b>G</b>           |  |  |  | Count | P_Value | Benjamini |
| <input type="checkbox"/> | GOTERM_CC_ALL          | <a href="#">integral to plasma membrane</a>                   | <a href="#">RT</a> |  |  |  | 32    | 1.0E0   | 1.0E0     |
| <input type="checkbox"/> | GOTERM_CC_ALL          | <a href="#">intrinsic to plasma membrane</a>                  | <a href="#">RT</a> |  |  |  | 32    | 1.0E0   | 1.0E0     |
| <input type="checkbox"/> | GOTERM_CC_ALL          | <a href="#">plasma membrane part</a>                          | <a href="#">RT</a> |  |  |  | 72    | 1.0E0   | 1.0E0     |
|                          | Annotation Cluster 299 | Enrichment Score: 0                                           | <b>G</b>           |  |  |  | Count | P_Value | Benjamini |
| <input type="checkbox"/> | SP_PIR_KEYWORDS        | <a href="#">synapse</a>                                       | <a href="#">RT</a> |  |  |  | 4     | 1.0E0   | 1.0E0     |
| <input type="checkbox"/> | SP_PIR_KEYWORDS        | <a href="#">cell junction</a>                                 | <a href="#">RT</a> |  |  |  | 9     | 1.0E0   | 1.0E0     |
| <input type="checkbox"/> | GOTERM_CC_ALL          | <a href="#">synapse</a>                                       | <a href="#">RT</a> |  |  |  | 6     | 1.0E0   | 1.0E0     |
|                          | Annotation Cluster 300 | Enrichment Score: 0                                           | <b>G</b>           |  |  |  | Count | P_Value | Benjamini |
| <input type="checkbox"/> | SMART                  | <a href="#">ZnF_C2H2</a>                                      | <a href="#">RT</a> |  |  |  | 10    | 1.0E0   | 1.0E0     |
| <input type="checkbox"/> | INTERPRO               | <a href="#">Zinc finger, C2H2-like</a>                        | <a href="#">RT</a> |  |  |  | 10    | 1.0E0   | 1.0E0     |
| <input type="checkbox"/> | INTERPRO               | <a href="#">Zinc finger, C2H2-type/integrase, DNA-binding</a> | <a href="#">RT</a> |  |  |  | 5     | 1.0E0   | 1.0E0     |
| <input type="checkbox"/> | INTERPRO               | <a href="#">Zinc finger, C2H2-type</a>                        | <a href="#">RT</a> |  |  |  | 10    | 1.0E0   | 1.0E0     |
|                          | Annotation Cluster 301 | Enrichment Score: 0                                           | <b>G</b>           |  |  |  | Count | P_Value | Benjamini |
| <input type="checkbox"/> | SP_PIR_KEYWORDS        | <a href="#">metal-binding</a>                                 | <a href="#">RT</a> |  |  |  | 147   | 1.0E0   | 1.0E0     |
| <input type="checkbox"/> | GOTERM_MF_ALL          | <a href="#">transition metal ion binding</a>                  | <a href="#">RT</a> |  |  |  | 154   | 1.0E0   | 1.0E0     |
| <input type="checkbox"/> | SP_PIR_KEYWORDS        | <a href="#">zinc</a>                                          | <a href="#">RT</a> |  |  |  | 90    | 1.0E0   | 1.0E0     |
| <input type="checkbox"/> | GOTERM_MF_ALL          | <a href="#">metal ion binding</a>                             | <a href="#">RT</a> |  |  |  | 250   | 1.0E0   | 1.0E0     |
| <input type="checkbox"/> | GOTERM_MF_ALL          | <a href="#">ion binding</a>                                   | <a href="#">RT</a> |  |  |  | 254   | 1.0E0   | 1.0E0     |
| <input type="checkbox"/> | GOTERM_MF_ALL          | <a href="#">zinc ion binding</a>                              | <a href="#">RT</a> |  |  |  | 110   | 1.0E0   | 1.0E0     |
| <input type="checkbox"/> | SP_PIR_KEYWORDS        | <a href="#">zinc-finger</a>                                   | <a href="#">RT</a> |  |  |  | 60    | 1.0E0   | 1.0E0     |
| <input type="checkbox"/> | GOTERM_MF_ALL          | <a href="#">cation binding</a>                                | <a href="#">RT</a> |  |  |  | 209   | 1.0E0   | 1.0E0     |
|                          | Annotation Cluster 302 | Enrichment Score: 0                                           | <b>G</b>           |  |  |  | Count | P_Value | Benjamini |
| <input type="checkbox"/> | UP_SEQ_FEATURE         | transmembrane region                                          | <a href="#">RT</a> |  |  |  | 169   | 1.0E0   | 1.0E0     |
| <input type="checkbox"/> | GOTERM_CC_ALL          | <a href="#">membrane part</a>                                 | <a href="#">RT</a> |  |  |  | 349   | 1.0E0   | 1.0E0     |
| <input type="checkbox"/> | GOTERM_CC_ALL          | <a href="#">integral to membrane</a>                          | <a href="#">RT</a> |  |  |  | 299   | 1.0E0   | 1.0E0     |
| <input type="checkbox"/> | GOTERM_CC_ALL          | <a href="#">intrinsic to membrane</a>                         | <a href="#">RT</a> |  |  |  | 299   | 1.0E0   | 1.0E0     |
| <input type="checkbox"/> | SP_PIR_KEYWORDS        | <a href="#">transmembrane</a>                                 | <a href="#">RT</a> |  |  |  | 228   | 1.0E0   | 1.0E0     |
| <input type="checkbox"/> | GOTERM_CC_ALL          | <a href="#">membrane</a>                                      | <a href="#">RT</a> |  |  |  | 446   | 1.0E0   | 1.0E0     |
| <input type="checkbox"/> | SP_PIR_KEYWORDS        | <a href="#">membrane</a>                                      | <a href="#">RT</a> |  |  |  | 302   | 1.0E0   | 1.0E0     |
|                          | Annotation Cluster 303 | Enrichment Score: 0                                           | <b>G</b>           |  |  |  | Count | P_Value | Benjamini |
| <input type="checkbox"/> | UP_SEQ_FEATURE         | transmembrane region                                          | <a href="#">RT</a> |  |  |  | 169   | 1.0E0   | 1.0E0     |
| <input type="checkbox"/> | GOTERM_CC_ALL          | <a href="#">extracellular space</a>                           | <a href="#">RT</a> |  |  |  | 119   | 1.0E0   | 1.0E0     |
| <input type="checkbox"/> | GOTERM_CC_ALL          | <a href="#">extracellular region part</a>                     | <a href="#">RT</a> |  |  |  | 122   | 1.0E0   | 1.0E0     |
| <input type="checkbox"/> | UP_SEQ_FEATURE         | topological domain:Cytoplasmic                                | <a href="#">RT</a> |  |  |  | 103   | 1.0E0   | 1.0E0     |
| <input type="checkbox"/> | UP_SEQ_FEATURE         | topological domain:Extracellular                              | <a href="#">RT</a> |  |  |  | 70    | 1.0E0   | 1.0E0     |
| <input type="checkbox"/> | UP_SEQ_FEATURE         | disulfide bond                                                | <a href="#">RT</a> |  |  |  | 89    | 1.0E0   | 1.0E0     |

|                          |                 |                                               |                    |  | Count | P_Value | Benjamini |
|--------------------------|-----------------|-----------------------------------------------|--------------------|--|-------|---------|-----------|
| <input type="checkbox"/> | GOTERM_CC_ALL   | <a href="#">extracellular region</a>          | <a href="#">RT</a> |  | 124   | 1.0E0   | 1.0E0     |
| <input type="checkbox"/> | UP_SEQ_FEATURE  | glycosylation site:N-linked (GlcNAc...)       | <a href="#">RT</a> |  | 123   | 1.0E0   | 1.0E0     |
| <input type="checkbox"/> | SP_PIR_KEYWORDS | <a href="#">signal</a>                        | <a href="#">RT</a> |  | 119   | 1.0E0   | 1.0E0     |
| <input type="checkbox"/> | SP_PIR_KEYWORDS | <a href="#">glycoprotein</a>                  | <a href="#">RT</a> |  | 159   | 1.0E0   | 1.0E0     |
| <input type="checkbox"/> | UP_SEQ_FEATURE  | signal peptide                                | <a href="#">RT</a> |  | 99    | 1.0E0   | 1.0E0     |
| Annotation Cluster 304   |                 | Enrichment Score: 0                           | <b>G</b>           |  |       |         |           |
| <input type="checkbox"/> | SP_PIR_KEYWORDS | <a href="#">receptor</a>                      | <a href="#">RT</a> |  | 57    | 1.0E0   | 1.0E0     |
| <input type="checkbox"/> | GOTERM_MF_ALL   | <a href="#">signal transducer activity</a>    | <a href="#">RT</a> |  | 93    | 1.0E0   | 1.0E0     |
| <input type="checkbox"/> | GOTERM_MF_ALL   | <a href="#">molecular transducer activity</a> | <a href="#">RT</a> |  | 93    | 1.0E0   | 1.0E0     |
| <input type="checkbox"/> | GOTERM_MF_ALL   | <a href="#">receptor activity</a>             | <a href="#">RT</a> |  | 70    | 1.0E0   | 1.0E0     |

647 terms were not clustered.

Please cite the web site or [Genome Biology 2003; 4\(5\):P3](#) within any publication that makes use of any methods inspired by DAVID.

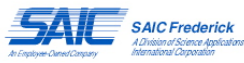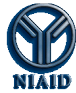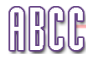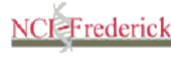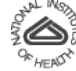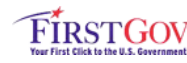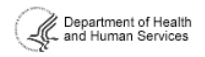

[Term of Service](#) | [Contact Us](#) | [Site Map](#)

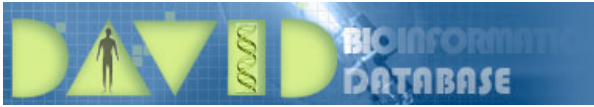

## Functional Annotation Clustering Of Genes Upregulated >2 in WASP Deficient BMMCs

[Help and Manual](#)

Current Gene List: **wsp up >2**  
1645 DAVID IDs

Options Classification Stringency **Medium**

Rerun using options

Create Sublist

[Download File](#)

| Annotation Cluster 1     |                 | Enrichment Score: 48.89                                      | <b>G</b>  |  | Count | P_Value | Benjamini |
|--------------------------|-----------------|--------------------------------------------------------------|-----------|--|-------|---------|-----------|
| <input type="checkbox"/> | GOTERM_CC_ALL   | <a href="#">intracellular part</a>                           | <b>RT</b> |  | 1024  | 4.2E-74 | 3.3E-71   |
| <input type="checkbox"/> | GOTERM_CC_ALL   | <a href="#">intracellular</a>                                | <b>RT</b> |  | 1048  | 9.4E-70 | 3.6E-67   |
| <input type="checkbox"/> | GOTERM_CC_ALL   | <a href="#">intracellular membrane-bound organelle</a>       | <b>RT</b> |  | 839   | 3.6E-65 | 9.3E-63   |
| <input type="checkbox"/> | GOTERM_CC_ALL   | <a href="#">membrane-bound organelle</a>                     | <b>RT</b> |  | 839   | 6.8E-65 | 1.3E-62   |
| <input type="checkbox"/> | GOTERM_CC_ALL   | <a href="#">intracellular organelle</a>                      | <b>RT</b> |  | 896   | 3.5E-61 | 5.4E-59   |
| <input type="checkbox"/> | GOTERM_CC_ALL   | <a href="#">organelle</a>                                    | <b>RT</b> |  | 896   | 5.8E-61 | 7.5E-59   |
| <input type="checkbox"/> | GOTERM_CC_ALL   | <a href="#">nucleus</a>                                      | <b>RT</b> |  | 601   | 5.2E-55 | 5.7E-53   |
| <input type="checkbox"/> | SP_PIR_KEYWORDS | <a href="#">nucleus</a>                                      | <b>RT</b> |  | 491   | 2.7E-43 | 2.3E-40   |
| <input type="checkbox"/> | GOTERM_CC_ALL   | <a href="#">cytoplasm</a>                                    | <b>RT</b> |  | 627   | 5.0E-18 | 2.3E-16   |
| <input type="checkbox"/> | GOTERM_CC_ALL   | <a href="#">cell part</a>                                    | <b>RT</b> |  | 1160  | 1.1E-16 | 4.3E-15   |
| <input type="checkbox"/> | GOTERM_CC_ALL   | <a href="#">cell</a>                                         | <b>RT</b> |  | 1160  | 1.1E-16 | 4.3E-15   |
| Annotation Cluster 2     |                 | Enrichment Score: 27.48                                      | <b>G</b>  |  | Count | P_Value | Benjamini |
| <input type="checkbox"/> | GOTERM_CC_ALL   | <a href="#">intracellular organelle part</a>                 | <b>RT</b> |  | 387   | 2.4E-34 | 2.4E-32   |
| <input type="checkbox"/> | GOTERM_CC_ALL   | <a href="#">organelle part</a>                               | <b>RT</b> |  | 387   | 6.7E-34 | 5.8E-32   |
| <input type="checkbox"/> | GOTERM_CC_ALL   | <a href="#">macromolecular complex</a>                       | <b>RT</b> |  | 322   | 4.0E-26 | 2.6E-24   |
| <input type="checkbox"/> | GOTERM_CC_ALL   | <a href="#">non-membrane-bound organelle</a>                 | <b>RT</b> |  | 249   | 3.5E-25 | 2.1E-23   |
| <input type="checkbox"/> | GOTERM_CC_ALL   | <a href="#">intracellular non-membrane-bound organelle</a>   | <b>RT</b> |  | 249   | 3.5E-25 | 2.1E-23   |
| <input type="checkbox"/> | GOTERM_CC_ALL   | <a href="#">nuclear part</a>                                 | <b>RT</b> |  | 198   | 1.7E-24 | 8.6E-23   |
| Annotation Cluster 3     |                 | Enrichment Score: 21.18                                      | <b>G</b>  |  | Count | P_Value | Benjamini |
| <input type="checkbox"/> | GOTERM_BP_ALL   | <a href="#">cell cycle</a>                                   | <b>RT</b> |  | 165   | 3.4E-29 | 5.8E-26   |
| <input type="checkbox"/> | SP_PIR_KEYWORDS | <a href="#">cell cycle</a>                                   | <b>RT</b> |  | 106   | 9.7E-28 | 2.8E-25   |
| <input type="checkbox"/> | GOTERM_BP_ALL   | <a href="#">cell cycle phase</a>                             | <b>RT</b> |  | 92    | 6.3E-27 | 6.5E-24   |
| <input type="checkbox"/> | GOTERM_BP_ALL   | <a href="#">mitotic cell cycle</a>                           | <b>RT</b> |  | 81    | 7.7E-25 | 4.4E-22   |
| <input type="checkbox"/> | SP_PIR_KEYWORDS | <a href="#">mitosis</a>                                      | <b>RT</b> |  | 55    | 9.1E-25 | 1.6E-22   |
| <input type="checkbox"/> | GOTERM_BP_ALL   | <a href="#">M phase</a>                                      | <b>RT</b> |  | 80    | 1.6E-24 | 8.2E-22   |
| <input type="checkbox"/> | GOTERM_BP_ALL   | <a href="#">cell cycle process</a>                           | <b>RT</b> |  | 132   | 3.7E-23 | 1.7E-20   |
| <input type="checkbox"/> | GOTERM_BP_ALL   | <a href="#">cell division</a>                                | <b>RT</b> |  | 78    | 3.8E-23 | 1.6E-20   |
| <input type="checkbox"/> | SP_PIR_KEYWORDS | <a href="#">cell division</a>                                | <b>RT</b> |  | 67    | 1.1E-22 | 1.6E-20   |
| <input type="checkbox"/> | GOTERM_BP_ALL   | <a href="#">M phase of mitotic cell cycle</a>                | <b>RT</b> |  | 66    | 1.4E-22 | 5.4E-20   |
| <input type="checkbox"/> | GOTERM_BP_ALL   | <a href="#">mitosis</a>                                      | <b>RT</b> |  | 65    | 5.4E-22 | 1.9E-19   |
| <input type="checkbox"/> | GOTERM_BP_ALL   | <a href="#">regulation of progression through cell cycle</a> | <b>RT</b> |  | 64    | 1.1E-6  | 9.7E-5    |
| <input type="checkbox"/> | GOTERM_BP_ALL   | <a href="#">regulation of cell cycle</a>                     | <b>RT</b> |  | 64    | 1.5E-6  | 1.2E-4    |
| Annotation Cluster 4     |                 | Enrichment Score: 21.09                                      | <b>G</b>  |  | Count | P_Value | Benjamini |
| <input type="checkbox"/> | GOTERM_CC_ALL   | <a href="#">chromosome</a>                                   | <b>RT</b> |  | 95    | 3.2E-26 | 2.3E-24   |
| <input type="checkbox"/> | GOTERM_CC_ALL   | <a href="#">chromosomal part</a>                             | <b>RT</b> |  | 82    | 2.1E-22 | 9.9E-21   |
| <input type="checkbox"/> | GOTERM_CC_ALL   | <a href="#">chromosome, pericentric region</a>               | <b>RT</b> |  | 33    | 8.3E-17 | 4.6E-15   |
| Annotation Cluster 5     |                 | Enrichment Score: 16.18                                      | <b>G</b>  |  | Count | P_Value | Benjamini |
| <input type="checkbox"/> | GOTERM_BP_ALL   | <a href="#">cellular metabolic process</a>                   | <b>RT</b> |  | 784   | 2.4E-25 | 2.1E-22   |



|                          |                 |                                                                                       |                    |  | Count | P_Value | Benjamini |
|--------------------------|-----------------|---------------------------------------------------------------------------------------|--------------------|--|-------|---------|-----------|
| <input type="checkbox"/> | GOTERM_BP_ALL   | <a href="#">nucleobase, nucleoside, nucleotide and nucleic acid metabolic process</a> | <a href="#">RT</a> |  | 452   | 6.9E-25 | 4.4E-22   |
| <input type="checkbox"/> | GOTERM_BP_ALL   | <a href="#">primary metabolic process</a>                                             | <a href="#">RT</a> |  | 774   | 2.1E-22 | 7.7E-20   |
| <input type="checkbox"/> | GOTERM_BP_ALL   | <a href="#">metabolic process</a>                                                     | <a href="#">RT</a> |  | 830   | 2.2E-20 | 7.1E-18   |
| <input type="checkbox"/> | GOTERM_BP_ALL   | <a href="#">cellular process</a>                                                      | <a href="#">RT</a> |  | 1036  | 3.7E-13 | 6.8E-11   |
| <input type="checkbox"/> | GOTERM_BP_ALL   | <a href="#">macromolecule metabolic process</a>                                       | <a href="#">RT</a> |  | 655   | 1.5E-12 | 2.5E-10   |
| <input type="checkbox"/> | GOTERM_BP_ALL   | <a href="#">gene expression</a>                                                       | <a href="#">RT</a> |  | 356   | 2.1E-8  | 2.3E-6    |
| <input type="checkbox"/> | GOTERM_BP_ALL   | <a href="#">biopolymer metabolic process</a>                                          | <a href="#">RT</a> |  | 494   | 3.9E-8  | 4.2E-6    |
| Annotation Cluster 6     |                 | Enrichment Score: 15.06                                                               | <b>G</b>           |  | Count | P_Value | Benjamini |
| <input type="checkbox"/> | GOTERM_BP_ALL   | <a href="#">ribonucleoprotein complex biogenesis and assembly</a>                     | <a href="#">RT</a> |  | 73    | 6.4E-25 | 4.7E-22   |
| <input type="checkbox"/> | GOTERM_BP_ALL   | <a href="#">ribosome biogenesis and assembly</a>                                      | <a href="#">RT</a> |  | 49    | 4.5E-19 | 1.4E-16   |
| <input type="checkbox"/> | GOTERM_BP_ALL   | <a href="#">rRNA processing</a>                                                       | <a href="#">RT</a> |  | 27    | 1.5E-12 | 2.4E-10   |
| <input type="checkbox"/> | GOTERM_BP_ALL   | <a href="#">rRNA metabolic process</a>                                                | <a href="#">RT</a> |  | 27    | 2.4E-12 | 3.8E-10   |
| <input type="checkbox"/> | SP_PIR_KEYWORDS | <a href="#">rrna_processing</a>                                                       | <a href="#">RT</a> |  | 21    | 4.9E-10 | 2.0E-8    |
| Annotation Cluster 7     |                 | Enrichment Score: 14.71                                                               | <b>G</b>           |  | Count | P_Value | Benjamini |
| <input type="checkbox"/> | GOTERM_MF_ALL   | <a href="#">nucleotide binding</a>                                                    | <a href="#">RT</a> |  | 298   | 9.8E-23 | 1.3E-19   |
| <input type="checkbox"/> | SP_PIR_KEYWORDS | <a href="#">atp-binding</a>                                                           | <a href="#">RT</a> |  | 177   | 2.7E-17 | 2.9E-15   |
| <input type="checkbox"/> | GOTERM_MF_ALL   | <a href="#">adenyl ribonucleotide binding</a>                                         | <a href="#">RT</a> |  | 210   | 2.0E-16 | 1.5E-13   |
| <input type="checkbox"/> | GOTERM_MF_ALL   | <a href="#">ATP binding</a>                                                           | <a href="#">RT</a> |  | 208   | 2.1E-16 | 1.2E-13   |
| <input type="checkbox"/> | GOTERM_MF_ALL   | <a href="#">adenyl nucleotide binding</a>                                             | <a href="#">RT</a> |  | 216   | 4.8E-16 | 2.0E-13   |
| <input type="checkbox"/> | GOTERM_MF_ALL   | <a href="#">purine ribonucleotide binding</a>                                         | <a href="#">RT</a> |  | 240   | 3.0E-15 | 1.0E-12   |
| <input type="checkbox"/> | GOTERM_MF_ALL   | <a href="#">ribonucleotide binding</a>                                                | <a href="#">RT</a> |  | 240   | 3.0E-15 | 1.0E-12   |
| <input type="checkbox"/> | SP_PIR_KEYWORDS | <a href="#">nucleotide-binding</a>                                                    | <a href="#">RT</a> |  | 205   | 5.4E-15 | 4.6E-13   |
| <input type="checkbox"/> | GOTERM_MF_ALL   | <a href="#">purine nucleotide binding</a>                                             | <a href="#">RT</a> |  | 246   | 6.6E-15 | 2.0E-12   |
| <input type="checkbox"/> | UP_SEQ_FEATURE  | nucleotide phosphate-binding region:ATP                                               | <a href="#">RT</a> |  | 89    | 5.0E-5  | 6.9E-2    |
| Annotation Cluster 8     |                 | Enrichment Score: 14.49                                                               | <b>G</b>           |  | Count | P_Value | Benjamini |
| <input type="checkbox"/> | GOTERM_BP_ALL   | <a href="#">RNA processing</a>                                                        | <a href="#">RT</a> |  | 115   | 1.0E-31 | 5.3E-28   |
| <input type="checkbox"/> | GOTERM_BP_ALL   | <a href="#">RNA splicing</a>                                                          | <a href="#">RT</a> |  | 54    | 2.1E-14 | 4.9E-12   |
| <input type="checkbox"/> | SP_PIR_KEYWORDS | <a href="#">mrna_splicing</a>                                                         | <a href="#">RT</a> |  | 48    | 3.1E-14 | 2.2E-12   |
| <input type="checkbox"/> | SP_PIR_KEYWORDS | <a href="#">mrna_processing</a>                                                       | <a href="#">RT</a> |  | 55    | 4.8E-14 | 3.2E-12   |
| <input type="checkbox"/> | GOTERM_BP_ALL   | <a href="#">mRNA metabolic process</a>                                                | <a href="#">RT</a> |  | 66    | 1.1E-13 | 2.3E-11   |
| <input type="checkbox"/> | GOTERM_BP_ALL   | <a href="#">mRNA processing</a>                                                       | <a href="#">RT</a> |  | 60    | 3.2E-13 | 6.3E-11   |
| <input type="checkbox"/> | GOTERM_CC_ALL   | <a href="#">spliceosome</a>                                                           | <a href="#">RT</a> |  | 38    | 1.4E-10 | 3.4E-9    |
| <input type="checkbox"/> | SP_PIR_KEYWORDS | <a href="#">spliceosome</a>                                                           | <a href="#">RT</a> |  | 32    | 7.5E-10 | 3.0E-8    |
| Annotation Cluster 9     |                 | Enrichment Score: 12.28                                                               | <b>G</b>           |  | Count | P_Value | Benjamini |
| <input type="checkbox"/> | GOTERM_BP_ALL   | <a href="#">DNA metabolic process</a>                                                 | <a href="#">RT</a> |  | 146   | 2.0E-27 | 2.5E-24   |
| <input type="checkbox"/> | GOTERM_BP_ALL   | <a href="#">DNA repair</a>                                                            | <a href="#">RT</a> |  | 61    | 4.4E-17 | 1.1E-14   |
| <input type="checkbox"/> | GOTERM_BP_ALL   | <a href="#">response to DNA damage stimulus</a>                                       | <a href="#">RT</a> |  | 67    | 1.6E-15 | 3.8E-13   |
| <input type="checkbox"/> | SP_PIR_KEYWORDS | <a href="#">DNA damage</a>                                                            | <a href="#">RT</a> |  | 45    | 1.1E-13 | 6.8E-12   |
| <input type="checkbox"/> | GOTERM_BP_ALL   | <a href="#">response to endogenous stimulus</a>                                       | <a href="#">RT</a> |  | 68    | 3.2E-13 | 6.2E-11   |
| <input type="checkbox"/> | SP_PIR_KEYWORDS | <a href="#">DNA repair</a>                                                            | <a href="#">RT</a> |  | 41    | 1.8E-12 | 9.9E-11   |
| <input type="checkbox"/> | GOTERM_BP_ALL   | <a href="#">response to stress</a>                                                    | <a href="#">RT</a> |  | 104   | 6.7E-4  | 2.7E-2    |
| <input type="checkbox"/> | GOTERM_BP_ALL   | <a href="#">response to stimulus</a>                                                  | <a href="#">RT</a> |  | 135   | 1.0E0   | 1.0E0     |
| Annotation Cluster 10    |                 | Enrichment Score: 10.92                                                               | <b>G</b>           |  | Count | P_Value | Benjamini |
| <input type="checkbox"/> | GOTERM_BP_ALL   | <a href="#">tRNA metabolic process</a>                                                | <a href="#">RT</a> |  | 44    | 2.2E-17 | 6.2E-15   |
| <input type="checkbox"/> | GOTERM_BP_ALL   | <a href="#">tRNA processing</a>                                                       | <a href="#">RT</a> |  | 23    | 7.7E-10 | 9.3E-8    |
| <input type="checkbox"/> | SP_PIR_KEYWORDS | <a href="#">trna_processing</a>                                                       | <a href="#">RT</a> |  | 17    | 1.1E-7  | 2.9E-6    |
| Annotation Cluster 11    |                 | Enrichment Score: 10.68                                                               | <b>G</b>           |  | Count | P_Value | Benjamini |
| <input type="checkbox"/> | GOTERM_BP_ALL   | <a href="#">biosynthetic process</a>                                                  | <a href="#">RT</a> |  | 204   | 2.7E-17 | 7.4E-15   |
| <input type="checkbox"/> | GOTERM_BP_ALL   | <a href="#">cellular biosynthetic process</a>                                         | <a href="#">RT</a> |  | 157   | 2.2E-14 | 5.0E-12   |

| <input type="checkbox"/> | Category        | Term                                                                                               | RT                 | Bar | Count                  | P_Value  | Benjamini |
|--------------------------|-----------------|----------------------------------------------------------------------------------------------------|--------------------|-----|------------------------|----------|-----------|
| <input type="checkbox"/> | GOTERM_BP_ALL   | <a href="#">translation</a>                                                                        | <a href="#">RT</a> |     | 81                     | 7.4E-9   | 8.3E-7    |
| <input type="checkbox"/> | GOTERM_BP_ALL   | <a href="#">macromolecule biosynthetic process</a>                                                 | <a href="#">RT</a> |     | 96                     | 4.4E-5   | 2.6E-3    |
| Annotation Cluster 12    |                 |                                                                                                    |                    |     | Enrichment Score: 9.58 | <b>G</b> |           |
| <input type="checkbox"/> | SMART           | <a href="#">RRM</a>                                                                                | <a href="#">RT</a> |     | 45                     | 3.5E-14  | 2.1E-11   |
| <input type="checkbox"/> | INTERPRO        | <a href="#">RNA recognition motif, RNP-1</a>                                                       | <a href="#">RT</a> |     | 40                     | 1.4E-9   | 8.3E-6    |
| <input type="checkbox"/> | INTERPRO        | <a href="#">Nucleotide-binding, alpha-beta plait</a>                                               | <a href="#">RT</a> |     | 39                     | 4.2E-9   | 1.2E-5    |
| <input type="checkbox"/> | UP_SEQ_FEATURE  | domain:RRM                                                                                         | <a href="#">RT</a> |     | 21                     | 2.2E-8   | 3.1E-4    |
| Annotation Cluster 13    |                 |                                                                                                    |                    |     | Enrichment Score: 8.53 | <b>G</b> |           |
| <input type="checkbox"/> | SP_PIR_KEYWORDS | <a href="#">chaperone</a>                                                                          | <a href="#">RT</a> |     | 37                     | 6.7E-11  | 2.9E-9    |
| <input type="checkbox"/> | GOTERM_BP_ALL   | <a href="#">protein folding</a>                                                                    | <a href="#">RT</a> |     | 51                     | 1.6E-10  | 2.3E-8    |
| <input type="checkbox"/> | GOTERM_MF_ALL   | <a href="#">unfolded protein binding</a>                                                           | <a href="#">RT</a> |     | 22                     | 2.3E-6   | 2.2E-4    |
| Annotation Cluster 14    |                 |                                                                                                    |                    |     | Enrichment Score: 8.33 | <b>G</b> |           |
| <input type="checkbox"/> | GOTERM_CC_ALL   | <a href="#">mitochondrion</a>                                                                      | <a href="#">RT</a> |     | 150                    | 7.1E-14  | 2.5E-12   |
| <input type="checkbox"/> | SP_PIR_KEYWORDS | <a href="#">Mitochondrion</a>                                                                      | <a href="#">RT</a> |     | 109                    | 2.2E-11  | 9.9E-10   |
| <input type="checkbox"/> | GOTERM_CC_ALL   | <a href="#">mitochondrial part</a>                                                                 | <a href="#">RT</a> |     | 61                     | 3.8E-7   | 7.3E-6    |
| <input type="checkbox"/> | SP_PIR_KEYWORDS | <a href="#">transit peptide</a>                                                                    | <a href="#">RT</a> |     | 54                     | 8.4E-4   | 1.3E-2    |
| Annotation Cluster 15    |                 |                                                                                                    |                    |     | Enrichment Score: 8.11 | <b>G</b> |           |
| <input type="checkbox"/> | GOTERM_MF_ALL   | <a href="#">nucleoside-triphosphatase activity</a>                                                 | <a href="#">RT</a> |     | 94                     | 4.6E-11  | 1.1E-8    |
| <input type="checkbox"/> | GOTERM_MF_ALL   | <a href="#">pyrophosphatase activity</a>                                                           | <a href="#">RT</a> |     | 97                     | 4.8E-11  | 1.1E-8    |
| <input type="checkbox"/> | GOTERM_MF_ALL   | <a href="#">hydrolase activity, acting on acid anhydrides, in phosphorus-containing anhydrides</a> | <a href="#">RT</a> |     | 97                     | 8.0E-11  | 1.6E-8    |
| <input type="checkbox"/> | GOTERM_MF_ALL   | <a href="#">hydrolase activity, acting on acid anhydrides</a>                                      | <a href="#">RT</a> |     | 97                     | 1.1E-10  | 2.1E-8    |
| <input type="checkbox"/> | GOTERM_MF_ALL   | <a href="#">ATPase activity, coupled</a>                                                           | <a href="#">RT</a> |     | 50                     | 1.3E-6   | 1.5E-4    |
| <input type="checkbox"/> | GOTERM_MF_ALL   | <a href="#">ATPase activity</a>                                                                    | <a href="#">RT</a> |     | 55                     | 2.3E-6   | 2.2E-4    |
| <input type="checkbox"/> | GOTERM_MF_ALL   | <a href="#">hydrolase activity</a>                                                                 | <a href="#">RT</a> |     | 241                    | 2.9E-5   | 2.3E-3    |
| Annotation Cluster 16    |                 |                                                                                                    |                    |     | Enrichment Score: 7.89 | <b>G</b> |           |
| <input type="checkbox"/> | GOTERM_CC_ALL   | <a href="#">nuclear membrane part</a>                                                              | <a href="#">RT</a> |     | 28                     | 2.5E-12  | 8.2E-11   |
| <input type="checkbox"/> | GOTERM_CC_ALL   | <a href="#">nuclear pore</a>                                                                       | <a href="#">RT</a> |     | 25                     | 4.7E-12  | 1.5E-10   |
| <input type="checkbox"/> | GOTERM_CC_ALL   | <a href="#">nuclear membrane</a>                                                                   | <a href="#">RT</a> |     | 28                     | 8.6E-12  | 2.5E-10   |
| <input type="checkbox"/> | SP_PIR_KEYWORDS | <a href="#">mrna transport</a>                                                                     | <a href="#">RT</a> |     | 22                     | 1.1E-11  | 5.1E-10   |
| <input type="checkbox"/> | GOTERM_BP_ALL   | <a href="#">mRNA transport</a>                                                                     | <a href="#">RT</a> |     | 25                     | 2.3E-11  | 3.4E-9    |
| <input type="checkbox"/> | GOTERM_CC_ALL   | <a href="#">pore complex</a>                                                                       | <a href="#">RT</a> |     | 25                     | 7.2E-11  | 2.0E-9    |
| <input type="checkbox"/> | GOTERM_BP_ALL   | <a href="#">nucleobase, nucleoside, nucleotide and nucleic acid transport</a>                      | <a href="#">RT</a> |     | 26                     | 1.5E-10  | 2.1E-8    |
| <input type="checkbox"/> | GOTERM_BP_ALL   | <a href="#">RNA transport</a>                                                                      | <a href="#">RT</a> |     | 25                     | 2.0E-10  | 2.6E-8    |
| <input type="checkbox"/> | GOTERM_BP_ALL   | <a href="#">nucleic acid transport</a>                                                             | <a href="#">RT</a> |     | 25                     | 2.0E-10  | 2.6E-8    |
| <input type="checkbox"/> | GOTERM_BP_ALL   | <a href="#">establishment of RNA localization</a>                                                  | <a href="#">RT</a> |     | 25                     | 2.0E-10  | 2.6E-8    |
| <input type="checkbox"/> | GOTERM_BP_ALL   | <a href="#">RNA localization</a>                                                                   | <a href="#">RT</a> |     | 25                     | 2.9E-10  | 3.7E-8    |
| <input type="checkbox"/> | GOTERM_BP_ALL   | <a href="#">nucleocytoplasmic transport</a>                                                        | <a href="#">RT</a> |     | 35                     | 7.2E-10  | 8.9E-8    |
| <input type="checkbox"/> | GOTERM_BP_ALL   | <a href="#">nuclear transport</a>                                                                  | <a href="#">RT</a> |     | 35                     | 9.3E-10  | 1.1E-7    |
| <input type="checkbox"/> | GOTERM_CC_ALL   | <a href="#">nuclear envelope</a>                                                                   | <a href="#">RT</a> |     | 35                     | 2.8E-9   | 6.6E-8    |
| <input type="checkbox"/> | SP_PIR_KEYWORDS | <a href="#">translocation</a>                                                                      | <a href="#">RT</a> |     | 21                     | 6.4E-8   | 1.9E-6    |
| <input type="checkbox"/> | GOTERM_BP_ALL   | <a href="#">protein targeting</a>                                                                  | <a href="#">RT</a> |     | 48                     | 3.8E-7   | 3.5E-5    |
| <input type="checkbox"/> | GOTERM_BP_ALL   | <a href="#">intracellular protein transport across a membrane</a>                                  | <a href="#">RT</a> |     | 19                     | 6.9E-7   | 6.3E-5    |
| <input type="checkbox"/> | GOTERM_BP_ALL   | <a href="#">protein import</a>                                                                     | <a href="#">RT</a> |     | 23                     | 2.7E-6   | 2.2E-4    |
| <input type="checkbox"/> | SP_PIR_KEYWORDS | <a href="#">nuclear pore complex</a>                                                               | <a href="#">RT</a> |     | 11                     | 2.3E-5   | 4.7E-4    |
| <input type="checkbox"/> | GOTERM_BP_ALL   | <a href="#">nuclear import</a>                                                                     | <a href="#">RT</a> |     | 19                     | 4.0E-5   | 2.4E-3    |
| <input type="checkbox"/> | GOTERM_BP_ALL   | <a href="#">protein import into nucleus</a>                                                        | <a href="#">RT</a> |     | 18                     | 9.6E-5   | 5.3E-3    |
| <input type="checkbox"/> | GOTERM_BP_ALL   | <a href="#">intracellular protein transport</a>                                                    | <a href="#">RT</a> |     | 65                     | 9.7E-5   | 5.3E-3    |
| <input type="checkbox"/> | SP_PIR_KEYWORDS | <a href="#">protein transport</a>                                                                  | <a href="#">RT</a> |     | 59                     | 2.0E-4   | 3.6E-3    |

| <input type="checkbox"/> | GOTERM_CC_ALL         | <a href="#">endomembrane system</a>                   | RT                     |  |          |  |  |  |       |         |           |
|--------------------------|-----------------------|-------------------------------------------------------|------------------------|--|----------|--|--|--|-------|---------|-----------|
|                          | Annotation Cluster 17 |                                                       | Enrichment Score: 6.41 |  | <b>G</b> |  |  |  | Count | P_Value | Benjamini |
| <input type="checkbox"/> | GOTERM_CC_ALL         | <a href="#">envelope</a>                              | RT                     |  |          |  |  |  | 84    | 2.9E-12 | 9.2E-11   |
| <input type="checkbox"/> | GOTERM_CC_ALL         | <a href="#">organelle envelope</a>                    | RT                     |  |          |  |  |  | 83    | 5.1E-12 | 1.5E-10   |
| <input type="checkbox"/> | GOTERM_CC_ALL         | <a href="#">mitochondrial part</a>                    | RT                     |  |          |  |  |  | 61    | 3.8E-7  | 7.3E-6    |
| <input type="checkbox"/> | GOTERM_CC_ALL         | <a href="#">organelle membrane</a>                    | RT                     |  |          |  |  |  | 90    | 1.1E-5  | 1.7E-4    |
| <input type="checkbox"/> | GOTERM_CC_ALL         | <a href="#">organelle inner membrane</a>              | RT                     |  |          |  |  |  | 45    | 2.2E-5  | 3.1E-4    |
| <input type="checkbox"/> | GOTERM_CC_ALL         | <a href="#">mitochondrial envelope</a>                | RT                     |  |          |  |  |  | 48    | 6.1E-5  | 8.4E-4    |
| <input type="checkbox"/> | GOTERM_CC_ALL         | <a href="#">mitochondrial inner membrane</a>          | RT                     |  |          |  |  |  | 42    | 7.7E-5  | 1.0E-3    |
| <input type="checkbox"/> | GOTERM_CC_ALL         | <a href="#">mitochondrial membrane</a>                | RT                     |  |          |  |  |  | 45    | 8.6E-5  | 1.1E-3    |
|                          | Annotation Cluster 18 |                                                       | Enrichment Score: 6.37 |  | <b>G</b> |  |  |  | Count | P_Value | Benjamini |
| <input type="checkbox"/> | KEGG_PATHWAY          | <a href="#">Pyrimidine metabolism</a>                 | RT                     |  |          |  |  |  | 37    | 3.3E-15 | 7.0E-13   |
| <input type="checkbox"/> | KEGG_PATHWAY          | <a href="#">Purine metabolism</a>                     | RT                     |  |          |  |  |  | 39    | 1.5E-9  | 8.1E-8    |
| <input type="checkbox"/> | KEGG_PATHWAY          | <a href="#">DNA polymerase</a>                        | RT                     |  |          |  |  |  | 12    | 7.4E-6  | 2.2E-4    |
| <input type="checkbox"/> | GOTERM_MF_ALL         | <a href="#">DNA-directed DNA polymerase activity</a>  | RT                     |  |          |  |  |  | 12    | 2.0E-5  | 1.7E-3    |
| <input type="checkbox"/> | GOTERM_MF_ALL         | <a href="#">nucleotidyltransferase activity</a>       | RT                     |  |          |  |  |  | 26    | 2.9E-5  | 2.3E-3    |
| <input type="checkbox"/> | SP_PIR_KEYWORDS       | <a href="#">DNA-directed DNA polymerase</a>           | RT                     |  |          |  |  |  | 9     | 2.2E-4  | 3.9E-3    |
| <input type="checkbox"/> | SP_PIR_KEYWORDS       | <a href="#">Nucleotidyltransferase</a>                | RT                     |  |          |  |  |  | 17    | 5.5E-4  | 9.1E-3    |
|                          | Annotation Cluster 19 |                                                       | Enrichment Score: 6.26 |  | <b>G</b> |  |  |  | Count | P_Value | Benjamini |
| <input type="checkbox"/> | GOTERM_CC_ALL         | <a href="#">nucleolus</a>                             | RT                     |  |          |  |  |  | 49    | 3.1E-17 | 1.3E-15   |
| <input type="checkbox"/> | GOTERM_CC_ALL         | <a href="#">organelle lumen</a>                       | RT                     |  |          |  |  |  | 132   | 1.0E-10 | 2.7E-9    |
| <input type="checkbox"/> | GOTERM_CC_ALL         | <a href="#">membrane-enclosed lumen</a>               | RT                     |  |          |  |  |  | 132   | 1.0E-10 | 2.7E-9    |
| <input type="checkbox"/> | GOTERM_CC_ALL         | <a href="#">nuclear lumen</a>                         | RT                     |  |          |  |  |  | 106   | 1.4E-6  | 2.4E-5    |
| <input type="checkbox"/> | GOTERM_CC_ALL         | <a href="#">nucleoplasm</a>                           | RT                     |  |          |  |  |  | 63    | 1.8E-1  | 7.1E-1    |
| <input type="checkbox"/> | GOTERM_CC_ALL         | <a href="#">nucleoplasm part</a>                      | RT                     |  |          |  |  |  | 58    | 2.4E-1  | 8.1E-1    |
| <input type="checkbox"/> | GOTERM_CC_ALL         | <a href="#">transcription factor complex</a>          | RT                     |  |          |  |  |  | 33    | 9.2E-1  | 1.0E0     |
|                          | Annotation Cluster 20 |                                                       | Enrichment Score: 6.08 |  | <b>G</b> |  |  |  | Count | P_Value | Benjamini |
| <input type="checkbox"/> | GOTERM_CC_ALL         | <a href="#">ribonucleoprotein complex</a>             | RT                     |  |          |  |  |  | 114   | 1.2E-27 | 9.4E-26   |
| <input type="checkbox"/> | SP_PIR_KEYWORDS       | <a href="#">ribonucleoprotein</a>                     | RT                     |  |          |  |  |  | 68    | 3.9E-17 | 3.7E-15   |
| <input type="checkbox"/> | SP_PIR_KEYWORDS       | <a href="#">ribosomal protein</a>                     | RT                     |  |          |  |  |  | 40    | 7.3E-8  | 2.0E-6    |
| <input type="checkbox"/> | GOTERM_CC_ALL         | <a href="#">ribosome</a>                              | RT                     |  |          |  |  |  | 38    | 9.8E-7  | 1.8E-5    |
| <input type="checkbox"/> | GOTERM_MF_ALL         | <a href="#">structural constituent of ribosome</a>    | RT                     |  |          |  |  |  | 36    | 2.0E-6  | 2.0E-4    |
| <input type="checkbox"/> | GOTERM_CC_ALL         | <a href="#">mitochondrial ribosome</a>                | RT                     |  |          |  |  |  | 14    | 1.8E-5  | 2.7E-4    |
| <input type="checkbox"/> | GOTERM_CC_ALL         | <a href="#">organelle ribosome</a>                    | RT                     |  |          |  |  |  | 14    | 1.8E-5  | 2.7E-4    |
| <input type="checkbox"/> | GOTERM_CC_ALL         | <a href="#">mitochondrial lumen</a>                   | RT                     |  |          |  |  |  | 16    | 1.8E-4  | 2.2E-3    |
| <input type="checkbox"/> | GOTERM_CC_ALL         | <a href="#">mitochondrial matrix</a>                  | RT                     |  |          |  |  |  | 16    | 1.8E-4  | 2.2E-3    |
| <input type="checkbox"/> | GOTERM_CC_ALL         | <a href="#">ribosomal subunit</a>                     | RT                     |  |          |  |  |  | 13    | 1.2E-2  | 1.1E-1    |
| <input type="checkbox"/> | GOTERM_CC_ALL         | <a href="#">organelle large ribosomal subunit</a>     | RT                     |  |          |  |  |  | 5     | 5.8E-2  | 3.7E-1    |
| <input type="checkbox"/> | GOTERM_CC_ALL         | <a href="#">mitochondrial large ribosomal subunit</a> | RT                     |  |          |  |  |  | 5     | 5.8E-2  | 3.7E-1    |
| <input type="checkbox"/> | GOTERM_CC_ALL         | <a href="#">large ribosomal subunit</a>               | RT                     |  |          |  |  |  | 6     | 1.6E-1  | 6.9E-1    |
| <input type="checkbox"/> | GOTERM_MF_ALL         | <a href="#">structural molecule activity</a>          | RT                     |  |          |  |  |  | 59    | 1.8E-1  | 9.6E-1    |
|                          | Annotation Cluster 21 |                                                       | Enrichment Score: 5.99 |  | <b>G</b> |  |  |  | Count | P_Value | Benjamini |
| <input type="checkbox"/> | SMART                 | <a href="#">AAA</a>                                   | RT                     |  |          |  |  |  | 23    | 7.4E-8  | 1.5E-5    |
| <input type="checkbox"/> | INTERPRO              | <a href="#">AAA ATPase, core</a>                      | RT                     |  |          |  |  |  | 16    | 6.8E-7  | 9.8E-4    |
| <input type="checkbox"/> | INTERPRO              | <a href="#">AAA+ ATPase, core</a>                     | RT                     |  |          |  |  |  | 19    | 2.1E-5  | 1.5E-2    |
|                          | Annotation Cluster 22 |                                                       | Enrichment Score: 5.86 |  | <b>G</b> |  |  |  | Count | P_Value | Benjamini |
| <input type="checkbox"/> | GOTERM_BP_ALL         | <a href="#">tRNA metabolic process</a>                | RT                     |  |          |  |  |  | 44    | 2.2E-17 | 6.2E-15   |
| <input type="checkbox"/> | SP_PIR_KEYWORDS       | <a href="#">protein biosynthesis</a>                  | RT                     |  |          |  |  |  | 36    | 9.2E-9  | 3.1E-7    |
| <input type="checkbox"/> | SP_PIR_KEYWORDS       | <a href="#">aminoacyl-tRNA synthetase</a>             | RT                     |  |          |  |  |  | 18    | 1.4E-8  | 4.6E-7    |
| <input type="checkbox"/> | GOTERM_BP_ALL         | <a href="#">tRNA aminoacylation</a>                   | RT                     |  |          |  |  |  | 20    | 3.4E-7  | 3.3E-5    |

|                          |                 |                                                                               |          |  |       |         |           |
|--------------------------|-----------------|-------------------------------------------------------------------------------|----------|--|-------|---------|-----------|
| <input type="checkbox"/> | GOTERM_BP_ALL   | <a href="#">tRNA aminoacylation for protein translation</a>                   | RT       |  | 20    | 3.4E-7  | 3.3E-5    |
| <input type="checkbox"/> | GOTERM_BP_ALL   | <a href="#">amino acid activation</a>                                         | RT       |  | 20    | 3.4E-7  | 3.3E-5    |
| <input type="checkbox"/> | KEGG_PATHWAY    | <a href="#">Aminoacyl-tRNA biosynthesis</a>                                   | RT       |  | 15    | 7.0E-7  | 3.0E-5    |
| <input type="checkbox"/> | GOTERM_MF_ALL   | <a href="#">ligase activity, forming carbon-oxygen bonds</a>                  | RT       |  | 20    | 7.5E-7  | 1.0E-4    |
| <input type="checkbox"/> | GOTERM_MF_ALL   | <a href="#">ligase activity, forming aminoacyl-tRNA and related compounds</a> | RT       |  | 20    | 7.5E-7  | 1.0E-4    |
| <input type="checkbox"/> | GOTERM_MF_ALL   | <a href="#">aminoacyl-tRNA ligase activity</a>                                | RT       |  | 20    | 7.5E-7  | 1.0E-4    |
| <input type="checkbox"/> | SP_PIR_KEYWORDS | <a href="#">ligase</a>                                                        | RT       |  | 46    | 5.9E-6  | 1.3E-4    |
| <input type="checkbox"/> | GOTERM_BP_ALL   | <a href="#">amino acid and derivative metabolic process</a>                   | RT       |  | 56    | 9.5E-6  | 7.0E-4    |
| <input type="checkbox"/> | GOTERM_BP_ALL   | <a href="#">nitrogen compound metabolic process</a>                           | RT       |  | 65    | 2.7E-5  | 1.6E-3    |
| <input type="checkbox"/> | GOTERM_BP_ALL   | <a href="#">amino acid metabolic process</a>                                  | RT       |  | 45    | 4.3E-5  | 2.6E-3    |
| <input type="checkbox"/> | GOTERM_MF_ALL   | <a href="#">ligase activity</a>                                               | RT       |  | 55    | 5.9E-5  | 4.2E-3    |
| <input type="checkbox"/> | GOTERM_BP_ALL   | <a href="#">amine metabolic process</a>                                       | RT       |  | 59    | 1.2E-4  | 6.1E-3    |
| <input type="checkbox"/> | GOTERM_BP_ALL   | <a href="#">carboxylic acid metabolic process</a>                             | RT       |  | 67    | 2.1E-3  | 7.2E-2    |
| <input type="checkbox"/> | GOTERM_BP_ALL   | <a href="#">organic acid metabolic process</a>                                | RT       |  | 67    | 2.2E-3  | 7.5E-2    |
| <input type="checkbox"/> | INTERPRO        | <a href="#">Aminoacyl-tRNA synthetase, class I</a>                            | RT       |  | 8     | 8.0E-3  | 6.2E-1    |
| Annotation Cluster 23    |                 | Enrichment Score: 5.63                                                        | <b>G</b> |  | Count | P_Value | Benjamini |
| <input type="checkbox"/> | GOTERM_MF_ALL   | <a href="#">nuclease activity</a>                                             | RT       |  | 37    | 1.2E-8  | 1.9E-6    |
| <input type="checkbox"/> | GOTERM_MF_ALL   | <a href="#">exonuclease activity</a>                                          | RT       |  | 21    | 2.0E-8  | 3.2E-6    |
| <input type="checkbox"/> | SP_PIR_KEYWORDS | <a href="#">Exonuclease</a>                                                   | RT       |  | 15    | 4.1E-7  | 1.0E-5    |
| <input type="checkbox"/> | SP_PIR_KEYWORDS | <a href="#">Exosome</a>                                                       | RT       |  | 6     | 5.8E-4  | 9.5E-3    |
| <input type="checkbox"/> | SP_PIR_KEYWORDS | <a href="#">nuclease</a>                                                      | RT       |  | 17    | 1.2E-3  | 1.7E-2    |
| Annotation Cluster 24    |                 | Enrichment Score: 5.61                                                        | <b>G</b> |  | Count | P_Value | Benjamini |
| <input type="checkbox"/> | KEGG_PATHWAY    | <a href="#">Biosynthesis of steroids</a>                                      | RT       |  | 17    | 1.5E-11 | 1.0E-9    |
| <input type="checkbox"/> | GOTERM_BP_ALL   | <a href="#">sterol biosynthetic process</a>                                   | RT       |  | 19    | 2.4E-11 | 3.5E-9    |
| <input type="checkbox"/> | SP_PIR_KEYWORDS | <a href="#">lipid synthesis</a>                                               | RT       |  | 28    | 1.2E-9  | 4.6E-8    |
| <input type="checkbox"/> | SP_PIR_KEYWORDS | <a href="#">sterol biosynthesis</a>                                           | RT       |  | 14    | 3.0E-9  | 1.1E-7    |
| <input type="checkbox"/> | SP_PIR_KEYWORDS | <a href="#">steroid biosynthesis</a>                                          | RT       |  | 16    | 5.1E-8  | 1.5E-6    |
| <input type="checkbox"/> | GOTERM_BP_ALL   | <a href="#">cholesterol biosynthetic process</a>                              | RT       |  | 14    | 5.3E-8  | 5.5E-6    |
| <input type="checkbox"/> | GOTERM_BP_ALL   | <a href="#">sterol metabolic process</a>                                      | RT       |  | 23    | 1.1E-6  | 9.6E-5    |
| <input type="checkbox"/> | SP_PIR_KEYWORDS | <a href="#">cholesterol biosynthesis</a>                                      | RT       |  | 10    | 1.3E-6  | 2.9E-5    |
| <input type="checkbox"/> | GOTERM_BP_ALL   | <a href="#">lipid biosynthetic process</a>                                    | RT       |  | 48    | 1.8E-6  | 1.5E-4    |
| <input type="checkbox"/> | GOTERM_BP_ALL   | <a href="#">steroid biosynthetic process</a>                                  | RT       |  | 22    | 2.7E-6  | 2.2E-4    |
| <input type="checkbox"/> | GOTERM_BP_ALL   | <a href="#">isoprenoid biosynthetic process</a>                               | RT       |  | 10    | 1.7E-5  | 1.2E-3    |
| <input type="checkbox"/> | GOTERM_BP_ALL   | <a href="#">cholesterol metabolic process</a>                                 | RT       |  | 18    | 1.7E-4  | 8.8E-3    |
| <input type="checkbox"/> | GOTERM_BP_ALL   | <a href="#">alcohol metabolic process</a>                                     | RT       |  | 44    | 6.5E-4  | 2.6E-2    |
| <input type="checkbox"/> | GOTERM_BP_ALL   | <a href="#">steroid metabolic process</a>                                     | RT       |  | 28    | 7.9E-4  | 3.1E-2    |
| <input type="checkbox"/> | GOTERM_BP_ALL   | <a href="#">isoprenoid metabolic process</a>                                  | RT       |  | 10    | 2.2E-3  | 7.5E-2    |
| <input type="checkbox"/> | GOTERM_BP_ALL   | <a href="#">cellular lipid metabolic process</a>                              | RT       |  | 59    | 1.4E-1  | 9.2E-1    |
| <input type="checkbox"/> | GOTERM_BP_ALL   | <a href="#">lipid metabolic process</a>                                       | RT       |  | 60    | 4.8E-1  | 1.0E0     |
| Annotation Cluster 25    |                 | Enrichment Score: 4.89                                                        | <b>G</b> |  | Count | P_Value | Benjamini |
| <input type="checkbox"/> | GOTERM_BP_ALL   | <a href="#">chromosome segregation</a>                                        | RT       |  | 27    | 5.5E-13 | 9.5E-11   |
| <input type="checkbox"/> | GOTERM_BP_ALL   | <a href="#">mitotic sister chromatid segregation</a>                          | RT       |  | 11    | 1.5E-5  | 1.0E-3    |
| <input type="checkbox"/> | GOTERM_BP_ALL   | <a href="#">sister chromatid segregation</a>                                  | RT       |  | 11    | 2.3E-5  | 1.5E-3    |
| <input type="checkbox"/> | GOTERM_BP_ALL   | <a href="#">mitotic chromosome condensation</a>                               | RT       |  | 7     | 1.4E-3  | 5.1E-2    |
| <input type="checkbox"/> | GOTERM_BP_ALL   | <a href="#">chromosome condensation</a>                                       | RT       |  | 8     | 1.9E-3  | 6.8E-2    |
| <input type="checkbox"/> | SP_PIR_KEYWORDS | <a href="#">dna condensation</a>                                              | RT       |  | 5     | 9.3E-3  | 1.1E-1    |
| Annotation Cluster 26    |                 | Enrichment Score: 4.84                                                        | <b>G</b> |  | Count | P_Value | Benjamini |
| <input type="checkbox"/> | SMART           | <a href="#">WD40</a>                                                          | RT       |  | 42    | 1.2E-9  | 3.5E-7    |

|                          |                 |                                                                                                      |                    |  |       |         |           |
|--------------------------|-----------------|------------------------------------------------------------------------------------------------------|--------------------|--|-------|---------|-----------|
| <input type="checkbox"/> | INTERPRO        | <a href="#">WD40 repeat</a>                                                                          | <a href="#">RT</a> |  | 38    | 7.6E-6  | 8.7E-3    |
| <input type="checkbox"/> | UP_SEQ_FEATURE  | repeat:WD 4                                                                                          | <a href="#">RT</a> |  | 29    | 1.2E-5  | 3.2E-2    |
| <input type="checkbox"/> | SP_PIR_KEYWORDS | <a href="#">wd repeat</a>                                                                            | <a href="#">RT</a> |  | 43    | 1.6E-5  | 3.3E-4    |
| <input type="checkbox"/> | UP_SEQ_FEATURE  | repeat:WD 2                                                                                          | <a href="#">RT</a> |  | 30    | 1.7E-5  | 3.4E-2    |
| <input type="checkbox"/> | UP_SEQ_FEATURE  | repeat:WD 1                                                                                          | <a href="#">RT</a> |  | 30    | 1.7E-5  | 3.4E-2    |
| <input type="checkbox"/> | UP_SEQ_FEATURE  | repeat:WD 5                                                                                          | <a href="#">RT</a> |  | 27    | 2.6E-5  | 4.6E-2    |
| <input type="checkbox"/> | UP_SEQ_FEATURE  | repeat:WD 3                                                                                          | <a href="#">RT</a> |  | 29    | 3.5E-5  | 5.4E-2    |
| <input type="checkbox"/> | UP_SEQ_FEATURE  | repeat:WD 6                                                                                          | <a href="#">RT</a> |  | 21    | 2.2E-4  | 2.5E-1    |
| <input type="checkbox"/> | UP_SEQ_FEATURE  | repeat:WD 7                                                                                          | <a href="#">RT</a> |  | 14    | 4.0E-3  | 9.6E-1    |
| Annotation Cluster 27    |                 | Enrichment Score: 4.77                                                                               | <b>G</b>           |  | Count | P_Value | Benjamini |
| <input type="checkbox"/> | GOTERM_MF_ALL   | <a href="#">transferase activity, transferring one-carbon groups</a>                                 | <a href="#">RT</a> |  | 39    | 3.4E-8  | 5.0E-6    |
| <input type="checkbox"/> | GOTERM_MF_ALL   | <a href="#">methyltransferase activity</a>                                                           | <a href="#">RT</a> |  | 38    | 6.4E-8  | 9.1E-6    |
| <input type="checkbox"/> | SP_PIR_KEYWORDS | <a href="#">methyltransferase</a>                                                                    | <a href="#">RT</a> |  | 25    | 9.5E-5  | 1.8E-3    |
| <input type="checkbox"/> | GOTERM_MF_ALL   | <a href="#">S-adenosylmethionine-dependent methyltransferase activity</a>                            | <a href="#">RT</a> |  | 16    | 1.9E-3  | 8.7E-2    |
| <input type="checkbox"/> | SP_PIR_KEYWORDS | <a href="#">s-adenosyl-l-methionine</a>                                                              | <a href="#">RT</a> |  | 15    | 3.4E-3  | 4.3E-2    |
| Annotation Cluster 28    |                 | Enrichment Score: 4.6                                                                                | <b>G</b>           |  | Count | P_Value | Benjamini |
| <input type="checkbox"/> | GOTERM_BP_ALL   | <a href="#">protein-RNA complex assembly</a>                                                         | <a href="#">RT</a> |  | 25    | 4.4E-7  | 4.0E-5    |
| <input type="checkbox"/> | GOTERM_BP_ALL   | <a href="#">nuclear mRNA splicing, via spliceosome</a>                                               | <a href="#">RT</a> |  | 17    | 2.6E-5  | 1.7E-3    |
| <input type="checkbox"/> | GOTERM_BP_ALL   | <a href="#">RNA splicing, via transesterification reactions with bulged adenosine as nucleophile</a> | <a href="#">RT</a> |  | 17    | 2.6E-5  | 1.7E-3    |
| <input type="checkbox"/> | GOTERM_BP_ALL   | <a href="#">RNA splicing, via transesterification reactions</a>                                      | <a href="#">RT</a> |  | 17    | 2.6E-5  | 1.7E-3    |
| <input type="checkbox"/> | GOTERM_BP_ALL   | <a href="#">spliceosome assembly</a>                                                                 | <a href="#">RT</a> |  | 9     | 1.2E-3  | 4.7E-2    |
| Annotation Cluster 29    |                 | Enrichment Score: 4.54                                                                               | <b>G</b>           |  | Count | P_Value | Benjamini |
| <input type="checkbox"/> | GOTERM_CC_ALL   | <a href="#">replication fork</a>                                                                     | <a href="#">RT</a> |  | 15    | 6.1E-9  | 1.4E-7    |
| <input type="checkbox"/> | GOTERM_CC_ALL   | <a href="#">nuclear chromosome part</a>                                                              | <a href="#">RT</a> |  | 24    | 3.9E-8  | 8.1E-7    |
| <input type="checkbox"/> | KEGG_PATHWAY    | <a href="#">DNA polymerase</a>                                                                       | <a href="#">RT</a> |  | 12    | 7.4E-6  | 2.2E-4    |
| <input type="checkbox"/> | GOTERM_CC_ALL   | <a href="#">replisome</a>                                                                            | <a href="#">RT</a> |  | 8     | 1.0E-5  | 1.6E-4    |
| <input type="checkbox"/> | GOTERM_CC_ALL   | <a href="#">nuclear replisome</a>                                                                    | <a href="#">RT</a> |  | 8     | 1.0E-5  | 1.6E-4    |
| <input type="checkbox"/> | GOTERM_CC_ALL   | <a href="#">nuclear replication fork</a>                                                             | <a href="#">RT</a> |  | 8     | 1.0E-5  | 1.6E-4    |
| <input type="checkbox"/> | GOTERM_CC_ALL   | <a href="#">alpha DNA polymerase:primase complex</a>                                                 | <a href="#">RT</a> |  | 4     | 2.6E-3  | 2.8E-2    |
| <input type="checkbox"/> | GOTERM_MF_ALL   | <a href="#">DNA primase activity</a>                                                                 | <a href="#">RT</a> |  | 3     | 4.2E-2  | 6.7E-1    |
| <input type="checkbox"/> | GOTERM_CC_ALL   | <a href="#">DNA replication factor A complex</a>                                                     | <a href="#">RT</a> |  | 3     | 6.6E-2  | 4.0E-1    |
| Annotation Cluster 30    |                 | Enrichment Score: 4.51                                                                               | <b>G</b>           |  | Count | P_Value | Benjamini |
| <input type="checkbox"/> | GOTERM_BP_ALL   | <a href="#">protein-RNA complex assembly</a>                                                         | <a href="#">RT</a> |  | 25    | 4.4E-7  | 4.0E-5    |
| <input type="checkbox"/> | GOTERM_BP_ALL   | <a href="#">cellular component assembly</a>                                                          | <a href="#">RT</a> |  | 61    | 1.4E-4  | 7.3E-3    |
| <input type="checkbox"/> | GOTERM_BP_ALL   | <a href="#">macromolecular complex assembly</a>                                                      | <a href="#">RT</a> |  | 52    | 4.7E-4  | 2.1E-2    |
| Annotation Cluster 31    |                 | Enrichment Score: 4.03                                                                               | <b>G</b>           |  | Count | P_Value | Benjamini |
| <input type="checkbox"/> | GOTERM_MF_ALL   | <a href="#">carbon-oxygen lyase activity</a>                                                         | <a href="#">RT</a> |  | 18    | 5.7E-5  | 4.2E-3    |
| <input type="checkbox"/> | GOTERM_MF_ALL   | <a href="#">lyase activity</a>                                                                       | <a href="#">RT</a> |  | 32    | 8.9E-5  | 6.1E-3    |
| <input type="checkbox"/> | GOTERM_MF_ALL   | <a href="#">hydro-lyase activity</a>                                                                 | <a href="#">RT</a> |  | 16    | 9.8E-5  | 6.5E-3    |
| <input type="checkbox"/> | GOTERM_MF_ALL   | <a href="#">pseudouridylate synthase activity</a>                                                    | <a href="#">RT</a> |  | 7     | 1.5E-4  | 9.7E-3    |
| Annotation Cluster 32    |                 | Enrichment Score: 3.97                                                                               | <b>G</b>           |  | Count | P_Value | Benjamini |
| <input type="checkbox"/> | GOTERM_CC_ALL   | <a href="#">spindle</a>                                                                              | <a href="#">RT</a> |  | 19    | 4.5E-7  | 8.5E-6    |
| <input type="checkbox"/> | GOTERM_BP_ALL   | <a href="#">regulation of mitosis</a>                                                                | <a href="#">RT</a> |  | 13    | 4.3E-4  | 1.9E-2    |
| <input type="checkbox"/> | GOTERM_CC_ALL   | <a href="#">spindle pole</a>                                                                         | <a href="#">RT</a> |  | 7     | 6.3E-3  | 6.2E-2    |
| Annotation Cluster 33    |                 | Enrichment Score: 3.85                                                                               | <b>G</b>           |  | Count | P_Value | Benjamini |
| <input type="checkbox"/> | GOTERM_BP_ALL   | <a href="#">DNA replication initiation</a>                                                           | <a href="#">RT</a> |  | 13    | 3.5E-9  | 4.1E-7    |
| <input type="checkbox"/> | INTERPRO        | <a href="#">Nucleic acid-binding, OB-fold</a>                                                        | <a href="#">RT</a> |  | 18    | 2.1E-7  | 4.1E-4    |
| <input type="checkbox"/> | SMART           | <a href="#">MCM</a>                                                                                  | <a href="#">RT</a> |  | 7     | 2.1E-6  | 2.5E-4    |

| <input type="checkbox"/> | Term            | Description                                                          | RT                 | Bar | Count | P_Value | Benjamini |
|--------------------------|-----------------|----------------------------------------------------------------------|--------------------|-----|-------|---------|-----------|
| <input type="checkbox"/> | UP_SEQ_FEATURE  | domain:MCM                                                           | <a href="#">RT</a> |     | 7     | 5.6E-6  | 3.9E-2    |
| <input type="checkbox"/> | INTERPRO        | <a href="#">MCM</a>                                                  | <a href="#">RT</a> |     | 7     | 9.4E-6  | 7.8E-3    |
| <input type="checkbox"/> | SP_PIR_KEYWORDS | <a href="#">DNA replication initiation</a>                           | <a href="#">RT</a> |     | 5     | 3.2E-4  | 5.6E-3    |
| <input type="checkbox"/> | GOTERM_MF_ALL   | <a href="#">single-stranded DNA binding</a>                          | <a href="#">RT</a> |     | 10    | 1.4E-3  | 6.9E-2    |
| <input type="checkbox"/> | GOTERM_BP_ALL   | <a href="#">DNA geometric change</a>                                 | <a href="#">RT</a> |     | 6     | 4.4E-3  | 1.3E-1    |
| <input type="checkbox"/> | GOTERM_BP_ALL   | <a href="#">DNA duplex unwinding</a>                                 | <a href="#">RT</a> |     | 6     | 4.4E-3  | 1.3E-1    |
| <input type="checkbox"/> | GOTERM_BP_ALL   | <a href="#">DNA unwinding during replication</a>                     | <a href="#">RT</a> |     | 6     | 4.4E-3  | 1.3E-1    |
| <input type="checkbox"/> | SP_PIR_KEYWORDS | <a href="#">heterohexamer</a>                                        | <a href="#">RT</a> |     | 3     | 2.4E-2  | 2.2E-1    |
| <input type="checkbox"/> | SP_PIR_KEYWORDS | <a href="#">zinc finger</a>                                          | <a href="#">RT</a> |     | 7     | 7.4E-1  | 1.0E0     |
| Annotation Cluster 34    |                 | Enrichment Score: 3.74                                               | <b>G</b>           |     | Count | P_Value | Benjamini |
| <input type="checkbox"/> | UP_SEQ_FEATURE  | domain:RRM 2                                                         | <a href="#">RT</a> |     | 17    | 9.5E-6  | 4.4E-2    |
| <input type="checkbox"/> | UP_SEQ_FEATURE  | domain:RRM 1                                                         | <a href="#">RT</a> |     | 17    | 9.5E-6  | 4.4E-2    |
| <input type="checkbox"/> | UP_SEQ_FEATURE  | domain:RRM 3                                                         | <a href="#">RT</a> |     | 6     | 6.8E-2  | 1.0E0     |
| Annotation Cluster 35    |                 | Enrichment Score: 3.58                                               | <b>G</b>           |     | Count | P_Value | Benjamini |
| <input type="checkbox"/> | GOTERM_CC_ALL   | <a href="#">centrosome</a>                                           | <a href="#">RT</a> |     | 17    | 4.7E-5  | 6.6E-4    |
| <input type="checkbox"/> | GOTERM_CC_ALL   | <a href="#">microtubule organizing center</a>                        | <a href="#">RT</a> |     | 18    | 2.4E-4  | 2.9E-3    |
| <input type="checkbox"/> | GOTERM_CC_ALL   | <a href="#">microtubule organizing center part</a>                   | <a href="#">RT</a> |     | 8     | 1.6E-3  | 1.8E-2    |
| Annotation Cluster 36    |                 | Enrichment Score: 3.41                                               | <b>G</b>           |     | Count | P_Value | Benjamini |
| <input type="checkbox"/> | GOTERM_BP_ALL   | <a href="#">protein-RNA complex assembly</a>                         | <a href="#">RT</a> |     | 25    | 4.4E-7  | 4.0E-5    |
| <input type="checkbox"/> | GOTERM_BP_ALL   | <a href="#">translational initiation</a>                             | <a href="#">RT</a> |     | 15    | 3.2E-4  | 1.5E-2    |
| <input type="checkbox"/> | GOTERM_MF_ALL   | <a href="#">translation initiation factor activity</a>               | <a href="#">RT</a> |     | 18    | 7.6E-4  | 3.9E-2    |
| <input type="checkbox"/> | GOTERM_MF_ALL   | <a href="#">translation factor activity, nucleic acid binding</a>    | <a href="#">RT</a> |     | 22    | 2.4E-3  | 1.1E-1    |
| <input type="checkbox"/> | SP_PIR_KEYWORDS | <a href="#">initiation factor</a>                                    | <a href="#">RT</a> |     | 15    | 3.0E-3  | 3.8E-2    |
| <input type="checkbox"/> | GOTERM_MF_ALL   | <a href="#">translation regulator activity</a>                       | <a href="#">RT</a> |     | 22    | 4.4E-3  | 1.7E-1    |
| Annotation Cluster 37    |                 | Enrichment Score: 3.38                                               | <b>G</b>           |     | Count | P_Value | Benjamini |
| <input type="checkbox"/> | GOTERM_CC_ALL   | <a href="#">microtubule cytoskeleton</a>                             | <a href="#">RT</a> |     | 63    | 2.3E-9  | 5.7E-8    |
| <input type="checkbox"/> | GOTERM_CC_ALL   | <a href="#">microtubule</a>                                          | <a href="#">RT</a> |     | 43    | 4.7E-8  | 9.5E-7    |
| <input type="checkbox"/> | SP_PIR_KEYWORDS | <a href="#">microtubule</a>                                          | <a href="#">RT</a> |     | 35    | 3.6E-7  | 9.1E-6    |
| <input type="checkbox"/> | GOTERM_BP_ALL   | <a href="#">microtubule-based process</a>                            | <a href="#">RT</a> |     | 40    | 2.8E-6  | 2.2E-4    |
| <input type="checkbox"/> | SMART           | <a href="#">KISc</a>                                                 | <a href="#">RT</a> |     | 12    | 1.7E-5  | 1.5E-3    |
| <input type="checkbox"/> | GOTERM_CC_ALL   | <a href="#">cytoskeletal part</a>                                    | <a href="#">RT</a> |     | 76    | 7.4E-5  | 1.0E-3    |
| <input type="checkbox"/> | INTERPRO        | <a href="#">Kinesin, motor region</a>                                | <a href="#">RT</a> |     | 12    | 1.9E-4  | 7.4E-2    |
| <input type="checkbox"/> | GOTERM_BP_ALL   | <a href="#">microtubule cytoskeleton organization and biogenesis</a> | <a href="#">RT</a> |     | 18    | 4.1E-4  | 1.8E-2    |
| <input type="checkbox"/> | GOTERM_BP_ALL   | <a href="#">microtubule-based movement</a>                           | <a href="#">RT</a> |     | 21    | 9.2E-4  | 3.5E-2    |
| <input type="checkbox"/> | GOTERM_BP_ALL   | <a href="#">cytoskeleton-dependent intracellular transport</a>       | <a href="#">RT</a> |     | 22    | 2.7E-3  | 8.9E-2    |
| <input type="checkbox"/> | GOTERM_MF_ALL   | <a href="#">microtubule motor activity</a>                           | <a href="#">RT</a> |     | 14    | 1.0E-2  | 3.1E-1    |
| <input type="checkbox"/> | SP_PIR_KEYWORDS | <a href="#">motor protein</a>                                        | <a href="#">RT</a> |     | 16    | 1.9E-2  | 2.0E-1    |
| <input type="checkbox"/> | GOTERM_CC_ALL   | <a href="#">microtubule associated complex</a>                       | <a href="#">RT</a> |     | 14    | 1.2E-1  | 5.8E-1    |
| <input type="checkbox"/> | GOTERM_CC_ALL   | <a href="#">cytoskeleton</a>                                         | <a href="#">RT</a> |     | 89    | 1.4E-1  | 6.5E-1    |
| <input type="checkbox"/> | GOTERM_CC_ALL   | <a href="#">kinesin complex</a>                                      | <a href="#">RT</a> |     | 6     | 1.6E-1  | 6.9E-1    |
| <input type="checkbox"/> | GOTERM_MF_ALL   | <a href="#">motor activity</a>                                       | <a href="#">RT</a> |     | 17    | 1.7E-1  | 9.5E-1    |
| <input type="checkbox"/> | GOTERM_BP_ALL   | <a href="#">cytoskeleton organization and biogenesis</a>             | <a href="#">RT</a> |     | 53    | 1.7E-1  | 9.5E-1    |
| Annotation Cluster 38    |                 | Enrichment Score: 3.34                                               | <b>G</b>           |     | Count | P_Value | Benjamini |
| <input type="checkbox"/> | GOTERM_BP_ALL   | <a href="#">intracellular transport</a>                              | <a href="#">RT</a> |     | 106   | 5.1E-8  | 5.4E-6    |
| <input type="checkbox"/> | GOTERM_BP_ALL   | <a href="#">cellular component organization and biogenesis</a>       | <a href="#">RT</a> |     | 298   | 2.8E-7  | 2.8E-5    |
| <input type="checkbox"/> | GOTERM_BP_ALL   | <a href="#">protein targeting</a>                                    | <a href="#">RT</a> |     | 48    | 3.8E-7  | 3.5E-5    |
| <input type="checkbox"/> | GOTERM_BP_ALL   | <a href="#">establishment of cellular localization</a>               | <a href="#">RT</a> |     | 118   | 3.9E-6  | 3.0E-4    |
| <input type="checkbox"/> | GOTERM_BP_ALL   | <a href="#">cellular localization</a>                                | <a href="#">RT</a> |     | 120   | 4.6E-6  | 3.5E-4    |

| <input type="checkbox"/> |                       |                                                                          |                    |  |  |  |  |       |         |           |
|--------------------------|-----------------------|--------------------------------------------------------------------------|--------------------|--|--|--|--|-------|---------|-----------|
| <input type="checkbox"/> | GOTERM_BP_ALL         | <a href="#">intracellular protein transport</a>                          | <a href="#">RT</a> |  |  |  |  | 65    | 9.7E-5  | 5.3E-3    |
| <input type="checkbox"/> | SP_PIR_KEYWORDS       | <a href="#">protein transport</a>                                        | <a href="#">RT</a> |  |  |  |  | 59    | 2.0E-4  | 3.6E-3    |
| <input type="checkbox"/> | GOTERM_BP_ALL         | <a href="#">macromolecule localization</a>                               | <a href="#">RT</a> |  |  |  |  | 106   | 2.2E-4  | 1.1E-2    |
| <input type="checkbox"/> | GOTERM_BP_ALL         | <a href="#">establishment of protein localization</a>                    | <a href="#">RT</a> |  |  |  |  | 89    | 3.9E-3  | 1.2E-1    |
| <input type="checkbox"/> | GOTERM_BP_ALL         | <a href="#">protein localization</a>                                     | <a href="#">RT</a> |  |  |  |  | 95    | 4.5E-3  | 1.4E-1    |
| <input type="checkbox"/> | GOTERM_BP_ALL         | <a href="#">protein transport</a>                                        | <a href="#">RT</a> |  |  |  |  | 84    | 4.9E-3  | 1.4E-1    |
| <input type="checkbox"/> | SP_PIR_KEYWORDS       | <a href="#">transport</a>                                                | <a href="#">RT</a> |  |  |  |  | 119   | 4.8E-1  | 9.9E-1    |
| <input type="checkbox"/> | GOTERM_BP_ALL         | <a href="#">establishment of localization</a>                            | <a href="#">RT</a> |  |  |  |  | 231   | 6.3E-1  | 1.0E0     |
| <input type="checkbox"/> | GOTERM_BP_ALL         | <a href="#">transport</a>                                                | <a href="#">RT</a> |  |  |  |  | 221   | 7.2E-1  | 1.0E0     |
| <input type="checkbox"/> | GOTERM_BP_ALL         | <a href="#">localization</a>                                             | <a href="#">RT</a> |  |  |  |  | 252   | 8.6E-1  | 1.0E0     |
|                          | Annotation Cluster 39 | Enrichment Score: 3.33                                                   | <b>G</b>           |  |  |  |  | Count | P_Value | Benjamini |
| <input type="checkbox"/> | GOTERM_MF_ALL         | <a href="#">helicase activity</a>                                        | <a href="#">RT</a> |  |  |  |  | 36    | 6.9E-9  | 1.2E-6    |
| <input type="checkbox"/> | SMART                 | <a href="#">DEXDc</a>                                                    | <a href="#">RT</a> |  |  |  |  | 23    | 2.5E-7  | 3.8E-5    |
| <input type="checkbox"/> | SP_PIR_KEYWORDS       | <a href="#">helicase</a>                                                 | <a href="#">RT</a> |  |  |  |  | 29    | 6.2E-7  | 1.5E-5    |
| <input type="checkbox"/> | GOTERM_MF_ALL         | <a href="#">ATP-dependent helicase activity</a>                          | <a href="#">RT</a> |  |  |  |  | 25    | 7.5E-6  | 6.7E-4    |
| <input type="checkbox"/> | SMART                 | <a href="#">HELICc</a>                                                   | <a href="#">RT</a> |  |  |  |  | 19    | 8.7E-6  | 8.7E-4    |
| <input type="checkbox"/> | INTERPRO              | <a href="#">DEAD-like helicase, N-terminal</a>                           | <a href="#">RT</a> |  |  |  |  | 20    | 1.2E-4  | 6.5E-2    |
| <input type="checkbox"/> | UP_SEQ_FEATURE        | domain:Helicase ATP-binding                                              | <a href="#">RT</a> |  |  |  |  | 14    | 1.4E-3  | 7.7E-1    |
| <input type="checkbox"/> | INTERPRO              | <a href="#">Helicase, superfamily 1 and 2, ATP-binding</a>               | <a href="#">RT</a> |  |  |  |  | 16    | 3.8E-3  | 5.1E-1    |
| <input type="checkbox"/> | INTERPRO              | <a href="#">DNA/RNA helicase, C-terminal</a>                             | <a href="#">RT</a> |  |  |  |  | 15    | 6.8E-3  | 5.8E-1    |
| <input type="checkbox"/> | UP_SEQ_FEATURE        | domain:Helicase C-terminal                                               | <a href="#">RT</a> |  |  |  |  | 12    | 7.9E-3  | 1.0E0     |
| <input type="checkbox"/> | INTERPRO              | <a href="#">SNF2-related</a>                                             | <a href="#">RT</a> |  |  |  |  | 8     | 8.0E-3  | 6.2E-1    |
| <input type="checkbox"/> | INTERPRO              | <a href="#">DNA/RNA helicase, DEAD/DEAH box type, N-terminal</a>         | <a href="#">RT</a> |  |  |  |  | 10    | 1.9E-2  | 8.7E-1    |
| <input type="checkbox"/> | UP_SEQ_FEATURE        | short sequence motif:Q motif                                             | <a href="#">RT</a> |  |  |  |  | 5     | 2.7E-1  | 1.0E0     |
| <input type="checkbox"/> | INTERPRO              | <a href="#">RNA helicase, DEAD-box type, Q motif</a>                     | <a href="#">RT</a> |  |  |  |  | 5     | 2.7E-1  | 1.0E0     |
| <input type="checkbox"/> | UP_SEQ_FEATURE        | short sequence motif:DEAD box                                            | <a href="#">RT</a> |  |  |  |  | 4     | 4.2E-1  | 1.0E0     |
|                          | Annotation Cluster 40 | Enrichment Score: 3.32                                                   | <b>G</b>           |  |  |  |  | Count | P_Value | Benjamini |
| <input type="checkbox"/> | GOTERM_MF_ALL         | <a href="#">snoRNA binding</a>                                           | <a href="#">RT</a> |  |  |  |  | 6     | 2.5E-4  | 1.4E-2    |
| <input type="checkbox"/> | GOTERM_CC_ALL         | <a href="#">nucleolar part</a>                                           | <a href="#">RT</a> |  |  |  |  | 12    | 2.5E-4  | 2.9E-3    |
| <input type="checkbox"/> | GOTERM_CC_ALL         | <a href="#">small nucleolar ribonucleoprotein complex</a>                | <a href="#">RT</a> |  |  |  |  | 7     | 1.8E-3  | 1.9E-2    |
|                          | Annotation Cluster 41 | Enrichment Score: 3.25                                                   | <b>G</b>           |  |  |  |  | Count | P_Value | Benjamini |
| <input type="checkbox"/> | GOTERM_BP_ALL         | <a href="#">nucleoside monophosphate biosynthetic process</a>            | <a href="#">RT</a> |  |  |  |  | 10    | 9.8E-6  | 7.1E-4    |
| <input type="checkbox"/> | GOTERM_BP_ALL         | <a href="#">nucleoside monophosphate metabolic process</a>               | <a href="#">RT</a> |  |  |  |  | 10    | 1.7E-5  | 1.2E-3    |
| <input type="checkbox"/> | GOTERM_BP_ALL         | <a href="#">ribonucleoside monophosphate biosynthetic process</a>        | <a href="#">RT</a> |  |  |  |  | 9     | 3.1E-5  | 1.9E-3    |
| <input type="checkbox"/> | GOTERM_BP_ALL         | <a href="#">ribonucleoside monophosphate metabolic process</a>           | <a href="#">RT</a> |  |  |  |  | 9     | 5.4E-5  | 3.1E-3    |
| <input type="checkbox"/> | SP_PIR_KEYWORDS       | <a href="#">purine biosynthesis</a>                                      | <a href="#">RT</a> |  |  |  |  | 7     | 3.3E-4  | 5.6E-3    |
| <input type="checkbox"/> | GOTERM_BP_ALL         | <a href="#">purine ribonucleoside monophosphate biosynthetic process</a> | <a href="#">RT</a> |  |  |  |  | 5     | 1.4E-2  | 3.2E-1    |
| <input type="checkbox"/> | GOTERM_BP_ALL         | <a href="#">purine nucleoside monophosphate biosynthetic process</a>     | <a href="#">RT</a> |  |  |  |  | 5     | 1.4E-2  | 3.2E-1    |
| <input type="checkbox"/> | GOTERM_BP_ALL         | <a href="#">purine ribonucleoside monophosphate metabolic process</a>    | <a href="#">RT</a> |  |  |  |  | 5     | 1.9E-2  | 4.0E-1    |
| <input type="checkbox"/> | GOTERM_BP_ALL         | <a href="#">purine nucleoside monophosphate metabolic process</a>        | <a href="#">RT</a> |  |  |  |  | 5     | 1.9E-2  | 4.0E-1    |
|                          | Annotation Cluster 42 | Enrichment Score: 3.19                                                   | <b>G</b>           |  |  |  |  | Count | P_Value | Benjamini |
| <input type="checkbox"/> | INTERPRO              | <a href="#">Chaperonin Cpn60</a>                                         | <a href="#">RT</a> |  |  |  |  | 7     | 6.1E-5  | 3.8E-2    |
| <input type="checkbox"/> | INTERPRO              | <a href="#">Chaperonin TCP-1</a>                                         | <a href="#">RT</a> |  |  |  |  | 7     | 1.2E-4  | 5.8E-2    |
| <input type="checkbox"/> | PIR_SUPERFAMILY       | PIRSF002584:molecular chaperone t-complex-type                           | <a href="#">RT</a> |  |  |  |  | 7     | 2.3E-4  | 3.0E-1    |
| <input type="checkbox"/> | GOTERM_CC_ALL         | <a href="#">chaperonin-containing T-complex</a>                          | <a href="#">RT</a> |  |  |  |  | 6     | 2.4E-4  | 2.9E-3    |
| <input type="checkbox"/> | INTERPRO              | <a href="#">Chaperonin Cpn60/TCP-1</a>                                   | <a href="#">RT</a> |  |  |  |  | 6     | 2.2E-3  | 4.1E-1    |

| <input type="checkbox"/> |                       |                                                                       |                        |  |          |  |  |  |  |       |         |           |
|--------------------------|-----------------------|-----------------------------------------------------------------------|------------------------|--|----------|--|--|--|--|-------|---------|-----------|
| <input type="checkbox"/> | GOTERM_CC_ALL         | <a href="#">cytosolic part</a>                                        | <a href="#">RT</a>     |  |          |  |  |  |  | 15    | 7.5E-2  | 4.3E-1    |
|                          | Annotation Cluster 43 |                                                                       | Enrichment Score: 3.1  |  | <b>G</b> |  |  |  |  | Count | P_Value | Benjamini |
| <input type="checkbox"/> | SP_PIR_KEYWORDS       | <a href="#">cell cycle control</a>                                    | <a href="#">RT</a>     |  |          |  |  |  |  | 15    | 4.5E-9  | 1.6E-7    |
| <input type="checkbox"/> | GOTERM_MF_ALL         | <a href="#">cyclin-dependent protein kinase regulator activity</a>    | <a href="#">RT</a>     |  |          |  |  |  |  | 10    | 8.8E-5  | 6.2E-3    |
| <input type="checkbox"/> | INTERPRO              | <a href="#">Cyclin, C-terminal</a>                                    | <a href="#">RT</a>     |  |          |  |  |  |  | 8     | 1.9E-4  | 7.1E-2    |
| <input type="checkbox"/> | PIR_SUPERFAMILY       | PIRSF001771:cyclin, A/B/D/E types                                     | <a href="#">RT</a>     |  |          |  |  |  |  | 7     | 2.3E-4  | 3.0E-1    |
| <input type="checkbox"/> | INTERPRO              | <a href="#">Cyclin, A/B/D/E</a>                                       | <a href="#">RT</a>     |  |          |  |  |  |  | 6     | 8.0E-4  | 2.1E-1    |
| <input type="checkbox"/> | SMART                 | <a href="#">CYCLIN</a>                                                | <a href="#">RT</a>     |  |          |  |  |  |  | 9     | 1.4E-3  | 8.1E-2    |
| <input type="checkbox"/> | INTERPRO              | <a href="#">Cyclin</a>                                                | <a href="#">RT</a>     |  |          |  |  |  |  | 9     | 4.6E-3  | 5.6E-1    |
| <input type="checkbox"/> | INTERPRO              | <a href="#">Cyclin-related</a>                                        | <a href="#">RT</a>     |  |          |  |  |  |  | 9     | 5.7E-3  | 5.5E-1    |
| <input type="checkbox"/> | INTERPRO              | <a href="#">Cyclin, N-terminal</a>                                    | <a href="#">RT</a>     |  |          |  |  |  |  | 8     | 6.4E-3  | 5.9E-1    |
| <input type="checkbox"/> | GOTERM_MF_ALL         | <a href="#">protein kinase regulator activity</a>                     | <a href="#">RT</a>     |  |          |  |  |  |  | 14    | 7.2E-3  | 2.5E-1    |
| <input type="checkbox"/> | GOTERM_MF_ALL         | <a href="#">kinase regulator activity</a>                             | <a href="#">RT</a>     |  |          |  |  |  |  | 16    | 7.6E-3  | 2.6E-1    |
| <input type="checkbox"/> | KEGG_PATHWAY          | <a href="#">p53 signaling pathway</a>                                 | <a href="#">RT</a>     |  |          |  |  |  |  | 14    | 9.0E-3  | 1.5E-1    |
| <input type="checkbox"/> | SP_PIR_KEYWORDS       | <a href="#">cyclin</a>                                                | <a href="#">RT</a>     |  |          |  |  |  |  | 12    | 3.6E-2  | 3.0E-1    |
|                          | Annotation Cluster 44 |                                                                       | Enrichment Score: 3.08 |  | <b>G</b> |  |  |  |  | Count | P_Value | Benjamini |
| <input type="checkbox"/> | GOTERM_BP_ALL         | <a href="#">meiotic cell cycle</a>                                    | <a href="#">RT</a>     |  |          |  |  |  |  | 19    | 1.8E-4  | 9.1E-3    |
| <input type="checkbox"/> | GOTERM_BP_ALL         | <a href="#">meiosis</a>                                               | <a href="#">RT</a>     |  |          |  |  |  |  | 18    | 4.8E-4  | 2.1E-2    |
| <input type="checkbox"/> | GOTERM_BP_ALL         | <a href="#">M phase of meiotic cell cycle</a>                         | <a href="#">RT</a>     |  |          |  |  |  |  | 18    | 4.8E-4  | 2.1E-2    |
| <input type="checkbox"/> | GOTERM_BP_ALL         | <a href="#">meiosis I</a>                                             | <a href="#">RT</a>     |  |          |  |  |  |  | 8     | 1.1E-2  | 2.8E-1    |
|                          | Annotation Cluster 45 |                                                                       | Enrichment Score: 3.08 |  | <b>G</b> |  |  |  |  | Count | P_Value | Benjamini |
| <input type="checkbox"/> | SP_PIR_KEYWORDS       | <a href="#">isomerase</a>                                             | <a href="#">RT</a>     |  |          |  |  |  |  | 30    | 1.2E-6  | 2.8E-5    |
| <input type="checkbox"/> | GOTERM_MF_ALL         | <a href="#">isomerase activity</a>                                    | <a href="#">RT</a>     |  |          |  |  |  |  | 35    | 1.5E-6  | 1.6E-4    |
| <input type="checkbox"/> | SP_PIR_KEYWORDS       | <a href="#">Rotamase</a>                                              | <a href="#">RT</a>     |  |          |  |  |  |  | 12    | 1.4E-4  | 2.7E-3    |
| <input type="checkbox"/> | GOTERM_MF_ALL         | <a href="#">peptidyl-prolyl cis-trans isomerase activity</a>          | <a href="#">RT</a>     |  |          |  |  |  |  | 12    | 1.5E-4  | 9.7E-3    |
| <input type="checkbox"/> | GOTERM_MF_ALL         | <a href="#">cis-trans isomerase activity</a>                          | <a href="#">RT</a>     |  |          |  |  |  |  | 12    | 2.0E-4  | 1.2E-2    |
| <input type="checkbox"/> | UP_SEQ_FEATURE        | domain:PPIase cyclophilin-type                                        | <a href="#">RT</a>     |  |          |  |  |  |  | 5     | 2.4E-2  | 1.0E0     |
| <input type="checkbox"/> | INTERPRO              | <a href="#">Peptidyl-prolyl cis-trans isomerase, cyclophilin-type</a> | <a href="#">RT</a>     |  |          |  |  |  |  | 5     | 5.2E-2  | 9.7E-1    |
| <input type="checkbox"/> | PIR_SUPERFAMILY       | PIRSF001467:peptidylprolyl isomerase                                  | <a href="#">RT</a>     |  |          |  |  |  |  | 3     | 1.4E-1  | 1.0E0     |
| <input type="checkbox"/> | INTERPRO              | <a href="#">Peptidyl-prolyl cis-trans isomerase, FKBP-type</a>        | <a href="#">RT</a>     |  |          |  |  |  |  | 4     | 1.5E-1  | 1.0E0     |
|                          | Annotation Cluster 46 |                                                                       | Enrichment Score: 3.07 |  | <b>G</b> |  |  |  |  | Count | P_Value | Benjamini |
| <input type="checkbox"/> | GOTERM_BP_ALL         | <a href="#">nucleobase metabolic process</a>                          | <a href="#">RT</a>     |  |          |  |  |  |  | 10    | 9.8E-6  | 7.1E-4    |
| <input type="checkbox"/> | GOTERM_BP_ALL         | <a href="#">heterocycle metabolic process</a>                         | <a href="#">RT</a>     |  |          |  |  |  |  | 19    | 4.8E-4  | 2.0E-2    |
| <input type="checkbox"/> | GOTERM_BP_ALL         | <a href="#">purine base metabolic process</a>                         | <a href="#">RT</a>     |  |          |  |  |  |  | 6     | 5.8E-4  | 2.4E-2    |
| <input type="checkbox"/> | GOTERM_BP_ALL         | <a href="#">aromatic compound metabolic process</a>                   | <a href="#">RT</a>     |  |          |  |  |  |  | 16    | 2.0E-1  | 9.7E-1    |
|                          | Annotation Cluster 47 |                                                                       | Enrichment Score: 2.95 |  | <b>G</b> |  |  |  |  | Count | P_Value | Benjamini |
| <input type="checkbox"/> | GOTERM_MF_ALL         | <a href="#">nucleotidyltransferase activity</a>                       | <a href="#">RT</a>     |  |          |  |  |  |  | 26    | 2.9E-5  | 2.3E-3    |
| <input type="checkbox"/> | GOTERM_MF_ALL         | <a href="#">DNA-directed RNA polymerase activity</a>                  | <a href="#">RT</a>     |  |          |  |  |  |  | 12    | 3.3E-4  | 1.8E-2    |
| <input type="checkbox"/> | SP_PIR_KEYWORDS       | <a href="#">dna-directed rna polymerase</a>                           | <a href="#">RT</a>     |  |          |  |  |  |  | 10    | 2.2E-3  | 3.0E-2    |
| <input type="checkbox"/> | KEGG_PATHWAY          | <a href="#">RNA polymerase</a>                                        | <a href="#">RT</a>     |  |          |  |  |  |  | 6     | 7.4E-2  | 5.4E-1    |
|                          | Annotation Cluster 48 |                                                                       | Enrichment Score: 2.94 |  | <b>G</b> |  |  |  |  | Count | P_Value | Benjamini |
| <input type="checkbox"/> | GOTERM_CC_ALL         | <a href="#">kinetochore</a>                                           | <a href="#">RT</a>     |  |          |  |  |  |  | 12    | 2.2E-6  | 3.7E-5    |
| <input type="checkbox"/> | GOTERM_CC_ALL         | <a href="#">condensed chromosome kinetochore</a>                      | <a href="#">RT</a>     |  |          |  |  |  |  | 4     | 1.9E-2  | 1.6E-1    |
| <input type="checkbox"/> | GOTERM_CC_ALL         | <a href="#">condensed chromosome, pericentric region</a>              | <a href="#">RT</a>     |  |          |  |  |  |  | 4     | 3.9E-2  | 2.8E-1    |
|                          | Annotation Cluster 49 |                                                                       | Enrichment Score: 2.85 |  | <b>G</b> |  |  |  |  | Count | P_Value | Benjamini |
| <input type="checkbox"/> | SP_PIR_KEYWORDS       | <a href="#">proteasome</a>                                            | <a href="#">RT</a>     |  |          |  |  |  |  | 15    | 2.1E-4  | 3.8E-3    |
| <input type="checkbox"/> | KEGG_PATHWAY          | <a href="#">Proteasome</a>                                            | <a href="#">RT</a>     |  |          |  |  |  |  | 10    | 1.9E-3  | 4.0E-2    |
| <input type="checkbox"/> | GOTERM_CC_ALL         | <a href="#">proteasome complex (sensu Eukaryota)</a>                  | <a href="#">RT</a>     |  |          |  |  |  |  | 9     | 7.0E-3  | 6.7E-2    |



| Annotation Cluster 50    |                 | Enrichment Score: 2.77                                                     | G                  |    | Count | P_Value | Benjamini |
|--------------------------|-----------------|----------------------------------------------------------------------------|--------------------|---------------------------------------------------------------------------------------|-------|---------|-----------|
| <input type="checkbox"/> | GOTERM_BP_ALL   | <a href="#">cell cycle checkpoint</a>                                      | <a href="#">RT</a> |      | 12    | 4.2E-4  | 1.9E-2    |
| <input type="checkbox"/> | GOTERM_BP_ALL   | <a href="#">regulation of mitosis</a>                                      | <a href="#">RT</a> |      | 13    | 4.3E-4  | 1.9E-2    |
| <input type="checkbox"/> | GOTERM_BP_ALL   | <a href="#">spindle checkpoint</a>                                         | <a href="#">RT</a> |      | 5     | 1.9E-3  | 6.8E-2    |
| <input type="checkbox"/> | GOTERM_BP_ALL   | <a href="#">mitotic cell cycle checkpoint</a>                              | <a href="#">RT</a> |      | 8     | 3.5E-3  | 1.1E-1    |
| <input type="checkbox"/> | GOTERM_BP_ALL   | <a href="#">mitotic cell cycle spindle assembly checkpoint</a>             | <a href="#">RT</a> |      | 4     | 1.2E-2  | 3.0E-1    |
| Annotation Cluster 51    |                 | Enrichment Score: 2.73                                                     | G                  |    | Count | P_Value | Benjamini |
| <input type="checkbox"/> | INTERPRO        | <a href="#">Phosphoribosyltransferase</a>                                  | <a href="#">RT</a> |      | 8     | 8.1E-6  | 7.8E-3    |
| <input type="checkbox"/> | GOTERM_BP_ALL   | <a href="#">nucleoside monophosphate biosynthetic process</a>              | <a href="#">RT</a> |      | 10    | 9.8E-6  | 7.1E-4    |
| <input type="checkbox"/> | GOTERM_BP_ALL   | <a href="#">nucleoside monophosphate metabolic process</a>                 | <a href="#">RT</a> |      | 10    | 1.7E-5  | 1.2E-3    |
| <input type="checkbox"/> | GOTERM_BP_ALL   | <a href="#">ribonucleoside monophosphate biosynthetic process</a>          | <a href="#">RT</a> |      | 9     | 3.1E-5  | 1.9E-3    |
| <input type="checkbox"/> | GOTERM_BP_ALL   | <a href="#">ribonucleoside monophosphate metabolic process</a>             | <a href="#">RT</a> |      | 9     | 5.4E-5  | 3.1E-3    |
| <input type="checkbox"/> | SP_PIR_KEYWORDS | <a href="#">nucleotide biosynthesis</a>                                    | <a href="#">RT</a> |      | 6     | 5.8E-4  | 9.5E-3    |
| <input type="checkbox"/> | INTERPRO        | <a href="#">Phosphoribosyl pyrophosphate synthetase</a>                    | <a href="#">RT</a> |      | 3     | 3.9E-2  | 9.4E-1    |
| <input type="checkbox"/> | GOTERM_MF_ALL   | <a href="#">lipoate-protein liqase activity</a>                            | <a href="#">RT</a> |      | 3     | 6.6E-2  | 7.6E-1    |
| <input type="checkbox"/> | INTERPRO        | <a href="#">Ribose-phosphate pyrophosphokinase</a>                         | <a href="#">RT</a> |      | 3     | 8.7E-2  | 9.9E-1    |
| <input type="checkbox"/> | GOTERM_MF_ALL   | <a href="#">ribose phosphate diphosphokinase activity</a>                  | <a href="#">RT</a> |      | 3     | 1.2E-1  | 9.1E-1    |
| <input type="checkbox"/> | GOTERM_MF_ALL   | <a href="#">diphosphotransferase activity</a>                              | <a href="#">RT</a> |      | 3     | 1.5E-1  | 9.4E-1    |
| <input type="checkbox"/> | GOTERM_MF_ALL   | <a href="#">carbohydrate kinase activity</a>                               | <a href="#">RT</a> |      | 5     | 2.8E-1  | 9.9E-1    |
| Annotation Cluster 52    |                 | Enrichment Score: 2.73                                                     | G                  |    | Count | P_Value | Benjamini |
| <input type="checkbox"/> | GOTERM_BP_ALL   | <a href="#">negative regulation of DNA metabolic process</a>               | <a href="#">RT</a> |      | 8     | 1.7E-4  | 8.9E-3    |
| <input type="checkbox"/> | GOTERM_BP_ALL   | <a href="#">negative regulation of DNA replication</a>                     | <a href="#">RT</a> |      | 6     | 5.8E-4  | 2.4E-2    |
| <input type="checkbox"/> | GOTERM_BP_ALL   | <a href="#">regulation of DNA replication</a>                              | <a href="#">RT</a> |      | 7     | 1.4E-3  | 5.1E-2    |
| <input type="checkbox"/> | GOTERM_BP_ALL   | <a href="#">regulation of DNA metabolic process</a>                        | <a href="#">RT</a> |     | 9     | 2.2E-3  | 7.4E-2    |
| <input type="checkbox"/> | GOTERM_BP_ALL   | <a href="#">DNA integrity checkpoint</a>                                   | <a href="#">RT</a> |    | 6     | 7.2E-2  | 7.7E-1    |
| Annotation Cluster 53    |                 | Enrichment Score: 2.67                                                     | G                  |  | Count | P_Value | Benjamini |
| <input type="checkbox"/> | GOTERM_CC_ALL   | <a href="#">outer membrane</a>                                             | <a href="#">RT</a> |    | 21    | 1.6E-5  | 2.4E-4    |
| <input type="checkbox"/> | SP_PIR_KEYWORDS | <a href="#">nuclear pore complex</a>                                       | <a href="#">RT</a> |    | 11    | 2.3E-5  | 4.7E-4    |
| <input type="checkbox"/> | SP_PIR_KEYWORDS | <a href="#">porin</a>                                                      | <a href="#">RT</a> |    | 12    | 2.6E-5  | 5.2E-4    |
| <input type="checkbox"/> | GOTERM_MF_ALL   | <a href="#">porin activity</a>                                             | <a href="#">RT</a> |    | 10    | 3.6E-4  | 2.0E-2    |
| <input type="checkbox"/> | GOTERM_MF_ALL   | <a href="#">nucleocytoplasmic transporter activity</a>                     | <a href="#">RT</a> |    | 5     | 8.5E-3  | 2.7E-1    |
| <input type="checkbox"/> | GOTERM_MF_ALL   | <a href="#">wide pore channel activity</a>                                 | <a href="#">RT</a> |    | 10    | 1.4E-2  | 3.8E-1    |
| <input type="checkbox"/> | GOTERM_MF_ALL   | <a href="#">passive transmembrane transporter activity</a>                 | <a href="#">RT</a> |    | 14    | 1.0E0   | 1.0E0     |
| <input type="checkbox"/> | GOTERM_MF_ALL   | <a href="#">channel activity</a>                                           | <a href="#">RT</a> |    | 14    | 1.0E0   | 1.0E0     |
| Annotation Cluster 54    |                 | Enrichment Score: 2.66                                                     | G                  |  | Count | P_Value | Benjamini |
| <input type="checkbox"/> | GOTERM_MF_ALL   | <a href="#">DNA helicase activity</a>                                      | <a href="#">RT</a> |    | 11    | 1.2E-5  | 1.0E-3    |
| <input type="checkbox"/> | GOTERM_MF_ALL   | <a href="#">ATP-dependent DNA helicase activity</a>                        | <a href="#">RT</a> |    | 7     | 4.9E-4  | 2.6E-2    |
| <input type="checkbox"/> | SMART           | <a href="#">DEXDc2</a>                                                     | <a href="#">RT</a> |    | 4     | 2.6E-3  | 1.2E-1    |
| <input type="checkbox"/> | SMART           | <a href="#">HELICc2</a>                                                    | <a href="#">RT</a> |    | 4     | 2.6E-3  | 1.2E-1    |
| <input type="checkbox"/> | INTERPRO        | <a href="#">Helicase, superfamily 1 and 2, ATP-binding, DinG/Rad3-type</a> | <a href="#">RT</a> |    | 4     | 5.5E-3  | 5.5E-1    |
| <input type="checkbox"/> | INTERPRO        | <a href="#">Helicase, ATP-dependent, c2 type</a>                           | <a href="#">RT</a> |    | 4     | 5.5E-3  | 5.5E-1    |
| <input type="checkbox"/> | INTERPRO        | <a href="#">DNA helicase (DNA repair), Rad3 type</a>                       | <a href="#">RT</a> |    | 4     | 5.5E-3  | 5.5E-1    |
| <input type="checkbox"/> | INTERPRO        | <a href="#">DEAD2</a>                                                      | <a href="#">RT</a> |    | 4     | 5.5E-3  | 5.5E-1    |
| <input type="checkbox"/> | COG_ONTOLOGY    | <a href="#">Transcription / DNA replication, recombination, and repair</a> | <a href="#">RT</a> |    | 5     | 3.1E-2  | 5.6E-1    |
| Annotation Cluster 55    |                 | Enrichment Score: 2.51                                                     | G                  |  | Count | P_Value | Benjamini |
| <input type="checkbox"/> | GOTERM_BP_ALL   | <a href="#">interphase of mitotic cell cycle</a>                           | <a href="#">RT</a> |    | 16    | 2.0E-4  | 9.9E-3    |
| <input type="checkbox"/> | GOTERM_BP_ALL   | <a href="#">interphase</a>                                                 | <a href="#">RT</a> |    | 16    | 2.0E-4  | 9.9E-3    |

|                          |                 |                                                                                                                              |                    |  |       |         |           |
|--------------------------|-----------------|------------------------------------------------------------------------------------------------------------------------------|--------------------|--|-------|---------|-----------|
| <input type="checkbox"/> | GOTERM_BP_ALL   | <a href="#">S phase</a>                                                                                                      | <a href="#">RT</a> |  | 7     | 3.3E-4  | 1.5E-2    |
| <input type="checkbox"/> | GOTERM_BP_ALL   | <a href="#">S phase of mitotic cell cycle</a>                                                                                | <a href="#">RT</a> |  | 7     | 3.3E-4  | 1.5E-2    |
| <input type="checkbox"/> | GOTERM_BP_ALL   | <a href="#">regulation of progression through mitotic cell cycle</a>                                                         | <a href="#">RT</a> |  | 7     | 2.2E-2  | 4.5E-1    |
| <input type="checkbox"/> | GOTERM_BP_ALL   | <a href="#">regulation of progression through S phase</a>                                                                    | <a href="#">RT</a> |  | 3     | 1.6E-1  | 9.4E-1    |
| <input type="checkbox"/> | GOTERM_BP_ALL   | <a href="#">regulation of S phase of mitotic cell cycle</a>                                                                  | <a href="#">RT</a> |  | 3     | 1.6E-1  | 9.4E-1    |
| Annotation Cluster 56    |                 | Enrichment Score: 2.5                                                                                                        | <b>G</b>           |  | Count | P_Value | Benjamini |
| <input type="checkbox"/> | INTERPRO        | <a href="#">WHEP-TRS</a>                                                                                                     | <a href="#">RT</a> |  | 5     | 2.5E-4  | 8.2E-2    |
| <input type="checkbox"/> | INTERPRO        | <a href="#">Aminoacyl-tRNA synthetase, class II</a>                                                                          | <a href="#">RT</a> |  | 6     | 3.3E-3  | 4.7E-1    |
| <input type="checkbox"/> | INTERPRO        | <a href="#">Anticodon-binding</a>                                                                                            | <a href="#">RT</a> |  | 5     | 4.8E-3  | 5.6E-1    |
| <input type="checkbox"/> | INTERPRO        | <a href="#">Aminoacyl-tRNA synthetase, class II (G, H, P and S)</a>                                                          | <a href="#">RT</a> |  | 4     | 2.5E-2  | 9.1E-1    |
| Annotation Cluster 57    |                 | Enrichment Score: 2.47                                                                                                       | <b>G</b>           |  | Count | P_Value | Benjamini |
| <input type="checkbox"/> | INTERPRO        | <a href="#">WHEP-TRS</a>                                                                                                     | <a href="#">RT</a> |  | 5     | 2.5E-4  | 8.2E-2    |
| <input type="checkbox"/> | INTERPRO        | <a href="#">S15/NS1, RNA-binding</a>                                                                                         | <a href="#">RT</a> |  | 4     | 2.4E-3  | 3.9E-1    |
| <input type="checkbox"/> | INTERPRO        | <a href="#">Aminoacyl-tRNA synthetase, class I</a>                                                                           | <a href="#">RT</a> |  | 8     | 8.0E-3  | 6.2E-1    |
| <input type="checkbox"/> | INTERPRO        | <a href="#">Rossmann-like alpha/beta/alpha sandwich fold</a>                                                                 | <a href="#">RT</a> |  | 7     | 2.9E-2  | 9.3E-1    |
| Annotation Cluster 58    |                 | Enrichment Score: 2.46                                                                                                       | <b>G</b>           |  | Count | P_Value | Benjamini |
| <input type="checkbox"/> | UP_SEQ_FEATURE  | short sequence motif:Histidine box-1                                                                                         | <a href="#">RT</a> |  | 4     | 3.5E-3  | 9.5E-1    |
| <input type="checkbox"/> | UP_SEQ_FEATURE  | short sequence motif:Histidine box-2                                                                                         | <a href="#">RT</a> |  | 4     | 3.5E-3  | 9.5E-1    |
| <input type="checkbox"/> | UP_SEQ_FEATURE  | short sequence motif:Histidine box-3                                                                                         | <a href="#">RT</a> |  | 4     | 3.5E-3  | 9.5E-1    |
| Annotation Cluster 59    |                 | Enrichment Score: 2.45                                                                                                       | <b>G</b>           |  | Count | P_Value | Benjamini |
| <input type="checkbox"/> | SMART           | <a href="#">Sm</a>                                                                                                           | <a href="#">RT</a> |  | 7     | 1.1E-3  | 6.9E-2    |
| <input type="checkbox"/> | INTERPRO        | <a href="#">Like-Sm ribonucleoprotein, eukaryotic and archaea-type, core</a>                                                 | <a href="#">RT</a> |  | 7     | 4.0E-3  | 5.2E-1    |
| <input type="checkbox"/> | INTERPRO        | <a href="#">Like-Sm ribonucleoprotein, core</a>                                                                              | <a href="#">RT</a> |  | 7     | 5.3E-3  | 5.9E-1    |
| <input type="checkbox"/> | GOTERM_BP_ALL   | <a href="#">mRNA catabolic process</a>                                                                                       | <a href="#">RT</a> |  | 9     | 6.8E-3  | 1.8E-1    |
| Annotation Cluster 60    |                 | Enrichment Score: 2.45                                                                                                       | <b>G</b>           |  | Count | P_Value | Benjamini |
| <input type="checkbox"/> | GOTERM_BP_ALL   | <a href="#">double-strand break repair</a>                                                                                   | <a href="#">RT</a> |  | 9     | 1.2E-3  | 4.7E-2    |
| <input type="checkbox"/> | GOTERM_BP_ALL   | <a href="#">double-strand break repair via homologous recombination</a>                                                      | <a href="#">RT</a> |  | 5     | 6.0E-3  | 1.7E-1    |
| <input type="checkbox"/> | GOTERM_BP_ALL   | <a href="#">recombinational repair</a>                                                                                       | <a href="#">RT</a> |  | 5     | 6.0E-3  | 1.7E-1    |
| Annotation Cluster 61    |                 | Enrichment Score: 2.44                                                                                                       | <b>G</b>           |  | Count | P_Value | Benjamini |
| <input type="checkbox"/> | GOTERM_MF_ALL   | <a href="#">endonuclease activity</a>                                                                                        | <a href="#">RT</a> |  | 20    | 1.9E-4  | 1.1E-2    |
| <input type="checkbox"/> | GOTERM_MF_ALL   | <a href="#">tRNA-specific ribonuclease activity</a>                                                                          | <a href="#">RT</a> |  | 6     | 1.6E-3  | 7.6E-2    |
| <input type="checkbox"/> | GOTERM_MF_ALL   | <a href="#">ribonuclease activity</a>                                                                                        | <a href="#">RT</a> |  | 14    | 2.8E-3  | 1.2E-1    |
| <input type="checkbox"/> | GOTERM_MF_ALL   | <a href="#">endonuclease activity, active with either ribo- or deoxyribonucleic acids and producing 5'-phosphomonoesters</a> | <a href="#">RT</a> |  | 8     | 5.0E-3  | 1.9E-1    |
| <input type="checkbox"/> | GOTERM_MF_ALL   | <a href="#">ribonuclease P activity</a>                                                                                      | <a href="#">RT</a> |  | 5     | 5.5E-3  | 2.0E-1    |
| <input type="checkbox"/> | GOTERM_MF_ALL   | <a href="#">endoribonuclease activity, producing 5'-phosphomonoesters</a>                                                    | <a href="#">RT</a> |  | 7     | 1.3E-2  | 3.7E-1    |
| <input type="checkbox"/> | GOTERM_MF_ALL   | <a href="#">endoribonuclease activity</a>                                                                                    | <a href="#">RT</a> |  | 9     | 3.0E-2  | 5.7E-1    |
| Annotation Cluster 62    |                 | Enrichment Score: 2.41                                                                                                       | <b>G</b>           |  | Count | P_Value | Benjamini |
| <input type="checkbox"/> | GOTERM_BP_ALL   | <a href="#">centrosome organization and biogenesis</a>                                                                       | <a href="#">RT</a> |  | 7     | 9.1E-4  | 3.5E-2    |
| <input type="checkbox"/> | GOTERM_BP_ALL   | <a href="#">microtubule organizing center organization and biogenesis</a>                                                    | <a href="#">RT</a> |  | 7     | 1.4E-3  | 5.1E-2    |
| <input type="checkbox"/> | GOTERM_BP_ALL   | <a href="#">centrosome cycle</a>                                                                                             | <a href="#">RT</a> |  | 6     | 1.8E-3  | 6.6E-2    |
| <input type="checkbox"/> | GOTERM_BP_ALL   | <a href="#">centrosome duplication</a>                                                                                       | <a href="#">RT</a> |  | 3     | 9.8E-2  | 8.5E-1    |
| Annotation Cluster 63    |                 | Enrichment Score: 2.39                                                                                                       | <b>G</b>           |  | Count | P_Value | Benjamini |
| <input type="checkbox"/> | SP_PIR_KEYWORDS | <a href="#">lipid synthesis</a>                                                                                              | <a href="#">RT</a> |  | 28    | 1.2E-9  | 4.6E-8    |
| <input type="checkbox"/> | SP_PIR_KEYWORDS | <a href="#">fatty acid biosynthesis</a>                                                                                      | <a href="#">RT</a> |  | 12    | 6.8E-4  | 1.1E-2    |
| <input type="checkbox"/> | GOTERM_BP_ALL   | <a href="#">fatty acid biosynthetic process</a>                                                                              | <a href="#">RT</a> |  | 13    | 1.7E-2  | 3.8E-1    |
| <input type="checkbox"/> | KEGG_PATHWAY    | <a href="#">Polyunsaturated fatty acid biosynthesis</a>                                                                      | <a href="#">RT</a> |  | 6     | 1.9E-2  | 2.5E-1    |
| <input type="checkbox"/> | GOTERM_BP_ALL   | <a href="#">organic acid biosynthetic process</a>                                                                            | <a href="#">RT</a> |  | 13    | 2.6E-2  | 4.9E-1    |

| <input type="checkbox"/> | Category        | Term                                                                                                | RT       | Bar | Count | P_Value | Benjamini |
|--------------------------|-----------------|-----------------------------------------------------------------------------------------------------|----------|-----|-------|---------|-----------|
| <input type="checkbox"/> | GOTERM_BP_ALL   | <a href="#">carboxylic acid biosynthetic process</a>                                                | RT       |     | 13    | 2.6E-2  | 4.9E-1    |
| <input type="checkbox"/> | GOTERM_BP_ALL   | <a href="#">monocarboxylic acid metabolic process</a>                                               | RT       |     | 21    | 6.1E-1  | 1.0E0     |
| <input type="checkbox"/> | GOTERM_BP_ALL   | <a href="#">fatty acid metabolic process</a>                                                        | RT       |     | 15    | 6.3E-1  | 1.0E0     |
| Annotation Cluster 64    |                 | Enrichment Score: 2.27                                                                              | <b>G</b> |     | Count | P_Value | Benjamini |
| <input type="checkbox"/> | BIOCARTA        | <a href="#">Cyclins and Cell Cycle Regulation</a>                                                   | RT       |     | 11    | 2.0E-4  | 2.9E-2    |
| <input type="checkbox"/> | BIOCARTA        | <a href="#">E2F1 Destruction Pathway</a>                                                            | RT       |     | 6     | 1.3E-3  | 1.1E-1    |
| <input type="checkbox"/> | BIOCARTA        | <a href="#">Regulation of p27 Phosphorylation during Cell Cycle Progression</a>                     | RT       |     | 6     | 3.9E-3  | 1.5E-1    |
| <input type="checkbox"/> | BIOCARTA        | <a href="#">Cell Cycle</a>                                                                          | RT       |     | 9     | 6.1E-3  | 2.0E-1    |
| <input type="checkbox"/> | BIOCARTA        | <a href="#">Cyclin E Destruction Pathway</a>                                                        | RT       |     | 5     | 6.8E-3  | 1.9E-1    |
| <input type="checkbox"/> | BIOCARTA        | <a href="#">Influence of Ras and Rho proteins on G1 to S Transition</a>                             | RT       |     | 8     | 2.7E-2  | 4.0E-1    |
| <input type="checkbox"/> | BIOCARTA        | <a href="#">p53 Signaling Pathway</a>                                                               | RT       |     | 5     | 1.1E-1  | 7.6E-1    |
| Annotation Cluster 65    |                 | Enrichment Score: 2.13                                                                              | <b>G</b> |     | Count | P_Value | Benjamini |
| <input type="checkbox"/> | GOTERM_BP_ALL   | <a href="#">nucleobase, nucleoside, nucleotide and nucleic acid metabolic process</a>               | RT       |     | 452   | 6.9E-25 | 4.4E-22   |
| <input type="checkbox"/> | GOTERM_BP_ALL   | <a href="#">gene expression</a>                                                                     | RT       |     | 356   | 2.1E-8  | 2.3E-6    |
| <input type="checkbox"/> | GOTERM_MF_ALL   | <a href="#">nucleic acid binding</a>                                                                | RT       |     | 340   | 1.4E-6  | 1.6E-4    |
| <input type="checkbox"/> | GOTERM_BP_ALL   | <a href="#">RNA metabolic process</a>                                                               | RT       |     | 285   | 7.9E-5  | 4.5E-3    |
| <input type="checkbox"/> | GOTERM_MF_ALL   | <a href="#">DNA binding</a>                                                                         | RT       |     | 184   | 2.2E-1  | 9.8E-1    |
| <input type="checkbox"/> | SP_PIR_KEYWORDS | <a href="#">Transcription</a>                                                                       | RT       |     | 109   | 8.7E-1  | 1.0E0     |
| <input type="checkbox"/> | SP_PIR_KEYWORDS | <a href="#">Transcription regulation</a>                                                            | RT       |     | 96    | 9.9E-1  | 1.0E0     |
| <input type="checkbox"/> | GOTERM_BP_ALL   | <a href="#">transcription</a>                                                                       | RT       |     | 177   | 1.0E0   | 1.0E0     |
| <input type="checkbox"/> | GOTERM_BP_ALL   | <a href="#">regulation of metabolic process</a>                                                     | RT       |     | 192   | 1.0E0   | 1.0E0     |
| <input type="checkbox"/> | GOTERM_BP_ALL   | <a href="#">regulation of nucleobase, nucleoside, nucleotide and nucleic acid metabolic process</a> | RT       |     | 166   | 1.0E0   | 1.0E0     |
| <input type="checkbox"/> | GOTERM_BP_ALL   | <a href="#">regulation of cellular process</a>                                                      | RT       |     | 290   | 1.0E0   | 1.0E0     |
| <input type="checkbox"/> | GOTERM_BP_ALL   | <a href="#">RNA biosynthetic process</a>                                                            | RT       |     | 156   | 1.0E0   | 1.0E0     |
| <input type="checkbox"/> | GOTERM_BP_ALL   | <a href="#">transcription, DNA-dependent</a>                                                        | RT       |     | 154   | 1.0E0   | 1.0E0     |
| <input type="checkbox"/> | GOTERM_BP_ALL   | <a href="#">regulation of cellular metabolic process</a>                                            | RT       |     | 181   | 1.0E0   | 1.0E0     |
| <input type="checkbox"/> | GOTERM_BP_ALL   | <a href="#">regulation of gene expression</a>                                                       | RT       |     | 172   | 1.0E0   | 1.0E0     |
| <input type="checkbox"/> | GOTERM_BP_ALL   | <a href="#">regulation of transcription</a>                                                         | RT       |     | 158   | 1.0E0   | 1.0E0     |
| <input type="checkbox"/> | GOTERM_BP_ALL   | <a href="#">regulation of biological process</a>                                                    | RT       |     | 314   | 1.0E0   | 1.0E0     |
| <input type="checkbox"/> | GOTERM_BP_ALL   | <a href="#">regulation of transcription, DNA-dependent</a>                                          | RT       |     | 145   | 1.0E0   | 1.0E0     |
| <input type="checkbox"/> | GOTERM_BP_ALL   | <a href="#">biological regulation</a>                                                               | RT       |     | 344   | 1.0E0   | 1.0E0     |
| <input type="checkbox"/> | GOTERM_MF_ALL   | <a href="#">transcription regulator activity</a>                                                    | RT       |     | 72    | 1.0E0   | 1.0E0     |
| Annotation Cluster 66    |                 | Enrichment Score: 2.07                                                                              | <b>G</b> |     | Count | P_Value | Benjamini |
| <input type="checkbox"/> | INTERPRO        | <a href="#">RecA bacterial DNA recombination</a>                                                    | RT       |     | 5     | 1.5E-3  | 3.3E-1    |
| <input type="checkbox"/> | INTERPRO        | <a href="#">Rad51, C-terminal</a>                                                                   | RT       |     | 4     | 5.5E-3  | 5.5E-1    |
| <input type="checkbox"/> | PIRSUPERFAMILY  | PIRSF005856:DNA repair and recombination protein, Rad51 type                                        | RT       |     | 3     | 7.6E-2  | 1.0E0     |
| Annotation Cluster 67    |                 | Enrichment Score: 2.02                                                                              | <b>G</b> |     | Count | P_Value | Benjamini |
| <input type="checkbox"/> | GOTERM_BP_ALL   | <a href="#">establishment of organelle localization</a>                                             | RT       |     | 9     | 2.8E-3  | 9.1E-2    |
| <input type="checkbox"/> | GOTERM_BP_ALL   | <a href="#">establishment of chromosome localization</a>                                            | RT       |     | 4     | 1.2E-2  | 3.0E-1    |
| <input type="checkbox"/> | GOTERM_BP_ALL   | <a href="#">chromosome localization</a>                                                             | RT       |     | 4     | 1.2E-2  | 3.0E-1    |
| <input type="checkbox"/> | GOTERM_BP_ALL   | <a href="#">organelle localization</a>                                                              | RT       |     | 9     | 1.9E-2  | 4.1E-1    |
| Annotation Cluster 68    |                 | Enrichment Score: 2.01                                                                              | <b>G</b> |     | Count | P_Value | Benjamini |
| <input type="checkbox"/> | INTERPRO        | <a href="#">Phosphoribosyltransferase</a>                                                           | RT       |     | 8     | 8.1E-6  | 7.8E-3    |
| <input type="checkbox"/> | GOTERM_BP_ALL   | <a href="#">nucleoside metabolic process</a>                                                        | RT       |     | 12    | 1.8E-5  | 1.2E-3    |
| <input type="checkbox"/> | GOTERM_BP_ALL   | <a href="#">purine base metabolic process</a>                                                       | RT       |     | 6     | 5.8E-4  | 2.4E-2    |
| <input type="checkbox"/> | INTERPRO        | <a href="#">Purine/pyrimidine phosphoribosyl transferase</a>                                        | RT       |     | 5     | 7.0E-4  | 1.9E-1    |
| <input type="checkbox"/> | GOTERM_BP_ALL   | <a href="#">ribonucleoside metabolic process</a>                                                    | RT       |     | 5     | 6.0E-3  | 1.7E-1    |

|                          |                 |                                                                                                                             |                    |  |       |         |           |
|--------------------------|-----------------|-----------------------------------------------------------------------------------------------------------------------------|--------------------|--|-------|---------|-----------|
| <input type="checkbox"/> | GOTERM_MF_ALL   | <a href="#">transferase activity, transferring pentosyl groups</a>                                                          | <a href="#">RT</a> |  | 10    | 1.0E-2  | 3.1E-1    |
| <input type="checkbox"/> | GOTERM_BP_ALL   | <a href="#">purine ribonucleoside metabolic process</a>                                                                     | <a href="#">RT</a> |  | 4     | 1.2E-2  | 3.0E-1    |
| <input type="checkbox"/> | GOTERM_BP_ALL   | <a href="#">adenine salvage</a>                                                                                             | <a href="#">RT</a> |  | 3     | 2.4E-2  | 4.6E-1    |
| <input type="checkbox"/> | GOTERM_BP_ALL   | <a href="#">adenine metabolic process</a>                                                                                   | <a href="#">RT</a> |  | 3     | 2.4E-2  | 4.6E-1    |
| <input type="checkbox"/> | GOTERM_BP_ALL   | <a href="#">purine base salvage</a>                                                                                         | <a href="#">RT</a> |  | 3     | 2.4E-2  | 4.6E-1    |
| <input type="checkbox"/> | GOTERM_BP_ALL   | <a href="#">purine nucleoside metabolic process</a>                                                                         | <a href="#">RT</a> |  | 4     | 3.0E-2  | 5.2E-1    |
| <input type="checkbox"/> | GOTERM_BP_ALL   | <a href="#">purine ribonucleoside salvage</a>                                                                               | <a href="#">RT</a> |  | 3     | 4.4E-2  | 6.3E-1    |
| <input type="checkbox"/> | GOTERM_BP_ALL   | <a href="#">purine salvage</a>                                                                                              | <a href="#">RT</a> |  | 3     | 4.4E-2  | 6.3E-1    |
| <input type="checkbox"/> | GOTERM_BP_ALL   | <a href="#">nucleoside salvage</a>                                                                                          | <a href="#">RT</a> |  | 3     | 4.4E-2  | 6.3E-1    |
| <input type="checkbox"/> | SP_PIR_KEYWORDS | <a href="#">purine salvage</a>                                                                                              | <a href="#">RT</a> |  | 3     | 4.4E-2  | 3.5E-1    |
| <input type="checkbox"/> | SP_PIR_KEYWORDS | <a href="#">salvage pathway</a>                                                                                             | <a href="#">RT</a> |  | 3     | 6.9E-2  | 4.8E-1    |
| <input type="checkbox"/> | SP_PIR_KEYWORDS | <a href="#">pentosyltransferase</a>                                                                                         | <a href="#">RT</a> |  | 3     | 6.9E-2  | 4.8E-1    |
| <input type="checkbox"/> | GOTERM_BP_ALL   | <a href="#">metabolic compound salvage</a>                                                                                  | <a href="#">RT</a> |  | 3     | 1.3E-1  | 9.1E-1    |
| <input type="checkbox"/> | GOTERM_BP_ALL   | <a href="#">grooming behavior</a>                                                                                           | <a href="#">RT</a> |  | 3     | 1.3E-1  | 9.1E-1    |
| Annotation Cluster 69    |                 | Enrichment Score: 1.98                                                                                                      | <b>G</b>           |  | Count | P_Value | Benjamini |
| <input type="checkbox"/> | GOTERM_CC_ALL   | <a href="#">exosome (RNase complex)</a>                                                                                     | <a href="#">RT</a> |  | 8     | 1.4E-4  | 1.9E-3    |
| <input type="checkbox"/> | GOTERM_MF_ALL   | <a href="#">3'-5' exonuclease activity</a>                                                                                  | <a href="#">RT</a> |  | 10    | 1.9E-4  | 1.2E-2    |
| <input type="checkbox"/> | SP_PIR_KEYWORDS | <a href="#">Exosome</a>                                                                                                     | <a href="#">RT</a> |  | 6     | 5.8E-4  | 9.5E-3    |
| <input type="checkbox"/> | INTERPRO        | <a href="#">Exoribonuclease, phosphorolytic domain 1</a>                                                                    | <a href="#">RT</a> |  | 4     | 1.7E-2  | 8.4E-1    |
| <input type="checkbox"/> | GOTERM_MF_ALL   | <a href="#">3'-5'-exoribonuclease activity</a>                                                                              | <a href="#">RT</a> |  | 4     | 5.2E-2  | 7.3E-1    |
| <input type="checkbox"/> | GOTERM_MF_ALL   | <a href="#">exonuclease activity, active with either ribo- or deoxyribonucleic acids and producing 5'-phosphomonoesters</a> | <a href="#">RT</a> |  | 5     | 8.2E-2  | 8.2E-1    |
| <input type="checkbox"/> | INTERPRO        | <a href="#">Exoribonuclease, phosphorolytic domain 2</a>                                                                    | <a href="#">RT</a> |  | 3     | 8.7E-2  | 9.9E-1    |
| <input type="checkbox"/> | GOTERM_MF_ALL   | <a href="#">exoribonuclease activity</a>                                                                                    | <a href="#">RT</a> |  | 4     | 1.2E-1  | 9.2E-1    |
| <input type="checkbox"/> | GOTERM_MF_ALL   | <a href="#">exoribonuclease activity, producing 5'-phosphomonoesters</a>                                                    | <a href="#">RT</a> |  | 4     | 1.2E-1  | 9.2E-1    |
| Annotation Cluster 70    |                 | Enrichment Score: 1.89                                                                                                      | <b>G</b>           |  | Count | P_Value | Benjamini |
| <input type="checkbox"/> | GOTERM_MF_ALL   | <a href="#">nucleobase, nucleoside, nucleotide kinase activity</a>                                                          | <a href="#">RT</a> |  | 11    | 1.7E-3  | 8.0E-2    |
| <input type="checkbox"/> | GOTERM_MF_ALL   | <a href="#">phosphotransferase activity, phosphate group as acceptor</a>                                                    | <a href="#">RT</a> |  | 8     | 1.7E-2  | 4.4E-1    |
| <input type="checkbox"/> | GOTERM_MF_ALL   | <a href="#">nucleotide kinase activity</a>                                                                                  | <a href="#">RT</a> |  | 5     | 7.0E-2  | 7.7E-1    |
| Annotation Cluster 71    |                 | Enrichment Score: 1.88                                                                                                      | <b>G</b>           |  | Count | P_Value | Benjamini |
| <input type="checkbox"/> | SMART           | <a href="#">S1</a>                                                                                                          | <a href="#">RT</a> |  | 5     | 6.2E-3  | 2.3E-1    |
| <input type="checkbox"/> | INTERPRO        | <a href="#">S1, RNA binding</a>                                                                                             | <a href="#">RT</a> |  | 5     | 1.5E-2  | 8.2E-1    |
| <input type="checkbox"/> | UP_SEQ_FEATURE  | domain:S1 motif                                                                                                             | <a href="#">RT</a> |  | 4     | 2.4E-2  | 1.0E0     |
| Annotation Cluster 72    |                 | Enrichment Score: 1.88                                                                                                      | <b>G</b>           |  | Count | P_Value | Benjamini |
| <input type="checkbox"/> | UP_SEQ_FEATURE  | compositionally biased region:Arg/Ser-rich (RS domain)                                                                      | <a href="#">RT</a> |  | 6     | 8.1E-4  | 5.9E-1    |
| <input type="checkbox"/> | GOTERM_BP_ALL   | <a href="#">spliceosome assembly</a>                                                                                        | <a href="#">RT</a> |  | 9     | 1.2E-3  | 4.7E-2    |
| <input type="checkbox"/> | GOTERM_BP_ALL   | <a href="#">mRNA splice site selection</a>                                                                                  | <a href="#">RT</a> |  | 5     | 4.2E-2  | 6.3E-1    |
| <input type="checkbox"/> | UP_SEQ_FEATURE  | compositionally biased region:Gly-rich (hinge region)                                                                       | <a href="#">RT</a> |  | 3     | 7.9E-2  | 1.0E0     |
| <input type="checkbox"/> | GOTERM_MF_ALL   | <a href="#">RNA splicing factor activity, transesterification mechanism</a>                                                 | <a href="#">RT</a> |  | 4     | 1.2E-1  | 9.2E-1    |
| Annotation Cluster 73    |                 | Enrichment Score: 1.81                                                                                                      | <b>G</b>           |  | Count | P_Value | Benjamini |
| <input type="checkbox"/> | GOTERM_BP_ALL   | <a href="#">nuclear import</a>                                                                                              | <a href="#">RT</a> |  | 19    | 4.0E-5  | 2.4E-3    |
| <input type="checkbox"/> | GOTERM_BP_ALL   | <a href="#">protein import into nucleus</a>                                                                                 | <a href="#">RT</a> |  | 18    | 9.6E-5  | 5.3E-3    |
| <input type="checkbox"/> | INTERPRO        | <a href="#">Importin-beta, N-terminal</a>                                                                                   | <a href="#">RT</a> |  | 8     | 1.2E-4  | 5.9E-2    |
| <input type="checkbox"/> | GOTERM_BP_ALL   | <a href="#">protein import into nucleus, docking</a>                                                                        | <a href="#">RT</a> |  | 8     | 1.7E-4  | 8.9E-3    |
| <input type="checkbox"/> | INTERPRO        | <a href="#">Armadillo-like helical</a>                                                                                      | <a href="#">RT</a> |  | 21    | 2.7E-4  | 8.4E-2    |
| <input type="checkbox"/> | UP_SEQ_FEATURE  | domain:Importin N-terminal                                                                                                  | <a href="#">RT</a> |  | 7     | 4.8E-4  | 4.3E-1    |
| <input type="checkbox"/> | GOTERM_BP_ALL   | <a href="#">cellular protein complex assembly</a>                                                                           | <a href="#">RT</a> |  | 11    | 6.4E-3  | 1.8E-1    |
| <input type="checkbox"/> | GOTERM_BP_ALL   | <a href="#">ribosomal protein import into nucleus</a>                                                                       | <a href="#">RT</a> |  | 3     | 6.9E-2  | 7.6E-1    |

|                          |                 |                                                                                                           |                    |  |       |         |           |
|--------------------------|-----------------|-----------------------------------------------------------------------------------------------------------|--------------------|--|-------|---------|-----------|
| <input type="checkbox"/> | UP_SEQ_FEATURE  | repeat:HEAT 6                                                                                             | <a href="#">RT</a> |  | 5     | 7.8E-2  | 1.0E0     |
| <input type="checkbox"/> | UP_SEQ_FEATURE  | repeat:HEAT 5                                                                                             | <a href="#">RT</a> |  | 5     | 1.3E-1  | 1.0E0     |
| <input type="checkbox"/> | UP_SEQ_FEATURE  | repeat:HEAT 4                                                                                             | <a href="#">RT</a> |  | 5     | 1.6E-1  | 1.0E0     |
| <input type="checkbox"/> | UP_SEQ_FEATURE  | repeat:HEAT 3                                                                                             | <a href="#">RT</a> |  | 5     | 1.8E-1  | 1.0E0     |
| <input type="checkbox"/> | UP_SEQ_FEATURE  | repeat:HEAT 1                                                                                             | <a href="#">RT</a> |  | 5     | 2.0E-1  | 1.0E0     |
| <input type="checkbox"/> | UP_SEQ_FEATURE  | repeat:HEAT 2                                                                                             | <a href="#">RT</a> |  | 5     | 2.0E-1  | 1.0E0     |
| <input type="checkbox"/> | COG_ONTOLOGY    | <a href="#">Intracellular trafficking and secretion</a>                                                   | <a href="#">RT</a> |  | 9     | 3.4E-1  | 9.6E-1    |
| <input type="checkbox"/> | UP_SEQ_FEATURE  | repeat:HEAT 8                                                                                             | <a href="#">RT</a> |  | 3     | 3.7E-1  | 1.0E0     |
| <input type="checkbox"/> | UP_SEQ_FEATURE  | repeat:HEAT 7                                                                                             | <a href="#">RT</a> |  | 3     | 4.4E-1  | 1.0E0     |
| <input type="checkbox"/> | GOTERM_BP_ALL   | <a href="#">protein complex assembly</a>                                                                  | <a href="#">RT</a> |  | 15    | 7.0E-1  | 1.0E0     |
| Annotation Cluster 74    |                 | Enrichment Score: 1.81                                                                                    | <b>G</b>           |  | Count | P_Value | Benjamini |
| <input type="checkbox"/> | SP_PIR_KEYWORDS | <a href="#">inner membrane</a>                                                                            | <a href="#">RT</a> |  | 18    | 1.2E-3  | 1.7E-2    |
| <input type="checkbox"/> | GOTERM_BP_ALL   | <a href="#">mitochondrion organization and biogenesis</a>                                                 | <a href="#">RT</a> |  | 17    | 1.8E-3  | 6.5E-2    |
| <input type="checkbox"/> | GOTERM_BP_ALL   | <a href="#">mitochondrial membrane organization and biogenesis</a>                                        | <a href="#">RT</a> |  | 8     | 2.6E-3  | 8.6E-2    |
| <input type="checkbox"/> | GOTERM_BP_ALL   | <a href="#">inner mitochondrial membrane organization and biogenesis</a>                                  | <a href="#">RT</a> |  | 5     | 3.6E-3  | 1.1E-1    |
| <input type="checkbox"/> | GOTERM_CC_ALL   | <a href="#">mitochondrial intermembrane space</a>                                                         | <a href="#">RT</a> |  | 6     | 5.5E-3  | 5.6E-2    |
| <input type="checkbox"/> | GOTERM_BP_ALL   | <a href="#">protein import into mitochondrion</a>                                                         | <a href="#">RT</a> |  | 5     | 9.3E-3  | 2.4E-1    |
| <input type="checkbox"/> | GOTERM_CC_ALL   | <a href="#">organelle envelope lumen</a>                                                                  | <a href="#">RT</a> |  | 7     | 1.6E-2  | 1.4E-1    |
| <input type="checkbox"/> | INTERPRO        | <a href="#">Zinc finger, Tim10/DDP-type</a>                                                               | <a href="#">RT</a> |  | 4     | 1.7E-2  | 8.4E-1    |
| <input type="checkbox"/> | GOTERM_CC_ALL   | <a href="#">mitochondrial intermembrane space protein transporter complex</a>                             | <a href="#">RT</a> |  | 4     | 1.9E-2  | 1.6E-1    |
| <input type="checkbox"/> | GOTERM_BP_ALL   | <a href="#">mitochondrial transport</a>                                                                   | <a href="#">RT</a> |  | 8     | 2.0E-2  | 4.1E-1    |
| <input type="checkbox"/> | GOTERM_BP_ALL   | <a href="#">protein import into mitochondrial inner membrane</a>                                          | <a href="#">RT</a> |  | 4     | 2.0E-2  | 4.2E-1    |
| <input type="checkbox"/> | GOTERM_CC_ALL   | <a href="#">mitochondrial inner membrane presequence translocase complex</a>                              | <a href="#">RT</a> |  | 4     | 2.8E-2  | 2.1E-1    |
| <input type="checkbox"/> | GOTERM_MF_ALL   | <a href="#">macromolecule transmembrane transporter activity</a>                                          | <a href="#">RT</a> |  | 5     | 3.0E-2  | 5.7E-1    |
| <input type="checkbox"/> | GOTERM_MF_ALL   | <a href="#">P-P-bond-hydrolysis-driven protein transmembrane transporter activity</a>                     | <a href="#">RT</a> |  | 5     | 3.0E-2  | 5.7E-1    |
| <input type="checkbox"/> | GOTERM_CC_ALL   | <a href="#">mitochondrial membrane part</a>                                                               | <a href="#">RT</a> |  | 10    | 5.2E-2  | 3.4E-1    |
| <input type="checkbox"/> | GOTERM_BP_ALL   | <a href="#">protein targeting to mitochondrion</a>                                                        | <a href="#">RT</a> |  | 4     | 7.2E-2  | 7.7E-1    |
| <input type="checkbox"/> | UP_SEQ_FEATURE  | short sequence motif:Twin CX3C motif                                                                      | <a href="#">RT</a> |  | 3     | 7.9E-2  | 1.0E0     |
| <input type="checkbox"/> | GOTERM_MF_ALL   | <a href="#">protein transmembrane transporter activity</a>                                                | <a href="#">RT</a> |  | 5     | 1.4E-1  | 9.4E-1    |
| Annotation Cluster 75    |                 | Enrichment Score: 1.8                                                                                     | <b>G</b>           |  | Count | P_Value | Benjamini |
| <input type="checkbox"/> | KEGG_PATHWAY    | <a href="#">One carbon pool by folate</a>                                                                 | <a href="#">RT</a> |  | 10    | 4.0E-6  | 1.4E-4    |
| <input type="checkbox"/> | GOTERM_BP_ALL   | <a href="#">nitrogen compound biosynthetic process</a>                                                    | <a href="#">RT</a> |  | 24    | 1.5E-5  | 1.1E-3    |
| <input type="checkbox"/> | GOTERM_BP_ALL   | <a href="#">amine biosynthetic process</a>                                                                | <a href="#">RT</a> |  | 20    | 2.1E-5  | 1.3E-3    |
| <input type="checkbox"/> | GOTERM_BP_ALL   | <a href="#">amino acid biosynthetic process</a>                                                           | <a href="#">RT</a> |  | 13    | 8.2E-4  | 3.2E-2    |
| <input type="checkbox"/> | SP_PIR_KEYWORDS | <a href="#">one-carbon metabolism</a>                                                                     | <a href="#">RT</a> |  | 7     | 9.1E-4  | 1.3E-2    |
| <input type="checkbox"/> | GOTERM_MF_ALL   | <a href="#">oxidoreductase activity, acting on the CH-NH group of donors, NAD or NADP as acceptor</a>     | <a href="#">RT</a> |  | 7     | 1.2E-3  | 5.9E-2    |
| <input type="checkbox"/> | SP_PIR_KEYWORDS | <a href="#">amino-acid biosynthesis</a>                                                                   | <a href="#">RT</a> |  | 8     | 1.9E-3  | 2.6E-2    |
| <input type="checkbox"/> | GOTERM_MF_ALL   | <a href="#">hydrolase activity, acting on carbon-nitrogen (but not peptide) bonds, in cyclic amidines</a> | <a href="#">RT</a> |  | 8     | 6.3E-3  | 2.2E-1    |
| <input type="checkbox"/> | GOTERM_MF_ALL   | <a href="#">oxidoreductase activity, acting on the CH-NH group of donors</a>                              | <a href="#">RT</a> |  | 7     | 2.0E-2  | 4.7E-1    |
| <input type="checkbox"/> | INTERPRO        | <a href="#">Tetrahydrofolate dehydrogenase/cyclohydrolase</a>                                             | <a href="#">RT</a> |  | 3     | 2.1E-2  | 8.7E-1    |
| <input type="checkbox"/> | GOTERM_MF_ALL   | <a href="#">methylenetetrahydrofolate dehydrogenase activity</a>                                          | <a href="#">RT</a> |  | 3     | 2.2E-2  | 5.0E-1    |
| <input type="checkbox"/> | GOTERM_MF_ALL   | <a href="#">methylenetetrahydrofolate dehydrogenase (NADP+) activity</a>                                  | <a href="#">RT</a> |  | 3     | 2.2E-2  | 5.0E-1    |
| <input type="checkbox"/> | GOTERM_MF_ALL   | <a href="#">methylenetetrahydrofolate cyclohydrolase</a>                                                  | <a href="#">RT</a> |  | 3     | 2.2E-2  | 5.0E-1    |

| <input type="checkbox"/> |                       | <a href="#">activity</a>                                              | <a href="#">RT</a> |  |  |       |         |           |  |
|--------------------------|-----------------------|-----------------------------------------------------------------------|--------------------|--|--|-------|---------|-----------|--|
| <input type="checkbox"/> | GOTERM_BP_ALL         | <a href="#">folic acid and derivative biosynthetic process</a>        | <a href="#">RT</a> |  |  | 4     | 3.0E-2  | 5.2E-1    |  |
| <input type="checkbox"/> | GOTERM_BP_ALL         | <a href="#">methionine metabolic process</a>                          | <a href="#">RT</a> |  |  | 4     | 4.2E-2  | 6.2E-1    |  |
| <input type="checkbox"/> | GOTERM_BP_ALL         | <a href="#">methionine biosynthetic process</a>                       | <a href="#">RT</a> |  |  | 4     | 4.2E-2  | 6.2E-1    |  |
| <input type="checkbox"/> | GOTERM_BP_ALL         | <a href="#">histidine biosynthetic process</a>                        | <a href="#">RT</a> |  |  | 3     | 4.4E-2  | 6.3E-1    |  |
| <input type="checkbox"/> | GOTERM_BP_ALL         | <a href="#">histidine family amino acid biosynthetic process</a>      | <a href="#">RT</a> |  |  | 3     | 4.4E-2  | 6.3E-1    |  |
| <input type="checkbox"/> | KEGG_PATHWAY          | <a href="#">Glyoxylate and dicarboxylate metabolism</a>               | <a href="#">RT</a> |  |  | 5     | 4.9E-2  | 4.1E-1    |  |
| <input type="checkbox"/> | GOTERM_BP_ALL         | <a href="#">aspartate family amino acid biosynthetic process</a>      | <a href="#">RT</a> |  |  | 5     | 5.2E-2  | 6.7E-1    |  |
| <input type="checkbox"/> | GOTERM_BP_ALL         | <a href="#">aspartate family amino acid metabolic process</a>         | <a href="#">RT</a> |  |  | 5     | 7.5E-2  | 7.8E-1    |  |
| <input type="checkbox"/> | GOTERM_BP_ALL         | <a href="#">sulfur amino acid metabolic process</a>                   | <a href="#">RT</a> |  |  | 5     | 8.9E-2  | 8.3E-1    |  |
| <input type="checkbox"/> | GOTERM_BP_ALL         | <a href="#">sulfur amino acid biosynthetic process</a>                | <a href="#">RT</a> |  |  | 4     | 1.1E-1  | 8.8E-1    |  |
| <input type="checkbox"/> | GOTERM_BP_ALL         | <a href="#">folic acid and derivative metabolic process</a>           | <a href="#">RT</a> |  |  | 4     | 1.1E-1  | 8.8E-1    |  |
| <input type="checkbox"/> | GOTERM_BP_ALL         | <a href="#">histidine metabolic process</a>                           | <a href="#">RT</a> |  |  | 3     | 4.0E-1  | 1.0E0     |  |
| <input type="checkbox"/> | GOTERM_BP_ALL         | <a href="#">histidine family amino acid metabolic process</a>         | <a href="#">RT</a> |  |  | 3     | 4.0E-1  | 1.0E0     |  |
| <input type="checkbox"/> | COG_ONTOLOGY          | <a href="#">Coenzyme metabolism</a>                                   | <a href="#">RT</a> |  |  | 6     | 4.6E-1  | 9.8E-1    |  |
| <input type="checkbox"/> | GOTERM_BP_ALL         | <a href="#">sulfur metabolic process</a>                              | <a href="#">RT</a> |  |  | 7     | 7.6E-1  | 1.0E0     |  |
| <input type="checkbox"/> | GOTERM_BP_ALL         | <a href="#">sulfur compound biosynthetic process</a>                  | <a href="#">RT</a> |  |  | 4     | 7.7E-1  | 1.0E0     |  |
|                          | Annotation Cluster 76 | Enrichment Score: 1.75                                                | <b>G</b>           |  |  | Count | P_Value | Benjamini |  |
| <input type="checkbox"/> | GOTERM_BP_ALL         | <a href="#">macromolecule metabolic process</a>                       | <a href="#">RT</a> |  |  | 655   | 1.5E-12 | 2.5E-10   |  |
| <input type="checkbox"/> | GOTERM_BP_ALL         | <a href="#">cellular protein metabolic process</a>                    | <a href="#">RT</a> |  |  | 311   | 1.8E-3  | 6.5E-2    |  |
| <input type="checkbox"/> | GOTERM_BP_ALL         | <a href="#">cellular macromolecule metabolic process</a>              | <a href="#">RT</a> |  |  | 311   | 4.4E-3  | 1.3E-1    |  |
| <input type="checkbox"/> | GOTERM_BP_ALL         | <a href="#">protein metabolic process</a>                             | <a href="#">RT</a> |  |  | 318   | 6.8E-3  | 1.9E-1    |  |
| <input type="checkbox"/> | GOTERM_BP_ALL         | <a href="#">biopolymer modification</a>                               | <a href="#">RT</a> |  |  | 139   | 8.9E-1  | 1.0E0     |  |
| <input type="checkbox"/> | GOTERM_BP_ALL         | <a href="#">phosphorus metabolic process</a>                          | <a href="#">RT</a> |  |  | 68    | 9.3E-1  | 1.0E0     |  |
| <input type="checkbox"/> | GOTERM_BP_ALL         | <a href="#">phosphate metabolic process</a>                           | <a href="#">RT</a> |  |  | 68    | 9.3E-1  | 1.0E0     |  |
| <input type="checkbox"/> | GOTERM_BP_ALL         | <a href="#">phosphorylation</a>                                       | <a href="#">RT</a> |  |  | 54    | 9.6E-1  | 1.0E0     |  |
| <input type="checkbox"/> | GOTERM_BP_ALL         | <a href="#">protein modification process</a>                          | <a href="#">RT</a> |  |  | 126   | 9.8E-1  | 1.0E0     |  |
| <input type="checkbox"/> | GOTERM_BP_ALL         | <a href="#">post-translational protein modification</a>               | <a href="#">RT</a> |  |  | 105   | 9.9E-1  | 1.0E0     |  |
| <input type="checkbox"/> | GOTERM_BP_ALL         | <a href="#">protein amino acid phosphorylation</a>                    | <a href="#">RT</a> |  |  | 43    | 9.9E-1  | 1.0E0     |  |
|                          | Annotation Cluster 77 | Enrichment Score: 1.75                                                | <b>G</b>           |  |  | Count | P_Value | Benjamini |  |
| <input type="checkbox"/> | GOTERM_BP_ALL         | <a href="#">L-serine metabolic process</a>                            | <a href="#">RT</a> |  |  | 5     | 1.9E-3  | 6.8E-2    |  |
| <input type="checkbox"/> | GOTERM_BP_ALL         | <a href="#">serine family amino acid metabolic process</a>            | <a href="#">RT</a> |  |  | 7     | 5.5E-3  | 1.6E-1    |  |
| <input type="checkbox"/> | GOTERM_BP_ALL         | <a href="#">serine family amino acid biosynthetic process</a>         | <a href="#">RT</a> |  |  | 4     | 2.0E-2  | 4.2E-1    |  |
| <input type="checkbox"/> | SP_PIR_KEYWORDS       | <a href="#">serine biosynthesis</a>                                   | <a href="#">RT</a> |  |  | 3     | 2.4E-2  | 2.2E-1    |  |
| <input type="checkbox"/> | GOTERM_BP_ALL         | <a href="#">L-serine biosynthetic process</a>                         | <a href="#">RT</a> |  |  | 3     | 4.4E-2  | 6.3E-1    |  |
| <input type="checkbox"/> | KEGG_PATHWAY          | <a href="#">Glycine, serine and threonine metabolism</a>              | <a href="#">RT</a> |  |  | 8     | 1.5E-1  | 6.9E-1    |  |
|                          | Annotation Cluster 78 | Enrichment Score: 1.74                                                | <b>G</b>           |  |  | Count | P_Value | Benjamini |  |
| <input type="checkbox"/> | GOTERM_BP_ALL         | <a href="#">cell cycle checkpoint</a>                                 | <a href="#">RT</a> |  |  | 12    | 4.2E-4  | 1.9E-2    |  |
| <input type="checkbox"/> | BIOCARTA              | <a href="#">Role of BRCA1, BRCA2 and ATR in Cancer Susceptibility</a> | <a href="#">RT</a> |  |  | 8     | 2.6E-3  | 1.2E-1    |  |
| <input type="checkbox"/> | GOTERM_BP_ALL         | <a href="#">DNA integrity checkpoint</a>                              | <a href="#">RT</a> |  |  | 6     | 7.2E-2  | 7.7E-1    |  |
| <input type="checkbox"/> | GOTERM_BP_ALL         | <a href="#">DNA damage response, signal transduction</a>              | <a href="#">RT</a> |  |  | 8     | 7.6E-2  | 7.8E-1    |  |
| <input type="checkbox"/> | GOTERM_BP_ALL         | <a href="#">DNA damage checkpoint</a>                                 | <a href="#">RT</a> |  |  | 4     | 3.3E-1  | 9.9E-1    |  |
|                          | Annotation Cluster 79 | Enrichment Score: 1.72                                                | <b>G</b>           |  |  | Count | P_Value | Benjamini |  |
| <input type="checkbox"/> | GOTERM_MF_ALL         | <a href="#">pseudouridylate synthase activity</a>                     | <a href="#">RT</a> |  |  | 7     | 1.5E-4  | 9.7E-3    |  |
| <input type="checkbox"/> | GOTERM_BP_ALL         | <a href="#">RNA modification</a>                                      | <a href="#">RT</a> |  |  | 9     | 9.2E-4  | 3.6E-2    |  |
| <input type="checkbox"/> | GOTERM_BP_ALL         | <a href="#">tRNA modification</a>                                     | <a href="#">RT</a> |  |  | 5     | 6.0E-3  | 1.7E-1    |  |
| <input type="checkbox"/> | GOTERM_BP_ALL         | <a href="#">pseudouridine synthesis</a>                               | <a href="#">RT</a> |  |  | 5     | 9.3E-3  | 2.4E-1    |  |

| <input type="checkbox"/> | GOTERM_BP_ALL         | <a href="#">tRNA pseudouridine synthesis</a>                                                | <a href="#">RT</a> |  |  |  |  | 3     | 6.9E-2  | 7.6E-1    |
|--------------------------|-----------------------|---------------------------------------------------------------------------------------------|--------------------|--|--|--|--|-------|---------|-----------|
| <input type="checkbox"/> | GOTERM_MF_ALL         | <a href="#">intramolecular transferase activity</a>                                         | <a href="#">RT</a> |  |  |  |  | 6     | 2.0E-1  | 9.7E-1    |
| <input type="checkbox"/> | GOTERM_MF_ALL         | <a href="#">pseudouridine synthase activity</a>                                             | <a href="#">RT</a> |  |  |  |  | 4     | 3.4E-1  | 1.0E0     |
| <input type="checkbox"/> | GOTERM_MF_ALL         | <a href="#">tRNA-pseudouridine synthase activity</a>                                        | <a href="#">RT</a> |  |  |  |  | 3     | 5.1E-1  | 1.0E0     |
|                          | Annotation Cluster 80 | Enrichment Score: 1.61                                                                      | <b>G</b>           |  |  |  |  | Count | P_Value | Benjamini |
| <input type="checkbox"/> | PIR_SUPERFAMILY       | PIRSF002306:tubulin                                                                         | <a href="#">RT</a> |  |  |  |  | 8     | 9.0E-4  | 6.0E-1    |
| <input type="checkbox"/> | INTERPRO              | <a href="#">Tubulin/FtsZ, C-terminal</a>                                                    | <a href="#">RT</a> |  |  |  |  | 6     | 6.6E-3  | 5.8E-1    |
| <input type="checkbox"/> | INTERPRO              | <a href="#">Tubulin/FtsZ, GTPase</a>                                                        | <a href="#">RT</a> |  |  |  |  | 6     | 6.6E-3  | 5.8E-1    |
| <input type="checkbox"/> | GOTERM_BP_ALL         | <a href="#">protein polymerization</a>                                                      | <a href="#">RT</a> |  |  |  |  | 11    | 1.0E-2  | 2.6E-1    |
| <input type="checkbox"/> | COG_ONTOLOGY          | <a href="#">Cytoskeleton</a>                                                                | <a href="#">RT</a> |  |  |  |  | 10    | 5.0E-2  | 6.4E-1    |
| <input type="checkbox"/> | INTERPRO              | <a href="#">Alpha tubulin</a>                                                               | <a href="#">RT</a> |  |  |  |  | 3     | 8.7E-2  | 9.9E-1    |
| <input type="checkbox"/> | INTERPRO              | <a href="#">Tubulin</a>                                                                     | <a href="#">RT</a> |  |  |  |  | 5     | 1.0E-1  | 1.0E0     |
| <input type="checkbox"/> | GOTERM_MF_ALL         | <a href="#">structural constituent of cytoskeleton</a>                                      | <a href="#">RT</a> |  |  |  |  | 7     | 7.5E-1  | 1.0E0     |
|                          | Annotation Cluster 81 | Enrichment Score: 1.6                                                                       | <b>G</b>           |  |  |  |  | Count | P_Value | Benjamini |
| <input type="checkbox"/> | SMART                 | <a href="#">TPR</a>                                                                         | <a href="#">RT</a> |  |  |  |  | 20    | 3.9E-5  | 2.9E-3    |
| <input type="checkbox"/> | INTERPRO              | <a href="#">Tetratricopeptide-like helical</a>                                              | <a href="#">RT</a> |  |  |  |  | 21    | 9.9E-4  | 2.4E-1    |
| <input type="checkbox"/> | INTERPRO              | <a href="#">Tetratricopeptide region</a>                                                    | <a href="#">RT</a> |  |  |  |  | 19    | 1.5E-3  | 3.2E-1    |
| <input type="checkbox"/> | INTERPRO              | <a href="#">Tetratricopeptide TPR-1</a>                                                     | <a href="#">RT</a> |  |  |  |  | 16    | 2.3E-3  | 4.0E-1    |
| <input type="checkbox"/> | SP_PIR_KEYWORDS       | <a href="#">TPR repeat</a>                                                                  | <a href="#">RT</a> |  |  |  |  | 20    | 6.6E-3  | 7.8E-2    |
| <input type="checkbox"/> | UP_SEQ_FEATURE        | repeat:TPR 3                                                                                | <a href="#">RT</a> |  |  |  |  | 11    | 3.1E-2  | 1.0E0     |
| <input type="checkbox"/> | UP_SEQ_FEATURE        | repeat:TPR 1                                                                                | <a href="#">RT</a> |  |  |  |  | 11    | 4.8E-2  | 1.0E0     |
| <input type="checkbox"/> | UP_SEQ_FEATURE        | repeat:TPR 2                                                                                | <a href="#">RT</a> |  |  |  |  | 11    | 4.8E-2  | 1.0E0     |
| <input type="checkbox"/> | UP_SEQ_FEATURE        | repeat:TPR 9                                                                                | <a href="#">RT</a> |  |  |  |  | 4     | 6.7E-2  | 1.0E0     |
| <input type="checkbox"/> | INTERPRO              | <a href="#">Tetratricopeptide TPR2</a>                                                      | <a href="#">RT</a> |  |  |  |  | 8     | 1.4E-1  | 1.0E0     |
| <input type="checkbox"/> | UP_SEQ_FEATURE        | repeat:TPR 7                                                                                | <a href="#">RT</a> |  |  |  |  | 5     | 2.5E-1  | 1.0E0     |
| <input type="checkbox"/> | UP_SEQ_FEATURE        | repeat:TPR 4                                                                                | <a href="#">RT</a> |  |  |  |  | 6     | 2.8E-1  | 1.0E0     |
| <input type="checkbox"/> | UP_SEQ_FEATURE        | repeat:TPR 8                                                                                | <a href="#">RT</a> |  |  |  |  | 4     | 2.8E-1  | 1.0E0     |
| <input type="checkbox"/> | UP_SEQ_FEATURE        | repeat:TPR 6                                                                                | <a href="#">RT</a> |  |  |  |  | 5     | 2.9E-1  | 1.0E0     |
| <input type="checkbox"/> | UP_SEQ_FEATURE        | repeat:TPR 5                                                                                | <a href="#">RT</a> |  |  |  |  | 5     | 3.2E-1  | 1.0E0     |
|                          | Annotation Cluster 82 | Enrichment Score: 1.59                                                                      | <b>G</b>           |  |  |  |  | Count | P_Value | Benjamini |
| <input type="checkbox"/> | UP_SEQ_FEATURE        | short sequence motif:"KMSKS" region                                                         | <a href="#">RT</a> |  |  |  |  | 4     | 2.4E-2  | 1.0E0     |
| <input type="checkbox"/> | UP_SEQ_FEATURE        | short sequence motif:"HIGH" region                                                          | <a href="#">RT</a> |  |  |  |  | 4     | 2.4E-2  | 1.0E0     |
| <input type="checkbox"/> | INTERPRO              | <a href="#">Rossmann-like alpha/beta/alpha sandwich fold</a>                                | <a href="#">RT</a> |  |  |  |  | 7     | 2.9E-2  | 9.3E-1    |
|                          | Annotation Cluster 83 | Enrichment Score: 1.56                                                                      | <b>G</b>           |  |  |  |  | Count | P_Value | Benjamini |
| <input type="checkbox"/> | SMART                 | <a href="#">BRCT</a>                                                                        | <a href="#">RT</a> |  |  |  |  | 6     | 1.3E-2  | 4.1E-1    |
| <input type="checkbox"/> | INTERPRO              | <a href="#">BRCT</a>                                                                        | <a href="#">RT</a> |  |  |  |  | 6     | 3.5E-2  | 9.6E-1    |
| <input type="checkbox"/> | UP_SEQ_FEATURE        | domain:BRCT 1                                                                               | <a href="#">RT</a> |  |  |  |  | 4     | 3.6E-2  | 1.0E0     |
| <input type="checkbox"/> | UP_SEQ_FEATURE        | domain:BRCT 2                                                                               | <a href="#">RT</a> |  |  |  |  | 4     | 3.6E-2  | 1.0E0     |
|                          | Annotation Cluster 84 | Enrichment Score: 1.55                                                                      | <b>G</b>           |  |  |  |  | Count | P_Value | Benjamini |
| <input type="checkbox"/> | SP_PIR_KEYWORDS       | <a href="#">Isoprene biosynthesis</a>                                                       | <a href="#">RT</a> |  |  |  |  | 5     | 3.6E-3  | 4.4E-2    |
| <input type="checkbox"/> | GOTERM_MF_ALL         | <a href="#">prenyltransferase activity</a>                                                  | <a href="#">RT</a> |  |  |  |  | 6     | 4.8E-2  | 7.1E-1    |
| <input type="checkbox"/> | GOTERM_MF_ALL         | <a href="#">transferase activity, transferring alkyl or aryl (other than methyl) groups</a> | <a href="#">RT</a> |  |  |  |  | 9     | 1.3E-1  | 9.2E-1    |
|                          | Annotation Cluster 85 | Enrichment Score: 1.53                                                                      | <b>G</b>           |  |  |  |  | Count | P_Value | Benjamini |
| <input type="checkbox"/> | GOTERM_BP_ALL         | <a href="#">polyamine biosynthetic process</a>                                              | <a href="#">RT</a> |  |  |  |  | 6     | 1.1E-4  | 6.1E-3    |
| <input type="checkbox"/> | SP_PIR_KEYWORDS       | <a href="#">Polyamine biosynthesis</a>                                                      | <a href="#">RT</a> |  |  |  |  | 5     | 9.0E-4  | 1.3E-2    |
| <input type="checkbox"/> | KEGG_PATHWAY          | <a href="#">Methionine metabolism</a>                                                       | <a href="#">RT</a> |  |  |  |  | 7     | 9.2E-3  | 1.4E-1    |
| <input type="checkbox"/> | GOTERM_BP_ALL         | <a href="#">polyamine metabolic process</a>                                                 | <a href="#">RT</a> |  |  |  |  | 6     | 1.5E-2  | 3.5E-1    |
| <input type="checkbox"/> | GOTERM_BP_ALL         | <a href="#">spermidine biosynthetic process</a>                                             | <a href="#">RT</a> |  |  |  |  | 3     | 2.4E-2  | 4.6E-1    |
| <input type="checkbox"/> | SP_PIR_KEYWORDS       | <a href="#">spermidine biosynthesis</a>                                                     | <a href="#">RT</a> |  |  |  |  | 3     | 2.4E-2  | 2.2E-1    |

|                          |                 |                                                                          |                    |  |       |         |           |
|--------------------------|-----------------|--------------------------------------------------------------------------|--------------------|--|-------|---------|-----------|
| <input type="checkbox"/> | GOTERM_MF_ALL   | <a href="#">carboxy-lyase activity</a>                                   | <a href="#">RT</a> |  | 8     | 2.4E-2  | 5.0E-1    |
| <input type="checkbox"/> | GOTERM_BP_ALL   | <a href="#">biogenic amine biosynthetic process</a>                      | <a href="#">RT</a> |  | 7     | 2.7E-2  | 5.0E-1    |
| <input type="checkbox"/> | INTERPRO        | <a href="#">Ornithine decarboxylase</a>                                  | <a href="#">RT</a> |  | 3     | 3.9E-2  | 9.4E-1    |
| <input type="checkbox"/> | GOTERM_MF_ALL   | <a href="#">carbon-carbon lyase activity</a>                             | <a href="#">RT</a> |  | 9     | 4.8E-2  | 7.1E-1    |
| <input type="checkbox"/> | GOTERM_BP_ALL   | <a href="#">amino acid derivative biosynthetic process</a>               | <a href="#">RT</a> |  | 7     | 5.8E-2  | 7.1E-1    |
| <input type="checkbox"/> | SP_PIR_KEYWORDS | <a href="#">decarboxylase</a>                                            | <a href="#">RT</a> |  | 6     | 6.2E-2  | 4.5E-1    |
| <input type="checkbox"/> | GOTERM_BP_ALL   | <a href="#">spermidine metabolic process</a>                             | <a href="#">RT</a> |  | 3     | 6.9E-2  | 7.6E-1    |
| <input type="checkbox"/> | SP_PIR_KEYWORDS | <a href="#">lyase</a>                                                    | <a href="#">RT</a> |  | 17    | 7.1E-2  | 4.8E-1    |
| <input type="checkbox"/> | INTERPRO        | <a href="#">Orn/DAP/Arg decarboxylase 2</a>                              | <a href="#">RT</a> |  | 3     | 1.2E-1  | 1.0E0     |
| <input type="checkbox"/> | GOTERM_BP_ALL   | <a href="#">amino acid derivative metabolic process</a>                  | <a href="#">RT</a> |  | 13    | 1.4E-1  | 9.2E-1    |
| <input type="checkbox"/> | GOTERM_BP_ALL   | <a href="#">biogenic amine metabolic process</a>                         | <a href="#">RT</a> |  | 10    | 2.7E-1  | 9.9E-1    |
| <input type="checkbox"/> | KEGG_PATHWAY    | <a href="#">Urea cycle and metabolism of amino groups</a>                | <a href="#">RT</a> |  | 5     | 3.7E-1  | 9.1E-1    |
| Annotation Cluster 86    |                 | Enrichment Score: 1.53                                                   | <b>G</b>           |  | Count | P_Value | Benjamini |
| <input type="checkbox"/> | GOTERM_BP_ALL   | <a href="#">double-strand break repair</a>                               | <a href="#">RT</a> |  | 9     | 1.2E-3  | 4.7E-2    |
| <input type="checkbox"/> | GOTERM_BP_ALL   | <a href="#">double-strand break repair via nonhomologous end joining</a> | <a href="#">RT</a> |  | 3     | 1.3E-1  | 9.1E-1    |
| <input type="checkbox"/> | GOTERM_BP_ALL   | <a href="#">non-recombinational repair</a>                               | <a href="#">RT</a> |  | 3     | 1.6E-1  | 9.4E-1    |
| Annotation Cluster 87    |                 | Enrichment Score: 1.53                                                   | <b>G</b>           |  | Count | P_Value | Benjamini |
| <input type="checkbox"/> | SP_PIR_KEYWORDS | <a href="#">DNA-directed DNA polymerase</a>                              | <a href="#">RT</a> |  | 9     | 2.2E-4  | 3.9E-3    |
| <input type="checkbox"/> | INTERPRO        | <a href="#">DNA polymerase, B region</a>                                 | <a href="#">RT</a> |  | 3     | 3.9E-2  | 9.4E-1    |
| <input type="checkbox"/> | INTERPRO        | <a href="#">DNA polymerase B, exonuclease</a>                            | <a href="#">RT</a> |  | 3     | 3.9E-2  | 9.4E-1    |
| <input type="checkbox"/> | SMART           | <a href="#">POLBc</a>                                                    | <a href="#">RT</a> |  | 3     | 5.5E-2  | 7.6E-1    |
| <input type="checkbox"/> | INTERPRO        | <a href="#">DNA-directed DNA polymerase B</a>                            | <a href="#">RT</a> |  | 3     | 8.7E-2  | 9.9E-1    |
| <input type="checkbox"/> | UP_SEQ_FEATURE  | zinc finger region:C4-type                                               | <a href="#">RT</a> |  | 6     | 4.2E-1  | 1.0E0     |
| Annotation Cluster 88    |                 | Enrichment Score: 1.52                                                   | <b>G</b>           |  | Count | P_Value | Benjamini |
| <input type="checkbox"/> | SP_PIR_KEYWORDS | <a href="#">molecular chaperone</a>                                      | <a href="#">RT</a> |  | 11    | 8.7E-7  | 2.0E-5    |
| <input type="checkbox"/> | INTERPRO        | <a href="#">Heat shock protein Hsp70</a>                                 | <a href="#">RT</a> |  | 6     | 2.2E-3  | 4.1E-1    |
| <input type="checkbox"/> | SP_PIR_KEYWORDS | <a href="#">stress response</a>                                          | <a href="#">RT</a> |  | 12    | 2.4E-3  | 3.1E-2    |
| <input type="checkbox"/> | GOTERM_MF_ALL   | <a href="#">TPR domain binding</a>                                       | <a href="#">RT</a> |  | 4     | 2.6E-3  | 1.1E-1    |
| <input type="checkbox"/> | PIR_SUPERFAMILY | PIRSF002583:heat shock protein, HSP90/HTPG types                         | <a href="#">RT</a> |  | 4     | 3.3E-3  | 9.2E-1    |
| <input type="checkbox"/> | SMART           | <a href="#">HATPase_c</a>                                                | <a href="#">RT</a> |  | 6     | 5.3E-3  | 2.2E-1    |
| <input type="checkbox"/> | INTERPRO        | <a href="#">Heat shock protein Hsp90</a>                                 | <a href="#">RT</a> |  | 4     | 1.0E-2  | 7.0E-1    |
| <input type="checkbox"/> | INTERPRO        | <a href="#">Heat shock protein 70</a>                                    | <a href="#">RT</a> |  | 5     | 2.0E-2  | 8.7E-1    |
| <input type="checkbox"/> | SP_PIR_KEYWORDS | <a href="#">estrogen-induced protein</a>                                 | <a href="#">RT</a> |  | 3     | 2.4E-2  | 2.2E-1    |
| <input type="checkbox"/> | SP_PIR_KEYWORDS | <a href="#">stress-induced protein</a>                                   | <a href="#">RT</a> |  | 4     | 3.0E-2  | 2.6E-1    |
| <input type="checkbox"/> | SP_PIR_KEYWORDS | <a href="#">heat shock</a>                                               | <a href="#">RT</a> |  | 4     | 3.0E-2  | 2.6E-1    |
| <input type="checkbox"/> | GOTERM_BP_ALL   | <a href="#">response to heat</a>                                         | <a href="#">RT</a> |  | 7     | 3.2E-2  | 5.4E-1    |
| <input type="checkbox"/> | INTERPRO        | <a href="#">ATP-binding region, ATPase-like</a>                          | <a href="#">RT</a> |  | 5     | 4.2E-2  | 9.6E-1    |
| <input type="checkbox"/> | GOTERM_BP_ALL   | <a href="#">response to unfolded protein</a>                             | <a href="#">RT</a> |  | 12    | 4.7E-2  | 6.5E-1    |
| <input type="checkbox"/> | GOTERM_BP_ALL   | <a href="#">response to protein stimulus</a>                             | <a href="#">RT</a> |  | 12    | 4.7E-2  | 6.5E-1    |
| <input type="checkbox"/> | PIR_SUPERFAMILY | PIRSF002581:chaperone HSP70                                              | <a href="#">RT</a> |  | 4     | 4.8E-2  | 1.0E0     |
| <input type="checkbox"/> | GOTERM_MF_ALL   | <a href="#">nitric-oxide synthase regulator activity</a>                 | <a href="#">RT</a> |  | 3     | 6.6E-2  | 7.6E-1    |
| <input type="checkbox"/> | GOTERM_BP_ALL   | <a href="#">response to temperature stimulus</a>                         | <a href="#">RT</a> |  | 8     | 9.3E-2  | 8.4E-1    |
| <input type="checkbox"/> | GOTERM_BP_ALL   | <a href="#">regulation of nitric oxide biosynthetic process</a>          | <a href="#">RT</a> |  | 4     | 1.1E-1  | 8.8E-1    |
| <input type="checkbox"/> | GOTERM_BP_ALL   | <a href="#">positive regulation of nitric oxide biosynthetic process</a> | <a href="#">RT</a> |  | 3     | 2.3E-1  | 9.8E-1    |
| <input type="checkbox"/> | GOTERM_BP_ALL   | <a href="#">response to abiotic stimulus</a>                             | <a href="#">RT</a> |  | 19    | 3.2E-1  | 9.9E-1    |
| <input type="checkbox"/> | GOTERM_BP_ALL   | <a href="#">nitric oxide metabolic process</a>                           | <a href="#">RT</a> |  | 4     | 3.8E-1  | 1.0E0     |
| <input type="checkbox"/> | GOTERM_BP_ALL   | <a href="#">nitric oxide biosynthetic process</a>                        | <a href="#">RT</a> |  | 4     | 3.8E-1  | 1.0E0     |
| <input type="checkbox"/> | KEGG_PATHWAY    | <a href="#">Antigen processing and presentation</a>                      | <a href="#">RT</a> |  | 10    | 4.4E-1  | 9.4E-1    |



| <input type="checkbox"/> | GOTERM_BP_ALL         | <a href="#">positive regulation of biosynthetic process</a>                                           | <a href="#">RT</a> |  |  |  |  | 4     | 9.6E-1  | 1.0E0     |
|--------------------------|-----------------------|-------------------------------------------------------------------------------------------------------|--------------------|--|--|--|--|-------|---------|-----------|
| <input type="checkbox"/> | GOTERM_BP_ALL         | <a href="#">response to biotic stimulus</a>                                                           | <a href="#">RT</a> |  |  |  |  | 14    | 9.8E-1  | 1.0E0     |
|                          | Annotation Cluster 89 | Enrichment Score: 1.5                                                                                 | <b>G</b>           |  |  |  |  | Count | P_Value | Benjamini |
| <input type="checkbox"/> | GOTERM_BP_ALL         | <a href="#">one-carbon compound metabolic process</a>                                                 | <a href="#">RT</a> |  |  |  |  | 24    | 4.9E-6  | 3.7E-4    |
| <input type="checkbox"/> | KEGG_PATHWAY          | <a href="#">Selenoamino acid metabolism</a>                                                           | <a href="#">RT</a> |  |  |  |  | 10    | 1.1E-3  | 2.9E-2    |
| <input type="checkbox"/> | KEGG_PATHWAY          | <a href="#">Aminophosphonate metabolism</a>                                                           | <a href="#">RT</a> |  |  |  |  | 7     | 1.8E-3  | 4.2E-2    |
| <input type="checkbox"/> | GOTERM_MF_ALL         | <a href="#">histone methyltransferase activity</a>                                                    | <a href="#">RT</a> |  |  |  |  | 8     | 7.9E-3  | 2.6E-1    |
| <input type="checkbox"/> | GOTERM_BP_ALL         | <a href="#">biopolymer methylation</a>                                                                | <a href="#">RT</a> |  |  |  |  | 12    | 8.6E-3  | 2.3E-1    |
| <input type="checkbox"/> | GOTERM_BP_ALL         | <a href="#">methylation</a>                                                                           | <a href="#">RT</a> |  |  |  |  | 12    | 1.3E-2  | 3.1E-1    |
| <input type="checkbox"/> | KEGG_PATHWAY          | <a href="#">Naphthalene and anthracene degradation</a>                                                | <a href="#">RT</a> |  |  |  |  | 6     | 1.9E-2  | 2.5E-1    |
| <input type="checkbox"/> | GOTERM_MF_ALL         | <a href="#">protein methyltransferase activity</a>                                                    | <a href="#">RT</a> |  |  |  |  | 9     | 2.0E-2  | 4.7E-1    |
| <input type="checkbox"/> | GOTERM_BP_ALL         | <a href="#">protein amino acid alkylation</a>                                                         | <a href="#">RT</a> |  |  |  |  | 8     | 3.1E-2  | 5.3E-1    |
| <input type="checkbox"/> | GOTERM_BP_ALL         | <a href="#">protein amino acid methylation</a>                                                        | <a href="#">RT</a> |  |  |  |  | 8     | 3.1E-2  | 5.3E-1    |
| <input type="checkbox"/> | GOTERM_BP_ALL         | <a href="#">peptidyl-arginine methylation</a>                                                         | <a href="#">RT</a> |  |  |  |  | 3     | 4.4E-2  | 6.3E-1    |
| <input type="checkbox"/> | GOTERM_MF_ALL         | <a href="#">N-methyltransferase activity</a>                                                          | <a href="#">RT</a> |  |  |  |  | 8     | 6.1E-2  | 7.5E-1    |
| <input type="checkbox"/> | GOTERM_MF_ALL         | <a href="#">arginine N-methyltransferase activity</a>                                                 | <a href="#">RT</a> |  |  |  |  | 3     | 6.6E-2  | 7.6E-1    |
| <input type="checkbox"/> | GOTERM_MF_ALL         | <a href="#">protein-arginine N-methyltransferase activity</a>                                         | <a href="#">RT</a> |  |  |  |  | 3     | 6.6E-2  | 7.6E-1    |
| <input type="checkbox"/> | GOTERM_MF_ALL         | <a href="#">histone-arginine N-methyltransferase activity</a>                                         | <a href="#">RT</a> |  |  |  |  | 3     | 6.6E-2  | 7.6E-1    |
| <input type="checkbox"/> | GOTERM_BP_ALL         | <a href="#">peptidyl-arginine modification</a>                                                        | <a href="#">RT</a> |  |  |  |  | 3     | 6.9E-2  | 7.6E-1    |
| <input type="checkbox"/> | PIR_SUPERFAMILY       | PIRSF037127:type 1 arginine N-methyltransferase                                                       | <a href="#">RT</a> |  |  |  |  | 3     | 7.6E-2  | 1.0E0     |
| <input type="checkbox"/> | KEGG_PATHWAY          | <a href="#">Tyrosine metabolism</a>                                                                   | <a href="#">RT</a> |  |  |  |  | 9     | 1.1E-1  | 6.1E-1    |
| <input type="checkbox"/> | UP_SEQ_FEATURE        | binding site:S-adenosyl-L-methionine                                                                  | <a href="#">RT</a> |  |  |  |  | 4     | 1.5E-1  | 1.0E0     |
| <input type="checkbox"/> | KEGG_PATHWAY          | <a href="#">Histidine metabolism</a>                                                                  | <a href="#">RT</a> |  |  |  |  | 7     | 1.7E-1  | 7.2E-1    |
| <input type="checkbox"/> | KEGG_PATHWAY          | <a href="#">Androgen and estrogen metabolism</a>                                                      | <a href="#">RT</a> |  |  |  |  | 8     | 2.2E-1  | 8.1E-1    |
| <input type="checkbox"/> | GOTERM_BP_ALL         | <a href="#">histone methylation</a>                                                                   | <a href="#">RT</a> |  |  |  |  | 4     | 2.2E-1  | 9.8E-1    |
| <input type="checkbox"/> | GOTERM_BP_ALL         | <a href="#">histone modification</a>                                                                  | <a href="#">RT</a> |  |  |  |  | 7     | 2.3E-1  | 9.8E-1    |
| <input type="checkbox"/> | KEGG_PATHWAY          | <a href="#">Tryptophan metabolism</a>                                                                 | <a href="#">RT</a> |  |  |  |  | 8     | 2.3E-1  | 8.1E-1    |
| <input type="checkbox"/> | UP_SEQ_FEATURE        | binding site:S-adenosyl-L-methionine; via carbonyl oxygen                                             | <a href="#">RT</a> |  |  |  |  | 3     | 2.6E-1  | 1.0E0     |
|                          | Annotation Cluster 90 | Enrichment Score: 1.5                                                                                 | <b>G</b>           |  |  |  |  | Count | P_Value | Benjamini |
| <input type="checkbox"/> | GOTERM_BP_ALL         | <a href="#">nucleobase biosynthetic process</a>                                                       | <a href="#">RT</a> |  |  |  |  | 5     | 3.6E-3  | 1.1E-1    |
| <input type="checkbox"/> | GOTERM_BP_ALL         | <a href="#">pyrimidine base metabolic process</a>                                                     | <a href="#">RT</a> |  |  |  |  | 4     | 4.2E-2  | 6.2E-1    |
| <input type="checkbox"/> | GOTERM_BP_ALL         | <a href="#">'de novo' pyrimidine base biosynthetic process</a>                                        | <a href="#">RT</a> |  |  |  |  | 3     | 6.9E-2  | 7.6E-1    |
| <input type="checkbox"/> | GOTERM_BP_ALL         | <a href="#">pyrimidine base biosynthetic process</a>                                                  | <a href="#">RT</a> |  |  |  |  | 3     | 9.8E-2  | 8.5E-1    |
|                          | Annotation Cluster 91 | Enrichment Score: 1.5                                                                                 | <b>G</b>           |  |  |  |  | Count | P_Value | Benjamini |
| <input type="checkbox"/> | SMART                 | <a href="#">XPGN</a>                                                                                  | <a href="#">RT</a> |  |  |  |  | 3     | 2.4E-2  | 5.2E-1    |
| <input type="checkbox"/> | SMART                 | <a href="#">XPGI</a>                                                                                  | <a href="#">RT</a> |  |  |  |  | 3     | 2.4E-2  | 5.2E-1    |
| <input type="checkbox"/> | SMART                 | <a href="#">HhH2</a>                                                                                  | <a href="#">RT</a> |  |  |  |  | 3     | 2.4E-2  | 5.2E-1    |
| <input type="checkbox"/> | INTERPRO              | <a href="#">Helix-hairpin-helix motif, class 2</a>                                                    | <a href="#">RT</a> |  |  |  |  | 3     | 3.9E-2  | 9.4E-1    |
| <input type="checkbox"/> | INTERPRO              | <a href="#">XPG N-terminal</a>                                                                        | <a href="#">RT</a> |  |  |  |  | 3     | 3.9E-2  | 9.4E-1    |
| <input type="checkbox"/> | INTERPRO              | <a href="#">DNA repair protein (XPGC)/yeast Rad</a>                                                   | <a href="#">RT</a> |  |  |  |  | 3     | 3.9E-2  | 9.4E-1    |
| <input type="checkbox"/> | INTERPRO              | <a href="#">XPG I</a>                                                                                 | <a href="#">RT</a> |  |  |  |  | 3     | 3.9E-2  | 9.4E-1    |
|                          | Annotation Cluster 92 | Enrichment Score: 1.47                                                                                | <b>G</b>           |  |  |  |  | Count | P_Value | Benjamini |
| <input type="checkbox"/> | GOTERM_MF_ALL         | <a href="#">oxidoreductase activity, acting on the CH-NH group of donors, NAD or NADP as acceptor</a> | <a href="#">RT</a> |  |  |  |  | 7     | 1.2E-3  | 5.9E-2    |
| <input type="checkbox"/> | GOTERM_MF_ALL         | <a href="#">oxidoreductase activity, acting on the CH-NH group of donors</a>                          | <a href="#">RT</a> |  |  |  |  | 7     | 2.0E-2  | 4.7E-1    |
| <input type="checkbox"/> | INTERPRO              | <a href="#">Delta 1-pyrroline-5-carboxylate reductase</a>                                             | <a href="#">RT</a> |  |  |  |  | 3     | 2.1E-2  | 8.7E-1    |
| <input type="checkbox"/> | GOTERM_MF_ALL         | <a href="#">pyrroline-5-carboxylate reductase activity</a>                                            | <a href="#">RT</a> |  |  |  |  | 3     | 2.2E-2  | 5.0E-1    |
| <input type="checkbox"/> | PIR_SUPERFAMILY       | PIRSF000193:pyrroline-5-carboxylate                                                                   | <a href="#">DT</a> |  |  |  |  | 3     | 2.6E-2  | 1.0E0     |

| <input type="checkbox"/> |                       | reductase                                                                  | <a href="#">RT</a> |  |  |       |         |           |  |
|--------------------------|-----------------------|----------------------------------------------------------------------------|--------------------|--|--|-------|---------|-----------|--|
| <input type="checkbox"/> | GOTERM_BP_ALL         | <a href="#">glutamine family amino acid metabolic process</a>              | <a href="#">RT</a> |  |  | 8     | 4.7E-2  | 6.5E-1    |  |
| <input type="checkbox"/> | GOTERM_BP_ALL         | <a href="#">proline biosynthetic process</a>                               | <a href="#">RT</a> |  |  | 3     | 6.9E-2  | 7.6E-1    |  |
| <input type="checkbox"/> | INTERPRO              | <a href="#">NADP oxidoreductase, coenzyme F420-dependent</a>               | <a href="#">RT</a> |  |  | 3     | 1.2E-1  | 1.0E0     |  |
| <input type="checkbox"/> | GOTERM_BP_ALL         | <a href="#">proline metabolic process</a>                                  | <a href="#">RT</a> |  |  | 3     | 1.3E-1  | 9.1E-1    |  |
| <input type="checkbox"/> | GOTERM_BP_ALL         | <a href="#">glutamine family amino acid biosynthetic process</a>           | <a href="#">RT</a> |  |  | 4     | 1.5E-1  | 9.4E-1    |  |
|                          | Annotation Cluster 93 | Enrichment Score: 1.43                                                     | <b>G</b>           |  |  | Count | P_Value | Benjamini |  |
| <input type="checkbox"/> | GOTERM_CC_ALL         | <a href="#">organelle small ribosomal subunit</a>                          | <a href="#">RT</a> |  |  | 4     | 2.8E-2  | 2.1E-1    |  |
| <input type="checkbox"/> | GOTERM_CC_ALL         | <a href="#">mitochondrial small ribosomal subunit</a>                      | <a href="#">RT</a> |  |  | 4     | 2.8E-2  | 2.1E-1    |  |
| <input type="checkbox"/> | GOTERM_CC_ALL         | <a href="#">small ribosomal subunit</a>                                    | <a href="#">RT</a> |  |  | 7     | 6.7E-2  | 4.0E-1    |  |
|                          | Annotation Cluster 94 | Enrichment Score: 1.42                                                     | <b>G</b>           |  |  | Count | P_Value | Benjamini |  |
| <input type="checkbox"/> | GOTERM_BP_ALL         | <a href="#">ubiquinone biosynthetic process</a>                            | <a href="#">RT</a> |  |  | 4     | 3.0E-2  | 5.2E-1    |  |
| <input type="checkbox"/> | GOTERM_BP_ALL         | <a href="#">ubiquinone metabolic process</a>                               | <a href="#">RT</a> |  |  | 4     | 3.0E-2  | 5.2E-1    |  |
| <input type="checkbox"/> | SP_PIR_KEYWORDS       | <a href="#">ubiquinone biosynthesis</a>                                    | <a href="#">RT</a> |  |  | 4     | 3.0E-2  | 2.6E-1    |  |
| <input type="checkbox"/> | GOTERM_BP_ALL         | <a href="#">quinone cofactor biosynthetic process</a>                      | <a href="#">RT</a> |  |  | 4     | 4.2E-2  | 6.2E-1    |  |
| <input type="checkbox"/> | KEGG_PATHWAY          | <a href="#">Ubiquinone biosynthesis</a>                                    | <a href="#">RT</a> |  |  | 4     | 4.8E-2  | 4.4E-1    |  |
| <input type="checkbox"/> | GOTERM_BP_ALL         | <a href="#">quinone cofactor metabolic process</a>                         | <a href="#">RT</a> |  |  | 4     | 5.6E-2  | 7.0E-1    |  |
|                          | Annotation Cluster 95 | Enrichment Score: 1.41                                                     | <b>G</b>           |  |  | Count | P_Value | Benjamini |  |
| <input type="checkbox"/> | SMART                 | <a href="#">eIF1a</a>                                                      | <a href="#">RT</a> |  |  | 3     | 3.8E-2  | 6.6E-1    |  |
| <input type="checkbox"/> | INTERPRO              | <a href="#">Eukaryotic initiation factor 1A (eIF-1A)</a>                   | <a href="#">RT</a> |  |  | 3     | 3.9E-2  | 9.4E-1    |  |
| <input type="checkbox"/> | INTERPRO              | <a href="#">S1, IF1 type</a>                                               | <a href="#">RT</a> |  |  | 3     | 3.9E-2  | 9.4E-1    |  |
|                          | Annotation Cluster 96 | Enrichment Score: 1.35                                                     | <b>G</b>           |  |  | Count | P_Value | Benjamini |  |
| <input type="checkbox"/> | GOTERM_BP_ALL         | <a href="#">RNA catabolic process</a>                                      | <a href="#">RT</a> |  |  | 10    | 6.2E-3  | 1.7E-1    |  |
| <input type="checkbox"/> | GOTERM_BP_ALL         | <a href="#">mRNA catabolic process</a>                                     | <a href="#">RT</a> |  |  | 9     | 6.8E-3  | 1.8E-1    |  |
| <input type="checkbox"/> | GOTERM_BP_ALL         | <a href="#">mRNA catabolic process, nonsense-mediated decay</a>            | <a href="#">RT</a> |  |  | 4     | 2.7E-1  | 9.9E-1    |  |
| <input type="checkbox"/> | SP_PIR_KEYWORDS       | <a href="#">Nonsense-mediated mRNA decay</a>                               | <a href="#">RT</a> |  |  | 3     | 3.4E-1  | 9.5E-1    |  |
|                          | Annotation Cluster 97 | Enrichment Score: 1.32                                                     | <b>G</b>           |  |  | Count | P_Value | Benjamini |  |
| <input type="checkbox"/> | INTERPRO              | <a href="#">Transcription factor E2F/dimerisation partner (TDP)</a>        | <a href="#">RT</a> |  |  | 7     | 1.2E-4  | 5.8E-2    |  |
| <input type="checkbox"/> | INTERPRO              | <a href="#">E2F Family</a>                                                 | <a href="#">RT</a> |  |  | 6     | 2.1E-4  | 7.2E-2    |  |
| <input type="checkbox"/> | UP_SEQ_FEATURE        | short sequence motif:DEF box                                               | <a href="#">RT</a> |  |  | 4     | 8.1E-3  | 1.0E0     |  |
| <input type="checkbox"/> | UP_SEQ_FEATURE        | region of interest:Cyclin A/CDK2 binding                                   | <a href="#">RT</a> |  |  | 3     | 2.7E-2  | 1.0E0     |  |
| <input type="checkbox"/> | PIR_SUPERFAMILY       | PIRSF019596:transcription factor E2F                                       | <a href="#">RT</a> |  |  | 3     | 4.8E-2  | 1.0E0     |  |
| <input type="checkbox"/> | UP_SEQ_FEATURE        | region of interest:Dimerization                                            | <a href="#">RT</a> |  |  | 4     | 6.7E-2  | 1.0E0     |  |
| <input type="checkbox"/> | UP_SEQ_FEATURE        | region of interest:Transactivation                                         | <a href="#">RT</a> |  |  | 3     | 7.9E-2  | 1.0E0     |  |
| <input type="checkbox"/> | UP_SEQ_FEATURE        | domain:Leucine-zipper                                                      | <a href="#">RT</a> |  |  | 12    | 2.3E-1  | 1.0E0     |  |
| <input type="checkbox"/> | KEGG_PATHWAY          | <a href="#">Glioma</a>                                                     | <a href="#">RT</a> |  |  | 9     | 2.7E-1  | 8.5E-1    |  |
| <input type="checkbox"/> | KEGG_PATHWAY          | <a href="#">Non-small cell lung cancer</a>                                 | <a href="#">RT</a> |  |  | 8     | 3.2E-1  | 8.9E-1    |  |
| <input type="checkbox"/> | KEGG_PATHWAY          | <a href="#">Chronic myeloid leukemia</a>                                   | <a href="#">RT</a> |  |  | 9     | 5.1E-1  | 9.6E-1    |  |
| <input type="checkbox"/> | INTERPRO              | <a href="#">Winged helix repressor DNA-binding</a>                         | <a href="#">RT</a> |  |  | 10    | 5.9E-1  | 1.0E0     |  |
| <input type="checkbox"/> | KEGG_PATHWAY          | <a href="#">Melanoma</a>                                                   | <a href="#">RT</a> |  |  | 7     | 7.4E-1  | 9.9E-1    |  |
|                          | Annotation Cluster 98 | Enrichment Score: 1.32                                                     | <b>G</b>           |  |  | Count | P_Value | Benjamini |  |
| <input type="checkbox"/> | GOTERM_BP_ALL         | <a href="#">chromosome organization and biogenesis</a>                     | <a href="#">RT</a> |  |  | 50    | 2.9E-4  | 1.4E-2    |  |
| <input type="checkbox"/> | GOTERM_BP_ALL         | <a href="#">chromatin remodeling</a>                                       | <a href="#">RT</a> |  |  | 10    | 2.8E-2  | 5.1E-1    |  |
| <input type="checkbox"/> | GOTERM_BP_ALL         | <a href="#">covalent chromatin modification</a>                            | <a href="#">RT</a> |  |  | 10    | 3.2E-2  | 5.3E-1    |  |
| <input type="checkbox"/> | GOTERM_BP_ALL         | <a href="#">DNA packaging</a>                                              | <a href="#">RT</a> |  |  | 30    | 1.2E-1  | 9.0E-1    |  |
| <input type="checkbox"/> | GOTERM_BP_ALL         | <a href="#">chromatin modification</a>                                     | <a href="#">RT</a> |  |  | 21    | 2.2E-1  | 9.8E-1    |  |
| <input type="checkbox"/> | GOTERM_BP_ALL         | <a href="#">establishment and/or maintenance of chromatin architecture</a> | <a href="#">RT</a> |  |  | 27    | 2.5E-1  | 9.9E-1    |  |
| <input type="checkbox"/> | SP_PIR_KEYWORDS       | <a href="#">Chromatin regulator</a>                                        | <a href="#">RT</a> |  |  | 12    | 3.4E-1  | 9.5E-1    |  |

| Annotation Cluster 99    |                 | Enrichment Score: 1.3                                                                                     | G  |  | Count | P_Value | Benjamini |
|--------------------------|-----------------|-----------------------------------------------------------------------------------------------------------|----|--|-------|---------|-----------|
| <input type="checkbox"/> | GOTERM_BP_ALL   | <a href="#">deoxyribonucleotide metabolic process</a>                                                     | RT |  | 6     | 4.4E-3  | 1.3E-1    |
| <input type="checkbox"/> | GOTERM_BP_ALL   | <a href="#">deoxyribonucleoside diphosphate metabolic process</a>                                         | RT |  | 3     | 6.9E-2  | 7.6E-1    |
| <input type="checkbox"/> | GOTERM_BP_ALL   | <a href="#">nucleoside diphosphate metabolic process</a>                                                  | RT |  | 3     | 4.0E-1  | 1.0E0     |
| Annotation Cluster 100   |                 | Enrichment Score: 1.29                                                                                    | G  |  | Count | P_Value | Benjamini |
| <input type="checkbox"/> | SP_PIR_KEYWORDS | <a href="#">ubiquinone</a>                                                                                | RT |  | 9     | 2.3E-2  | 2.3E-1    |
| <input type="checkbox"/> | SP_PIR_KEYWORDS | <a href="#">NAD</a>                                                                                       | RT |  | 24    | 2.7E-2  | 2.4E-1    |
| <input type="checkbox"/> | GOTERM_MF_ALL   | <a href="#">NADH dehydrogenase (quinone) activity</a>                                                     | RT |  | 8     | 5.4E-2  | 7.2E-1    |
| <input type="checkbox"/> | GOTERM_MF_ALL   | <a href="#">NADH dehydrogenase activity</a>                                                               | RT |  | 8     | 5.4E-2  | 7.2E-1    |
| <input type="checkbox"/> | GOTERM_MF_ALL   | <a href="#">NADH dehydrogenase (ubiquinone) activity</a>                                                  | RT |  | 8     | 5.4E-2  | 7.2E-1    |
| <input type="checkbox"/> | GOTERM_MF_ALL   | <a href="#">oxidoreductase activity, acting on NADH or NADPH</a>                                          | RT |  | 11    | 5.5E-2  | 7.2E-1    |
| <input type="checkbox"/> | GOTERM_MF_ALL   | <a href="#">oxidoreductase activity, acting on NADH or NADPH, quinone or similar compound as acceptor</a> | RT |  | 8     | 8.3E-2  | 8.2E-1    |
| <input type="checkbox"/> | KEGG_PATHWAY    | <a href="#">Oxidative phosphorylation</a>                                                                 | RT |  | 17    | 9.9E-2  | 5.9E-1    |
| Annotation Cluster 101   |                 | Enrichment Score: 1.28                                                                                    | G  |  | Count | P_Value | Benjamini |
| <input type="checkbox"/> | GOTERM_BP_ALL   | <a href="#">deoxyribonucleotide metabolic process</a>                                                     | RT |  | 6     | 4.4E-3  | 1.3E-1    |
| <input type="checkbox"/> | GOTERM_BP_ALL   | <a href="#">pyrimidine nucleoside triphosphate metabolic process</a>                                      | RT |  | 6     | 1.5E-2  | 3.5E-1    |
| <input type="checkbox"/> | GOTERM_BP_ALL   | <a href="#">pyrimidine deoxyribonucleotide metabolic process</a>                                          | RT |  | 4     | 3.0E-2  | 5.2E-1    |
| <input type="checkbox"/> | GOTERM_BP_ALL   | <a href="#">pyrimidine nucleoside metabolic process</a>                                                   | RT |  | 4     | 5.6E-2  | 7.0E-1    |
| <input type="checkbox"/> | GOTERM_BP_ALL   | <a href="#">pyrimidine deoxyribonucleotide biosynthetic process</a>                                       | RT |  | 3     | 6.9E-2  | 7.6E-1    |
| <input type="checkbox"/> | GOTERM_BP_ALL   | <a href="#">pyrimidine deoxyribonucleoside triphosphate metabolic process</a>                             | RT |  | 3     | 9.8E-2  | 8.5E-1    |
| <input type="checkbox"/> | GOTERM_BP_ALL   | <a href="#">pyrimidine deoxyribonucleoside metabolic process</a>                                          | RT |  | 3     | 9.8E-2  | 8.5E-1    |
| <input type="checkbox"/> | GOTERM_BP_ALL   | <a href="#">deoxyribonucleotide biosynthetic process</a>                                                  | RT |  | 3     | 9.8E-2  | 8.5E-1    |
| <input type="checkbox"/> | GOTERM_BP_ALL   | <a href="#">deoxyribonucleoside metabolic process</a>                                                     | RT |  | 3     | 1.3E-1  | 9.1E-1    |
| <input type="checkbox"/> | GOTERM_BP_ALL   | <a href="#">deoxyribonucleoside triphosphate metabolic process</a>                                        | RT |  | 3     | 1.6E-1  | 9.4E-1    |
| Annotation Cluster 102   |                 | Enrichment Score: 1.27                                                                                    | G  |  | Count | P_Value | Benjamini |
| <input type="checkbox"/> | GOTERM_MF_ALL   | <a href="#">heat shock protein binding</a>                                                                | RT |  | 12    | 1.1E-2  | 3.2E-1    |
| <input type="checkbox"/> | SMART           | <a href="#">DnaJ</a>                                                                                      | RT |  | 8     | 2.5E-2  | 5.1E-1    |
| <input type="checkbox"/> | INTERPRO        | <a href="#">Heat shock protein DnaJ, N-terminal</a>                                                       | RT |  | 8     | 5.7E-2  | 9.8E-1    |
| <input type="checkbox"/> | INTERPRO        | <a href="#">Molecular chaperone, heat shock protein, Hsp40, DnaJ</a>                                      | RT |  | 7     | 5.9E-2  | 9.8E-1    |
| <input type="checkbox"/> | UP_SEQ_FEATURE  | domain:J                                                                                                  | RT |  | 4     | 5.0E-1  | 1.0E0     |
| Annotation Cluster 103   |                 | Enrichment Score: 1.27                                                                                    | G  |  | Count | P_Value | Benjamini |
| <input type="checkbox"/> | GOTERM_BP_ALL   | <a href="#">pyrimidine nucleotide metabolic process</a>                                                   | RT |  | 10    | 3.2E-4  | 1.5E-2    |
| <input type="checkbox"/> | GOTERM_BP_ALL   | <a href="#">pyrimidine nucleotide biosynthetic process</a>                                                | RT |  | 9     | 3.3E-4  | 1.5E-2    |
| <input type="checkbox"/> | GOTERM_BP_ALL   | <a href="#">pyrimidine nucleoside triphosphate metabolic process</a>                                      | RT |  | 6     | 1.5E-2  | 3.5E-1    |
| <input type="checkbox"/> | GOTERM_BP_ALL   | <a href="#">pyrimidine ribonucleotide biosynthetic process</a>                                            | RT |  | 4     | 1.1E-1  | 8.8E-1    |
| <input type="checkbox"/> | GOTERM_BP_ALL   | <a href="#">pyrimidine ribonucleotide metabolic process</a>                                               | RT |  | 4     | 1.3E-1  | 9.1E-1    |
| <input type="checkbox"/> | GOTERM_BP_ALL   | <a href="#">CTP biosynthetic process</a>                                                                  | RT |  | 3     | 2.7E-1  | 9.9E-1    |
| <input type="checkbox"/> | GOTERM_BP_ALL   | <a href="#">CTP metabolic process</a>                                                                     | RT |  | 3     | 2.7E-1  | 9.9E-1    |
| <input type="checkbox"/> | GOTERM_BP_ALL   | <a href="#">pyrimidine ribonucleoside triphosphate biosynthetic process</a>                               | RT |  | 3     | 2.7E-1  | 9.9E-1    |
| <input type="checkbox"/> | GOTERM_BP_ALL   | <a href="#">pyrimidine ribonucleoside triphosphate metabolic process</a>                                  | RT |  | 3     | 2.7E-1  | 9.9E-1    |
| <input type="checkbox"/> | GOTERM_BP_ALL   | <a href="#">ribonucleoside triphosphate biosynthetic process</a>                                          | RT |  | 8     | 2.8E-1  | 9.9E-1    |
| <input type="checkbox"/> | GOTERM_BP_ALL   | <a href="#">ribonucleoside triphosphate metabolic process</a>                                             | RT |  | 8     | 3.7E-1  | 1.0E0     |
| Annotation Cluster 104   |                 | Enrichment Score: 1.21                                                                                    | G  |  | Count | P_Value | Benjamini |

| <input type="checkbox"/> | Category        | Description                                                                        | RT       | Bar | Count | P-Value | Benjamini |
|--------------------------|-----------------|------------------------------------------------------------------------------------|----------|-----|-------|---------|-----------|
| <input type="checkbox"/> | GOTERM_BP_ALL   | <a href="#">maintenance of fidelity during DNA-dependent DNA replication</a>       | RT       |     | 6     | 8.7E-3  | 2.3E-1    |
| <input type="checkbox"/> | GOTERM_BP_ALL   | <a href="#">mismatch repair</a>                                                    | RT       |     | 5     | 3.3E-2  | 5.5E-1    |
| <input type="checkbox"/> | GOTERM_MF_ALL   | <a href="#">mismatched DNA binding</a>                                             | RT       |     | 3     | 2.2E-1  | 9.8E-1    |
| <input type="checkbox"/> | GOTERM_MF_ALL   | <a href="#">double-stranded DNA binding</a>                                        | RT       |     | 5     | 2.4E-1  | 9.8E-1    |
| Annotation Cluster 105   |                 | Enrichment Score: 1.19                                                             | <b>G</b> |     |       |         |           |
| <input type="checkbox"/> | SP_PIR_KEYWORDS | <a href="#">redox-active center</a>                                                | RT       |     | 10    | 5.1E-3  | 6.2E-2    |
| <input type="checkbox"/> | GOTERM_BP_ALL   | <a href="#">cell redox homeostasis</a>                                             | RT       |     | 12    | 6.5E-3  | 1.8E-1    |
| <input type="checkbox"/> | INTERPRO        | <a href="#">Thioredoxin domain</a>                                                 | RT       |     | 7     | 1.1E-2  | 7.2E-1    |
| <input type="checkbox"/> | PIR_SUPERFAMILY | PIRSF001487:protein disulfide-isomerase                                            | RT       |     | 4     | 2.3E-2  | 1.0E0     |
| <input type="checkbox"/> | UP_SEQ_FEATURE  | domain:Thioredoxin 2                                                               | RT       |     | 4     | 2.4E-2  | 1.0E0     |
| <input type="checkbox"/> | UP_SEQ_FEATURE  | domain:Thioredoxin 1                                                               | RT       |     | 4     | 2.4E-2  | 1.0E0     |
| <input type="checkbox"/> | UP_SEQ_FEATURE  | short sequence motif:Prevents secretion from ER                                    | RT       |     | 9     | 2.8E-2  | 1.0E0     |
| <input type="checkbox"/> | INTERPRO        | <a href="#">Thioredoxin-related</a>                                                | RT       |     | 7     | 2.9E-2  | 9.3E-1    |
| <input type="checkbox"/> | INTERPRO        | <a href="#">Disulphide isomerase</a>                                               | RT       |     | 3     | 6.2E-2  | 9.8E-1    |
| <input type="checkbox"/> | INTERPRO        | <a href="#">Endoplasmic reticulum targeting sequence</a>                           | RT       |     | 9     | 8.0E-2  | 9.9E-1    |
| <input type="checkbox"/> | GOTERM_MF_ALL   | <a href="#">intramolecular oxidoreductase activity</a>                             | RT       |     | 8     | 1.2E-1  | 9.2E-1    |
| <input type="checkbox"/> | GOTERM_MF_ALL   | <a href="#">protein disulfide isomerase activity</a>                               | RT       |     | 3     | 1.5E-1  | 9.4E-1    |
| <input type="checkbox"/> | INTERPRO        | <a href="#">Thioredoxin fold</a>                                                   | RT       |     | 10    | 2.3E-1  | 1.0E0     |
| <input type="checkbox"/> | GOTERM_BP_ALL   | <a href="#">cellular homeostasis</a>                                               | RT       |     | 19    | 9.0E-1  | 1.0E0     |
| <input type="checkbox"/> | GOTERM_BP_ALL   | <a href="#">homeostatic process</a>                                                | RT       |     | 25    | 9.7E-1  | 1.0E0     |
| <input type="checkbox"/> | GOTERM_BP_ALL   | <a href="#">regulation of biological quality</a>                                   | RT       |     | 40    | 1.0E0   | 1.0E0     |
| Annotation Cluster 106   |                 | Enrichment Score: 1.18                                                             | <b>G</b> |     |       |         |           |
| <input type="checkbox"/> | UP_SEQ_FEATURE  | repeat:2-1                                                                         | RT       |     | 5     | 3.2E-2  | 1.0E0     |
| <input type="checkbox"/> | UP_SEQ_FEATURE  | repeat:1-3                                                                         | RT       |     | 4     | 3.6E-2  | 1.0E0     |
| <input type="checkbox"/> | UP_SEQ_FEATURE  | repeat:1-2                                                                         | RT       |     | 5     | 4.1E-2  | 1.0E0     |
| <input type="checkbox"/> | UP_SEQ_FEATURE  | repeat:2-2                                                                         | RT       |     | 5     | 4.1E-2  | 1.0E0     |
| <input type="checkbox"/> | UP_SEQ_FEATURE  | repeat:1-1                                                                         | RT       |     | 4     | 1.1E-1  | 1.0E0     |
| <input type="checkbox"/> | UP_SEQ_FEATURE  | repeat:1-4                                                                         | RT       |     | 3     | 1.4E-1  | 1.0E0     |
| <input type="checkbox"/> | UP_SEQ_FEATURE  | repeat:2-3                                                                         | RT       |     | 3     | 1.8E-1  | 1.0E0     |
| Annotation Cluster 107   |                 | Enrichment Score: 1.18                                                             | <b>G</b> |     |       |         |           |
| <input type="checkbox"/> | GOTERM_BP_ALL   | <a href="#">meiosis I</a>                                                          | RT       |     | 8     | 1.1E-2  | 2.8E-1    |
| <input type="checkbox"/> | GOTERM_BP_ALL   | <a href="#">meiotic prophase I</a>                                                 | RT       |     | 3     | 1.6E-1  | 9.4E-1    |
| <input type="checkbox"/> | GOTERM_BP_ALL   | <a href="#">prophase</a>                                                           | RT       |     | 3     | 1.6E-1  | 9.4E-1    |
| Annotation Cluster 108   |                 | Enrichment Score: 1.15                                                             | <b>G</b> |     |       |         |           |
| <input type="checkbox"/> | BIOCARTA        | <a href="#">RB Tumor Suppressor/Checkpoint Signaling in response to DNA damage</a> | RT       |     | 5     | 2.5E-2  | 4.0E-1    |
| <input type="checkbox"/> | BIOCARTA        | <a href="#">Cell Cycle</a>                                                         | RT       |     | 6     | 8.3E-2  | 7.5E-1    |
| <input type="checkbox"/> | BIOCARTA        | <a href="#">cdc25 and chk1 Regulatory Pathway in response to DNA damage</a>        | RT       |     | 3     | 1.7E-1  | 8.1E-1    |
| Annotation Cluster 109   |                 | Enrichment Score: 1.12                                                             | <b>G</b> |     |       |         |           |
| <input type="checkbox"/> | GOTERM_MF_ALL   | <a href="#">hormone receptor binding</a>                                           | RT       |     | 7     | 2.0E-2  | 4.7E-1    |
| <input type="checkbox"/> | GOTERM_MF_ALL   | <a href="#">nuclear hormone receptor binding</a>                                   | RT       |     | 6     | 4.8E-2  | 7.1E-1    |
| <input type="checkbox"/> | GOTERM_MF_ALL   | <a href="#">thyroid hormone receptor binding</a>                                   | RT       |     | 3     | 1.5E-1  | 9.4E-1    |
| <input type="checkbox"/> | GOTERM_MF_ALL   | <a href="#">steroid hormone receptor binding</a>                                   | RT       |     | 3     | 2.2E-1  | 9.8E-1    |
| Annotation Cluster 110   |                 | Enrichment Score: 1.11                                                             | <b>G</b> |     |       |         |           |
| <input type="checkbox"/> | SMART           | <a href="#">DSRM</a>                                                               | RT       |     | 6     | 1.9E-2  | 4.9E-1    |
| <input type="checkbox"/> | INTERPRO        | <a href="#">Double-stranded RNA-binding-like</a>                                   | RT       |     | 6     | 1.9E-2  | 8.7E-1    |
| <input type="checkbox"/> | GOTERM_MF_ALL   | <a href="#">double-stranded RNA binding</a>                                        | RT       |     | 7     | 1.1E-1  | 8.9E-1    |
| <input type="checkbox"/> | INTERPRO        | <a href="#">Double-stranded RNA binding</a>                                        | RT       |     | 5     | 1.1E-1  | 1.0E0     |
| <input type="checkbox"/> | UP_SEQ_FEATURE  | domain:DRBM 2                                                                      | RT       |     | 3     | 2.2E-1  | 1.0E0     |
| <input type="checkbox"/> | UP_SEQ_FEATURE  | domain:DRBM 1                                                                      | RT       |     | 3     | 2.2E-1  | 1.0E0     |

| Annotation Cluster 111   |                | Enrichment Score: 1.11                                                   |                    | G |  | Count | P_Value | Benjamini |
|--------------------------|----------------|--------------------------------------------------------------------------|--------------------|---|--|-------|---------|-----------|
| <input type="checkbox"/> | SMART          | <a href="#">KH</a>                                                       | <a href="#">RT</a> |   |  | 7     | 1.5E-2  | 4.3E-1    |
| <input type="checkbox"/> | INTERPRO       | <a href="#">K Homology</a>                                               | <a href="#">RT</a> |   |  | 7     | 3.9E-2  | 9.7E-1    |
| <input type="checkbox"/> | INTERPRO       | <a href="#">K Homology, type 1</a>                                       | <a href="#">RT</a> |   |  | 7     | 4.5E-2  | 9.6E-1    |
| <input type="checkbox"/> | UP_SEQ_FEATURE | domain:KH 2                                                              | <a href="#">RT</a> |   |  | 3     | 3.3E-1  | 1.0E0     |
| <input type="checkbox"/> | UP_SEQ_FEATURE | domain:KH 1                                                              | <a href="#">RT</a> |   |  | 3     | 3.3E-1  | 1.0E0     |
| Annotation Cluster 112   |                | Enrichment Score: 1.08                                                   |                    | G |  | Count | P_Value | Benjamini |
| <input type="checkbox"/> | GOTERM_BP_ALL  | <a href="#">biopolymer methylation</a>                                   | <a href="#">RT</a> |   |  | 12    | 8.6E-3  | 2.3E-1    |
| <input type="checkbox"/> | GOTERM_BP_ALL  | <a href="#">methylation</a>                                              | <a href="#">RT</a> |   |  | 12    | 1.3E-2  | 3.1E-1    |
| <input type="checkbox"/> | GOTERM_BP_ALL  | <a href="#">regulation of gene expression, epigenetic</a>                | <a href="#">RT</a> |   |  | 10    | 6.6E-2  | 7.5E-1    |
| <input type="checkbox"/> | GOTERM_BP_ALL  | <a href="#">DNA methylation</a>                                          | <a href="#">RT</a> |   |  | 4     | 3.3E-1  | 9.9E-1    |
| <input type="checkbox"/> | GOTERM_BP_ALL  | <a href="#">DNA alkylation</a>                                           | <a href="#">RT</a> |   |  | 4     | 3.3E-1  | 9.9E-1    |
| <input type="checkbox"/> | GOTERM_BP_ALL  | <a href="#">DNA modification</a>                                         | <a href="#">RT</a> |   |  | 4     | 4.0E-1  | 1.0E0     |
| Annotation Cluster 113   |                | Enrichment Score: 1.05                                                   |                    | G |  | Count | P_Value | Benjamini |
| <input type="checkbox"/> | GOTERM_BP_ALL  | <a href="#">blastocyst growth</a>                                        | <a href="#">RT</a> |   |  | 6     | 6.3E-3  | 1.7E-1    |
| <input type="checkbox"/> | GOTERM_BP_ALL  | <a href="#">inner cell mass cell proliferation</a>                       | <a href="#">RT</a> |   |  | 4     | 3.0E-2  | 5.2E-1    |
| <input type="checkbox"/> | GOTERM_BP_ALL  | <a href="#">blastocyst development</a>                                   | <a href="#">RT</a> |   |  | 8     | 3.6E-2  | 5.8E-1    |
| <input type="checkbox"/> | GOTERM_BP_ALL  | <a href="#">developmental growth</a>                                     | <a href="#">RT</a> |   |  | 8     | 1.9E-1  | 9.7E-1    |
| <input type="checkbox"/> | GOTERM_BP_ALL  | <a href="#">in utero embryonic development</a>                           | <a href="#">RT</a> |   |  | 14    | 3.5E-1  | 1.0E0     |
| <input type="checkbox"/> | GOTERM_BP_ALL  | <a href="#">growth</a>                                                   | <a href="#">RT</a> |   |  | 13    | 1.0E0   | 1.0E0     |
| Annotation Cluster 114   |                | Enrichment Score: 1.05                                                   |                    | G |  | Count | P_Value | Benjamini |
| <input type="checkbox"/> | GOTERM_CC_ALL  | <a href="#">heterochromatin</a>                                          | <a href="#">RT</a> |   |  | 12    | 4.2E-4  | 4.8E-3    |
| <input type="checkbox"/> | INTERPRO       | <a href="#">SNF2-related</a>                                             | <a href="#">RT</a> |   |  | 8     | 8.0E-3  | 6.2E-1    |
| <input type="checkbox"/> | GOTERM_BP_ALL  | <a href="#">chromatin remodeling</a>                                     | <a href="#">RT</a> |   |  | 10    | 2.8E-2  | 5.1E-1    |
| <input type="checkbox"/> | GOTERM_BP_ALL  | <a href="#">covalent chromatin modification</a>                          | <a href="#">RT</a> |   |  | 10    | 3.2E-2  | 5.3E-1    |
| <input type="checkbox"/> | GOTERM_BP_ALL  | <a href="#">gene silencing</a>                                           | <a href="#">RT</a> |   |  | 8     | 4.2E-2  | 6.3E-1    |
| <input type="checkbox"/> | GOTERM_BP_ALL  | <a href="#">regulation of gene expression, epigenetic</a>                | <a href="#">RT</a> |   |  | 10    | 6.6E-2  | 7.5E-1    |
| <input type="checkbox"/> | GOTERM_BP_ALL  | <a href="#">methylation-dependent chromatin silencing</a>                | <a href="#">RT</a> |   |  | 3     | 6.9E-2  | 7.6E-1    |
| <input type="checkbox"/> | GOTERM_CC_ALL  | <a href="#">chromatin remodeling complex</a>                             | <a href="#">RT</a> |   |  | 5     | 1.1E-1  | 5.6E-1    |
| <input type="checkbox"/> | GOTERM_CC_ALL  | <a href="#">SWI/SNF complex</a>                                          | <a href="#">RT</a> |   |  | 3     | 1.2E-1  | 5.9E-1    |
| <input type="checkbox"/> | GOTERM_BP_ALL  | <a href="#">chromatin silencing</a>                                      | <a href="#">RT</a> |   |  | 4     | 1.7E-1  | 9.6E-1    |
| <input type="checkbox"/> | GOTERM_BP_ALL  | <a href="#">heterochromatin formation</a>                                | <a href="#">RT</a> |   |  | 4     | 1.7E-1  | 9.6E-1    |
| <input type="checkbox"/> | GOTERM_BP_ALL  | <a href="#">protein-DNA complex assembly</a>                             | <a href="#">RT</a> |   |  | 12    | 2.2E-1  | 9.8E-1    |
| <input type="checkbox"/> | GOTERM_BP_ALL  | <a href="#">negative regulation of gene expression, epigenetic</a>       | <a href="#">RT</a> |   |  | 4     | 2.5E-1  | 9.9E-1    |
| <input type="checkbox"/> | GOTERM_BP_ALL  | <a href="#">chromatin assembly</a>                                       | <a href="#">RT</a> |   |  | 9     | 3.2E-1  | 9.9E-1    |
| <input type="checkbox"/> | GOTERM_BP_ALL  | <a href="#">chromatin assembly or disassembly</a>                        | <a href="#">RT</a> |   |  | 12    | 3.5E-1  | 1.0E0     |
| <input type="checkbox"/> | BIOCARTA       | <a href="#">Control of Gene Expression by Vitamin D Receptor</a>         | <a href="#">RT</a> |   |  | 5     | 3.7E-1  | 9.4E-1    |
| <input type="checkbox"/> | GOTERM_BP_ALL  | <a href="#">nucleosome assembly</a>                                      | <a href="#">RT</a> |   |  | 7     | 4.2E-1  | 1.0E0     |
| <input type="checkbox"/> | BIOCARTA       | <a href="#">Chromatin Remodeling by hSWI/SNF ATP-dependent Complexes</a> | <a href="#">RT</a> |   |  | 3     | 6.0E-1  | 9.8E-1    |
| Annotation Cluster 115   |                | Enrichment Score: 1.05                                                   |                    | G |  | Count | P_Value | Benjamini |
| <input type="checkbox"/> | GOTERM_BP_ALL  | <a href="#">coenzyme metabolic process</a>                               | <a href="#">RT</a> |   |  | 24    | 5.4E-2  | 6.8E-1    |
| <input type="checkbox"/> | GOTERM_BP_ALL  | <a href="#">coenzyme biosynthetic process</a>                            | <a href="#">RT</a> |   |  | 15    | 6.1E-2  | 7.3E-1    |
| <input type="checkbox"/> | GOTERM_BP_ALL  | <a href="#">cofactor biosynthetic process</a>                            | <a href="#">RT</a> |   |  | 16    | 1.0E-1  | 8.6E-1    |
| <input type="checkbox"/> | GOTERM_BP_ALL  | <a href="#">cofactor metabolic process</a>                               | <a href="#">RT</a> |   |  | 25    | 2.0E-1  | 9.7E-1    |
| Annotation Cluster 116   |                | Enrichment Score: 1.03                                                   |                    | G |  | Count | P_Value | Benjamini |
| <input type="checkbox"/> | GOTERM_CC_ALL  | <a href="#">nuclear chromatin</a>                                        | <a href="#">RT</a> |   |  | 8     | 1.4E-2  | 1.3E-1    |
| <input type="checkbox"/> | GOTERM_CC_ALL  | <a href="#">nuclear heterochromatin</a>                                  | <a href="#">RT</a> |   |  | 6     | 4.8E-2  | 3.2E-1    |
| <input type="checkbox"/> | SMART          | <a href="#">CHROMO</a>                                                   | <a href="#">RT</a> |   |  | 4     | 2.8E-1  | 1.0E0     |

| <input type="checkbox"/> | INTERPRO        | <a href="#">Chromo</a>                                                                    | <a href="#">RT</a>     |          | 4  | 3.9E-1 | 1.0E0   |           |
|--------------------------|-----------------|-------------------------------------------------------------------------------------------|------------------------|----------|----|--------|---------|-----------|
|                          |                 | Annotation Cluster 117                                                                    | Enrichment Score: 1.02 | <b>G</b> |    | Count  | P_Value | Benjamini |
| <input type="checkbox"/> | GOTERM_BP_ALL   | <a href="#">polyol metabolic process</a>                                                  | <a href="#">RT</a>     |          | 6  | 4.5E-2 | 6.3E-1  |           |
| <input type="checkbox"/> | GOTERM_BP_ALL   | <a href="#">glycerol metabolic process</a>                                                | <a href="#">RT</a>     |          | 5  | 1.2E-1 | 9.0E-1  |           |
| <input type="checkbox"/> | GOTERM_BP_ALL   | <a href="#">glycerol-3-phosphate metabolic process</a>                                    | <a href="#">RT</a>     |          | 3  | 1.6E-1 | 9.4E-1  |           |
|                          |                 | Annotation Cluster 118                                                                    | Enrichment Score: 0.98 | <b>G</b> |    | Count  | P_Value | Benjamini |
| <input type="checkbox"/> | SMART           | <a href="#">TUDOR</a>                                                                     | <a href="#">RT</a>     |          | 5  | 6.2E-2 | 7.9E-1  |           |
| <input type="checkbox"/> | INTERPRO        | <a href="#">Tudor</a>                                                                     | <a href="#">RT</a>     |          | 5  | 7.4E-2 | 9.9E-1  |           |
| <input type="checkbox"/> | UP_SEQ_FEATURE  | domain:Tudor                                                                              | <a href="#">RT</a>     |          | 3  | 1.4E-1 | 1.0E0   |           |
| <input type="checkbox"/> | INTERPRO        | <a href="#">Maternal tudor protein</a>                                                    | <a href="#">RT</a>     |          | 3  | 1.8E-1 | 1.0E0   |           |
|                          |                 | Annotation Cluster 119                                                                    | Enrichment Score: 0.94 | <b>G</b> |    | Count  | P_Value | Benjamini |
| <input type="checkbox"/> | GOTERM_BP_ALL   | <a href="#">nucleotide biosynthetic process</a>                                           | <a href="#">RT</a>     |          | 32 | 3.6E-6 | 2.8E-4  |           |
| <input type="checkbox"/> | GOTERM_BP_ALL   | <a href="#">nucleobase, nucleoside and nucleotide metabolic process</a>                   | <a href="#">RT</a>     |          | 41 | 1.8E-5 | 1.2E-3  |           |
| <input type="checkbox"/> | GOTERM_BP_ALL   | <a href="#">purine nucleotide biosynthetic process</a>                                    | <a href="#">RT</a>     |          | 20 | 8.1E-5 | 4.5E-3  |           |
| <input type="checkbox"/> | GOTERM_BP_ALL   | <a href="#">nucleotide metabolic process</a>                                              | <a href="#">RT</a>     |          | 37 | 1.2E-4 | 6.2E-3  |           |
| <input type="checkbox"/> | GOTERM_BP_ALL   | <a href="#">purine nucleotide metabolic process</a>                                       | <a href="#">RT</a>     |          | 20 | 4.2E-4 | 1.9E-2  |           |
| <input type="checkbox"/> | GOTERM_BP_ALL   | <a href="#">ribonucleotide biosynthetic process</a>                                       | <a href="#">RT</a>     |          | 18 | 4.8E-4 | 2.1E-2  |           |
| <input type="checkbox"/> | GOTERM_BP_ALL   | <a href="#">ribonucleotide metabolic process</a>                                          | <a href="#">RT</a>     |          | 18 | 2.3E-3 | 7.7E-2  |           |
| <input type="checkbox"/> | GOTERM_BP_ALL   | <a href="#">purine ribonucleotide biosynthetic process</a>                                | <a href="#">RT</a>     |          | 13 | 2.4E-2 | 4.6E-1  |           |
| <input type="checkbox"/> | GOTERM_BP_ALL   | <a href="#">purine ribonucleotide metabolic process</a>                                   | <a href="#">RT</a>     |          | 13 | 5.0E-2 | 6.6E-1  |           |
| <input type="checkbox"/> | GOTERM_BP_ALL   | <a href="#">coenzyme biosynthetic process</a>                                             | <a href="#">RT</a>     |          | 15 | 6.1E-2 | 7.3E-1  |           |
| <input type="checkbox"/> | GOTERM_CC_ALL   | <a href="#">proton-transporting ATP synthase complex, coupling factor F(o)</a>            | <a href="#">RT</a>     |          | 4  | 6.7E-2 | 4.1E-1  |           |
| <input type="checkbox"/> | GOTERM_CC_ALL   | <a href="#">proton-transporting two-sector ATPase complex, proton-transporting domain</a> | <a href="#">RT</a>     |          | 4  | 6.7E-2 | 4.1E-1  |           |
| <input type="checkbox"/> | SP_PIR_KEYWORDS | <a href="#">CF(0)</a>                                                                     | <a href="#">RT</a>     |          | 4  | 7.2E-2 | 4.8E-1  |           |
| <input type="checkbox"/> | GOTERM_CC_ALL   | <a href="#">proton-transporting ATP synthase complex</a>                                  | <a href="#">RT</a>     |          | 5  | 9.5E-2 | 5.1E-1  |           |
| <input type="checkbox"/> | GOTERM_BP_ALL   | <a href="#">nucleoside triphosphate biosynthetic process</a>                              | <a href="#">RT</a>     |          | 10 | 1.1E-1 | 8.7E-1  |           |
| <input type="checkbox"/> | GOTERM_BP_ALL   | <a href="#">nucleoside triphosphate metabolic process</a>                                 | <a href="#">RT</a>     |          | 11 | 1.3E-1 | 9.1E-1  |           |
| <input type="checkbox"/> | GOTERM_BP_ALL   | <a href="#">ribonucleoside triphosphate biosynthetic process</a>                          | <a href="#">RT</a>     |          | 8  | 2.8E-1 | 9.9E-1  |           |
| <input type="checkbox"/> | GOTERM_BP_ALL   | <a href="#">ribonucleoside triphosphate metabolic process</a>                             | <a href="#">RT</a>     |          | 8  | 3.7E-1 | 1.0E0   |           |
| <input type="checkbox"/> | SP_PIR_KEYWORDS | <a href="#">hydrogen ion transport</a>                                                    | <a href="#">RT</a>     |          | 6  | 3.8E-1 | 9.6E-1  |           |
| <input type="checkbox"/> | GOTERM_BP_ALL   | <a href="#">purine nucleoside triphosphate biosynthetic process</a>                       | <a href="#">RT</a>     |          | 7  | 4.2E-1 | 1.0E0   |           |
| <input type="checkbox"/> | GOTERM_BP_ALL   | <a href="#">purine ribonucleoside triphosphate biosynthetic process</a>                   | <a href="#">RT</a>     |          | 7  | 4.2E-1 | 1.0E0   |           |
| <input type="checkbox"/> | GOTERM_BP_ALL   | <a href="#">purine ribonucleoside triphosphate metabolic process</a>                      | <a href="#">RT</a>     |          | 7  | 5.0E-1 | 1.0E0   |           |
| <input type="checkbox"/> | GOTERM_BP_ALL   | <a href="#">purine nucleoside triphosphate metabolic process</a>                          | <a href="#">RT</a>     |          | 7  | 5.4E-1 | 1.0E0   |           |
| <input type="checkbox"/> | GOTERM_BP_ALL   | <a href="#">ATP synthesis coupled proton transport</a>                                    | <a href="#">RT</a>     |          | 5  | 5.6E-1 | 1.0E0   |           |
| <input type="checkbox"/> | GOTERM_MF_ALL   | <a href="#">inorganic cation transmembrane transporter activity</a>                       | <a href="#">RT</a>     |          | 14 | 5.6E-1 | 1.0E0   |           |
| <input type="checkbox"/> | GOTERM_MF_ALL   | <a href="#">cation-transporting ATPase activity</a>                                       | <a href="#">RT</a>     |          | 6  | 5.8E-1 | 1.0E0   |           |
| <input type="checkbox"/> | GOTERM_MF_ALL   | <a href="#">P-P-bond-hydrolysis-driven transmembrane transporter activity</a>             | <a href="#">RT</a>     |          | 14 | 5.8E-1 | 1.0E0   |           |
| <input type="checkbox"/> | GOTERM_MF_ALL   | <a href="#">primary active transmembrane transporter activity</a>                         | <a href="#">RT</a>     |          | 14 | 5.8E-1 | 1.0E0   |           |
| <input type="checkbox"/> | GOTERM_MF_ALL   | <a href="#">hydrogen ion transporting ATP synthase activity, rotational mechanism</a>     | <a href="#">RT</a>     |          | 5  | 5.9E-1 | 1.0E0   |           |
| <input type="checkbox"/> | GOTERM_MF_ALL   | <a href="#">hydrogen ion transporting ATPase activity, rotational mechanism</a>           | <a href="#">RT</a>     |          | 5  | 6.1E-1 | 1.0E0   |           |
| <input type="checkbox"/> | GOTERM_BP_ALL   | <a href="#">ATP biosynthetic process</a>                                                  | <a href="#">RT</a>     |          | 5  | 6.3E-1 | 1.0E0   |           |
| <input type="checkbox"/> | GOTERM_BP_ALL   | <a href="#">nucleoside phosphate metabolic process</a>                                    | <a href="#">RT</a>     |          | 5  | 6.3E-1 | 1.0E0   |           |
| <input type="checkbox"/> | GOTERM_BP_ALL   | <a href="#">proton transport</a>                                                          | <a href="#">RT</a>     |          | 7  | 6.5E-1 | 1.0E0   |           |

|                          |                        |                                                                                                                                                                               |                    |  |       |         |           |
|--------------------------|------------------------|-------------------------------------------------------------------------------------------------------------------------------------------------------------------------------|--------------------|--|-------|---------|-----------|
| <input type="checkbox"/> | GOTERM_CC_ALL          | <a href="#">proton-transporting two-sector ATPase complex</a>                                                                                                                 | <a href="#">RT</a> |  | 5     | 6.6E-1  | 1.0E0     |
| <input type="checkbox"/> | SP_PIR_KEYWORDS        | <a href="#">ATP synthesis</a>                                                                                                                                                 | <a href="#">RT</a> |  | 3     | 7.0E-1  | 1.0E0     |
| <input type="checkbox"/> | GOTERM_BP_ALL          | <a href="#">ATP metabolic process</a>                                                                                                                                         | <a href="#">RT</a> |  | 5     | 7.1E-1  | 1.0E0     |
| <input type="checkbox"/> | GOTERM_BP_ALL          | <a href="#">hydrogen transport</a>                                                                                                                                            | <a href="#">RT</a> |  | 7     | 7.3E-1  | 1.0E0     |
| <input type="checkbox"/> | GOTERM_BP_ALL          | <a href="#">oxidative phosphorylation</a>                                                                                                                                     | <a href="#">RT</a> |  | 5     | 8.0E-1  | 1.0E0     |
| <input type="checkbox"/> | GOTERM_MF_ALL          | <a href="#">hydrogen ion transmembrane transporter activity</a>                                                                                                               | <a href="#">RT</a> |  | 8     | 8.5E-1  | 1.0E0     |
| <input type="checkbox"/> | GOTERM_MF_ALL          | <a href="#">ATPase activity, coupled to transmembrane movement of ions</a>                                                                                                    | <a href="#">RT</a> |  | 7     | 8.7E-1  | 1.0E0     |
| <input type="checkbox"/> | GOTERM_MF_ALL          | <a href="#">monovalent inorganic cation transmembrane transporter activity</a>                                                                                                | <a href="#">RT</a> |  | 8     | 8.7E-1  | 1.0E0     |
| <input type="checkbox"/> | GOTERM_MF_ALL          | <a href="#">active transmembrane transporter activity</a>                                                                                                                     | <a href="#">RT</a> |  | 26    | 8.9E-1  | 1.0E0     |
| <input type="checkbox"/> | GOTERM_MF_ALL          | <a href="#">ATPase activity, coupled to movement of substances</a>                                                                                                            | <a href="#">RT</a> |  | 9     | 9.3E-1  | 1.0E0     |
| <input type="checkbox"/> | GOTERM_MF_ALL          | <a href="#">ATPase activity, coupled to transmembrane movement of substances</a>                                                                                              | <a href="#">RT</a> |  | 9     | 9.3E-1  | 1.0E0     |
| <input type="checkbox"/> | GOTERM_MF_ALL          | <a href="#">hydrolase activity, acting on acid anhydrides, catalyzing transmembrane movement of substances</a>                                                                | <a href="#">RT</a> |  | 9     | 9.4E-1  | 1.0E0     |
| <input type="checkbox"/> | GOTERM_MF_ALL          | <a href="#">ATPase activity, coupled to transmembrane movement of ions, phosphorylative mechanism</a>                                                                         | <a href="#">RT</a> |  | 3     | 9.8E-1  | 1.0E0     |
| <input type="checkbox"/> | GOTERM_BP_ALL          | <a href="#">monovalent inorganic cation transport</a>                                                                                                                         | <a href="#">RT</a> |  | 12    | 1.0E0   | 1.0E0     |
|                          | Annotation Cluster 120 | Enrichment Score: 0.89                                                                                                                                                        | <b>G</b>           |  | Count | P_Value | Benjamini |
| <input type="checkbox"/> | GOTERM_BP_ALL          | <a href="#">translational initiation</a>                                                                                                                                      | <a href="#">RT</a> |  | 15    | 3.2E-4  | 1.5E-2    |
| <input type="checkbox"/> | GOTERM_BP_ALL          | <a href="#">regulation of translational initiation</a>                                                                                                                        | <a href="#">RT</a> |  | 6     | 3.7E-2  | 5.9E-1    |
| <input type="checkbox"/> | SP_PIR_KEYWORDS        | <a href="#">translation regulation</a>                                                                                                                                        | <a href="#">RT</a> |  | 6     | 1.2E-1  | 6.5E-1    |
| <input type="checkbox"/> | GOTERM_BP_ALL          | <a href="#">regulation of biosynthetic process</a>                                                                                                                            | <a href="#">RT</a> |  | 17    | 6.3E-1  | 1.0E0     |
| <input type="checkbox"/> | GOTERM_BP_ALL          | <a href="#">regulation of cellular biosynthetic process</a>                                                                                                                   | <a href="#">RT</a> |  | 13    | 8.3E-1  | 1.0E0     |
| <input type="checkbox"/> | GOTERM_BP_ALL          | <a href="#">regulation of translation</a>                                                                                                                                     | <a href="#">RT</a> |  | 12    | 8.4E-1  | 1.0E0     |
| <input type="checkbox"/> | GOTERM_BP_ALL          | <a href="#">regulation of protein metabolic process</a>                                                                                                                       | <a href="#">RT</a> |  | 22    | 8.7E-1  | 1.0E0     |
|                          | Annotation Cluster 121 | Enrichment Score: 0.89                                                                                                                                                        | <b>G</b>           |  | Count | P_Value | Benjamini |
| <input type="checkbox"/> | UP_SEQ_FEATURE         | repeat:WD 10                                                                                                                                                                  | <a href="#">RT</a> |  | 3     | 7.9E-2  | 1.0E0     |
| <input type="checkbox"/> | UP_SEQ_FEATURE         | repeat:WD 11                                                                                                                                                                  | <a href="#">RT</a> |  | 3     | 7.9E-2  | 1.0E0     |
| <input type="checkbox"/> | UP_SEQ_FEATURE         | repeat:WD 9                                                                                                                                                                   | <a href="#">RT</a> |  | 3     | 1.1E-1  | 1.0E0     |
| <input type="checkbox"/> | UP_SEQ_FEATURE         | repeat:WD 8                                                                                                                                                                   | <a href="#">RT</a> |  | 3     | 4.1E-1  | 1.0E0     |
|                          | Annotation Cluster 122 | Enrichment Score: 0.87                                                                                                                                                        | <b>G</b>           |  | Count | P_Value | Benjamini |
| <input type="checkbox"/> | GOTERM_MF_ALL          | <a href="#">superoxide dismutase activity</a>                                                                                                                                 | <a href="#">RT</a> |  | 4     | 5.2E-2  | 7.3E-1    |
| <input type="checkbox"/> | GOTERM_MF_ALL          | <a href="#">oxidoreductase activity, acting on superoxide radicals as acceptor</a>                                                                                            | <a href="#">RT</a> |  | 4     | 5.2E-2  | 7.3E-1    |
| <input type="checkbox"/> | GOTERM_MF_ALL          | <a href="#">copper, zinc superoxide dismutase activity</a>                                                                                                                    | <a href="#">RT</a> |  | 3     | 1.2E-1  | 9.1E-1    |
| <input type="checkbox"/> | GOTERM_BP_ALL          | <a href="#">superoxide metabolic process</a>                                                                                                                                  | <a href="#">RT</a> |  | 4     | 3.0E-1  | 9.9E-1    |
| <input type="checkbox"/> | GOTERM_BP_ALL          | <a href="#">oxygen and reactive oxygen species metabolic process</a>                                                                                                          | <a href="#">RT</a> |  | 5     | 4.2E-1  | 1.0E0     |
|                          | Annotation Cluster 123 | Enrichment Score: 0.86                                                                                                                                                        | <b>G</b>           |  | Count | P_Value | Benjamini |
| <input type="checkbox"/> | KEGG_PATHWAY           | <a href="#">Polyunsaturated fatty acid biosynthesis</a>                                                                                                                       | <a href="#">RT</a> |  | 6     | 1.9E-2  | 2.5E-1    |
| <input type="checkbox"/> | GOTERM_MF_ALL          | <a href="#">stearoyl-CoA 9-desaturase activity</a>                                                                                                                            | <a href="#">RT</a> |  | 3     | 6.6E-2  | 7.6E-1    |
| <input type="checkbox"/> | INTERPRO               | <a href="#">Fatty acid desaturase, type 1, N-terminal</a>                                                                                                                     | <a href="#">RT</a> |  | 3     | 8.7E-2  | 9.9E-1    |
| <input type="checkbox"/> | INTERPRO               | <a href="#">Fatty acid desaturase, type 1</a>                                                                                                                                 | <a href="#">RT</a> |  | 3     | 1.2E-1  | 1.0E0     |
| <input type="checkbox"/> | GOTERM_MF_ALL          | <a href="#">oxidoreductase activity, acting on paired donors, with oxidation of a pair of donors resulting in the reduction of molecular oxygen to two molecules of water</a> | <a href="#">RT</a> |  | 3     | 1.2E-1  | 9.1E-1    |
| <input type="checkbox"/> | KEGG_PATHWAY           | <a href="#">PPAR signaling pathway</a>                                                                                                                                        | <a href="#">RT</a> |  | 8     | 5.9E-1  | 9.8E-1    |
| <input type="checkbox"/> | GOTERM_MF_ALL          | <a href="#">oxidoreductase activity, acting on paired donors, with incorporation or reduction of molecular oxygen</a>                                                         | <a href="#">RT</a> |  | 8     | 9.6E-1  | 1.0E0     |
|                          | Annotation Cluster 124 | Enrichment Score: 0.83                                                                                                                                                        | <b>G</b>           |  | Count | P_Value | Benjamini |
| <input type="checkbox"/> | GOTERM_CC_ALL          | <a href="#">proteasome complex (sensu Eukaryota)</a>                                                                                                                          | <a href="#">RT</a> |  | 9     | 7.0E-3  | 6.7E-2    |

|                          |                        |                                                                                    |    |  |       |         |           |
|--------------------------|------------------------|------------------------------------------------------------------------------------|----|--|-------|---------|-----------|
| <input type="checkbox"/> | INTERPRO               | <a href="#">20S proteasome, A and B subunits</a>                                   | RT |  | 4     | 2.2E-1  | 1.0E0     |
| <input type="checkbox"/> | SP_PIR_KEYWORDS        | <a href="#">Threonine protease</a>                                                 | RT |  | 4     | 2.7E-1  | 9.0E-1    |
| <input type="checkbox"/> | INTERPRO               | <a href="#">Peptidase T1A, proteasome beta-subunit</a>                             | RT |  | 3     | 2.7E-1  | 1.0E0     |
| <input type="checkbox"/> | GOTERM_CC_ALL          | <a href="#">proteasome core complex (sensu Eukaryota)</a>                          | RT |  | 4     | 2.8E-1  | 8.7E-1    |
| <input type="checkbox"/> | GOTERM_MF_ALL          | <a href="#">threonine endopeptidase activity</a>                                   | RT |  | 4     | 3.1E-1  | 9.9E-1    |
|                          | Annotation Cluster 125 | Enrichment Score: 0.82                                                             | G  |  | Count | P_Value | Benjamini |
| <input type="checkbox"/> | GOTERM_MF_ALL          | <a href="#">histone methyltransferase activity</a>                                 | RT |  | 8     | 7.9E-3  | 2.6E-1    |
| <input type="checkbox"/> | GOTERM_MF_ALL          | <a href="#">protein methyltransferase activity</a>                                 | RT |  | 9     | 2.0E-2  | 4.7E-1    |
| <input type="checkbox"/> | GOTERM_MF_ALL          | <a href="#">N-methyltransferase activity</a>                                       | RT |  | 8     | 6.1E-2  | 7.5E-1    |
| <input type="checkbox"/> | SMART                  | <a href="#">SET</a>                                                                | RT |  | 6     | 1.3E-1  | 9.5E-1    |
| <input type="checkbox"/> | SMART                  | <a href="#">PostSET</a>                                                            | RT |  | 3     | 2.1E-1  | 9.8E-1    |
| <input type="checkbox"/> | INTERPRO               | <a href="#">SET</a>                                                                | RT |  | 6     | 2.7E-1  | 1.0E0     |
| <input type="checkbox"/> | INTERPRO               | <a href="#">Post-SET zinc-binding region</a>                                       | RT |  | 3     | 3.1E-1  | 1.0E0     |
| <input type="checkbox"/> | UP_SEQ_FEATURE         | domain:SET                                                                         | RT |  | 3     | 4.1E-1  | 1.0E0     |
| <input type="checkbox"/> | GOTERM_MF_ALL          | <a href="#">histone-lysine N-methyltransferase activity</a>                        | RT |  | 3     | 4.8E-1  | 1.0E0     |
| <input type="checkbox"/> | GOTERM_MF_ALL          | <a href="#">lysine N-methyltransferase activity</a>                                | RT |  | 3     | 4.8E-1  | 1.0E0     |
| <input type="checkbox"/> | GOTERM_MF_ALL          | <a href="#">protein-lysine N-methyltransferase activity</a>                        | RT |  | 3     | 4.8E-1  | 1.0E0     |
|                          | Annotation Cluster 126 | Enrichment Score: 0.81                                                             | G  |  | Count | P_Value | Benjamini |
| <input type="checkbox"/> | UP_SEQ_FEATURE         | domain:Rhodanese                                                                   | RT |  | 5     | 2.4E-2  | 1.0E0     |
| <input type="checkbox"/> | SMART                  | <a href="#">RHOD</a>                                                               | RT |  | 5     | 4.0E-2  | 6.6E-1    |
| <input type="checkbox"/> | INTERPRO               | <a href="#">Rhodanese-like</a>                                                     | RT |  | 4     | 2.2E-1  | 1.0E0     |
| <input type="checkbox"/> | GOTERM_MF_ALL          | <a href="#">protein tyrosine phosphatase activity</a>                              | RT |  | 9     | 5.4E-1  | 1.0E0     |
| <input type="checkbox"/> | SP_PIR_KEYWORDS        | <a href="#">protein phosphatase</a>                                                | RT |  | 9     | 7.6E-1  | 1.0E0     |
|                          | Annotation Cluster 127 | Enrichment Score: 0.81                                                             | G  |  | Count | P_Value | Benjamini |
| <input type="checkbox"/> | GOTERM_CC_ALL          | <a href="#">DNA-directed RNA polymerase complex</a>                                | RT |  | 4     | 1.4E-1  | 6.5E-1    |
| <input type="checkbox"/> | GOTERM_CC_ALL          | <a href="#">nuclear DNA-directed RNA polymerase complex</a>                        | RT |  | 4     | 1.4E-1  | 6.5E-1    |
| <input type="checkbox"/> | GOTERM_CC_ALL          | <a href="#">RNA polymerase complex</a>                                             | RT |  | 4     | 1.9E-1  | 7.3E-1    |
|                          | Annotation Cluster 128 | Enrichment Score: 0.8                                                              | G  |  | Count | P_Value | Benjamini |
| <input type="checkbox"/> | SMART                  | <a href="#">PHB</a>                                                                | RT |  | 3     | 1.4E-1  | 9.5E-1    |
| <input type="checkbox"/> | PIR_SUPERFAMILY        | PIRSF005651:membrane protease subunits, stomatin/prohibitin homologs               | RT |  | 3     | 1.4E-1  | 1.0E0     |
| <input type="checkbox"/> | INTERPRO               | <a href="#">Band 7 protein</a>                                                     | RT |  | 3     | 2.1E-1  | 1.0E0     |
|                          | Annotation Cluster 129 | Enrichment Score: 0.78                                                             | G  |  | Count | P_Value | Benjamini |
| <input type="checkbox"/> | SMART                  | <a href="#">PINT</a>                                                               | RT |  | 4     | 9.9E-2  | 9.1E-1    |
| <input type="checkbox"/> | INTERPRO               | <a href="#">Proteasome component region PCI</a>                                    | RT |  | 4     | 1.5E-1  | 1.0E0     |
| <input type="checkbox"/> | UP_SEQ_FEATURE         | domain:PCI                                                                         | RT |  | 3     | 2.9E-1  | 1.0E0     |
|                          | Annotation Cluster 130 | Enrichment Score: 0.77                                                             | G  |  | Count | P_Value | Benjamini |
| <input type="checkbox"/> | SMART                  | <a href="#">UBQ</a>                                                                | RT |  | 7     | 1.2E-1  | 9.4E-1    |
| <input type="checkbox"/> | UP_SEQ_FEATURE         | domain:Ubiquitin-like                                                              | RT |  | 5     | 1.8E-1  | 1.0E0     |
| <input type="checkbox"/> | INTERPRO               | <a href="#">Ubiquitin</a>                                                          | RT |  | 7     | 2.3E-1  | 1.0E0     |
|                          | Annotation Cluster 131 | Enrichment Score: 0.76                                                             | G  |  | Count | P_Value | Benjamini |
| <input type="checkbox"/> | BIOCARTA               | <a href="#">RB Tumor Suppressor/Checkpoint Signaling in response to DNA damage</a> | RT |  | 5     | 2.5E-2  | 4.0E-1    |
| <input type="checkbox"/> | GOTERM_MF_ALL          | <a href="#">cyclin-dependent protein kinase activity</a>                           | RT |  | 5     | 2.6E-1  | 9.9E-1    |
| <input type="checkbox"/> | PIR_SUPERFAMILY        | PIRSF000564:kinase-related transforming protein                                    | RT |  | 3     | 8.4E-1  | 1.0E0     |
|                          | Annotation Cluster 132 | Enrichment Score: 0.75                                                             | G  |  | Count | P_Value | Benjamini |
| <input type="checkbox"/> | GOTERM_BP_ALL          | <a href="#">maintenance of protein localization</a>                                | RT |  | 4     | 1.1E-1  | 8.8E-1    |
| <input type="checkbox"/> | GOTERM_BP_ALL          | <a href="#">maintenance of localization</a>                                        | RT |  | 5     | 1.2E-1  | 9.0E-1    |
| <input type="checkbox"/> | GOTERM_BP_ALL          | <a href="#">maintenance of cellular protein localization</a>                       | RT |  | 3     | 2.3E-1  | 9.8E-1    |



| <input type="checkbox"/> |                        |                                                                                                    |          |  |  |  |  |  |       |         |           |
|--------------------------|------------------------|----------------------------------------------------------------------------------------------------|----------|--|--|--|--|--|-------|---------|-----------|
| <input type="checkbox"/> | GOTERM_BP_ALL          | <a href="#">maintenance of cellular localization</a>                                               | RT       |  |  |  |  |  | 3     | 3.4E-1  | 1.0E0     |
|                          | Annotation Cluster 133 | Enrichment Score: 0.72                                                                             | <b>G</b> |  |  |  |  |  | Count | P_Value | Benjamini |
| <input type="checkbox"/> | GOTERM_MF_ALL          | <a href="#">GTPase activity</a>                                                                    | RT       |  |  |  |  |  | 23    | 1.2E-2  | 3.5E-1    |
| <input type="checkbox"/> | GOTERM_MF_ALL          | <a href="#">GTP binding</a>                                                                        | RT       |  |  |  |  |  | 35    | 2.1E-1  | 9.8E-1    |
| <input type="checkbox"/> | GOTERM_MF_ALL          | <a href="#">guanyl ribonucleotide binding</a>                                                      | RT       |  |  |  |  |  | 35    | 2.4E-1  | 9.8E-1    |
| <input type="checkbox"/> | GOTERM_MF_ALL          | <a href="#">guanyl nucleotide binding</a>                                                          | RT       |  |  |  |  |  | 35    | 2.4E-1  | 9.8E-1    |
| <input type="checkbox"/> | SP_PIR_KEYWORDS        | <a href="#">GTP-binding</a>                                                                        | RT       |  |  |  |  |  | 27    | 4.6E-1  | 9.8E-1    |
| <input type="checkbox"/> | UP_SEQ_FEATURE         | nucleotide phosphate-binding region:GTP                                                            | RT       |  |  |  |  |  | 19    | 6.9E-1  | 1.0E0     |
|                          | Annotation Cluster 134 | Enrichment Score: 0.72                                                                             | <b>G</b> |  |  |  |  |  | Count | P_Value | Benjamini |
| <input type="checkbox"/> | GOTERM_MF_ALL          | <a href="#">oxidoreductase activity, acting on sulfur group of donors</a>                          | RT       |  |  |  |  |  | 6     | 4.1E-2  | 6.7E-1    |
| <input type="checkbox"/> | GOTERM_MF_ALL          | <a href="#">NADP binding</a>                                                                       | RT       |  |  |  |  |  | 5     | 5.8E-2  | 7.4E-1    |
| <input type="checkbox"/> | INTERPRO               | <a href="#">Mercuric reductase</a>                                                                 | RT       |  |  |  |  |  | 3     | 6.2E-2  | 9.8E-1    |
| <input type="checkbox"/> | INTERPRO               | <a href="#">Pyridine nucleotide-disulphide oxidoreductase, class I, active site</a>                | RT       |  |  |  |  |  | 3     | 6.2E-2  | 9.8E-1    |
| <input type="checkbox"/> | INTERPRO               | <a href="#">Pyridine nucleotide-disulphide oxidoreductase dimerisation region</a>                  | RT       |  |  |  |  |  | 3     | 1.2E-1  | 1.0E0     |
| <input type="checkbox"/> | GOTERM_MF_ALL          | <a href="#">oxidoreductase activity, acting on sulfur group of donors, NAD or NADP as acceptor</a> | RT       |  |  |  |  |  | 3     | 1.2E-1  | 9.1E-1    |
| <input type="checkbox"/> | INTERPRO               | <a href="#">Pyridine nucleotide-disulphide oxidoreductase, NAD-binding region</a>                  | RT       |  |  |  |  |  | 3     | 3.1E-1  | 1.0E0     |
| <input type="checkbox"/> | SP_PIR_KEYWORDS        | <a href="#">fad</a>                                                                                | RT       |  |  |  |  |  | 10    | 5.2E-1  | 9.9E-1    |
| <input type="checkbox"/> | UP_SEQ_FEATURE         | nucleotide phosphate-binding region:FAD                                                            | RT       |  |  |  |  |  | 4     | 5.5E-1  | 1.0E0     |
| <input type="checkbox"/> | GOTERM_MF_ALL          | <a href="#">antioxidant activity</a>                                                               | RT       |  |  |  |  |  | 6     | 5.8E-1  | 1.0E0     |
| <input type="checkbox"/> | SP_PIR_KEYWORDS        | <a href="#">flavoprotein</a>                                                                       | RT       |  |  |  |  |  | 10    | 5.9E-1  | 1.0E0     |
| <input type="checkbox"/> | GOTERM_MF_ALL          | <a href="#">FAD binding</a>                                                                        | RT       |  |  |  |  |  | 6     | 6.6E-1  | 1.0E0     |
|                          | Annotation Cluster 135 | Enrichment Score: 0.71                                                                             | <b>G</b> |  |  |  |  |  | Count | P_Value | Benjamini |
| <input type="checkbox"/> | GOTERM_MF_ALL          | <a href="#">transferase activity, transferring pentosyl groups</a>                                 | RT       |  |  |  |  |  | 10    | 1.0E-2  | 3.1E-1    |
| <input type="checkbox"/> | GOTERM_MF_ALL          | <a href="#">transferase activity, transferring glycosyl groups</a>                                 | RT       |  |  |  |  |  | 19    | 7.8E-1  | 1.0E0     |
| <input type="checkbox"/> | SP_PIR_KEYWORDS        | <a href="#">glycosyltransferase</a>                                                                | RT       |  |  |  |  |  | 13    | 9.1E-1  | 1.0E0     |
|                          | Annotation Cluster 136 | Enrichment Score: 0.7                                                                              | <b>G</b> |  |  |  |  |  | Count | P_Value | Benjamini |
| <input type="checkbox"/> | PIR_SUPERFAMILY        | PIRSF005673:pendulin                                                                               | RT       |  |  |  |  |  | 3     | 7.6E-2  | 1.0E0     |
| <input type="checkbox"/> | UP_SEQ_FEATURE         | repeat:ARM 10; atypical                                                                            | RT       |  |  |  |  |  | 3     | 7.9E-2  | 1.0E0     |
| <input type="checkbox"/> | UP_SEQ_FEATURE         | repeat:ARM 1; truncated                                                                            | RT       |  |  |  |  |  | 3     | 7.9E-2  | 1.0E0     |
| <input type="checkbox"/> | UP_SEQ_FEATURE         | domain:IBB                                                                                         | RT       |  |  |  |  |  | 3     | 7.9E-2  | 1.0E0     |
| <input type="checkbox"/> | UP_SEQ_FEATURE         | region of interest:NLS binding site (minor)                                                        | RT       |  |  |  |  |  | 3     | 7.9E-2  | 1.0E0     |
| <input type="checkbox"/> | UP_SEQ_FEATURE         | region of interest:NLS binding site (major)                                                        | RT       |  |  |  |  |  | 3     | 7.9E-2  | 1.0E0     |
| <input type="checkbox"/> | INTERPRO               | <a href="#">Importin-alpha-like, importin-beta-binding region</a>                                  | RT       |  |  |  |  |  | 3     | 1.2E-1  | 1.0E0     |
| <input type="checkbox"/> | UP_SEQ_FEATURE         | repeat:ARM 4                                                                                       | RT       |  |  |  |  |  | 4     | 2.3E-1  | 1.0E0     |
| <input type="checkbox"/> | UP_SEQ_FEATURE         | repeat:ARM 9                                                                                       | RT       |  |  |  |  |  | 3     | 2.6E-1  | 1.0E0     |
| <input type="checkbox"/> | UP_SEQ_FEATURE         | repeat:ARM 8                                                                                       | RT       |  |  |  |  |  | 3     | 3.3E-1  | 1.0E0     |
| <input type="checkbox"/> | SMART                  | <a href="#">ARM</a>                                                                                | RT       |  |  |  |  |  | 4     | 3.4E-1  | 1.0E0     |
| <input type="checkbox"/> | UP_SEQ_FEATURE         | repeat:ARM 3                                                                                       | RT       |  |  |  |  |  | 4     | 3.4E-1  | 1.0E0     |
| <input type="checkbox"/> | UP_SEQ_FEATURE         | repeat:ARM 2                                                                                       | RT       |  |  |  |  |  | 4     | 3.4E-1  | 1.0E0     |
| <input type="checkbox"/> | COG_ONTOLOGY           | <a href="#">Intracellular trafficking and secretion</a>                                            | RT       |  |  |  |  |  | 9     | 3.4E-1  | 9.6E-1    |
| <input type="checkbox"/> | UP_SEQ_FEATURE         | repeat:ARM 6                                                                                       | RT       |  |  |  |  |  | 3     | 4.1E-1  | 1.0E0     |
| <input type="checkbox"/> | UP_SEQ_FEATURE         | repeat:ARM 7                                                                                       | RT       |  |  |  |  |  | 3     | 4.1E-1  | 1.0E0     |
| <input type="checkbox"/> | UP_SEQ_FEATURE         | repeat:ARM 5                                                                                       | RT       |  |  |  |  |  | 3     | 4.4E-1  | 1.0E0     |
| <input type="checkbox"/> | INTERPRO               | <a href="#">Armadillo</a>                                                                          | RT       |  |  |  |  |  | 4     | 5.0E-1  | 1.0E0     |
|                          | Annotation Cluster 137 | Enrichment Score: 0.67                                                                             | <b>G</b> |  |  |  |  |  | Count | P_Value | Benjamini |
| <input type="checkbox"/> | GOTERM_MF_ALL          | <a href="#">poly(A) binding</a>                                                                    | RT       |  |  |  |  |  | 3     | 1.2E-1  | 9.1E-1    |

|                          |                 |                                                                                       |                        |          | Count | P_Value | Benjamini |
|--------------------------|-----------------|---------------------------------------------------------------------------------------|------------------------|----------|-------|---------|-----------|
| <input type="checkbox"/> | GOTERM_MF_ALL   | <a href="#">mRNA binding</a>                                                          | <a href="#">RT</a>     |          | 6     | 2.0E-1  | 9.7E-1    |
| <input type="checkbox"/> | GOTERM_MF_ALL   | <a href="#">single-stranded RNA binding</a>                                           | <a href="#">RT</a>     |          | 3     | 3.9E-1  | 1.0E0     |
|                          |                 | Annotation Cluster 138                                                                | Enrichment Score: 0.67 | <b>G</b> |       |         |           |
| <input type="checkbox"/> | GOTERM_MF_ALL   | <a href="#">transferase activity</a>                                                  | <a href="#">RT</a>     |          | 213   | 4.2E-6  | 3.9E-4    |
| <input type="checkbox"/> | SP_PIR_KEYWORDS | <a href="#">transferase</a>                                                           | <a href="#">RT</a>     |          | 150   | 1.6E-3  | 2.2E-2    |
| <input type="checkbox"/> | GOTERM_MF_ALL   | <a href="#">transferase activity, transferring phosphorus-containing groups</a>       | <a href="#">RT</a>     |          | 117   | 2.8E-3  | 1.2E-1    |
| <input type="checkbox"/> | GOTERM_MF_ALL   | <a href="#">kinase activity</a>                                                       | <a href="#">RT</a>     |          | 88    | 1.6E-1  | 9.4E-1    |
| <input type="checkbox"/> | SMART           | <a href="#">S TKc</a>                                                                 | <a href="#">RT</a>     |          | 27    | 3.4E-1  | 1.0E0     |
| <input type="checkbox"/> | INTERPRO        | <a href="#">Serine/threonine protein kinase, active site</a>                          | <a href="#">RT</a>     |          | 25    | 3.5E-1  | 1.0E0     |
| <input type="checkbox"/> | INTERPRO        | <a href="#">Serine/threonine protein kinase</a>                                       | <a href="#">RT</a>     |          | 19    | 5.3E-1  | 1.0E0     |
| <input type="checkbox"/> | UP_SEQ_FEATURE  | binding site:ATP                                                                      | <a href="#">RT</a>     |          | 37    | 5.6E-1  | 1.0E0     |
| <input type="checkbox"/> | SP_PIR_KEYWORDS | <a href="#">kinase</a>                                                                | <a href="#">RT</a>     |          | 65    | 5.7E-1  | 9.9E-1    |
| <input type="checkbox"/> | SP_PIR_KEYWORDS | <a href="#">Serine/threonine-protein kinase</a>                                       | <a href="#">RT</a>     |          | 32    | 6.3E-1  | 1.0E0     |
| <input type="checkbox"/> | UP_SEQ_FEATURE  | active site:Proton acceptor                                                           | <a href="#">RT</a>     |          | 44    | 7.5E-1  | 1.0E0     |
| <input type="checkbox"/> | UP_SEQ_FEATURE  | domain:Protein kinase                                                                 | <a href="#">RT</a>     |          | 31    | 7.7E-1  | 1.0E0     |
| <input type="checkbox"/> | INTERPRO        | <a href="#">Protein kinase, core</a>                                                  | <a href="#">RT</a>     |          | 27    | 7.9E-1  | 1.0E0     |
| <input type="checkbox"/> | GOTERM_MF_ALL   | <a href="#">protein serine/threonine kinase activity</a>                              | <a href="#">RT</a>     |          | 38    | 8.5E-1  | 1.0E0     |
| <input type="checkbox"/> | GOTERM_MF_ALL   | <a href="#">phosphotransferase activity, alcohol group as acceptor</a>                | <a href="#">RT</a>     |          | 56    | 8.6E-1  | 1.0E0     |
| <input type="checkbox"/> | GOTERM_MF_ALL   | <a href="#">protein kinase activity</a>                                               | <a href="#">RT</a>     |          | 47    | 8.8E-1  | 1.0E0     |
| <input type="checkbox"/> | GOTERM_BP_ALL   | <a href="#">phosphorus metabolic process</a>                                          | <a href="#">RT</a>     |          | 68    | 9.3E-1  | 1.0E0     |
| <input type="checkbox"/> | GOTERM_BP_ALL   | <a href="#">phosphate metabolic process</a>                                           | <a href="#">RT</a>     |          | 68    | 9.3E-1  | 1.0E0     |
| <input type="checkbox"/> | GOTERM_BP_ALL   | <a href="#">phosphorylation</a>                                                       | <a href="#">RT</a>     |          | 54    | 9.6E-1  | 1.0E0     |
| <input type="checkbox"/> | GOTERM_MF_ALL   | <a href="#">protein-tyrosine kinase activity</a>                                      | <a href="#">RT</a>     |          | 20    | 9.8E-1  | 1.0E0     |
| <input type="checkbox"/> | GOTERM_BP_ALL   | <a href="#">protein amino acid phosphorylation</a>                                    | <a href="#">RT</a>     |          | 43    | 9.9E-1  | 1.0E0     |
|                          |                 | Annotation Cluster 139                                                                | Enrichment Score: 0.66 | <b>G</b> |       |         |           |
| <input type="checkbox"/> | GOTERM_MF_ALL   | <a href="#">electron carrier activity</a>                                             | <a href="#">RT</a>     |          | 27    | 2.3E-2  | 4.9E-1    |
| <input type="checkbox"/> | GOTERM_BP_ALL   | <a href="#">generation of precursor metabolites and energy</a>                        | <a href="#">RT</a>     |          | 47    | 6.2E-1  | 1.0E0     |
| <input type="checkbox"/> | GOTERM_BP_ALL   | <a href="#">electron transport</a>                                                    | <a href="#">RT</a>     |          | 35    | 7.3E-1  | 1.0E0     |
|                          |                 | Annotation Cluster 140                                                                | Enrichment Score: 0.64 | <b>G</b> |       |         |           |
| <input type="checkbox"/> | GOTERM_MF_ALL   | <a href="#">Ran GTPase binding</a>                                                    | <a href="#">RT</a>     |          | 4     | 1.9E-2  | 4.6E-1    |
| <input type="checkbox"/> | GOTERM_MF_ALL   | <a href="#">Ras GTPase binding</a>                                                    | <a href="#">RT</a>     |          | 7     | 3.6E-1  | 1.0E0     |
| <input type="checkbox"/> | GOTERM_MF_ALL   | <a href="#">small GTPase binding</a>                                                  | <a href="#">RT</a>     |          | 7     | 4.1E-1  | 1.0E0     |
| <input type="checkbox"/> | GOTERM_MF_ALL   | <a href="#">GTPase binding</a>                                                        | <a href="#">RT</a>     |          | 7     | 4.6E-1  | 1.0E0     |
| <input type="checkbox"/> | GOTERM_MF_ALL   | <a href="#">enzyme binding</a>                                                        | <a href="#">RT</a>     |          | 20    | 4.9E-1  | 1.0E0     |
|                          |                 | Annotation Cluster 141                                                                | Enrichment Score: 0.64 | <b>G</b> |       |         |           |
| <input type="checkbox"/> | GOTERM_BP_ALL   | <a href="#">microtubule polymerization or depolymerization</a>                        | <a href="#">RT</a>     |          | 5     | 6.3E-2  | 7.4E-1    |
| <input type="checkbox"/> | GOTERM_BP_ALL   | <a href="#">microtubule depolymerization</a>                                          | <a href="#">RT</a>     |          | 4     | 1.1E-1  | 8.8E-1    |
| <input type="checkbox"/> | GOTERM_BP_ALL   | <a href="#">negative regulation of microtubule polymerization or depolymerization</a> | <a href="#">RT</a>     |          | 4     | 1.3E-1  | 9.1E-1    |
| <input type="checkbox"/> | GOTERM_BP_ALL   | <a href="#">regulation of microtubule polymerization or depolymerization</a>          | <a href="#">RT</a>     |          | 4     | 1.7E-1  | 9.6E-1    |
| <input type="checkbox"/> | GOTERM_BP_ALL   | <a href="#">protein depolymerization</a>                                              | <a href="#">RT</a>     |          | 6     | 2.6E-1  | 9.9E-1    |
| <input type="checkbox"/> | GOTERM_BP_ALL   | <a href="#">negative regulation of microtubule depolymerization</a>                   | <a href="#">RT</a>     |          | 3     | 3.0E-1  | 9.9E-1    |
| <input type="checkbox"/> | GOTERM_BP_ALL   | <a href="#">regulation of microtubule depolymerization</a>                            | <a href="#">RT</a>     |          | 3     | 3.0E-1  | 9.9E-1    |
| <input type="checkbox"/> | GOTERM_BP_ALL   | <a href="#">negative regulation of cellular component organization and biogenesis</a> | <a href="#">RT</a>     |          | 6     | 3.2E-1  | 9.9E-1    |
| <input type="checkbox"/> | GOTERM_BP_ALL   | <a href="#">regulation of cellular component organization and biogenesis</a>          | <a href="#">RT</a>     |          | 8     | 4.9E-1  | 1.0E0     |
| <input type="checkbox"/> | GOTERM_BP_ALL   | <a href="#">negative regulation of protein metabolic process</a>                      | <a href="#">RT</a>     |          | 8     | 7.0E-1  | 1.0E0     |
|                          |                 | Annotation Cluster 142                                                                | Enrichment Score: 0.63 | <b>G</b> |       |         |           |

|                          |                 |                                                                                              |                    |  |       |         |           |
|--------------------------|-----------------|----------------------------------------------------------------------------------------------|--------------------|--|-------|---------|-----------|
| <input type="checkbox"/> | UP_SEQ_FEATURE  | repeat:RCC1 6                                                                                | <a href="#">RT</a> |  | 3     | 1.4E-1  | 1.0E0     |
| <input type="checkbox"/> | UP_SEQ_FEATURE  | repeat:RCC1 5                                                                                | <a href="#">RT</a> |  | 3     | 2.6E-1  | 1.0E0     |
| <input type="checkbox"/> | UP_SEQ_FEATURE  | repeat:RCC1 4                                                                                | <a href="#">RT</a> |  | 3     | 2.6E-1  | 1.0E0     |
| <input type="checkbox"/> | UP_SEQ_FEATURE  | repeat:RCC1 3                                                                                | <a href="#">RT</a> |  | 3     | 2.6E-1  | 1.0E0     |
| <input type="checkbox"/> | UP_SEQ_FEATURE  | repeat:RCC1 2                                                                                | <a href="#">RT</a> |  | 3     | 2.6E-1  | 1.0E0     |
| <input type="checkbox"/> | UP_SEQ_FEATURE  | repeat:RCC1 1                                                                                | <a href="#">RT</a> |  | 3     | 2.6E-1  | 1.0E0     |
| Annotation Cluster 143   |                 | Enrichment Score: 0.61                                                                       | <b>G</b>           |  | Count | P_Value | Benjamini |
| <input type="checkbox"/> | INTERPRO        | <a href="#">Pre-ATP-grasp fold</a>                                                           | <a href="#">RT</a> |  | 3     | 1.5E-1  | 1.0E0     |
| <input type="checkbox"/> | INTERPRO        | <a href="#">ATP-grasp fold</a>                                                               | <a href="#">RT</a> |  | 3     | 3.1E-1  | 1.0E0     |
| <input type="checkbox"/> | INTERPRO        | <a href="#">ATP-grasp fold, subdomain 2</a>                                                  | <a href="#">RT</a> |  | 3     | 3.4E-1  | 1.0E0     |
| Annotation Cluster 144   |                 | Enrichment Score: 0.6                                                                        | <b>G</b>           |  | Count | P_Value | Benjamini |
| <input type="checkbox"/> | GOTERM_MF_ALL   | <a href="#">DNA topoisomerase (ATP-hydrolyzing) activity</a>                                 | <a href="#">RT</a> |  | 3     | 1.9E-1  | 9.7E-1    |
| <input type="checkbox"/> | GOTERM_MF_ALL   | <a href="#">DNA topoisomerase activity</a>                                                   | <a href="#">RT</a> |  | 3     | 2.6E-1  | 9.9E-1    |
| <input type="checkbox"/> | GOTERM_BP_ALL   | <a href="#">DNA topological change</a>                                                       | <a href="#">RT</a> |  | 3     | 3.4E-1  | 1.0E0     |
| Annotation Cluster 145   |                 | Enrichment Score: 0.58                                                                       | <b>G</b>           |  | Count | P_Value | Benjamini |
| <input type="checkbox"/> | SMART           | <a href="#">EXOIII</a>                                                                       | <a href="#">RT</a> |  | 3     | 2.1E-1  | 9.8E-1    |
| <input type="checkbox"/> | INTERPRO        | <a href="#">Exonuclease</a>                                                                  | <a href="#">RT</a> |  | 3     | 2.7E-1  | 1.0E0     |
| <input type="checkbox"/> | INTERPRO        | <a href="#">Exonuclease, RNase T and DNA polymerase III</a>                                  | <a href="#">RT</a> |  | 3     | 3.1E-1  | 1.0E0     |
| Annotation Cluster 146   |                 | Enrichment Score: 0.58                                                                       | <b>G</b>           |  | Count | P_Value | Benjamini |
| <input type="checkbox"/> | GOTERM_BP_ALL   | <a href="#">viral reproductive process</a>                                                   | <a href="#">RT</a> |  | 4     | 2.0E-1  | 9.7E-1    |
| <input type="checkbox"/> | GOTERM_BP_ALL   | <a href="#">viral reproduction</a>                                                           | <a href="#">RT</a> |  | 4     | 2.7E-1  | 9.9E-1    |
| <input type="checkbox"/> | GOTERM_BP_ALL   | <a href="#">viral infectious cycle</a>                                                       | <a href="#">RT</a> |  | 3     | 3.4E-1  | 1.0E0     |
| Annotation Cluster 147   |                 | Enrichment Score: 0.56                                                                       | <b>G</b>           |  | Count | P_Value | Benjamini |
| <input type="checkbox"/> | GOTERM_BP_ALL   | <a href="#">DNA damage response, signal transduction</a>                                     | <a href="#">RT</a> |  | 8     | 7.6E-2  | 7.8E-1    |
| <input type="checkbox"/> | GOTERM_BP_ALL   | <a href="#">DNA damage response, signal transduction resulting in induction of apoptosis</a> | <a href="#">RT</a> |  | 3     | 5.0E-1  | 1.0E0     |
| <input type="checkbox"/> | GOTERM_BP_ALL   | <a href="#">induction of apoptosis by intracellular signals</a>                              | <a href="#">RT</a> |  | 4     | 5.5E-1  | 1.0E0     |
| Annotation Cluster 148   |                 | Enrichment Score: 0.56                                                                       | <b>G</b>           |  | Count | P_Value | Benjamini |
| <input type="checkbox"/> | GOTERM_BP_ALL   | <a href="#">I-kappaB kinase/NF-kappaB cascade</a>                                            | <a href="#">RT</a> |  | 11    | 7.6E-2  | 7.8E-1    |
| <input type="checkbox"/> | GOTERM_BP_ALL   | <a href="#">positive regulation of I-kappaB kinase/NF-kappaB cascade</a>                     | <a href="#">RT</a> |  | 7     | 1.5E-1  | 9.4E-1    |
| <input type="checkbox"/> | GOTERM_BP_ALL   | <a href="#">regulation of I-kappaB kinase/NF-kappaB cascade</a>                              | <a href="#">RT</a> |  | 7     | 1.8E-1  | 9.6E-1    |
| <input type="checkbox"/> | GOTERM_BP_ALL   | <a href="#">positive regulation of signal transduction</a>                                   | <a href="#">RT</a> |  | 9     | 7.7E-1  | 1.0E0     |
| <input type="checkbox"/> | GOTERM_BP_ALL   | <a href="#">protein kinase cascade</a>                                                       | <a href="#">RT</a> |  | 18    | 9.8E-1  | 1.0E0     |
| Annotation Cluster 149   |                 | Enrichment Score: 0.52                                                                       | <b>G</b>           |  | Count | P_Value | Benjamini |
| <input type="checkbox"/> | GOTERM_BP_ALL   | <a href="#">blastocyst growth</a>                                                            | <a href="#">RT</a> |  | 6     | 6.3E-3  | 1.7E-1    |
| <input type="checkbox"/> | GOTERM_BP_ALL   | <a href="#">glial cell differentiation</a>                                                   | <a href="#">RT</a> |  | 5     | 6.0E-1  | 1.0E0     |
| <input type="checkbox"/> | GOTERM_BP_ALL   | <a href="#">gliogenesis</a>                                                                  | <a href="#">RT</a> |  | 5     | 6.8E-1  | 1.0E0     |
| <input type="checkbox"/> | GOTERM_BP_ALL   | <a href="#">central nervous system development</a>                                           | <a href="#">RT</a> |  | 9     | 1.0E0   | 1.0E0     |
| <input type="checkbox"/> | GOTERM_BP_ALL   | <a href="#">neurogenesis</a>                                                                 | <a href="#">RT</a> |  | 13    | 1.0E0   | 1.0E0     |
| Annotation Cluster 150   |                 | Enrichment Score: 0.5                                                                        | <b>G</b>           |  | Count | P_Value | Benjamini |
| <input type="checkbox"/> | SP_PIR_KEYWORDS | <a href="#">pyridoxal phosphate</a>                                                          | <a href="#">RT</a> |  | 10    | 7.2E-2  | 4.8E-1    |
| <input type="checkbox"/> | UP_SEQ_FEATURE  | binding site:Pyridoxal phosphate (covalent)                                                  | <a href="#">RT</a> |  | 7     | 1.1E-1  | 1.0E0     |
| <input type="checkbox"/> | GOTERM_MF_ALL   | <a href="#">transferase activity, transferring nitrogenous groups</a>                        | <a href="#">RT</a> |  | 6     | 2.8E-1  | 9.9E-1    |
| <input type="checkbox"/> | INTERPRO        | <a href="#">Aminotransferase, class I and II</a>                                             | <a href="#">RT</a> |  | 3     | 3.7E-1  | 1.0E0     |
| <input type="checkbox"/> | GOTERM_MF_ALL   | <a href="#">transaminase activity</a>                                                        | <a href="#">RT</a> |  | 5     | 4.2E-1  | 1.0E0     |
| <input type="checkbox"/> | GOTERM_MF_ALL   | <a href="#">pyridoxal phosphate binding</a>                                                  | <a href="#">RT</a> |  | 6     | 4.4E-1  | 1.0E0     |
| <input type="checkbox"/> | GOTERM_MF_ALL   | <a href="#">vitamin binding</a>                                                              | <a href="#">RT</a> |  | 11    | 5.4E-1  | 1.0E0     |
| <input type="checkbox"/> | INTERPRO        | <a href="#">Pyridoxal phosphate-dependent</a>                                                | <a href="#">RT</a> |  | 4     | 5.5E-1  | 1.0E0     |

|                          |                        | <a href="#">transferase, major region, subdomain 1</a>                                                       | <a href="#">RT</a> |  |  |  |  | 4     | 3.3E-1  | 1.0E0     |
|--------------------------|------------------------|--------------------------------------------------------------------------------------------------------------|--------------------|--|--|--|--|-------|---------|-----------|
| <input type="checkbox"/> | <b>SP_PIR_KEYWORDS</b> | <a href="#">aminotransferase</a>                                                                             | <a href="#">RT</a> |  |  |  |  | 3     | 6.3E-1  | 1.0E0     |
|                          | Annotation Cluster 151 | Enrichment Score: 0.49                                                                                       | <b>G</b>           |  |  |  |  | Count | P_Value | Benjamini |
| <input type="checkbox"/> | <b>INTERPRO</b>        | <a href="#">WW</a>                                                                                           | <a href="#">RT</a> |  |  |  |  | 3     | 1.5E-1  | 1.0E0     |
| <input type="checkbox"/> | <b>SMART</b>           | <a href="#">WW</a>                                                                                           | <a href="#">RT</a> |  |  |  |  | 5     | 4.0E-1  | 1.0E0     |
| <input type="checkbox"/> | <b>INTERPRO</b>        | <a href="#">WW/Rsp5/WWP</a>                                                                                  | <a href="#">RT</a> |  |  |  |  | 5     | 5.8E-1  | 1.0E0     |
|                          | Annotation Cluster 152 | Enrichment Score: 0.49                                                                                       | <b>G</b>           |  |  |  |  | Count | P_Value | Benjamini |
| <input type="checkbox"/> | <b>GOTERM_MF_ALL</b>   | <a href="#">acetyltransferase activity</a>                                                                   | <a href="#">RT</a> |  |  |  |  | 10    | 1.5E-1  | 9.4E-1    |
| <input type="checkbox"/> | <b>GOTERM_BP_ALL</b>   | <a href="#">protein amino acid acetylation</a>                                                               | <a href="#">RT</a> |  |  |  |  | 4     | 1.7E-1  | 9.6E-1    |
| <input type="checkbox"/> | <b>GOTERM_BP_ALL</b>   | <a href="#">N-terminal protein amino acid modification</a>                                                   | <a href="#">RT</a> |  |  |  |  | 3     | 2.0E-1  | 9.7E-1    |
| <input type="checkbox"/> | <b>GOTERM_BP_ALL</b>   | <a href="#">protein amino acid acylation</a>                                                                 | <a href="#">RT</a> |  |  |  |  | 5     | 2.1E-1  | 9.7E-1    |
| <input type="checkbox"/> | <b>GOTERM_MF_ALL</b>   | <a href="#">N-acyltransferase activity</a>                                                                   | <a href="#">RT</a> |  |  |  |  | 8     | 3.4E-1  | 1.0E0     |
| <input type="checkbox"/> | <b>GOTERM_MF_ALL</b>   | <a href="#">N-acetyltransferase activity</a>                                                                 | <a href="#">RT</a> |  |  |  |  | 7     | 3.6E-1  | 1.0E0     |
| <input type="checkbox"/> | <b>GOTERM_MF_ALL</b>   | <a href="#">transferase activity, transferring acyl groups</a>                                               | <a href="#">RT</a> |  |  |  |  | 19    | 3.7E-1  | 1.0E0     |
| <input type="checkbox"/> | <b>GOTERM_MF_ALL</b>   | <a href="#">acyltransferase activity</a>                                                                     | <a href="#">RT</a> |  |  |  |  | 17    | 4.8E-1  | 1.0E0     |
| <input type="checkbox"/> | <b>GOTERM_MF_ALL</b>   | <a href="#">transferase activity, transferring groups other than amino-acyl groups</a>                       | <a href="#">RT</a> |  |  |  |  | 17    | 5.0E-1  | 1.0E0     |
| <input type="checkbox"/> | <b>SP_PIR_KEYWORDS</b> | <a href="#">acyltransferase</a>                                                                              | <a href="#">RT</a> |  |  |  |  | 13    | 6.0E-1  | 1.0E0     |
| <input type="checkbox"/> | <b>INTERPRO</b>        | <a href="#">GCN5-related N-acetyltransferase</a>                                                             | <a href="#">RT</a> |  |  |  |  | 3     | 6.0E-1  | 1.0E0     |
|                          | Annotation Cluster 153 | Enrichment Score: 0.48                                                                                       | <b>G</b>           |  |  |  |  | Count | P_Value | Benjamini |
| <input type="checkbox"/> | <b>GOTERM_BP_ALL</b>   | <a href="#">blastocyst development</a>                                                                       | <a href="#">RT</a> |  |  |  |  | 8     | 3.6E-2  | 5.8E-1    |
| <input type="checkbox"/> | <b>GOTERM_BP_ALL</b>   | <a href="#">in utero embryonic development</a>                                                               | <a href="#">RT</a> |  |  |  |  | 14    | 3.5E-1  | 1.0E0     |
| <input type="checkbox"/> | <b>GOTERM_BP_ALL</b>   | <a href="#">chordate embryonic development</a>                                                               | <a href="#">RT</a> |  |  |  |  | 21    | 5.5E-1  | 1.0E0     |
| <input type="checkbox"/> | <b>GOTERM_BP_ALL</b>   | <a href="#">embryonic development ending in birth or egg hatching</a>                                        | <a href="#">RT</a> |  |  |  |  | 21    | 5.8E-1  | 1.0E0     |
| <input type="checkbox"/> | <b>GOTERM_BP_ALL</b>   | <a href="#">embryonic development</a>                                                                        | <a href="#">RT</a> |  |  |  |  | 33    | 9.5E-1  | 1.0E0     |
|                          | Annotation Cluster 154 | Enrichment Score: 0.48                                                                                       | <b>G</b>           |  |  |  |  | Count | P_Value | Benjamini |
| <input type="checkbox"/> | <b>GOTERM_BP_ALL</b>   | <a href="#">negative regulation of nucleobase, nucleoside, nucleotide and nucleic acid metabolic process</a> | <a href="#">RT</a> |  |  |  |  | 38    | 4.8E-2  | 6.5E-1    |
| <input type="checkbox"/> | <b>GOTERM_BP_ALL</b>   | <a href="#">negative regulation of metabolic process</a>                                                     | <a href="#">RT</a> |  |  |  |  | 48    | 4.8E-2  | 6.5E-1    |
| <input type="checkbox"/> | <b>GOTERM_BP_ALL</b>   | <a href="#">negative regulation of cellular metabolic process</a>                                            | <a href="#">RT</a> |  |  |  |  | 41    | 1.0E-1  | 8.6E-1    |
| <input type="checkbox"/> | <b>GOTERM_BP_ALL</b>   | <a href="#">negative regulation of transcription</a>                                                         | <a href="#">RT</a> |  |  |  |  | 30    | 3.0E-1  | 9.9E-1    |
| <input type="checkbox"/> | <b>GOTERM_BP_ALL</b>   | <a href="#">negative regulation of transcription, DNA-dependent</a>                                          | <a href="#">RT</a> |  |  |  |  | 19    | 6.8E-1  | 1.0E0     |
| <input type="checkbox"/> | <b>GOTERM_BP_ALL</b>   | <a href="#">negative regulation of cellular process</a>                                                      | <a href="#">RT</a> |  |  |  |  | 86    | 7.0E-1  | 1.0E0     |
| <input type="checkbox"/> | <b>GOTERM_BP_ALL</b>   | <a href="#">negative regulation of biological process</a>                                                    | <a href="#">RT</a> |  |  |  |  | 92    | 7.0E-1  | 1.0E0     |
| <input type="checkbox"/> | <b>GOTERM_BP_ALL</b>   | <a href="#">negative regulation of transcription from RNA polymerase II promoter</a>                         | <a href="#">RT</a> |  |  |  |  | 13    | 7.4E-1  | 1.0E0     |
| <input type="checkbox"/> | <b>GOTERM_BP_ALL</b>   | <a href="#">transcription from RNA polymerase II promoter</a>                                                | <a href="#">RT</a> |  |  |  |  | 35    | 9.5E-1  | 1.0E0     |
| <input type="checkbox"/> | <b>GOTERM_BP_ALL</b>   | <a href="#">regulation of transcription from RNA polymerase II promoter</a>                                  | <a href="#">RT</a> |  |  |  |  | 29    | 9.8E-1  | 1.0E0     |
|                          | Annotation Cluster 155 | Enrichment Score: 0.48                                                                                       | <b>G</b>           |  |  |  |  | Count | P_Value | Benjamini |
| <input type="checkbox"/> | <b>BIOCARTA</b>        | <a href="#">Apoptotic Signaling in Response to DNA Damage</a>                                                | <a href="#">RT</a> |  |  |  |  | 7     | 1.6E-2  | 3.7E-1    |
| <input type="checkbox"/> | <b>BIOCARTA</b>        | <a href="#">Caspase Cascade in Apoptosis</a>                                                                 | <a href="#">RT</a> |  |  |  |  | 5     | 2.4E-1  | 8.8E-1    |
| <input type="checkbox"/> | <b>BIOCARTA</b>        | <a href="#">TNFR1 Signaling Pathway</a>                                                                      | <a href="#">RT</a> |  |  |  |  | 4     | 6.3E-1  | 9.8E-1    |
| <input type="checkbox"/> | <b>BIOCARTA</b>        | <a href="#">FAS signaling pathway ( CD95 )</a>                                                               | <a href="#">RT</a> |  |  |  |  | 4     | 6.6E-1  | 9.8E-1    |
| <input type="checkbox"/> | <b>BIOCARTA</b>        | <a href="#">HIV-I Nef</a>                                                                                    | <a href="#">RT</a> |  |  |  |  | 5     | 8.6E-1  | 1.0E0     |
| <input type="checkbox"/> | <b>KEGG_PATHWAY</b>    | <a href="#">Apoptosis</a>                                                                                    | <a href="#">RT</a> |  |  |  |  | 5     | 9.8E-1  | 1.0E0     |
|                          | Annotation Cluster 156 | Enrichment Score: 0.47                                                                                       | <b>G</b>           |  |  |  |  | Count | P_Value | Benjamini |
| <input type="checkbox"/> | <b>INTERPRO</b>        | <a href="#">ENV polyprotein (coat polyprotein)</a>                                                           | <a href="#">RT</a> |  |  |  |  | 3     | 2.1E-1  | 1.0E0     |
| <input type="checkbox"/> | <b>GOTERM_CC_ALL</b>   | <a href="#">virion part</a>                                                                                  | <a href="#">RT</a> |  |  |  |  | 4     | 3.3E-1  | 9.1E-1    |
| <input type="checkbox"/> | <b>GOTERM_CC_ALL</b>   | <a href="#">virion</a>                                                                                       | <a href="#">RT</a> |  |  |  |  | 4     | 3.3E-1  | 9.1E-1    |

| <input type="checkbox"/> |                        |                                                                                     |                        |  |          |  |  |       |         |           |
|--------------------------|------------------------|-------------------------------------------------------------------------------------|------------------------|--|----------|--|--|-------|---------|-----------|
| <input type="checkbox"/> | <b>GOTERM_CC_ALL</b>   | <a href="#">viral capsid</a>                                                        | <b>RT</b>              |  |          |  |  | 3     | 5.7E-1  | 9.9E-1    |
|                          | Annotation Cluster 157 |                                                                                     | Enrichment Score: 0.46 |  | <b>G</b> |  |  | Count | P_Value | Benjamini |
| <input type="checkbox"/> | UP_SEQ_FEATURE         | repeat:32                                                                           | <b>RT</b>              |  |          |  |  | 3     | 1.1E-1  | 1.0E0     |
| <input type="checkbox"/> | UP_SEQ_FEATURE         | repeat:29                                                                           | <b>RT</b>              |  |          |  |  | 3     | 1.4E-1  | 1.0E0     |
| <input type="checkbox"/> | UP_SEQ_FEATURE         | repeat:30                                                                           | <b>RT</b>              |  |          |  |  | 3     | 1.4E-1  | 1.0E0     |
| <input type="checkbox"/> | UP_SEQ_FEATURE         | repeat:31                                                                           | <b>RT</b>              |  |          |  |  | 3     | 1.4E-1  | 1.0E0     |
| <input type="checkbox"/> | UP_SEQ_FEATURE         | repeat:28                                                                           | <b>RT</b>              |  |          |  |  | 3     | 1.8E-1  | 1.0E0     |
| <input type="checkbox"/> | UP_SEQ_FEATURE         | repeat:23                                                                           | <b>RT</b>              |  |          |  |  | 3     | 2.2E-1  | 1.0E0     |
| <input type="checkbox"/> | UP_SEQ_FEATURE         | repeat:25                                                                           | <b>RT</b>              |  |          |  |  | 3     | 2.2E-1  | 1.0E0     |
| <input type="checkbox"/> | UP_SEQ_FEATURE         | repeat:26                                                                           | <b>RT</b>              |  |          |  |  | 3     | 2.2E-1  | 1.0E0     |
| <input type="checkbox"/> | UP_SEQ_FEATURE         | repeat:27                                                                           | <b>RT</b>              |  |          |  |  | 3     | 2.2E-1  | 1.0E0     |
| <input type="checkbox"/> | UP_SEQ_FEATURE         | repeat:22                                                                           | <b>RT</b>              |  |          |  |  | 3     | 2.6E-1  | 1.0E0     |
| <input type="checkbox"/> | UP_SEQ_FEATURE         | repeat:8                                                                            | <b>RT</b>              |  |          |  |  | 6     | 3.1E-1  | 1.0E0     |
| <input type="checkbox"/> | UP_SEQ_FEATURE         | repeat:9                                                                            | <b>RT</b>              |  |          |  |  | 5     | 3.4E-1  | 1.0E0     |
| <input type="checkbox"/> | UP_SEQ_FEATURE         | repeat:3                                                                            | <b>RT</b>              |  |          |  |  | 11    | 3.5E-1  | 1.0E0     |
| <input type="checkbox"/> | UP_SEQ_FEATURE         | repeat:20                                                                           | <b>RT</b>              |  |          |  |  | 3     | 3.7E-1  | 1.0E0     |
| <input type="checkbox"/> | UP_SEQ_FEATURE         | repeat:6                                                                            | <b>RT</b>              |  |          |  |  | 7     | 3.8E-1  | 1.0E0     |
| <input type="checkbox"/> | UP_SEQ_FEATURE         | repeat:4                                                                            | <b>RT</b>              |  |          |  |  | 9     | 3.9E-1  | 1.0E0     |
| <input type="checkbox"/> | UP_SEQ_FEATURE         | repeat:21                                                                           | <b>RT</b>              |  |          |  |  | 3     | 4.1E-1  | 1.0E0     |
| <input type="checkbox"/> | UP_SEQ_FEATURE         | repeat:17                                                                           | <b>RT</b>              |  |          |  |  | 3     | 4.4E-1  | 1.0E0     |
| <input type="checkbox"/> | UP_SEQ_FEATURE         | repeat:16                                                                           | <b>RT</b>              |  |          |  |  | 3     | 4.4E-1  | 1.0E0     |
| <input type="checkbox"/> | UP_SEQ_FEATURE         | repeat:7                                                                            | <b>RT</b>              |  |          |  |  | 6     | 4.7E-1  | 1.0E0     |
| <input type="checkbox"/> | UP_SEQ_FEATURE         | repeat:2                                                                            | <b>RT</b>              |  |          |  |  | 12    | 5.2E-1  | 1.0E0     |
| <input type="checkbox"/> | UP_SEQ_FEATURE         | repeat:11                                                                           | <b>RT</b>              |  |          |  |  | 4     | 5.3E-1  | 1.0E0     |
| <input type="checkbox"/> | UP_SEQ_FEATURE         | repeat:15                                                                           | <b>RT</b>              |  |          |  |  | 3     | 5.7E-1  | 1.0E0     |
| <input type="checkbox"/> | UP_SEQ_FEATURE         | repeat:10                                                                           | <b>RT</b>              |  |          |  |  | 4     | 5.8E-1  | 1.0E0     |
| <input type="checkbox"/> | UP_SEQ_FEATURE         | repeat:1                                                                            | <b>RT</b>              |  |          |  |  | 11    | 6.1E-1  | 1.0E0     |
| <input type="checkbox"/> | UP_SEQ_FEATURE         | repeat:14                                                                           | <b>RT</b>              |  |          |  |  | 3     | 6.5E-1  | 1.0E0     |
| <input type="checkbox"/> | UP_SEQ_FEATURE         | repeat:13                                                                           | <b>RT</b>              |  |          |  |  | 3     | 7.0E-1  | 1.0E0     |
| <input type="checkbox"/> | UP_SEQ_FEATURE         | repeat:12                                                                           | <b>RT</b>              |  |          |  |  | 3     | 7.0E-1  | 1.0E0     |
| <input type="checkbox"/> | UP_SEQ_FEATURE         | repeat:5                                                                            | <b>RT</b>              |  |          |  |  | 6     | 7.0E-1  | 1.0E0     |
|                          | Annotation Cluster 158 |                                                                                     | Enrichment Score: 0.46 |  | <b>G</b> |  |  | Count | P_Value | Benjamini |
| <input type="checkbox"/> | UP_SEQ_FEATURE         | repeat:Solcar 2                                                                     | <b>RT</b>              |  |          |  |  | 5     | 1.6E-1  | 1.0E0     |
| <input type="checkbox"/> | UP_SEQ_FEATURE         | repeat:Solcar 1                                                                     | <b>RT</b>              |  |          |  |  | 5     | 1.6E-1  | 1.0E0     |
| <input type="checkbox"/> | INTERPRO               | <a href="#">Mitochondrial brown fat uncoupling protein</a>                          | <b>RT</b>              |  |          |  |  | 3     | 2.7E-1  | 1.0E0     |
| <input type="checkbox"/> | UP_SEQ_FEATURE         | repeat:Solcar 3                                                                     | <b>RT</b>              |  |          |  |  | 4     | 3.4E-1  | 1.0E0     |
| <input type="checkbox"/> | INTERPRO               | <a href="#">Mitochondrial carrier protein</a>                                       | <b>RT</b>              |  |          |  |  | 4     | 4.1E-1  | 1.0E0     |
| <input type="checkbox"/> | INTERPRO               | <a href="#">Mitochondrial substrate carrier</a>                                     | <b>RT</b>              |  |          |  |  | 5     | 4.5E-1  | 1.0E0     |
| <input type="checkbox"/> | PIR_SUPERFAMILY        | PIRSF002458:ADP,ATP carrier protein                                                 | <b>RT</b>              |  |          |  |  | 3     | 6.4E-1  | 1.0E0     |
| <input type="checkbox"/> | INTERPRO               | <a href="#">Adenine nucleotide translocator 1</a>                                   | <b>RT</b>              |  |          |  |  | 3     | 7.1E-1  | 1.0E0     |
|                          | Annotation Cluster 159 |                                                                                     | Enrichment Score: 0.42 |  | <b>G</b> |  |  | Count | P_Value | Benjamini |
| <input type="checkbox"/> | <b>GOTERM_MF_ALL</b>   | <a href="#">iron ion transmembrane transporter activity</a>                         | <b>RT</b>              |  |          |  |  | 3     | 4.2E-2  | 6.7E-1    |
| <input type="checkbox"/> | SP_PIR_KEYWORDS        | <a href="#">Iron transport</a>                                                      | <b>RT</b>              |  |          |  |  | 5     | 1.0E-1  | 6.0E-1    |
| <input type="checkbox"/> | <b>GOTERM_MF_ALL</b>   | <a href="#">di-, tri-valent inorganic cation transmembrane transporter activity</a> | <b>RT</b>              |  |          |  |  | 6     | 1.7E-1  | 9.5E-1    |
| <input type="checkbox"/> | <b>GOTERM_MF_ALL</b>   | <a href="#">transition metal ion transmembrane transporter activity</a>             | <b>RT</b>              |  |          |  |  | 5     | 1.8E-1  | 9.6E-1    |
| <input type="checkbox"/> | <b>GOTERM_BP_ALL</b>   | <a href="#">iron ion transport</a>                                                  | <b>RT</b>              |  |          |  |  | 5     | 2.7E-1  | 9.9E-1    |
| <input type="checkbox"/> | <b>GOTERM_BP_ALL</b>   | <a href="#">transition metal ion transport</a>                                      | <b>RT</b>              |  |          |  |  | 7     | 4.4E-1  | 1.0E0     |
| <input type="checkbox"/> | <b>GOTERM_MF_ALL</b>   | <a href="#">inorganic cation transmembrane transporter activity</a>                 | <b>RT</b>              |  |          |  |  | 14    | 5.6E-1  | 1.0E0     |

| <input type="checkbox"/> | Annotation      | Gene                                                                                       | RT                 | Count | P_Value | Benjamini |
|--------------------------|-----------------|--------------------------------------------------------------------------------------------|--------------------|-------|---------|-----------|
| <input type="checkbox"/> | GOTERM_BP_ALL   | <a href="#">di-, tri-valent inorganic cation transport</a>                                 | <a href="#">RT</a> | 7     | 9.9E-1  | 1.0E0     |
| <input type="checkbox"/> | GOTERM_MF_ALL   | <a href="#">metal ion transmembrane transporter activity</a>                               | <a href="#">RT</a> | 10    | 1.0E0   | 1.0E0     |
| <input type="checkbox"/> | GOTERM_BP_ALL   | <a href="#">cation transport</a>                                                           | <a href="#">RT</a> | 22    | 1.0E0   | 1.0E0     |
| <input type="checkbox"/> | GOTERM_MF_ALL   | <a href="#">ion transmembrane transporter activity</a>                                     | <a href="#">RT</a> | 29    | 1.0E0   | 1.0E0     |
| <input type="checkbox"/> | GOTERM_BP_ALL   | <a href="#">metal ion transport</a>                                                        | <a href="#">RT</a> | 15    | 1.0E0   | 1.0E0     |
| Annotation Cluster 160   |                 | Enrichment Score: 0.4                                                                      | <b>G</b>           |       | Count   | P_Value   |
| <input type="checkbox"/> | GOTERM_CC_ALL   | <a href="#">filamentous actin</a>                                                          | <a href="#">RT</a> | 3     | 2.2E-1  | 7.9E-1    |
| <input type="checkbox"/> | GOTERM_CC_ALL   | <a href="#">cortical cytoskeleton</a>                                                      | <a href="#">RT</a> | 4     | 3.1E-1  | 8.9E-1    |
| <input type="checkbox"/> | GOTERM_CC_ALL   | <a href="#">cell cortex part</a>                                                           | <a href="#">RT</a> | 5     | 4.0E-1  | 9.5E-1    |
| <input type="checkbox"/> | GOTERM_CC_ALL   | <a href="#">cell cortex</a>                                                                | <a href="#">RT</a> | 6     | 5.3E-1  | 9.8E-1    |
| <input type="checkbox"/> | GOTERM_CC_ALL   | <a href="#">actin filament</a>                                                             | <a href="#">RT</a> | 3     | 7.1E-1  | 1.0E0     |
| Annotation Cluster 161   |                 | Enrichment Score: 0.4                                                                      | <b>G</b>           |       | Count   | P_Value   |
| <input type="checkbox"/> | BIOCARTA        | <a href="#">How Progesterone Initiates the Oocyte Maturation</a>                           | <a href="#">RT</a> | 9     | 2.0E-3  | 1.1E-1    |
| <input type="checkbox"/> | BIOCARTA        | <a href="#">METS affect on Macrophage Differentiation</a>                                  | <a href="#">RT</a> | 7     | 1.6E-2  | 3.7E-1    |
| <input type="checkbox"/> | BIOCARTA        | <a href="#">Signaling Pathway from G-Protein Families</a>                                  | <a href="#">RT</a> | 8     | 2.2E-2  | 4.1E-1    |
| <input type="checkbox"/> | BIOCARTA        | <a href="#">Cadmium induces DNA synthesis and proliferation in macrophages</a>             | <a href="#">RT</a> | 6     | 2.4E-2  | 4.1E-1    |
| <input type="checkbox"/> | BIOCARTA        | <a href="#">Influence of Ras and Rho proteins on G1 to S Transition</a>                    | <a href="#">RT</a> | 8     | 2.7E-2  | 4.0E-1    |
| <input type="checkbox"/> | KEGG_PATHWAY    | <a href="#">Bladder cancer</a>                                                             | <a href="#">RT</a> | 10    | 3.3E-2  | 3.5E-1    |
| <input type="checkbox"/> | KEGG_PATHWAY    | <a href="#">Gap junction</a>                                                               | <a href="#">RT</a> | 14    | 8.2E-2  | 5.5E-1    |
| <input type="checkbox"/> | BIOCARTA        | <a href="#">Transcription factor CREB and its extracellular signals</a>                    | <a href="#">RT</a> | 6     | 9.7E-2  | 7.5E-1    |
| <input type="checkbox"/> | BIOCARTA        | <a href="#">Corticosteroids and cardioprotection</a>                                       | <a href="#">RT</a> | 5     | 1.1E-1  | 7.6E-1    |
| <input type="checkbox"/> | BIOCARTA        | <a href="#">CCR3 signaling in Eosinophils</a>                                              | <a href="#">RT</a> | 6     | 1.1E-1  | 7.4E-1    |
| <input type="checkbox"/> | SP_PIR_KEYWORDS | <a href="#">nucleotide binding</a>                                                         | <a href="#">RT</a> | 12    | 1.3E-1  | 6.9E-1    |
| <input type="checkbox"/> | SP_PIR_KEYWORDS | <a href="#">P-loop</a>                                                                     | <a href="#">RT</a> | 12    | 1.4E-1  | 7.0E-1    |
| <input type="checkbox"/> | BIOCARTA        | <a href="#">Role of EGF Receptor Transactivation by GPCRs in Cardiac Hypertrophy</a>       | <a href="#">RT</a> | 5     | 1.7E-1  | 8.1E-1    |
| <input type="checkbox"/> | BIOCARTA        | <a href="#">Trka Receptor Signaling Pathway</a>                                            | <a href="#">RT</a> | 4     | 1.9E-1  | 8.2E-1    |
| <input type="checkbox"/> | SP_PIR_KEYWORDS | <a href="#">GTP binding</a>                                                                | <a href="#">RT</a> | 7     | 2.0E-1  | 8.1E-1    |
| <input type="checkbox"/> | SP_PIR_KEYWORDS | <a href="#">thiolester bond</a>                                                            | <a href="#">RT</a> | 4     | 2.0E-1  | 8.1E-1    |
| <input type="checkbox"/> | BIOCARTA        | <a href="#">Attenuation of GPCR Signaling</a>                                              | <a href="#">RT</a> | 3     | 2.2E-1  | 8.5E-1    |
| <input type="checkbox"/> | KEGG_PATHWAY    | <a href="#">Small cell lung cancer</a>                                                     | <a href="#">RT</a> | 13    | 2.2E-1  | 8.1E-1    |
| <input type="checkbox"/> | BIOCARTA        | <a href="#">Inhibition of Cellular Proliferation by Gleevec</a>                            | <a href="#">RT</a> | 5     | 2.4E-1  | 8.8E-1    |
| <input type="checkbox"/> | BIOCARTA        | <a href="#">Pertussis toxin-insensitive CCR5 Signaling in Macrophage</a>                   | <a href="#">RT</a> | 4     | 2.5E-1  | 8.8E-1    |
| <input type="checkbox"/> | KEGG_PATHWAY    | <a href="#">Glioma</a>                                                                     | <a href="#">RT</a> | 9     | 2.7E-1  | 8.5E-1    |
| <input type="checkbox"/> | KEGG_PATHWAY    | <a href="#">Pancreatic cancer</a>                                                          | <a href="#">RT</a> | 10    | 3.2E-1  | 8.9E-1    |
| <input type="checkbox"/> | KEGG_PATHWAY    | <a href="#">Non-small cell lung cancer</a>                                                 | <a href="#">RT</a> | 8     | 3.2E-1  | 8.9E-1    |
| <input type="checkbox"/> | BIOCARTA        | <a href="#">The IGF-1 Receptor and Longevity</a>                                           | <a href="#">RT</a> | 3     | 3.8E-1  | 9.4E-1    |
| <input type="checkbox"/> | BIOCARTA        | <a href="#">IL-2 Receptor Beta Chain in T cell Activation</a>                              | <a href="#">RT</a> | 6     | 4.3E-1  | 9.5E-1    |
| <input type="checkbox"/> | INTERPRO        | <a href="#">Guanine nucleotide binding protein (G-protein), alpha subunit</a>              | <a href="#">RT</a> | 3     | 4.3E-1  | 1.0E0     |
| <input type="checkbox"/> | BIOCARTA        | <a href="#">Roles of ?-arrestin-dependent Recruitment of Src Kinases in GPCR Signaling</a> | <a href="#">RT</a> | 4     | 4.4E-1  | 9.5E-1    |
| <input type="checkbox"/> | BIOCARTA        | <a href="#">BCR Signaling Pathway</a>                                                      | <a href="#">RT</a> | 5     | 4.5E-1  | 9.5E-1    |
| <input type="checkbox"/> | KEGG_PATHWAY    | <a href="#">Prostate cancer</a>                                                            | <a href="#">RT</a> | 11    | 4.5E-1  | 9.4E-1    |
| <input type="checkbox"/> | BIOCARTA        | <a href="#">Ras Signaling Pathway</a>                                                      | <a href="#">RT</a> | 4     | 4.7E-1  | 9.6E-1    |
| <input type="checkbox"/> | KEGG_PATHWAY    | <a href="#">Chronic myeloid leukemia</a>                                                   | <a href="#">RT</a> | 9     | 5.1E-1  | 9.6E-1    |
| <input type="checkbox"/> | BIOCARTA        | <a href="#">NFAT and Hypertrophy of the heart (Transcription in the broken heart)</a>      | <a href="#">RT</a> | 6     | 5.2E-1  | 9.7E-1    |
| <input type="checkbox"/> | BIOCARTA        | <a href="#">Erk1/Erk2 Mapk Signaling pathway</a>                                           | <a href="#">RT</a> | 5     | 5.2E-1  | 9.6E-1    |

|                          |                 |                                                                                                   |                    |  |    |        |        |
|--------------------------|-----------------|---------------------------------------------------------------------------------------------------|--------------------|--|----|--------|--------|
| <input type="checkbox"/> | BIOCARTA        | <a href="#">Fc Epsilon Receptor 1 Signaling in Mast Cells</a>                                     | <a href="#">RT</a> |  | 5  | 5.2E-1 | 9.6E-1 |
| <input type="checkbox"/> | BIOCARTA        | <a href="#">p38 MAPK Signaling Pathway</a>                                                        | <a href="#">RT</a> |  | 5  | 5.2E-1 | 9.6E-1 |
| <input type="checkbox"/> | BIOCARTA        | <a href="#">Treffol Factors Initiate Mucosal Healing</a>                                          | <a href="#">RT</a> |  | 4  | 5.3E-1 | 9.6E-1 |
| <input type="checkbox"/> | BIOCARTA        | <a href="#">TPO Signaling Pathway</a>                                                             | <a href="#">RT</a> |  | 4  | 5.3E-1 | 9.6E-1 |
| <input type="checkbox"/> | BIOCARTA        | <a href="#">Role of Erk5 in Neuronal Survival</a>                                                 | <a href="#">RT</a> |  | 3  | 5.4E-1 | 9.6E-1 |
| <input type="checkbox"/> | BIOCARTA        | <a href="#">CXCR4 Signaling Pathway</a>                                                           | <a href="#">RT</a> |  | 4  | 5.8E-1 | 9.8E-1 |
| <input type="checkbox"/> | BIOCARTA        | <a href="#">Bioactive Peptide Induced Signaling Pathway</a>                                       | <a href="#">RT</a> |  | 5  | 5.9E-1 | 9.8E-1 |
| <input type="checkbox"/> | BIOCARTA        | <a href="#">IL 3 signaling pathway</a>                                                            | <a href="#">RT</a> |  | 3  | 6.3E-1 | 9.8E-1 |
| <input type="checkbox"/> | BIOCARTA        | <a href="#">EGF Signaling Pathway</a>                                                             | <a href="#">RT</a> |  | 4  | 6.6E-1 | 9.8E-1 |
| <input type="checkbox"/> | BIOCARTA        | <a href="#">PDGF Signaling Pathway</a>                                                            | <a href="#">RT</a> |  | 4  | 6.6E-1 | 9.8E-1 |
| <input type="checkbox"/> | BIOCARTA        | <a href="#">Links between Pyk2 and Map Kinases</a>                                                | <a href="#">RT</a> |  | 4  | 6.6E-1 | 9.8E-1 |
| <input type="checkbox"/> | BIOCARTA        | <a href="#">Regulation of transcriptional activity by PML</a>                                     | <a href="#">RT</a> |  | 3  | 6.6E-1 | 9.8E-1 |
| <input type="checkbox"/> | BIOCARTA        | <a href="#">Nerve growth factor pathway (NGF)</a>                                                 | <a href="#">RT</a> |  | 3  | 6.6E-1 | 9.8E-1 |
| <input type="checkbox"/> | BIOCARTA        | <a href="#">T Cell Receptor Signaling Pathway</a>                                                 | <a href="#">RT</a> |  | 5  | 6.7E-1 | 9.8E-1 |
| <input type="checkbox"/> | BIOCARTA        | <a href="#">Multiple antiapoptotic pathways from IGF-1R signaling lead to BAD phosphorylation</a> | <a href="#">RT</a> |  | 3  | 6.9E-1 | 9.8E-1 |
| <input type="checkbox"/> | SP_PIR_KEYWORDS | <a href="#">proto-oncogene</a>                                                                    | <a href="#">RT</a> |  | 8  | 6.9E-1 | 1.0E0  |
| <input type="checkbox"/> | BIOCARTA        | <a href="#">Angiotensin II mediated activation of JNK Pathway via Pyk2 dependent signaling</a>    | <a href="#">RT</a> |  | 4  | 7.0E-1 | 9.8E-1 |
| <input type="checkbox"/> | BIOCARTA        | <a href="#">IGF-1 Signaling Pathway</a>                                                           | <a href="#">RT</a> |  | 3  | 7.1E-1 | 9.9E-1 |
| <input type="checkbox"/> | BIOCARTA        | <a href="#">Role of MAL in Rho-Mediated Activation of SRF</a>                                     | <a href="#">RT</a> |  | 3  | 7.1E-1 | 9.9E-1 |
| <input type="checkbox"/> | BIOCARTA        | <a href="#">EPO Signaling Pathway</a>                                                             | <a href="#">RT</a> |  | 3  | 7.4E-1 | 9.9E-1 |
| <input type="checkbox"/> | KEGG_PATHWAY    | <a href="#">Melanoma</a>                                                                          | <a href="#">RT</a> |  | 7  | 7.4E-1 | 9.9E-1 |
| <input type="checkbox"/> | BIOCARTA        | <a href="#">IL 6 signaling pathway</a>                                                            | <a href="#">RT</a> |  | 3  | 7.6E-1 | 9.9E-1 |
| <input type="checkbox"/> | KEGG_PATHWAY    | <a href="#">Renal cell carcinoma</a>                                                              | <a href="#">RT</a> |  | 7  | 7.7E-1 | 1.0E0  |
| <input type="checkbox"/> | BIOCARTA        | <a href="#">Insulin Signaling Pathway</a>                                                         | <a href="#">RT</a> |  | 3  | 7.8E-1 | 9.9E-1 |
| <input type="checkbox"/> | KEGG_PATHWAY    | <a href="#">VEGF signaling pathway</a>                                                            | <a href="#">RT</a> |  | 7  | 8.0E-1 | 1.0E0  |
| <input type="checkbox"/> | BIOCARTA        | <a href="#">IL 2 signaling pathway</a>                                                            | <a href="#">RT</a> |  | 3  | 8.0E-1 | 9.9E-1 |
| <input type="checkbox"/> | KEGG_PATHWAY    | <a href="#">Thyroid cancer</a>                                                                    | <a href="#">RT</a> |  | 3  | 8.1E-1 | 1.0E0  |
| <input type="checkbox"/> | KEGG_PATHWAY    | <a href="#">GnRH signaling pathway</a>                                                            | <a href="#">RT</a> |  | 8  | 8.2E-1 | 1.0E0  |
| <input type="checkbox"/> | KEGG_PATHWAY    | <a href="#">B cell receptor signaling pathway</a>                                                 | <a href="#">RT</a> |  | 6  | 8.3E-1 | 1.0E0  |
| <input type="checkbox"/> | BIOCARTA        | <a href="#">Growth Hormone Signaling Pathway</a>                                                  | <a href="#">RT</a> |  | 3  | 8.6E-1 | 1.0E0  |
| <input type="checkbox"/> | BIOCARTA        | <a href="#">Keratinocyte Differentiation</a>                                                      | <a href="#">RT</a> |  | 4  | 8.7E-1 | 1.0E0  |
| <input type="checkbox"/> | KEGG_PATHWAY    | <a href="#">T cell receptor signaling pathway</a>                                                 | <a href="#">RT</a> |  | 8  | 8.8E-1 | 1.0E0  |
| <input type="checkbox"/> | BIOCARTA        | <a href="#">fMLP induced chemokine gene expression in HMC-1 cells</a>                             | <a href="#">RT</a> |  | 3  | 8.8E-1 | 1.0E0  |
| <input type="checkbox"/> | KEGG_PATHWAY    | <a href="#">Fc epsilon RI signaling pathway</a>                                                   | <a href="#">RT</a> |  | 6  | 8.8E-1 | 1.0E0  |
| <input type="checkbox"/> | KEGG_PATHWAY    | <a href="#">Long-term depression</a>                                                              | <a href="#">RT</a> |  | 6  | 8.9E-1 | 1.0E0  |
| <input type="checkbox"/> | KEGG_PATHWAY    | <a href="#">Endometrial cancer</a>                                                                | <a href="#">RT</a> |  | 4  | 9.1E-1 | 1.0E0  |
| <input type="checkbox"/> | KEGG_PATHWAY    | <a href="#">Long-term potentiation</a>                                                            | <a href="#">RT</a> |  | 5  | 9.2E-1 | 1.0E0  |
| <input type="checkbox"/> | KEGG_PATHWAY    | <a href="#">mTOR signaling pathway</a>                                                            | <a href="#">RT</a> |  | 4  | 9.2E-1 | 1.0E0  |
| <input type="checkbox"/> | KEGG_PATHWAY    | <a href="#">Melanogenesis</a>                                                                     | <a href="#">RT</a> |  | 7  | 9.4E-1 | 1.0E0  |
| <input type="checkbox"/> | KEGG_PATHWAY    | <a href="#">Tight junction</a>                                                                    | <a href="#">RT</a> |  | 9  | 9.4E-1 | 1.0E0  |
| <input type="checkbox"/> | KEGG_PATHWAY    | <a href="#">Acute myeloid leukemia</a>                                                            | <a href="#">RT</a> |  | 4  | 9.5E-1 | 1.0E0  |
| <input type="checkbox"/> | KEGG_PATHWAY    | <a href="#">ErbB signaling pathway</a>                                                            | <a href="#">RT</a> |  | 5  | 9.8E-1 | 1.0E0  |
| <input type="checkbox"/> | KEGG_PATHWAY    | <a href="#">Axon guidance</a>                                                                     | <a href="#">RT</a> |  | 7  | 9.9E-1 | 1.0E0  |
| <input type="checkbox"/> | KEGG_PATHWAY    | <a href="#">Focal adhesion</a>                                                                    | <a href="#">RT</a> |  | 12 | 9.9E-1 | 1.0E0  |
| <input type="checkbox"/> | KEGG_PATHWAY    | <a href="#">MAPK signaling pathway</a>                                                            | <a href="#">RT</a> |  | 16 | 1.0E0  | 1.0E0  |
| <input type="checkbox"/> | SP_PIR_KEYWORDS | <a href="#">Palmitate</a>                                                                         | <a href="#">RT</a> |  | 9  | 1.0E0  | 1.0E0  |

| <input type="checkbox"/> | Source                 | Pathway                                                                    | RT                 |  | Count | P_Value | Benjamini |
|--------------------------|------------------------|----------------------------------------------------------------------------|--------------------|--|-------|---------|-----------|
| <input type="checkbox"/> | BIOCARTA               | <a href="#">MAPKinase Signaling Pathway</a>                                | <a href="#">RT</a> |  | 4     | 1.0E0   | 1.0E0     |
| <input type="checkbox"/> | KEGG_PATHWAY           | <a href="#">Natural killer cell mediated cytotoxicity</a>                  | <a href="#">RT</a> |  | 5     | 1.0E0   | 1.0E0     |
| <input type="checkbox"/> | KEGG_PATHWAY           | <a href="#">Regulation of actin cytoskeleton</a>                           | <a href="#">RT</a> |  | 8     | 1.0E0   | 1.0E0     |
|                          | Annotation Cluster 162 | Enrichment Score: 0.37                                                     | <b>G</b>           |  | Count | P_Value | Benjamini |
| <input type="checkbox"/> | GOTERM_BP_ALL          | <a href="#">release of cytochrome c from mitochondria</a>                  | <a href="#">RT</a> |  | 3     | 3.4E-1  | 1.0E0     |
| <input type="checkbox"/> | GOTERM_BP_ALL          | <a href="#">apoptotic mitochondrial changes</a>                            | <a href="#">RT</a> |  | 4     | 3.5E-1  | 1.0E0     |
| <input type="checkbox"/> | GOTERM_BP_ALL          | <a href="#">apoptotic program</a>                                          | <a href="#">RT</a> |  | 6     | 6.5E-1  | 1.0E0     |
|                          | Annotation Cluster 163 | Enrichment Score: 0.36                                                     | <b>G</b>           |  | Count | P_Value | Benjamini |
| <input type="checkbox"/> | GOTERM_MF_ALL          | <a href="#">tumor necrosis factor receptor superfamily binding</a>         | <a href="#">RT</a> |  | 4     | 2.9E-1  | 9.9E-1    |
| <input type="checkbox"/> | GOTERM_MF_ALL          | <a href="#">tumor necrosis factor receptor binding</a>                     | <a href="#">RT</a> |  | 4     | 2.9E-1  | 9.9E-1    |
| <input type="checkbox"/> | GOTERM_MF_ALL          | <a href="#">cytokine activity</a>                                          | <a href="#">RT</a> |  | 12    | 9.9E-1  | 1.0E0     |
|                          | Annotation Cluster 164 | Enrichment Score: 0.34                                                     | <b>G</b>           |  | Count | P_Value | Benjamini |
| <input type="checkbox"/> | GOTERM_BP_ALL          | <a href="#">pigment biosynthetic process</a>                               | <a href="#">RT</a> |  | 5     | 3.1E-1  | 9.9E-1    |
| <input type="checkbox"/> | GOTERM_BP_ALL          | <a href="#">pigment metabolic process</a>                                  | <a href="#">RT</a> |  | 5     | 4.4E-1  | 1.0E0     |
| <input type="checkbox"/> | GOTERM_BP_ALL          | <a href="#">secondary metabolic process</a>                                | <a href="#">RT</a> |  | 5     | 7.1E-1  | 1.0E0     |
|                          | Annotation Cluster 165 | Enrichment Score: 0.33                                                     | <b>G</b>           |  | Count | P_Value | Benjamini |
| <input type="checkbox"/> | INTERPRO               | <a href="#">Porin, eukaryotic type</a>                                     | <a href="#">RT</a> |  | 3     | 6.2E-2  | 9.8E-1    |
| <input type="checkbox"/> | GOTERM_CC_ALL          | <a href="#">organelle outer membrane</a>                                   | <a href="#">RT</a> |  | 6     | 1.5E-1  | 6.6E-1    |
| <input type="checkbox"/> | GOTERM_CC_ALL          | <a href="#">mitochondrial outer membrane</a>                               | <a href="#">RT</a> |  | 5     | 2.5E-1  | 8.3E-1    |
| <input type="checkbox"/> | GOTERM_MF_ALL          | <a href="#">anion channel activity</a>                                     | <a href="#">RT</a> |  | 3     | 9.7E-1  | 1.0E0     |
| <input type="checkbox"/> | GOTERM_MF_ALL          | <a href="#">anion transmembrane transporter activity</a>                   | <a href="#">RT</a> |  | 6     | 9.8E-1  | 1.0E0     |
| <input type="checkbox"/> | GOTERM_BP_ALL          | <a href="#">anion transport</a>                                            | <a href="#">RT</a> |  | 9     | 1.0E0   | 1.0E0     |
| <input type="checkbox"/> | GOTERM_MF_ALL          | <a href="#">ion channel activity</a>                                       | <a href="#">RT</a> |  | 5     | 1.0E0   | 1.0E0     |
| <input type="checkbox"/> | GOTERM_MF_ALL          | <a href="#">substrate specific channel activity</a>                        | <a href="#">RT</a> |  | 5     | 1.0E0   | 1.0E0     |
|                          | Annotation Cluster 166 | Enrichment Score: 0.33                                                     | <b>G</b>           |  | Count | P_Value | Benjamini |
| <input type="checkbox"/> | GOTERM_BP_ALL          | <a href="#">amyloid precursor protein metabolic process</a>                | <a href="#">RT</a> |  | 3     | 3.0E-1  | 9.9E-1    |
| <input type="checkbox"/> | GOTERM_BP_ALL          | <a href="#">beta-amyloid metabolic process</a>                             | <a href="#">RT</a> |  | 3     | 3.7E-1  | 1.0E0     |
| <input type="checkbox"/> | GOTERM_BP_ALL          | <a href="#">glycoprotein metabolic process</a>                             | <a href="#">RT</a> |  | 8     | 9.2E-1  | 1.0E0     |
|                          | Annotation Cluster 167 | Enrichment Score: 0.32                                                     | <b>G</b>           |  | Count | P_Value | Benjamini |
| <input type="checkbox"/> | INTERPRO               | <a href="#">Myb, DNA-binding</a>                                           | <a href="#">RT</a> |  | 5     | 3.1E-1  | 1.0E0     |
| <input type="checkbox"/> | SMART                  | <a href="#">SANT</a>                                                       | <a href="#">RT</a> |  | 6     | 3.1E-1  | 1.0E0     |
| <input type="checkbox"/> | INTERPRO               | <a href="#">SANT, DNA-binding</a>                                          | <a href="#">RT</a> |  | 6     | 5.3E-1  | 1.0E0     |
| <input type="checkbox"/> | INTERPRO               | <a href="#">Homeodomain-related</a>                                        | <a href="#">RT</a> |  | 5     | 1.0E0   | 1.0E0     |
|                          | Annotation Cluster 168 | Enrichment Score: 0.31                                                     | <b>G</b>           |  | Count | P_Value | Benjamini |
| <input type="checkbox"/> | SMART                  | <a href="#">HMG</a>                                                        | <a href="#">RT</a> |  | 6     | 3.1E-1  | 1.0E0     |
| <input type="checkbox"/> | INTERPRO               | <a href="#">High mobility group box, HMG1/HMG2, subgroup</a>               | <a href="#">RT</a> |  | 3     | 4.6E-1  | 1.0E0     |
| <input type="checkbox"/> | INTERPRO               | <a href="#">High mobility group box, HMG1/HMG2</a>                         | <a href="#">RT</a> |  | 6     | 4.8E-1  | 1.0E0     |
| <input type="checkbox"/> | INTERPRO               | <a href="#">High mobility group box, HMG</a>                               | <a href="#">RT</a> |  | 4     | 7.9E-1  | 1.0E0     |
|                          | Annotation Cluster 169 | Enrichment Score: 0.31                                                     | <b>G</b>           |  | Count | P_Value | Benjamini |
| <input type="checkbox"/> | GOTERM_BP_ALL          | <a href="#">cellular macromolecule catabolic process</a>                   | <a href="#">RT</a> |  | 31    | 1.3E-1  | 9.1E-1    |
| <input type="checkbox"/> | GOTERM_BP_ALL          | <a href="#">biopolymer catabolic process</a>                               | <a href="#">RT</a> |  | 29    | 2.7E-1  | 9.9E-1    |
| <input type="checkbox"/> | GOTERM_BP_ALL          | <a href="#">cellular catabolic process</a>                                 | <a href="#">RT</a> |  | 47    | 3.1E-1  | 9.9E-1    |
| <input type="checkbox"/> | GOTERM_BP_ALL          | <a href="#">ubiquitin-dependent protein catabolic process</a>              | <a href="#">RT</a> |  | 16    | 3.2E-1  | 9.9E-1    |
| <input type="checkbox"/> | GOTERM_BP_ALL          | <a href="#">modification-dependent macromolecule catabolic process</a>     | <a href="#">RT</a> |  | 16    | 3.5E-1  | 1.0E0     |
| <input type="checkbox"/> | GOTERM_BP_ALL          | <a href="#">modification-dependent protein catabolic process</a>           | <a href="#">RT</a> |  | 16    | 3.5E-1  | 1.0E0     |
| <input type="checkbox"/> | GOTERM_BP_ALL          | <a href="#">proteolysis involved in cellular protein catabolic process</a> | <a href="#">RT</a> |  | 16    | 3.8E-1  | 1.0E0     |
| <input type="checkbox"/> | GOTERM_BP_ALL          | <a href="#">macromolecule catabolic process</a>                            | <a href="#">RT</a> |  | 34    | 3.9E-1  | 1.0E0     |
| <input type="checkbox"/> | GOTERM_BP_ALL          | <a href="#">cellular protein catabolic process</a>                         | <a href="#">RT</a> |  | 16    | 4.0E-1  | 1.0E0     |



|                          |                 |                                                                                     |                    |  |       |         |           |
|--------------------------|-----------------|-------------------------------------------------------------------------------------|--------------------|--|-------|---------|-----------|
| <input type="checkbox"/> | GOTERM_MF_ALL   | <a href="#">ubiquitin thiolesterase activity</a>                                    | <a href="#">RT</a> |  | 6     | 6.3E-1  | 1.0E0     |
| <input type="checkbox"/> | GOTERM_MF_ALL   | <a href="#">thiolester hydrolase activity</a>                                       | <a href="#">RT</a> |  | 8     | 6.3E-1  | 1.0E0     |
| <input type="checkbox"/> | GOTERM_MF_ALL   | <a href="#">ubiquitin-specific protease activity</a>                                | <a href="#">RT</a> |  | 6     | 6.6E-1  | 1.0E0     |
| <input type="checkbox"/> | GOTERM_MF_ALL   | <a href="#">small conjugating protein-specific protease activity</a>                | <a href="#">RT</a> |  | 6     | 6.8E-1  | 1.0E0     |
| <input type="checkbox"/> | GOTERM_BP_ALL   | <a href="#">protein catabolic process</a>                                           | <a href="#">RT</a> |  | 18    | 7.0E-1  | 1.0E0     |
| <input type="checkbox"/> | INTERPRO        | <a href="#">Peptidase C19, ubiquitin carboxyl-terminal hydrolase 2</a>              | <a href="#">RT</a> |  | 4     | 7.5E-1  | 1.0E0     |
| <input type="checkbox"/> | SP_PIR_KEYWORDS | <a href="#">thiol protease</a>                                                      | <a href="#">RT</a> |  | 9     | 7.7E-1  | 1.0E0     |
| <input type="checkbox"/> | GOTERM_BP_ALL   | <a href="#">catabolic process</a>                                                   | <a href="#">RT</a> |  | 50    | 8.1E-1  | 1.0E0     |
| <input type="checkbox"/> | GOTERM_MF_ALL   | <a href="#">cysteine-type peptidase activity</a>                                    | <a href="#">RT</a> |  | 11    | 9.3E-1  | 1.0E0     |
| <input type="checkbox"/> | GOTERM_BP_ALL   | <a href="#">proteolysis</a>                                                         | <a href="#">RT</a> |  | 46    | 1.0E0   | 1.0E0     |
| Annotation Cluster 170   |                 | Enrichment Score: 0.31                                                              | <b>G</b>           |  | Count | P_Value | Benjamini |
| <input type="checkbox"/> | GOTERM_CC_ALL   | <a href="#">endoplasmic reticulum part</a>                                          | <a href="#">RT</a> |  | 14    | 2.3E-1  | 8.0E-1    |
| <input type="checkbox"/> | SP_PIR_KEYWORDS | <a href="#">GPI-anchor biosynthesis</a>                                             | <a href="#">RT</a> |  | 3     | 2.7E-1  | 9.0E-1    |
| <input type="checkbox"/> | GOTERM_BP_ALL   | <a href="#">phospholipid biosynthetic process</a>                                   | <a href="#">RT</a> |  | 9     | 2.7E-1  | 9.9E-1    |
| <input type="checkbox"/> | KEGG_PATHWAY    | <a href="#">Glycosylphosphatidylinositol(GPI)-anchor biosynthesis</a>               | <a href="#">RT</a> |  | 4     | 3.3E-1  | 8.9E-1    |
| <input type="checkbox"/> | GOTERM_CC_ALL   | <a href="#">nuclear envelope-endoplasmic reticulum network</a>                      | <a href="#">RT</a> |  | 12    | 3.5E-1  | 9.2E-1    |
| <input type="checkbox"/> | GOTERM_BP_ALL   | <a href="#">GPI anchor biosynthetic process</a>                                     | <a href="#">RT</a> |  | 4     | 3.5E-1  | 1.0E0     |
| <input type="checkbox"/> | GOTERM_BP_ALL   | <a href="#">GPI anchor metabolic process</a>                                        | <a href="#">RT</a> |  | 4     | 3.8E-1  | 1.0E0     |
| <input type="checkbox"/> | GOTERM_BP_ALL   | <a href="#">phosphoinositide biosynthetic process</a>                               | <a href="#">RT</a> |  | 4     | 4.0E-1  | 1.0E0     |
| <input type="checkbox"/> | SP_PIR_KEYWORDS | <a href="#">Phospholipid biosynthesis</a>                                           | <a href="#">RT</a> |  | 4     | 4.3E-1  | 9.8E-1    |
| <input type="checkbox"/> | GOTERM_CC_ALL   | <a href="#">endoplasmic reticulum membrane</a>                                      | <a href="#">RT</a> |  | 11    | 4.3E-1  | 9.6E-1    |
| <input type="checkbox"/> | GOTERM_BP_ALL   | <a href="#">membrane lipid biosynthetic process</a>                                 | <a href="#">RT</a> |  | 9     | 4.8E-1  | 1.0E0     |
| <input type="checkbox"/> | GOTERM_BP_ALL   | <a href="#">protein amino acid lipidation</a>                                       | <a href="#">RT</a> |  | 6     | 5.0E-1  | 1.0E0     |
| <input type="checkbox"/> | GOTERM_BP_ALL   | <a href="#">lipoprotein biosynthetic process</a>                                    | <a href="#">RT</a> |  | 6     | 5.6E-1  | 1.0E0     |
| <input type="checkbox"/> | GOTERM_BP_ALL   | <a href="#">glycerophospholipid biosynthetic process</a>                            | <a href="#">RT</a> |  | 4     | 6.3E-1  | 1.0E0     |
| <input type="checkbox"/> | GOTERM_BP_ALL   | <a href="#">lipoprotein metabolic process</a>                                       | <a href="#">RT</a> |  | 7     | 6.7E-1  | 1.0E0     |
| <input type="checkbox"/> | GOTERM_BP_ALL   | <a href="#">phosphoinositide metabolic process</a>                                  | <a href="#">RT</a> |  | 4     | 8.7E-1  | 1.0E0     |
| <input type="checkbox"/> | GOTERM_BP_ALL   | <a href="#">phospholipid metabolic process</a>                                      | <a href="#">RT</a> |  | 10    | 8.8E-1  | 1.0E0     |
| <input type="checkbox"/> | KEGG_PATHWAY    | <a href="#">Glycan structures - biosynthesis 2</a>                                  | <a href="#">RT</a> |  | 4     | 9.3E-1  | 1.0E0     |
| <input type="checkbox"/> | GOTERM_BP_ALL   | <a href="#">glycerophospholipid metabolic process</a>                               | <a href="#">RT</a> |  | 4     | 9.6E-1  | 1.0E0     |
| <input type="checkbox"/> | GOTERM_BP_ALL   | <a href="#">membrane lipid metabolic process</a>                                    | <a href="#">RT</a> |  | 11    | 9.7E-1  | 1.0E0     |
| Annotation Cluster 171   |                 | Enrichment Score: 0.31                                                              | <b>G</b>           |  | Count | P_Value | Benjamini |
| <input type="checkbox"/> | GOTERM_MF_ALL   | <a href="#">dolichyl-diphosphooligosaccharide-protein glycotransferase activity</a> | <a href="#">RT</a> |  | 3     | 1.5E-1  | 9.4E-1    |
| <input type="checkbox"/> | GOTERM_MF_ALL   | <a href="#">oligosaccharyl transferase activity</a>                                 | <a href="#">RT</a> |  | 3     | 1.5E-1  | 9.4E-1    |
| <input type="checkbox"/> | GOTERM_BP_ALL   | <a href="#">protein amino acid N-linked glycosylation via asparagine</a>            | <a href="#">RT</a> |  | 3     | 2.3E-1  | 9.8E-1    |
| <input type="checkbox"/> | GOTERM_BP_ALL   | <a href="#">peptidyl-asparagine modification</a>                                    | <a href="#">RT</a> |  | 3     | 2.3E-1  | 9.8E-1    |
| <input type="checkbox"/> | KEGG_PATHWAY    | <a href="#">N-Glycan biosynthesis</a>                                               | <a href="#">RT</a> |  | 6     | 3.8E-1  | 9.1E-1    |
| <input type="checkbox"/> | GOTERM_BP_ALL   | <a href="#">protein amino acid N-linked glycosylation</a>                           | <a href="#">RT</a> |  | 3     | 6.6E-1  | 1.0E0     |
| <input type="checkbox"/> | GOTERM_BP_ALL   | <a href="#">glycoprotein biosynthetic process</a>                                   | <a href="#">RT</a> |  | 7     | 8.8E-1  | 1.0E0     |
| <input type="checkbox"/> | GOTERM_BP_ALL   | <a href="#">biopolymer glycosylation</a>                                            | <a href="#">RT</a> |  | 6     | 9.1E-1  | 1.0E0     |
| <input type="checkbox"/> | GOTERM_BP_ALL   | <a href="#">glycoprotein metabolic process</a>                                      | <a href="#">RT</a> |  | 8     | 9.2E-1  | 1.0E0     |
| <input type="checkbox"/> | GOTERM_BP_ALL   | <a href="#">protein amino acid glycosylation</a>                                    | <a href="#">RT</a> |  | 5     | 9.6E-1  | 1.0E0     |
| <input type="checkbox"/> | KEGG_PATHWAY    | <a href="#">Glycan structures - biosynthesis 1</a>                                  | <a href="#">RT</a> |  | 7     | 9.7E-1  | 1.0E0     |
| <input type="checkbox"/> | GOTERM_MF_ALL   | <a href="#">transferase activity, transferring hexosyl groups</a>                   | <a href="#">RT</a> |  | 8     | 9.9E-1  | 1.0E0     |
| Annotation Cluster 172   |                 | Enrichment Score: 0.3                                                               | <b>G</b>           |  | Count | P_Value | Benjamini |
| <input type="checkbox"/> | GOTERM_BP_ALL   | <a href="#">regulation of nucleocytoplasmic transport</a>                           | <a href="#">RT</a> |  | 4     | 2.7E-1  | 9.9E-1    |
| <input type="checkbox"/> | GOTERM_BP_ALL   | <a href="#">regulation of protein transport</a>                                     | <a href="#">RT</a> |  | 3     | 5.0E-1  | 1.0E0     |

| <input type="checkbox"/> | Annotation Cluster     | Enrichment Score                                                                            | RT                     |          | Count | P_Value | Benjamini |
|--------------------------|------------------------|---------------------------------------------------------------------------------------------|------------------------|----------|-------|---------|-----------|
| <input type="checkbox"/> | GOTERM_BP_ALL          | <a href="#">regulation of transport</a>                                                     | RT                     |          | 7     | 9.4E-1  | 1.0E0     |
|                          | Annotation Cluster 173 |                                                                                             | Enrichment Score: 0.29 | <b>G</b> |       |         |           |
| <input type="checkbox"/> | GOTERM_BP_ALL          | <a href="#">tricarboxylic acid cycle</a>                                                    | RT                     |          | 4     | 4.0E-1  | 1.0E0     |
| <input type="checkbox"/> | GOTERM_BP_ALL          | <a href="#">acetyl-CoA metabolic process</a>                                                | RT                     |          | 5     | 4.2E-1  | 1.0E0     |
| <input type="checkbox"/> | GOTERM_BP_ALL          | <a href="#">acetyl-CoA catabolic process</a>                                                | RT                     |          | 4     | 4.3E-1  | 1.0E0     |
| <input type="checkbox"/> | GOTERM_BP_ALL          | <a href="#">aerobic respiration</a>                                                         | RT                     |          | 4     | 4.5E-1  | 1.0E0     |
| <input type="checkbox"/> | GOTERM_BP_ALL          | <a href="#">coenzyme catabolic process</a>                                                  | RT                     |          | 4     | 5.5E-1  | 1.0E0     |
| <input type="checkbox"/> | SP_PIR_KEYWORDS        | <a href="#">Tricarboxylic acid cycle</a>                                                    | RT                     |          | 3     | 5.6E-1  | 9.9E-1    |
| <input type="checkbox"/> | GOTERM_BP_ALL          | <a href="#">cellular respiration</a>                                                        | RT                     |          | 4     | 5.7E-1  | 1.0E0     |
| <input type="checkbox"/> | GOTERM_BP_ALL          | <a href="#">cofactor catabolic process</a>                                                  | RT                     |          | 4     | 6.3E-1  | 1.0E0     |
| <input type="checkbox"/> | KEGG_PATHWAY           | <a href="#">Citrate cycle (TCA cycle)</a>                                                   | RT                     |          | 3     | 7.3E-1  | 9.9E-1    |
|                          | Annotation Cluster 174 |                                                                                             | Enrichment Score: 0.28 | <b>G</b> |       |         |           |
| <input type="checkbox"/> | GOTERM_BP_ALL          | <a href="#">response to UV</a>                                                              | RT                     |          | 5     | 2.5E-1  | 9.9E-1    |
| <input type="checkbox"/> | GOTERM_BP_ALL          | <a href="#">response to radiation</a>                                                       | RT                     |          | 9     | 6.8E-1  | 1.0E0     |
| <input type="checkbox"/> | GOTERM_BP_ALL          | <a href="#">response to light stimulus</a>                                                  | RT                     |          | 6     | 8.4E-1  | 1.0E0     |
|                          | Annotation Cluster 175 |                                                                                             | Enrichment Score: 0.26 | <b>G</b> |       |         |           |
| <input type="checkbox"/> | GOTERM_BP_ALL          | <a href="#">negative regulation of Ras protein signal transduction</a>                      | RT                     |          | 3     | 1.3E-1  | 9.1E-1    |
| <input type="checkbox"/> | GOTERM_BP_ALL          | <a href="#">negative regulation of small GTPase mediated signal transduction</a>            | RT                     |          | 3     | 2.3E-1  | 9.8E-1    |
| <input type="checkbox"/> | GOTERM_BP_ALL          | <a href="#">Ras protein signal transduction</a>                                             | RT                     |          | 12    | 9.7E-1  | 1.0E0     |
| <input type="checkbox"/> | GOTERM_BP_ALL          | <a href="#">regulation of Ras protein signal transduction</a>                               | RT                     |          | 8     | 9.8E-1  | 1.0E0     |
| <input type="checkbox"/> | GOTERM_BP_ALL          | <a href="#">regulation of small GTPase mediated signal transduction</a>                     | RT                     |          | 9     | 1.0E0   | 1.0E0     |
| <input type="checkbox"/> | GOTERM_BP_ALL          | <a href="#">regulation of signal transduction</a>                                           | RT                     |          | 23    | 1.0E0   | 1.0E0     |
|                          | Annotation Cluster 176 |                                                                                             | Enrichment Score: 0.25 | <b>G</b> |       |         |           |
| <input type="checkbox"/> | BIOCARTA               | <a href="#">Erk and PI-3 Kinase Are Necessary for Collagen Binding in Corneal Epithelia</a> | RT                     |          | 4     | 4.1E-1  | 9.5E-1    |
| <input type="checkbox"/> | BIOCARTA               | <a href="#">mCalpain and friends in Cell motility</a>                                       | RT                     |          | 3     | 5.0E-1  | 9.7E-1    |
| <input type="checkbox"/> | BIOCARTA               | <a href="#">Integrin Signaling Pathway</a>                                                  | RT                     |          | 3     | 8.8E-1  | 1.0E0     |
|                          | Annotation Cluster 177 |                                                                                             | Enrichment Score: 0.25 | <b>G</b> |       |         |           |
| <input type="checkbox"/> | GOTERM_MF_ALL          | <a href="#">ligase activity, forming carbon-nitrogen bonds</a>                              | RT                     |          | 21    | 1.8E-1  | 9.6E-1    |
| <input type="checkbox"/> | UP_SEQ_FEATURE         | active site:Glycyl thioester intermediate                                                   | RT                     |          | 6     | 2.6E-1  | 1.0E0     |
| <input type="checkbox"/> | SMART                  | <a href="#">UBCc</a>                                                                        | RT                     |          | 5     | 4.1E-1  | 1.0E0     |
| <input type="checkbox"/> | KEGG_PATHWAY           | <a href="#">Ubiquitin mediated proteolysis</a>                                              | RT                     |          | 13    | 6.4E-1  | 9.9E-1    |
| <input type="checkbox"/> | INTERPRO               | <a href="#">Ubiquitin-conjugating enzyme, E2</a>                                            | RT                     |          | 4     | 7.5E-1  | 1.0E0     |
| <input type="checkbox"/> | GOTERM_MF_ALL          | <a href="#">ubiquitin-protein ligase activity</a>                                           | RT                     |          | 9     | 8.7E-1  | 1.0E0     |
| <input type="checkbox"/> | GOTERM_MF_ALL          | <a href="#">small protein conjugating enzyme activity</a>                                   | RT                     |          | 9     | 8.9E-1  | 1.0E0     |
| <input type="checkbox"/> | GOTERM_MF_ALL          | <a href="#">small conjugating protein ligase activity</a>                                   | RT                     |          | 9     | 9.0E-1  | 1.0E0     |
| <input type="checkbox"/> | GOTERM_MF_ALL          | <a href="#">acid-amino acid ligase activity</a>                                             | RT                     |          | 10    | 9.1E-1  | 1.0E0     |
|                          | Annotation Cluster 178 |                                                                                             | Enrichment Score: 0.24 | <b>G</b> |       |         |           |
| <input type="checkbox"/> | GOTERM_BP_ALL          | <a href="#">negative regulation of caspase activity</a>                                     | RT                     |          | 3     | 2.0E-1  | 9.7E-1    |
| <input type="checkbox"/> | GOTERM_BP_ALL          | <a href="#">regulation of caspase activity</a>                                              | RT                     |          | 6     | 3.6E-1  | 1.0E0     |
| <input type="checkbox"/> | GOTERM_BP_ALL          | <a href="#">apoptotic program</a>                                                           | RT                     |          | 6     | 6.5E-1  | 1.0E0     |
| <input type="checkbox"/> | GOTERM_BP_ALL          | <a href="#">caspase activation</a>                                                          | RT                     |          | 3     | 7.0E-1  | 1.0E0     |
| <input type="checkbox"/> | GOTERM_BP_ALL          | <a href="#">positive regulation of caspase activity</a>                                     | RT                     |          | 3     | 7.7E-1  | 1.0E0     |
| <input type="checkbox"/> | GOTERM_BP_ALL          | <a href="#">positive regulation of hydrolase activity</a>                                   | RT                     |          | 3     | 8.9E-1  | 1.0E0     |
| <input type="checkbox"/> | GOTERM_BP_ALL          | <a href="#">regulation of hydrolase activity</a>                                            | RT                     |          | 7     | 1.0E0   | 1.0E0     |
|                          | Annotation Cluster 179 |                                                                                             | Enrichment Score: 0.23 | <b>G</b> |       |         |           |
| <input type="checkbox"/> | GOTERM_BP_ALL          | <a href="#">negative regulation of MAP kinase activity</a>                                  | RT                     |          | 4     | 2.7E-1  | 9.9E-1    |
| <input type="checkbox"/> | GOTERM_BP_ALL          | <a href="#">negative regulation of catalytic activity</a>                                   | RT                     |          | 8     | 3.4E-1  | 1.0E0     |
| <input type="checkbox"/> | GOTERM_BP_ALL          | <a href="#">negative regulation of protein kinase activity</a>                              | RT                     |          | 6     | 4.3E-1  | 1.0E0     |

| <input type="checkbox"/> | GOTERM_BP_ALL          | <a href="#">negative regulation of kinase activity</a>                                                       | RT |  |  |  |  | 6     | 4.3E-1  | 1.0E0     |
|--------------------------|------------------------|--------------------------------------------------------------------------------------------------------------|----|--|--|--|--|-------|---------|-----------|
| <input type="checkbox"/> | GOTERM_BP_ALL          | <a href="#">negative regulation of transferase activity</a>                                                  | RT |  |  |  |  | 6     | 4.7E-1  | 1.0E0     |
| <input type="checkbox"/> | GOTERM_BP_ALL          | <a href="#">regulation of kinase activity</a>                                                                | RT |  |  |  |  | 15    | 7.5E-1  | 1.0E0     |
| <input type="checkbox"/> | GOTERM_BP_ALL          | <a href="#">regulation of MAP kinase activity</a>                                                            | RT |  |  |  |  | 6     | 7.9E-1  | 1.0E0     |
| <input type="checkbox"/> | GOTERM_BP_ALL          | <a href="#">regulation of transferase activity</a>                                                           | RT |  |  |  |  | 15    | 7.9E-1  | 1.0E0     |
| <input type="checkbox"/> | GOTERM_BP_ALL          | <a href="#">regulation of protein kinase activity</a>                                                        | RT |  |  |  |  | 12    | 9.2E-1  | 1.0E0     |
| <input type="checkbox"/> | GOTERM_BP_ALL          | <a href="#">regulation of a molecular function</a>                                                           | RT |  |  |  |  | 30    | 9.5E-1  | 1.0E0     |
| <input type="checkbox"/> | GOTERM_BP_ALL          | <a href="#">regulation of catalytic activity</a>                                                             | RT |  |  |  |  | 24    | 9.8E-1  | 1.0E0     |
|                          | Annotation Cluster 180 | Enrichment Score: 0.23                                                                                       | G  |  |  |  |  | Count | P_Value | Benjamini |
| <input type="checkbox"/> | GOTERM_CC_ALL          | <a href="#">nuclear envelope-endoplasmic reticulum network</a>                                               | RT |  |  |  |  | 12    | 3.5E-1  | 9.2E-1    |
| <input type="checkbox"/> | GOTERM_CC_ALL          | <a href="#">endoplasmic reticulum membrane</a>                                                               | RT |  |  |  |  | 11    | 4.3E-1  | 9.6E-1    |
| <input type="checkbox"/> | GOTERM_CC_ALL          | <a href="#">integral to endoplasmic reticulum membrane</a>                                                   | RT |  |  |  |  | 4     | 5.9E-1  | 9.9E-1    |
| <input type="checkbox"/> | GOTERM_CC_ALL          | <a href="#">intrinsic to endoplasmic reticulum membrane</a>                                                  | RT |  |  |  |  | 4     | 6.8E-1  | 1.0E0     |
| <input type="checkbox"/> | GOTERM_CC_ALL          | <a href="#">integral to organelle membrane</a>                                                               | RT |  |  |  |  | 6     | 8.2E-1  | 1.0E0     |
| <input type="checkbox"/> | GOTERM_CC_ALL          | <a href="#">intrinsic to organelle membrane</a>                                                              | RT |  |  |  |  | 6     | 8.8E-1  | 1.0E0     |
|                          | Annotation Cluster 181 | Enrichment Score: 0.22                                                                                       | G  |  |  |  |  | Count | P_Value | Benjamini |
| <input type="checkbox"/> | INTERPRO               | <a href="#">Zinc finger, RING/FYVE/PHD-type</a>                                                              | RT |  |  |  |  | 15    | 4.5E-1  | 1.0E0     |
| <input type="checkbox"/> | UP_SEQ_FEATURE         | zinc finger region:RING-type                                                                                 | RT |  |  |  |  | 12    | 5.4E-1  | 1.0E0     |
| <input type="checkbox"/> | SMART                  | <a href="#">RING</a>                                                                                         | RT |  |  |  |  | 17    | 6.1E-1  | 1.0E0     |
| <input type="checkbox"/> | INTERPRO               | <a href="#">Zinc finger, RING-type</a>                                                                       | RT |  |  |  |  | 17    | 8.6E-1  | 1.0E0     |
|                          | Annotation Cluster 182 | Enrichment Score: 0.22                                                                                       | G  |  |  |  |  | Count | P_Value | Benjamini |
| <input type="checkbox"/> | GOTERM_BP_ALL          | <a href="#">somatic hypermutation of immunoglobulin genes</a>                                                | RT |  |  |  |  | 3     | 2.0E-1  | 9.7E-1    |
| <input type="checkbox"/> | GOTERM_BP_ALL          | <a href="#">somatic diversification of immune receptors via somatic mutation</a>                             | RT |  |  |  |  | 3     | 2.0E-1  | 9.7E-1    |
| <input type="checkbox"/> | GOTERM_BP_ALL          | <a href="#">immunoglobulin production</a>                                                                    | RT |  |  |  |  | 4     | 7.4E-1  | 1.0E0     |
| <input type="checkbox"/> | GOTERM_BP_ALL          | <a href="#">production of molecular mediator of immune response</a>                                          | RT |  |  |  |  | 4     | 7.5E-1  | 1.0E0     |
| <input type="checkbox"/> | GOTERM_BP_ALL          | <a href="#">somatic recombination of immunoglobulin gene segments</a>                                        | RT |  |  |  |  | 3     | 7.6E-1  | 1.0E0     |
| <input type="checkbox"/> | GOTERM_BP_ALL          | <a href="#">somatic diversification of immune receptors via germline recombination within a single locus</a> | RT |  |  |  |  | 3     | 7.9E-1  | 1.0E0     |
| <input type="checkbox"/> | GOTERM_BP_ALL          | <a href="#">somatic cell DNA recombination</a>                                                               | RT |  |  |  |  | 3     | 7.9E-1  | 1.0E0     |
| <input type="checkbox"/> | GOTERM_BP_ALL          | <a href="#">somatic diversification of immunoglobulins</a>                                                   | RT |  |  |  |  | 3     | 8.0E-1  | 1.0E0     |
| <input type="checkbox"/> | GOTERM_BP_ALL          | <a href="#">somatic diversification of immune receptors</a>                                                  | RT |  |  |  |  | 3     | 8.3E-1  | 1.0E0     |
| <input type="checkbox"/> | GOTERM_BP_ALL          | <a href="#">immune effector process</a>                                                                      | RT |  |  |  |  | 6     | 1.0E0   | 1.0E0     |
|                          | Annotation Cluster 183 | Enrichment Score: 0.22                                                                                       | G  |  |  |  |  | Count | P_Value | Benjamini |
| <input type="checkbox"/> | GOTERM_MF_ALL          | <a href="#">enzyme binding</a>                                                                               | RT |  |  |  |  | 20    | 4.9E-1  | 1.0E0     |
| <input type="checkbox"/> | GOTERM_MF_ALL          | <a href="#">protein kinase binding</a>                                                                       | RT |  |  |  |  | 7     | 6.3E-1  | 1.0E0     |
| <input type="checkbox"/> | GOTERM_MF_ALL          | <a href="#">kinase binding</a>                                                                               | RT |  |  |  |  | 7     | 7.3E-1  | 1.0E0     |
|                          | Annotation Cluster 184 | Enrichment Score: 0.21                                                                                       | G  |  |  |  |  | Count | P_Value | Benjamini |
| <input type="checkbox"/> | GOTERM_BP_ALL          | <a href="#">glucose transport</a>                                                                            | RT |  |  |  |  | 4     | 5.5E-1  | 1.0E0     |
| <input type="checkbox"/> | GOTERM_BP_ALL          | <a href="#">hexose transport</a>                                                                             | RT |  |  |  |  | 4     | 5.7E-1  | 1.0E0     |
| <input type="checkbox"/> | GOTERM_BP_ALL          | <a href="#">monosaccharide transport</a>                                                                     | RT |  |  |  |  | 4     | 5.7E-1  | 1.0E0     |
| <input type="checkbox"/> | GOTERM_BP_ALL          | <a href="#">carbohydrate transport</a>                                                                       | RT |  |  |  |  | 6     | 7.9E-1  | 1.0E0     |
|                          | Annotation Cluster 185 | Enrichment Score: 0.21                                                                                       | G  |  |  |  |  | Count | P_Value | Benjamini |
| <input type="checkbox"/> | SMART                  | <a href="#">BROMO</a>                                                                                        | RT |  |  |  |  | 4     | 5.0E-1  | 1.0E0     |
| <input type="checkbox"/> | INTERPRO               | <a href="#">Bromodomain</a>                                                                                  | RT |  |  |  |  | 4     | 6.3E-1  | 1.0E0     |
| <input type="checkbox"/> | SP_PIR_KEYWORDS        | <a href="#">bromodomain</a>                                                                                  | RT |  |  |  |  | 3     | 7.7E-1  | 1.0E0     |
|                          | Annotation Cluster 186 | Enrichment Score: 0.2                                                                                        | G  |  |  |  |  | Count | P_Value | Benjamini |
| <input type="checkbox"/> | SP_PIR_KEYWORDS        | <a href="#">GTP binding</a>                                                                                  | RT |  |  |  |  | 7     | 2.0E-1  | 8.1E-1    |

|                          |                        |                                                                                  |          |  |       |         |           |
|--------------------------|------------------------|----------------------------------------------------------------------------------|----------|--|-------|---------|-----------|
| <input type="checkbox"/> | INTERPRO               | <a href="#">Small GTP-binding protein domain</a>                                 | RT       |  | 10    | 8.8E-1  | 1.0E0     |
| <input type="checkbox"/> | INTERPRO               | <a href="#">Ras GTPase</a>                                                       | RT       |  | 8     | 9.7E-1  | 1.0E0     |
| <input type="checkbox"/> | INTERPRO               | <a href="#">Ras</a>                                                              | RT       |  | 6     | 9.7E-1  | 1.0E0     |
|                          | Annotation Cluster 187 | Enrichment Score: 0.17                                                           | <b>G</b> |  | Count | P_Value | Benjamini |
| <input type="checkbox"/> | GOTERM_BP_ALL          | <a href="#">positive regulation of locomotion</a>                                | RT       |  | 4     | 3.8E-1  | 1.0E0     |
| <input type="checkbox"/> | GOTERM_BP_ALL          | <a href="#">positive regulation of cell motility</a>                             | RT       |  | 4     | 3.8E-1  | 1.0E0     |
| <input type="checkbox"/> | GOTERM_BP_ALL          | <a href="#">positive regulation of cell migration</a>                            | RT       |  | 3     | 5.6E-1  | 1.0E0     |
| <input type="checkbox"/> | GOTERM_BP_ALL          | <a href="#">locomotion</a>                                                       | RT       |  | 6     | 9.2E-1  | 1.0E0     |
| <input type="checkbox"/> | GOTERM_BP_ALL          | <a href="#">regulation of cell motility</a>                                      | RT       |  | 5     | 9.3E-1  | 1.0E0     |
| <input type="checkbox"/> | GOTERM_BP_ALL          | <a href="#">regulation of locomotion</a>                                         | RT       |  | 5     | 9.5E-1  | 1.0E0     |
| <input type="checkbox"/> | GOTERM_BP_ALL          | <a href="#">regulation of cell migration</a>                                     | RT       |  | 4     | 9.6E-1  | 1.0E0     |
|                          | Annotation Cluster 188 | Enrichment Score: 0.17                                                           | <b>G</b> |  | Count | P_Value | Benjamini |
| <input type="checkbox"/> | SMART                  | <a href="#">CH</a>                                                               | RT       |  | 5     | 6.0E-1  | 1.0E0     |
| <input type="checkbox"/> | UP_SEQ_FEATURE         | domain:CH                                                                        | RT       |  | 3     | 6.5E-1  | 1.0E0     |
| <input type="checkbox"/> | INTERPRO               | <a href="#">Calponin-like actin-binding</a>                                      | RT       |  | 5     | 7.9E-1  | 1.0E0     |
|                          | Annotation Cluster 189 | Enrichment Score: 0.17                                                           | <b>G</b> |  | Count | P_Value | Benjamini |
| <input type="checkbox"/> | GOTERM_BP_ALL          | <a href="#">skeletal morphogenesis</a>                                           | RT       |  | 4     | 4.0E-1  | 1.0E0     |
| <input type="checkbox"/> | BIOCARTA               | <a href="#">Erk1/Erk2 Mapk Signaling pathway</a>                                 | RT       |  | 5     | 5.2E-1  | 9.6E-1    |
| <input type="checkbox"/> | GOTERM_BP_ALL          | <a href="#">skeletal development</a>                                             | RT       |  | 7     | 1.0E0   | 1.0E0     |
| <input type="checkbox"/> | GOTERM_BP_ALL          | <a href="#">embryonic morphogenesis</a>                                          | RT       |  | 5     | 1.0E0   | 1.0E0     |
|                          | Annotation Cluster 190 | Enrichment Score: 0.17                                                           | <b>G</b> |  | Count | P_Value | Benjamini |
| <input type="checkbox"/> | GOTERM_MF_ALL          | <a href="#">phosphoric monoester hydrolase activity</a>                          | RT       |  | 25    | 3.0E-1  | 9.9E-1    |
| <input type="checkbox"/> | GOTERM_MF_ALL          | <a href="#">protein tyrosine phosphatase activity</a>                            | RT       |  | 9     | 5.4E-1  | 1.0E0     |
| <input type="checkbox"/> | GOTERM_BP_ALL          | <a href="#">protein amino acid dephosphorylation</a>                             | RT       |  | 12    | 5.8E-1  | 1.0E0     |
| <input type="checkbox"/> | GOTERM_MF_ALL          | <a href="#">phosphoric ester hydrolase activity</a>                              | RT       |  | 27    | 5.9E-1  | 1.0E0     |
| <input type="checkbox"/> | GOTERM_MF_ALL          | <a href="#">phosphoprotein phosphatase activity</a>                              | RT       |  | 13    | 7.1E-1  | 1.0E0     |
| <input type="checkbox"/> | GOTERM_BP_ALL          | <a href="#">dephosphorylation</a>                                                | RT       |  | 12    | 7.4E-1  | 1.0E0     |
| <input type="checkbox"/> | SMART                  | <a href="#">PTPc</a>                                                             | RT       |  | 3     | 7.4E-1  | 1.0E0     |
| <input type="checkbox"/> | SP_PIR_KEYWORDS        | <a href="#">protein phosphatase</a>                                              | RT       |  | 9     | 7.6E-1  | 1.0E0     |
| <input type="checkbox"/> | INTERPRO               | <a href="#">Protein-tyrosine phosphatase, Tyr-specific/dual-specificity type</a> | RT       |  | 6     | 8.3E-1  | 1.0E0     |
| <input type="checkbox"/> | INTERPRO               | <a href="#">Protein-tyrosine phosphatase, receptor/non-receptor type</a>         | RT       |  | 3     | 8.6E-1  | 1.0E0     |
| <input type="checkbox"/> | UP_SEQ_FEATURE         | active site:Phosphocysteine intermediate                                         | RT       |  | 4     | 9.1E-1  | 1.0E0     |
| <input type="checkbox"/> | UP_SEQ_FEATURE         | domain:Tyrosine-protein phosphatase                                              | RT       |  | 3     | 9.3E-1  | 1.0E0     |
|                          | Annotation Cluster 191 | Enrichment Score: 0.17                                                           | <b>G</b> |  | Count | P_Value | Benjamini |
| <input type="checkbox"/> | GOTERM_MF_ALL          | <a href="#">protein dimerization activity</a>                                    | RT       |  | 25    | 6.1E-1  | 1.0E0     |
| <input type="checkbox"/> | GOTERM_MF_ALL          | <a href="#">protein homodimerization activity</a>                                | RT       |  | 13    | 6.7E-1  | 1.0E0     |
| <input type="checkbox"/> | GOTERM_MF_ALL          | <a href="#">identical protein binding</a>                                        | RT       |  | 23    | 7.9E-1  | 1.0E0     |
|                          | Annotation Cluster 192 | Enrichment Score: 0.16                                                           | <b>G</b> |  | Count | P_Value | Benjamini |
| <input type="checkbox"/> | GOTERM_BP_ALL          | <a href="#">positive regulation of myeloid leukocyte differentiation</a>         | RT       |  | 3     | 2.7E-1  | 9.9E-1    |
| <input type="checkbox"/> | GOTERM_BP_ALL          | <a href="#">regulation of myeloid leukocyte differentiation</a>                  | RT       |  | 4     | 4.0E-1  | 1.0E0     |
| <input type="checkbox"/> | GOTERM_BP_ALL          | <a href="#">positive regulation of myeloid cell differentiation</a>              | RT       |  | 3     | 5.6E-1  | 1.0E0     |
| <input type="checkbox"/> | GOTERM_BP_ALL          | <a href="#">regulation of osteoclast differentiation</a>                         | RT       |  | 3     | 5.6E-1  | 1.0E0     |
| <input type="checkbox"/> | GOTERM_BP_ALL          | <a href="#">regulation of myeloid cell differentiation</a>                       | RT       |  | 5     | 6.3E-1  | 1.0E0     |
| <input type="checkbox"/> | GOTERM_BP_ALL          | <a href="#">osteoclast differentiation</a>                                       | RT       |  | 3     | 6.8E-1  | 1.0E0     |
| <input type="checkbox"/> | GOTERM_BP_ALL          | <a href="#">myeloid cell differentiation</a>                                     | RT       |  | 9     | 8.2E-1  | 1.0E0     |
| <input type="checkbox"/> | GOTERM_BP_ALL          | <a href="#">positive regulation of developmental process</a>                     | RT       |  | 7     | 8.3E-1  | 1.0E0     |
| <input type="checkbox"/> | GOTERM_BP_ALL          | <a href="#">myeloid leukocyte differentiation</a>                                | RT       |  | 4     | 8.5E-1  | 1.0E0     |
| <input type="checkbox"/> | GOTERM_BP_ALL          | <a href="#">positive regulation of cell differentiation</a>                      | RT       |  | 4     | 9.2E-1  | 1.0E0     |

| <input type="checkbox"/> |                        |                                                              |                    |  |  |  |  |       |         |           |  |
|--------------------------|------------------------|--------------------------------------------------------------|--------------------|--|--|--|--|-------|---------|-----------|--|
| <input type="checkbox"/> | GOTERM_BP_ALL          | <a href="#">leukocyte differentiation</a>                    | <a href="#">RT</a> |  |  |  |  | 9     | 9.7E-1  | 1.0E0     |  |
| <input type="checkbox"/> | GOTERM_BP_ALL          | <a href="#">regulation of cell differentiation</a>           | <a href="#">RT</a> |  |  |  |  | 7     | 1.0E0   | 1.0E0     |  |
| <input type="checkbox"/> | GOTERM_BP_ALL          | <a href="#">regulation of developmental process</a>          | <a href="#">RT</a> |  |  |  |  | 13    | 1.0E0   | 1.0E0     |  |
|                          | Annotation Cluster 193 | Enrichment Score: 0.16                                       | <b>G</b>           |  |  |  |  | Count | P_Value | Benjamini |  |
| <input type="checkbox"/> | GOTERM_BP_ALL          | <a href="#">anti-apoptosis</a>                               | <a href="#">RT</a> |  |  |  |  | 15    | 9.7E-2  | 8.5E-1    |  |
| <input type="checkbox"/> | GOTERM_BP_ALL          | <a href="#">negative regulation of programmed cell death</a> | <a href="#">RT</a> |  |  |  |  | 22    | 2.9E-1  | 9.9E-1    |  |
| <input type="checkbox"/> | GOTERM_BP_ALL          | <a href="#">negative regulation of apoptosis</a>             | <a href="#">RT</a> |  |  |  |  | 20    | 4.4E-1  | 1.0E0     |  |
| <input type="checkbox"/> | GOTERM_BP_ALL          | <a href="#">death</a>                                        | <a href="#">RT</a> |  |  |  |  | 68    | 4.9E-1  | 1.0E0     |  |
| <input type="checkbox"/> | GOTERM_BP_ALL          | <a href="#">cell death</a>                                   | <a href="#">RT</a> |  |  |  |  | 68    | 4.9E-1  | 1.0E0     |  |
| <input type="checkbox"/> | SP_PIR_KEYWORDS        | <a href="#">apoptosis</a>                                    | <a href="#">RT</a> |  |  |  |  | 24    | 6.2E-1  | 1.0E0     |  |
| <input type="checkbox"/> | GOTERM_BP_ALL          | <a href="#">programmed cell death</a>                        | <a href="#">RT</a> |  |  |  |  | 62    | 6.8E-1  | 1.0E0     |  |
| <input type="checkbox"/> | GOTERM_BP_ALL          | <a href="#">apoptosis</a>                                    | <a href="#">RT</a> |  |  |  |  | 60    | 7.2E-1  | 1.0E0     |  |
| <input type="checkbox"/> | GOTERM_BP_ALL          | <a href="#">regulation of programmed cell death</a>          | <a href="#">RT</a> |  |  |  |  | 39    | 8.2E-1  | 1.0E0     |  |
| <input type="checkbox"/> | GOTERM_BP_ALL          | <a href="#">regulation of apoptosis</a>                      | <a href="#">RT</a> |  |  |  |  | 37    | 8.7E-1  | 1.0E0     |  |
| <input type="checkbox"/> | GOTERM_BP_ALL          | <a href="#">cell development</a>                             | <a href="#">RT</a> |  |  |  |  | 85    | 1.0E0   | 1.0E0     |  |
| <input type="checkbox"/> | GOTERM_BP_ALL          | <a href="#">cellular developmental process</a>               | <a href="#">RT</a> |  |  |  |  | 118   | 1.0E0   | 1.0E0     |  |
| <input type="checkbox"/> | GOTERM_BP_ALL          | <a href="#">cell differentiation</a>                         | <a href="#">RT</a> |  |  |  |  | 118   | 1.0E0   | 1.0E0     |  |
| <input type="checkbox"/> | GOTERM_BP_ALL          | <a href="#">developmental process</a>                        | <a href="#">RT</a> |  |  |  |  | 187   | 1.0E0   | 1.0E0     |  |
| <input type="checkbox"/> | GOTERM_BP_ALL          | <a href="#">organ development</a>                            | <a href="#">RT</a> |  |  |  |  | 66    | 1.0E0   | 1.0E0     |  |
| <input type="checkbox"/> | GOTERM_BP_ALL          | <a href="#">anatomical structure morphogenesis</a>           | <a href="#">RT</a> |  |  |  |  | 50    | 1.0E0   | 1.0E0     |  |
| <input type="checkbox"/> | GOTERM_BP_ALL          | <a href="#">multicellular organismal development</a>         | <a href="#">RT</a> |  |  |  |  | 122   | 1.0E0   | 1.0E0     |  |
| <input type="checkbox"/> | GOTERM_BP_ALL          | <a href="#">system development</a>                           | <a href="#">RT</a> |  |  |  |  | 85    | 1.0E0   | 1.0E0     |  |
| <input type="checkbox"/> | GOTERM_BP_ALL          | <a href="#">anatomical structure development</a>             | <a href="#">RT</a> |  |  |  |  | 101   | 1.0E0   | 1.0E0     |  |
| <input type="checkbox"/> | GOTERM_BP_ALL          | <a href="#">multicellular organismal process</a>             | <a href="#">RT</a> |  |  |  |  | 138   | 1.0E0   | 1.0E0     |  |
|                          | Annotation Cluster 194 | Enrichment Score: 0.16                                       | <b>G</b>           |  |  |  |  | Count | P_Value | Benjamini |  |
| <input type="checkbox"/> | GOTERM_MF_ALL          | <a href="#">transcription factor binding</a>                 | <a href="#">RT</a> |  |  |  |  | 22    | 6.1E-1  | 1.0E0     |  |
| <input type="checkbox"/> | GOTERM_MF_ALL          | <a href="#">transcription coactivator activity</a>           | <a href="#">RT</a> |  |  |  |  | 8     | 6.3E-1  | 1.0E0     |  |
| <input type="checkbox"/> | GOTERM_MF_ALL          | <a href="#">transcription activator activity</a>             | <a href="#">RT</a> |  |  |  |  | 19    | 6.8E-1  | 1.0E0     |  |
| <input type="checkbox"/> | GOTERM_MF_ALL          | <a href="#">transcription cofactor activity</a>              | <a href="#">RT</a> |  |  |  |  | 11    | 9.1E-1  | 1.0E0     |  |
|                          | Annotation Cluster 195 | Enrichment Score: 0.15                                       | <b>G</b>           |  |  |  |  | Count | P_Value | Benjamini |  |
| <input type="checkbox"/> | GOTERM_BP_ALL          | <a href="#">hair cycle process</a>                           | <a href="#">RT</a> |  |  |  |  | 4     | 6.1E-1  | 1.0E0     |  |
| <input type="checkbox"/> | GOTERM_BP_ALL          | <a href="#">hair follicle development</a>                    | <a href="#">RT</a> |  |  |  |  | 4     | 6.1E-1  | 1.0E0     |  |
| <input type="checkbox"/> | GOTERM_BP_ALL          | <a href="#">molting cycle process</a>                        | <a href="#">RT</a> |  |  |  |  | 4     | 6.1E-1  | 1.0E0     |  |
| <input type="checkbox"/> | GOTERM_BP_ALL          | <a href="#">molting cycle</a>                                | <a href="#">RT</a> |  |  |  |  | 4     | 6.3E-1  | 1.0E0     |  |
| <input type="checkbox"/> | GOTERM_BP_ALL          | <a href="#">hair cycle</a>                                   | <a href="#">RT</a> |  |  |  |  | 4     | 6.3E-1  | 1.0E0     |  |
| <input type="checkbox"/> | GOTERM_BP_ALL          | <a href="#">epidermis development</a>                        | <a href="#">RT</a> |  |  |  |  | 8     | 7.9E-1  | 1.0E0     |  |
| <input type="checkbox"/> | GOTERM_BP_ALL          | <a href="#">ectoderm development</a>                         | <a href="#">RT</a> |  |  |  |  | 8     | 8.3E-1  | 1.0E0     |  |
| <input type="checkbox"/> | GOTERM_BP_ALL          | <a href="#">tissue development</a>                           | <a href="#">RT</a> |  |  |  |  | 15    | 1.0E0   | 1.0E0     |  |
|                          | Annotation Cluster 196 | Enrichment Score: 0.15                                       | <b>G</b>           |  |  |  |  | Count | P_Value | Benjamini |  |
| <input type="checkbox"/> | GOTERM_MF_ALL          | <a href="#">protein tyrosine phosphatase activity</a>        | <a href="#">RT</a> |  |  |  |  | 9     | 5.4E-1  | 1.0E0     |  |
| <input type="checkbox"/> | SP_PIR_KEYWORDS        | <a href="#">tyrosine-specific phosphatase</a>                | <a href="#">RT</a> |  |  |  |  | 3     | 7.0E-1  | 1.0E0     |  |
| <input type="checkbox"/> | SP_PIR_KEYWORDS        | <a href="#">phosphoric monoester hydrolase</a>               | <a href="#">RT</a> |  |  |  |  | 3     | 9.4E-1  | 1.0E0     |  |
|                          | Annotation Cluster 197 | Enrichment Score: 0.14                                       | <b>G</b>           |  |  |  |  | Count | P_Value | Benjamini |  |
| <input type="checkbox"/> | GOTERM_BP_ALL          | <a href="#">gluconeogenesis</a>                              | <a href="#">RT</a> |  |  |  |  | 3     | 5.3E-1  | 1.0E0     |  |
| <input type="checkbox"/> | GOTERM_BP_ALL          | <a href="#">pyruvate metabolic process</a>                   | <a href="#">RT</a> |  |  |  |  | 3     | 6.6E-1  | 1.0E0     |  |
| <input type="checkbox"/> | GOTERM_BP_ALL          | <a href="#">hexose biosynthetic process</a>                  | <a href="#">RT</a> |  |  |  |  | 3     | 7.0E-1  | 1.0E0     |  |
| <input type="checkbox"/> | GOTERM_BP_ALL          | <a href="#">monosaccharide biosynthetic process</a>          | <a href="#">RT</a> |  |  |  |  | 3     | 7.4E-1  | 1.0E0     |  |
| <input type="checkbox"/> | GOTERM_BP_ALL          | <a href="#">alcohol biosynthetic process</a>                 | <a href="#">RT</a> |  |  |  |  | 3     | 7.4E-1  | 1.0E0     |  |
| <input type="checkbox"/> | GOTERM_BP_ALL          | <a href="#">glucose metabolic process</a>                    | <a href="#">RT</a> |  |  |  |  | 9     | 8.1E-1  | 1.0E0     |  |

| <input type="checkbox"/> | GOTERM_BP_ALL          | <a href="#">carbohydrate biosynthetic process</a>                   | RT       |  |  |  |  | 6     | 9.4E-1  | 1.0E0     |
|--------------------------|------------------------|---------------------------------------------------------------------|----------|--|--|--|--|-------|---------|-----------|
|                          | Annotation Cluster 198 | Enrichment Score: 0.14                                              | <b>G</b> |  |  |  |  | Count | P_Value | Benjamini |
| <input type="checkbox"/> | GOTERM_BP_ALL          | <a href="#">regulation of neuron apoptosis</a>                      | RT       |  |  |  |  | 5     | 6.5E-1  | 1.0E0     |
| <input type="checkbox"/> | GOTERM_BP_ALL          | <a href="#">neuron apoptosis</a>                                    | RT       |  |  |  |  | 5     | 7.4E-1  | 1.0E0     |
| <input type="checkbox"/> | GOTERM_BP_ALL          | <a href="#">negative regulation of neuron apoptosis</a>             | RT       |  |  |  |  | 3     | 7.9E-1  | 1.0E0     |
|                          | Annotation Cluster 199 | Enrichment Score: 0.14                                              | <b>G</b> |  |  |  |  | Count | P_Value | Benjamini |
| <input type="checkbox"/> | GOTERM_CC_ALL          | <a href="#">microbody</a>                                           | RT       |  |  |  |  | 8     | 6.7E-1  | 1.0E0     |
| <input type="checkbox"/> | GOTERM_CC_ALL          | <a href="#">peroxisome</a>                                          | RT       |  |  |  |  | 8     | 6.7E-1  | 1.0E0     |
| <input type="checkbox"/> | SP_PIR_KEYWORDS        | <a href="#">peroxisome</a>                                          | RT       |  |  |  |  | 7     | 7.5E-1  | 1.0E0     |
| <input type="checkbox"/> | UP_SEQ_FEATURE         | short sequence motif:Microbody targeting signal                     | RT       |  |  |  |  | 3     | 8.1E-1  | 1.0E0     |
|                          | Annotation Cluster 200 | Enrichment Score: 0.14                                              | <b>G</b> |  |  |  |  | Count | P_Value | Benjamini |
| <input type="checkbox"/> | GOTERM_MF_ALL          | <a href="#">anion:cation symporter activity</a>                     | RT       |  |  |  |  | 3     | 4.8E-1  | 1.0E0     |
| <input type="checkbox"/> | GOTERM_MF_ALL          | <a href="#">organic acid:sodium symporter activity</a>              | RT       |  |  |  |  | 3     | 5.7E-1  | 1.0E0     |
| <input type="checkbox"/> | GOTERM_MF_ALL          | <a href="#">carboxylic acid transmembrane transporter activity</a>  | RT       |  |  |  |  | 7     | 5.7E-1  | 1.0E0     |
| <input type="checkbox"/> | GOTERM_MF_ALL          | <a href="#">organic acid transmembrane transporter activity</a>     | RT       |  |  |  |  | 7     | 5.9E-1  | 1.0E0     |
| <input type="checkbox"/> | GOTERM_MF_ALL          | <a href="#">solute:cation symporter activity</a>                    | RT       |  |  |  |  | 5     | 7.3E-1  | 1.0E0     |
| <input type="checkbox"/> | GOTERM_MF_ALL          | <a href="#">solute:sodium symporter activity</a>                    | RT       |  |  |  |  | 4     | 7.5E-1  | 1.0E0     |
| <input type="checkbox"/> | GOTERM_MF_ALL          | <a href="#">symporter activity</a>                                  | RT       |  |  |  |  | 10    | 9.0E-1  | 1.0E0     |
| <input type="checkbox"/> | GOTERM_MF_ALL          | <a href="#">secondary active transmembrane transporter activity</a> | RT       |  |  |  |  | 12    | 9.5E-1  | 1.0E0     |
| <input type="checkbox"/> | SP_PIR_KEYWORDS        | <a href="#">Symport</a>                                             | RT       |  |  |  |  | 5     | 9.6E-1  | 1.0E0     |
| <input type="checkbox"/> | GOTERM_MF_ALL          | <a href="#">anion transmembrane transporter activity</a>            | RT       |  |  |  |  | 6     | 9.8E-1  | 1.0E0     |
|                          | Annotation Cluster 201 | Enrichment Score: 0.13                                              | <b>G</b> |  |  |  |  | Count | P_Value | Benjamini |
| <input type="checkbox"/> | GOTERM_BP_ALL          | <a href="#">multicellular organismal homeostasis</a>                | RT       |  |  |  |  | 3     | 7.2E-1  | 1.0E0     |
| <input type="checkbox"/> | GOTERM_BP_ALL          | <a href="#">tissue homeostasis</a>                                  | RT       |  |  |  |  | 3     | 7.2E-1  | 1.0E0     |
| <input type="checkbox"/> | KEGG_PATHWAY           | <a href="#">Renal cell carcinoma</a>                                | RT       |  |  |  |  | 7     | 7.7E-1  | 1.0E0     |
|                          | Annotation Cluster 202 | Enrichment Score: 0.13                                              | <b>G</b> |  |  |  |  | Count | P_Value | Benjamini |
| <input type="checkbox"/> | GOTERM_BP_ALL          | <a href="#">cytolysis</a>                                           | RT       |  |  |  |  | 6     | 7.2E-2  | 7.7E-1    |
| <input type="checkbox"/> | SP_PIR_KEYWORDS        | <a href="#">cytolysis</a>                                           | RT       |  |  |  |  | 3     | 4.4E-1  | 9.8E-1    |
| <input type="checkbox"/> | SP_PIR_KEYWORDS        | <a href="#">serine proteinase</a>                                   | RT       |  |  |  |  | 6     | 5.4E-1  | 9.9E-1    |
| <input type="checkbox"/> | PIR_SUPERFAMILY        | PIRSF001135:trypsin                                                 | RT       |  |  |  |  | 6     | 7.0E-1  | 1.0E0     |
| <input type="checkbox"/> | SP_PIR_KEYWORDS        | <a href="#">T-cell</a>                                              | RT       |  |  |  |  | 3     | 7.9E-1  | 1.0E0     |
| <input type="checkbox"/> | UP_SEQ_FEATURE         | domain:Peptidase S1                                                 | RT       |  |  |  |  | 5     | 8.9E-1  | 1.0E0     |
| <input type="checkbox"/> | SMART                  | <a href="#">Tryp_SPc</a>                                            | RT       |  |  |  |  | 5     | 9.7E-1  | 1.0E0     |
| <input type="checkbox"/> | SP_PIR_KEYWORDS        | <a href="#">Zymogen</a>                                             | RT       |  |  |  |  | 11    | 9.8E-1  | 1.0E0     |
| <input type="checkbox"/> | UP_SEQ_FEATURE         | active site:Charge relay system                                     | RT       |  |  |  |  | 7     | 9.8E-1  | 1.0E0     |
| <input type="checkbox"/> | SP_PIR_KEYWORDS        | <a href="#">serine protease</a>                                     | RT       |  |  |  |  | 7     | 9.9E-1  | 1.0E0     |
| <input type="checkbox"/> | GOTERM_MF_ALL          | <a href="#">serine-type endopeptidase activity</a>                  | RT       |  |  |  |  | 10    | 9.9E-1  | 1.0E0     |
| <input type="checkbox"/> | INTERPRO               | <a href="#">Peptidase S1 and S6, chymotrypsin/Hap</a>               | RT       |  |  |  |  | 5     | 9.9E-1  | 1.0E0     |
| <input type="checkbox"/> | GOTERM_MF_ALL          | <a href="#">serine hydrolase activity</a>                           | RT       |  |  |  |  | 10    | 1.0E0   | 1.0E0     |
| <input type="checkbox"/> | GOTERM_MF_ALL          | <a href="#">serine-type peptidase activity</a>                      | RT       |  |  |  |  | 10    | 1.0E0   | 1.0E0     |
| <input type="checkbox"/> | INTERPRO               | <a href="#">Peptidase S1A, chymotrypsin</a>                         | RT       |  |  |  |  | 4     | 1.0E0   | 1.0E0     |
| <input type="checkbox"/> | GOTERM_MF_ALL          | <a href="#">endopeptidase activity</a>                              | RT       |  |  |  |  | 22    | 1.0E0   | 1.0E0     |
|                          | Annotation Cluster 203 | Enrichment Score: 0.12                                              | <b>G</b> |  |  |  |  | Count | P_Value | Benjamini |
| <input type="checkbox"/> | UP_SEQ_FEATURE         | domain:B30.2/SPRY                                                   | RT       |  |  |  |  | 4     | 4.8E-1  | 1.0E0     |
| <input type="checkbox"/> | SMART                  | <a href="#">SPRY</a>                                                | RT       |  |  |  |  | 4     | 8.2E-1  | 1.0E0     |
| <input type="checkbox"/> | INTERPRO               | <a href="#">SP1a/Ryanodine receptor SPRY</a>                        | RT       |  |  |  |  | 4     | 9.0E-1  | 1.0E0     |
| <input type="checkbox"/> | INTERPRO               | <a href="#">B302, (SPRY)-like</a>                                   | RT       |  |  |  |  | 4     | 9.1E-1  | 1.0E0     |
|                          | Annotation Cluster 204 | Enrichment Score: 0.12                                              | <b>G</b> |  |  |  |  | Count | P_Value | Benjamini |
| <input type="checkbox"/> | GOTERM_MF_ALL          | <a href="#">carboxylic acid transmembrane</a>                       | RT       |  |  |  |  | 7     | 5.7E-1  | 1.0E0     |

| <input type="checkbox"/> |                        | <a href="#">transporter activity</a>                                 | <a href="#">RT</a> |  |  |  |  | 7     | 5.7E-1  | 1.0E0     |
|--------------------------|------------------------|----------------------------------------------------------------------|--------------------|--|--|--|--|-------|---------|-----------|
| <input type="checkbox"/> | GOTERM_MF_ALL          | <a href="#">organic acid transmembrane transporter activity</a>      | <a href="#">RT</a> |  |  |  |  | 7     | 5.9E-1  | 1.0E0     |
| <input type="checkbox"/> | GOTERM_MF_ALL          | <a href="#">amino acid transmembrane transporter activity</a>        | <a href="#">RT</a> |  |  |  |  | 5     | 6.3E-1  | 1.0E0     |
| <input type="checkbox"/> | GOTERM_BP_ALL          | <a href="#">carboxylic acid transport</a>                            | <a href="#">RT</a> |  |  |  |  | 5     | 8.6E-1  | 1.0E0     |
| <input type="checkbox"/> | GOTERM_BP_ALL          | <a href="#">organic acid transport</a>                               | <a href="#">RT</a> |  |  |  |  | 5     | 8.7E-1  | 1.0E0     |
| <input type="checkbox"/> | GOTERM_BP_ALL          | <a href="#">amino acid transport</a>                                 | <a href="#">RT</a> |  |  |  |  | 3     | 9.5E-1  | 1.0E0     |
| <input type="checkbox"/> | GOTERM_BP_ALL          | <a href="#">amine transport</a>                                      | <a href="#">RT</a> |  |  |  |  | 3     | 9.8E-1  | 1.0E0     |
|                          | Annotation Cluster 205 | Enrichment Score: 0.1                                                | <b>G</b>           |  |  |  |  | Count | P_Value | Benjamini |
| <input type="checkbox"/> | SMART                  | <a href="#">Sema</a>                                                 | <a href="#">RT</a> |  |  |  |  | 3     | 6.5E-1  | 1.0E0     |
| <input type="checkbox"/> | INTERPRO               | <a href="#">Plexin</a>                                               | <a href="#">RT</a> |  |  |  |  | 3     | 7.7E-1  | 1.0E0     |
| <input type="checkbox"/> | INTERPRO               | <a href="#">Semaphorin/CD100 antigen</a>                             | <a href="#">RT</a> |  |  |  |  | 3     | 7.9E-1  | 1.0E0     |
| <input type="checkbox"/> | SMART                  | <a href="#">PSI</a>                                                  | <a href="#">RT</a> |  |  |  |  | 3     | 8.3E-1  | 1.0E0     |
| <input type="checkbox"/> | INTERPRO               | <a href="#">Plexin/semaphorin/integrin</a>                           | <a href="#">RT</a> |  |  |  |  | 3     | 9.2E-1  | 1.0E0     |
|                          | Annotation Cluster 206 | Enrichment Score: 0.1                                                | <b>G</b>           |  |  |  |  | Count | P_Value | Benjamini |
| <input type="checkbox"/> | SMART                  | <a href="#">S_TK_X</a>                                               | <a href="#">RT</a> |  |  |  |  | 4     | 7.1E-1  | 1.0E0     |
| <input type="checkbox"/> | INTERPRO               | <a href="#">Protein kinase, C-terminal</a>                           | <a href="#">RT</a> |  |  |  |  | 4     | 8.5E-1  | 1.0E0     |
| <input type="checkbox"/> | UP_SEQ_FEATURE         | domain:AGC-kinase C-terminal                                         | <a href="#">RT</a> |  |  |  |  | 4     | 8.6E-1  | 1.0E0     |
|                          | Annotation Cluster 207 | Enrichment Score: 0.09                                               | <b>G</b>           |  |  |  |  | Count | P_Value | Benjamini |
| <input type="checkbox"/> | SP_PIR_KEYWORDS        | <a href="#">aminopeptidase</a>                                       | <a href="#">RT</a> |  |  |  |  | 3     | 6.8E-1  | 1.0E0     |
| <input type="checkbox"/> | GOTERM_MF_ALL          | <a href="#">aminopeptidase activity</a>                              | <a href="#">RT</a> |  |  |  |  | 4     | 6.9E-1  | 1.0E0     |
| <input type="checkbox"/> | GOTERM_MF_ALL          | <a href="#">metalloexopeptidase activity</a>                         | <a href="#">RT</a> |  |  |  |  | 4     | 9.0E-1  | 1.0E0     |
| <input type="checkbox"/> | GOTERM_MF_ALL          | <a href="#">exopeptidase activity</a>                                | <a href="#">RT</a> |  |  |  |  | 4     | 9.9E-1  | 1.0E0     |
|                          | Annotation Cluster 208 | Enrichment Score: 0.09                                               | <b>G</b>           |  |  |  |  | Count | P_Value | Benjamini |
| <input type="checkbox"/> | GOTERM_BP_ALL          | <a href="#">female gonad development</a>                             | <a href="#">RT</a> |  |  |  |  | 5     | 5.2E-1  | 1.0E0     |
| <input type="checkbox"/> | GOTERM_BP_ALL          | <a href="#">female sex differentiation</a>                           | <a href="#">RT</a> |  |  |  |  | 5     | 5.6E-1  | 1.0E0     |
| <input type="checkbox"/> | GOTERM_BP_ALL          | <a href="#">development of primary female sexual characteristics</a> | <a href="#">RT</a> |  |  |  |  | 5     | 5.6E-1  | 1.0E0     |
| <input type="checkbox"/> | GOTERM_BP_ALL          | <a href="#">development of primary sexual characteristics</a>        | <a href="#">RT</a> |  |  |  |  | 6     | 7.6E-1  | 1.0E0     |
| <input type="checkbox"/> | GOTERM_BP_ALL          | <a href="#">male sex differentiation</a>                             | <a href="#">RT</a> |  |  |  |  | 3     | 7.9E-1  | 1.0E0     |
| <input type="checkbox"/> | GOTERM_BP_ALL          | <a href="#">gonad development</a>                                    | <a href="#">RT</a> |  |  |  |  | 5     | 8.2E-1  | 1.0E0     |
| <input type="checkbox"/> | GOTERM_BP_ALL          | <a href="#">reproductive structure development</a>                   | <a href="#">RT</a> |  |  |  |  | 5     | 8.4E-1  | 1.0E0     |
| <input type="checkbox"/> | GOTERM_BP_ALL          | <a href="#">menstrual cycle phase</a>                                | <a href="#">RT</a> |  |  |  |  | 3     | 8.4E-1  | 1.0E0     |
| <input type="checkbox"/> | GOTERM_BP_ALL          | <a href="#">menstrual cycle process</a>                              | <a href="#">RT</a> |  |  |  |  | 3     | 8.5E-1  | 1.0E0     |
| <input type="checkbox"/> | GOTERM_BP_ALL          | <a href="#">sex differentiation</a>                                  | <a href="#">RT</a> |  |  |  |  | 7     | 8.6E-1  | 1.0E0     |
| <input type="checkbox"/> | GOTERM_BP_ALL          | <a href="#">reproductive developmental process</a>                   | <a href="#">RT</a> |  |  |  |  | 7     | 9.1E-1  | 1.0E0     |
| <input type="checkbox"/> | GOTERM_BP_ALL          | <a href="#">cell maturation</a>                                      | <a href="#">RT</a> |  |  |  |  | 6     | 9.2E-1  | 1.0E0     |
| <input type="checkbox"/> | GOTERM_BP_ALL          | <a href="#">menstrual cycle</a>                                      | <a href="#">RT</a> |  |  |  |  | 3     | 9.2E-1  | 1.0E0     |
| <input type="checkbox"/> | GOTERM_BP_ALL          | <a href="#">rhythmic process</a>                                     | <a href="#">RT</a> |  |  |  |  | 5     | 9.5E-1  | 1.0E0     |
| <input type="checkbox"/> | GOTERM_BP_ALL          | <a href="#">multicellular organism reproduction</a>                  | <a href="#">RT</a> |  |  |  |  | 4     | 9.8E-1  | 1.0E0     |
| <input type="checkbox"/> | GOTERM_BP_ALL          | <a href="#">reproductive process in a multicellular organism</a>     | <a href="#">RT</a> |  |  |  |  | 4     | 9.8E-1  | 1.0E0     |
| <input type="checkbox"/> | GOTERM_BP_ALL          | <a href="#">reproductive process</a>                                 | <a href="#">RT</a> |  |  |  |  | 14    | 9.9E-1  | 1.0E0     |
|                          | Annotation Cluster 209 | Enrichment Score: 0.08                                               | <b>G</b>           |  |  |  |  | Count | P_Value | Benjamini |
| <input type="checkbox"/> | SP_PIR_KEYWORDS        | <a href="#">cholesterol metabolism</a>                               | <a href="#">RT</a> |  |  |  |  | 3     | 6.8E-1  | 1.0E0     |
| <input type="checkbox"/> | SP_PIR_KEYWORDS        | <a href="#">steroid metabolism</a>                                   | <a href="#">RT</a> |  |  |  |  | 3     | 8.3E-1  | 1.0E0     |
| <input type="checkbox"/> | SP_PIR_KEYWORDS        | <a href="#">lipid metabolism</a>                                     | <a href="#">RT</a> |  |  |  |  | 5     | 9.9E-1  | 1.0E0     |
|                          | Annotation Cluster 210 | Enrichment Score: 0.08                                               | <b>G</b>           |  |  |  |  | Count | P_Value | Benjamini |
| <input type="checkbox"/> | UP_SEQ_FEATURE         | domain:SH3 1                                                         | <a href="#">RT</a> |  |  |  |  | 3     | 5.1E-1  | 1.0E0     |
| <input type="checkbox"/> | UP_SEQ_FEATURE         | domain:SH3 2                                                         | <a href="#">RT</a> |  |  |  |  | 3     | 5.4E-1  | 1.0E0     |
| <input type="checkbox"/> | INTERPRO               | <a href="#">Variant SH3</a>                                          | <a href="#">RT</a> |  |  |  |  | 3     | 9.5E-1  | 1.0E0     |

|                          |                        |                                                                              |                    |  |       |         |           |
|--------------------------|------------------------|------------------------------------------------------------------------------|--------------------|--|-------|---------|-----------|
| <input type="checkbox"/> | SMART                  | <a href="#">SH3</a>                                                          | <a href="#">RT</a> |  | 6     | 1.0E0   | 1.0E0     |
| <input type="checkbox"/> | INTERPRO               | <a href="#">Src homology-3</a>                                               | <a href="#">RT</a> |  | 6     | 1.0E0   | 1.0E0     |
| <input type="checkbox"/> | UP_SEQ_FEATURE         | domain:SH3                                                                   | <a href="#">RT</a> |  | 3     | 1.0E0   | 1.0E0     |
| <input type="checkbox"/> | SP_PIR_KEYWORDS        | <a href="#">SH3 domain</a>                                                   | <a href="#">RT</a> |  | 6     | 1.0E0   | 1.0E0     |
|                          | Annotation Cluster 211 | Enrichment Score: 0.08                                                       | <b>G</b>           |  | Count | P_Value | Benjamini |
| <input type="checkbox"/> | GOTERM_MF_ALL          | <a href="#">chemokine receptor binding</a>                                   | <a href="#">RT</a> |  | 5     | 5.4E-1  | 1.0E0     |
| <input type="checkbox"/> | INTERPRO               | <a href="#">Small chemokine, C-C</a>                                         | <a href="#">RT</a> |  | 3     | 6.0E-1  | 1.0E0     |
| <input type="checkbox"/> | PIR_SUPERFAMILY        | PIRSF001950:small inducible chemokine, C/CC types                            | <a href="#">RT</a> |  | 3     | 6.1E-1  | 1.0E0     |
| <input type="checkbox"/> | GOTERM_BP_ALL          | <a href="#">leukocyte chemotaxis</a>                                         | <a href="#">RT</a> |  | 3     | 6.6E-1  | 1.0E0     |
| <input type="checkbox"/> | GOTERM_MF_ALL          | <a href="#">G-protein-coupled receptor binding</a>                           | <a href="#">RT</a> |  | 6     | 7.1E-1  | 1.0E0     |
| <input type="checkbox"/> | GOTERM_MF_ALL          | <a href="#">chemokine activity</a>                                           | <a href="#">RT</a> |  | 4     | 7.3E-1  | 1.0E0     |
| <input type="checkbox"/> | SMART                  | <a href="#">SCY</a>                                                          | <a href="#">RT</a> |  | 3     | 7.5E-1  | 1.0E0     |
| <input type="checkbox"/> | SP_PIR_KEYWORDS        | <a href="#">chemotaxis</a>                                                   | <a href="#">RT</a> |  | 5     | 7.9E-1  | 1.0E0     |
| <input type="checkbox"/> | GOTERM_BP_ALL          | <a href="#">taxis</a>                                                        | <a href="#">RT</a> |  | 9     | 8.2E-1  | 1.0E0     |
| <input type="checkbox"/> | GOTERM_BP_ALL          | <a href="#">chemotaxis</a>                                                   | <a href="#">RT</a> |  | 9     | 8.2E-1  | 1.0E0     |
| <input type="checkbox"/> | SP_PIR_KEYWORDS        | <a href="#">pyrrolidone carboxylic acid</a>                                  | <a href="#">RT</a> |  | 3     | 8.6E-1  | 1.0E0     |
| <input type="checkbox"/> | INTERPRO               | <a href="#">Small chemokine, interleukin-8-like</a>                          | <a href="#">RT</a> |  | 3     | 8.7E-1  | 1.0E0     |
| <input type="checkbox"/> | SP_PIR_KEYWORDS        | <a href="#">inflammatory response</a>                                        | <a href="#">RT</a> |  | 4     | 9.5E-1  | 1.0E0     |
| <input type="checkbox"/> | GOTERM_MF_ALL          | <a href="#">cytokine activity</a>                                            | <a href="#">RT</a> |  | 12    | 9.9E-1  | 1.0E0     |
| <input type="checkbox"/> | SP_PIR_KEYWORDS        | <a href="#">cytokine</a>                                                     | <a href="#">RT</a> |  | 8     | 1.0E0   | 1.0E0     |
| <input type="checkbox"/> | GOTERM_BP_ALL          | <a href="#">locomotory behavior</a>                                          | <a href="#">RT</a> |  | 10    | 1.0E0   | 1.0E0     |
| <input type="checkbox"/> | GOTERM_BP_ALL          | <a href="#">behavior</a>                                                     | <a href="#">RT</a> |  | 17    | 1.0E0   | 1.0E0     |
| <input type="checkbox"/> | GOTERM_BP_ALL          | <a href="#">inflammatory response</a>                                        | <a href="#">RT</a> |  | 9     | 1.0E0   | 1.0E0     |
| <input type="checkbox"/> | GOTERM_BP_ALL          | <a href="#">response to wounding</a>                                         | <a href="#">RT</a> |  | 10    | 1.0E0   | 1.0E0     |
| <input type="checkbox"/> | GOTERM_BP_ALL          | <a href="#">response to external stimulus</a>                                | <a href="#">RT</a> |  | 17    | 1.0E0   | 1.0E0     |
| <input type="checkbox"/> | GOTERM_BP_ALL          | <a href="#">defense response</a>                                             | <a href="#">RT</a> |  | 15    | 1.0E0   | 1.0E0     |
|                          | Annotation Cluster 212 | Enrichment Score: 0.08                                                       | <b>G</b>           |  | Count | P_Value | Benjamini |
| <input type="checkbox"/> | GOTERM_BP_ALL          | <a href="#">hexose metabolic process</a>                                     | <a href="#">RT</a> |  | 14    | 6.2E-1  | 1.0E0     |
| <input type="checkbox"/> | GOTERM_BP_ALL          | <a href="#">monosaccharide metabolic process</a>                             | <a href="#">RT</a> |  | 14    | 6.4E-1  | 1.0E0     |
| <input type="checkbox"/> | GOTERM_BP_ALL          | <a href="#">alcohol catabolic process</a>                                    | <a href="#">RT</a> |  | 6     | 7.3E-1  | 1.0E0     |
| <input type="checkbox"/> | GOTERM_BP_ALL          | <a href="#">glycolysis</a>                                                   | <a href="#">RT</a> |  | 5     | 7.5E-1  | 1.0E0     |
| <input type="checkbox"/> | GOTERM_BP_ALL          | <a href="#">glucose metabolic process</a>                                    | <a href="#">RT</a> |  | 9     | 8.1E-1  | 1.0E0     |
| <input type="checkbox"/> | GOTERM_BP_ALL          | <a href="#">glucose catabolic process</a>                                    | <a href="#">RT</a> |  | 5     | 8.4E-1  | 1.0E0     |
| <input type="checkbox"/> | GOTERM_BP_ALL          | <a href="#">monosaccharide catabolic process</a>                             | <a href="#">RT</a> |  | 5     | 8.5E-1  | 1.0E0     |
| <input type="checkbox"/> | GOTERM_BP_ALL          | <a href="#">hexose catabolic process</a>                                     | <a href="#">RT</a> |  | 5     | 8.5E-1  | 1.0E0     |
| <input type="checkbox"/> | SP_PIR_KEYWORDS        | <a href="#">glycolysis</a>                                                   | <a href="#">RT</a> |  | 3     | 9.1E-1  | 1.0E0     |
| <input type="checkbox"/> | GOTERM_BP_ALL          | <a href="#">cellular carbohydrate catabolic process</a>                      | <a href="#">RT</a> |  | 5     | 9.3E-1  | 1.0E0     |
| <input type="checkbox"/> | GOTERM_BP_ALL          | <a href="#">cellular carbohydrate metabolic process</a>                      | <a href="#">RT</a> |  | 20    | 9.4E-1  | 1.0E0     |
| <input type="checkbox"/> | GOTERM_BP_ALL          | <a href="#">carbohydrate catabolic process</a>                               | <a href="#">RT</a> |  | 5     | 9.5E-1  | 1.0E0     |
| <input type="checkbox"/> | GOTERM_BP_ALL          | <a href="#">carbohydrate metabolic process</a>                               | <a href="#">RT</a> |  | 29    | 9.7E-1  | 1.0E0     |
| <input type="checkbox"/> | KEGG_PATHWAY           | <a href="#">Glycolysis / Gluconeogenesis</a>                                 | <a href="#">RT</a> |  | 3     | 9.8E-1  | 1.0E0     |
|                          | Annotation Cluster 213 | Enrichment Score: 0.08                                                       | <b>G</b>           |  | Count | P_Value | Benjamini |
| <input type="checkbox"/> | SP_PIR_KEYWORDS        | <a href="#">glycosidase</a>                                                  | <a href="#">RT</a> |  | 5     | 7.8E-1  | 1.0E0     |
| <input type="checkbox"/> | GOTERM_MF_ALL          | <a href="#">hydrolase activity, acting on glycosyl bonds</a>                 | <a href="#">RT</a> |  | 9     | 8.1E-1  | 1.0E0     |
| <input type="checkbox"/> | GOTERM_MF_ALL          | <a href="#">hydrolase activity, hydrolyzing O-glycosyl compounds</a>         | <a href="#">RT</a> |  | 6     | 9.3E-1  | 1.0E0     |
|                          | Annotation Cluster 214 | Enrichment Score: 0.07                                                       | <b>G</b>           |  | Count | P_Value | Benjamini |
| <input type="checkbox"/> | GOTERM_BP_ALL          | <a href="#">regulation of cellular component organization and biogenesis</a> | <a href="#">RT</a> |  | 8     | 4.9E-1  | 1.0E0     |
| <input type="checkbox"/> | GOTERM_BP_ALL          | <a href="#">regulation of actin polymerization and/or depolymerization</a>   | <a href="#">RT</a> |  | 3     | 8.9E-1  | 1.0E0     |



|                          |                 |                                                                              |    |  |       |         |           |
|--------------------------|-----------------|------------------------------------------------------------------------------|----|--|-------|---------|-----------|
| <input type="checkbox"/> | GOTERM_BP_ALL   | <a href="#">regulation of actin filament length</a>                          | RT |  | 3     | 9.0E-1  | 1.0E0     |
| <input type="checkbox"/> | GOTERM_BP_ALL   | <a href="#">regulation of actin cytoskeleton organization and biogenesis</a> | RT |  | 3     | 9.0E-1  | 1.0E0     |
| <input type="checkbox"/> | GOTERM_BP_ALL   | <a href="#">regulation of cellular component size</a>                        | RT |  | 3     | 9.1E-1  | 1.0E0     |
| <input type="checkbox"/> | GOTERM_BP_ALL   | <a href="#">regulation of cytoskeleton organization and biogenesis</a>       | RT |  | 3     | 9.3E-1  | 1.0E0     |
| <input type="checkbox"/> | GOTERM_BP_ALL   | <a href="#">regulation of organelle organization and biogenesis</a>          | RT |  | 3     | 9.3E-1  | 1.0E0     |
| <input type="checkbox"/> | GOTERM_BP_ALL   | <a href="#">actin polymerization and/or depolymerization</a>                 | RT |  | 3     | 9.5E-1  | 1.0E0     |
| Annotation Cluster 215   |                 | Enrichment Score: 0.07                                                       | G  |  | Count | P_Value | Benjamini |
| <input type="checkbox"/> | SP_PIR_KEYWORDS | <a href="#">electron transport</a>                                           | RT |  | 5     | 5.2E-1  | 9.9E-1    |
| <input type="checkbox"/> | GOTERM_MF_ALL   | <a href="#">tetrapyrrole binding</a>                                         | RT |  | 6     | 1.0E0   | 1.0E0     |
| <input type="checkbox"/> | GOTERM_MF_ALL   | <a href="#">heme binding</a>                                                 | RT |  | 6     | 1.0E0   | 1.0E0     |
| <input type="checkbox"/> | SP_PIR_KEYWORDS | <a href="#">heme</a>                                                         | RT |  | 4     | 1.0E0   | 1.0E0     |
| Annotation Cluster 216   |                 | Enrichment Score: 0.06                                                       | G  |  | Count | P_Value | Benjamini |
| <input type="checkbox"/> | GOTERM_BP_ALL   | <a href="#">ER to Golgi vesicle-mediated transport</a>                       | RT |  | 6     | 6.2E-1  | 1.0E0     |
| <input type="checkbox"/> | GOTERM_BP_ALL   | <a href="#">Golgi vesicle transport</a>                                      | RT |  | 7     | 8.2E-1  | 1.0E0     |
| <input type="checkbox"/> | SP_PIR_KEYWORDS | <a href="#">er-golgi transport</a>                                           | RT |  | 5     | 8.3E-1  | 1.0E0     |
| <input type="checkbox"/> | GOTERM_BP_ALL   | <a href="#">secretion by cell</a>                                            | RT |  | 15    | 1.0E0   | 1.0E0     |
| <input type="checkbox"/> | GOTERM_BP_ALL   | <a href="#">secretory pathway</a>                                            | RT |  | 11    | 1.0E0   | 1.0E0     |
| <input type="checkbox"/> | GOTERM_BP_ALL   | <a href="#">secretion</a>                                                    | RT |  | 16    | 1.0E0   | 1.0E0     |
| Annotation Cluster 217   |                 | Enrichment Score: 0.06                                                       | G  |  | Count | P_Value | Benjamini |
| <input type="checkbox"/> | GOTERM_BP_ALL   | <a href="#">carbohydrate transport</a>                                       | RT |  | 6     | 7.9E-1  | 1.0E0     |
| <input type="checkbox"/> | GOTERM_MF_ALL   | <a href="#">sugar:hydrogen ion symporter activity</a>                        | RT |  | 3     | 9.0E-1  | 1.0E0     |
| <input type="checkbox"/> | GOTERM_MF_ALL   | <a href="#">sugar transmembrane transporter activity</a>                     | RT |  | 3     | 9.1E-1  | 1.0E0     |
| <input type="checkbox"/> | GOTERM_MF_ALL   | <a href="#">carbohydrate transmembrane transporter activity</a>              | RT |  | 3     | 9.1E-1  | 1.0E0     |
| Annotation Cluster 218   |                 | Enrichment Score: 0.06                                                       | G  |  | Count | P_Value | Benjamini |
| <input type="checkbox"/> | GOTERM_BP_ALL   | <a href="#">developmental maturation</a>                                     | RT |  | 8     | 8.6E-1  | 1.0E0     |
| <input type="checkbox"/> | SP_PIR_KEYWORDS | <a href="#">mitogen</a>                                                      | RT |  | 3     | 8.6E-1  | 1.0E0     |
| <input type="checkbox"/> | GOTERM_BP_ALL   | <a href="#">cell maturation</a>                                              | RT |  | 6     | 9.2E-1  | 1.0E0     |
| Annotation Cluster 219   |                 | Enrichment Score: 0.05                                                       | G  |  | Count | P_Value | Benjamini |
| <input type="checkbox"/> | GOTERM_BP_ALL   | <a href="#">patterning of blood vessels</a>                                  | RT |  | 3     | 7.0E-1  | 1.0E0     |
| <input type="checkbox"/> | GOTERM_BP_ALL   | <a href="#">lung development</a>                                             | RT |  | 6     | 7.8E-1  | 1.0E0     |
| <input type="checkbox"/> | GOTERM_BP_ALL   | <a href="#">respiratory tube development</a>                                 | RT |  | 6     | 7.9E-1  | 1.0E0     |
| <input type="checkbox"/> | GOTERM_BP_ALL   | <a href="#">branching morphogenesis of a tube</a>                            | RT |  | 5     | 8.6E-1  | 1.0E0     |
| <input type="checkbox"/> | GOTERM_BP_ALL   | <a href="#">morphogenesis of a branching structure</a>                       | RT |  | 5     | 8.9E-1  | 1.0E0     |
| <input type="checkbox"/> | GOTERM_BP_ALL   | <a href="#">embryonic pattern specification</a>                              | RT |  | 3     | 9.5E-1  | 1.0E0     |
| <input type="checkbox"/> | GOTERM_BP_ALL   | <a href="#">rhythmic process</a>                                             | RT |  | 5     | 9.5E-1  | 1.0E0     |
| <input type="checkbox"/> | GOTERM_BP_ALL   | <a href="#">morphogenesis of an epithelium</a>                               | RT |  | 6     | 9.9E-1  | 1.0E0     |
| <input type="checkbox"/> | GOTERM_BP_ALL   | <a href="#">tube morphogenesis</a>                                           | RT |  | 7     | 1.0E0   | 1.0E0     |
| <input type="checkbox"/> | GOTERM_BP_ALL   | <a href="#">tube development</a>                                             | RT |  | 9     | 1.0E0   | 1.0E0     |
| <input type="checkbox"/> | GOTERM_BP_ALL   | <a href="#">pattern specification process</a>                                | RT |  | 5     | 1.0E0   | 1.0E0     |
| Annotation Cluster 220   |                 | Enrichment Score: 0.05                                                       | G  |  | Count | P_Value | Benjamini |
| <input type="checkbox"/> | SP_PIR_KEYWORDS | <a href="#">angiogenesis</a>                                                 | RT |  | 5     | 5.0E-1  | 9.9E-1    |
| <input type="checkbox"/> | GOTERM_BP_ALL   | <a href="#">angiogenesis</a>                                                 | RT |  | 10    | 9.6E-1  | 1.0E0     |
| <input type="checkbox"/> | GOTERM_BP_ALL   | <a href="#">blood vessel development</a>                                     | RT |  | 14    | 9.9E-1  | 1.0E0     |
| <input type="checkbox"/> | GOTERM_BP_ALL   | <a href="#">vasculature development</a>                                      | RT |  | 14    | 9.9E-1  | 1.0E0     |
| <input type="checkbox"/> | GOTERM_BP_ALL   | <a href="#">blood vessel morphogenesis</a>                                   | RT |  | 11    | 9.9E-1  | 1.0E0     |
| <input type="checkbox"/> | GOTERM_BP_ALL   | <a href="#">anatomical structure formation</a>                               | RT |  | 11    | 1.0E0   | 1.0E0     |
| <input type="checkbox"/> | GOTERM_BP_ALL   | <a href="#">organ morphogenesis</a>                                          | RT |  | 24    | 1.0E0   | 1.0E0     |
| Annotation Cluster 221   |                 | Enrichment Score: 0.05                                                       | G  |  | Count | P_Value | Benjamini |

|                          |                 |                                                                         |    |  |                        |          |        |
|--------------------------|-----------------|-------------------------------------------------------------------------|----|--|------------------------|----------|--------|
| <input type="checkbox"/> | SP_PIR_KEYWORDS | <a href="#">transport</a>                                               | RT |  | 119                    | 4.8E-1   | 9.9E-1 |
| <input type="checkbox"/> | GOTERM_MF_ALL   | <a href="#">inorganic cation transmembrane transporter activity</a>     | RT |  | 14                     | 5.6E-1   | 1.0E0  |
| <input type="checkbox"/> | GOTERM_MF_ALL   | <a href="#">transporter activity</a>                                    | RT |  | 97                     | 9.7E-1   | 1.0E0  |
| <input type="checkbox"/> | GOTERM_MF_ALL   | <a href="#">substrate-specific transporter activity</a>                 | RT |  | 67                     | 9.9E-1   | 1.0E0  |
| <input type="checkbox"/> | GOTERM_MF_ALL   | <a href="#">transmembrane transporter activity</a>                      | RT |  | 56                     | 1.0E0    | 1.0E0  |
| <input type="checkbox"/> | GOTERM_MF_ALL   | <a href="#">substrate-specific transmembrane transporter activity</a>   | RT |  | 43                     | 1.0E0    | 1.0E0  |
| <input type="checkbox"/> | GOTERM_MF_ALL   | <a href="#">cation transmembrane transporter activity</a>               | RT |  | 23                     | 1.0E0    | 1.0E0  |
| <input type="checkbox"/> | GOTERM_BP_ALL   | <a href="#">monovalent inorganic cation transport</a>                   | RT |  | 12                     | 1.0E0    | 1.0E0  |
| <input type="checkbox"/> | SP_PIR_KEYWORDS | <a href="#">ion transport</a>                                           | RT |  | 19                     | 1.0E0    | 1.0E0  |
| <input type="checkbox"/> | GOTERM_BP_ALL   | <a href="#">cation transport</a>                                        | RT |  | 22                     | 1.0E0    | 1.0E0  |
| <input type="checkbox"/> | GOTERM_MF_ALL   | <a href="#">ion transmembrane transporter activity</a>                  | RT |  | 29                     | 1.0E0    | 1.0E0  |
| <input type="checkbox"/> | GOTERM_BP_ALL   | <a href="#">metal ion transport</a>                                     | RT |  | 15                     | 1.0E0    | 1.0E0  |
| <input type="checkbox"/> | GOTERM_BP_ALL   | <a href="#">ion transport</a>                                           | RT |  | 31                     | 1.0E0    | 1.0E0  |
| Annotation Cluster 222   |                 |                                                                         |    |  | Enrichment Score: 0.04 | <b>G</b> |        |
| <input type="checkbox"/> | SMART           | <a href="#">Kelch</a>                                                   | RT |  | 3                      | 9.0E-1   | 1.0E0  |
| <input type="checkbox"/> | INTERPRO        | <a href="#">Kelch repeat type 1</a>                                     | RT |  | 3                      | 9.0E-1   | 1.0E0  |
| <input type="checkbox"/> | SP_PIR_KEYWORDS | <a href="#">kelch repeat</a>                                            | RT |  | 3                      | 9.1E-1   | 1.0E0  |
| Annotation Cluster 223   |                 |                                                                         |    |  | Enrichment Score: 0.04 | <b>G</b> |        |
| <input type="checkbox"/> | GOTERM_BP_ALL   | <a href="#">amino acid catabolic process</a>                            | RT |  | 4                      | 8.6E-1   | 1.0E0  |
| <input type="checkbox"/> | GOTERM_BP_ALL   | <a href="#">amine catabolic process</a>                                 | RT |  | 4                      | 9.3E-1   | 1.0E0  |
| <input type="checkbox"/> | GOTERM_BP_ALL   | <a href="#">nitrogen compound catabolic process</a>                     | RT |  | 4                      | 9.3E-1   | 1.0E0  |
| Annotation Cluster 224   |                 |                                                                         |    |  | Enrichment Score: 0.04 | <b>G</b> |        |
| <input type="checkbox"/> | SP_PIR_KEYWORDS | <a href="#">guanine-nucleotide releasing factor</a>                     | RT |  | 7                      | 6.8E-1   | 1.0E0  |
| <input type="checkbox"/> | GOTERM_MF_ALL   | <a href="#">Ras guanyl-nucleotide exchange factor activity</a>          | RT |  | 7                      | 7.4E-1   | 1.0E0  |
| <input type="checkbox"/> | UP_SEQ_FEATURE  | domain:DH                                                               | RT |  | 3                      | 7.8E-1   | 1.0E0  |
| <input type="checkbox"/> | INTERPRO        | <a href="#">Guanine-nucleotide dissociation stimulator, CDC24</a>       | RT |  | 3                      | 8.1E-1   | 1.0E0  |
| <input type="checkbox"/> | UP_SEQ_FEATURE  | domain:PH                                                               | RT |  | 8                      | 8.9E-1   | 1.0E0  |
| <input type="checkbox"/> | GOTERM_MF_ALL   | <a href="#">guanyl-nucleotide exchange factor activity</a>              | RT |  | 10                     | 9.0E-1   | 1.0E0  |
| <input type="checkbox"/> | SMART           | <a href="#">RhoGEF</a>                                                  | RT |  | 3                      | 9.0E-1   | 1.0E0  |
| <input type="checkbox"/> | GOTERM_MF_ALL   | <a href="#">Rho guanyl-nucleotide exchange factor activity</a>          | RT |  | 4                      | 9.5E-1   | 1.0E0  |
| <input type="checkbox"/> | INTERPRO        | <a href="#">DH</a>                                                      | RT |  | 3                      | 9.6E-1   | 1.0E0  |
| <input type="checkbox"/> | GOTERM_MF_ALL   | <a href="#">small GTPase regulator activity</a>                         | RT |  | 12                     | 9.7E-1   | 1.0E0  |
| <input type="checkbox"/> | GOTERM_BP_ALL   | <a href="#">regulation of Ras protein signal transduction</a>           | RT |  | 8                      | 9.8E-1   | 1.0E0  |
| <input type="checkbox"/> | GOTERM_BP_ALL   | <a href="#">Rho protein signal transduction</a>                         | RT |  | 5                      | 9.8E-1   | 1.0E0  |
| <input type="checkbox"/> | GOTERM_MF_ALL   | <a href="#">GTPase regulator activity</a>                               | RT |  | 20                     | 9.9E-1   | 1.0E0  |
| <input type="checkbox"/> | GOTERM_BP_ALL   | <a href="#">regulation of Rho protein signal transduction</a>           | RT |  | 3                      | 9.9E-1   | 1.0E0  |
| <input type="checkbox"/> | SMART           | <a href="#">PH</a>                                                      | RT |  | 8                      | 9.9E-1   | 1.0E0  |
| <input type="checkbox"/> | GOTERM_BP_ALL   | <a href="#">regulation of small GTPase mediated signal transduction</a> | RT |  | 9                      | 1.0E0    | 1.0E0  |
| <input type="checkbox"/> | INTERPRO        | <a href="#">Pleckstrin-like</a>                                         | RT |  | 8                      | 1.0E0    | 1.0E0  |
| <input type="checkbox"/> | INTERPRO        | <a href="#">Pleckstrin homology-type</a>                                | RT |  | 7                      | 1.0E0    | 1.0E0  |
| Annotation Cluster 225   |                 |                                                                         |    |  | Enrichment Score: 0.04 | <b>G</b> |        |
| <input type="checkbox"/> | GOTERM_BP_ALL   | <a href="#">regulation of programmed cell death</a>                     | RT |  | 39                     | 8.2E-1   | 1.0E0  |
| <input type="checkbox"/> | GOTERM_BP_ALL   | <a href="#">regulation of apoptosis</a>                                 | RT |  | 37                     | 8.7E-1   | 1.0E0  |
| <input type="checkbox"/> | GOTERM_BP_ALL   | <a href="#">positive regulation of apoptosis</a>                        | RT |  | 15                     | 9.2E-1   | 1.0E0  |
| <input type="checkbox"/> | GOTERM_BP_ALL   | <a href="#">positive regulation of programmed cell death</a>            | RT |  | 15                     | 9.3E-1   | 1.0E0  |
| <input type="checkbox"/> | GOTERM_BP_ALL   | <a href="#">induction of programmed cell death</a>                      | RT |  | 10                     | 9.7E-1   | 1.0E0  |
| <input type="checkbox"/> | GOTERM_BP_ALL   | <a href="#">induction of apoptosis</a>                                  | RT |  | 10                     | 9.7E-1   | 1.0E0  |

| Annotation Cluster 226   |                 | Enrichment Score: 0.04                                                 | G  |  | Count | P_Value | Benjamini |
|--------------------------|-----------------|------------------------------------------------------------------------|----|--|-------|---------|-----------|
| <input type="checkbox"/> | GOTERM_MF_ALL   | <a href="#">diacylglycerol binding</a>                                 | RT |  | 4     | 8.5E-1  | 1.0E0     |
| <input type="checkbox"/> | SP_PIR_KEYWORDS | <a href="#">Phorbol-ester binding</a>                                  | RT |  | 3     | 9.1E-1  | 1.0E0     |
| <input type="checkbox"/> | SMART           | <a href="#">C1</a>                                                     | RT |  | 3     | 9.2E-1  | 1.0E0     |
| <input type="checkbox"/> | INTERPRO        | <a href="#">Protein kinase C, phorbol ester/diacylglycerol binding</a> | RT |  | 3     | 9.7E-1  | 1.0E0     |
| Annotation Cluster 227   |                 | Enrichment Score: 0.04                                                 | G  |  | Count | P_Value | Benjamini |
| <input type="checkbox"/> | GOTERM_BP_ALL   | <a href="#">regulation of kinase activity</a>                          | RT |  | 15    | 7.5E-1  | 1.0E0     |
| <input type="checkbox"/> | GOTERM_BP_ALL   | <a href="#">regulation of transferase activity</a>                     | RT |  | 15    | 7.9E-1  | 1.0E0     |
| <input type="checkbox"/> | GOTERM_BP_ALL   | <a href="#">positive regulation of kinase activity</a>                 | RT |  | 5     | 9.9E-1  | 1.0E0     |
| <input type="checkbox"/> | GOTERM_BP_ALL   | <a href="#">positive regulation of transferase activity</a>            | RT |  | 5     | 1.0E0   | 1.0E0     |
| <input type="checkbox"/> | GOTERM_BP_ALL   | <a href="#">positive regulation of catalytic activity</a>              | RT |  | 8     | 1.0E0   | 1.0E0     |
| <input type="checkbox"/> | GOTERM_BP_ALL   | <a href="#">positive regulation of protein kinase activity</a>         | RT |  | 3     | 1.0E0   | 1.0E0     |
| Annotation Cluster 228   |                 | Enrichment Score: 0.04                                                 | G  |  | Count | P_Value | Benjamini |
| <input type="checkbox"/> | SP_PIR_KEYWORDS | <a href="#">heparin-binding</a>                                        | RT |  | 5     | 7.7E-1  | 1.0E0     |
| <input type="checkbox"/> | GOTERM_MF_ALL   | <a href="#">heparin binding</a>                                        | RT |  | 5     | 8.8E-1  | 1.0E0     |
| <input type="checkbox"/> | GOTERM_MF_ALL   | <a href="#">glycosaminoglycan binding</a>                              | RT |  | 6     | 9.1E-1  | 1.0E0     |
| <input type="checkbox"/> | GOTERM_MF_ALL   | <a href="#">polysaccharide binding</a>                                 | RT |  | 6     | 9.4E-1  | 1.0E0     |
| <input type="checkbox"/> | GOTERM_MF_ALL   | <a href="#">pattern binding</a>                                        | RT |  | 6     | 9.6E-1  | 1.0E0     |
| <input type="checkbox"/> | SP_PIR_KEYWORDS | <a href="#">growth factor</a>                                          | RT |  | 5     | 1.0E0   | 1.0E0     |
| <input type="checkbox"/> | GOTERM_MF_ALL   | <a href="#">carbohydrate binding</a>                                   | RT |  | 15    | 1.0E0   | 1.0E0     |
| Annotation Cluster 229   |                 | Enrichment Score: 0.03                                                 | G  |  | Count | P_Value | Benjamini |
| <input type="checkbox"/> | GOTERM_CC_ALL   | <a href="#">heterotrimeric G-protein complex</a>                       | RT |  | 3     | 8.6E-1  | 1.0E0     |
| <input type="checkbox"/> | GOTERM_CC_ALL   | <a href="#">extrinsic to plasma membrane</a>                           | RT |  | 4     | 9.0E-1  | 1.0E0     |
| <input type="checkbox"/> | GOTERM_CC_ALL   | <a href="#">extrinsic to membrane</a>                                  | RT |  | 4     | 9.7E-1  | 1.0E0     |
| <input type="checkbox"/> | GOTERM_BP_ALL   | <a href="#">second-messenger-mediated signaling</a>                    | RT |  | 5     | 1.0E0   | 1.0E0     |
| Annotation Cluster 230   |                 | Enrichment Score: 0.03                                                 | G  |  | Count | P_Value | Benjamini |
| <input type="checkbox"/> | SMART           | <a href="#">BRLZ</a>                                                   | RT |  | 3     | 8.8E-1  | 1.0E0     |
| <input type="checkbox"/> | INTERPRO        | <a href="#">Basic-leucine zipper (bZIP) transcription factor</a>       | RT |  | 3     | 9.4E-1  | 1.0E0     |
| <input type="checkbox"/> | UP_SEQ_FEATURE  | DNA-binding region:Basic motif                                         | RT |  | 6     | 9.9E-1  | 1.0E0     |
| Annotation Cluster 231   |                 | Enrichment Score: 0.03                                                 | G  |  | Count | P_Value | Benjamini |
| <input type="checkbox"/> | GOTERM_MF_ALL   | <a href="#">actin binding</a>                                          | RT |  | 20    | 8.9E-1  | 1.0E0     |
| <input type="checkbox"/> | GOTERM_MF_ALL   | <a href="#">cytoskeletal protein binding</a>                           | RT |  | 28    | 9.3E-1  | 1.0E0     |
| <input type="checkbox"/> | SP_PIR_KEYWORDS | <a href="#">actin-binding</a>                                          | RT |  | 12    | 9.3E-1  | 1.0E0     |
| <input type="checkbox"/> | SP_PIR_KEYWORDS | <a href="#">cytoskeleton</a>                                           | RT |  | 19    | 9.9E-1  | 1.0E0     |
| Annotation Cluster 232   |                 | Enrichment Score: 0.03                                                 | G  |  | Count | P_Value | Benjamini |
| <input type="checkbox"/> | SP_PIR_KEYWORDS | <a href="#">lysosome</a>                                               | RT |  | 8     | 9.2E-1  | 1.0E0     |
| <input type="checkbox"/> | GOTERM_CC_ALL   | <a href="#">vacuole</a>                                                | RT |  | 14    | 9.3E-1  | 1.0E0     |
| <input type="checkbox"/> | GOTERM_CC_ALL   | <a href="#">lytic vacuole</a>                                          | RT |  | 12    | 9.4E-1  | 1.0E0     |
| <input type="checkbox"/> | GOTERM_CC_ALL   | <a href="#">lysosome</a>                                               | RT |  | 12    | 9.4E-1  | 1.0E0     |
| Annotation Cluster 233   |                 | Enrichment Score: 0.03                                                 | G  |  | Count | P_Value | Benjamini |
| <input type="checkbox"/> | SMART           | <a href="#">HLH</a>                                                    | RT |  | 6     | 8.5E-1  | 1.0E0     |
| <input type="checkbox"/> | INTERPRO        | <a href="#">Helix-loop-helix DNA-binding</a>                           | RT |  | 5     | 9.2E-1  | 1.0E0     |
| <input type="checkbox"/> | INTERPRO        | <a href="#">Basic helix-loop-helix dimerisation region bHLH</a>        | RT |  | 6     | 9.4E-1  | 1.0E0     |
| <input type="checkbox"/> | UP_SEQ_FEATURE  | domain:Helix-loop-helix motif                                          | RT |  | 4     | 9.9E-1  | 1.0E0     |
| <input type="checkbox"/> | UP_SEQ_FEATURE  | DNA-binding region:Basic motif                                         | RT |  | 6     | 9.9E-1  | 1.0E0     |
| Annotation Cluster 234   |                 | Enrichment Score: 0.03                                                 | G  |  | Count | P_Value | Benjamini |
| <input type="checkbox"/> | GOTERM_BP_ALL   | <a href="#">actin filament organization</a>                            | RT |  | 4     | 8.6E-1  | 1.0E0     |
| <input type="checkbox"/> | GOTERM_BP_ALL   | <a href="#">actin filament-based process</a>                           | RT |  | 12    | 9.8E-1  | 1.0E0     |
| <input type="checkbox"/> | GOTERM_BP_ALL   | <a href="#">actin cytoskeleton organization and</a>                    | RT |  | 11    | 9.9E-1  | 1.0E0     |

|                          |                 |                                                                                                              |           |  | Count | P_Value | Benjamini |
|--------------------------|-----------------|--------------------------------------------------------------------------------------------------------------|-----------|--|-------|---------|-----------|
| Annotation Cluster 235   |                 | Enrichment Score: 0.03                                                                                       | <b>G</b>  |  |       |         |           |
| <input type="checkbox"/> | GOTERM_BP_ALL   | <a href="#">biogenesis</a>                                                                                   | <b>RT</b> |  | 11    | 9.9E-1  | 1.0E0     |
| <input type="checkbox"/> | GOTERM_BP_ALL   | <a href="#">positive regulation of nucleobase, nucleoside, nucleotide and nucleic acid metabolic process</a> | <b>RT</b> |  | 28    | 8.8E-1  | 1.0E0     |
| <input type="checkbox"/> | GOTERM_BP_ALL   | <a href="#">positive regulation of transcription</a>                                                         | <b>RT</b> |  | 27    | 8.9E-1  | 1.0E0     |
| <input type="checkbox"/> | GOTERM_BP_ALL   | <a href="#">positive regulation of metabolic process</a>                                                     | <b>RT</b> |  | 36    | 9.2E-1  | 1.0E0     |
| <input type="checkbox"/> | GOTERM_BP_ALL   | <a href="#">positive regulation of biological process</a>                                                    | <b>RT</b> |  | 83    | 9.4E-1  | 1.0E0     |
| <input type="checkbox"/> | GOTERM_BP_ALL   | <a href="#">positive regulation of cellular process</a>                                                      | <b>RT</b> |  | 72    | 9.5E-1  | 1.0E0     |
| <input type="checkbox"/> | GOTERM_BP_ALL   | <a href="#">positive regulation of transcription, DNA-dependent</a>                                          | <b>RT</b> |  | 19    | 9.8E-1  | 1.0E0     |
| <input type="checkbox"/> | GOTERM_BP_ALL   | <a href="#">positive regulation of cellular metabolic process</a>                                            | <b>RT</b> |  | 30    | 9.8E-1  | 1.0E0     |
| <input type="checkbox"/> | GOTERM_BP_ALL   | <a href="#">positive regulation of transcription from RNA polymerase II promoter</a>                         | <b>RT</b> |  | 11    | 1.0E0   | 1.0E0     |
| Annotation Cluster 236   |                 | Enrichment Score: 0.02                                                                                       | <b>G</b>  |  |       |         |           |
| <input type="checkbox"/> | GOTERM_BP_ALL   | <a href="#">dendrite morphogenesis</a>                                                                       | <b>RT</b> |  | 3     | 4.4E-1  | 1.0E0     |
| <input type="checkbox"/> | GOTERM_BP_ALL   | <a href="#">dendrite development</a>                                                                         | <b>RT</b> |  | 3     | 9.0E-1  | 1.0E0     |
| <input type="checkbox"/> | GOTERM_BP_ALL   | <a href="#">regulation of neurogenesis</a>                                                                   | <b>RT</b> |  | 3     | 9.6E-1  | 1.0E0     |
| <input type="checkbox"/> | SP_PIR_KEYWORDS | <a href="#">neurogenesis</a>                                                                                 | <b>RT</b> |  | 5     | 9.8E-1  | 1.0E0     |
| <input type="checkbox"/> | GOTERM_BP_ALL   | <a href="#">cellular morphogenesis during differentiation</a>                                                | <b>RT</b> |  | 11    | 9.9E-1  | 1.0E0     |
| <input type="checkbox"/> | GOTERM_BP_ALL   | <a href="#">neurite morphogenesis</a>                                                                        | <b>RT</b> |  | 7     | 1.0E0   | 1.0E0     |
| <input type="checkbox"/> | GOTERM_BP_ALL   | <a href="#">neuron morphogenesis during differentiation</a>                                                  | <b>RT</b> |  | 7     | 1.0E0   | 1.0E0     |
| <input type="checkbox"/> | GOTERM_BP_ALL   | <a href="#">cell part morphogenesis</a>                                                                      | <b>RT</b> |  | 13    | 1.0E0   | 1.0E0     |
| <input type="checkbox"/> | GOTERM_BP_ALL   | <a href="#">cell projection organization and biogenesis</a>                                                  | <b>RT</b> |  | 13    | 1.0E0   | 1.0E0     |
| <input type="checkbox"/> | GOTERM_BP_ALL   | <a href="#">cell projection morphogenesis</a>                                                                | <b>RT</b> |  | 13    | 1.0E0   | 1.0E0     |
| <input type="checkbox"/> | GOTERM_BP_ALL   | <a href="#">neurite development</a>                                                                          | <b>RT</b> |  | 8     | 1.0E0   | 1.0E0     |
| <input type="checkbox"/> | GOTERM_BP_ALL   | <a href="#">neuron development</a>                                                                           | <b>RT</b> |  | 8     | 1.0E0   | 1.0E0     |
| <input type="checkbox"/> | GOTERM_BP_ALL   | <a href="#">cell morphogenesis</a>                                                                           | <b>RT</b> |  | 25    | 1.0E0   | 1.0E0     |
| <input type="checkbox"/> | GOTERM_BP_ALL   | <a href="#">cellular structure morphogenesis</a>                                                             | <b>RT</b> |  | 25    | 1.0E0   | 1.0E0     |
| <input type="checkbox"/> | GOTERM_BP_ALL   | <a href="#">axonogenesis</a>                                                                                 | <b>RT</b> |  | 4     | 1.0E0   | 1.0E0     |
| <input type="checkbox"/> | GOTERM_BP_ALL   | <a href="#">neurogenesis</a>                                                                                 | <b>RT</b> |  | 13    | 1.0E0   | 1.0E0     |
| <input type="checkbox"/> | GOTERM_BP_ALL   | <a href="#">neuron differentiation</a>                                                                       | <b>RT</b> |  | 9     | 1.0E0   | 1.0E0     |
| <input type="checkbox"/> | GOTERM_BP_ALL   | <a href="#">generation of neurons</a>                                                                        | <b>RT</b> |  | 10    | 1.0E0   | 1.0E0     |
| <input type="checkbox"/> | GOTERM_BP_ALL   | <a href="#">nervous system development</a>                                                                   | <b>RT</b> |  | 26    | 1.0E0   | 1.0E0     |
| Annotation Cluster 237   |                 | Enrichment Score: 0.02                                                                                       | <b>G</b>  |  |       |         |           |
| <input type="checkbox"/> | GOTERM_BP_ALL   | <a href="#">cellular calcium ion homeostasis</a>                                                             | <b>RT</b> |  | 5     | 8.9E-1  | 1.0E0     |
| <input type="checkbox"/> | GOTERM_BP_ALL   | <a href="#">calcium ion homeostasis</a>                                                                      | <b>RT</b> |  | 5     | 9.0E-1  | 1.0E0     |
| <input type="checkbox"/> | GOTERM_BP_ALL   | <a href="#">cellular homeostasis</a>                                                                         | <b>RT</b> |  | 19    | 9.0E-1  | 1.0E0     |
| <input type="checkbox"/> | GOTERM_BP_ALL   | <a href="#">cellular di-, tri-valent inorganic cation homeostasis</a>                                        | <b>RT</b> |  | 7     | 9.3E-1  | 1.0E0     |
| <input type="checkbox"/> | GOTERM_BP_ALL   | <a href="#">cellular metal ion homeostasis</a>                                                               | <b>RT</b> |  | 5     | 9.3E-1  | 1.0E0     |
| <input type="checkbox"/> | GOTERM_BP_ALL   | <a href="#">di-, tri-valent inorganic cation homeostasis</a>                                                 | <b>RT</b> |  | 7     | 9.4E-1  | 1.0E0     |
| <input type="checkbox"/> | GOTERM_BP_ALL   | <a href="#">metal ion homeostasis</a>                                                                        | <b>RT</b> |  | 5     | 9.4E-1  | 1.0E0     |
| <input type="checkbox"/> | GOTERM_BP_ALL   | <a href="#">cellular cation homeostasis</a>                                                                  | <b>RT</b> |  | 7     | 9.7E-1  | 1.0E0     |
| <input type="checkbox"/> | GOTERM_BP_ALL   | <a href="#">cation homeostasis</a>                                                                           | <b>RT</b> |  | 7     | 9.7E-1  | 1.0E0     |
| <input type="checkbox"/> | GOTERM_BP_ALL   | <a href="#">cellular chemical homeostasis</a>                                                                | <b>RT</b> |  | 7     | 1.0E0   | 1.0E0     |
| <input type="checkbox"/> | GOTERM_BP_ALL   | <a href="#">cellular ion homeostasis</a>                                                                     | <b>RT</b> |  | 7     | 1.0E0   | 1.0E0     |
| <input type="checkbox"/> | GOTERM_BP_ALL   | <a href="#">ion homeostasis</a>                                                                              | <b>RT</b> |  | 7     | 1.0E0   | 1.0E0     |
| <input type="checkbox"/> | GOTERM_BP_ALL   | <a href="#">chemical homeostasis</a>                                                                         | <b>RT</b> |  | 8     | 1.0E0   | 1.0E0     |
| Annotation Cluster 238   |                 | Enrichment Score: 0.02                                                                                       | <b>G</b>  |  |       |         |           |
| <input type="checkbox"/> | GOTERM_BP_ALL   | <a href="#">myeloid cell differentiation</a>                                                                 | <b>RT</b> |  | 9     | 8.2E-1  | 1.0E0     |

| <input type="checkbox"/> | GOTERM_BP_ALL          | <a href="#">hemopoiesis</a>                                       | <a href="#">RT</a> |  |  |  |  | 16    | 9.7E-1  | 1.0E0     |
|--------------------------|------------------------|-------------------------------------------------------------------|--------------------|--|--|--|--|-------|---------|-----------|
| <input type="checkbox"/> | GOTERM_BP_ALL          | <a href="#">immune system development</a>                         | <a href="#">RT</a> |  |  |  |  | 19    | 9.7E-1  | 1.0E0     |
| <input type="checkbox"/> | GOTERM_BP_ALL          | <a href="#">leukocyte differentiation</a>                         | <a href="#">RT</a> |  |  |  |  | 9     | 9.7E-1  | 1.0E0     |
| <input type="checkbox"/> | GOTERM_BP_ALL          | <a href="#">hemopoietic or lymphoid organ development</a>         | <a href="#">RT</a> |  |  |  |  | 16    | 9.9E-1  | 1.0E0     |
| <input type="checkbox"/> | GOTERM_BP_ALL          | <a href="#">immune system process</a>                             | <a href="#">RT</a> |  |  |  |  | 43    | 1.0E0   | 1.0E0     |
|                          | Annotation Cluster 239 | Enrichment Score: 0.02                                            | <b>G</b>           |  |  |  |  | Count | P_Value | Benjamini |
| <input type="checkbox"/> | GOTERM_BP_ALL          | <a href="#">regulation of cell shape</a>                          | <a href="#">RT</a> |  |  |  |  | 3     | 9.5E-1  | 1.0E0     |
| <input type="checkbox"/> | GOTERM_BP_ALL          | <a href="#">regulation of anatomical structure morphogenesis</a>  | <a href="#">RT</a> |  |  |  |  | 3     | 9.5E-1  | 1.0E0     |
| <input type="checkbox"/> | GOTERM_BP_ALL          | <a href="#">regulation of cell morphogenesis</a>                  | <a href="#">RT</a> |  |  |  |  | 3     | 9.5E-1  | 1.0E0     |
|                          | Annotation Cluster 240 | Enrichment Score: 0.01                                            | <b>G</b>           |  |  |  |  | Count | P_Value | Benjamini |
| <input type="checkbox"/> | GOTERM_BP_ALL          | <a href="#">JNK cascade</a>                                       | <a href="#">RT</a> |  |  |  |  | 3     | 9.5E-1  | 1.0E0     |
| <input type="checkbox"/> | GOTERM_BP_ALL          | <a href="#">stress-activated protein kinase signaling pathway</a> | <a href="#">RT</a> |  |  |  |  | 3     | 9.6E-1  | 1.0E0     |
| <input type="checkbox"/> | GOTERM_BP_ALL          | <a href="#">MAPKKK cascade</a>                                    | <a href="#">RT</a> |  |  |  |  | 5     | 1.0E0   | 1.0E0     |
|                          | Annotation Cluster 241 | Enrichment Score: 0.01                                            | <b>G</b>           |  |  |  |  | Count | P_Value | Benjamini |
| <input type="checkbox"/> | SMART                  | <a href="#">ANK</a>                                               | <a href="#">RT</a> |  |  |  |  | 10    | 9.3E-1  | 1.0E0     |
| <input type="checkbox"/> | INTERPRO               | <a href="#">Ankyrin</a>                                           | <a href="#">RT</a> |  |  |  |  | 9     | 9.9E-1  | 1.0E0     |
| <input type="checkbox"/> | SP_PIR_KEYWORDS        | <a href="#">ank repeat</a>                                        | <a href="#">RT</a> |  |  |  |  | 6     | 1.0E0   | 1.0E0     |
|                          | Annotation Cluster 242 | Enrichment Score: 0.01                                            | <b>G</b>           |  |  |  |  | Count | P_Value | Benjamini |
| <input type="checkbox"/> | SMART                  | <a href="#">EFh</a>                                               | <a href="#">RT</a> |  |  |  |  | 11    | 8.4E-1  | 1.0E0     |
| <input type="checkbox"/> | INTERPRO               | <a href="#">Calcium-binding EF-hand</a>                           | <a href="#">RT</a> |  |  |  |  | 11    | 9.6E-1  | 1.0E0     |
| <input type="checkbox"/> | UP_SEQ_FEATURE         | domain:EF-hand 1                                                  | <a href="#">RT</a> |  |  |  |  | 5     | 9.9E-1  | 1.0E0     |
| <input type="checkbox"/> | UP_SEQ_FEATURE         | domain:EF-hand 2                                                  | <a href="#">RT</a> |  |  |  |  | 5     | 9.9E-1  | 1.0E0     |
| <input type="checkbox"/> | UP_SEQ_FEATURE         | calcium-binding region:2                                          | <a href="#">RT</a> |  |  |  |  | 3     | 1.0E0   | 1.0E0     |
| <input type="checkbox"/> | UP_SEQ_FEATURE         | calcium-binding region:1                                          | <a href="#">RT</a> |  |  |  |  | 3     | 1.0E0   | 1.0E0     |
| <input type="checkbox"/> | INTERPRO               | <a href="#">EF-Hand type</a>                                      | <a href="#">RT</a> |  |  |  |  | 6     | 1.0E0   | 1.0E0     |
| <input type="checkbox"/> | SP_PIR_KEYWORDS        | <a href="#">calcium</a>                                           | <a href="#">RT</a> |  |  |  |  | 18    | 1.0E0   | 1.0E0     |
| <input type="checkbox"/> | GOTERM_MF_ALL          | <a href="#">calcium ion binding</a>                               | <a href="#">RT</a> |  |  |  |  | 23    | 1.0E0   | 1.0E0     |
|                          | Annotation Cluster 243 | Enrichment Score: 0.01                                            | <b>G</b>           |  |  |  |  | Count | P_Value | Benjamini |
| <input type="checkbox"/> | UP_SEQ_FEATURE         | repeat:LRR 3                                                      | <a href="#">RT</a> |  |  |  |  | 6     | 9.7E-1  | 1.0E0     |
| <input type="checkbox"/> | UP_SEQ_FEATURE         | repeat:LRR 6                                                      | <a href="#">RT</a> |  |  |  |  | 4     | 9.7E-1  | 1.0E0     |
| <input type="checkbox"/> | UP_SEQ_FEATURE         | repeat:LRR 1                                                      | <a href="#">RT</a> |  |  |  |  | 6     | 9.8E-1  | 1.0E0     |
| <input type="checkbox"/> | UP_SEQ_FEATURE         | repeat:LRR 2                                                      | <a href="#">RT</a> |  |  |  |  | 6     | 9.8E-1  | 1.0E0     |
| <input type="checkbox"/> | UP_SEQ_FEATURE         | repeat:LRR 4                                                      | <a href="#">RT</a> |  |  |  |  | 5     | 9.8E-1  | 1.0E0     |
| <input type="checkbox"/> | UP_SEQ_FEATURE         | repeat:LRR 5                                                      | <a href="#">RT</a> |  |  |  |  | 4     | 9.8E-1  | 1.0E0     |
| <input type="checkbox"/> | INTERPRO               | <a href="#">Leucine-rich repeat</a>                               | <a href="#">RT</a> |  |  |  |  | 9     | 1.0E0   | 1.0E0     |
| <input type="checkbox"/> | SP_PIR_KEYWORDS        | <a href="#">leucine-rich repeat</a>                               | <a href="#">RT</a> |  |  |  |  | 8     | 1.0E0   | 1.0E0     |
|                          | Annotation Cluster 244 | Enrichment Score: 0.01                                            | <b>G</b>           |  |  |  |  | Count | P_Value | Benjamini |
| <input type="checkbox"/> | GOTERM_CC_ALL          | <a href="#">microsome</a>                                         | <a href="#">RT</a> |  |  |  |  | 10    | 9.5E-1  | 1.0E0     |
| <input type="checkbox"/> | GOTERM_CC_ALL          | <a href="#">vesicular fraction</a>                                | <a href="#">RT</a> |  |  |  |  | 10    | 9.6E-1  | 1.0E0     |
| <input type="checkbox"/> | SP_PIR_KEYWORDS        | <a href="#">microsome</a>                                         | <a href="#">RT</a> |  |  |  |  | 4     | 9.9E-1  | 1.0E0     |
| <input type="checkbox"/> | GOTERM_CC_ALL          | <a href="#">membrane fraction</a>                                 | <a href="#">RT</a> |  |  |  |  | 22    | 1.0E0   | 1.0E0     |
| <input type="checkbox"/> | GOTERM_CC_ALL          | <a href="#">cell fraction</a>                                     | <a href="#">RT</a> |  |  |  |  | 25    | 1.0E0   | 1.0E0     |
|                          | Annotation Cluster 245 | Enrichment Score: 0.01                                            | <b>G</b>           |  |  |  |  | Count | P_Value | Benjamini |
| <input type="checkbox"/> | GOTERM_BP_ALL          | <a href="#">mononuclear cell proliferation</a>                    | <a href="#">RT</a> |  |  |  |  | 5     | 9.7E-1  | 1.0E0     |
| <input type="checkbox"/> | GOTERM_BP_ALL          | <a href="#">lymphocyte proliferation</a>                          | <a href="#">RT</a> |  |  |  |  | 5     | 9.7E-1  | 1.0E0     |
| <input type="checkbox"/> | GOTERM_BP_ALL          | <a href="#">lymphocyte activation</a>                             | <a href="#">RT</a> |  |  |  |  | 14    | 9.7E-1  | 1.0E0     |
| <input type="checkbox"/> | GOTERM_BP_ALL          | <a href="#">leukocyte differentiation</a>                         | <a href="#">RT</a> |  |  |  |  | 9     | 9.7E-1  | 1.0E0     |
| <input type="checkbox"/> | GOTERM_BP_ALL          | <a href="#">leukocyte activation</a>                              | <a href="#">RT</a> |  |  |  |  | 14    | 9.9E-1  | 1.0E0     |
| <input type="checkbox"/> | GOTERM_BP_ALL          | <a href="#">T cell differentiation</a>                            | <a href="#">RT</a> |  |  |  |  | 3     | 9.9E-1  | 1.0E0     |

|                          |                 |                                                                 |                    |  |       |         |           |
|--------------------------|-----------------|-----------------------------------------------------------------|--------------------|--|-------|---------|-----------|
| <input type="checkbox"/> | GOTERM_BP_ALL   | <a href="#">lymphocyte differentiation</a>                      | <a href="#">RT</a> |  | 5     | 9.9E-1  | 1.0E0     |
| <input type="checkbox"/> | GOTERM_BP_ALL   | <a href="#">cell activation</a>                                 | <a href="#">RT</a> |  | 14    | 9.9E-1  | 1.0E0     |
| <input type="checkbox"/> | GOTERM_BP_ALL   | <a href="#">T cell activation</a>                               | <a href="#">RT</a> |  | 6     | 1.0E0   | 1.0E0     |
| Annotation Cluster 246   |                 | Enrichment Score: 0.01                                          | <b>G</b>           |  | Count | P_Value | Benjamini |
| <input type="checkbox"/> | INTERPRO        | <a href="#">Ras</a>                                             | <a href="#">RT</a> |  | 6     | 9.7E-1  | 1.0E0     |
| <input type="checkbox"/> | SP_PIR_KEYWORDS | <a href="#">prenylation</a>                                     | <a href="#">RT</a> |  | 8     | 9.8E-1  | 1.0E0     |
| <input type="checkbox"/> | UP_SEQ_FEATURE  | short sequence motif: Effector region                           | <a href="#">RT</a> |  | 3     | 1.0E0   | 1.0E0     |
| Annotation Cluster 247   |                 | Enrichment Score: 0                                             | <b>G</b>           |  | Count | P_Value | Benjamini |
| <input type="checkbox"/> | GOTERM_BP_ALL   | <a href="#">cell migration</a>                                  | <a href="#">RT</a> |  | 20    | 9.8E-1  | 1.0E0     |
| <input type="checkbox"/> | GOTERM_BP_ALL   | <a href="#">localization of cell</a>                            | <a href="#">RT</a> |  | 22    | 9.9E-1  | 1.0E0     |
| <input type="checkbox"/> | GOTERM_BP_ALL   | <a href="#">cell motility</a>                                   | <a href="#">RT</a> |  | 22    | 9.9E-1  | 1.0E0     |
| Annotation Cluster 248   |                 | Enrichment Score: 0                                             | <b>G</b>           |  | Count | P_Value | Benjamini |
| <input type="checkbox"/> | SP_PIR_KEYWORDS | <a href="#">spermatogenesis</a>                                 | <a href="#">RT</a> |  | 4     | 9.8E-1  | 1.0E0     |
| <input type="checkbox"/> | GOTERM_BP_ALL   | <a href="#">male gamete generation</a>                          | <a href="#">RT</a> |  | 11    | 9.8E-1  | 1.0E0     |
| <input type="checkbox"/> | GOTERM_BP_ALL   | <a href="#">spermatogenesis</a>                                 | <a href="#">RT</a> |  | 11    | 9.8E-1  | 1.0E0     |
| <input type="checkbox"/> | GOTERM_BP_ALL   | <a href="#">gamete generation</a>                               | <a href="#">RT</a> |  | 15    | 9.9E-1  | 1.0E0     |
| <input type="checkbox"/> | GOTERM_BP_ALL   | <a href="#">sexual reproduction</a>                             | <a href="#">RT</a> |  | 17    | 1.0E0   | 1.0E0     |
| <input type="checkbox"/> | GOTERM_BP_ALL   | <a href="#">reproduction</a>                                    | <a href="#">RT</a> |  | 27    | 1.0E0   | 1.0E0     |
| Annotation Cluster 249   |                 | Enrichment Score: 0                                             | <b>G</b>           |  | Count | P_Value | Benjamini |
| <input type="checkbox"/> | INTERPRO        | <a href="#">Intermediate filament protein</a>                   | <a href="#">RT</a> |  | 3     | 9.8E-1  | 1.0E0     |
| <input type="checkbox"/> | SP_PIR_KEYWORDS | <a href="#">intermediate filament</a>                           | <a href="#">RT</a> |  | 3     | 9.8E-1  | 1.0E0     |
| <input type="checkbox"/> | GOTERM_CC_ALL   | <a href="#">intermediate filament</a>                           | <a href="#">RT</a> |  | 4     | 1.0E0   | 1.0E0     |
| <input type="checkbox"/> | GOTERM_CC_ALL   | <a href="#">intermediate filament cytoskeleton</a>              | <a href="#">RT</a> |  | 4     | 1.0E0   | 1.0E0     |
| Annotation Cluster 250   |                 | Enrichment Score: 0                                             | <b>G</b>           |  | Count | P_Value | Benjamini |
| <input type="checkbox"/> | GOTERM_BP_ALL   | <a href="#">regulation of phosphorylation</a>                   | <a href="#">RT</a> |  | 3     | 9.9E-1  | 1.0E0     |
| <input type="checkbox"/> | GOTERM_BP_ALL   | <a href="#">regulation of phosphate metabolic process</a>       | <a href="#">RT</a> |  | 3     | 9.9E-1  | 1.0E0     |
| <input type="checkbox"/> | GOTERM_BP_ALL   | <a href="#">regulation of phosphorus metabolic process</a>      | <a href="#">RT</a> |  | 3     | 9.9E-1  | 1.0E0     |
| Annotation Cluster 251   |                 | Enrichment Score: 0                                             | <b>G</b>           |  | Count | P_Value | Benjamini |
| <input type="checkbox"/> | GOTERM_BP_ALL   | <a href="#">membrane organization and biogenesis</a>            | <a href="#">RT</a> |  | 17    | 9.7E-1  | 1.0E0     |
| <input type="checkbox"/> | SP_PIR_KEYWORDS | <a href="#">endocytosis</a>                                     | <a href="#">RT</a> |  | 3     | 1.0E0   | 1.0E0     |
| <input type="checkbox"/> | GOTERM_BP_ALL   | <a href="#">endocytosis</a>                                     | <a href="#">RT</a> |  | 7     | 1.0E0   | 1.0E0     |
| <input type="checkbox"/> | GOTERM_BP_ALL   | <a href="#">membrane invagination</a>                           | <a href="#">RT</a> |  | 7     | 1.0E0   | 1.0E0     |
| Annotation Cluster 252   |                 | Enrichment Score: 0                                             | <b>G</b>           |  | Count | P_Value | Benjamini |
| <input type="checkbox"/> | SP_PIR_KEYWORDS | <a href="#">gtpase activation</a>                               | <a href="#">RT</a> |  | 4     | 9.9E-1  | 1.0E0     |
| <input type="checkbox"/> | GOTERM_MF_ALL   | <a href="#">GTPase regulator activity</a>                       | <a href="#">RT</a> |  | 20    | 9.9E-1  | 1.0E0     |
| <input type="checkbox"/> | GOTERM_MF_ALL   | <a href="#">GTPase activator activity</a>                       | <a href="#">RT</a> |  | 8     | 1.0E0   | 1.0E0     |
| <input type="checkbox"/> | GOTERM_MF_ALL   | <a href="#">enzyme activator activity</a>                       | <a href="#">RT</a> |  | 11    | 1.0E0   | 1.0E0     |
| Annotation Cluster 253   |                 | Enrichment Score: 0                                             | <b>G</b>           |  | Count | P_Value | Benjamini |
| <input type="checkbox"/> | INTERPRO        | <a href="#">EGF calcium-binding</a>                             | <a href="#">RT</a> |  | 3     | 9.7E-1  | 1.0E0     |
| <input type="checkbox"/> | SMART           | <a href="#">EGF_CA</a>                                          | <a href="#">RT</a> |  | 3     | 9.9E-1  | 1.0E0     |
| <input type="checkbox"/> | INTERPRO        | <a href="#">Aspartic acid and asparagine hydroxylation site</a> | <a href="#">RT</a> |  | 3     | 1.0E0   | 1.0E0     |
| <input type="checkbox"/> | INTERPRO        | <a href="#">EGF-like calcium-binding</a>                        | <a href="#">RT</a> |  | 3     | 1.0E0   | 1.0E0     |
| <input type="checkbox"/> | SMART           | <a href="#">EGF</a>                                             | <a href="#">RT</a> |  | 4     | 1.0E0   | 1.0E0     |
| <input type="checkbox"/> | INTERPRO        | <a href="#">EGF-like, type 3</a>                                | <a href="#">RT</a> |  | 4     | 1.0E0   | 1.0E0     |
| <input type="checkbox"/> | INTERPRO        | <a href="#">EGF</a>                                             | <a href="#">RT</a> |  | 4     | 1.0E0   | 1.0E0     |
| <input type="checkbox"/> | SP_PIR_KEYWORDS | <a href="#">egf-like domain</a>                                 | <a href="#">RT</a> |  | 4     | 1.0E0   | 1.0E0     |
| <input type="checkbox"/> | INTERPRO        | <a href="#">EGF-like region</a>                                 | <a href="#">RT</a> |  | 4     | 1.0E0   | 1.0E0     |
| Annotation Cluster 254   |                 | Enrichment Score: 0                                             | <b>G</b>           |  | Count | P_Value | Benjamini |
| <input type="checkbox"/> | GOTERM_BP_ALL   | <a href="#">sensory perception of sound</a>                     | <a href="#">RT</a> |  | 3     | 9.9E-1  | 1.0E0     |
| <input type="checkbox"/> | GOTERM_BP_ALL   | <a href="#">sensory perception of mechanical stimulus</a>       | <a href="#">RT</a> |  | 3     | 1.0E0   | 1.0E0     |

| <input type="checkbox"/> | GOTERM_BP_ALL          | <a href="#">sensory perception</a>                                   | RT       |  |  |  |  | 6     | 1.0E0   | 1.0E0     |
|--------------------------|------------------------|----------------------------------------------------------------------|----------|--|--|--|--|-------|---------|-----------|
|                          | Annotation Cluster 255 | Enrichment Score: 0                                                  | <b>G</b> |  |  |  |  | Count | P_Value | Benjamini |
| <input type="checkbox"/> | SMART                  | <a href="#">FN3</a>                                                  | RT       |  |  |  |  | 8     | 9.5E-1  | 1.0E0     |
| <input type="checkbox"/> | INTERPRO               | <a href="#">Fibronectin, type III</a>                                | RT       |  |  |  |  | 8     | 9.9E-1  | 1.0E0     |
| <input type="checkbox"/> | UP_SEQ_FEATURE         | domain:Fibronectin type-III 2                                        | RT       |  |  |  |  | 3     | 9.9E-1  | 1.0E0     |
| <input type="checkbox"/> | UP_SEQ_FEATURE         | domain:Fibronectin type-III 1                                        | RT       |  |  |  |  | 3     | 9.9E-1  | 1.0E0     |
| <input type="checkbox"/> | INTERPRO               | <a href="#">Immunoglobulin I-set</a>                                 | RT       |  |  |  |  | 3     | 1.0E0   | 1.0E0     |
| <input type="checkbox"/> | SMART                  | <a href="#">IG</a>                                                   | RT       |  |  |  |  | 7     | 1.0E0   | 1.0E0     |
| <input type="checkbox"/> | INTERPRO               | <a href="#">Fibronectin, type III-like fold</a>                      | RT       |  |  |  |  | 5     | 1.0E0   | 1.0E0     |
| <input type="checkbox"/> | SMART                  | <a href="#">IGc2</a>                                                 | RT       |  |  |  |  | 3     | 1.0E0   | 1.0E0     |
| <input type="checkbox"/> | INTERPRO               | <a href="#">Immunoglobulin subtype</a>                               | RT       |  |  |  |  | 7     | 1.0E0   | 1.0E0     |
| <input type="checkbox"/> | INTERPRO               | <a href="#">Immunoglobulin subtype 2</a>                             | RT       |  |  |  |  | 3     | 1.0E0   | 1.0E0     |
| <input type="checkbox"/> | INTERPRO               | <a href="#">Immunoglobulin V-set</a>                                 | RT       |  |  |  |  | 3     | 1.0E0   | 1.0E0     |
| <input type="checkbox"/> | INTERPRO               | <a href="#">Immunoglobulin</a>                                       | RT       |  |  |  |  | 3     | 1.0E0   | 1.0E0     |
| <input type="checkbox"/> | INTERPRO               | <a href="#">Immunoglobulin-like</a>                                  | RT       |  |  |  |  | 10    | 1.0E0   | 1.0E0     |
| <input type="checkbox"/> | INTERPRO               | <a href="#">Immunoglobulin-like fold</a>                             | RT       |  |  |  |  | 9     | 1.0E0   | 1.0E0     |
| <input type="checkbox"/> | SP_PIR_KEYWORDS        | <a href="#">immunoglobulin domain</a>                                | RT       |  |  |  |  | 8     | 1.0E0   | 1.0E0     |
|                          | Annotation Cluster 256 | Enrichment Score: 0                                                  | <b>G</b> |  |  |  |  | Count | P_Value | Benjamini |
| <input type="checkbox"/> | SP_PIR_KEYWORDS        | <a href="#">G protein-coupled receptor</a>                           | RT       |  |  |  |  | 3     | 9.8E-1  | 1.0E0     |
| <input type="checkbox"/> | GOTERM_MF_ALL          | <a href="#">nucleotide receptor activity, G-protein coupled</a>      | RT       |  |  |  |  | 3     | 9.8E-1  | 1.0E0     |
| <input type="checkbox"/> | GOTERM_MF_ALL          | <a href="#">nucleotide receptor activity</a>                         | RT       |  |  |  |  | 3     | 9.8E-1  | 1.0E0     |
| <input type="checkbox"/> | PIR_SUPERFAMILY        | PIRSF002406:vertebrate rhodopsin                                     | RT       |  |  |  |  | 3     | 1.0E0   | 1.0E0     |
| <input type="checkbox"/> | UP_SEQ_FEATURE         | lipid moiety-binding region:S-palmitoyl cysteine                     | RT       |  |  |  |  | 5     | 1.0E0   | 1.0E0     |
| <input type="checkbox"/> | INTERPRO               | <a href="#">Rhodopsin-like GPCR superfamily</a>                      | RT       |  |  |  |  | 6     | 1.0E0   | 1.0E0     |
| <input type="checkbox"/> | KEGG_PATHWAY           | <a href="#">Neuroactive ligand-receptor interaction</a>              | RT       |  |  |  |  | 4     | 1.0E0   | 1.0E0     |
| <input type="checkbox"/> | GOTERM_MF_ALL          | <a href="#">rhodopsin-like receptor activity</a>                     | RT       |  |  |  |  | 5     | 1.0E0   | 1.0E0     |
| <input type="checkbox"/> | SP_PIR_KEYWORDS        | <a href="#">transducer</a>                                           | RT       |  |  |  |  | 7     | 1.0E0   | 1.0E0     |
| <input type="checkbox"/> | SP_PIR_KEYWORDS        | <a href="#">g-protein coupled receptor</a>                           | RT       |  |  |  |  | 5     | 1.0E0   | 1.0E0     |
| <input type="checkbox"/> | GOTERM_BP_ALL          | <a href="#">G-protein coupled receptor protein signaling pathway</a> | RT       |  |  |  |  | 14    | 1.0E0   | 1.0E0     |
| <input type="checkbox"/> | GOTERM_MF_ALL          | <a href="#">G-protein coupled receptor activity</a>                  | RT       |  |  |  |  | 5     | 1.0E0   | 1.0E0     |
| <input type="checkbox"/> | GOTERM_MF_ALL          | <a href="#">transmembrane receptor activity</a>                      | RT       |  |  |  |  | 11    | 1.0E0   | 1.0E0     |
|                          | Annotation Cluster 257 | Enrichment Score: 0                                                  | <b>G</b> |  |  |  |  | Count | P_Value | Benjamini |
| <input type="checkbox"/> | INTERPRO               | <a href="#">Concanavalin A-like lectin/glucanase, subgroup</a>       | RT       |  |  |  |  | 3     | 9.9E-1  | 1.0E0     |
| <input type="checkbox"/> | GOTERM_MF_ALL          | <a href="#">carbohydrate binding</a>                                 | RT       |  |  |  |  | 15    | 1.0E0   | 1.0E0     |
| <input type="checkbox"/> | GOTERM_MF_ALL          | <a href="#">sugar binding</a>                                        | RT       |  |  |  |  | 7     | 1.0E0   | 1.0E0     |
| <input type="checkbox"/> | SP_PIR_KEYWORDS        | <a href="#">lectin</a>                                               | RT       |  |  |  |  | 5     | 1.0E0   | 1.0E0     |
|                          | Annotation Cluster 258 | Enrichment Score: 0                                                  | <b>G</b> |  |  |  |  | Count | P_Value | Benjamini |
| <input type="checkbox"/> | GOTERM_BP_ALL          | <a href="#">forebrain development</a>                                | RT       |  |  |  |  | 5     | 9.9E-1  | 1.0E0     |
| <input type="checkbox"/> | GOTERM_BP_ALL          | <a href="#">brain development</a>                                    | RT       |  |  |  |  | 7     | 1.0E0   | 1.0E0     |
| <input type="checkbox"/> | GOTERM_BP_ALL          | <a href="#">central nervous system development</a>                   | RT       |  |  |  |  | 9     | 1.0E0   | 1.0E0     |
|                          | Annotation Cluster 259 | Enrichment Score: 0                                                  | <b>G</b> |  |  |  |  | Count | P_Value | Benjamini |
| <input type="checkbox"/> | GOTERM_CC_ALL          | <a href="#">basement membrane</a>                                    | RT       |  |  |  |  | 3     | 9.9E-1  | 1.0E0     |
| <input type="checkbox"/> | GOTERM_CC_ALL          | <a href="#">extracellular matrix part</a>                            | RT       |  |  |  |  | 3     | 1.0E0   | 1.0E0     |
| <input type="checkbox"/> | SP_PIR_KEYWORDS        | <a href="#">extracellular matrix</a>                                 | RT       |  |  |  |  | 5     | 1.0E0   | 1.0E0     |
| <input type="checkbox"/> | GOTERM_CC_ALL          | <a href="#">proteinaceous extracellular matrix</a>                   | RT       |  |  |  |  | 5     | 1.0E0   | 1.0E0     |
| <input type="checkbox"/> | GOTERM_CC_ALL          | <a href="#">extracellular matrix</a>                                 | RT       |  |  |  |  | 5     | 1.0E0   | 1.0E0     |
|                          | Annotation Cluster 260 | Enrichment Score: 0                                                  | <b>G</b> |  |  |  |  | Count | P_Value | Benjamini |
| <input type="checkbox"/> | SP_PIR_KEYWORDS        | <a href="#">protease</a>                                             | RT       |  |  |  |  | 29    | 1.0E0   | 1.0E0     |

| <input type="checkbox"/> | Annotation      | Enrichment Score: 0                                            | G  | Count | P_Value | Benjamini |
|--------------------------|-----------------|----------------------------------------------------------------|----|-------|---------|-----------|
| <input type="checkbox"/> | GOTERM_BP_ALL   | <a href="#">proteolysis</a>                                    | RT | 46    | 1.0E0   | 1.0E0     |
| <input type="checkbox"/> | GOTERM_MF_ALL   | <a href="#">peptidase activity</a>                             | RT | 42    | 1.0E0   | 1.0E0     |
| <input type="checkbox"/> | GOTERM_MF_ALL   | <a href="#">endopeptidase activity</a>                         | RT | 22    | 1.0E0   | 1.0E0     |
| Annotation Cluster 261   |                 |                                                                |    |       |         |           |
| <input type="checkbox"/> | GOTERM_BP_ALL   | <a href="#">ossification</a>                                   | RT | 4     | 1.0E0   | 1.0E0     |
| <input type="checkbox"/> | GOTERM_BP_ALL   | <a href="#">biomineral formation</a>                           | RT | 4     | 1.0E0   | 1.0E0     |
| <input type="checkbox"/> | GOTERM_BP_ALL   | <a href="#">bone remodeling</a>                                | RT | 4     | 1.0E0   | 1.0E0     |
| <input type="checkbox"/> | GOTERM_BP_ALL   | <a href="#">tissue remodeling</a>                              | RT | 4     | 1.0E0   | 1.0E0     |
| <input type="checkbox"/> | GOTERM_BP_ALL   | <a href="#">skeletal development</a>                           | RT | 7     | 1.0E0   | 1.0E0     |
| Annotation Cluster 262   |                 |                                                                |    |       |         |           |
| <input type="checkbox"/> | GOTERM_BP_ALL   | <a href="#">negative regulation of developmental process</a>   | RT | 4     | 1.0E0   | 1.0E0     |
| <input type="checkbox"/> | GOTERM_BP_ALL   | <a href="#">negative regulation of cell differentiation</a>    | RT | 3     | 1.0E0   | 1.0E0     |
| <input type="checkbox"/> | GOTERM_BP_ALL   | <a href="#">regulation of cell differentiation</a>             | RT | 7     | 1.0E0   | 1.0E0     |
| Annotation Cluster 263   |                 |                                                                |    |       |         |           |
| <input type="checkbox"/> | SP_PIR_KEYWORDS | <a href="#">potassium</a>                                      | RT | 3     | 1.0E0   | 1.0E0     |
| <input type="checkbox"/> | GOTERM_MF_ALL   | <a href="#">potassium ion binding</a>                          | RT | 3     | 1.0E0   | 1.0E0     |
| <input type="checkbox"/> | GOTERM_MF_ALL   | <a href="#">alkali metal ion binding</a>                       | RT | 6     | 1.0E0   | 1.0E0     |
| Annotation Cluster 264   |                 |                                                                |    |       |         |           |
| <input type="checkbox"/> | UP_SEQ_FEATURE  | zinc finger region:C2H2-type 1                                 | RT | 5     | 1.0E0   | 1.0E0     |
| <input type="checkbox"/> | UP_SEQ_FEATURE  | zinc finger region:C2H2-type 3                                 | RT | 4     | 1.0E0   | 1.0E0     |
| <input type="checkbox"/> | UP_SEQ_FEATURE  | zinc finger region:C2H2-type 2                                 | RT | 4     | 1.0E0   | 1.0E0     |
| Annotation Cluster 265   |                 |                                                                |    |       |         |           |
| <input type="checkbox"/> | GOTERM_BP_ALL   | <a href="#">regulation of cell size</a>                        | RT | 5     | 1.0E0   | 1.0E0     |
| <input type="checkbox"/> | GOTERM_BP_ALL   | <a href="#">regulation of cell growth</a>                      | RT | 3     | 1.0E0   | 1.0E0     |
| <input type="checkbox"/> | GOTERM_BP_ALL   | <a href="#">cell growth</a>                                    | RT | 3     | 1.0E0   | 1.0E0     |
| <input type="checkbox"/> | GOTERM_BP_ALL   | <a href="#">regulation of growth</a>                           | RT | 5     | 1.0E0   | 1.0E0     |
| Annotation Cluster 266   |                 |                                                                |    |       |         |           |
| <input type="checkbox"/> | GOTERM_CC_ALL   | <a href="#">cytoplasmic membrane-bound vesicle</a>             | RT | 10    | 1.0E0   | 1.0E0     |
| <input type="checkbox"/> | GOTERM_CC_ALL   | <a href="#">membrane-bound vesicle</a>                         | RT | 10    | 1.0E0   | 1.0E0     |
| <input type="checkbox"/> | GOTERM_CC_ALL   | <a href="#">cytoplasmic vesicle</a>                            | RT | 15    | 1.0E0   | 1.0E0     |
| <input type="checkbox"/> | GOTERM_CC_ALL   | <a href="#">vesicle</a>                                        | RT | 15    | 1.0E0   | 1.0E0     |
| Annotation Cluster 267   |                 |                                                                |    |       |         |           |
| <input type="checkbox"/> | GOTERM_BP_ALL   | <a href="#">regulation of lymphocyte activation</a>            | RT | 3     | 1.0E0   | 1.0E0     |
| <input type="checkbox"/> | GOTERM_BP_ALL   | <a href="#">regulation of cell activation</a>                  | RT | 3     | 1.0E0   | 1.0E0     |
| <input type="checkbox"/> | GOTERM_BP_ALL   | <a href="#">regulation of multicellular organismal process</a> | RT | 9     | 1.0E0   | 1.0E0     |
| Annotation Cluster 268   |                 |                                                                |    |       |         |           |
| <input type="checkbox"/> | GOTERM_BP_ALL   | <a href="#">synaptic transmission</a>                          | RT | 10    | 1.0E0   | 1.0E0     |
| <input type="checkbox"/> | GOTERM_BP_ALL   | <a href="#">transmission of nerve impulse</a>                  | RT | 10    | 1.0E0   | 1.0E0     |
| <input type="checkbox"/> | GOTERM_BP_ALL   | <a href="#">cell-cell signaling</a>                            | RT | 11    | 1.0E0   | 1.0E0     |
| <input type="checkbox"/> | GOTERM_BP_ALL   | <a href="#">neurological system process</a>                    | RT | 15    | 1.0E0   | 1.0E0     |
| <input type="checkbox"/> | GOTERM_BP_ALL   | <a href="#">system process</a>                                 | RT | 20    | 1.0E0   | 1.0E0     |
| Annotation Cluster 269   |                 |                                                                |    |       |         |           |
| <input type="checkbox"/> | GOTERM_BP_ALL   | <a href="#">regulation of immune response</a>                  | RT | 3     | 1.0E0   | 1.0E0     |
| <input type="checkbox"/> | GOTERM_BP_ALL   | <a href="#">regulation of immune system process</a>            | RT | 3     | 1.0E0   | 1.0E0     |
| <input type="checkbox"/> | GOTERM_BP_ALL   | <a href="#">regulation of multicellular organismal process</a> | RT | 9     | 1.0E0   | 1.0E0     |
| Annotation Cluster 270   |                 |                                                                |    |       |         |           |
| <input type="checkbox"/> | GOTERM_MF_ALL   | <a href="#">GPI anchor binding</a>                             | RT | 3     | 1.0E0   | 1.0E0     |
| <input type="checkbox"/> | GOTERM_MF_ALL   | <a href="#">phosphoinositide binding</a>                       | RT | 5     | 1.0E0   | 1.0E0     |
| <input type="checkbox"/> | GOTERM_MF_ALL   | <a href="#">phospholipid binding</a>                           | RT | 6     | 1.0E0   | 1.0E0     |
| <input type="checkbox"/> | GOTERM_MF_ALL   | <a href="#">lipid binding</a>                                  | RT | 15    | 1.0E0   | 1.0E0     |



| Annotation Cluster 271   |                 | Enrichment Score: 0                             | G  |  | Count | P_Value | Benjamini |
|--------------------------|-----------------|-------------------------------------------------|----|--|-------|---------|-----------|
| <input type="checkbox"/> | SP_PIR_KEYWORDS | <a href="#">zinc</a>                            | RT |  | 99    | 1.0E0   | 1.0E0     |
| <input type="checkbox"/> | SP_PIR_KEYWORDS | <a href="#">zinc-finger</a>                     | RT |  | 71    | 1.0E0   | 1.0E0     |
| <input type="checkbox"/> | GOTERM_MF_ALL   | <a href="#">zinc ion binding</a>                | RT |  | 118   | 1.0E0   | 1.0E0     |
| <input type="checkbox"/> | GOTERM_MF_ALL   | <a href="#">transition metal ion binding</a>    | RT |  | 154   | 1.0E0   | 1.0E0     |
| <input type="checkbox"/> | SP_PIR_KEYWORDS | <a href="#">metal-binding</a>                   | RT |  | 141   | 1.0E0   | 1.0E0     |
| <input type="checkbox"/> | GOTERM_MF_ALL   | <a href="#">metal ion binding</a>               | RT |  | 224   | 1.0E0   | 1.0E0     |
| <input type="checkbox"/> | GOTERM_MF_ALL   | <a href="#">ion binding</a>                     | RT |  | 226   | 1.0E0   | 1.0E0     |
| <input type="checkbox"/> | GOTERM_MF_ALL   | <a href="#">cation binding</a>                  | RT |  | 183   | 1.0E0   | 1.0E0     |
| Annotation Cluster 272   |                 | Enrichment Score: 0                             | G  |  | Count | P_Value | Benjamini |
| <input type="checkbox"/> | SMART           | <a href="#">ZnF_C2H2</a>                        | RT |  | 8     | 1.0E0   | 1.0E0     |
| <input type="checkbox"/> | INTERPRO        | <a href="#">Zinc finger, C2H2-type</a>          | RT |  | 14    | 1.0E0   | 1.0E0     |
| <input type="checkbox"/> | INTERPRO        | <a href="#">Zinc finger, C2H2-like</a>          | RT |  | 8     | 1.0E0   | 1.0E0     |
| Annotation Cluster 273   |                 | Enrichment Score: 0                             | G  |  | Count | P_Value | Benjamini |
| <input type="checkbox"/> | GOTERM_CC_ALL   | <a href="#">integral to plasma membrane</a>     | RT |  | 19    | 1.0E0   | 1.0E0     |
| <input type="checkbox"/> | GOTERM_CC_ALL   | <a href="#">intrinsic to plasma membrane</a>    | RT |  | 19    | 1.0E0   | 1.0E0     |
| <input type="checkbox"/> | GOTERM_CC_ALL   | <a href="#">plasma membrane part</a>            | RT |  | 36    | 1.0E0   | 1.0E0     |
| Annotation Cluster 274   |                 | Enrichment Score: 0                             | G  |  | Count | P_Value | Benjamini |
| <input type="checkbox"/> | SP_PIR_KEYWORDS | <a href="#">cell adhesion</a>                   | RT |  | 6     | 1.0E0   | 1.0E0     |
| <input type="checkbox"/> | GOTERM_BP_ALL   | <a href="#">cell adhesion</a>                   | RT |  | 16    | 1.0E0   | 1.0E0     |
| <input type="checkbox"/> | GOTERM_BP_ALL   | <a href="#">biological adhesion</a>             | RT |  | 16    | 1.0E0   | 1.0E0     |
| Annotation Cluster 275   |                 | Enrichment Score: 0                             | G  |  | Count | P_Value | Benjamini |
| <input type="checkbox"/> | GOTERM_BP_ALL   | <a href="#">intracellular signaling cascade</a> | RT |  | 56    | 1.0E0   | 1.0E0     |
| <input type="checkbox"/> | GOTERM_BP_ALL   | <a href="#">signal transduction</a>             | RT |  | 108   | 1.0E0   | 1.0E0     |
| <input type="checkbox"/> | GOTERM_BP_ALL   | <a href="#">cell communication</a>              | RT |  | 118   | 1.0E0   | 1.0E0     |
| Annotation Cluster 276   |                 | Enrichment Score: -0                            | G  |  | Count | P_Value | Benjamini |
| <input type="checkbox"/> | UP_SEQ_FEATURE  | topological domain:Extracellular                | RT |  | 35    | 1.0E0   | 1.0E0     |
| <input type="checkbox"/> | UP_SEQ_FEATURE  | topological domain:Cytoplasmic                  | RT |  | 56    | 1.0E0   | 1.0E0     |
| <input type="checkbox"/> | UP_SEQ_FEATURE  | glycosylation site:N-linked (GlcNAc...)         | RT |  | 67    | 1.0E0   | 1.0E0     |
| Annotation Cluster 277   |                 | Enrichment Score: -0                            | G  |  | Count | P_Value | Benjamini |
| <input type="checkbox"/> | GOTERM_CC_ALL   | <a href="#">extracellular region</a>            | RT |  | 90    | 1.0E0   | 1.0E0     |
| <input type="checkbox"/> | GOTERM_CC_ALL   | <a href="#">extracellular region part</a>       | RT |  | 87    | 1.0E0   | 1.0E0     |
| <input type="checkbox"/> | GOTERM_CC_ALL   | <a href="#">extracellular space</a>             | RT |  | 86    | 1.0E0   | 1.0E0     |
| <input type="checkbox"/> | SP_PIR_KEYWORDS | <a href="#">signal</a>                          | RT |  | 75    | 1.0E0   | 1.0E0     |
| Annotation Cluster 278   |                 | Enrichment Score: -0                            | G  |  | Count | P_Value | Benjamini |
| <input type="checkbox"/> | SP_PIR_KEYWORDS | <a href="#">receptor</a>                        | RT |  | 39    | 1.0E0   | 1.0E0     |
| <input type="checkbox"/> | GOTERM_MF_ALL   | <a href="#">receptor activity</a>               | RT |  | 53    | 1.0E0   | 1.0E0     |
| <input type="checkbox"/> | GOTERM_MF_ALL   | <a href="#">signal transducer activity</a>      | RT |  | 67    | 1.0E0   | 1.0E0     |
| <input type="checkbox"/> | GOTERM_MF_ALL   | <a href="#">molecular transducer activity</a>   | RT |  | 67    | 1.0E0   | 1.0E0     |
| Annotation Cluster 279   |                 | Enrichment Score: -0                            | G  |  | Count | P_Value | Benjamini |
| <input type="checkbox"/> | GOTERM_CC_ALL   | <a href="#">membrane part</a>                   | RT |  | 256   | 1.0E0   | 1.0E0     |
| <input type="checkbox"/> | SP_PIR_KEYWORDS | <a href="#">transmembrane</a>                   | RT |  | 160   | 1.0E0   | 1.0E0     |
| <input type="checkbox"/> | GOTERM_CC_ALL   | <a href="#">membrane</a>                        | RT |  | 341   | 1.0E0   | 1.0E0     |
| <input type="checkbox"/> | GOTERM_CC_ALL   | <a href="#">integral to membrane</a>            | RT |  | 231   | 1.0E0   | 1.0E0     |
| <input type="checkbox"/> | SP_PIR_KEYWORDS | <a href="#">membrane</a>                        | RT |  | 216   | 1.0E0   | 1.0E0     |
| <input type="checkbox"/> | GOTERM_CC_ALL   | <a href="#">intrinsic to membrane</a>           | RT |  | 231   | 1.0E0   | 1.0E0     |
| <input type="checkbox"/> | UP_SEQ_FEATURE  | transmembrane region                            | RT |  | 111   | 1.0E0   | 1.0E0     |
| Annotation Cluster 280   |                 | Enrichment Score: -0                            | G  |  | Count | P_Value | Benjamini |
| <input type="checkbox"/> | SP_PIR_KEYWORDS | <a href="#">glycoprotein</a>                    | RT |  | 95    | 1.0E0   | 1.0E0     |
| <input type="checkbox"/> | UP_SEQ_FEATURE  | disulfide bond                                  | RT |  | 54    | 1.0E0   | 1.0E0     |

|                          |                        |                                         |                    |  |    |       |       |
|--------------------------|------------------------|-----------------------------------------|--------------------|--|----|-------|-------|
| <input type="checkbox"/> | <b>UP_SEQ_FEATURE</b>  | signal peptide                          | <a href="#">RT</a> |  | 57 | 1.0E0 | 1.0E0 |
| <input type="checkbox"/> | <b>UP_SEQ_FEATURE</b>  | glycosylation site:N-linked (GlcNAc...) | <a href="#">RT</a> |  | 67 | 1.0E0 | 1.0E0 |
| <input type="checkbox"/> | <b>SP_PIR_KEYWORDS</b> | <a href="#">signal</a>                  | <a href="#">RT</a> |  | 75 | 1.0E0 | 1.0E0 |

573 terms were not clustered.

Please cite the web site or [Genome Biology 2003; 4\(5\):P3](#) within any publication that makes use of any methods inspired by **DAVID**.

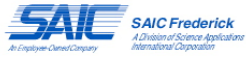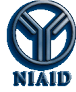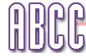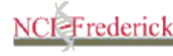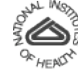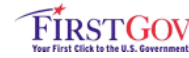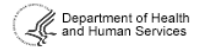

[Term of Service](#) | [Contact Us](#) | [Site Map](#)

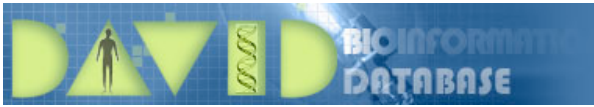

## Functional Annotation Clustering Of Genes Upregulated >2 in WT But Not In WASP Deficient BMDCs

[Help and Manual](#)

Current Gene List: wt1 not wsp1 >2up

313 DAVID IDs

Options Classification Stringency Medium

Rerun using options

Create Sublist

[Download File](#)

| Annotation Cluster 1     |                 | Enrichment Score: 3.14                                  | G                  |  | Count | P_Value | Benjamini |
|--------------------------|-----------------|---------------------------------------------------------|--------------------|--|-------|---------|-----------|
| <input type="checkbox"/> | UP_SEQ_FEATURE  | repeat:WD 7                                             | <a href="#">RT</a> |  | 9     | 2.7E-5  | 3.1E-1    |
| <input type="checkbox"/> | UP_SEQ_FEATURE  | repeat:WD 6                                             | <a href="#">RT</a> |  | 10    | 7.5E-5  | 4.1E-1    |
| <input type="checkbox"/> | UP_SEQ_FEATURE  | repeat:WD 5                                             | <a href="#">RT</a> |  | 11    | 1.1E-4  | 4.2E-1    |
| <input type="checkbox"/> | UP_SEQ_FEATURE  | repeat:WD 4                                             | <a href="#">RT</a> |  | 11    | 2.0E-4  | 5.1E-1    |
| <input type="checkbox"/> | UP_SEQ_FEATURE  | repeat:WD 3                                             | <a href="#">RT</a> |  | 11    | 3.2E-4  | 5.9E-1    |
| <input type="checkbox"/> | UP_SEQ_FEATURE  | repeat:WD 2                                             | <a href="#">RT</a> |  | 11    | 3.6E-4  | 5.2E-1    |
| <input type="checkbox"/> | UP_SEQ_FEATURE  | repeat:WD 1                                             | <a href="#">RT</a> |  | 11    | 3.6E-4  | 5.2E-1    |
| <input type="checkbox"/> | UP_SEQ_FEATURE  | repeat:WD 8                                             | <a href="#">RT</a> |  | 4     | 2.7E-3  | 9.9E-1    |
| <input type="checkbox"/> | SP_PIR_KEYWORDS | <a href="#">wd repeat</a>                               | <a href="#">RT</a> |  | 12    | 4.1E-3  | 5.1E-1    |
| <input type="checkbox"/> | INTERPRO        | <a href="#">WD40 repeat</a>                             | <a href="#">RT</a> |  | 9     | 2.8E-2  | 1.0E0     |
| <input type="checkbox"/> | SMART           | <a href="#">WD40</a>                                    | <a href="#">RT</a> |  | 9     | 5.0E-2  | 1.0E0     |
| Annotation Cluster 2     |                 | Enrichment Score: 1.72                                  | G                  |  | Count | P_Value | Benjamini |
| <input type="checkbox"/> | SP_PIR_KEYWORDS | <a href="#">lectin</a>                                  | <a href="#">RT</a> |  | 12    | 1.8E-4  | 7.3E-2    |
| <input type="checkbox"/> | GOTERM_MF_ALL   | <a href="#">sugar binding</a>                           | <a href="#">RT</a> |  | 12    | 9.7E-4  | 9.2E-1    |
| <input type="checkbox"/> | GOTERM_MF_ALL   | <a href="#">carbohydrate binding</a>                    | <a href="#">RT</a> |  | 12    | 2.0E-2  | 9.0E-1    |
| <input type="checkbox"/> | INTERPRO        | <a href="#">Type II antifreeze protein</a>              | <a href="#">RT</a> |  | 4     | 3.2E-2  | 1.0E0     |
| <input type="checkbox"/> | INTERPRO        | <a href="#">C-type lectin</a>                           | <a href="#">RT</a> |  | 5     | 1.5E-1  | 1.0E0     |
| <input type="checkbox"/> | SMART           | <a href="#">CLECT</a>                                   | <a href="#">RT</a> |  | 5     | 1.7E-1  | 1.0E0     |
| <input type="checkbox"/> | UP_SEQ_FEATURE  | domain:C-type lectin                                    | <a href="#">RT</a> |  | 3     | 3.2E-1  | 1.0E0     |
| Annotation Cluster 3     |                 | Enrichment Score: 1.49                                  | G                  |  | Count | P_Value | Benjamini |
| <input type="checkbox"/> | GOTERM_CC_ALL   | <a href="#">cytoplasm</a>                               | <a href="#">RT</a> |  | 135   | 1.9E-5  | 1.5E-2    |
| <input type="checkbox"/> | GOTERM_CC_ALL   | <a href="#">cytoplasmic part</a>                        | <a href="#">RT</a> |  | 78    | 6.6E-3  | 7.2E-1    |
| <input type="checkbox"/> | GOTERM_CC_ALL   | <a href="#">cell</a>                                    | <a href="#">RT</a> |  | 239   | 1.2E-2  | 6.5E-1    |
| <input type="checkbox"/> | GOTERM_CC_ALL   | <a href="#">cell part</a>                               | <a href="#">RT</a> |  | 239   | 1.2E-2  | 6.5E-1    |
| <input type="checkbox"/> | GOTERM_CC_ALL   | <a href="#">intracellular part</a>                      | <a href="#">RT</a> |  | 172   | 4.0E-2  | 9.0E-1    |
| <input type="checkbox"/> | GOTERM_CC_ALL   | <a href="#">intracellular</a>                           | <a href="#">RT</a> |  | 179   | 5.8E-2  | 9.1E-1    |
| <input type="checkbox"/> | GOTERM_CC_ALL   | <a href="#">intracellular membrane-bound organelle</a>  | <a href="#">RT</a> |  | 126   | 1.7E-1  | 9.8E-1    |
| <input type="checkbox"/> | GOTERM_CC_ALL   | <a href="#">membrane-bound organelle</a>                | <a href="#">RT</a> |  | 126   | 1.8E-1  | 9.8E-1    |
| <input type="checkbox"/> | GOTERM_CC_ALL   | <a href="#">intracellular organelle</a>                 | <a href="#">RT</a> |  | 139   | 2.3E-1  | 9.9E-1    |
| <input type="checkbox"/> | GOTERM_CC_ALL   | <a href="#">organelle</a>                               | <a href="#">RT</a> |  | 139   | 2.4E-1  | 9.9E-1    |
| <input type="checkbox"/> | GOTERM_CC_ALL   | <a href="#">nucleus</a>                                 | <a href="#">RT</a> |  | 76    | 4.8E-1  | 1.0E0     |
| Annotation Cluster 4     |                 | Enrichment Score: 1.45                                  | G                  |  | Count | P_Value | Benjamini |
| <input type="checkbox"/> | SP_PIR_KEYWORDS | <a href="#">lysosome</a>                                | <a href="#">RT</a> |  | 8     | 5.9E-3  | 5.8E-1    |
| <input type="checkbox"/> | GOTERM_CC_ALL   | <a href="#">lytic vacuole</a>                           | <a href="#">RT</a> |  | 8     | 5.5E-2  | 9.2E-1    |
| <input type="checkbox"/> | GOTERM_CC_ALL   | <a href="#">lysosome</a>                                | <a href="#">RT</a> |  | 8     | 5.5E-2  | 9.2E-1    |
| <input type="checkbox"/> | GOTERM_CC_ALL   | <a href="#">vacuole</a>                                 | <a href="#">RT</a> |  | 8     | 9.0E-2  | 9.3E-1    |
| Annotation Cluster 5     |                 | Enrichment Score: 1.43                                  | G                  |  | Count | P_Value | Benjamini |
| <input type="checkbox"/> | GOTERM_BP_ALL   | <a href="#">protein metabolic process</a>               | <a href="#">RT</a> |  | 79    | 9.5E-4  | 9.9E-1    |
| <input type="checkbox"/> | GOTERM_BP_ALL   | <a href="#">post-translational protein modification</a> | <a href="#">RT</a> |  | 41    | 2.4E-3  | 1.0E0     |

| <input type="checkbox"/> | Annotation      | Gene                                                                       | RT | Bar | Count                  | P_Value  | Benjamini |
|--------------------------|-----------------|----------------------------------------------------------------------------|----|-----|------------------------|----------|-----------|
| <input type="checkbox"/> | GOTERM_BP_ALL   | <a href="#">protein modification process</a>                               | RT |     | 43                     | 9.5E-3   | 1.0E0     |
| <input type="checkbox"/> | GOTERM_BP_ALL   | <a href="#">cellular protein metabolic process</a>                         | RT |     | 71                     | 9.6E-3   | 1.0E0     |
| <input type="checkbox"/> | GOTERM_BP_ALL   | <a href="#">biopolymer modification</a>                                    | RT |     | 44                     | 1.1E-2   | 1.0E0     |
| <input type="checkbox"/> | GOTERM_BP_ALL   | <a href="#">cellular macromolecule metabolic process</a>                   | RT |     | 71                     | 1.3E-2   | 1.0E0     |
| <input type="checkbox"/> | GOTERM_BP_ALL   | <a href="#">macromolecule metabolic process</a>                            | RT |     | 120                    | 1.1E-1   | 1.0E0     |
| <input type="checkbox"/> | GOTERM_BP_ALL   | <a href="#">cellular process</a>                                           | RT |     | 201                    | 1.1E-1   | 1.0E0     |
| <input type="checkbox"/> | GOTERM_BP_ALL   | <a href="#">primary metabolic process</a>                                  | RT |     | 133                    | 2.0E-1   | 1.0E0     |
| <input type="checkbox"/> | GOTERM_BP_ALL   | <a href="#">biopolymer metabolic process</a>                               | RT |     | 87                     | 3.3E-1   | 1.0E0     |
| <input type="checkbox"/> | GOTERM_BP_ALL   | <a href="#">metabolic process</a>                                          | RT |     | 140                    | 5.3E-1   | 1.0E0     |
| <input type="checkbox"/> | GOTERM_BP_ALL   | <a href="#">cellular metabolic process</a>                                 | RT |     | 126                    | 5.4E-1   | 1.0E0     |
| Annotation Cluster 6     |                 |                                                                            |    |     | Enrichment Score: 1.36 | <b>G</b> |           |
| <input type="checkbox"/> | PIR_SUPERFAMILY | PIRSF002359:annexin I                                                      | RT |     | 3                      | 1.8E-2   | 1.0E0     |
| <input type="checkbox"/> | SP_PIR_KEYWORDS | <a href="#">annexin</a>                                                    | RT |     | 3                      | 2.3E-2   | 7.9E-1    |
| <input type="checkbox"/> | INTERPRO        | <a href="#">Annexin</a>                                                    | RT |     | 3                      | 2.5E-2   | 1.0E0     |
| <input type="checkbox"/> | SMART           | <a href="#">ANX</a>                                                        | RT |     | 3                      | 2.6E-2   | 1.0E0     |
| <input type="checkbox"/> | SP_PIR_KEYWORDS | <a href="#">calcium/phospholipid-binding</a>                               | RT |     | 3                      | 2.7E-2   | 7.9E-1    |
| <input type="checkbox"/> | GOTERM_MF_ALL   | <a href="#">calcium-dependent phospholipid binding</a>                     | RT |     | 3                      | 7.4E-2   | 9.9E-1    |
| <input type="checkbox"/> | GOTERM_MF_ALL   | <a href="#">phospholipid binding</a>                                       | RT |     | 5                      | 5.9E-1   | 1.0E0     |
| Annotation Cluster 7     |                 |                                                                            |    |     | Enrichment Score: 1.35 | <b>G</b> |           |
| <input type="checkbox"/> | UP_SEQ_FEATURE  | domain:KH 3                                                                | RT |     | 3                      | 1.1E-2   | 1.0E0     |
| <input type="checkbox"/> | UP_SEQ_FEATURE  | domain:KH 1                                                                | RT |     | 3                      | 2.5E-2   | 1.0E0     |
| <input type="checkbox"/> | UP_SEQ_FEATURE  | domain:KH 2                                                                | RT |     | 3                      | 2.5E-2   | 1.0E0     |
| <input type="checkbox"/> | INTERPRO        | <a href="#">K Homology</a>                                                 | RT |     | 3                      | 9.9E-2   | 1.0E0     |
| <input type="checkbox"/> | INTERPRO        | <a href="#">K Homology, type 1</a>                                         | RT |     | 3                      | 1.0E-1   | 1.0E0     |
| <input type="checkbox"/> | SMART           | <a href="#">KH</a>                                                         | RT |     | 3                      | 1.1E-1   | 1.0E0     |
| Annotation Cluster 8     |                 |                                                                            |    |     | Enrichment Score: 1.33 | <b>G</b> |           |
| <input type="checkbox"/> | SMART           | <a href="#">UBCc</a>                                                       | RT |     | 6                      | 1.9E-3   | 6.9E-1    |
| <input type="checkbox"/> | PIR_SUPERFAMILY | PIRSF001567:ubiquitin-protein ligase E2                                    | RT |     | 4                      | 5.0E-3   | 1.0E0     |
| <input type="checkbox"/> | GOTERM_MF_ALL   | <a href="#">ubiquitin-protein ligase activity</a>                          | RT |     | 8                      | 7.3E-3   | 8.1E-1    |
| <input type="checkbox"/> | INTERPRO        | <a href="#">Ubiquitin-conjugating enzyme, E2</a>                           | RT |     | 5                      | 8.2E-3   | 1.0E0     |
| <input type="checkbox"/> | GOTERM_MF_ALL   | <a href="#">small protein conjugating enzyme activity</a>                  | RT |     | 8                      | 8.3E-3   | 8.2E-1    |
| <input type="checkbox"/> | GOTERM_BP_ALL   | <a href="#">ubiquitin cycle</a>                                            | RT |     | 18                     | 8.3E-3   | 1.0E0     |
| <input type="checkbox"/> | GOTERM_MF_ALL   | <a href="#">small conjugating protein ligase activity</a>                  | RT |     | 8                      | 9.4E-3   | 7.9E-1    |
| <input type="checkbox"/> | GOTERM_MF_ALL   | <a href="#">acid-amino acid ligase activity</a>                            | RT |     | 8                      | 1.7E-2   | 9.0E-1    |
| <input type="checkbox"/> | SP_PIR_KEYWORDS | <a href="#">Ubl conjugation pathway</a>                                    | RT |     | 14                     | 2.5E-2   | 7.9E-1    |
| <input type="checkbox"/> | KEGG_PATHWAY    | <a href="#">Ubiquitin mediated proteolysis</a>                             | RT |     | 8                      | 3.3E-2   | 6.9E-1    |
| <input type="checkbox"/> | GOTERM_MF_ALL   | <a href="#">ligase activity, forming carbon-nitrogen bonds</a>             | RT |     | 8                      | 4.6E-2   | 9.8E-1    |
| <input type="checkbox"/> | GOTERM_BP_ALL   | <a href="#">ubiquitin-dependent protein catabolic process</a>              | RT |     | 7                      | 4.7E-2   | 1.0E0     |
| <input type="checkbox"/> | GOTERM_BP_ALL   | <a href="#">modification-dependent macromolecule catabolic process</a>     | RT |     | 7                      | 5.2E-2   | 1.0E0     |
| <input type="checkbox"/> | GOTERM_BP_ALL   | <a href="#">modification-dependent protein catabolic process</a>           | RT |     | 7                      | 5.2E-2   | 1.0E0     |
| <input type="checkbox"/> | GOTERM_BP_ALL   | <a href="#">proteolysis involved in cellular protein catabolic process</a> | RT |     | 7                      | 5.6E-2   | 1.0E0     |
| <input type="checkbox"/> | GOTERM_BP_ALL   | <a href="#">cellular macromolecule catabolic process</a>                   | RT |     | 10                     | 5.7E-2   | 1.0E0     |
| <input type="checkbox"/> | GOTERM_BP_ALL   | <a href="#">cellular protein catabolic process</a>                         | RT |     | 7                      | 5.9E-2   | 1.0E0     |
| <input type="checkbox"/> | KEGG_PATHWAY    | <a href="#">Parkinson's disease</a>                                        | RT |     | 3                      | 9.1E-2   | 8.1E-1    |
| <input type="checkbox"/> | GOTERM_BP_ALL   | <a href="#">proteolysis</a>                                                | RT |     | 19                     | 1.1E-1   | 1.0E0     |
| <input type="checkbox"/> | UP_SEQ_FEATURE  | active site:Glycyl thioester intermediate                                  | RT |     | 3                      | 1.6E-1   | 1.0E0     |
| <input type="checkbox"/> | GOTERM_BP_ALL   | <a href="#">macromolecule catabolic process</a>                            | RT |     | 10                     | 1.8E-1   | 1.0E0     |

| <input type="checkbox"/> |                       |                                                                      |          |  |  |  |       |         |           |  |
|--------------------------|-----------------------|----------------------------------------------------------------------|----------|--|--|--|-------|---------|-----------|--|
| <input type="checkbox"/> | GOTERM_BP_ALL         | <a href="#">protein catabolic process</a>                            | RT       |  |  |  | 7     | 1.8E-1  | 1.0E0     |  |
| <input type="checkbox"/> | GOTERM_MF_ALL         | <a href="#">ligase activity</a>                                      | RT       |  |  |  | 10    | 1.9E-1  | 1.0E0     |  |
| <input type="checkbox"/> | SP_PIR_KEYWORDS       | <a href="#">ligase</a>                                               | RT       |  |  |  | 7     | 3.1E-1  | 1.0E0     |  |
| <input type="checkbox"/> | GOTERM_BP_ALL         | <a href="#">cellular catabolic process</a>                           | RT       |  |  |  | 11    | 3.6E-1  | 1.0E0     |  |
| <input type="checkbox"/> | GOTERM_BP_ALL         | <a href="#">biopolymer catabolic process</a>                         | RT       |  |  |  | 7     | 3.8E-1  | 1.0E0     |  |
| <input type="checkbox"/> | GOTERM_BP_ALL         | <a href="#">catabolic process</a>                                    | RT       |  |  |  | 12    | 5.5E-1  | 1.0E0     |  |
|                          | Annotation Cluster 9  | Enrichment Score: 1.28                                               | <b>G</b> |  |  |  | Count | P_Value | Benjamini |  |
| <input type="checkbox"/> | GOTERM_BP_ALL         | <a href="#">interaction with host</a>                                | RT       |  |  |  | 3     | 3.3E-3  | 1.0E0     |  |
| <input type="checkbox"/> | GOTERM_BP_ALL         | <a href="#">interspecies interaction between organisms</a>           | RT       |  |  |  | 3     | 1.7E-2  | 1.0E0     |  |
| <input type="checkbox"/> | GOTERM_BP_ALL         | <a href="#">symbiosis, encompassing mutualism through parasitism</a> | RT       |  |  |  | 3     | 1.7E-2  | 1.0E0     |  |
| <input type="checkbox"/> | GOTERM_BP_ALL         | <a href="#">viral reproductive process</a>                           | RT       |  |  |  | 3     | 3.8E-2  | 1.0E0     |  |
| <input type="checkbox"/> | GOTERM_BP_ALL         | <a href="#">viral reproduction</a>                                   | RT       |  |  |  | 3     | 5.2E-2  | 1.0E0     |  |
| <input type="checkbox"/> | GOTERM_BP_ALL         | <a href="#">reproductive process</a>                                 | RT       |  |  |  | 5     | 6.3E-1  | 1.0E0     |  |
| <input type="checkbox"/> | GOTERM_BP_ALL         | <a href="#">multi-organism process</a>                               | RT       |  |  |  | 3     | 9.1E-1  | 1.0E0     |  |
|                          | Annotation Cluster 10 | Enrichment Score: 1.24                                               | <b>G</b> |  |  |  | Count | P_Value | Benjamini |  |
| <input type="checkbox"/> | GOTERM_BP_ALL         | <a href="#">cell motility</a>                                        | RT       |  |  |  | 13    | 4.0E-2  | 1.0E0     |  |
| <input type="checkbox"/> | GOTERM_BP_ALL         | <a href="#">localization of cell</a>                                 | RT       |  |  |  | 13    | 4.0E-2  | 1.0E0     |  |
| <input type="checkbox"/> | GOTERM_BP_ALL         | <a href="#">cell migration</a>                                       | RT       |  |  |  | 10    | 1.2E-1  | 1.0E0     |  |
|                          | Annotation Cluster 11 | Enrichment Score: 1.24                                               | <b>G</b> |  |  |  | Count | P_Value | Benjamini |  |
| <input type="checkbox"/> | GOTERM_BP_ALL         | <a href="#">intracellular transport</a>                              | RT       |  |  |  | 23    | 7.7E-3  | 1.0E0     |  |
| <input type="checkbox"/> | GOTERM_BP_ALL         | <a href="#">cellular localization</a>                                | RT       |  |  |  | 25    | 3.2E-2  | 1.0E0     |  |
| <input type="checkbox"/> | GOTERM_BP_ALL         | <a href="#">cellular component organization and biogenesis</a>       | RT       |  |  |  | 59    | 3.5E-2  | 1.0E0     |  |
| <input type="checkbox"/> | GOTERM_BP_ALL         | <a href="#">establishment of cellular localization</a>               | RT       |  |  |  | 24    | 4.3E-2  | 1.0E0     |  |
| <input type="checkbox"/> | GOTERM_BP_ALL         | <a href="#">protein localization</a>                                 | RT       |  |  |  | 22    | 5.8E-2  | 1.0E0     |  |
| <input type="checkbox"/> | GOTERM_BP_ALL         | <a href="#">macromolecule localization</a>                           | RT       |  |  |  | 22    | 8.0E-2  | 1.0E0     |  |
| <input type="checkbox"/> | GOTERM_BP_ALL         | <a href="#">establishment of protein localization</a>                | RT       |  |  |  | 20    | 8.0E-2  | 1.0E0     |  |
| <input type="checkbox"/> | GOTERM_BP_ALL         | <a href="#">protein transport</a>                                    | RT       |  |  |  | 19    | 8.4E-2  | 1.0E0     |  |
| <input type="checkbox"/> | GOTERM_BP_ALL         | <a href="#">intracellular protein transport</a>                      | RT       |  |  |  | 13    | 1.1E-1  | 1.0E0     |  |
| <input type="checkbox"/> | SP_PIR_KEYWORDS       | <a href="#">protein transport</a>                                    | RT       |  |  |  | 10    | 3.1E-1  | 1.0E0     |  |
|                          | Annotation Cluster 12 | Enrichment Score: 1.2                                                | <b>G</b> |  |  |  | Count | P_Value | Benjamini |  |
| <input type="checkbox"/> | SP_PIR_KEYWORDS       | <a href="#">signal-anchor</a>                                        | RT       |  |  |  | 14    | 1.1E-2  | 6.8E-1    |  |
| <input type="checkbox"/> | SP_PIR_KEYWORDS       | <a href="#">golgi apparatus</a>                                      | RT       |  |  |  | 16    | 1.2E-2  | 6.5E-1    |  |
| <input type="checkbox"/> | KEGG_PATHWAY          | <a href="#">O-Glycan biosynthesis</a>                                | RT       |  |  |  | 4     | 2.1E-2  | 9.0E-1    |  |
| <input type="checkbox"/> | GOTERM_MF_ALL         | <a href="#">polypeptide N-acetylglucosaminyltransferase activity</a> | RT       |  |  |  | 3     | 2.6E-2  | 9.2E-1    |  |
| <input type="checkbox"/> | UP_SEQ_FEATURE        | region of interest:Catalytic subdomain A                             | RT       |  |  |  | 3     | 3.3E-2  | 1.0E0     |  |
| <input type="checkbox"/> | UP_SEQ_FEATURE        | region of interest:Catalytic subdomain B                             | RT       |  |  |  | 3     | 3.3E-2  | 1.0E0     |  |
| <input type="checkbox"/> | UP_SEQ_FEATURE        | domain:Ricin B-type lectin                                           | RT       |  |  |  | 3     | 3.8E-2  | 1.0E0     |  |
| <input type="checkbox"/> | UP_SEQ_FEATURE        | metal ion-binding site:Manganese                                     | RT       |  |  |  | 3     | 7.0E-2  | 1.0E0     |  |
| <input type="checkbox"/> | INTERPRO              | <a href="#">Ricin B lectin</a>                                       | RT       |  |  |  | 3     | 7.2E-2  | 1.0E0     |  |
| <input type="checkbox"/> | GOTERM_MF_ALL         | <a href="#">acetylglucosaminyltransferase activity</a>               | RT       |  |  |  | 3     | 7.4E-2  | 9.9E-1    |  |
| <input type="checkbox"/> | SP_PIR_KEYWORDS       | <a href="#">Manganese</a>                                            | RT       |  |  |  | 6     | 7.5E-2  | 9.3E-1    |  |
| <input type="checkbox"/> | SMART                 | <a href="#">RICIN</a>                                                | RT       |  |  |  | 3     | 7.6E-2  | 1.0E0     |  |
| <input type="checkbox"/> | GOTERM_MF_ALL         | <a href="#">manganese ion binding</a>                                | RT       |  |  |  | 6     | 8.7E-2  | 1.0E0     |  |
| <input type="checkbox"/> | GOTERM_MF_ALL         | <a href="#">UDP-glycosyltransferase activity</a>                     | RT       |  |  |  | 5     | 9.9E-2  | 1.0E0     |  |
| <input type="checkbox"/> | KEGG_PATHWAY          | <a href="#">Glycan structures - biosynthesis 1</a>                   | RT       |  |  |  | 6     | 1.2E-1  | 8.4E-1    |  |
| <input type="checkbox"/> | GOTERM_MF_ALL         | <a href="#">transferase activity, transferring glycosyl groups</a>   | RT       |  |  |  | 8     | 1.3E-1  | 1.0E0     |  |
| <input type="checkbox"/> | UP_SEQ_FEATURE        | topological domain:Luminal                                           | RT       |  |  |  | 9     | 1.4E-1  | 1.0E0     |  |
| <input type="checkbox"/> | GOTERM_MF_ALL         | <a href="#">transferase activity, transferring hexosyl groups</a>    | RT       |  |  |  | 5     | 3.0E-1  | 1.0E0     |  |

| <input type="checkbox"/> | SP_PIR_KEYWORDS       | <a href="#">glycosyltransferase</a>                            | <a href="#">RT</a> |  |  |  |  | 5     | 4.3E-1  | 1.0E0     |
|--------------------------|-----------------------|----------------------------------------------------------------|--------------------|--|--|--|--|-------|---------|-----------|
|                          | Annotation Cluster 13 | Enrichment Score: 1.19                                         | <b>G</b>           |  |  |  |  | Count | P_Value | Benjamini |
| <input type="checkbox"/> | GOTERM_BP_ALL         | <a href="#">response to stress</a>                             | <a href="#">RT</a> |  |  |  |  | 26    | 1.0E-2  | 1.0E0     |
| <input type="checkbox"/> | GOTERM_BP_ALL         | <a href="#">response to wounding</a>                           | <a href="#">RT</a> |  |  |  |  | 10    | 1.4E-1  | 1.0E0     |
| <input type="checkbox"/> | GOTERM_BP_ALL         | <a href="#">response to external stimulus</a>                  | <a href="#">RT</a> |  |  |  |  | 13    | 2.0E-1  | 1.0E0     |
|                          | Annotation Cluster 14 | Enrichment Score: 1.17                                         | <b>G</b>           |  |  |  |  | Count | P_Value | Benjamini |
| <input type="checkbox"/> | GOTERM_CC_ALL         | <a href="#">cell fraction</a>                                  | <a href="#">RT</a> |  |  |  |  | 19    | 1.3E-2  | 6.2E-1    |
| <input type="checkbox"/> | GOTERM_CC_ALL         | <a href="#">membrane fraction</a>                              | <a href="#">RT</a> |  |  |  |  | 15    | 6.5E-2  | 9.2E-1    |
| <input type="checkbox"/> | GOTERM_CC_ALL         | <a href="#">microsome</a>                                      | <a href="#">RT</a> |  |  |  |  | 7     | 7.7E-2  | 9.3E-1    |
| <input type="checkbox"/> | GOTERM_CC_ALL         | <a href="#">vesicular fraction</a>                             | <a href="#">RT</a> |  |  |  |  | 7     | 8.6E-2  | 9.3E-1    |
| <input type="checkbox"/> | SP_PIR_KEYWORDS       | <a href="#">microsome</a>                                      | <a href="#">RT</a> |  |  |  |  | 4     | 2.7E-1  | 1.0E0     |
|                          | Annotation Cluster 15 | Enrichment Score: 1.14                                         | <b>G</b>           |  |  |  |  | Count | P_Value | Benjamini |
| <input type="checkbox"/> | INTERPRO              | <a href="#">CD9/CD37/CD63 antigen</a>                          | <a href="#">RT</a> |  |  |  |  | 4     | 1.6E-2  | 1.0E0     |
| <input type="checkbox"/> | PIR_SUPERFAMILY       | PIRSF002419:CD9 antigen                                        | <a href="#">RT</a> |  |  |  |  | 3     | 3.9E-2  | 1.0E0     |
| <input type="checkbox"/> | GOTERM_BP_ALL         | <a href="#">reproductive process</a>                           | <a href="#">RT</a> |  |  |  |  | 5     | 6.3E-1  | 1.0E0     |
|                          | Annotation Cluster 16 | Enrichment Score: 1.06                                         | <b>G</b>           |  |  |  |  | Count | P_Value | Benjamini |
| <input type="checkbox"/> | SP_PIR_KEYWORDS       | <a href="#">actin-binding</a>                                  | <a href="#">RT</a> |  |  |  |  | 8     | 4.3E-2  | 9.0E-1    |
| <input type="checkbox"/> | GOTERM_CC_ALL         | <a href="#">actin cytoskeleton</a>                             | <a href="#">RT</a> |  |  |  |  | 9     | 4.4E-2  | 9.0E-1    |
| <input type="checkbox"/> | GOTERM_MF_ALL         | <a href="#">cytoskeletal protein binding</a>                   | <a href="#">RT</a> |  |  |  |  | 13    | 4.9E-2  | 9.8E-1    |
| <input type="checkbox"/> | GOTERM_MF_ALL         | <a href="#">actin binding</a>                                  | <a href="#">RT</a> |  |  |  |  | 10    | 5.8E-2  | 9.9E-1    |
| <input type="checkbox"/> | SP_PIR_KEYWORDS       | <a href="#">cytoskeleton</a>                                   | <a href="#">RT</a> |  |  |  |  | 10    | 1.1E-1  | 9.7E-1    |
| <input type="checkbox"/> | GOTERM_BP_ALL         | <a href="#">actin cytoskeleton organization and biogenesis</a> | <a href="#">RT</a> |  |  |  |  | 7     | 1.5E-1  | 1.0E0     |
| <input type="checkbox"/> | GOTERM_BP_ALL         | <a href="#">actin filament-based process</a>                   | <a href="#">RT</a> |  |  |  |  | 7     | 1.8E-1  | 1.0E0     |
| <input type="checkbox"/> | GOTERM_BP_ALL         | <a href="#">cytoskeleton organization and biogenesis</a>       | <a href="#">RT</a> |  |  |  |  | 13    | 2.1E-1  | 1.0E0     |
|                          | Annotation Cluster 17 | Enrichment Score: 1.05                                         | <b>G</b>           |  |  |  |  | Count | P_Value | Benjamini |
| <input type="checkbox"/> | GOTERM_MF_ALL         | <a href="#">guanyl nucleotide binding</a>                      | <a href="#">RT</a> |  |  |  |  | 14    | 8.5E-3  | 8.0E-1    |
| <input type="checkbox"/> | GOTERM_MF_ALL         | <a href="#">guanyl ribonucleotide binding</a>                  | <a href="#">RT</a> |  |  |  |  | 14    | 8.5E-3  | 8.0E-1    |
| <input type="checkbox"/> | SP_PIR_KEYWORDS       | <a href="#">GTP-binding</a>                                    | <a href="#">RT</a> |  |  |  |  | 12    | 1.3E-2  | 6.5E-1    |
| <input type="checkbox"/> | GOTERM_MF_ALL         | <a href="#">GTP binding</a>                                    | <a href="#">RT</a> |  |  |  |  | 13    | 1.7E-2  | 8.9E-1    |
| <input type="checkbox"/> | UP_SEQ_FEATURE        | nucleotide phosphate-binding region:GTP                        | <a href="#">RT</a> |  |  |  |  | 9     | 5.8E-2  | 1.0E0     |
| <input type="checkbox"/> | INTERPRO              | <a href="#">Small GTP-binding protein domain</a>               | <a href="#">RT</a> |  |  |  |  | 6     | 1.1E-1  | 1.0E0     |
| <input type="checkbox"/> | INTERPRO              | <a href="#">Ras GTPase</a>                                     | <a href="#">RT</a> |  |  |  |  | 6     | 1.1E-1  | 1.0E0     |
| <input type="checkbox"/> | GOTERM_BP_ALL         | <a href="#">small GTPase mediated signal transduction</a>      | <a href="#">RT</a> |  |  |  |  | 11    | 2.0E-1  | 1.0E0     |
| <input type="checkbox"/> | SP_PIR_KEYWORDS       | <a href="#">prenylation</a>                                    | <a href="#">RT</a> |  |  |  |  | 5     | 2.5E-1  | 1.0E0     |
| <input type="checkbox"/> | INTERPRO              | <a href="#">Ras</a>                                            | <a href="#">RT</a> |  |  |  |  | 4     | 3.3E-1  | 1.0E0     |
| <input type="checkbox"/> | SP_PIR_KEYWORDS       | <a href="#">lipoprotein</a>                                    | <a href="#">RT</a> |  |  |  |  | 13    | 3.4E-1  | 1.0E0     |
| <input type="checkbox"/> | UP_SEQ_FEATURE        | short sequence motif:Effector region                           | <a href="#">RT</a> |  |  |  |  | 3     | 5.1E-1  | 1.0E0     |
| <input type="checkbox"/> | UP_SEQ_FEATURE        | lipid moiety-binding region:S-geranylgeranyl cysteine          | <a href="#">RT</a> |  |  |  |  | 3     | 5.4E-1  | 1.0E0     |
|                          | Annotation Cluster 18 | Enrichment Score: 1.05                                         | <b>G</b>           |  |  |  |  | Count | P_Value | Benjamini |
| <input type="checkbox"/> | SP_PIR_KEYWORDS       | <a href="#">nucleotide-binding</a>                             | <a href="#">RT</a> |  |  |  |  | 37    | 1.1E-2  | 6.5E-1    |
| <input type="checkbox"/> | GOTERM_MF_ALL         | <a href="#">ribonucleotide binding</a>                         | <a href="#">RT</a> |  |  |  |  | 40    | 5.3E-2  | 9.8E-1    |
| <input type="checkbox"/> | GOTERM_MF_ALL         | <a href="#">purine ribonucleotide binding</a>                  | <a href="#">RT</a> |  |  |  |  | 40    | 5.3E-2  | 9.8E-1    |
| <input type="checkbox"/> | GOTERM_MF_ALL         | <a href="#">purine nucleotide binding</a>                      | <a href="#">RT</a> |  |  |  |  | 41    | 6.0E-2  | 9.8E-1    |
| <input type="checkbox"/> | GOTERM_MF_ALL         | <a href="#">nucleotide binding</a>                             | <a href="#">RT</a> |  |  |  |  | 44    | 1.1E-1  | 1.0E0     |
| <input type="checkbox"/> | GOTERM_MF_ALL         | <a href="#">ATP binding</a>                                    | <a href="#">RT</a> |  |  |  |  | 31    | 1.3E-1  | 1.0E0     |
| <input type="checkbox"/> | SP_PIR_KEYWORDS       | <a href="#">atp-binding</a>                                    | <a href="#">RT</a> |  |  |  |  | 25    | 1.4E-1  | 9.8E-1    |
| <input type="checkbox"/> | GOTERM_MF_ALL         | <a href="#">adenyl ribonucleotide binding</a>                  | <a href="#">RT</a> |  |  |  |  | 31    | 1.5E-1  | 1.0E0     |
| <input type="checkbox"/> | GOTERM_MF_ALL         | <a href="#">adenyl nucleotide binding</a>                      | <a href="#">RT</a> |  |  |  |  | 32    | 1.6E-1  | 1.0E0     |
| <input type="checkbox"/> | UP_SEQ_FEATURE        | nucleotide phosphate-binding region:ATP                        | <a href="#">RT</a> |  |  |  |  | 15    | 3.6E-1  | 1.0E0     |

| Annotation Cluster 19    |                 | Enrichment Score: 1.04                                                                             |    | G                                                                                   |    | Count | P_Value | Benjamini |
|--------------------------|-----------------|----------------------------------------------------------------------------------------------------|----|-------------------------------------------------------------------------------------|---------------------------------------------------------------------------------------|-------|---------|-----------|
| <input type="checkbox"/> | SP_PIR_KEYWORDS | <a href="#">cell adhesion</a>                                                                      | RT |    |                                                                                       | 12    | 5.6E-2  | 9.0E-1    |
| <input type="checkbox"/> | GOTERM_BP_ALL   | <a href="#">biological adhesion</a>                                                                | RT |    |                                                                                       | 18    | 1.2E-1  | 1.0E0     |
| <input type="checkbox"/> | GOTERM_BP_ALL   | <a href="#">cell adhesion</a>                                                                      | RT |    |                                                                                       | 18    | 1.2E-1  | 1.0E0     |
| Annotation Cluster 20    |                 | Enrichment Score: 1.04                                                                             |    | G                                                                                   |    | Count | P_Value | Benjamini |
| <input type="checkbox"/> | GOTERM_BP_ALL   | <a href="#">cellular component assembly</a>                                                        | RT |    |                                                                                       | 13    | 7.4E-2  | 1.0E0     |
| <input type="checkbox"/> | GOTERM_BP_ALL   | <a href="#">protein complex assembly</a>                                                           | RT |    |                                                                                       | 7     | 9.4E-2  | 1.0E0     |
| <input type="checkbox"/> | GOTERM_BP_ALL   | <a href="#">macromolecular complex assembly</a>                                                    | RT |    |                                                                                       | 11    | 1.1E-1  | 1.0E0     |
| Annotation Cluster 21    |                 | Enrichment Score: 1.02                                                                             |    | G                                                                                   |    | Count | P_Value | Benjamini |
| <input type="checkbox"/> | KEGG_PATHWAY    | <a href="#">Chronic myeloid leukemia</a>                                                           | RT |    |                                                                                       | 7     | 9.9E-3  | 8.8E-1    |
| <input type="checkbox"/> | GOTERM_BP_ALL   | <a href="#">ER-nuclear signaling pathway</a>                                                       | RT |    |                                                                                       | 4     | 1.2E-2  | 1.0E0     |
| <input type="checkbox"/> | BIOCARTA        | <a href="#">p53 Signaling Pathway</a>                                                              | RT |    |                                                                                       | 4     | 1.3E-2  | 9.8E-1    |
| <input type="checkbox"/> | KEGG_PATHWAY    | <a href="#">Pancreatic cancer</a>                                                                  | RT |    |                                                                                       | 6     | 3.2E-2  | 7.4E-1    |
| <input type="checkbox"/> | KEGG_PATHWAY    | <a href="#">Renal cell carcinoma</a>                                                               | RT |    |                                                                                       | 6     | 3.2E-2  | 7.4E-1    |
| <input type="checkbox"/> | GOTERM_BP_ALL   | <a href="#">unfolded protein response</a>                                                          | RT |    |                                                                                       | 3     | 4.3E-2  | 1.0E0     |
| <input type="checkbox"/> | KEGG_PATHWAY    | <a href="#">Cell cycle</a>                                                                         | RT |    |                                                                                       | 7     | 4.4E-2  | 7.4E-1    |
| <input type="checkbox"/> | BIOCARTA        | <a href="#">Cell Cycle</a>                                                                         | RT |    |                                                                                       | 4     | 4.5E-2  | 1.0E0     |
| <input type="checkbox"/> | KEGG_PATHWAY    | <a href="#">Colorectal cancer</a>                                                                  | RT |    |                                                                                       | 6     | 4.8E-2  | 7.2E-1    |
| <input type="checkbox"/> | BIOCARTA        | <a href="#">BTG family proteins and cell cycle regulation</a>                                      | RT |    |                                                                                       | 3     | 5.6E-2  | 1.0E0     |
| <input type="checkbox"/> | KEGG_PATHWAY    | <a href="#">Glioma</a>                                                                             | RT |    |                                                                                       | 5     | 5.9E-2  | 7.6E-1    |
| <input type="checkbox"/> | KEGG_PATHWAY    | <a href="#">p53 signaling pathway</a>                                                              | RT |    |                                                                                       | 5     | 6.5E-2  | 7.6E-1    |
| <input type="checkbox"/> | KEGG_PATHWAY    | <a href="#">Small cell lung cancer</a>                                                             | RT |    |                                                                                       | 6     | 7.2E-2  | 7.6E-1    |
| <input type="checkbox"/> | KEGG_PATHWAY    | <a href="#">Bladder cancer</a>                                                                     | RT |    |                                                                                       | 4     | 9.4E-2  | 8.0E-1    |
| <input type="checkbox"/> | KEGG_PATHWAY    | <a href="#">Wnt signaling pathway</a>                                                              | RT |    |                                                                                       | 7     | 1.3E-1  | 8.6E-1    |
| <input type="checkbox"/> | KEGG_PATHWAY    | <a href="#">Endometrial cancer</a>                                                                 | RT |  |                                                                                       | 4     | 1.3E-1  | 8.5E-1    |
| <input type="checkbox"/> | GOTERM_BP_ALL   | <a href="#">response to protein stimulus</a>                                                       | RT |  |                                                                                       | 4     | 1.3E-1  | 1.0E0     |
| <input type="checkbox"/> | GOTERM_BP_ALL   | <a href="#">response to unfolded protein</a>                                                       | RT |  |                                                                                       | 4     | 1.3E-1  | 1.0E0     |
| <input type="checkbox"/> | KEGG_PATHWAY    | <a href="#">Non-small cell lung cancer</a>                                                         | RT |  |                                                                                       | 4     | 1.5E-1  | 8.7E-1    |
| <input type="checkbox"/> | KEGG_PATHWAY    | <a href="#">Thyroid cancer</a>                                                                     | RT |  |                                                                                       | 3     | 1.6E-1  | 8.7E-1    |
| <input type="checkbox"/> | KEGG_PATHWAY    | <a href="#">Prostate cancer</a>                                                                    | RT |  |                                                                                       | 5     | 1.8E-1  | 8.8E-1    |
| <input type="checkbox"/> | KEGG_PATHWAY    | <a href="#">Focal adhesion</a>                                                                     | RT |  |                                                                                       | 8     | 2.0E-1  | 8.9E-1    |
| <input type="checkbox"/> | KEGG_PATHWAY    | <a href="#">Melanoma</a>                                                                           | RT |  |                                                                                       | 4     | 2.5E-1  | 9.2E-1    |
| <input type="checkbox"/> | KEGG_PATHWAY    | <a href="#">Regulation of actin cytoskeleton</a>                                                   | RT |  |                                                                                       | 7     | 3.9E-1  | 9.8E-1    |
| <input type="checkbox"/> | KEGG_PATHWAY    | <a href="#">Acute myeloid leukemia</a>                                                             | RT |  |                                                                                       | 3     | 4.3E-1  | 9.9E-1    |
| <input type="checkbox"/> | KEGG_PATHWAY    | <a href="#">ErbB signaling pathway</a>                                                             | RT |  |                                                                                       | 3     | 6.2E-1  | 1.0E0     |
| <input type="checkbox"/> | GOTERM_BP_ALL   | <a href="#">response to biotic stimulus</a>                                                        | RT |  |                                                                                       | 5     | 6.2E-1  | 1.0E0     |
| <input type="checkbox"/> | KEGG_PATHWAY    | <a href="#">Jak-STAT signaling pathway</a>                                                         | RT |  |                                                                                       | 4     | 7.2E-1  | 1.0E0     |
| Annotation Cluster 22    |                 | Enrichment Score: 1.01                                                                             |    | G                                                                                   |  | Count | P_Value | Benjamini |
| <input type="checkbox"/> | GOTERM_MF_ALL   | <a href="#">GTPase activity</a>                                                                    | RT |  |                                                                                       | 8     | 1.9E-2  | 9.0E-1    |
| <input type="checkbox"/> | GOTERM_CC_ALL   | <a href="#">heterotrimeric G-protein complex</a>                                                   | RT |  |                                                                                       | 4     | 3.3E-2  | 8.6E-1    |
| <input type="checkbox"/> | GOTERM_CC_ALL   | <a href="#">extrinsic to plasma membrane</a>                                                       | RT |  |                                                                                       | 4     | 9.2E-2  | 9.3E-1    |
| <input type="checkbox"/> | GOTERM_CC_ALL   | <a href="#">extrinsic to membrane</a>                                                              | RT |  |                                                                                       | 4     | 1.8E-1  | 9.8E-1    |
| <input type="checkbox"/> | SP_PIR_KEYWORDS | <a href="#">transducer</a>                                                                         | RT |  |                                                                                       | 6     | 8.8E-1  | 1.0E0     |
| Annotation Cluster 23    |                 | Enrichment Score: 1                                                                                |    | G                                                                                   |  | Count | P_Value | Benjamini |
| <input type="checkbox"/> | GOTERM_MF_ALL   | <a href="#">nucleoside-triphosphatase activity</a>                                                 | RT |  |                                                                                       | 21    | 1.3E-3  | 7.0E-1    |
| <input type="checkbox"/> | GOTERM_MF_ALL   | <a href="#">pyrophosphatase activity</a>                                                           | RT |  |                                                                                       | 21    | 2.3E-3  | 7.0E-1    |
| <input type="checkbox"/> | GOTERM_MF_ALL   | <a href="#">hydrolase activity, acting on acid anhydrides, in phosphorus-containing anhydrides</a> | RT |  |                                                                                       | 21    | 2.5E-3  | 6.7E-1    |
| <input type="checkbox"/> | GOTERM_MF_ALL   | <a href="#">hydrolase activity, acting on acid anhydrides</a>                                      | RT |  |                                                                                       | 21    | 2.7E-3  | 6.4E-1    |

|                          |                 |                                                                                                                |                    |  |    |        |        |
|--------------------------|-----------------|----------------------------------------------------------------------------------------------------------------|--------------------|--|----|--------|--------|
| <input type="checkbox"/> | GOTERM_MF_ALL   | <a href="#">active transmembrane transporter activity</a>                                                      | <a href="#">RT</a> |  | 15 | 4.3E-3 | 7.7E-1 |
| <input type="checkbox"/> | GOTERM_MF_ALL   | <a href="#">P-P-bond-hydrolysis-driven transmembrane transporter activity</a>                                  | <a href="#">RT</a> |  | 9  | 6.0E-3 | 8.0E-1 |
| <input type="checkbox"/> | GOTERM_MF_ALL   | <a href="#">primary active transmembrane transporter activity</a>                                              | <a href="#">RT</a> |  | 9  | 6.0E-3 | 8.0E-1 |
| <input type="checkbox"/> | GOTERM_CC_ALL   | <a href="#">proton-transporting ATP synthase complex, catalytic core F(1)</a>                                  | <a href="#">RT</a> |  | 3  | 8.9E-3 | 7.5E-1 |
| <input type="checkbox"/> | GOTERM_CC_ALL   | <a href="#">proton-transporting two-sector ATPase complex, catalytic domain</a>                                | <a href="#">RT</a> |  | 3  | 1.1E-2 | 7.1E-1 |
| <input type="checkbox"/> | GOTERM_MF_ALL   | <a href="#">ATPase activity, coupled to movement of substances</a>                                             | <a href="#">RT</a> |  | 8  | 1.2E-2 | 8.5E-1 |
| <input type="checkbox"/> | GOTERM_MF_ALL   | <a href="#">ATPase activity, coupled to transmembrane movement of substances</a>                               | <a href="#">RT</a> |  | 8  | 1.2E-2 | 8.5E-1 |
| <input type="checkbox"/> | GOTERM_MF_ALL   | <a href="#">hydrolase activity, acting on acid anhydrides, catalyzing transmembrane movement of substances</a> | <a href="#">RT</a> |  | 8  | 1.3E-2 | 8.5E-1 |
| <input type="checkbox"/> | GOTERM_MF_ALL   | <a href="#">GTPase activity</a>                                                                                | <a href="#">RT</a> |  | 8  | 1.9E-2 | 9.0E-1 |
| <input type="checkbox"/> | GOTERM_MF_ALL   | <a href="#">cation-transporting ATPase activity</a>                                                            | <a href="#">RT</a> |  | 5  | 2.0E-2 | 8.9E-1 |
| <input type="checkbox"/> | GOTERM_MF_ALL   | <a href="#">ATPase activity, coupled to transmembrane movement of ions</a>                                     | <a href="#">RT</a> |  | 6  | 3.0E-2 | 9.4E-1 |
| <input type="checkbox"/> | GOTERM_BP_ALL   | <a href="#">localization</a>                                                                                   | <a href="#">RT</a> |  | 66 | 4.2E-2 | 1.0E0  |
| <input type="checkbox"/> | GOTERM_BP_ALL   | <a href="#">proton transport</a>                                                                               | <a href="#">RT</a> |  | 5  | 4.4E-2 | 1.0E0  |
| <input type="checkbox"/> | GOTERM_BP_ALL   | <a href="#">ATP synthesis coupled proton transport</a>                                                         | <a href="#">RT</a> |  | 4  | 4.4E-2 | 1.0E0  |
| <input type="checkbox"/> | GOTERM_MF_ALL   | <a href="#">hydrogen ion transporting ATP synthase activity, rotational mechanism</a>                          | <a href="#">RT</a> |  | 4  | 5.0E-2 | 9.8E-1 |
| <input type="checkbox"/> | GOTERM_CC_ALL   | <a href="#">proton-transporting ATP synthase complex</a>                                                       | <a href="#">RT</a> |  | 3  | 5.2E-2 | 9.2E-1 |
| <input type="checkbox"/> | GOTERM_MF_ALL   | <a href="#">hydrogen ion transporting ATPase activity, rotational mechanism</a>                                | <a href="#">RT</a> |  | 4  | 5.3E-2 | 9.8E-1 |
| <input type="checkbox"/> | GOTERM_BP_ALL   | <a href="#">nucleoside phosphate metabolic process</a>                                                         | <a href="#">RT</a> |  | 4  | 5.5E-2 | 1.0E0  |
| <input type="checkbox"/> | GOTERM_BP_ALL   | <a href="#">ATP biosynthetic process</a>                                                                       | <a href="#">RT</a> |  | 4  | 5.5E-2 | 1.0E0  |
| <input type="checkbox"/> | GOTERM_BP_ALL   | <a href="#">hydrogen transport</a>                                                                             | <a href="#">RT</a> |  | 5  | 5.6E-2 | 1.0E0  |
| <input type="checkbox"/> | GOTERM_MF_ALL   | <a href="#">ATPase activity, coupled</a>                                                                       | <a href="#">RT</a> |  | 10 | 5.9E-2 | 9.8E-1 |
| <input type="checkbox"/> | GOTERM_MF_ALL   | <a href="#">ATPase activity</a>                                                                                | <a href="#">RT</a> |  | 11 | 6.3E-2 | 9.9E-1 |
| <input type="checkbox"/> | GOTERM_CC_ALL   | <a href="#">proton-transporting two-sector ATPase complex</a>                                                  | <a href="#">RT</a> |  | 4  | 6.5E-2 | 9.3E-1 |
| <input type="checkbox"/> | SP_PIR_KEYWORDS | <a href="#">transport</a>                                                                                      | <a href="#">RT</a> |  | 32 | 6.9E-2 | 9.2E-1 |
| <input type="checkbox"/> | GOTERM_BP_ALL   | <a href="#">ATP metabolic process</a>                                                                          | <a href="#">RT</a> |  | 4  | 7.0E-2 | 1.0E0  |
| <input type="checkbox"/> | SP_PIR_KEYWORDS | <a href="#">ATP synthesis</a>                                                                                  | <a href="#">RT</a> |  | 3  | 8.2E-2 | 9.4E-1 |
| <input type="checkbox"/> | GOTERM_BP_ALL   | <a href="#">purine ribonucleoside triphosphate biosynthetic process</a>                                        | <a href="#">RT</a> |  | 4  | 8.7E-2 | 1.0E0  |
| <input type="checkbox"/> | GOTERM_BP_ALL   | <a href="#">purine nucleoside triphosphate biosynthetic process</a>                                            | <a href="#">RT</a> |  | 4  | 8.7E-2 | 1.0E0  |
| <input type="checkbox"/> | GOTERM_BP_ALL   | <a href="#">ribonucleoside triphosphate biosynthetic process</a>                                               | <a href="#">RT</a> |  | 4  | 9.1E-2 | 1.0E0  |
| <input type="checkbox"/> | GOTERM_BP_ALL   | <a href="#">oxidative phosphorylation</a>                                                                      | <a href="#">RT</a> |  | 4  | 9.5E-2 | 1.0E0  |
| <input type="checkbox"/> | GOTERM_BP_ALL   | <a href="#">purine ribonucleoside triphosphate metabolic process</a>                                           | <a href="#">RT</a> |  | 4  | 1.1E-1 | 1.0E0  |
| <input type="checkbox"/> | GOTERM_BP_ALL   | <a href="#">nucleoside triphosphate biosynthetic process</a>                                                   | <a href="#">RT</a> |  | 4  | 1.1E-1 | 1.0E0  |
| <input type="checkbox"/> | GOTERM_BP_ALL   | <a href="#">ribonucleoside triphosphate metabolic process</a>                                                  | <a href="#">RT</a> |  | 4  | 1.1E-1 | 1.0E0  |
| <input type="checkbox"/> | GOTERM_BP_ALL   | <a href="#">purine nucleoside triphosphate metabolic process</a>                                               | <a href="#">RT</a> |  | 4  | 1.1E-1 | 1.0E0  |
| <input type="checkbox"/> | GOTERM_MF_ALL   | <a href="#">symporter activity</a>                                                                             | <a href="#">RT</a> |  | 6  | 1.2E-1 | 1.0E0  |
| <input type="checkbox"/> | GOTERM_BP_ALL   | <a href="#">purine ribonucleotide biosynthetic process</a>                                                     | <a href="#">RT</a> |  | 4  | 1.4E-1 | 1.0E0  |
| <input type="checkbox"/> | GOTERM_BP_ALL   | <a href="#">nucleoside triphosphate metabolic process</a>                                                      | <a href="#">RT</a> |  | 4  | 1.5E-1 | 1.0E0  |
| <input type="checkbox"/> | GOTERM_BP_ALL   | <a href="#">cofactor biosynthetic process</a>                                                                  | <a href="#">RT</a> |  | 5  | 1.6E-1 | 1.0E0  |
| <input type="checkbox"/> | GOTERM_BP_ALL   | <a href="#">transport</a>                                                                                      | <a href="#">RT</a> |  | 53 | 1.7E-1 | 1.0E0  |
| <input type="checkbox"/> | GOTERM_BP_ALL   | <a href="#">ribonucleotide biosynthetic process</a>                                                            | <a href="#">RT</a> |  | 4  | 1.7E-1 | 1.0E0  |
| <input type="checkbox"/> | GOTERM_BP_ALL   | <a href="#">purine ribonucleotide metabolic process</a>                                                        | <a href="#">RT</a> |  | 4  | 1.7E-1 | 1.0E0  |
| <input type="checkbox"/> | GOTERM_BP_ALL   | <a href="#">purine nucleotide biosynthetic process</a>                                                         | <a href="#">RT</a> |  | 4  | 1.8E-1 | 1.0E0  |



|                          |                 |                                                                                                       |                    |  |                        |          |        |
|--------------------------|-----------------|-------------------------------------------------------------------------------------------------------|--------------------|--|------------------------|----------|--------|
| <input type="checkbox"/> | GOTERM_BP_ALL   | <a href="#">establishment of localization</a>                                                         | <a href="#">RT</a> |  | 54                     | 1.9E-1   | 1.0E0  |
| <input type="checkbox"/> | SP_PIR_KEYWORDS | <a href="#">hydrogen ion transport</a>                                                                | <a href="#">RT</a> |  | 3                      | 1.9E-1   | 9.9E-1 |
| <input type="checkbox"/> | GOTERM_MF_ALL   | <a href="#">substrate-specific transporter activity</a>                                               | <a href="#">RT</a> |  | 22                     | 2.0E-1   | 1.0E0  |
| <input type="checkbox"/> | SP_PIR_KEYWORDS | <a href="#">Symport</a>                                                                               | <a href="#">RT</a> |  | 4                      | 2.1E-1   | 9.9E-1 |
| <input type="checkbox"/> | GOTERM_BP_ALL   | <a href="#">cofactor metabolic process</a>                                                            | <a href="#">RT</a> |  | 7                      | 2.1E-1   | 1.0E0  |
| <input type="checkbox"/> | GOTERM_BP_ALL   | <a href="#">ribonucleotide metabolic process</a>                                                      | <a href="#">RT</a> |  | 4                      | 2.2E-1   | 1.0E0  |
| <input type="checkbox"/> | GOTERM_BP_ALL   | <a href="#">purine nucleotide metabolic process</a>                                                   | <a href="#">RT</a> |  | 4                      | 2.3E-1   | 1.0E0  |
| <input type="checkbox"/> | GOTERM_MF_ALL   | <a href="#">hydrolase activity</a>                                                                    | <a href="#">RT</a> |  | 44                     | 2.4E-1   | 1.0E0  |
| <input type="checkbox"/> | GOTERM_MF_ALL   | <a href="#">secondary active transmembrane transporter activity</a>                                   | <a href="#">RT</a> |  | 6                      | 2.5E-1   | 1.0E0  |
| <input type="checkbox"/> | GOTERM_BP_ALL   | <a href="#">coenzyme biosynthetic process</a>                                                         | <a href="#">RT</a> |  | 4                      | 2.7E-1   | 1.0E0  |
| <input type="checkbox"/> | GOTERM_MF_ALL   | <a href="#">inorganic cation transmembrane transporter activity</a>                                   | <a href="#">RT</a> |  | 5                      | 2.8E-1   | 1.0E0  |
| <input type="checkbox"/> | GOTERM_MF_ALL   | <a href="#">transporter activity</a>                                                                  | <a href="#">RT</a> |  | 27                     | 3.0E-1   | 1.0E0  |
| <input type="checkbox"/> | GOTERM_MF_ALL   | <a href="#">hydrogen ion transmembrane transporter activity</a>                                       | <a href="#">RT</a> |  | 4                      | 3.1E-1   | 1.0E0  |
| <input type="checkbox"/> | GOTERM_MF_ALL   | <a href="#">monovalent inorganic cation transmembrane transporter activity</a>                        | <a href="#">RT</a> |  | 4                      | 3.3E-1   | 1.0E0  |
| <input type="checkbox"/> | GOTERM_MF_ALL   | <a href="#">ATPase activity, coupled to transmembrane movement of ions, phosphorylative mechanism</a> | <a href="#">RT</a> |  | 3                      | 3.4E-1   | 1.0E0  |
| <input type="checkbox"/> | GOTERM_BP_ALL   | <a href="#">coenzyme metabolic process</a>                                                            | <a href="#">RT</a> |  | 5                      | 4.1E-1   | 1.0E0  |
| <input type="checkbox"/> | GOTERM_MF_ALL   | <a href="#">substrate-specific transmembrane transporter activity</a>                                 | <a href="#">RT</a> |  | 15                     | 4.8E-1   | 1.0E0  |
| <input type="checkbox"/> | GOTERM_BP_ALL   | <a href="#">nucleotide biosynthetic process</a>                                                       | <a href="#">RT</a> |  | 4                      | 4.9E-1   | 1.0E0  |
| <input type="checkbox"/> | GOTERM_MF_ALL   | <a href="#">transmembrane transporter activity</a>                                                    | <a href="#">RT</a> |  | 17                     | 5.0E-1   | 1.0E0  |
| <input type="checkbox"/> | GOTERM_BP_ALL   | <a href="#">monovalent inorganic cation transport</a>                                                 | <a href="#">RT</a> |  | 6                      | 6.7E-1   | 1.0E0  |
| <input type="checkbox"/> | GOTERM_BP_ALL   | <a href="#">cation transport</a>                                                                      | <a href="#">RT</a> |  | 9                      | 6.9E-1   | 1.0E0  |
| <input type="checkbox"/> | GOTERM_MF_ALL   | <a href="#">ion transmembrane transporter activity</a>                                                | <a href="#">RT</a> |  | 11                     | 7.1E-1   | 1.0E0  |
| <input type="checkbox"/> | GOTERM_BP_ALL   | <a href="#">nucleotide metabolic process</a>                                                          | <a href="#">RT</a> |  | 4                      | 7.4E-1   | 1.0E0  |
| <input type="checkbox"/> | GOTERM_BP_ALL   | <a href="#">generation of precursor metabolites and energy</a>                                        | <a href="#">RT</a> |  | 9                      | 7.5E-1   | 1.0E0  |
| <input type="checkbox"/> | KEGG_PATHWAY    | <a href="#">Oxidative phosphorylation</a>                                                             | <a href="#">RT</a> |  | 3                      | 7.6E-1   | 1.0E0  |
| <input type="checkbox"/> | GOTERM_MF_ALL   | <a href="#">cation transmembrane transporter activity</a>                                             | <a href="#">RT</a> |  | 8                      | 7.6E-1   | 1.0E0  |
| <input type="checkbox"/> | GOTERM_BP_ALL   | <a href="#">nucleobase, nucleoside and nucleotide metabolic process</a>                               | <a href="#">RT</a> |  | 4                      | 7.7E-1   | 1.0E0  |
| <input type="checkbox"/> | SP_PIR_KEYWORDS | <a href="#">ion transport</a>                                                                         | <a href="#">RT</a> |  | 7                      | 8.3E-1   | 1.0E0  |
| <input type="checkbox"/> | GOTERM_BP_ALL   | <a href="#">ion transport</a>                                                                         | <a href="#">RT</a> |  | 11                     | 8.7E-1   | 1.0E0  |
| <input type="checkbox"/> | GOTERM_MF_ALL   | <a href="#">metal ion transmembrane transporter activity</a>                                          | <a href="#">RT</a> |  | 3                      | 9.7E-1   | 1.0E0  |
| <input type="checkbox"/> | GOTERM_BP_ALL   | <a href="#">metal ion transport</a>                                                                   | <a href="#">RT</a> |  | 4                      | 9.8E-1   | 1.0E0  |
| Annotation Cluster 24    |                 |                                                                                                       |                    |  | Enrichment Score: 0.99 | <b>G</b> |        |
| <input type="checkbox"/> | KEGG_PATHWAY    | <a href="#">Huntington's disease</a>                                                                  | <a href="#">RT</a> |  | 4                      | 2.6E-2   | 8.4E-1 |
| <input type="checkbox"/> | GOTERM_BP_ALL   | <a href="#">anti-apoptosis</a>                                                                        | <a href="#">RT</a> |  | 6                      | 4.4E-2   | 1.0E0  |
| <input type="checkbox"/> | GOTERM_BP_ALL   | <a href="#">death</a>                                                                                 | <a href="#">RT</a> |  | 21                     | 4.7E-2   | 1.0E0  |
| <input type="checkbox"/> | GOTERM_BP_ALL   | <a href="#">cell death</a>                                                                            | <a href="#">RT</a> |  | 21                     | 4.7E-2   | 1.0E0  |
| <input type="checkbox"/> | GOTERM_BP_ALL   | <a href="#">regulation of apoptosis</a>                                                               | <a href="#">RT</a> |  | 15                     | 4.8E-2   | 1.0E0  |
| <input type="checkbox"/> | GOTERM_BP_ALL   | <a href="#">apoptosis</a>                                                                             | <a href="#">RT</a> |  | 20                     | 5.1E-2   | 1.0E0  |
| <input type="checkbox"/> | GOTERM_BP_ALL   | <a href="#">regulation of programmed cell death</a>                                                   | <a href="#">RT</a> |  | 15                     | 5.4E-2   | 1.0E0  |
| <input type="checkbox"/> | SP_PIR_KEYWORDS | <a href="#">apoptosis</a>                                                                             | <a href="#">RT</a> |  | 10                     | 5.6E-2   | 9.1E-1 |
| <input type="checkbox"/> | GOTERM_BP_ALL   | <a href="#">programmed cell death</a>                                                                 | <a href="#">RT</a> |  | 20                     | 5.9E-2   | 1.0E0  |
| <input type="checkbox"/> | GOTERM_BP_ALL   | <a href="#">negative regulation of apoptosis</a>                                                      | <a href="#">RT</a> |  | 8                      | 7.2E-2   | 1.0E0  |
| <input type="checkbox"/> | GOTERM_BP_ALL   | <a href="#">negative regulation of programmed cell death</a>                                          | <a href="#">RT</a> |  | 8                      | 7.8E-2   | 1.0E0  |
| <input type="checkbox"/> | GOTERM_BP_ALL   | <a href="#">positive regulation of apoptosis</a>                                                      | <a href="#">RT</a> |  | 8                      | 9.5E-2   | 1.0E0  |
| <input type="checkbox"/> | GOTERM_BP_ALL   | <a href="#">positive regulation of programmed cell death</a>                                          | <a href="#">RT</a> |  | 8                      | 1.0E-1   | 1.0E0  |

|                          |                 |                                                                                       |                    |          |    |        |        |
|--------------------------|-----------------|---------------------------------------------------------------------------------------|--------------------|----------|----|--------|--------|
| <input type="checkbox"/> | GOTERM_BP_ALL   | <a href="#">induction of apoptosis by intracellular signals</a>                       | <a href="#">RT</a> |          | 3  | 1.1E-1 | 1.0E0  |
| <input type="checkbox"/> | GOTERM_BP_ALL   | <a href="#">cell differentiation</a>                                                  | <a href="#">RT</a> |          | 41 | 1.5E-1 | 1.0E0  |
| <input type="checkbox"/> | GOTERM_BP_ALL   | <a href="#">cellular developmental process</a>                                        | <a href="#">RT</a> |          | 41 | 1.5E-1 | 1.0E0  |
| <input type="checkbox"/> | GOTERM_BP_ALL   | <a href="#">negative regulation of biological process</a>                             | <a href="#">RT</a> |          | 25 | 1.5E-1 | 1.0E0  |
| <input type="checkbox"/> | GOTERM_BP_ALL   | <a href="#">positive regulation of cellular process</a>                               | <a href="#">RT</a> |          | 22 | 1.8E-1 | 1.0E0  |
| <input type="checkbox"/> | GOTERM_BP_ALL   | <a href="#">induction of programmed cell death</a>                                    | <a href="#">RT</a> |          | 6  | 1.9E-1 | 1.0E0  |
| <input type="checkbox"/> | GOTERM_BP_ALL   | <a href="#">induction of apoptosis</a>                                                | <a href="#">RT</a> |          | 6  | 1.9E-1 | 1.0E0  |
| <input type="checkbox"/> | GOTERM_BP_ALL   | <a href="#">cell development</a>                                                      | <a href="#">RT</a> |          | 28 | 2.0E-1 | 1.0E0  |
| <input type="checkbox"/> | GOTERM_BP_ALL   | <a href="#">regulation of neuron apoptosis</a>                                        | <a href="#">RT</a> |          | 3  | 2.2E-1 | 1.0E0  |
| <input type="checkbox"/> | GOTERM_BP_ALL   | <a href="#">negative regulation of cellular process</a>                               | <a href="#">RT</a> |          | 22 | 2.6E-1 | 1.0E0  |
| <input type="checkbox"/> | GOTERM_BP_ALL   | <a href="#">neuron apoptosis</a>                                                      | <a href="#">RT</a> |          | 3  | 2.6E-1 | 1.0E0  |
| <input type="checkbox"/> | GOTERM_BP_ALL   | <a href="#">developmental process</a>                                                 | <a href="#">RT</a> |          | 58 | 3.8E-1 | 1.0E0  |
| Annotation Cluster 25    |                 | Enrichment Score: 0.96                                                                |                    | <b>G</b> |    |        |        |
| <input type="checkbox"/> | INTERPRO        | <a href="#">Cyclin, N-terminal</a>                                                    | <a href="#">RT</a> |          | 3  | 8.2E-2 | 1.0E0  |
| <input type="checkbox"/> | INTERPRO        | <a href="#">Cyclin</a>                                                                | <a href="#">RT</a> |          | 3  | 1.1E-1 | 1.0E0  |
| <input type="checkbox"/> | SP_PIR_KEYWORDS | <a href="#">cyclin</a>                                                                | <a href="#">RT</a> |          | 4  | 1.2E-1 | 9.7E-1 |
| <input type="checkbox"/> | SMART           | <a href="#">CYCLIN</a>                                                                | <a href="#">RT</a> |          | 3  | 1.3E-1 | 1.0E0  |
| Annotation Cluster 26    |                 | Enrichment Score: 0.95                                                                |                    | <b>G</b> |    |        |        |
| <input type="checkbox"/> | GOTERM_BP_ALL   | <a href="#">regulation of actin polymerization and/or depolymerization</a>            | <a href="#">RT</a> |          | 4  | 3.7E-2 | 1.0E0  |
| <input type="checkbox"/> | GOTERM_BP_ALL   | <a href="#">regulation of actin filament length</a>                                   | <a href="#">RT</a> |          | 4  | 3.9E-2 | 1.0E0  |
| <input type="checkbox"/> | GOTERM_BP_ALL   | <a href="#">regulation of actin cytoskeleton organization and biogenesis</a>          | <a href="#">RT</a> |          | 4  | 3.9E-2 | 1.0E0  |
| <input type="checkbox"/> | GOTERM_BP_ALL   | <a href="#">regulation of cellular component size</a>                                 | <a href="#">RT</a> |          | 4  | 4.2E-2 | 1.0E0  |
| <input type="checkbox"/> | SP_PIR_KEYWORDS | <a href="#">actin-binding</a>                                                         | <a href="#">RT</a> |          | 8  | 4.3E-2 | 9.0E-1 |
| <input type="checkbox"/> | GOTERM_BP_ALL   | <a href="#">regulation of cytoskeleton organization and biogenesis</a>                | <a href="#">RT</a> |          | 4  | 5.0E-2 | 1.0E0  |
| <input type="checkbox"/> | GOTERM_BP_ALL   | <a href="#">regulation of organelle organization and biogenesis</a>                   | <a href="#">RT</a> |          | 4  | 5.0E-2 | 1.0E0  |
| <input type="checkbox"/> | GOTERM_BP_ALL   | <a href="#">actin polymerization and/or depolymerization</a>                          | <a href="#">RT</a> |          | 4  | 6.4E-2 | 1.0E0  |
| <input type="checkbox"/> | GOTERM_BP_ALL   | <a href="#">actin filament capping</a>                                                | <a href="#">RT</a> |          | 3  | 6.6E-2 | 1.0E0  |
| <input type="checkbox"/> | GOTERM_BP_ALL   | <a href="#">negative regulation of actin filament depolymerization</a>                | <a href="#">RT</a> |          | 3  | 6.6E-2 | 1.0E0  |
| <input type="checkbox"/> | GOTERM_BP_ALL   | <a href="#">actin filament depolymerization</a>                                       | <a href="#">RT</a> |          | 3  | 7.7E-2 | 1.0E0  |
| <input type="checkbox"/> | GOTERM_BP_ALL   | <a href="#">regulation of actin filament depolymerization</a>                         | <a href="#">RT</a> |          | 3  | 7.7E-2 | 1.0E0  |
| <input type="checkbox"/> | GOTERM_BP_ALL   | <a href="#">regulation of protein metabolic process</a>                               | <a href="#">RT</a> |          | 10 | 7.7E-2 | 1.0E0  |
| <input type="checkbox"/> | GOTERM_BP_ALL   | <a href="#">regulation of cellular component organization and biogenesis</a>          | <a href="#">RT</a> |          | 4  | 1.5E-1 | 1.0E0  |
| <input type="checkbox"/> | GOTERM_BP_ALL   | <a href="#">actin cytoskeleton organization and biogenesis</a>                        | <a href="#">RT</a> |          | 7  | 1.5E-1 | 1.0E0  |
| <input type="checkbox"/> | GOTERM_BP_ALL   | <a href="#">protein depolymerization</a>                                              | <a href="#">RT</a> |          | 3  | 1.5E-1 | 1.0E0  |
| <input type="checkbox"/> | GOTERM_BP_ALL   | <a href="#">negative regulation of cellular component organization and biogenesis</a> | <a href="#">RT</a> |          | 3  | 1.7E-1 | 1.0E0  |
| <input type="checkbox"/> | GOTERM_BP_ALL   | <a href="#">actin filament-based process</a>                                          | <a href="#">RT</a> |          | 7  | 1.8E-1 | 1.0E0  |
| <input type="checkbox"/> | GOTERM_CC_ALL   | <a href="#">ruffle</a>                                                                | <a href="#">RT</a> |          | 3  | 2.2E-1 | 9.9E-1 |
| <input type="checkbox"/> | GOTERM_BP_ALL   | <a href="#">negative regulation of protein metabolic process</a>                      | <a href="#">RT</a> |          | 3  | 4.8E-1 | 1.0E0  |
| <input type="checkbox"/> | GOTERM_CC_ALL   | <a href="#">leading edge</a>                                                          | <a href="#">RT</a> |          | 3  | 5.4E-1 | 1.0E0  |
| <input type="checkbox"/> | GOTERM_CC_ALL   | <a href="#">cell projection</a>                                                       | <a href="#">RT</a> |          | 6  | 8.5E-1 | 1.0E0  |
| <input type="checkbox"/> | GOTERM_BP_ALL   | <a href="#">negative regulation of metabolic process</a>                              | <a href="#">RT</a> |          | 6  | 8.7E-1 | 1.0E0  |
| Annotation Cluster 27    |                 | Enrichment Score: 0.93                                                                |                    | <b>G</b> |    |        |        |
| <input type="checkbox"/> | GOTERM_BP_ALL   | <a href="#">intracellular signaling cascade</a>                                       | <a href="#">RT</a> |          | 33 | 1.9E-2 | 1.0E0  |
| <input type="checkbox"/> | GOTERM_BP_ALL   | <a href="#">signal transduction</a>                                                   | <a href="#">RT</a> |          | 58 | 7.7E-2 | 1.0E0  |
| <input type="checkbox"/> | GOTERM_BP_ALL   | <a href="#">cell communication</a>                                                    | <a href="#">RT</a> |          | 60 | 1.7E-1 | 1.0E0  |

| <input type="checkbox"/> | Annotation                                   | Enrichment Score                                                                                             | RT | Count | P_Value | Benjamini |
|--------------------------|----------------------------------------------|--------------------------------------------------------------------------------------------------------------|----|-------|---------|-----------|
| <input type="checkbox"/> | GOTERM_BP_ALL                                | <a href="#">cell surface receptor linked signal transduction</a>                                             | RT | 23    | 7.4E-1  | 1.0E0     |
|                          | Annotation Cluster 28 Enrichment Score: 0.93 |                                                                                                              | G  | Count | P_Value | Benjamini |
| <input type="checkbox"/> | GOTERM_BP_ALL                                | <a href="#">regulation of progression through cell cycle</a>                                                 | RT | 12    | 8.4E-2  | 1.0E0     |
| <input type="checkbox"/> | GOTERM_BP_ALL                                | <a href="#">cell division</a>                                                                                | RT | 9     | 8.6E-2  | 1.0E0     |
| <input type="checkbox"/> | GOTERM_BP_ALL                                | <a href="#">regulation of cell cycle</a>                                                                     | RT | 12    | 8.7E-2  | 1.0E0     |
| <input type="checkbox"/> | GOTERM_BP_ALL                                | <a href="#">negative regulation of progression through cell cycle</a>                                        | RT | 6     | 1.1E-1  | 1.0E0     |
| <input type="checkbox"/> | GOTERM_BP_ALL                                | <a href="#">cell cycle</a>                                                                                   | RT | 19    | 1.3E-1  | 1.0E0     |
| <input type="checkbox"/> | SP_PIR_KEYWORDS                              | <a href="#">cell cycle</a>                                                                                   | RT | 11    | 1.4E-1  | 9.8E-1    |
| <input type="checkbox"/> | SP_PIR_KEYWORDS                              | <a href="#">cell division</a>                                                                                | RT | 7     | 1.4E-1  | 9.7E-1    |
| <input type="checkbox"/> | GOTERM_BP_ALL                                | <a href="#">cell cycle process</a>                                                                           | RT | 15    | 2.0E-1  | 1.0E0     |
|                          | Annotation Cluster 29 Enrichment Score: 0.88 |                                                                                                              | G  | Count | P_Value | Benjamini |
| <input type="checkbox"/> | INTERPRO                                     | <a href="#">Flavodoxin-like fold</a>                                                                         | RT | 3     | 9.3E-4  | 1.0E0     |
| <input type="checkbox"/> | GOTERM_MF_ALL                                | <a href="#">NAD(P)H dehydrogenase (quinone) activity</a>                                                     | RT | 3     | 9.7E-4  | 7.3E-1    |
| <input type="checkbox"/> | GOTERM_BP_ALL                                | <a href="#">response to oxidative stress</a>                                                                 | RT | 5     | 2.4E-2  | 1.0E0     |
| <input type="checkbox"/> | GOTERM_MF_ALL                                | <a href="#">oxidoreductase activity, acting on NADH or NADPH, quinone or similar compound as acceptor</a>    | RT | 3     | 1.8E-1  | 1.0E0     |
| <input type="checkbox"/> | GOTERM_MF_ALL                                | <a href="#">cofactor binding</a>                                                                             | RT | 6     | 2.5E-1  | 1.0E0     |
| <input type="checkbox"/> | GOTERM_MF_ALL                                | <a href="#">oxidoreductase activity, acting on NADH or NADPH</a>                                             | RT | 3     | 3.2E-1  | 1.0E0     |
| <input type="checkbox"/> | GOTERM_MF_ALL                                | <a href="#">coenzyme binding</a>                                                                             | RT | 4     | 4.2E-1  | 1.0E0     |
| <input type="checkbox"/> | SP_PIR_KEYWORDS                              | <a href="#">fad</a>                                                                                          | RT | 3     | 5.3E-1  | 1.0E0     |
| <input type="checkbox"/> | SP_PIR_KEYWORDS                              | <a href="#">flavoprotein</a>                                                                                 | RT | 3     | 5.6E-1  | 1.0E0     |
| <input type="checkbox"/> | GOTERM_MF_ALL                                | <a href="#">oxidoreductase activity</a>                                                                      | RT | 13    | 8.6E-1  | 1.0E0     |
| <input type="checkbox"/> | SP_PIR_KEYWORDS                              | <a href="#">oxidoreductase</a>                                                                               | RT | 7     | 9.2E-1  | 1.0E0     |
| <input type="checkbox"/> | GOTERM_BP_ALL                                | <a href="#">electron transport</a>                                                                           | RT | 5     | 9.4E-1  | 1.0E0     |
|                          | Annotation Cluster 30 Enrichment Score: 0.87 |                                                                                                              | G  | Count | P_Value | Benjamini |
| <input type="checkbox"/> | GOTERM_BP_ALL                                | <a href="#">lymphocyte homeostasis</a>                                                                       | RT | 3     | 5.6E-2  | 1.0E0     |
| <input type="checkbox"/> | GOTERM_BP_ALL                                | <a href="#">leukocyte homeostasis</a>                                                                        | RT | 3     | 9.3E-2  | 1.0E0     |
| <input type="checkbox"/> | GOTERM_BP_ALL                                | <a href="#">homeostasis of number of cells</a>                                                               | RT | 3     | 1.0E-1  | 1.0E0     |
| <input type="checkbox"/> | GOTERM_BP_ALL                                | <a href="#">leukocyte activation</a>                                                                         | RT | 8     | 1.5E-1  | 1.0E0     |
| <input type="checkbox"/> | GOTERM_BP_ALL                                | <a href="#">homeostatic process</a>                                                                          | RT | 8     | 5.2E-1  | 1.0E0     |
|                          | Annotation Cluster 31 Enrichment Score: 0.8  |                                                                                                              | G  | Count | P_Value | Benjamini |
| <input type="checkbox"/> | GOTERM_MF_ALL                                | <a href="#">protein heterodimerization activity</a>                                                          | RT | 8     | 2.1E-3  | 7.6E-1    |
| <input type="checkbox"/> | GOTERM_MF_ALL                                | <a href="#">protein dimerization activity</a>                                                                | RT | 13    | 5.0E-3  | 7.8E-1    |
| <input type="checkbox"/> | GOTERM_BP_ALL                                | <a href="#">embryonic placenta development</a>                                                               | RT | 3     | 2.0E-2  | 1.0E0     |
| <input type="checkbox"/> | GOTERM_MF_ALL                                | <a href="#">protein homodimerization activity</a>                                                            | RT | 7     | 5.1E-2  | 9.8E-1    |
| <input type="checkbox"/> | GOTERM_BP_ALL                                | <a href="#">in utero embryonic development</a>                                                               | RT | 6     | 8.1E-2  | 1.0E0     |
| <input type="checkbox"/> | GOTERM_BP_ALL                                | <a href="#">placenta development</a>                                                                         | RT | 3     | 9.9E-2  | 1.0E0     |
| <input type="checkbox"/> | GOTERM_MF_ALL                                | <a href="#">identical protein binding</a>                                                                    | RT | 9     | 1.5E-1  | 1.0E0     |
| <input type="checkbox"/> | GOTERM_BP_ALL                                | <a href="#">positive regulation of biological process</a>                                                    | RT | 25    | 1.5E-1  | 1.0E0     |
| <input type="checkbox"/> | GOTERM_BP_ALL                                | <a href="#">positive regulation of cellular process</a>                                                      | RT | 22    | 1.8E-1  | 1.0E0     |
| <input type="checkbox"/> | GOTERM_BP_ALL                                | <a href="#">positive regulation of cellular metabolic process</a>                                            | RT | 11    | 2.9E-1  | 1.0E0     |
| <input type="checkbox"/> | GOTERM_BP_ALL                                | <a href="#">positive regulation of transcription</a>                                                         | RT | 9     | 3.2E-1  | 1.0E0     |
| <input type="checkbox"/> | GOTERM_BP_ALL                                | <a href="#">positive regulation of nucleobase, nucleoside, nucleotide and nucleic acid metabolic process</a> | RT | 9     | 3.3E-1  | 1.0E0     |
| <input type="checkbox"/> | GOTERM_BP_ALL                                | <a href="#">positive regulation of metabolic process</a>                                                     | RT | 11    | 3.7E-1  | 1.0E0     |
| <input type="checkbox"/> | GOTERM_BP_ALL                                | <a href="#">chordate embryonic development</a>                                                               | RT | 6     | 3.8E-1  | 1.0E0     |
| <input type="checkbox"/> | GOTERM_BP_ALL                                | <a href="#">embryonic development ending in birth or egg hatching</a>                                        | RT | 6     | 4.0E-1  | 1.0E0     |

| <input type="checkbox"/> |                       |                                                                                                              |          |  |  |  |       |         |           |
|--------------------------|-----------------------|--------------------------------------------------------------------------------------------------------------|----------|--|--|--|-------|---------|-----------|
| <input type="checkbox"/> | SP_PIR_KEYWORDS       | <a href="#">DNA binding</a>                                                                                  | RT       |  |  |  | 6     | 5.0E-1  | 1.0E0     |
| <input type="checkbox"/> | GOTERM_BP_ALL         | <a href="#">positive regulation of transcription, DNA-dependent</a>                                          | RT       |  |  |  | 6     | 6.3E-1  | 1.0E0     |
| <input type="checkbox"/> | GOTERM_BP_ALL         | <a href="#">embryonic development</a>                                                                        | RT       |  |  |  | 8     | 7.3E-1  | 1.0E0     |
| <input type="checkbox"/> | GOTERM_MF_ALL         | <a href="#">transcription activator activity</a>                                                             | RT       |  |  |  | 4     | 7.6E-1  | 1.0E0     |
| <input type="checkbox"/> | GOTERM_BP_ALL         | <a href="#">regulation of developmental process</a>                                                          | RT       |  |  |  | 4     | 9.2E-1  | 1.0E0     |
|                          | Annotation Cluster 32 | Enrichment Score: 0.77                                                                                       | <b>G</b> |  |  |  | Count | P_Value | Benjamini |
| <input type="checkbox"/> | GOTERM_MF_ALL         | <a href="#">protein heterodimerization activity</a>                                                          | RT       |  |  |  | 8     | 2.1E-3  | 7.6E-1    |
| <input type="checkbox"/> | GOTERM_BP_ALL         | <a href="#">cell growth</a>                                                                                  | RT       |  |  |  | 6     | 8.5E-2  | 1.0E0     |
| <input type="checkbox"/> | GOTERM_BP_ALL         | <a href="#">regulation of cell size</a>                                                                      | RT       |  |  |  | 6     | 1.1E-1  | 1.0E0     |
| <input type="checkbox"/> | GOTERM_BP_ALL         | <a href="#">regulation of cell growth</a>                                                                    | RT       |  |  |  | 5     | 1.3E-1  | 1.0E0     |
| <input type="checkbox"/> | GOTERM_BP_ALL         | <a href="#">positive regulation of biological process</a>                                                    | RT       |  |  |  | 25    | 1.5E-1  | 1.0E0     |
| <input type="checkbox"/> | GOTERM_BP_ALL         | <a href="#">negative regulation of growth</a>                                                                | RT       |  |  |  | 3     | 1.7E-1  | 1.0E0     |
| <input type="checkbox"/> | GOTERM_BP_ALL         | <a href="#">positive regulation of cellular process</a>                                                      | RT       |  |  |  | 22    | 1.8E-1  | 1.0E0     |
| <input type="checkbox"/> | GOTERM_BP_ALL         | <a href="#">regulation of growth</a>                                                                         | RT       |  |  |  | 6     | 2.3E-1  | 1.0E0     |
| <input type="checkbox"/> | GOTERM_BP_ALL         | <a href="#">growth</a>                                                                                       | RT       |  |  |  | 8     | 2.5E-1  | 1.0E0     |
| <input type="checkbox"/> | GOTERM_BP_ALL         | <a href="#">positive regulation of cellular metabolic process</a>                                            | RT       |  |  |  | 11    | 2.9E-1  | 1.0E0     |
| <input type="checkbox"/> | GOTERM_BP_ALL         | <a href="#">positive regulation of transcription</a>                                                         | RT       |  |  |  | 9     | 3.2E-1  | 1.0E0     |
| <input type="checkbox"/> | GOTERM_BP_ALL         | <a href="#">positive regulation of nucleobase, nucleoside, nucleotide and nucleic acid metabolic process</a> | RT       |  |  |  | 9     | 3.3E-1  | 1.0E0     |
| <input type="checkbox"/> | GOTERM_BP_ALL         | <a href="#">positive regulation of metabolic process</a>                                                     | RT       |  |  |  | 11    | 3.7E-1  | 1.0E0     |
| <input type="checkbox"/> | GOTERM_BP_ALL         | <a href="#">cell morphogenesis</a>                                                                           | RT       |  |  |  | 12    | 3.8E-1  | 1.0E0     |
| <input type="checkbox"/> | GOTERM_BP_ALL         | <a href="#">cellular structure morphogenesis</a>                                                             | RT       |  |  |  | 12    | 3.8E-1  | 1.0E0     |
| <input type="checkbox"/> | GOTERM_BP_ALL         | <a href="#">positive regulation of catalytic activity</a>                                                    | RT       |  |  |  | 5     | 4.5E-1  | 1.0E0     |
|                          | Annotation Cluster 33 | Enrichment Score: 0.69                                                                                       | <b>G</b> |  |  |  | Count | P_Value | Benjamini |
| <input type="checkbox"/> | INTERPRO              | <a href="#">CD9/CD37/CD63 antigen</a>                                                                        | RT       |  |  |  | 4     | 1.6E-2  | 1.0E0     |
| <input type="checkbox"/> | GOTERM_CC_ALL         | <a href="#">plasma membrane part</a>                                                                         | RT       |  |  |  | 29    | 2.2E-1  | 9.9E-1    |
| <input type="checkbox"/> | GOTERM_CC_ALL         | <a href="#">integral to plasma membrane</a>                                                                  | RT       |  |  |  | 11    | 6.9E-1  | 1.0E0     |
| <input type="checkbox"/> | GOTERM_CC_ALL         | <a href="#">intrinsic to plasma membrane</a>                                                                 | RT       |  |  |  | 11    | 7.2E-1  | 1.0E0     |
|                          | Annotation Cluster 34 | Enrichment Score: 0.67                                                                                       | <b>G</b> |  |  |  | Count | P_Value | Benjamini |
| <input type="checkbox"/> | GOTERM_BP_ALL         | <a href="#">regulation of a molecular function</a>                                                           | RT       |  |  |  | 14    | 4.2E-2  | 1.0E0     |
| <input type="checkbox"/> | GOTERM_BP_ALL         | <a href="#">regulation of catalytic activity</a>                                                             | RT       |  |  |  | 12    | 7.1E-2  | 1.0E0     |
| <input type="checkbox"/> | GOTERM_BP_ALL         | <a href="#">regulation of MAP kinase activity</a>                                                            | RT       |  |  |  | 4     | 1.4E-1  | 1.0E0     |
| <input type="checkbox"/> | GOTERM_BP_ALL         | <a href="#">negative regulation of kinase activity</a>                                                       | RT       |  |  |  | 3     | 2.1E-1  | 1.0E0     |
| <input type="checkbox"/> | GOTERM_BP_ALL         | <a href="#">negative regulation of protein kinase activity</a>                                               | RT       |  |  |  | 3     | 2.1E-1  | 1.0E0     |
| <input type="checkbox"/> | GOTERM_BP_ALL         | <a href="#">negative regulation of transferase activity</a>                                                  | RT       |  |  |  | 3     | 2.3E-1  | 1.0E0     |
| <input type="checkbox"/> | GOTERM_BP_ALL         | <a href="#">MAPKKK cascade</a>                                                                               | RT       |  |  |  | 5     | 2.4E-1  | 1.0E0     |
| <input type="checkbox"/> | GOTERM_BP_ALL         | <a href="#">negative regulation of catalytic activity</a>                                                    | RT       |  |  |  | 3     | 3.2E-1  | 1.0E0     |
| <input type="checkbox"/> | GOTERM_BP_ALL         | <a href="#">regulation of protein kinase activity</a>                                                        | RT       |  |  |  | 5     | 3.8E-1  | 1.0E0     |
| <input type="checkbox"/> | GOTERM_BP_ALL         | <a href="#">regulation of kinase activity</a>                                                                | RT       |  |  |  | 5     | 4.1E-1  | 1.0E0     |
| <input type="checkbox"/> | GOTERM_BP_ALL         | <a href="#">protein kinase cascade</a>                                                                       | RT       |  |  |  | 7     | 4.3E-1  | 1.0E0     |
| <input type="checkbox"/> | GOTERM_BP_ALL         | <a href="#">regulation of transferase activity</a>                                                           | RT       |  |  |  | 5     | 4.4E-1  | 1.0E0     |
|                          | Annotation Cluster 35 | Enrichment Score: 0.64                                                                                       | <b>G</b> |  |  |  | Count | P_Value | Benjamini |
| <input type="checkbox"/> | GOTERM_BP_ALL         | <a href="#">lymphocyte proliferation</a>                                                                     | RT       |  |  |  | 5     | 7.9E-2  | 1.0E0     |
| <input type="checkbox"/> | GOTERM_BP_ALL         | <a href="#">mononuclear cell proliferation</a>                                                               | RT       |  |  |  | 5     | 7.9E-2  | 1.0E0     |
| <input type="checkbox"/> | GOTERM_BP_ALL         | <a href="#">cell growth</a>                                                                                  | RT       |  |  |  | 6     | 8.5E-2  | 1.0E0     |
| <input type="checkbox"/> | GOTERM_BP_ALL         | <a href="#">cell activation</a>                                                                              | RT       |  |  |  | 9     | 9.8E-2  | 1.0E0     |
| <input type="checkbox"/> | GOTERM_BP_ALL         | <a href="#">B cell activation</a>                                                                            | RT       |  |  |  | 5     | 1.0E-1  | 1.0E0     |
| <input type="checkbox"/> | GOTERM_BP_ALL         | <a href="#">B cell proliferation</a>                                                                         | RT       |  |  |  | 3     | 1.0E-1  | 1.0E0     |
| <input type="checkbox"/> | GOTERM_BP_ALL         | <a href="#">positive regulation of B cell activation</a>                                                     | RT       |  |  |  | 3     | 1.0E-1  | 1.0E0     |

|                          |                 |                                                                  |                    |  |       |         |           |
|--------------------------|-----------------|------------------------------------------------------------------|--------------------|--|-------|---------|-----------|
| <input type="checkbox"/> | GOTERM_BP_ALL   | <a href="#">regulation of cell size</a>                          | <a href="#">RT</a> |  | 6     | 1.1E-1  | 1.0E0     |
| <input type="checkbox"/> | GOTERM_BP_ALL   | <a href="#">leukocyte activation</a>                             | <a href="#">RT</a> |  | 8     | 1.5E-1  | 1.0E0     |
| <input type="checkbox"/> | GOTERM_BP_ALL   | <a href="#">regulation of B cell activation</a>                  | <a href="#">RT</a> |  | 3     | 1.9E-1  | 1.0E0     |
| <input type="checkbox"/> | GOTERM_BP_ALL   | <a href="#">positive regulation of cell proliferation</a>        | <a href="#">RT</a> |  | 7     | 2.0E-1  | 1.0E0     |
| <input type="checkbox"/> | GOTERM_BP_ALL   | <a href="#">immune system process</a>                            | <a href="#">RT</a> |  | 18    | 2.1E-1  | 1.0E0     |
| <input type="checkbox"/> | GOTERM_BP_ALL   | <a href="#">lymphocyte activation</a>                            | <a href="#">RT</a> |  | 7     | 2.2E-1  | 1.0E0     |
| <input type="checkbox"/> | GOTERM_BP_ALL   | <a href="#">regulation of growth</a>                             | <a href="#">RT</a> |  | 6     | 2.3E-1  | 1.0E0     |
| <input type="checkbox"/> | GOTERM_BP_ALL   | <a href="#">growth</a>                                           | <a href="#">RT</a> |  | 8     | 2.5E-1  | 1.0E0     |
| <input type="checkbox"/> | GOTERM_BP_ALL   | <a href="#">regulation of cell proliferation</a>                 | <a href="#">RT</a> |  | 10    | 2.9E-1  | 1.0E0     |
| <input type="checkbox"/> | GOTERM_BP_ALL   | <a href="#">regulation of mononuclear cell proliferation</a>     | <a href="#">RT</a> |  | 3     | 3.3E-1  | 1.0E0     |
| <input type="checkbox"/> | GOTERM_BP_ALL   | <a href="#">regulation of lymphocyte proliferation</a>           | <a href="#">RT</a> |  | 3     | 3.3E-1  | 1.0E0     |
| <input type="checkbox"/> | GOTERM_BP_ALL   | <a href="#">T cell proliferation</a>                             | <a href="#">RT</a> |  | 3     | 3.4E-1  | 1.0E0     |
| <input type="checkbox"/> | GOTERM_BP_ALL   | <a href="#">positive regulation of lymphocyte activation</a>     | <a href="#">RT</a> |  | 3     | 3.8E-1  | 1.0E0     |
| <input type="checkbox"/> | GOTERM_BP_ALL   | <a href="#">cell proliferation</a>                               | <a href="#">RT</a> |  | 12    | 4.4E-1  | 1.0E0     |
| <input type="checkbox"/> | GOTERM_BP_ALL   | <a href="#">positive regulation of catalytic activity</a>        | <a href="#">RT</a> |  | 5     | 4.5E-1  | 1.0E0     |
| <input type="checkbox"/> | GOTERM_BP_ALL   | <a href="#">T cell activation</a>                                | <a href="#">RT</a> |  | 4     | 4.8E-1  | 1.0E0     |
| <input type="checkbox"/> | GOTERM_BP_ALL   | <a href="#">regulation of lymphocyte activation</a>              | <a href="#">RT</a> |  | 3     | 5.7E-1  | 1.0E0     |
| <input type="checkbox"/> | GOTERM_BP_ALL   | <a href="#">regulation of cell activation</a>                    | <a href="#">RT</a> |  | 3     | 5.9E-1  | 1.0E0     |
| <input type="checkbox"/> | GOTERM_BP_ALL   | <a href="#">reproductive process</a>                             | <a href="#">RT</a> |  | 5     | 6.3E-1  | 1.0E0     |
| <input type="checkbox"/> | GOTERM_BP_ALL   | <a href="#">regulation of multicellular organismal process</a>   | <a href="#">RT</a> |  | 6     | 6.9E-1  | 1.0E0     |
| Annotation Cluster 36    |                 | Enrichment Score: 0.6                                            | <b>G</b>           |  | Count | P_Value | Benjamini |
| <input type="checkbox"/> | GOTERM_BP_ALL   | <a href="#">blood vessel morphogenesis</a>                       | <a href="#">RT</a> |  | 9     | 3.6E-2  | 1.0E0     |
| <input type="checkbox"/> | GOTERM_BP_ALL   | <a href="#">blood vessel development</a>                         | <a href="#">RT</a> |  | 9     | 7.3E-2  | 1.0E0     |
| <input type="checkbox"/> | GOTERM_BP_ALL   | <a href="#">vasculature development</a>                          | <a href="#">RT</a> |  | 9     | 7.8E-2  | 1.0E0     |
| <input type="checkbox"/> | GOTERM_BP_ALL   | <a href="#">cell differentiation</a>                             | <a href="#">RT</a> |  | 41    | 1.5E-1  | 1.0E0     |
| <input type="checkbox"/> | GOTERM_BP_ALL   | <a href="#">cellular developmental process</a>                   | <a href="#">RT</a> |  | 41    | 1.5E-1  | 1.0E0     |
| <input type="checkbox"/> | GOTERM_BP_ALL   | <a href="#">angiogenesis</a>                                     | <a href="#">RT</a> |  | 6     | 1.8E-1  | 1.0E0     |
| <input type="checkbox"/> | GOTERM_BP_ALL   | <a href="#">organ morphogenesis</a>                              | <a href="#">RT</a> |  | 14    | 2.0E-1  | 1.0E0     |
| <input type="checkbox"/> | GOTERM_BP_ALL   | <a href="#">anatomical structure formation</a>                   | <a href="#">RT</a> |  | 7     | 2.0E-1  | 1.0E0     |
| <input type="checkbox"/> | GOTERM_BP_ALL   | <a href="#">anatomical structure morphogenesis</a>               | <a href="#">RT</a> |  | 25    | 3.4E-1  | 1.0E0     |
| <input type="checkbox"/> | GOTERM_BP_ALL   | <a href="#">developmental process</a>                            | <a href="#">RT</a> |  | 58    | 3.8E-1  | 1.0E0     |
| <input type="checkbox"/> | GOTERM_BP_ALL   | <a href="#">system development</a>                               | <a href="#">RT</a> |  | 31    | 6.8E-1  | 1.0E0     |
| <input type="checkbox"/> | GOTERM_BP_ALL   | <a href="#">anatomical structure development</a>                 | <a href="#">RT</a> |  | 36    | 7.1E-1  | 1.0E0     |
| <input type="checkbox"/> | GOTERM_BP_ALL   | <a href="#">organ development</a>                                | <a href="#">RT</a> |  | 24    | 7.7E-1  | 1.0E0     |
| <input type="checkbox"/> | GOTERM_BP_ALL   | <a href="#">multicellular organismal development</a>             | <a href="#">RT</a> |  | 38    | 7.9E-1  | 1.0E0     |
| <input type="checkbox"/> | GOTERM_BP_ALL   | <a href="#">multicellular organismal process</a>                 | <a href="#">RT</a> |  | 49    | 8.2E-1  | 1.0E0     |
| Annotation Cluster 37    |                 | Enrichment Score: 0.58                                           | <b>G</b>           |  | Count | P_Value | Benjamini |
| <input type="checkbox"/> | GOTERM_MF_ALL   | <a href="#">chromatin binding</a>                                | <a href="#">RT</a> |  | 7     | 2.4E-2  | 9.2E-1    |
| <input type="checkbox"/> | GOTERM_CC_ALL   | <a href="#">heterochromatin</a>                                  | <a href="#">RT</a> |  | 3     | 1.6E-1  | 9.8E-1    |
| <input type="checkbox"/> | BIOCARTA        | <a href="#">Control of Gene Expression by Vitamin D Receptor</a> | <a href="#">RT</a> |  | 3     | 2.1E-1  | 1.0E0     |
| <input type="checkbox"/> | GOTERM_BP_ALL   | <a href="#">chromatin remodeling</a>                             | <a href="#">RT</a> |  | 3     | 2.2E-1  | 1.0E0     |
| <input type="checkbox"/> | GOTERM_BP_ALL   | <a href="#">chromatin modification</a>                           | <a href="#">RT</a> |  | 6     | 2.4E-1  | 1.0E0     |
| <input type="checkbox"/> | GOTERM_CC_ALL   | <a href="#">chromosomal part</a>                                 | <a href="#">RT</a> |  | 8     | 2.7E-1  | 9.9E-1    |
| <input type="checkbox"/> | SP_PIR_KEYWORDS | <a href="#">Chromatin regulator</a>                              | <a href="#">RT</a> |  | 4     | 3.0E-1  | 1.0E0     |
| <input type="checkbox"/> | GOTERM_BP_ALL   | <a href="#">chromatin assembly or disassembly</a>                | <a href="#">RT</a> |  | 4     | 3.0E-1  | 1.0E0     |
| <input type="checkbox"/> | GOTERM_CC_ALL   | <a href="#">chromosome, pericentric region</a>                   | <a href="#">RT</a> |  | 3     | 3.5E-1  | 1.0E0     |
| <input type="checkbox"/> | GOTERM_CC_ALL   | <a href="#">chromatin</a>                                        | <a href="#">RT</a> |  | 5     | 3.6E-1  | 1.0E0     |
| <input type="checkbox"/> | GOTERM_BP_ALL   | <a href="#">DNA metabolic process</a>                            | <a href="#">RT</a> |  | 14    | 3.7E-1  | 1.0E0     |

|                          |                 |                                                                            |                        |          |    |        |         |           |
|--------------------------|-----------------|----------------------------------------------------------------------------|------------------------|----------|----|--------|---------|-----------|
| <input type="checkbox"/> | GOTERM_BP_ALL   | <a href="#">chromosome organization and biogenesis</a>                     | RT                     |          | 8  | 3.9E-1 | 1.0E0   |           |
| <input type="checkbox"/> | GOTERM_CC_ALL   | <a href="#">chromosome</a>                                                 | RT                     |          | 8  | 4.0E-1 | 1.0E0   |           |
| <input type="checkbox"/> | GOTERM_BP_ALL   | <a href="#">establishment and/or maintenance of chromatin architecture</a> | RT                     |          | 6  | 4.8E-1 | 1.0E0   |           |
| <input type="checkbox"/> | GOTERM_BP_ALL   | <a href="#">DNA packaging</a>                                              | RT                     |          | 6  | 5.0E-1 | 1.0E0   |           |
|                          |                 | Annotation Cluster 38                                                      | Enrichment Score: 0.58 | <b>G</b> |    | Count  | P_Value | Benjamini |
| <input type="checkbox"/> | GOTERM_CC_ALL   | <a href="#">cytoskeletal part</a>                                          | RT                     |          | 16 | 8.1E-2 | 9.3E-1  |           |
| <input type="checkbox"/> | GOTERM_CC_ALL   | <a href="#">cytoskeleton</a>                                               | RT                     |          | 23 | 9.8E-2 | 9.2E-1  |           |
| <input type="checkbox"/> | GOTERM_CC_ALL   | <a href="#">microtubule cytoskeleton</a>                                   | RT                     |          | 10 | 1.4E-1 | 9.7E-1  |           |
| <input type="checkbox"/> | GOTERM_BP_ALL   | <a href="#">microtubule-based process</a>                                  | RT                     |          | 7  | 1.6E-1 | 1.0E0   |           |
| <input type="checkbox"/> | GOTERM_BP_ALL   | <a href="#">cytoskeleton organization and biogenesis</a>                   | RT                     |          | 13 | 2.1E-1 | 1.0E0   |           |
| <input type="checkbox"/> | GOTERM_CC_ALL   | <a href="#">microtubule</a>                                                | RT                     |          | 6  | 2.9E-1 | 9.9E-1  |           |
| <input type="checkbox"/> | GOTERM_MF_ALL   | <a href="#">microtubule motor activity</a>                                 | RT                     |          | 3  | 3.8E-1 | 1.0E0   |           |
| <input type="checkbox"/> | GOTERM_BP_ALL   | <a href="#">cytoskeleton-dependent intracellular transport</a>             | RT                     |          | 4  | 3.8E-1 | 1.0E0   |           |
| <input type="checkbox"/> | GOTERM_MF_ALL   | <a href="#">motor activity</a>                                             | RT                     |          | 4  | 4.6E-1 | 1.0E0   |           |
| <input type="checkbox"/> | SP_PIR_KEYWORDS | <a href="#">motor protein</a>                                              | RT                     |          | 3  | 5.1E-1 | 1.0E0   |           |
| <input type="checkbox"/> | GOTERM_CC_ALL   | <a href="#">microtubule associated complex</a>                             | RT                     |          | 3  | 5.7E-1 | 1.0E0   |           |
| <input type="checkbox"/> | GOTERM_BP_ALL   | <a href="#">microtubule-based movement</a>                                 | RT                     |          | 3  | 5.7E-1 | 1.0E0   |           |
|                          |                 | Annotation Cluster 39                                                      | Enrichment Score: 0.58 | <b>G</b> |    | Count  | P_Value | Benjamini |
| <input type="checkbox"/> | GOTERM_BP_ALL   | <a href="#">phosphatidylinositol metabolic process</a>                     | RT                     |          | 3  | 2.0E-2 | 1.0E0   |           |
| <input type="checkbox"/> | GOTERM_BP_ALL   | <a href="#">glycerophospholipid biosynthetic process</a>                   | RT                     |          | 3  | 1.4E-1 | 1.0E0   |           |
| <input type="checkbox"/> | GOTERM_BP_ALL   | <a href="#">glycerophospholipid metabolic process</a>                      | RT                     |          | 4  | 1.4E-1 | 1.0E0   |           |
| <input type="checkbox"/> | GOTERM_BP_ALL   | <a href="#">phospholipid metabolic process</a>                             | RT                     |          | 5  | 2.4E-1 | 1.0E0   |           |
| <input type="checkbox"/> | GOTERM_BP_ALL   | <a href="#">phosphoinositide metabolic process</a>                         | RT                     |          | 3  | 2.5E-1 | 1.0E0   |           |
| <input type="checkbox"/> | GOTERM_BP_ALL   | <a href="#">phospholipid biosynthetic process</a>                          | RT                     |          | 3  | 3.5E-1 | 1.0E0   |           |
| <input type="checkbox"/> | GOTERM_BP_ALL   | <a href="#">membrane lipid metabolic process</a>                           | RT                     |          | 5  | 4.1E-1 | 1.0E0   |           |
| <input type="checkbox"/> | GOTERM_BP_ALL   | <a href="#">membrane lipid biosynthetic process</a>                        | RT                     |          | 3  | 4.5E-1 | 1.0E0   |           |
| <input type="checkbox"/> | GOTERM_BP_ALL   | <a href="#">lipid biosynthetic process</a>                                 | RT                     |          | 6  | 5.1E-1 | 1.0E0   |           |
| <input type="checkbox"/> | GOTERM_BP_ALL   | <a href="#">lipid metabolic process</a>                                    | RT                     |          | 11 | 7.5E-1 | 1.0E0   |           |
| <input type="checkbox"/> | GOTERM_BP_ALL   | <a href="#">cellular lipid metabolic process</a>                           | RT                     |          | 9  | 8.0E-1 | 1.0E0   |           |
|                          |                 | Annotation Cluster 40                                                      | Enrichment Score: 0.53 | <b>G</b> |    | Count  | P_Value | Benjamini |
| <input type="checkbox"/> | GOTERM_BP_ALL   | <a href="#">anatomical structure formation</a>                             | RT                     |          | 7  | 2.0E-1 | 1.0E0   |           |
| <input type="checkbox"/> | GOTERM_BP_ALL   | <a href="#">wound healing</a>                                              | RT                     |          | 4  | 2.5E-1 | 1.0E0   |           |
| <input type="checkbox"/> | GOTERM_BP_ALL   | <a href="#">blood coagulation</a>                                          | RT                     |          | 3  | 3.0E-1 | 1.0E0   |           |
| <input type="checkbox"/> | GOTERM_BP_ALL   | <a href="#">coagulation</a>                                                | RT                     |          | 3  | 3.1E-1 | 1.0E0   |           |
| <input type="checkbox"/> | GOTERM_BP_ALL   | <a href="#">hemostasis</a>                                                 | RT                     |          | 3  | 3.2E-1 | 1.0E0   |           |
| <input type="checkbox"/> | GOTERM_BP_ALL   | <a href="#">regulation of body fluid levels</a>                            | RT                     |          | 3  | 4.3E-1 | 1.0E0   |           |
|                          |                 | Annotation Cluster 41                                                      | Enrichment Score: 0.52 | <b>G</b> |    | Count  | P_Value | Benjamini |
| <input type="checkbox"/> | GOTERM_BP_ALL   | <a href="#">caspase activation</a>                                         | RT                     |          | 3  | 8.2E-2 | 1.0E0   |           |
| <input type="checkbox"/> | GOTERM_BP_ALL   | <a href="#">positive regulation of caspase activity</a>                    | RT                     |          | 3  | 1.0E-1 | 1.0E0   |           |
| <input type="checkbox"/> | GOTERM_BP_ALL   | <a href="#">positive regulation of hydrolase activity</a>                  | RT                     |          | 3  | 1.7E-1 | 1.0E0   |           |
| <input type="checkbox"/> | GOTERM_BP_ALL   | <a href="#">regulation of caspase activity</a>                             | RT                     |          | 3  | 1.9E-1 | 1.0E0   |           |
| <input type="checkbox"/> | GOTERM_BP_ALL   | <a href="#">apoptotic program</a>                                          | RT                     |          | 3  | 3.0E-1 | 1.0E0   |           |
| <input type="checkbox"/> | GOTERM_BP_ALL   | <a href="#">positive regulation of catalytic activity</a>                  | RT                     |          | 5  | 4.5E-1 | 1.0E0   |           |
| <input type="checkbox"/> | GOTERM_BP_ALL   | <a href="#">response to DNA damage stimulus</a>                            | RT                     |          | 6  | 5.1E-1 | 1.0E0   |           |
| <input type="checkbox"/> | GOTERM_BP_ALL   | <a href="#">response to endogenous stimulus</a>                            | RT                     |          | 6  | 6.1E-1 | 1.0E0   |           |
| <input type="checkbox"/> | GOTERM_BP_ALL   | <a href="#">DNA repair</a>                                                 | RT                     |          | 4  | 7.3E-1 | 1.0E0   |           |
| <input type="checkbox"/> | GOTERM_BP_ALL   | <a href="#">regulation of hydrolase activity</a>                           | RT                     |          | 3  | 7.7E-1 | 1.0E0   |           |
|                          |                 | Annotation Cluster 42                                                      | Enrichment Score: 0.52 | <b>G</b> |    | Count  | P_Value | Benjamini |
| <input type="checkbox"/> | GOTERM_BP_ALL   | <a href="#">nucleocytoplasmic transport</a>                                | RT                     |          | 5  | 1.7E-1 | 1.0E0   |           |

| <input type="checkbox"/> |                       |                                                                                  |                    |  |  |       |         |           |  |  |
|--------------------------|-----------------------|----------------------------------------------------------------------------------|--------------------|--|--|-------|---------|-----------|--|--|
| <input type="checkbox"/> | GOTERM_BP_ALL         | <a href="#">nuclear transport</a>                                                | <a href="#">RT</a> |  |  | 5     | 1.8E-1  | 1.0E0     |  |  |
| <input type="checkbox"/> | GOTERM_BP_ALL         | <a href="#">protein import into nucleus</a>                                      | <a href="#">RT</a> |  |  | 3     | 3.6E-1  | 1.0E0     |  |  |
| <input type="checkbox"/> | GOTERM_BP_ALL         | <a href="#">nuclear import</a>                                                   | <a href="#">RT</a> |  |  | 3     | 3.7E-1  | 1.0E0     |  |  |
| <input type="checkbox"/> | GOTERM_BP_ALL         | <a href="#">protein import</a>                                                   | <a href="#">RT</a> |  |  | 3     | 4.5E-1  | 1.0E0     |  |  |
| <input type="checkbox"/> | GOTERM_BP_ALL         | <a href="#">protein targeting</a>                                                | <a href="#">RT</a> |  |  | 6     | 4.5E-1  | 1.0E0     |  |  |
|                          | Annotation Cluster 43 | Enrichment Score: 0.51                                                           | <b>G</b>           |  |  | Count | P_Value | Benjamini |  |  |
| <input type="checkbox"/> | GOTERM_CC_ALL         | <a href="#">intracellular organelle part</a>                                     | <a href="#">RT</a> |  |  | 51    | 2.7E-1  | 9.9E-1    |  |  |
| <input type="checkbox"/> | GOTERM_CC_ALL         | <a href="#">organelle part</a>                                                   | <a href="#">RT</a> |  |  | 51    | 2.8E-1  | 9.9E-1    |  |  |
| <input type="checkbox"/> | GOTERM_CC_ALL         | <a href="#">intracellular non-membrane-bound organelle</a>                       | <a href="#">RT</a> |  |  | 31    | 3.4E-1  | 1.0E0     |  |  |
| <input type="checkbox"/> | GOTERM_CC_ALL         | <a href="#">non-membrane-bound organelle</a>                                     | <a href="#">RT</a> |  |  | 31    | 3.4E-1  | 1.0E0     |  |  |
|                          | Annotation Cluster 44 | Enrichment Score: 0.5                                                            | <b>G</b>           |  |  | Count | P_Value | Benjamini |  |  |
| <input type="checkbox"/> | GOTERM_BP_ALL         | <a href="#">male gamete generation</a>                                           | <a href="#">RT</a> |  |  | 6     | 2.8E-1  | 1.0E0     |  |  |
| <input type="checkbox"/> | GOTERM_BP_ALL         | <a href="#">spermatogenesis</a>                                                  | <a href="#">RT</a> |  |  | 6     | 2.8E-1  | 1.0E0     |  |  |
| <input type="checkbox"/> | GOTERM_BP_ALL         | <a href="#">sexual reproduction</a>                                              | <a href="#">RT</a> |  |  | 8     | 3.4E-1  | 1.0E0     |  |  |
| <input type="checkbox"/> | GOTERM_BP_ALL         | <a href="#">reproduction</a>                                                     | <a href="#">RT</a> |  |  | 11    | 3.4E-1  | 1.0E0     |  |  |
| <input type="checkbox"/> | GOTERM_BP_ALL         | <a href="#">gamete generation</a>                                                | <a href="#">RT</a> |  |  | 7     | 3.4E-1  | 1.0E0     |  |  |
|                          | Annotation Cluster 45 | Enrichment Score: 0.5                                                            | <b>G</b>           |  |  | Count | P_Value | Benjamini |  |  |
| <input type="checkbox"/> | GOTERM_BP_ALL         | <a href="#">protein complex assembly</a>                                         | <a href="#">RT</a> |  |  | 7     | 9.4E-2  | 1.0E0     |  |  |
| <input type="checkbox"/> | GOTERM_CC_ALL         | <a href="#">cytoplasmic vesicle membrane</a>                                     | <a href="#">RT</a> |  |  | 4     | 1.3E-1  | 9.6E-1    |  |  |
| <input type="checkbox"/> | GOTERM_MF_ALL         | <a href="#">protein transporter activity</a>                                     | <a href="#">RT</a> |  |  | 6     | 1.6E-1  | 1.0E0     |  |  |
| <input type="checkbox"/> | GOTERM_CC_ALL         | <a href="#">cytoplasmic vesicle part</a>                                         | <a href="#">RT</a> |  |  | 4     | 1.7E-1  | 9.8E-1    |  |  |
| <input type="checkbox"/> | GOTERM_CC_ALL         | <a href="#">secretory granule</a>                                                | <a href="#">RT</a> |  |  | 3     | 2.2E-1  | 9.9E-1    |  |  |
| <input type="checkbox"/> | GOTERM_CC_ALL         | <a href="#">vesicle membrane</a>                                                 | <a href="#">RT</a> |  |  | 4     | 2.2E-1  | 9.9E-1    |  |  |
| <input type="checkbox"/> | GOTERM_CC_ALL         | <a href="#">vesicle coat</a>                                                     | <a href="#">RT</a> |  |  | 3     | 2.2E-1  | 9.9E-1    |  |  |
| <input type="checkbox"/> | GOTERM_CC_ALL         | <a href="#">coated vesicle membrane</a>                                          | <a href="#">RT</a> |  |  | 3     | 2.4E-1  | 9.9E-1    |  |  |
| <input type="checkbox"/> | GOTERM_CC_ALL         | <a href="#">membrane coat</a>                                                    | <a href="#">RT</a> |  |  | 3     | 2.9E-1  | 9.9E-1    |  |  |
| <input type="checkbox"/> | GOTERM_CC_ALL         | <a href="#">coated membrane</a>                                                  | <a href="#">RT</a> |  |  | 3     | 2.9E-1  | 9.9E-1    |  |  |
| <input type="checkbox"/> | GOTERM_CC_ALL         | <a href="#">cytoplasmic vesicle</a>                                              | <a href="#">RT</a> |  |  | 8     | 4.3E-1  | 1.0E0     |  |  |
| <input type="checkbox"/> | GOTERM_CC_ALL         | <a href="#">vesicle</a>                                                          | <a href="#">RT</a> |  |  | 8     | 4.6E-1  | 1.0E0     |  |  |
| <input type="checkbox"/> | GOTERM_BP_ALL         | <a href="#">vesicle-mediated transport</a>                                       | <a href="#">RT</a> |  |  | 9     | 5.8E-1  | 1.0E0     |  |  |
| <input type="checkbox"/> | GOTERM_CC_ALL         | <a href="#">endomembrane system</a>                                              | <a href="#">RT</a> |  |  | 8     | 6.0E-1  | 1.0E0     |  |  |
| <input type="checkbox"/> | GOTERM_CC_ALL         | <a href="#">cytoplasmic membrane-bound vesicle</a>                               | <a href="#">RT</a> |  |  | 5     | 6.5E-1  | 1.0E0     |  |  |
| <input type="checkbox"/> | GOTERM_CC_ALL         | <a href="#">coated vesicle</a>                                                   | <a href="#">RT</a> |  |  | 3     | 6.6E-1  | 1.0E0     |  |  |
| <input type="checkbox"/> | GOTERM_CC_ALL         | <a href="#">membrane-bound vesicle</a>                                           | <a href="#">RT</a> |  |  | 5     | 6.8E-1  | 1.0E0     |  |  |
| <input type="checkbox"/> | SP_PIR_KEYWORDS       | <a href="#">cytoplasmic vesicle</a>                                              | <a href="#">RT</a> |  |  | 3     | 7.0E-1  | 1.0E0     |  |  |
|                          | Annotation Cluster 46 | Enrichment Score: 0.48                                                           | <b>G</b>           |  |  | Count | P_Value | Benjamini |  |  |
| <input type="checkbox"/> | GOTERM_MF_ALL         | <a href="#">phosphoprotein phosphatase activity</a>                              | <a href="#">RT</a> |  |  | 6     | 1.4E-1  | 1.0E0     |  |  |
| <input type="checkbox"/> | GOTERM_MF_ALL         | <a href="#">protein tyrosine/serine/threonine phosphatase activity</a>           | <a href="#">RT</a> |  |  | 3     | 1.6E-1  | 1.0E0     |  |  |
| <input type="checkbox"/> | GOTERM_MF_ALL         | <a href="#">protein tyrosine phosphatase activity</a>                            | <a href="#">RT</a> |  |  | 4     | 2.2E-1  | 1.0E0     |  |  |
| <input type="checkbox"/> | UP_SEQ_FEATURE        | domain:Tyrosine-protein phosphatase                                              | <a href="#">RT</a> |  |  | 3     | 2.2E-1  | 1.0E0     |  |  |
| <input type="checkbox"/> | UP_SEQ_FEATURE        | active site:Phosphocysteine intermediate                                         | <a href="#">RT</a> |  |  | 3     | 3.1E-1  | 1.0E0     |  |  |
| <input type="checkbox"/> | SP_PIR_KEYWORDS       | <a href="#">protein phosphatase</a>                                              | <a href="#">RT</a> |  |  | 4     | 3.1E-1  | 1.0E0     |  |  |
| <input type="checkbox"/> | GOTERM_BP_ALL         | <a href="#">protein amino acid dephosphorylation</a>                             | <a href="#">RT</a> |  |  | 4     | 4.0E-1  | 1.0E0     |  |  |
| <input type="checkbox"/> | INTERPRO              | <a href="#">Protein-tyrosine phosphatase, Tyr-specific/dual-specificity type</a> | <a href="#">RT</a> |  |  | 3     | 4.2E-1  | 1.0E0     |  |  |
| <input type="checkbox"/> | GOTERM_MF_ALL         | <a href="#">phosphoric monoester hydrolase activity</a>                          | <a href="#">RT</a> |  |  | 6     | 4.3E-1  | 1.0E0     |  |  |
| <input type="checkbox"/> | GOTERM_BP_ALL         | <a href="#">dephosphorylation</a>                                                | <a href="#">RT</a> |  |  | 4     | 4.7E-1  | 1.0E0     |  |  |
| <input type="checkbox"/> | GOTERM_MF_ALL         | <a href="#">phosphoric ester hydrolase activity</a>                              | <a href="#">RT</a> |  |  | 6     | 6.4E-1  | 1.0E0     |  |  |
| <input type="checkbox"/> | GOTERM_MF_ALL         | <a href="#">hydrolase activity, acting on ester bonds</a>                        | <a href="#">RT</a> |  |  | 9     | 8.8E-1  | 1.0E0     |  |  |
|                          | Annotation Cluster 47 | Enrichment Score: 0.44                                                           | <b>G</b>           |  |  | Count | P_Value | Benjamini |  |  |

| <input type="checkbox"/> | GOTERM_BP_ALL         | <a href="#">phosphate metabolic process</a>                                                         | <a href="#">RT</a> |  | 22 | 1.1E-1 | 1.0E0  |       |         |           |
|--------------------------|-----------------------|-----------------------------------------------------------------------------------------------------|--------------------|--|----|--------|--------|-------|---------|-----------|
| <input type="checkbox"/> | GOTERM_BP_ALL         | <a href="#">phosphorus metabolic process</a>                                                        | <a href="#">RT</a> |  | 22 | 1.1E-1 | 1.0E0  |       |         |           |
| <input type="checkbox"/> | INTERPRO              | <a href="#">Serine/threonine protein kinase</a>                                                     | <a href="#">RT</a> |  | 7  | 1.7E-1 | 1.0E0  |       |         |           |
| <input type="checkbox"/> | GOTERM_BP_ALL         | <a href="#">phosphorylation</a>                                                                     | <a href="#">RT</a> |  | 18 | 1.7E-1 | 1.0E0  |       |         |           |
| <input type="checkbox"/> | GOTERM_MF_ALL         | <a href="#">kinase activity</a>                                                                     | <a href="#">RT</a> |  | 21 | 1.8E-1 | 1.0E0  |       |         |           |
| <input type="checkbox"/> | GOTERM_MF_ALL         | <a href="#">phosphotransferase activity, alcohol group as acceptor</a>                              | <a href="#">RT</a> |  | 17 | 2.0E-1 | 1.0E0  |       |         |           |
| <input type="checkbox"/> | GOTERM_MF_ALL         | <a href="#">protein kinase activity</a>                                                             | <a href="#">RT</a> |  | 14 | 2.9E-1 | 1.0E0  |       |         |           |
| <input type="checkbox"/> | GOTERM_MF_ALL         | <a href="#">transferase activity, transferring phosphorus-containing groups</a>                     | <a href="#">RT</a> |  | 22 | 3.0E-1 | 1.0E0  |       |         |           |
| <input type="checkbox"/> | SMART                 | <a href="#">S_TKc</a>                                                                               | <a href="#">RT</a> |  | 9  | 3.3E-1 | 1.0E0  |       |         |           |
| <input type="checkbox"/> | UP_SEQ_FEATURE        | nucleotide phosphate-binding region:ATP                                                             | <a href="#">RT</a> |  | 15 | 3.6E-1 | 1.0E0  |       |         |           |
| <input type="checkbox"/> | GOTERM_MF_ALL         | <a href="#">protein serine/threonine kinase activity</a>                                            | <a href="#">RT</a> |  | 11 | 3.7E-1 | 1.0E0  |       |         |           |
| <input type="checkbox"/> | GOTERM_BP_ALL         | <a href="#">protein amino acid phosphorylation</a>                                                  | <a href="#">RT</a> |  | 14 | 3.8E-1 | 1.0E0  |       |         |           |
| <input type="checkbox"/> | UP_SEQ_FEATURE        | active site:Proton acceptor                                                                         | <a href="#">RT</a> |  | 12 | 4.0E-1 | 1.0E0  |       |         |           |
| <input type="checkbox"/> | SP_PIR_KEYWORDS       | <a href="#">kinase</a>                                                                              | <a href="#">RT</a> |  | 15 | 4.3E-1 | 1.0E0  |       |         |           |
| <input type="checkbox"/> | INTERPRO              | <a href="#">Serine/threonine protein kinase, active site</a>                                        | <a href="#">RT</a> |  | 6  | 4.6E-1 | 1.0E0  |       |         |           |
| <input type="checkbox"/> | GOTERM_MF_ALL         | <a href="#">transferase activity</a>                                                                | <a href="#">RT</a> |  | 34 | 4.9E-1 | 1.0E0  |       |         |           |
| <input type="checkbox"/> | UP_SEQ_FEATURE        | binding site:ATP                                                                                    | <a href="#">RT</a> |  | 9  | 5.1E-1 | 1.0E0  |       |         |           |
| <input type="checkbox"/> | UP_SEQ_FEATURE        | domain:Protein kinase                                                                               | <a href="#">RT</a> |  | 8  | 5.7E-1 | 1.0E0  |       |         |           |
| <input type="checkbox"/> | INTERPRO              | <a href="#">Protein kinase, core</a>                                                                | <a href="#">RT</a> |  | 7  | 5.8E-1 | 1.0E0  |       |         |           |
| <input type="checkbox"/> | SP_PIR_KEYWORDS       | <a href="#">Serine/threonine-protein kinase</a>                                                     | <a href="#">RT</a> |  | 7  | 6.4E-1 | 1.0E0  |       |         |           |
| <input type="checkbox"/> | INTERPRO              | <a href="#">Tyrosine protein kinase</a>                                                             | <a href="#">RT</a> |  | 3  | 6.5E-1 | 1.0E0  |       |         |           |
| <input type="checkbox"/> | SMART                 | <a href="#">TyrKc</a>                                                                               | <a href="#">RT</a> |  | 3  | 6.9E-1 | 1.0E0  |       |         |           |
| <input type="checkbox"/> | SP_PIR_KEYWORDS       | <a href="#">transferase</a>                                                                         | <a href="#">RT</a> |  | 22 | 7.6E-1 | 1.0E0  |       |         |           |
| <input type="checkbox"/> | GOTERM_MF_ALL         | <a href="#">protein-tyrosine kinase activity</a>                                                    | <a href="#">RT</a> |  | 5  | 8.3E-1 | 1.0E0  |       |         |           |
|                          | Annotation Cluster 48 | Enrichment Score: 0.43                                                                              | <b>G</b>           |  |    |        |        | Count | P_Value | Benjamini |
| <input type="checkbox"/> | SP_PIR_KEYWORDS       | <a href="#">activator</a>                                                                           | <a href="#">RT</a> |  | 16 | 8.2E-3 | 6.4E-1 |       |         |           |
| <input type="checkbox"/> | SP_PIR_KEYWORDS       | <a href="#">Transcription regulation</a>                                                            | <a href="#">RT</a> |  | 33 | 4.4E-2 | 8.9E-1 |       |         |           |
| <input type="checkbox"/> | SP_PIR_KEYWORDS       | <a href="#">Transcription</a>                                                                       | <a href="#">RT</a> |  | 33 | 5.5E-2 | 9.1E-1 |       |         |           |
| <input type="checkbox"/> | GOTERM_BP_ALL         | <a href="#">biological regulation</a>                                                               | <a href="#">RT</a> |  | 91 | 1.5E-1 | 1.0E0  |       |         |           |
| <input type="checkbox"/> | GOTERM_BP_ALL         | <a href="#">regulation of cellular process</a>                                                      | <a href="#">RT</a> |  | 76 | 1.7E-1 | 1.0E0  |       |         |           |
| <input type="checkbox"/> | GOTERM_BP_ALL         | <a href="#">regulation of biological process</a>                                                    | <a href="#">RT</a> |  | 82 | 2.1E-1 | 1.0E0  |       |         |           |
| <input type="checkbox"/> | SP_PIR_KEYWORDS       | <a href="#">nucleus</a>                                                                             | <a href="#">RT</a> |  | 62 | 3.1E-1 | 1.0E0  |       |         |           |
| <input type="checkbox"/> | GOTERM_BP_ALL         | <a href="#">biopolymer metabolic process</a>                                                        | <a href="#">RT</a> |  | 87 | 3.3E-1 | 1.0E0  |       |         |           |
| <input type="checkbox"/> | GOTERM_MF_ALL         | <a href="#">transcription factor activity</a>                                                       | <a href="#">RT</a> |  | 19 | 3.9E-1 | 1.0E0  |       |         |           |
| <input type="checkbox"/> | GOTERM_MF_ALL         | <a href="#">transcription regulator activity</a>                                                    | <a href="#">RT</a> |  | 25 | 4.4E-1 | 1.0E0  |       |         |           |
| <input type="checkbox"/> | GOTERM_CC_ALL         | <a href="#">nucleus</a>                                                                             | <a href="#">RT</a> |  | 76 | 4.8E-1 | 1.0E0  |       |         |           |
| <input type="checkbox"/> | GOTERM_BP_ALL         | <a href="#">regulation of transcription, DNA-dependent</a>                                          | <a href="#">RT</a> |  | 39 | 5.7E-1 | 1.0E0  |       |         |           |
| <input type="checkbox"/> | GOTERM_BP_ALL         | <a href="#">regulation of metabolic process</a>                                                     | <a href="#">RT</a> |  | 47 | 5.9E-1 | 1.0E0  |       |         |           |
| <input type="checkbox"/> | GOTERM_BP_ALL         | <a href="#">transcription, DNA-dependent</a>                                                        | <a href="#">RT</a> |  | 39 | 6.0E-1 | 1.0E0  |       |         |           |
| <input type="checkbox"/> | GOTERM_BP_ALL         | <a href="#">RNA biosynthetic process</a>                                                            | <a href="#">RT</a> |  | 39 | 6.1E-1 | 1.0E0  |       |         |           |
| <input type="checkbox"/> | GOTERM_BP_ALL         | <a href="#">RNA metabolic process</a>                                                               | <a href="#">RT</a> |  | 46 | 6.6E-1 | 1.0E0  |       |         |           |
| <input type="checkbox"/> | GOTERM_BP_ALL         | <a href="#">regulation of cellular metabolic process</a>                                            | <a href="#">RT</a> |  | 44 | 6.6E-1 | 1.0E0  |       |         |           |
| <input type="checkbox"/> | GOTERM_BP_ALL         | <a href="#">regulation of nucleobase, nucleoside, nucleotide and nucleic acid metabolic process</a> | <a href="#">RT</a> |  | 40 | 6.8E-1 | 1.0E0  |       |         |           |
| <input type="checkbox"/> | GOTERM_BP_ALL         | <a href="#">regulation of transcription</a>                                                         | <a href="#">RT</a> |  | 39 | 7.0E-1 | 1.0E0  |       |         |           |
| <input type="checkbox"/> | GOTERM_BP_ALL         | <a href="#">transcription</a>                                                                       | <a href="#">RT</a> |  | 40 | 7.2E-1 | 1.0E0  |       |         |           |
| <input type="checkbox"/> | GOTERM_BP_ALL         | <a href="#">regulation of gene expression</a>                                                       | <a href="#">RT</a> |  | 41 | 7.4E-1 | 1.0E0  |       |         |           |
| <input type="checkbox"/> | SP_PIR_KEYWORDS       | <a href="#">dna-binding</a>                                                                         | <a href="#">RT</a> |  | 22 | 7.6E-1 | 1.0E0  |       |         |           |



|                          |                 |                                                                                       |          |  |       |         |           |
|--------------------------|-----------------|---------------------------------------------------------------------------------------|----------|--|-------|---------|-----------|
| <input type="checkbox"/> | GOTERM_BP_ALL   | <a href="#">nucleobase, nucleoside, nucleotide and nucleic acid metabolic process</a> | RT       |  | 56    | 8.2E-1  | 1.0E0     |
| <input type="checkbox"/> | GOTERM_MF_ALL   | <a href="#">DNA binding</a>                                                           | RT       |  | 31    | 8.6E-1  | 1.0E0     |
| <input type="checkbox"/> | GOTERM_BP_ALL   | <a href="#">gene expression</a>                                                       | RT       |  | 49    | 9.0E-1  | 1.0E0     |
| <input type="checkbox"/> | GOTERM_MF_ALL   | <a href="#">nucleic acid binding</a>                                                  | RT       |  | 42    | 9.9E-1  | 1.0E0     |
| Annotation Cluster 49    |                 | Enrichment Score: 0.43                                                                | <b>G</b> |  | Count | P_Value | Benjamini |
| <input type="checkbox"/> | INTERPRO        | <a href="#">Basic helix-loop-helix dimerisation region bHLH</a>                       | RT       |  | 4     | 2.7E-1  | 1.0E0     |
| <input type="checkbox"/> | SMART           | <a href="#">HLH</a>                                                                   | RT       |  | 4     | 3.2E-1  | 1.0E0     |
| <input type="checkbox"/> | INTERPRO        | <a href="#">Helix-loop-helix DNA-binding</a>                                          | RT       |  | 3     | 4.1E-1  | 1.0E0     |
| <input type="checkbox"/> | UP_SEQ_FEATURE  | DNA-binding region:Basic motif                                                        | RT       |  | 4     | 4.1E-1  | 1.0E0     |
| <input type="checkbox"/> | UP_SEQ_FEATURE  | domain:Helix-loop-helix motif                                                         | RT       |  | 3     | 4.8E-1  | 1.0E0     |
| Annotation Cluster 50    |                 | Enrichment Score: 0.43                                                                | <b>G</b> |  | Count | P_Value | Benjamini |
| <input type="checkbox"/> | INTERPRO        | <a href="#">Variant SH3</a>                                                           | RT       |  | 3     | 2.4E-1  | 1.0E0     |
| <input type="checkbox"/> | INTERPRO        | <a href="#">SH2 motif</a>                                                             | RT       |  | 4     | 3.1E-1  | 1.0E0     |
| <input type="checkbox"/> | BIOCARTA        | <a href="#">Signaling of Hepatocyte Growth Factor Receptor</a>                        | RT       |  | 3     | 3.1E-1  | 1.0E0     |
| <input type="checkbox"/> | SMART           | <a href="#">SH2</a>                                                                   | RT       |  | 4     | 3.3E-1  | 1.0E0     |
| <input type="checkbox"/> | SP_PIR_KEYWORDS | <a href="#">sh2 domain</a>                                                            | RT       |  | 4     | 3.4E-1  | 1.0E0     |
| <input type="checkbox"/> | INTERPRO        | <a href="#">Src homology-3</a>                                                        | RT       |  | 5     | 4.2E-1  | 1.0E0     |
| <input type="checkbox"/> | SMART           | <a href="#">SH3</a>                                                                   | RT       |  | 5     | 4.7E-1  | 1.0E0     |
| <input type="checkbox"/> | SP_PIR_KEYWORDS | <a href="#">SH3 domain</a>                                                            | RT       |  | 5     | 4.8E-1  | 1.0E0     |
| <input type="checkbox"/> | KEGG_PATHWAY    | <a href="#">MAPK signaling pathway</a>                                                | RT       |  | 7     | 5.9E-1  | 1.0E0     |
| Annotation Cluster 51    |                 | Enrichment Score: 0.42                                                                | <b>G</b> |  | Count | P_Value | Benjamini |
| <input type="checkbox"/> | INTERPRO        | <a href="#">Basic-leucine zipper (bZIP) transcription factor</a>                      | RT       |  | 3     | 2.2E-1  | 1.0E0     |
| <input type="checkbox"/> | SMART           | <a href="#">BRLZ</a>                                                                  | RT       |  | 3     | 2.5E-1  | 1.0E0     |
| <input type="checkbox"/> | GOTERM_MF_ALL   | <a href="#">sequence-specific DNA binding</a>                                         | RT       |  | 6     | 9.5E-1  | 1.0E0     |
| Annotation Cluster 52    |                 | Enrichment Score: 0.42                                                                | <b>G</b> |  | Count | P_Value | Benjamini |
| <input type="checkbox"/> | GOTERM_BP_ALL   | <a href="#">myoblast differentiation</a>                                              | RT       |  | 3     | 1.9E-1  | 1.0E0     |
| <input type="checkbox"/> | GOTERM_BP_ALL   | <a href="#">skeletal muscle development</a>                                           | RT       |  | 4     | 3.2E-1  | 1.0E0     |
| <input type="checkbox"/> | GOTERM_BP_ALL   | <a href="#">skeletal muscle fiber development</a>                                     | RT       |  | 3     | 3.8E-1  | 1.0E0     |
| <input type="checkbox"/> | GOTERM_BP_ALL   | <a href="#">muscle fiber development</a>                                              | RT       |  | 3     | 3.8E-1  | 1.0E0     |
| <input type="checkbox"/> | GOTERM_BP_ALL   | <a href="#">muscle cell differentiation</a>                                           | RT       |  | 3     | 4.2E-1  | 1.0E0     |
| <input type="checkbox"/> | GOTERM_BP_ALL   | <a href="#">muscle development</a>                                                    | RT       |  | 5     | 4.6E-1  | 1.0E0     |
| <input type="checkbox"/> | GOTERM_BP_ALL   | <a href="#">striated muscle development</a>                                           | RT       |  | 4     | 4.8E-1  | 1.0E0     |
| <input type="checkbox"/> | GOTERM_BP_ALL   | <a href="#">cell-cell adhesion</a>                                                    | RT       |  | 6     | 5.1E-1  | 1.0E0     |
| Annotation Cluster 53    |                 | Enrichment Score: 0.42                                                                | <b>G</b> |  | Count | P_Value | Benjamini |
| <input type="checkbox"/> | GOTERM_BP_ALL   | <a href="#">cell cycle checkpoint</a>                                                 | RT       |  | 3     | 1.5E-1  | 1.0E0     |
| <input type="checkbox"/> | GOTERM_BP_ALL   | <a href="#">DNA damage response, signal transduction</a>                              | RT       |  | 3     | 1.7E-1  | 1.0E0     |
| <input type="checkbox"/> | GOTERM_BP_ALL   | <a href="#">M phase</a>                                                               | RT       |  | 7     | 3.0E-1  | 1.0E0     |
| <input type="checkbox"/> | SP_PIR_KEYWORDS | <a href="#">mitosis</a>                                                               | RT       |  | 4     | 3.9E-1  | 1.0E0     |
| <input type="checkbox"/> | GOTERM_BP_ALL   | <a href="#">mitosis</a>                                                               | RT       |  | 5     | 4.5E-1  | 1.0E0     |
| <input type="checkbox"/> | GOTERM_BP_ALL   | <a href="#">M phase of mitotic cell cycle</a>                                         | RT       |  | 5     | 4.5E-1  | 1.0E0     |
| <input type="checkbox"/> | GOTERM_BP_ALL   | <a href="#">cell cycle phase</a>                                                      | RT       |  | 7     | 4.6E-1  | 1.0E0     |
| <input type="checkbox"/> | GOTERM_BP_ALL   | <a href="#">response to DNA damage stimulus</a>                                       | RT       |  | 6     | 5.1E-1  | 1.0E0     |
| <input type="checkbox"/> | GOTERM_BP_ALL   | <a href="#">response to endogenous stimulus</a>                                       | RT       |  | 6     | 6.1E-1  | 1.0E0     |
| <input type="checkbox"/> | GOTERM_BP_ALL   | <a href="#">mitotic cell cycle</a>                                                    | RT       |  | 5     | 6.8E-1  | 1.0E0     |
| Annotation Cluster 54    |                 | Enrichment Score: 0.4                                                                 | <b>G</b> |  | Count | P_Value | Benjamini |
| <input type="checkbox"/> | GOTERM_BP_ALL   | <a href="#">M phase</a>                                                               | RT       |  | 7     | 3.0E-1  | 1.0E0     |
| <input type="checkbox"/> | GOTERM_BP_ALL   | <a href="#">M phase of meiotic cell cycle</a>                                         | RT       |  | 3     | 4.2E-1  | 1.0E0     |
| <input type="checkbox"/> | GOTERM_BP_ALL   | <a href="#">meiosis</a>                                                               | RT       |  | 3     | 4.2E-1  | 1.0E0     |

|                          |                 |                                                       |    |          | Count | P_Value | Benjamini |
|--------------------------|-----------------|-------------------------------------------------------|----|----------|-------|---------|-----------|
| <input type="checkbox"/> | GOTERM_BP_ALL   | <a href="#">meiotic cell cycle</a>                    | RT |          | 3     | 4.2E-1  | 1.0E0     |
| <input type="checkbox"/> | GOTERM_BP_ALL   | <a href="#">cell cycle phase</a>                      | RT |          | 7     | 4.6E-1  | 1.0E0     |
| Annotation Cluster 55    |                 | Enrichment Score: 0.4                                 |    | <b>G</b> |       |         |           |
| <input type="checkbox"/> | GOTERM_CC_ALL   | <a href="#">membrane</a>                              | RT |          | 128   | 1.6E-2  | 6.5E-1    |
| <input type="checkbox"/> | SP_PIR_KEYWORDS | <a href="#">membrane</a>                              | RT |          | 91    | 5.1E-2  | 9.1E-1    |
| <input type="checkbox"/> | GOTERM_CC_ALL   | <a href="#">membrane part</a>                         | RT |          | 99    | 9.3E-2  | 9.3E-1    |
| <input type="checkbox"/> | SP_PIR_KEYWORDS | <a href="#">transmembrane</a>                         | RT |          | 65    | 3.5E-1  | 1.0E0     |
| <input type="checkbox"/> | UP_SEQ_FEATURE  | topological domain:Cytoplasmic                        | RT |          | 38    | 3.8E-1  | 1.0E0     |
| <input type="checkbox"/> | UP_SEQ_FEATURE  | topological domain:Extracellular                      | RT |          | 29    | 4.4E-1  | 1.0E0     |
| <input type="checkbox"/> | UP_SEQ_FEATURE  | transmembrane region                                  | RT |          | 48    | 4.4E-1  | 1.0E0     |
| <input type="checkbox"/> | GOTERM_CC_ALL   | <a href="#">integral to membrane</a>                  | RT |          | 80    | 4.5E-1  | 1.0E0     |
| <input type="checkbox"/> | GOTERM_CC_ALL   | <a href="#">intrinsic to membrane</a>                 | RT |          | 80    | 4.7E-1  | 1.0E0     |
| <input type="checkbox"/> | UP_SEQ_FEATURE  | disulfide bond                                        | RT |          | 33    | 5.6E-1  | 1.0E0     |
| <input type="checkbox"/> | UP_SEQ_FEATURE  | glycosylation site:N-linked (GlcNAc...)               | RT |          | 41    | 8.1E-1  | 1.0E0     |
| <input type="checkbox"/> | SP_PIR_KEYWORDS | <a href="#">glycoprotein</a>                          | RT |          | 46    | 9.1E-1  | 1.0E0     |
| <input type="checkbox"/> | GOTERM_CC_ALL   | <a href="#">extracellular region part</a>             | RT |          | 29    | 9.9E-1  | 1.0E0     |
| <input type="checkbox"/> | GOTERM_CC_ALL   | <a href="#">extracellular region</a>                  | RT |          | 30    | 1.0E0   | 1.0E0     |
| <input type="checkbox"/> | GOTERM_CC_ALL   | <a href="#">extracellular space</a>                   | RT |          | 26    | 1.0E0   | 1.0E0     |
| <input type="checkbox"/> | UP_SEQ_FEATURE  | signal peptide                                        | RT |          | 27    | 1.0E0   | 1.0E0     |
| <input type="checkbox"/> | SP_PIR_KEYWORDS | <a href="#">signal</a>                                | RT |          | 30    | 1.0E0   | 1.0E0     |
| Annotation Cluster 56    |                 | Enrichment Score: 0.39                                |    | <b>G</b> |       |         |           |
| <input type="checkbox"/> | SP_PIR_KEYWORDS | <a href="#">Zymogen</a>                               | RT |          | 8     | 5.7E-2  | 8.9E-1    |
| <input type="checkbox"/> | GOTERM_BP_ALL   | <a href="#">proteolysis</a>                           | RT |          | 19    | 1.1E-1  | 1.0E0     |
| <input type="checkbox"/> | SP_PIR_KEYWORDS | <a href="#">thiol protease</a>                        | RT |          | 5     | 1.4E-1  | 9.8E-1    |
| <input type="checkbox"/> | UP_SEQ_FEATURE  | propeptide:Activation peptide                         | RT |          | 3     | 3.3E-1  | 1.0E0     |
| <input type="checkbox"/> | GOTERM_MF_ALL   | <a href="#">cysteine-type peptidase activity</a>      | RT |          | 5     | 3.5E-1  | 1.0E0     |
| <input type="checkbox"/> | PIR_SUPERFAMILY | PIRSF001135:trypsin                                   | RT |          | 3     | 3.6E-1  | 1.0E0     |
| <input type="checkbox"/> | UP_SEQ_FEATURE  | domain:Peptidase S1                                   | RT |          | 3     | 3.9E-1  | 1.0E0     |
| <input type="checkbox"/> | SP_PIR_KEYWORDS | <a href="#">hydrolase</a>                             | RT |          | 26    | 4.2E-1  | 1.0E0     |
| <input type="checkbox"/> | UP_SEQ_FEATURE  | active site:Charge relay system                       | RT |          | 4     | 4.5E-1  | 1.0E0     |
| <input type="checkbox"/> | SP_PIR_KEYWORDS | <a href="#">serine protease</a>                       | RT |          | 4     | 4.7E-1  | 1.0E0     |
| <input type="checkbox"/> | SP_PIR_KEYWORDS | <a href="#">protease</a>                              | RT |          | 10    | 5.0E-1  | 1.0E0     |
| <input type="checkbox"/> | INTERPRO        | <a href="#">Peptidase S1A, chymotrypsin</a>           | RT |          | 3     | 6.2E-1  | 1.0E0     |
| <input type="checkbox"/> | INTERPRO        | <a href="#">Peptidase S1 and S6, chymotrypsin/Hap</a> | RT |          | 3     | 6.4E-1  | 1.0E0     |
| <input type="checkbox"/> | GOTERM_MF_ALL   | <a href="#">serine-type endopeptidase activity</a>    | RT |          | 4     | 6.9E-1  | 1.0E0     |
| <input type="checkbox"/> | SMART           | <a href="#">Tryp_SPC</a>                              | RT |          | 3     | 6.9E-1  | 1.0E0     |
| <input type="checkbox"/> | GOTERM_MF_ALL   | <a href="#">peptidase activity</a>                    | RT |          | 12    | 7.0E-1  | 1.0E0     |
| <input type="checkbox"/> | GOTERM_MF_ALL   | <a href="#">serine hydrolase activity</a>             | RT |          | 4     | 7.3E-1  | 1.0E0     |
| <input type="checkbox"/> | GOTERM_MF_ALL   | <a href="#">serine-type peptidase activity</a>        | RT |          | 4     | 7.3E-1  | 1.0E0     |
| <input type="checkbox"/> | GOTERM_MF_ALL   | <a href="#">endopeptidase activity</a>                | RT |          | 7     | 8.1E-1  | 1.0E0     |
| Annotation Cluster 57    |                 | Enrichment Score: 0.35                                |    | <b>G</b> |       |         |           |
| <input type="checkbox"/> | INTERPRO        | <a href="#">Immunoglobulin subtype</a>                | RT |          | 7     | 2.1E-1  | 1.0E0     |
| <input type="checkbox"/> | SMART           | <a href="#">IG</a>                                    | RT |          | 7     | 3.1E-1  | 1.0E0     |
| <input type="checkbox"/> | INTERPRO        | <a href="#">Immunoglobulin</a>                        | RT |          | 5     | 3.4E-1  | 1.0E0     |
| <input type="checkbox"/> | INTERPRO        | <a href="#">Immunoglobulin-like</a>                   | RT |          | 7     | 6.1E-1  | 1.0E0     |
| <input type="checkbox"/> | INTERPRO        | <a href="#">Immunoglobulin-like fold</a>              | RT |          | 7     | 6.8E-1  | 1.0E0     |
| <input type="checkbox"/> | SP_PIR_KEYWORDS | <a href="#">immunoglobulin domain</a>                 | RT |          | 5     | 9.0E-1  | 1.0E0     |
| Annotation Cluster 58    |                 | Enrichment Score: 0.34                                |    | <b>G</b> |       |         |           |
| <input type="checkbox"/> | GOTERM_BP_ALL   | <a href="#">glycolysis</a>                            | RT |          | 3     | 2.7E-1  | 1.0E0     |
| <input type="checkbox"/> | GOTERM_BP_ALL   | <a href="#">glucose catabolic process</a>             | RT |          | 3     | 3.2E-1  | 1.0E0     |

|                          |                 |                                                                     |          |  |       |         |           |
|--------------------------|-----------------|---------------------------------------------------------------------|----------|--|-------|---------|-----------|
| <input type="checkbox"/> | GOTERM_BP_ALL   | <a href="#">monosaccharide catabolic process</a>                    | RT       |  | 3     | 3.3E-1  | 1.0E0     |
| <input type="checkbox"/> | GOTERM_BP_ALL   | <a href="#">hexose catabolic process</a>                            | RT       |  | 3     | 3.3E-1  | 1.0E0     |
| <input type="checkbox"/> | GOTERM_BP_ALL   | <a href="#">glucose metabolic process</a>                           | RT       |  | 4     | 3.4E-1  | 1.0E0     |
| <input type="checkbox"/> | GOTERM_BP_ALL   | <a href="#">alcohol catabolic process</a>                           | RT       |  | 3     | 3.4E-1  | 1.0E0     |
| <input type="checkbox"/> | GOTERM_BP_ALL   | <a href="#">cellular carbohydrate catabolic process</a>             | RT       |  | 3     | 4.2E-1  | 1.0E0     |
| <input type="checkbox"/> | GOTERM_BP_ALL   | <a href="#">alcohol metabolic process</a>                           | RT       |  | 7     | 4.2E-1  | 1.0E0     |
| <input type="checkbox"/> | GOTERM_BP_ALL   | <a href="#">carbohydrate catabolic process</a>                      | RT       |  | 3     | 4.5E-1  | 1.0E0     |
| <input type="checkbox"/> | GOTERM_BP_ALL   | <a href="#">hexose metabolic process</a>                            | RT       |  | 4     | 5.2E-1  | 1.0E0     |
| <input type="checkbox"/> | GOTERM_BP_ALL   | <a href="#">monosaccharide metabolic process</a>                    | RT       |  | 4     | 5.3E-1  | 1.0E0     |
| <input type="checkbox"/> | GOTERM_BP_ALL   | <a href="#">carbohydrate metabolic process</a>                      | RT       |  | 6     | 8.8E-1  | 1.0E0     |
| <input type="checkbox"/> | GOTERM_BP_ALL   | <a href="#">cellular carbohydrate metabolic process</a>             | RT       |  | 4     | 9.0E-1  | 1.0E0     |
| <input type="checkbox"/> | GOTERM_MF_ALL   | <a href="#">magnesium ion binding</a>                               | RT       |  | 5     | 9.0E-1  | 1.0E0     |
| Annotation Cluster 59    |                 | Enrichment Score: 0.34                                              | <b>G</b> |  | Count | P_Value | Benjamini |
| <input type="checkbox"/> | SP_PIR_KEYWORDS | <a href="#">basement membrane</a>                                   | RT       |  | 3     | 1.2E-1  | 9.7E-1    |
| <input type="checkbox"/> | SP_PIR_KEYWORDS | <a href="#">calcium binding</a>                                     | RT       |  | 3     | 2.8E-1  | 1.0E0     |
| <input type="checkbox"/> | GOTERM_BP_ALL   | <a href="#">extracellular matrix organization and biogenesis</a>    | RT       |  | 3     | 3.4E-1  | 1.0E0     |
| <input type="checkbox"/> | GOTERM_BP_ALL   | <a href="#">extracellular structure organization and biogenesis</a> | RT       |  | 4     | 3.4E-1  | 1.0E0     |
| <input type="checkbox"/> | GOTERM_CC_ALL   | <a href="#">basement membrane</a>                                   | RT       |  | 3     | 3.5E-1  | 1.0E0     |
| <input type="checkbox"/> | GOTERM_CC_ALL   | <a href="#">extracellular matrix part</a>                           | RT       |  | 3     | 5.8E-1  | 1.0E0     |
| <input type="checkbox"/> | GOTERM_CC_ALL   | <a href="#">proteinaceous extracellular matrix</a>                  | RT       |  | 5     | 7.9E-1  | 1.0E0     |
| <input type="checkbox"/> | GOTERM_CC_ALL   | <a href="#">extracellular matrix</a>                                | RT       |  | 5     | 8.0E-1  | 1.0E0     |
| <input type="checkbox"/> | SP_PIR_KEYWORDS | <a href="#">extracellular matrix</a>                                | RT       |  | 3     | 8.9E-1  | 1.0E0     |
| <input type="checkbox"/> | SP_PIR_KEYWORDS | <a href="#">Secreted</a>                                            | RT       |  | 13    | 9.9E-1  | 1.0E0     |
| Annotation Cluster 60    |                 | Enrichment Score: 0.28                                              | <b>G</b> |  | Count | P_Value | Benjamini |
| <input type="checkbox"/> | GOTERM_BP_ALL   | <a href="#">visual perception</a>                                   | RT       |  | 4     | 3.0E-1  | 1.0E0     |
| <input type="checkbox"/> | GOTERM_BP_ALL   | <a href="#">sensory perception of light stimulus</a>                | RT       |  | 4     | 3.1E-1  | 1.0E0     |
| <input type="checkbox"/> | GOTERM_BP_ALL   | <a href="#">sensory perception of sound</a>                         | RT       |  | 3     | 3.6E-1  | 1.0E0     |
| <input type="checkbox"/> | GOTERM_BP_ALL   | <a href="#">sensory perception of mechanical stimulus</a>           | RT       |  | 3     | 4.2E-1  | 1.0E0     |
| <input type="checkbox"/> | GOTERM_BP_ALL   | <a href="#">sensory perception</a>                                  | RT       |  | 5     | 7.8E-1  | 1.0E0     |
| <input type="checkbox"/> | GOTERM_BP_ALL   | <a href="#">neurological system process</a>                         | RT       |  | 7     | 9.4E-1  | 1.0E0     |
| <input type="checkbox"/> | GOTERM_BP_ALL   | <a href="#">system process</a>                                      | RT       |  | 7     | 9.9E-1  | 1.0E0     |
| Annotation Cluster 61    |                 | Enrichment Score: 0.27                                              | <b>G</b> |  | Count | P_Value | Benjamini |
| <input type="checkbox"/> | GOTERM_BP_ALL   | <a href="#">translational initiation</a>                            | RT       |  | 3     | 2.7E-1  | 1.0E0     |
| <input type="checkbox"/> | SP_PIR_KEYWORDS | <a href="#">initiation factor</a>                                   | RT       |  | 3     | 3.6E-1  | 1.0E0     |
| <input type="checkbox"/> | GOTERM_MF_ALL   | <a href="#">translation initiation factor activity</a>              | RT       |  | 3     | 4.4E-1  | 1.0E0     |
| <input type="checkbox"/> | GOTERM_BP_ALL   | <a href="#">protein-RNA complex assembly</a>                        | RT       |  | 3     | 4.7E-1  | 1.0E0     |
| <input type="checkbox"/> | GOTERM_MF_ALL   | <a href="#">translation factor activity, nucleic acid binding</a>   | RT       |  | 3     | 6.5E-1  | 1.0E0     |
| <input type="checkbox"/> | GOTERM_MF_ALL   | <a href="#">translation regulator activity</a>                      | RT       |  | 3     | 6.8E-1  | 1.0E0     |
| <input type="checkbox"/> | GOTERM_BP_ALL   | <a href="#">translation</a>                                         | RT       |  | 7     | 8.5E-1  | 1.0E0     |
| <input type="checkbox"/> | GOTERM_BP_ALL   | <a href="#">ribonucleoprotein complex biogenesis and assembly</a>   | RT       |  | 3     | 9.0E-1  | 1.0E0     |
| Annotation Cluster 62    |                 | Enrichment Score: 0.27                                              | <b>G</b> |  | Count | P_Value | Benjamini |
| <input type="checkbox"/> | GOTERM_BP_ALL   | <a href="#">regulation of protein metabolic process</a>             | RT       |  | 10    | 7.7E-2  | 1.0E0     |
| <input type="checkbox"/> | GOTERM_BP_ALL   | <a href="#">regulation of translation</a>                           | RT       |  | 4     | 5.4E-1  | 1.0E0     |
| <input type="checkbox"/> | GOTERM_BP_ALL   | <a href="#">regulation of cellular biosynthetic process</a>         | RT       |  | 4     | 5.9E-1  | 1.0E0     |
| <input type="checkbox"/> | GOTERM_BP_ALL   | <a href="#">regulation of biosynthetic process</a>                  | RT       |  | 4     | 6.7E-1  | 1.0E0     |
| <input type="checkbox"/> | GOTERM_BP_ALL   | <a href="#">biosynthetic process</a>                                | RT       |  | 22    | 7.2E-1  | 1.0E0     |
| <input type="checkbox"/> | GOTERM_BP_ALL   | <a href="#">cellular biosynthetic process</a>                       | RT       |  | 15    | 8.3E-1  | 1.0E0     |
| <input type="checkbox"/> | GOTERM_BP_ALL   | <a href="#">translation</a>                                         | RT       |  | 7     | 8.5E-1  | 1.0E0     |

|                          |                       |                                                                         |           |  | Count | P_Value | Benjamini |
|--------------------------|-----------------------|-------------------------------------------------------------------------|-----------|--|-------|---------|-----------|
| <input type="checkbox"/> | <b>GOTERM_BP_ALL</b>  | <a href="#">macromolecule biosynthetic process</a>                      | <b>RT</b> |  | 10    | 9.0E-1  | 1.0E0     |
|                          | Annotation Cluster 63 | Enrichment Score: 0.25                                                  | <b>G</b>  |  |       |         |           |
| <input type="checkbox"/> | <b>GOTERM_CC_ALL</b>  | <a href="#">nucleoplasm</a>                                             | <b>RT</b> |  | 14    | 3.6E-1  | 1.0E0     |
| <input type="checkbox"/> | <b>GOTERM_CC_ALL</b>  | <a href="#">nuclear lumen</a>                                           | <b>RT</b> |  | 16    | 4.2E-1  | 1.0E0     |
| <input type="checkbox"/> | <b>GOTERM_CC_ALL</b>  | <a href="#">organelle lumen</a>                                         | <b>RT</b> |  | 17    | 5.1E-1  | 1.0E0     |
| <input type="checkbox"/> | <b>GOTERM_CC_ALL</b>  | <a href="#">membrane-enclosed lumen</a>                                 | <b>RT</b> |  | 17    | 5.1E-1  | 1.0E0     |
| <input type="checkbox"/> | <b>GOTERM_CC_ALL</b>  | <a href="#">transcription factor complex</a>                            | <b>RT</b> |  | 9     | 5.9E-1  | 1.0E0     |
| <input type="checkbox"/> | <b>GOTERM_CC_ALL</b>  | <a href="#">nucleoplasm part</a>                                        | <b>RT</b> |  | 11    | 6.4E-1  | 1.0E0     |
| <input type="checkbox"/> | <b>GOTERM_CC_ALL</b>  | <a href="#">nuclear part</a>                                            | <b>RT</b> |  | 19    | 7.2E-1  | 1.0E0     |
| <input type="checkbox"/> | <b>GOTERM_BP_ALL</b>  | <a href="#">transcription from RNA polymerase II promoter</a>           | <b>RT</b> |  | 6     | 9.4E-1  | 1.0E0     |
|                          | Annotation Cluster 64 | Enrichment Score: 0.25                                                  | <b>G</b>  |  |       |         |           |
| <input type="checkbox"/> | <b>INTERPRO</b>       | <a href="#">Zinc finger, PHD-type</a>                                   | <b>RT</b> |  | 3     | 4.2E-1  | 1.0E0     |
| <input type="checkbox"/> | <b>SMART</b>          | <a href="#">PHD</a>                                                     | <b>RT</b> |  | 3     | 4.6E-1  | 1.0E0     |
| <input type="checkbox"/> | <b>SMART</b>          | <a href="#">RING</a>                                                    | <b>RT</b> |  | 5     | 6.8E-1  | 1.0E0     |
| <input type="checkbox"/> | <b>INTERPRO</b>       | <a href="#">Zinc finger, RING-type</a>                                  | <b>RT</b> |  | 4     | 7.9E-1  | 1.0E0     |
|                          | Annotation Cluster 65 | Enrichment Score: 0.23                                                  | <b>G</b>  |  |       |         |           |
| <input type="checkbox"/> | <b>GOTERM_BP_ALL</b>  | <a href="#">immune effector process</a>                                 | <b>RT</b> |  | 5     | 2.6E-1  | 1.0E0     |
| <input type="checkbox"/> | <b>GOTERM_BP_ALL</b>  | <a href="#">activation of immune response</a>                           | <b>RT</b> |  | 3     | 4.2E-1  | 1.0E0     |
| <input type="checkbox"/> | <b>GOTERM_BP_ALL</b>  | <a href="#">positive regulation of immune response</a>                  | <b>RT</b> |  | 3     | 5.5E-1  | 1.0E0     |
| <input type="checkbox"/> | <b>GOTERM_BP_ALL</b>  | <a href="#">positive regulation of immune system process</a>            | <b>RT</b> |  | 3     | 5.6E-1  | 1.0E0     |
| <input type="checkbox"/> | <b>GOTERM_BP_ALL</b>  | <a href="#">regulation of immune response</a>                           | <b>RT</b> |  | 3     | 6.2E-1  | 1.0E0     |
| <input type="checkbox"/> | <b>GOTERM_BP_ALL</b>  | <a href="#">regulation of immune system process</a>                     | <b>RT</b> |  | 3     | 6.3E-1  | 1.0E0     |
| <input type="checkbox"/> | <b>GOTERM_BP_ALL</b>  | <a href="#">positive regulation of multicellular organismal process</a> | <b>RT</b> |  | 3     | 6.8E-1  | 1.0E0     |
| <input type="checkbox"/> | <b>GOTERM_BP_ALL</b>  | <a href="#">regulation of multicellular organismal process</a>          | <b>RT</b> |  | 6     | 6.9E-1  | 1.0E0     |
| <input type="checkbox"/> | <b>GOTERM_BP_ALL</b>  | <a href="#">inflammatory response</a>                                   | <b>RT</b> |  | 4     | 8.0E-1  | 1.0E0     |
| <input type="checkbox"/> | <b>GOTERM_BP_ALL</b>  | <a href="#">defense response</a>                                        | <b>RT</b> |  | 5     | 9.7E-1  | 1.0E0     |
|                          | Annotation Cluster 66 | Enrichment Score: 0.2                                                   | <b>G</b>  |  |       |         |           |
| <input type="checkbox"/> | <b>GOTERM_BP_ALL</b>  | <a href="#">cellular homeostasis</a>                                    | <b>RT</b> |  | 6     | 5.1E-1  | 1.0E0     |
| <input type="checkbox"/> | <b>GOTERM_BP_ALL</b>  | <a href="#">homeostatic process</a>                                     | <b>RT</b> |  | 8     | 5.2E-1  | 1.0E0     |
| <input type="checkbox"/> | <b>GOTERM_BP_ALL</b>  | <a href="#">cellular di-, tri-valent inorganic cation homeostasis</a>   | <b>RT</b> |  | 3     | 5.8E-1  | 1.0E0     |
| <input type="checkbox"/> | <b>GOTERM_BP_ALL</b>  | <a href="#">di-, tri-valent inorganic cation homeostasis</a>            | <b>RT</b> |  | 3     | 6.0E-1  | 1.0E0     |
| <input type="checkbox"/> | <b>GOTERM_BP_ALL</b>  | <a href="#">cellular chemical homeostasis</a>                           | <b>RT</b> |  | 4     | 6.4E-1  | 1.0E0     |
| <input type="checkbox"/> | <b>GOTERM_BP_ALL</b>  | <a href="#">cellular ion homeostasis</a>                                | <b>RT</b> |  | 4     | 6.4E-1  | 1.0E0     |
| <input type="checkbox"/> | <b>GOTERM_BP_ALL</b>  | <a href="#">cellular cation homeostasis</a>                             | <b>RT</b> |  | 3     | 6.5E-1  | 1.0E0     |
| <input type="checkbox"/> | <b>GOTERM_BP_ALL</b>  | <a href="#">cation homeostasis</a>                                      | <b>RT</b> |  | 3     | 6.7E-1  | 1.0E0     |
| <input type="checkbox"/> | <b>GOTERM_BP_ALL</b>  | <a href="#">ion homeostasis</a>                                         | <b>RT</b> |  | 4     | 7.1E-1  | 1.0E0     |
| <input type="checkbox"/> | <b>GOTERM_BP_ALL</b>  | <a href="#">chemical homeostasis</a>                                    | <b>RT</b> |  | 4     | 8.2E-1  | 1.0E0     |
|                          | Annotation Cluster 67 | Enrichment Score: 0.18                                                  | <b>G</b>  |  |       |         |           |
| <input type="checkbox"/> | <b>GOTERM_BP_ALL</b>  | <a href="#">mitochondrion organization and biogenesis</a>               | <b>RT</b> |  | 4     | 1.8E-1  | 1.0E0     |
| <input type="checkbox"/> | <b>GOTERM_CC_ALL</b>  | <a href="#">organelle membrane</a>                                      | <b>RT</b> |  | 13    | 5.2E-1  | 1.0E0     |
| <input type="checkbox"/> | <b>GOTERM_CC_ALL</b>  | <a href="#">organelle envelope</a>                                      | <b>RT</b> |  | 8     | 6.7E-1  | 1.0E0     |
| <input type="checkbox"/> | <b>GOTERM_CC_ALL</b>  | <a href="#">envelope</a>                                                | <b>RT</b> |  | 8     | 6.7E-1  | 1.0E0     |
| <input type="checkbox"/> | <b>GOTERM_CC_ALL</b>  | <a href="#">nuclear envelope</a>                                        | <b>RT</b> |  | 3     | 6.8E-1  | 1.0E0     |
| <input type="checkbox"/> | <b>GOTERM_CC_ALL</b>  | <a href="#">mitochondrial membrane</a>                                  | <b>RT</b> |  | 5     | 7.5E-1  | 1.0E0     |
| <input type="checkbox"/> | <b>GOTERM_CC_ALL</b>  | <a href="#">mitochondrial envelope</a>                                  | <b>RT</b> |  | 5     | 8.0E-1  | 1.0E0     |
| <input type="checkbox"/> | <b>GOTERM_CC_ALL</b>  | <a href="#">mitochondrial inner membrane</a>                            | <b>RT</b> |  | 4     | 8.4E-1  | 1.0E0     |
| <input type="checkbox"/> | <b>GOTERM_CC_ALL</b>  | <a href="#">organelle inner membrane</a>                                | <b>RT</b> |  | 4     | 8.6E-1  | 1.0E0     |

| <input type="checkbox"/> | Category              | Term                                                                    | RT       | Bar | Count | P_Value | Benjamini |
|--------------------------|-----------------------|-------------------------------------------------------------------------|----------|-----|-------|---------|-----------|
| <input type="checkbox"/> | GOTERM_CC_ALL         | <a href="#">mitochondrial part</a>                                      | RT       |     | 5     | 8.9E-1  | 1.0E0     |
| <input type="checkbox"/> | SP_PIR_KEYWORDS       | <a href="#">Mitochondrion</a>                                           | RT       |     | 7     | 9.7E-1  | 1.0E0     |
|                          | Annotation Cluster 68 | Enrichment Score: 0.18                                                  | <b>G</b> |     | Count | P_Value | Benjamini |
| <input type="checkbox"/> | GOTERM_BP_ALL         | <a href="#">muscle development</a>                                      | RT       |     | 5     | 4.6E-1  | 1.0E0     |
| <input type="checkbox"/> | GOTERM_BP_ALL         | <a href="#">myeloid cell differentiation</a>                            | RT       |     | 3     | 6.2E-1  | 1.0E0     |
| <input type="checkbox"/> | GOTERM_BP_ALL         | <a href="#">hemopoiesis</a>                                             | RT       |     | 5     | 6.7E-1  | 1.0E0     |
| <input type="checkbox"/> | GOTERM_BP_ALL         | <a href="#">hemopoietic or lymphoid organ development</a>               | RT       |     | 5     | 7.4E-1  | 1.0E0     |
| <input type="checkbox"/> | GOTERM_BP_ALL         | <a href="#">leukocyte differentiation</a>                               | RT       |     | 3     | 7.8E-1  | 1.0E0     |
| <input type="checkbox"/> | GOTERM_BP_ALL         | <a href="#">immune system development</a>                               | RT       |     | 5     | 7.8E-1  | 1.0E0     |
|                          | Annotation Cluster 69 | Enrichment Score: 0.16                                                  | <b>G</b> |     | Count | P_Value | Benjamini |
| <input type="checkbox"/> | INTERPRO              | <a href="#">Pleckstrin-like</a>                                         | RT       |     | 5     | 5.3E-1  | 1.0E0     |
| <input type="checkbox"/> | SMART                 | <a href="#">PH</a>                                                      | RT       |     | 5     | 6.0E-1  | 1.0E0     |
| <input type="checkbox"/> | INTERPRO              | <a href="#">Pleckstrin homology-type</a>                                | RT       |     | 4     | 8.0E-1  | 1.0E0     |
| <input type="checkbox"/> | GOTERM_MF_ALL         | <a href="#">GTPase regulator activity</a>                               | RT       |     | 4     | 9.4E-1  | 1.0E0     |
|                          | Annotation Cluster 70 | Enrichment Score: 0.15                                                  | <b>G</b> |     | Count | P_Value | Benjamini |
| <input type="checkbox"/> | UP_SEQ_FEATURE        | metal ion-binding site:Magnesium                                        | RT       |     | 3     | 4.1E-1  | 1.0E0     |
| <input type="checkbox"/> | GOTERM_MF_ALL         | <a href="#">magnesium ion binding</a>                                   | RT       |     | 5     | 9.0E-1  | 1.0E0     |
| <input type="checkbox"/> | SP_PIR_KEYWORDS       | <a href="#">magnesium</a>                                               | RT       |     | 4     | 9.4E-1  | 1.0E0     |
|                          | Annotation Cluster 71 | Enrichment Score: 0.12                                                  | <b>G</b> |     | Count | P_Value | Benjamini |
| <input type="checkbox"/> | GOTERM_BP_ALL         | <a href="#">secretion</a>                                               | RT       |     | 6     | 7.3E-1  | 1.0E0     |
| <input type="checkbox"/> | GOTERM_BP_ALL         | <a href="#">secretion by cell</a>                                       | RT       |     | 5     | 7.5E-1  | 1.0E0     |
| <input type="checkbox"/> | GOTERM_BP_ALL         | <a href="#">secretory pathway</a>                                       | RT       |     | 4     | 8.0E-1  | 1.0E0     |
|                          | Annotation Cluster 72 | Enrichment Score: 0.09                                                  | <b>G</b> |     | Count | P_Value | Benjamini |
| <input type="checkbox"/> | GOTERM_BP_ALL         | <a href="#">generation of neurons</a>                                   | RT       |     | 7     | 6.1E-1  | 1.0E0     |
| <input type="checkbox"/> | GOTERM_BP_ALL         | <a href="#">neuron differentiation</a>                                  | RT       |     | 6     | 6.7E-1  | 1.0E0     |
| <input type="checkbox"/> | GOTERM_BP_ALL         | <a href="#">neurogenesis</a>                                            | RT       |     | 7     | 6.9E-1  | 1.0E0     |
| <input type="checkbox"/> | GOTERM_BP_ALL         | <a href="#">nervous system development</a>                              | RT       |     | 12    | 6.9E-1  | 1.0E0     |
| <input type="checkbox"/> | GOTERM_BP_ALL         | <a href="#">cellular morphogenesis during differentiation</a>           | RT       |     | 3     | 8.9E-1  | 1.0E0     |
| <input type="checkbox"/> | GOTERM_BP_ALL         | <a href="#">neurite development</a>                                     | RT       |     | 3     | 9.1E-1  | 1.0E0     |
| <input type="checkbox"/> | GOTERM_BP_ALL         | <a href="#">cell part morphogenesis</a>                                 | RT       |     | 4     | 9.1E-1  | 1.0E0     |
| <input type="checkbox"/> | GOTERM_BP_ALL         | <a href="#">cell projection morphogenesis</a>                           | RT       |     | 4     | 9.1E-1  | 1.0E0     |
| <input type="checkbox"/> | GOTERM_BP_ALL         | <a href="#">cell projection organization and biogenesis</a>             | RT       |     | 4     | 9.1E-1  | 1.0E0     |
| <input type="checkbox"/> | GOTERM_BP_ALL         | <a href="#">neuron development</a>                                      | RT       |     | 3     | 9.4E-1  | 1.0E0     |
| <input type="checkbox"/> | GOTERM_BP_ALL         | <a href="#">central nervous system development</a>                      | RT       |     | 3     | 9.5E-1  | 1.0E0     |
|                          | Annotation Cluster 73 | Enrichment Score: 0.06                                                  | <b>G</b> |     | Count | P_Value | Benjamini |
| <input type="checkbox"/> | GOTERM_BP_ALL         | <a href="#">mRNA processing</a>                                         | RT       |     | 4     | 8.1E-1  | 1.0E0     |
| <input type="checkbox"/> | SMART                 | <a href="#">RRM</a>                                                     | RT       |     | 3     | 8.6E-1  | 1.0E0     |
| <input type="checkbox"/> | GOTERM_BP_ALL         | <a href="#">mRNA metabolic process</a>                                  | RT       |     | 4     | 8.7E-1  | 1.0E0     |
| <input type="checkbox"/> | GOTERM_BP_ALL         | <a href="#">RNA processing</a>                                          | RT       |     | 5     | 9.3E-1  | 1.0E0     |
|                          | Annotation Cluster 74 | Enrichment Score: 0.06                                                  | <b>G</b> |     | Count | P_Value | Benjamini |
| <input type="checkbox"/> | GOTERM_BP_ALL         | <a href="#">regulation of signal transduction</a>                       | RT       |     | 7     | 8.3E-1  | 1.0E0     |
| <input type="checkbox"/> | GOTERM_BP_ALL         | <a href="#">regulation of small GTPase mediated signal transduction</a> | RT       |     | 3     | 8.5E-1  | 1.0E0     |
| <input type="checkbox"/> | GOTERM_MF_ALL         | <a href="#">GTPase regulator activity</a>                               | RT       |     | 4     | 9.4E-1  | 1.0E0     |
|                          | Annotation Cluster 75 | Enrichment Score: 0.06                                                  | <b>G</b> |     | Count | P_Value | Benjamini |
| <input type="checkbox"/> | SP_PIR_KEYWORDS       | <a href="#">rna-binding</a>                                             | RT       |     | 7     | 7.2E-1  | 1.0E0     |
| <input type="checkbox"/> | SP_PIR_KEYWORDS       | <a href="#">ribonucleoprotein</a>                                       | RT       |     | 3     | 9.4E-1  | 1.0E0     |
| <input type="checkbox"/> | GOTERM_CC_ALL         | <a href="#">ribonucleoprotein complex</a>                               | RT       |     | 3     | 1.0E0   | 1.0E0     |
|                          | Annotation Cluster 76 | Enrichment Score: 0.05                                                  | <b>G</b> |     | Count | P_Value | Benjamini |
| <input type="checkbox"/> | GOTERM_BP_ALL         | <a href="#">carboxylic acid metabolic process</a>                       | RT       |     | 8     | 8.3E-1  | 1.0E0     |

| <input type="checkbox"/> | Term                                                                                                                       | RT | Count                  | P_Value | Benjamini |
|--------------------------|----------------------------------------------------------------------------------------------------------------------------|----|------------------------|---------|-----------|
| <input type="checkbox"/> | GOTERM_BP_ALL <a href="#">organic acid metabolic process</a>                                                               | RT | 8                      | 8.3E-1  | 1.0E0     |
| <input type="checkbox"/> | GOTERM_BP_ALL <a href="#">amino acid metabolic process</a>                                                                 | RT | 4                      | 8.6E-1  | 1.0E0     |
| <input type="checkbox"/> | GOTERM_BP_ALL <a href="#">amino acid and derivative metabolic process</a>                                                  | RT | 5                      | 8.6E-1  | 1.0E0     |
| <input type="checkbox"/> | GOTERM_BP_ALL <a href="#">monocarboxylic acid metabolic process</a>                                                        | RT | 3                      | 9.3E-1  | 1.0E0     |
| <input type="checkbox"/> | GOTERM_BP_ALL <a href="#">amine metabolic process</a>                                                                      | RT | 5                      | 9.3E-1  | 1.0E0     |
| <input type="checkbox"/> | GOTERM_BP_ALL <a href="#">nitrogen compound metabolic process</a>                                                          | RT | 5                      | 9.5E-1  | 1.0E0     |
| Annotation Cluster 77    |                                                                                                                            |    | Enrichment Score: 0.03 |         |           |
| <input type="checkbox"/> | SP_PIR_KEYWORDS <a href="#">receptor</a>                                                                                   | RT | 18                     | 9.0E-1  | 1.0E0     |
| <input type="checkbox"/> | GOTERM_MF_ALL <a href="#">signal transducer activity</a>                                                                   | RT | 26                     | 9.2E-1  | 1.0E0     |
| <input type="checkbox"/> | GOTERM_MF_ALL <a href="#">molecular transducer activity</a>                                                                | RT | 26                     | 9.2E-1  | 1.0E0     |
| <input type="checkbox"/> | GOTERM_MF_ALL <a href="#">receptor activity</a>                                                                            | RT | 19                     | 9.8E-1  | 1.0E0     |
| Annotation Cluster 78    |                                                                                                                            |    | Enrichment Score: 0.02 |         |           |
| <input type="checkbox"/> | GOTERM_BP_ALL <a href="#">negative regulation of metabolic process</a>                                                     | RT | 6                      | 8.7E-1  | 1.0E0     |
| <input type="checkbox"/> | GOTERM_BP_ALL <a href="#">negative regulation of nucleobase, nucleoside, nucleotide and nucleic acid metabolic process</a> | RT | 3                      | 9.8E-1  | 1.0E0     |
| <input type="checkbox"/> | GOTERM_BP_ALL <a href="#">negative regulation of cellular metabolic process</a>                                            | RT | 3                      | 9.9E-1  | 1.0E0     |
| Annotation Cluster 79    |                                                                                                                            |    | Enrichment Score: 0.02 |         |           |
| <input type="checkbox"/> | INTERPRO <a href="#">Zinc finger, C2H2-like</a>                                                                            | RT | 5                      | 8.9E-1  | 1.0E0     |
| <input type="checkbox"/> | SMART <a href="#">ZnF_C2H2</a>                                                                                             | RT | 5                      | 9.4E-1  | 1.0E0     |
| <input type="checkbox"/> | INTERPRO <a href="#">Zinc finger, C2H2-type/integrase, DNA-binding</a>                                                     | RT | 3                      | 9.7E-1  | 1.0E0     |
| <input type="checkbox"/> | INTERPRO <a href="#">Zinc finger, C2H2-type</a>                                                                            | RT | 5                      | 9.7E-1  | 1.0E0     |
| <input type="checkbox"/> | SP_PIR_KEYWORDS <a href="#">zinc-finger</a>                                                                                | RT | 14                     | 9.9E-1  | 1.0E0     |
| Annotation Cluster 80    |                                                                                                                            |    | Enrichment Score: 0.01 |         |           |
| <input type="checkbox"/> | SP_PIR_KEYWORDS <a href="#">transducer</a>                                                                                 | RT | 6                      | 8.8E-1  | 1.0E0     |
| <input type="checkbox"/> | GOTERM_MF_ALL <a href="#">rhodopsin-like receptor activity</a>                                                             | RT | 3                      | 9.9E-1  | 1.0E0     |
| <input type="checkbox"/> | SP_PIR_KEYWORDS <a href="#">g-protein coupled receptor</a>                                                                 | RT | 3                      | 9.9E-1  | 1.0E0     |
| <input type="checkbox"/> | GOTERM_MF_ALL <a href="#">G-protein coupled receptor activity</a>                                                          | RT | 3                      | 1.0E0   | 1.0E0     |
| <input type="checkbox"/> | GOTERM_MF_ALL <a href="#">transmembrane receptor activity</a>                                                              | RT | 6                      | 1.0E0   | 1.0E0     |
| Annotation Cluster 81    |                                                                                                                            |    | Enrichment Score: 0.01 |         |           |
| <input type="checkbox"/> | GOTERM_MF_ALL <a href="#">metal ion binding</a>                                                                            | RT | 54                     | 9.7E-1  | 1.0E0     |
| <input type="checkbox"/> | GOTERM_MF_ALL <a href="#">ion binding</a>                                                                                  | RT | 55                     | 9.7E-1  | 1.0E0     |
| <input type="checkbox"/> | GOTERM_MF_ALL <a href="#">cation binding</a>                                                                               | RT | 48                     | 9.8E-1  | 1.0E0     |
| <input type="checkbox"/> | SP_PIR_KEYWORDS <a href="#">zinc</a>                                                                                       | RT | 19                     | 9.9E-1  | 1.0E0     |
| <input type="checkbox"/> | SP_PIR_KEYWORDS <a href="#">zinc-finger</a>                                                                                | RT | 14                     | 9.9E-1  | 1.0E0     |
| <input type="checkbox"/> | SP_PIR_KEYWORDS <a href="#">metal-binding</a>                                                                              | RT | 28                     | 9.9E-1  | 1.0E0     |
| <input type="checkbox"/> | GOTERM_MF_ALL <a href="#">transition metal ion binding</a>                                                                 | RT | 30                     | 9.9E-1  | 1.0E0     |
| <input type="checkbox"/> | GOTERM_MF_ALL <a href="#">zinc ion binding</a>                                                                             | RT | 21                     | 1.0E0   | 1.0E0     |

160 terms were not clustered.

Please cite the web site or [Genome Biology 2003; 4\(5\):P3](#) within any publication that makes use of any methods inspired by DAVID.

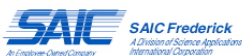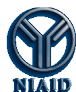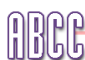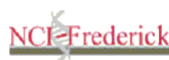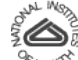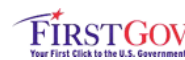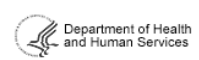

[Term of Service](#) | [Contact Us](#) | [Site Map](#)

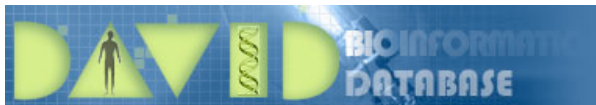

## Functional Annotation Clustering Of Genes Upregulated >2 in WASP Deficient But Not In WT BMMCs

[Help and Manual](#)

Current Gene List: *wsp1* not *wt1* >2up

240 DAVID IDs

Options Classification Stringency Medium

Rerun using options

Create Sublist

[Download File](#)

| Annotation Cluster                                          | Enrichment Score                                                                      |           | Count | P_Value | Benjamini |
|-------------------------------------------------------------|---------------------------------------------------------------------------------------|-----------|-------|---------|-----------|
| <b>Annotation Cluster 1</b> Enrichment Score: 9.14 <b>G</b> |                                                                                       |           |       |         |           |
| <input type="checkbox"/> GOTERM_CC_ALL                      | <a href="#">nucleus</a>                                                               | <b>RT</b> | 91    | 2.2E-14 | 1.7E-11   |
| <input type="checkbox"/> SP_PIR_KEYWORDS                    | <a href="#">nucleus</a>                                                               | <b>RT</b> | 82    | 9.3E-13 | 8.1E-10   |
| <input type="checkbox"/> GOTERM_CC_ALL                      | <a href="#">intracellular organelle</a>                                               | <b>RT</b> | 122   | 2.2E-12 | 8.4E-10   |
| <input type="checkbox"/> GOTERM_CC_ALL                      | <a href="#">organelle</a>                                                             | <b>RT</b> | 122   | 2.3E-12 | 6.0E-10   |
| <input type="checkbox"/> GOTERM_CC_ALL                      | <a href="#">intracellular part</a>                                                    | <b>RT</b> | 133   | 1.6E-11 | 3.0E-9    |
| <input type="checkbox"/> GOTERM_CC_ALL                      | <a href="#">intracellular membrane-bound organelle</a>                                | <b>RT</b> | 112   | 2.6E-11 | 4.0E-9    |
| <input type="checkbox"/> GOTERM_CC_ALL                      | <a href="#">membrane-bound organelle</a>                                              | <b>RT</b> | 112   | 2.8E-11 | 3.7E-9    |
| <input type="checkbox"/> GOTERM_CC_ALL                      | <a href="#">intracellular</a>                                                         | <b>RT</b> | 136   | 5.1E-11 | 5.6E-9    |
| <input type="checkbox"/> GOTERM_CC_ALL                      | <a href="#">cell</a>                                                                  | <b>RT</b> | 150   | 1.4E-4  | 7.8E-3    |
| <input type="checkbox"/> GOTERM_CC_ALL                      | <a href="#">cell part</a>                                                             | <b>RT</b> | 150   | 1.4E-4  | 7.8E-3    |
| <input type="checkbox"/> GOTERM_BP_ALL                      | <a href="#">cellular process</a>                                                      | <b>RT</b> | 140   | 2.2E-2  | 9.0E-1    |
| <b>Annotation Cluster 2</b> Enrichment Score: 4.49 <b>G</b> |                                                                                       |           |       |         |           |
| <input type="checkbox"/> SP_PIR_KEYWORDS                    | <a href="#">nucleus</a>                                                               | <b>RT</b> | 82    | 9.3E-13 | 8.1E-10   |
| <input type="checkbox"/> GOTERM_BP_ALL                      | <a href="#">nucleobase, nucleoside, nucleotide and nucleic acid metabolic process</a> | <b>RT</b> | 76    | 2.7E-9  | 6.9E-6    |
| <input type="checkbox"/> GOTERM_BP_ALL                      | <a href="#">biopolymer metabolic process</a>                                          | <b>RT</b> | 84    | 3.9E-6  | 2.9E-3    |
| <input type="checkbox"/> GOTERM_BP_ALL                      | <a href="#">RNA metabolic process</a>                                                 | <b>RT</b> | 55    | 1.9E-5  | 1.2E-2    |
| <input type="checkbox"/> GOTERM_BP_ALL                      | <a href="#">gene expression</a>                                                       | <b>RT</b> | 59    | 1.6E-4  | 4.5E-2    |
| <input type="checkbox"/> GOTERM_BP_ALL                      | <a href="#">macromolecule metabolic process</a>                                       | <b>RT</b> | 95    | 5.8E-4  | 1.2E-1    |
| <input type="checkbox"/> GOTERM_BP_ALL                      | <a href="#">cellular metabolic process</a>                                            | <b>RT</b> | 100   | 1.0E-2  | 7.1E-1    |
| <input type="checkbox"/> GOTERM_BP_ALL                      | <a href="#">primary metabolic process</a>                                             | <b>RT</b> | 100   | 1.0E-2  | 7.1E-1    |
| <input type="checkbox"/> GOTERM_BP_ALL                      | <a href="#">cellular process</a>                                                      | <b>RT</b> | 140   | 2.2E-2  | 9.0E-1    |
| <input type="checkbox"/> GOTERM_BP_ALL                      | <a href="#">metabolic process</a>                                                     | <b>RT</b> | 106   | 3.4E-2  | 9.6E-1    |
| <b>Annotation Cluster 3</b> Enrichment Score: 4.35 <b>G</b> |                                                                                       |           |       |         |           |
| <input type="checkbox"/> GOTERM_CC_ALL                      | <a href="#">intracellular organelle part</a>                                          | <b>RT</b> | 57    | 4.6E-8  | 4.5E-6    |
| <input type="checkbox"/> GOTERM_CC_ALL                      | <a href="#">organelle part</a>                                                        | <b>RT</b> | 57    | 5.4E-8  | 4.6E-6    |
| <input type="checkbox"/> GOTERM_CC_ALL                      | <a href="#">nuclear part</a>                                                          | <b>RT</b> | 31    | 3.0E-6  | 2.1E-4    |
| <input type="checkbox"/> GOTERM_CC_ALL                      | <a href="#">macromolecular complex</a>                                                | <b>RT</b> | 41    | 4.1E-4  | 1.8E-2    |
| <input type="checkbox"/> GOTERM_CC_ALL                      | <a href="#">intracellular non-membrane-bound organelle</a>                            | <b>RT</b> | 31    | 1.0E-3  | 3.7E-2    |
| <input type="checkbox"/> GOTERM_CC_ALL                      | <a href="#">non-membrane-bound organelle</a>                                          | <b>RT</b> | 31    | 1.0E-3  | 3.7E-2    |
| <input type="checkbox"/> GOTERM_CC_ALL                      | <a href="#">protein complex</a>                                                       | <b>RT</b> | 26    | 1.1E-1  | 8.7E-1    |
| <b>Annotation Cluster 4</b> Enrichment Score: 4.27 <b>G</b> |                                                                                       |           |       |         |           |
| <input type="checkbox"/> GOTERM_BP_ALL                      | <a href="#">RNA processing</a>                                                        | <b>RT</b> | 24    | 3.4E-10 | 1.7E-6    |
| <input type="checkbox"/> GOTERM_BP_ALL                      | <a href="#">mRNA processing</a>                                                       | <b>RT</b> | 18    | 5.0E-9  | 8.6E-6    |
| <input type="checkbox"/> GOTERM_BP_ALL                      | <a href="#">mRNA metabolic process</a>                                                | <b>RT</b> | 19    | 5.6E-9  | 7.2E-6    |
| <input type="checkbox"/> SP_PIR_KEYWORDS                    | <a href="#">mrna processing</a>                                                       | <b>RT</b> | 16    | 2.1E-8  | 9.2E-6    |
| <input type="checkbox"/> GOTERM_BP_ALL                      | <a href="#">RNA splicing</a>                                                          | <b>RT</b> | 15    | 7.4E-8  | 7.7E-5    |
| <input type="checkbox"/> GOTERM_CC_ALL                      | <a href="#">spliceosome</a>                                                           | <b>RT</b> | 11    | 2.3E-6  | 1.8E-4    |
| <input type="checkbox"/> SP_PIR_KEYWORDS                    | <a href="#">mrna splicing</a>                                                         | <b>RT</b> | 12    | 3.3E-6  | 9.7E-4    |

|                          |                 |                                                                                                      |                    |  |       |         |           |
|--------------------------|-----------------|------------------------------------------------------------------------------------------------------|--------------------|--|-------|---------|-----------|
| <input type="checkbox"/> | GOTERM_CC_ALL   | <a href="#">ribonucleoprotein complex</a>                                                            | <a href="#">RT</a> |  | 17    | 2.5E-5  | 1.6E-3    |
| <input type="checkbox"/> | SP_PIR_KEYWORDS | <a href="#">spliceosome</a>                                                                          | <a href="#">RT</a> |  | 9     | 3.8E-5  | 6.5E-3    |
| <input type="checkbox"/> | GOTERM_BP_ALL   | <a href="#">RNA splicing, via transesterification reactions with bulged adenosine as nucleophile</a> | <a href="#">RT</a> |  | 7     | 6.4E-5  | 3.0E-2    |
| <input type="checkbox"/> | GOTERM_BP_ALL   | <a href="#">RNA splicing, via transesterification reactions</a>                                      | <a href="#">RT</a> |  | 7     | 6.4E-5  | 3.0E-2    |
| <input type="checkbox"/> | GOTERM_BP_ALL   | <a href="#">nuclear mRNA splicing, via spliceosome</a>                                               | <a href="#">RT</a> |  | 7     | 6.4E-5  | 3.0E-2    |
| <input type="checkbox"/> | GOTERM_BP_ALL   | <a href="#">spliceosome assembly</a>                                                                 | <a href="#">RT</a> |  | 4     | 3.5E-3  | 4.8E-1    |
| <input type="checkbox"/> | GOTERM_BP_ALL   | <a href="#">ribonucleoprotein complex biogenesis and assembly</a>                                    | <a href="#">RT</a> |  | 9     | 4.3E-3  | 5.2E-1    |
| <input type="checkbox"/> | GOTERM_BP_ALL   | <a href="#">macromolecular complex assembly</a>                                                      | <a href="#">RT</a> |  | 11    | 1.1E-2  | 7.3E-1    |
| <input type="checkbox"/> | GOTERM_BP_ALL   | <a href="#">protein-RNA complex assembly</a>                                                         | <a href="#">RT</a> |  | 5     | 2.2E-2  | 8.9E-1    |
| <input type="checkbox"/> | GOTERM_BP_ALL   | <a href="#">cellular component assembly</a>                                                          | <a href="#">RT</a> |  | 11    | 3.1E-2  | 9.5E-1    |
| <input type="checkbox"/> | SMART           | <a href="#">RRM</a>                                                                                  | <a href="#">RT</a> |  | 4     | 2.0E-1  | 1.0E0     |
| <input type="checkbox"/> | INTERPRO        | <a href="#">Nucleotide-binding, alpha-beta plait</a>                                                 | <a href="#">RT</a> |  | 4     | 2.5E-1  | 1.0E0     |
| <input type="checkbox"/> | INTERPRO        | <a href="#">RNA recognition motif, RNP-1</a>                                                         | <a href="#">RT</a> |  | 4     | 2.5E-1  | 1.0E0     |
| Annotation Cluster 5     |                 | Enrichment Score: 3.61                                                                               | <b>G</b>           |  | Count | P_Value | Benjamini |
| <input type="checkbox"/> | SP_PIR_KEYWORDS | <a href="#">mitosis</a>                                                                              | <a href="#">RT</a> |  | 10    | 2.2E-5  | 4.7E-3    |
| <input type="checkbox"/> | GOTERM_BP_ALL   | <a href="#">mitotic cell cycle</a>                                                                   | <a href="#">RT</a> |  | 13    | 6.5E-5  | 2.6E-2    |
| <input type="checkbox"/> | GOTERM_BP_ALL   | <a href="#">cell cycle</a>                                                                           | <a href="#">RT</a> |  | 23    | 1.0E-4  | 3.6E-2    |
| <input type="checkbox"/> | GOTERM_BP_ALL   | <a href="#">mitosis</a>                                                                              | <a href="#">RT</a> |  | 11    | 1.1E-4  | 3.6E-2    |
| <input type="checkbox"/> | GOTERM_BP_ALL   | <a href="#">M phase of mitotic cell cycle</a>                                                        | <a href="#">RT</a> |  | 11    | 1.1E-4  | 3.5E-2    |
| <input type="checkbox"/> | GOTERM_BP_ALL   | <a href="#">cell cycle process</a>                                                                   | <a href="#">RT</a> |  | 20    | 1.2E-4  | 3.6E-2    |
| <input type="checkbox"/> | SP_PIR_KEYWORDS | <a href="#">cell cycle</a>                                                                           | <a href="#">RT</a> |  | 15    | 2.0E-4  | 2.5E-2    |
| <input type="checkbox"/> | GOTERM_BP_ALL   | <a href="#">cell cycle phase</a>                                                                     | <a href="#">RT</a> |  | 13    | 3.0E-4  | 7.1E-2    |
| <input type="checkbox"/> | SP_PIR_KEYWORDS | <a href="#">cell division</a>                                                                        | <a href="#">RT</a> |  | 10    | 6.6E-4  | 6.1E-2    |
| <input type="checkbox"/> | GOTERM_BP_ALL   | <a href="#">M phase</a>                                                                              | <a href="#">RT</a> |  | 11    | 1.0E-3  | 1.9E-1    |
| <input type="checkbox"/> | GOTERM_BP_ALL   | <a href="#">cell division</a>                                                                        | <a href="#">RT</a> |  | 11    | 1.0E-3  | 1.9E-1    |
| <input type="checkbox"/> | GOTERM_BP_ALL   | <a href="#">chromosome segregation</a>                                                               | <a href="#">RT</a> |  | 5     | 5.4E-3  | 5.8E-1    |
| Annotation Cluster 6     |                 | Enrichment Score: 3.25                                                                               | <b>G</b>           |  | Count | P_Value | Benjamini |
| <input type="checkbox"/> | GOTERM_BP_ALL   | <a href="#">DNA metabolic process</a>                                                                | <a href="#">RT</a> |  | 24    | 2.7E-6  | 2.3E-3    |
| <input type="checkbox"/> | SP_PIR_KEYWORDS | <a href="#">DNA damage</a>                                                                           | <a href="#">RT</a> |  | 10    | 6.8E-5  | 9.8E-3    |
| <input type="checkbox"/> | SP_PIR_KEYWORDS | <a href="#">DNA repair</a>                                                                           | <a href="#">RT</a> |  | 9     | 2.1E-4  | 2.3E-2    |
| <input type="checkbox"/> | GOTERM_BP_ALL   | <a href="#">DNA repair</a>                                                                           | <a href="#">RT</a> |  | 11    | 2.2E-4  | 5.7E-2    |
| <input type="checkbox"/> | GOTERM_BP_ALL   | <a href="#">response to endogenous stimulus</a>                                                      | <a href="#">RT</a> |  | 13    | 2.4E-4  | 6.0E-2    |
| <input type="checkbox"/> | GOTERM_BP_ALL   | <a href="#">response to DNA damage stimulus</a>                                                      | <a href="#">RT</a> |  | 12    | 3.1E-4  | 7.1E-2    |
| <input type="checkbox"/> | GOTERM_BP_ALL   | <a href="#">response to stress</a>                                                                   | <a href="#">RT</a> |  | 17    | 5.2E-2  | 9.9E-1    |
| <input type="checkbox"/> | GOTERM_BP_ALL   | <a href="#">response to stimulus</a>                                                                 | <a href="#">RT</a> |  | 26    | 2.9E-1  | 1.0E0     |
| Annotation Cluster 7     |                 | Enrichment Score: 2.46                                                                               | <b>G</b>           |  | Count | P_Value | Benjamini |
| <input type="checkbox"/> | KEGG_PATHWAY    | <a href="#">Pyrimidine metabolism</a>                                                                | <a href="#">RT</a> |  | 6     | 7.8E-4  | 1.5E-1    |
| <input type="checkbox"/> | KEGG_PATHWAY    | <a href="#">DNA polymerase</a>                                                                       | <a href="#">RT</a> |  | 4     | 1.1E-3  | 1.1E-1    |
| <input type="checkbox"/> | SP_PIR_KEYWORDS | <a href="#">DNA-directed DNA polymerase</a>                                                          | <a href="#">RT</a> |  | 4     | 1.9E-3  | 1.4E-1    |
| <input type="checkbox"/> | GOTERM_MF_ALL   | <a href="#">DNA-directed DNA polymerase activity</a>                                                 | <a href="#">RT</a> |  | 4     | 4.4E-3  | 1.0E0     |
| <input type="checkbox"/> | KEGG_PATHWAY    | <a href="#">Purine metabolism</a>                                                                    | <a href="#">RT</a> |  | 6     | 6.3E-3  | 3.6E-1    |
| <input type="checkbox"/> | GOTERM_MF_ALL   | <a href="#">nucleotidyltransferase activity</a>                                                      | <a href="#">RT</a> |  | 6     | 1.1E-2  | 1.0E0     |
| <input type="checkbox"/> | SP_PIR_KEYWORDS | <a href="#">Nucleotidyltransferase</a>                                                               | <a href="#">RT</a> |  | 5     | 1.2E-2  | 4.6E-1    |
| Annotation Cluster 8     |                 | Enrichment Score: 2.34                                                                               | <b>G</b>           |  | Count | P_Value | Benjamini |
| <input type="checkbox"/> | GOTERM_CC_ALL   | <a href="#">microtubule cytoskeleton</a>                                                             | <a href="#">RT</a> |  | 13    | 2.6E-4  | 1.2E-2    |
| <input type="checkbox"/> | GOTERM_CC_ALL   | <a href="#">centrosome</a>                                                                           | <a href="#">RT</a> |  | 6     | 5.6E-4  | 2.2E-2    |
| <input type="checkbox"/> | GOTERM_CC_ALL   | <a href="#">microtubule organizing center</a>                                                        | <a href="#">RT</a> |  | 6     | 1.5E-3  | 5.3E-2    |
| <input type="checkbox"/> | GOTERM_BP_ALL   | <a href="#">centrosome cycle</a>                                                                     | <a href="#">RT</a> |  | 3     | 7.8E-3  | 6.5E-1    |



| <input type="checkbox"/> |                       |                                                                                                     |          |  |  |  |  |  |  |       |         |           |
|--------------------------|-----------------------|-----------------------------------------------------------------------------------------------------|----------|--|--|--|--|--|--|-------|---------|-----------|
| <input type="checkbox"/> | GOTERM_CC_ALL         | <a href="#">cytoskeletal part</a>                                                                   | RT       |  |  |  |  |  |  | 14    | 8.4E-3  | 2.1E-1    |
| <input type="checkbox"/> | GOTERM_BP_ALL         | <a href="#">centrosome organization and biogenesis</a>                                              | RT       |  |  |  |  |  |  | 3     | 1.3E-2  | 7.6E-1    |
| <input type="checkbox"/> | GOTERM_BP_ALL         | <a href="#">microtubule organizing center organization and biogenesis</a>                           | RT       |  |  |  |  |  |  | 3     | 1.4E-2  | 7.8E-1    |
| <input type="checkbox"/> | GOTERM_CC_ALL         | <a href="#">cytoskeleton</a>                                                                        | RT       |  |  |  |  |  |  | 16    | 7.3E-2  | 7.9E-1    |
|                          | Annotation Cluster 9  | Enrichment Score: 2.17                                                                              | <b>G</b> |  |  |  |  |  |  | Count | P_Value | Benjamini |
| <input type="checkbox"/> | GOTERM_CC_ALL         | <a href="#">nuclear chromosome part</a>                                                             | RT       |  |  |  |  |  |  | 7     | 1.7E-4  | 8.6E-3    |
| <input type="checkbox"/> | GOTERM_CC_ALL         | <a href="#">nuclear chromosome</a>                                                                  | RT       |  |  |  |  |  |  | 7     | 4.9E-4  | 2.1E-2    |
| <input type="checkbox"/> | GOTERM_CC_ALL         | <a href="#">chromosome</a>                                                                          | RT       |  |  |  |  |  |  | 11    | 3.7E-3  | 1.2E-1    |
| <input type="checkbox"/> | GOTERM_CC_ALL         | <a href="#">chromosomal part</a>                                                                    | RT       |  |  |  |  |  |  | 10    | 4.7E-3  | 1.4E-1    |
| <input type="checkbox"/> | GOTERM_CC_ALL         | <a href="#">chromosome, pericentric region</a>                                                      | RT       |  |  |  |  |  |  | 5     | 6.8E-3  | 1.8E-1    |
| <input type="checkbox"/> | GOTERM_CC_ALL         | <a href="#">condensed chromosome</a>                                                                | RT       |  |  |  |  |  |  | 4     | 2.5E-2  | 4.6E-1    |
| <input type="checkbox"/> | GOTERM_CC_ALL         | <a href="#">condensed nuclear chromosome</a>                                                        | RT       |  |  |  |  |  |  | 3     | 6.2E-2  | 7.4E-1    |
| <input type="checkbox"/> | GOTERM_CC_ALL         | <a href="#">chromatin</a>                                                                           | RT       |  |  |  |  |  |  | 4     | 2.8E-1  | 9.9E-1    |
|                          | Annotation Cluster 10 | Enrichment Score: 1.99                                                                              | <b>G</b> |  |  |  |  |  |  | Count | P_Value | Benjamini |
| <input type="checkbox"/> | GOTERM_BP_ALL         | <a href="#">DNA-dependent DNA replication</a>                                                       | RT       |  |  |  |  |  |  | 5     | 5.7E-3  | 5.8E-1    |
| <input type="checkbox"/> | GOTERM_BP_ALL         | <a href="#">mismatch repair</a>                                                                     | RT       |  |  |  |  |  |  | 3     | 1.3E-2  | 7.6E-1    |
| <input type="checkbox"/> | GOTERM_BP_ALL         | <a href="#">maintenance of fidelity during DNA-dependent DNA replication</a>                        | RT       |  |  |  |  |  |  | 3     | 1.4E-2  | 7.8E-1    |
|                          | Annotation Cluster 11 | Enrichment Score: 1.79                                                                              | <b>G</b> |  |  |  |  |  |  | Count | P_Value | Benjamini |
| <input type="checkbox"/> | GOTERM_BP_ALL         | <a href="#">nucleobase, nucleoside, nucleotide and nucleic acid metabolic process</a>               | RT       |  |  |  |  |  |  | 76    | 2.7E-9  | 6.9E-6    |
| <input type="checkbox"/> | GOTERM_BP_ALL         | <a href="#">biopolymer metabolic process</a>                                                        | RT       |  |  |  |  |  |  | 84    | 3.9E-6  | 2.9E-3    |
| <input type="checkbox"/> | GOTERM_BP_ALL         | <a href="#">RNA metabolic process</a>                                                               | RT       |  |  |  |  |  |  | 55    | 1.9E-5  | 1.2E-2    |
| <input type="checkbox"/> | GOTERM_BP_ALL         | <a href="#">gene expression</a>                                                                     | RT       |  |  |  |  |  |  | 59    | 1.6E-4  | 4.5E-2    |
| <input type="checkbox"/> | GOTERM_MF_ALL         | <a href="#">nucleic acid binding</a>                                                                | RT       |  |  |  |  |  |  | 48    | 1.7E-2  | 1.0E0     |
| <input type="checkbox"/> | GOTERM_MF_ALL         | <a href="#">DNA binding</a>                                                                         | RT       |  |  |  |  |  |  | 31    | 5.6E-2  | 1.0E0     |
| <input type="checkbox"/> | GOTERM_BP_ALL         | <a href="#">transcription</a>                                                                       | RT       |  |  |  |  |  |  | 37    | 6.7E-2  | 1.0E0     |
| <input type="checkbox"/> | GOTERM_BP_ALL         | <a href="#">regulation of nucleobase, nucleoside, nucleotide and nucleic acid metabolic process</a> | RT       |  |  |  |  |  |  | 36    | 8.2E-2  | 1.0E0     |
| <input type="checkbox"/> | GOTERM_BP_ALL         | <a href="#">regulation of cellular metabolic process</a>                                            | RT       |  |  |  |  |  |  | 38    | 1.1E-1  | 1.0E0     |
| <input type="checkbox"/> | GOTERM_BP_ALL         | <a href="#">transcription, DNA-dependent</a>                                                        | RT       |  |  |  |  |  |  | 33    | 1.3E-1  | 1.0E0     |
| <input type="checkbox"/> | GOTERM_BP_ALL         | <a href="#">regulation of gene expression</a>                                                       | RT       |  |  |  |  |  |  | 36    | 1.3E-1  | 1.0E0     |
| <input type="checkbox"/> | GOTERM_BP_ALL         | <a href="#">RNA biosynthetic process</a>                                                            | RT       |  |  |  |  |  |  | 33    | 1.4E-1  | 1.0E0     |
| <input type="checkbox"/> | GOTERM_BP_ALL         | <a href="#">regulation of transcription</a>                                                         | RT       |  |  |  |  |  |  | 34    | 1.4E-1  | 1.0E0     |
| <input type="checkbox"/> | GOTERM_BP_ALL         | <a href="#">regulation of metabolic process</a>                                                     | RT       |  |  |  |  |  |  | 38    | 1.6E-1  | 1.0E0     |
| <input type="checkbox"/> | SP_PIR_KEYWORDS       | <a href="#">Transcription</a>                                                                       | RT       |  |  |  |  |  |  | 21    | 1.9E-1  | 1.0E0     |
| <input type="checkbox"/> | GOTERM_BP_ALL         | <a href="#">regulation of transcription, DNA-dependent</a>                                          | RT       |  |  |  |  |  |  | 31    | 2.2E-1  | 1.0E0     |
| <input type="checkbox"/> | SP_PIR_KEYWORDS       | <a href="#">Transcription regulation</a>                                                            | RT       |  |  |  |  |  |  | 20    | 2.4E-1  | 1.0E0     |
| <input type="checkbox"/> | GOTERM_BP_ALL         | <a href="#">regulation of cellular process</a>                                                      | RT       |  |  |  |  |  |  | 50    | 3.1E-1  | 1.0E0     |
| <input type="checkbox"/> | GOTERM_BP_ALL         | <a href="#">regulation of biological process</a>                                                    | RT       |  |  |  |  |  |  | 50    | 6.3E-1  | 1.0E0     |
| <input type="checkbox"/> | GOTERM_BP_ALL         | <a href="#">biological regulation</a>                                                               | RT       |  |  |  |  |  |  | 54    | 6.8E-1  | 1.0E0     |
|                          | Annotation Cluster 12 | Enrichment Score: 1.78                                                                              | <b>G</b> |  |  |  |  |  |  | Count | P_Value | Benjamini |
| <input type="checkbox"/> | INTERPRO              | <a href="#">Tetratricopeptide-like helical</a>                                                      | RT       |  |  |  |  |  |  | 7     | 1.3E-3  | 1.0E0     |
| <input type="checkbox"/> | SMART                 | <a href="#">TPR</a>                                                                                 | RT       |  |  |  |  |  |  | 6     | 1.7E-3  | 6.3E-1    |
| <input type="checkbox"/> | INTERPRO              | <a href="#">Tetratricopeptide region</a>                                                            | RT       |  |  |  |  |  |  | 6     | 4.4E-3  | 1.0E0     |
| <input type="checkbox"/> | INTERPRO              | <a href="#">Tetratricopeptide TPR-1</a>                                                             | RT       |  |  |  |  |  |  | 5     | 1.0E-2  | 1.0E0     |
| <input type="checkbox"/> | UP_SEQ_FEATURE        | repeat:TPR 4                                                                                        | RT       |  |  |  |  |  |  | 4     | 1.1E-2  | 1.0E0     |
| <input type="checkbox"/> | SP_PIR_KEYWORDS       | <a href="#">TPR repeat</a>                                                                          | RT       |  |  |  |  |  |  | 6     | 1.4E-2  | 4.8E-1    |
| <input type="checkbox"/> | UP_SEQ_FEATURE        | repeat:TPR 3                                                                                        | RT       |  |  |  |  |  |  | 4     | 3.0E-2  | 1.0E0     |
| <input type="checkbox"/> | UP_SEQ_FEATURE        | repeat:TPR 2                                                                                        | RT       |  |  |  |  |  |  | 4     | 3.7E-2  | 1.0E0     |

| <input type="checkbox"/> |                       |                                                                               |                    |  |  |  |       |         |           |
|--------------------------|-----------------------|-------------------------------------------------------------------------------|--------------------|--|--|--|-------|---------|-----------|
| <input type="checkbox"/> | UP_SEQ_FEATURE        | repeat:TPR 1                                                                  | <a href="#">RT</a> |  |  |  | 4     | 3.7E-2  | 1.0E0     |
| <input type="checkbox"/> | UP_SEQ_FEATURE        | repeat:TPR 7                                                                  | <a href="#">RT</a> |  |  |  | 3     | 4.4E-2  | 1.0E0     |
| <input type="checkbox"/> | UP_SEQ_FEATURE        | repeat:TPR 6                                                                  | <a href="#">RT</a> |  |  |  | 3     | 5.0E-2  | 1.0E0     |
| <input type="checkbox"/> | UP_SEQ_FEATURE        | repeat:TPR 5                                                                  | <a href="#">RT</a> |  |  |  | 3     | 5.3E-2  | 1.0E0     |
| <input type="checkbox"/> | INTERPRO              | <a href="#">Tetratricopeptide TPR2</a>                                        | <a href="#">RT</a> |  |  |  | 3     | 1.1E-1  | 1.0E0     |
|                          | Annotation Cluster 13 | Enrichment Score: 1.77                                                        | <b>G</b>           |  |  |  | Count | P_Value | Benjamini |
| <input type="checkbox"/> | GOTERM_BP_ALL         | <a href="#">nucleocytoplasmic transport</a>                                   | <a href="#">RT</a> |  |  |  | 7     | 3.5E-3  | 4.9E-1    |
| <input type="checkbox"/> | GOTERM_BP_ALL         | <a href="#">nuclear transport</a>                                             | <a href="#">RT</a> |  |  |  | 7     | 3.6E-3  | 4.8E-1    |
| <input type="checkbox"/> | GOTERM_BP_ALL         | <a href="#">mRNA transport</a>                                                | <a href="#">RT</a> |  |  |  | 5     | 5.1E-3  | 5.7E-1    |
| <input type="checkbox"/> | GOTERM_BP_ALL         | <a href="#">nucleic acid transport</a>                                        | <a href="#">RT</a> |  |  |  | 5     | 6.9E-3  | 6.3E-1    |
| <input type="checkbox"/> | GOTERM_BP_ALL         | <a href="#">RNA transport</a>                                                 | <a href="#">RT</a> |  |  |  | 5     | 6.9E-3  | 6.3E-1    |
| <input type="checkbox"/> | GOTERM_BP_ALL         | <a href="#">establishment of RNA localization</a>                             | <a href="#">RT</a> |  |  |  | 5     | 6.9E-3  | 6.3E-1    |
| <input type="checkbox"/> | GOTERM_BP_ALL         | <a href="#">RNA localization</a>                                              | <a href="#">RT</a> |  |  |  | 5     | 7.3E-3  | 6.3E-1    |
| <input type="checkbox"/> | GOTERM_BP_ALL         | <a href="#">nucleobase, nucleoside, nucleotide and nucleic acid transport</a> | <a href="#">RT</a> |  |  |  | 5     | 8.6E-3  | 6.7E-1    |
| <input type="checkbox"/> | GOTERM_BP_ALL         | <a href="#">nuclear export</a>                                                | <a href="#">RT</a> |  |  |  | 4     | 1.1E-2  | 7.2E-1    |
| <input type="checkbox"/> | SP_PIR_KEYWORDS       | <a href="#">mrna transport</a>                                                | <a href="#">RT</a> |  |  |  | 4     | 1.5E-2  | 5.1E-1    |
| <input type="checkbox"/> | GOTERM_BP_ALL         | <a href="#">nuclear import</a>                                                | <a href="#">RT</a> |  |  |  | 3     | 2.2E-1  | 1.0E0     |
| <input type="checkbox"/> | GOTERM_BP_ALL         | <a href="#">intracellular protein transport</a>                               | <a href="#">RT</a> |  |  |  | 8     | 3.0E-1  | 1.0E0     |
| <input type="checkbox"/> | GOTERM_CC_ALL         | <a href="#">endomembrane system</a>                                           | <a href="#">RT</a> |  |  |  | 5     | 6.5E-1  | 1.0E0     |
|                          | Annotation Cluster 14 | Enrichment Score: 1.7                                                         | <b>G</b>           |  |  |  | Count | P_Value | Benjamini |
| <input type="checkbox"/> | GOTERM_CC_ALL         | <a href="#">microtubule cytoskeleton</a>                                      | <a href="#">RT</a> |  |  |  | 13    | 2.6E-4  | 1.2E-2    |
| <input type="checkbox"/> | GOTERM_CC_ALL         | <a href="#">intracellular non-membrane-bound organelle</a>                    | <a href="#">RT</a> |  |  |  | 31    | 1.0E-3  | 3.7E-2    |
| <input type="checkbox"/> | GOTERM_CC_ALL         | <a href="#">non-membrane-bound organelle</a>                                  | <a href="#">RT</a> |  |  |  | 31    | 1.0E-3  | 3.7E-2    |
| <input type="checkbox"/> | SP_PIR_KEYWORDS       | <a href="#">microtubule</a>                                                   | <a href="#">RT</a> |  |  |  | 8     | 2.6E-3  | 1.6E-1    |
| <input type="checkbox"/> | GOTERM_CC_ALL         | <a href="#">microtubule</a>                                                   | <a href="#">RT</a> |  |  |  | 8     | 6.5E-3  | 1.8E-1    |
| <input type="checkbox"/> | GOTERM_CC_ALL         | <a href="#">cytoskeletal part</a>                                             | <a href="#">RT</a> |  |  |  | 14    | 8.4E-3  | 2.1E-1    |
| <input type="checkbox"/> | GOTERM_CC_ALL         | <a href="#">cytoskeleton</a>                                                  | <a href="#">RT</a> |  |  |  | 16    | 7.3E-2  | 7.9E-1    |
| <input type="checkbox"/> | GOTERM_BP_ALL         | <a href="#">microtubule-based process</a>                                     | <a href="#">RT</a> |  |  |  | 6     | 9.9E-2  | 1.0E0     |
| <input type="checkbox"/> | GOTERM_BP_ALL         | <a href="#">microtubule cytoskeleton organization and biogenesis</a>          | <a href="#">RT</a> |  |  |  | 3     | 2.4E-1  | 1.0E0     |
| <input type="checkbox"/> | GOTERM_BP_ALL         | <a href="#">microtubule-based movement</a>                                    | <a href="#">RT</a> |  |  |  | 3     | 3.7E-1  | 1.0E0     |
| <input type="checkbox"/> | GOTERM_BP_ALL         | <a href="#">cytoskeleton organization and biogenesis</a>                      | <a href="#">RT</a> |  |  |  | 8     | 4.2E-1  | 1.0E0     |
| <input type="checkbox"/> | GOTERM_BP_ALL         | <a href="#">cytoskeleton-dependent intracellular transport</a>                | <a href="#">RT</a> |  |  |  | 3     | 4.4E-1  | 1.0E0     |
|                          | Annotation Cluster 15 | Enrichment Score: 1.21                                                        | <b>G</b>           |  |  |  | Count | P_Value | Benjamini |
| <input type="checkbox"/> | GOTERM_BP_ALL         | <a href="#">nucleocytoplasmic transport</a>                                   | <a href="#">RT</a> |  |  |  | 7     | 3.5E-3  | 4.9E-1    |
| <input type="checkbox"/> | GOTERM_BP_ALL         | <a href="#">nuclear transport</a>                                             | <a href="#">RT</a> |  |  |  | 7     | 3.6E-3  | 4.8E-1    |
| <input type="checkbox"/> | GOTERM_CC_ALL         | <a href="#">organelle envelope</a>                                            | <a href="#">RT</a> |  |  |  | 11    | 2.1E-2  | 4.1E-1    |
| <input type="checkbox"/> | GOTERM_CC_ALL         | <a href="#">nuclear pore</a>                                                  | <a href="#">RT</a> |  |  |  | 4     | 2.3E-2  | 4.4E-1    |
| <input type="checkbox"/> | GOTERM_CC_ALL         | <a href="#">pore complex</a>                                                  | <a href="#">RT</a> |  |  |  | 4     | 3.0E-2  | 5.1E-1    |
| <input type="checkbox"/> | GOTERM_CC_ALL         | <a href="#">nuclear membrane part</a>                                         | <a href="#">RT</a> |  |  |  | 4     | 3.8E-2  | 5.9E-1    |
| <input type="checkbox"/> | GOTERM_CC_ALL         | <a href="#">nuclear membrane</a>                                              | <a href="#">RT</a> |  |  |  | 4     | 4.3E-2  | 6.2E-1    |
| <input type="checkbox"/> | SP_PIR_KEYWORDS       | <a href="#">protein transport</a>                                             | <a href="#">RT</a> |  |  |  | 10    | 6.0E-2  | 8.9E-1    |
| <input type="checkbox"/> | GOTERM_BP_ALL         | <a href="#">protein transport</a>                                             | <a href="#">RT</a> |  |  |  | 13    | 1.5E-1  | 1.0E0     |
| <input type="checkbox"/> | GOTERM_CC_ALL         | <a href="#">nuclear envelope</a>                                              | <a href="#">RT</a> |  |  |  | 4     | 1.7E-1  | 9.5E-1    |
| <input type="checkbox"/> | GOTERM_CC_ALL         | <a href="#">organelle membrane</a>                                            | <a href="#">RT</a> |  |  |  | 11    | 1.8E-1  | 9.6E-1    |
| <input type="checkbox"/> | GOTERM_BP_ALL         | <a href="#">establishment of protein localization</a>                         | <a href="#">RT</a> |  |  |  | 13    | 2.0E-1  | 1.0E0     |
| <input type="checkbox"/> | GOTERM_BP_ALL         | <a href="#">protein localization</a>                                          | <a href="#">RT</a> |  |  |  | 13    | 2.8E-1  | 1.0E0     |
| <input type="checkbox"/> | GOTERM_BP_ALL         | <a href="#">intracellular protein transport</a>                               | <a href="#">RT</a> |  |  |  | 8     | 3.0E-1  | 1.0E0     |
| <input type="checkbox"/> | GOTERM_CC_ALL         | <a href="#">endomembrane system</a>                                           | <a href="#">RT</a> |  |  |  | 5     | 6.5E-1  | 1.0E0     |

| Annotation Cluster 16    |                 | Enrichment Score: 1.06                                                                                       | G                  |    | Count | P_Value | Benjamini |
|--------------------------|-----------------|--------------------------------------------------------------------------------------------------------------|--------------------|---------------------------------------------------------------------------------------|-------|---------|-----------|
| <input type="checkbox"/> | UP_SEQ_FEATURE  | repeat:WD 6                                                                                                  | <a href="#">RT</a> |      | 5     | 2.5E-2  | 1.0E0     |
| <input type="checkbox"/> | SMART           | <a href="#">WD40</a>                                                                                         | <a href="#">RT</a> |      | 6     | 3.7E-2  | 1.0E0     |
| <input type="checkbox"/> | UP_SEQ_FEATURE  | repeat:WD 5                                                                                                  | <a href="#">RT</a> |      | 5     | 5.7E-2  | 1.0E0     |
| <input type="checkbox"/> | UP_SEQ_FEATURE  | repeat:WD 4                                                                                                  | <a href="#">RT</a> |      | 5     | 7.0E-2  | 1.0E0     |
| <input type="checkbox"/> | UP_SEQ_FEATURE  | repeat:WD 3                                                                                                  | <a href="#">RT</a> |      | 5     | 8.2E-2  | 1.0E0     |
| <input type="checkbox"/> | UP_SEQ_FEATURE  | repeat:WD 1                                                                                                  | <a href="#">RT</a> |      | 5     | 8.6E-2  | 1.0E0     |
| <input type="checkbox"/> | UP_SEQ_FEATURE  | repeat:WD 2                                                                                                  | <a href="#">RT</a> |      | 5     | 8.6E-2  | 1.0E0     |
| <input type="checkbox"/> | SP_PIR_KEYWORDS | <a href="#">wd repeat</a>                                                                                    | <a href="#">RT</a> |      | 6     | 1.7E-1  | 9.9E-1    |
| <input type="checkbox"/> | UP_SEQ_FEATURE  | repeat:WD 7                                                                                                  | <a href="#">RT</a> |      | 3     | 1.8E-1  | 1.0E0     |
| <input type="checkbox"/> | INTERPRO        | <a href="#">WD40 repeat</a>                                                                                  | <a href="#">RT</a> |      | 4     | 3.8E-1  | 1.0E0     |
| Annotation Cluster 17    |                 | Enrichment Score: 0.95                                                                                       | G                  |    | Count | P_Value | Benjamini |
| <input type="checkbox"/> | GOTERM_CC_ALL   | <a href="#">outer membrane</a>                                                                               | <a href="#">RT</a> |      | 5     | 1.3E-2  | 2.9E-1    |
| <input type="checkbox"/> | GOTERM_MF_ALL   | <a href="#">porin activity</a>                                                                               | <a href="#">RT</a> |      | 3     | 3.8E-2  | 1.0E0     |
| <input type="checkbox"/> | SP_PIR_KEYWORDS | <a href="#">porin</a>                                                                                        | <a href="#">RT</a> |      | 3     | 5.0E-2  | 8.6E-1    |
| <input type="checkbox"/> | GOTERM_MF_ALL   | <a href="#">wide pore channel activity</a>                                                                   | <a href="#">RT</a> |      | 3     | 9.1E-2  | 1.0E0     |
| <input type="checkbox"/> | GOTERM_MF_ALL   | <a href="#">channel activity</a>                                                                             | <a href="#">RT</a> |      | 3     | 9.3E-1  | 1.0E0     |
| <input type="checkbox"/> | GOTERM_MF_ALL   | <a href="#">passive transmembrane transporter activity</a>                                                   | <a href="#">RT</a> |      | 3     | 9.3E-1  | 1.0E0     |
| Annotation Cluster 18    |                 | Enrichment Score: 0.92                                                                                       | G                  |    | Count | P_Value | Benjamini |
| <input type="checkbox"/> | SP_PIR_KEYWORDS | <a href="#">decarboxylase</a>                                                                                | <a href="#">RT</a> |      | 3     | 3.6E-2  | 7.8E-1    |
| <input type="checkbox"/> | GOTERM_MF_ALL   | <a href="#">carboxy-lyase activity</a>                                                                       | <a href="#">RT</a> |      | 3     | 5.5E-2  | 1.0E0     |
| <input type="checkbox"/> | GOTERM_MF_ALL   | <a href="#">carbon-carbon lyase activity</a>                                                                 | <a href="#">RT</a> |      | 3     | 9.8E-2  | 1.0E0     |
| <input type="checkbox"/> | GOTERM_MF_ALL   | <a href="#">lyase activity</a>                                                                               | <a href="#">RT</a> |      | 4     | 3.1E-1  | 1.0E0     |
| <input type="checkbox"/> | SP_PIR_KEYWORDS | <a href="#">lyase</a>                                                                                        | <a href="#">RT</a> |      | 3     | 4.3E-1  | 1.0E0     |
| Annotation Cluster 19    |                 | Enrichment Score: 0.83                                                                                       | G                  |   | Count | P_Value | Benjamini |
| <input type="checkbox"/> | GOTERM_BP_ALL   | <a href="#">negative regulation of nucleobase, nucleoside, nucleotide and nucleic acid metabolic process</a> | <a href="#">RT</a> |    | 10    | 1.4E-2  | 7.8E-1    |
| <input type="checkbox"/> | GOTERM_BP_ALL   | <a href="#">negative regulation of cellular metabolic process</a>                                            | <a href="#">RT</a> |    | 10    | 3.3E-2  | 9.6E-1    |
| <input type="checkbox"/> | GOTERM_BP_ALL   | <a href="#">negative regulation of metabolic process</a>                                                     | <a href="#">RT</a> |    | 10    | 6.4E-2  | 1.0E0     |
| <input type="checkbox"/> | GOTERM_BP_ALL   | <a href="#">negative regulation of transcription</a>                                                         | <a href="#">RT</a> |    | 7     | 1.5E-1  | 1.0E0     |
| <input type="checkbox"/> | GOTERM_BP_ALL   | <a href="#">negative regulation of cellular process</a>                                                      | <a href="#">RT</a> |    | 17    | 1.5E-1  | 1.0E0     |
| <input type="checkbox"/> | GOTERM_BP_ALL   | <a href="#">negative regulation of biological process</a>                                                    | <a href="#">RT</a> |    | 17    | 2.2E-1  | 1.0E0     |
| <input type="checkbox"/> | GOTERM_BP_ALL   | <a href="#">negative regulation of transcription from RNA polymerase II promoter</a>                         | <a href="#">RT</a> |    | 4     | 2.9E-1  | 1.0E0     |
| <input type="checkbox"/> | GOTERM_BP_ALL   | <a href="#">regulation of transcription from RNA polymerase II promoter</a>                                  | <a href="#">RT</a> |    | 7     | 4.4E-1  | 1.0E0     |
| <input type="checkbox"/> | GOTERM_BP_ALL   | <a href="#">negative regulation of transcription, DNA-dependent</a>                                          | <a href="#">RT</a> |    | 4     | 5.0E-1  | 1.0E0     |
| <input type="checkbox"/> | GOTERM_BP_ALL   | <a href="#">transcription from RNA polymerase II promoter</a>                                                | <a href="#">RT</a> |    | 7     | 5.4E-1  | 1.0E0     |
| Annotation Cluster 20    |                 | Enrichment Score: 0.82                                                                                       | G                  |  | Count | P_Value | Benjamini |
| <input type="checkbox"/> | GOTERM_MF_ALL   | <a href="#">ATP binding</a>                                                                                  | <a href="#">RT</a> |    | 22    | 9.0E-2  | 1.0E0     |
| <input type="checkbox"/> | GOTERM_MF_ALL   | <a href="#">adenyl ribonucleotide binding</a>                                                                | <a href="#">RT</a> |    | 22    | 9.9E-2  | 1.0E0     |
| <input type="checkbox"/> | GOTERM_MF_ALL   | <a href="#">nucleotide binding</a>                                                                           | <a href="#">RT</a> |    | 29    | 1.4E-1  | 1.0E0     |
| <input type="checkbox"/> | GOTERM_MF_ALL   | <a href="#">adenyl nucleotide binding</a>                                                                    | <a href="#">RT</a> |    | 22    | 1.4E-1  | 1.0E0     |
| <input type="checkbox"/> | GOTERM_MF_ALL   | <a href="#">purine ribonucleotide binding</a>                                                                | <a href="#">RT</a> |    | 25    | 1.4E-1  | 1.0E0     |
| <input type="checkbox"/> | GOTERM_MF_ALL   | <a href="#">ribonucleotide binding</a>                                                                       | <a href="#">RT</a> |    | 25    | 1.4E-1  | 1.0E0     |
| <input type="checkbox"/> | UP_SEQ_FEATURE  | nucleotide phosphate-binding region:ATP                                                                      | <a href="#">RT</a> |    | 12    | 1.5E-1  | 1.0E0     |
| <input type="checkbox"/> | GOTERM_MF_ALL   | <a href="#">purine nucleotide binding</a>                                                                    | <a href="#">RT</a> |    | 25    | 1.9E-1  | 1.0E0     |
| <input type="checkbox"/> | SP_PIR_KEYWORDS | <a href="#">atp-binding</a>                                                                                  | <a href="#">RT</a> |    | 17    | 2.2E-1  | 1.0E0     |
| <input type="checkbox"/> | SP_PIR_KEYWORDS | <a href="#">nucleotide-binding</a>                                                                           | <a href="#">RT</a> |    | 20    | 2.9E-1  | 1.0E0     |
| Annotation Cluster 21    |                 | Enrichment Score: 0.69                                                                                       | G                  |  | Count | P_Value | Benjamini |

| <input type="checkbox"/> |                       |                                                                                 |    |  |  |  |  |       |         |           |  |
|--------------------------|-----------------------|---------------------------------------------------------------------------------|----|--|--|--|--|-------|---------|-----------|--|
| <input type="checkbox"/> | GOTERM_MF_ALL         | <a href="#">acid phosphatase activity</a>                                       | RT |  |  |  |  | 3     | 1.3E-2  | 1.0E0     |  |
| <input type="checkbox"/> | GOTERM_MF_ALL         | <a href="#">phosphoric monoester hydrolase activity</a>                         | RT |  |  |  |  | 3     | 7.6E-1  | 1.0E0     |  |
| <input type="checkbox"/> | GOTERM_MF_ALL         | <a href="#">phosphoric ester hydrolase activity</a>                             | RT |  |  |  |  | 3     | 8.6E-1  | 1.0E0     |  |
|                          | Annotation Cluster 22 | Enrichment Score: 0.69                                                          | G  |  |  |  |  | Count | P_Value | Benjamini |  |
| <input type="checkbox"/> | UP_SEQ_FEATURE        | domain:Helicase C-terminal                                                      | RT |  |  |  |  | 3     | 1.3E-1  | 1.0E0     |  |
| <input type="checkbox"/> | UP_SEQ_FEATURE        | domain:Helicase ATP-binding                                                     | RT |  |  |  |  | 3     | 1.5E-1  | 1.0E0     |  |
| <input type="checkbox"/> | GOTERM_MF_ALL         | <a href="#">helicase activity</a>                                               | RT |  |  |  |  | 4     | 2.1E-1  | 1.0E0     |  |
| <input type="checkbox"/> | SP_PIR_KEYWORDS       | <a href="#">helicase</a>                                                        | RT |  |  |  |  | 3     | 4.1E-1  | 1.0E0     |  |
|                          | Annotation Cluster 23 | Enrichment Score: 0.68                                                          | G  |  |  |  |  | Count | P_Value | Benjamini |  |
| <input type="checkbox"/> | GOTERM_CC_ALL         | <a href="#">envelope</a>                                                        | RT |  |  |  |  | 12    | 8.4E-3  | 2.1E-1    |  |
| <input type="checkbox"/> | GOTERM_CC_ALL         | <a href="#">organelle envelope</a>                                              | RT |  |  |  |  | 11    | 2.1E-2  | 4.1E-1    |  |
| <input type="checkbox"/> | GOTERM_CC_ALL         | <a href="#">mitochondrial part</a>                                              | RT |  |  |  |  | 9     | 4.3E-2  | 6.1E-1    |  |
| <input type="checkbox"/> | SP_PIR_KEYWORDS       | <a href="#">Mitochondrion</a>                                                   | RT |  |  |  |  | 14    | 4.6E-2  | 8.5E-1    |  |
| <input type="checkbox"/> | GOTERM_CC_ALL         | <a href="#">mitochondrial envelope</a>                                          | RT |  |  |  |  | 7     | 1.2E-1  | 8.9E-1    |  |
| <input type="checkbox"/> | GOTERM_CC_ALL         | <a href="#">mitochondrial inner membrane</a>                                    | RT |  |  |  |  | 6     | 1.5E-1  | 9.4E-1    |  |
| <input type="checkbox"/> | GOTERM_CC_ALL         | <a href="#">mitochondrion</a>                                                   | RT |  |  |  |  | 15    | 1.5E-1  | 9.4E-1    |  |
| <input type="checkbox"/> | GOTERM_CC_ALL         | <a href="#">organelle inner membrane</a>                                        | RT |  |  |  |  | 6     | 1.7E-1  | 9.6E-1    |  |
| <input type="checkbox"/> | GOTERM_CC_ALL         | <a href="#">organelle membrane</a>                                              | RT |  |  |  |  | 11    | 1.8E-1  | 9.6E-1    |  |
| <input type="checkbox"/> | GOTERM_CC_ALL         | <a href="#">mitochondrial membrane</a>                                          | RT |  |  |  |  | 6     | 2.0E-1  | 9.7E-1    |  |
| <input type="checkbox"/> | GOTERM_CC_ALL         | <a href="#">cytoplasmic part</a>                                                | RT |  |  |  |  | 36    | 6.2E-1  | 1.0E0     |  |
| <input type="checkbox"/> | GOTERM_MF_ALL         | <a href="#">substrate-specific transmembrane transporter activity</a>           | RT |  |  |  |  | 7     | 8.6E-1  | 1.0E0     |  |
| <input type="checkbox"/> | GOTERM_BP_ALL         | <a href="#">metal ion transport</a>                                             | RT |  |  |  |  | 3     | 9.6E-1  | 1.0E0     |  |
| <input type="checkbox"/> | SP_PIR_KEYWORDS       | <a href="#">ion transport</a>                                                   | RT |  |  |  |  | 3     | 9.8E-1  | 1.0E0     |  |
| <input type="checkbox"/> | GOTERM_BP_ALL         | <a href="#">cation transport</a>                                                | RT |  |  |  |  | 3     | 9.9E-1  | 1.0E0     |  |
| <input type="checkbox"/> | GOTERM_MF_ALL         | <a href="#">ion transmembrane transporter activity</a>                          | RT |  |  |  |  | 3     | 1.0E0   | 1.0E0     |  |
| <input type="checkbox"/> | GOTERM_BP_ALL         | <a href="#">ion transport</a>                                                   | RT |  |  |  |  | 4     | 1.0E0   | 1.0E0     |  |
|                          | Annotation Cluster 24 | Enrichment Score: 0.61                                                          | G  |  |  |  |  | Count | P_Value | Benjamini |  |
| <input type="checkbox"/> | GOTERM_CC_ALL         | <a href="#">membrane-enclosed lumen</a>                                         | RT |  |  |  |  | 15    | 9.6E-2  | 8.6E-1    |  |
| <input type="checkbox"/> | GOTERM_CC_ALL         | <a href="#">organelle lumen</a>                                                 | RT |  |  |  |  | 15    | 9.6E-2  | 8.6E-1    |  |
| <input type="checkbox"/> | GOTERM_CC_ALL         | <a href="#">nuclear lumen</a>                                                   | RT |  |  |  |  | 12    | 2.2E-1  | 9.8E-1    |  |
| <input type="checkbox"/> | GOTERM_CC_ALL         | <a href="#">nucleoplasm</a>                                                     | RT |  |  |  |  | 10    | 2.6E-1  | 9.9E-1    |  |
| <input type="checkbox"/> | GOTERM_CC_ALL         | <a href="#">nucleoplasm part</a>                                                | RT |  |  |  |  | 8     | 4.8E-1  | 1.0E0     |  |
| <input type="checkbox"/> | GOTERM_CC_ALL         | <a href="#">transcription factor complex</a>                                    | RT |  |  |  |  | 4     | 8.8E-1  | 1.0E0     |  |
|                          | Annotation Cluster 25 | Enrichment Score: 0.6                                                           | G  |  |  |  |  | Count | P_Value | Benjamini |  |
| <input type="checkbox"/> | GOTERM_BP_ALL         | <a href="#">protein folding</a>                                                 | RT |  |  |  |  | 6     | 1.2E-1  | 1.0E0     |  |
| <input type="checkbox"/> | GOTERM_MF_ALL         | <a href="#">isomerase activity</a>                                              | RT |  |  |  |  | 4     | 2.8E-1  | 1.0E0     |  |
| <input type="checkbox"/> | SP_PIR_KEYWORDS       | <a href="#">isomerase</a>                                                       | RT |  |  |  |  | 3     | 4.5E-1  | 1.0E0     |  |
|                          | Annotation Cluster 26 | Enrichment Score: 0.6                                                           | G  |  |  |  |  | Count | P_Value | Benjamini |  |
| <input type="checkbox"/> | GOTERM_BP_ALL         | <a href="#">protein ubiquitination</a>                                          | RT |  |  |  |  | 5     | 5.7E-3  | 5.8E-1    |  |
| <input type="checkbox"/> | GOTERM_BP_ALL         | <a href="#">protein modification by small protein conjugation</a>               | RT |  |  |  |  | 5     | 8.6E-3  | 6.7E-1    |  |
| <input type="checkbox"/> | GOTERM_BP_ALL         | <a href="#">ubiquitin cycle</a>                                                 | RT |  |  |  |  | 10    | 1.5E-1  | 1.0E0     |  |
| <input type="checkbox"/> | GOTERM_BP_ALL         | <a href="#">biopolymer modification</a>                                         | RT |  |  |  |  | 19    | 7.6E-1  | 1.0E0     |  |
| <input type="checkbox"/> | GOTERM_BP_ALL         | <a href="#">protein modification process</a>                                    | RT |  |  |  |  | 16    | 9.0E-1  | 1.0E0     |  |
| <input type="checkbox"/> | GOTERM_BP_ALL         | <a href="#">cellular protein metabolic process</a>                              | RT |  |  |  |  | 30    | 9.4E-1  | 1.0E0     |  |
| <input type="checkbox"/> | GOTERM_BP_ALL         | <a href="#">cellular macromolecule metabolic process</a>                        | RT |  |  |  |  | 30    | 9.5E-1  | 1.0E0     |  |
| <input type="checkbox"/> | GOTERM_BP_ALL         | <a href="#">protein metabolic process</a>                                       | RT |  |  |  |  | 31    | 9.5E-1  | 1.0E0     |  |
| <input type="checkbox"/> | GOTERM_BP_ALL         | <a href="#">post-translational protein modification</a>                         | RT |  |  |  |  | 12    | 9.6E-1  | 1.0E0     |  |
|                          | Annotation Cluster 27 | Enrichment Score: 0.58                                                          | G  |  |  |  |  | Count | P_Value | Benjamini |  |
| <input type="checkbox"/> | GOTERM_MF_ALL         | <a href="#">transferase activity, transferring phosphorus-containing groups</a> | RT |  |  |  |  | 18    | 7.6E-2  | 1.0E0     |  |

| <input type="checkbox"/> |                       |                                                                |    |  |  |  |       |         |           |
|--------------------------|-----------------------|----------------------------------------------------------------|----|--|--|--|-------|---------|-----------|
| <input type="checkbox"/> | GOTERM_MF_ALL         | <a href="#">transferase activity</a>                           | RT |  |  |  | 28    | 8.5E-2  | 1.0E0     |
| <input type="checkbox"/> | GOTERM_MF_ALL         | <a href="#">kinase activity</a>                                | RT |  |  |  | 12    | 4.4E-1  | 1.0E0     |
| <input type="checkbox"/> | SP_PIR_KEYWORDS       | <a href="#">transferase</a>                                    | RT |  |  |  | 17    | 5.6E-1  | 1.0E0     |
| <input type="checkbox"/> | SP_PIR_KEYWORDS       | <a href="#">kinase</a>                                         | RT |  |  |  | 8     | 7.9E-1  | 1.0E0     |
|                          | Annotation Cluster 28 | Enrichment Score: 0.55                                         | G  |  |  |  | Count | P_Value | Benjamini |
| <input type="checkbox"/> | SP_PIR_KEYWORDS       | <a href="#">protein transport</a>                              | RT |  |  |  | 10    | 6.0E-2  | 8.9E-1    |
| <input type="checkbox"/> | GOTERM_BP_ALL         | <a href="#">intracellular transport</a>                        | RT |  |  |  | 14    | 8.3E-2  | 1.0E0     |
| <input type="checkbox"/> | GOTERM_BP_ALL         | <a href="#">macromolecule localization</a>                     | RT |  |  |  | 16    | 8.6E-2  | 1.0E0     |
| <input type="checkbox"/> | GOTERM_BP_ALL         | <a href="#">protein transport</a>                              | RT |  |  |  | 13    | 1.5E-1  | 1.0E0     |
| <input type="checkbox"/> | GOTERM_BP_ALL         | <a href="#">establishment of protein localization</a>          | RT |  |  |  | 13    | 2.0E-1  | 1.0E0     |
| <input type="checkbox"/> | SP_PIR_KEYWORDS       | <a href="#">transport</a>                                      | RT |  |  |  | 20    | 2.4E-1  | 1.0E0     |
| <input type="checkbox"/> | GOTERM_BP_ALL         | <a href="#">establishment of cellular localization</a>         | RT |  |  |  | 14    | 2.6E-1  | 1.0E0     |
| <input type="checkbox"/> | GOTERM_BP_ALL         | <a href="#">protein import</a>                                 | RT |  |  |  | 3     | 2.7E-1  | 1.0E0     |
| <input type="checkbox"/> | GOTERM_BP_ALL         | <a href="#">protein localization</a>                           | RT |  |  |  | 13    | 2.8E-1  | 1.0E0     |
| <input type="checkbox"/> | GOTERM_BP_ALL         | <a href="#">cellular localization</a>                          | RT |  |  |  | 14    | 2.9E-1  | 1.0E0     |
| <input type="checkbox"/> | GOTERM_BP_ALL         | <a href="#">intracellular protein transport</a>                | RT |  |  |  | 8     | 3.0E-1  | 1.0E0     |
| <input type="checkbox"/> | GOTERM_BP_ALL         | <a href="#">protein targeting</a>                              | RT |  |  |  | 5     | 3.5E-1  | 1.0E0     |
| <input type="checkbox"/> | GOTERM_MF_ALL         | <a href="#">protein transporter activity</a>                   | RT |  |  |  | 3     | 5.4E-1  | 1.0E0     |
| <input type="checkbox"/> | GOTERM_BP_ALL         | <a href="#">protein complex assembly</a>                       | RT |  |  |  | 3     | 6.3E-1  | 1.0E0     |
| <input type="checkbox"/> | GOTERM_CC_ALL         | <a href="#">endomembrane system</a>                            | RT |  |  |  | 5     | 6.5E-1  | 1.0E0     |
| <input type="checkbox"/> | GOTERM_BP_ALL         | <a href="#">transport</a>                                      | RT |  |  |  | 30    | 6.8E-1  | 1.0E0     |
| <input type="checkbox"/> | GOTERM_BP_ALL         | <a href="#">establishment of localization</a>                  | RT |  |  |  | 30    | 7.4E-1  | 1.0E0     |
| <input type="checkbox"/> | GOTERM_BP_ALL         | <a href="#">localization</a>                                   | RT |  |  |  | 34    | 7.5E-1  | 1.0E0     |
|                          | Annotation Cluster 29 | Enrichment Score: 0.52                                         | G  |  |  |  | Count | P_Value | Benjamini |
| <input type="checkbox"/> | INTERPRO              | <a href="#">Thioredoxin domain</a>                             | RT |  |  |  | 3     | 2.6E-2  | 1.0E0     |
| <input type="checkbox"/> | INTERPRO              | <a href="#">Thioredoxin-related</a>                            | RT |  |  |  | 3     | 3.7E-2  | 1.0E0     |
| <input type="checkbox"/> | GOTERM_BP_ALL         | <a href="#">cell redox homeostasis</a>                         | RT |  |  |  | 3     | 1.4E-1  | 1.0E0     |
| <input type="checkbox"/> | INTERPRO              | <a href="#">Thioredoxin fold</a>                               | RT |  |  |  | 3     | 2.1E-1  | 1.0E0     |
| <input type="checkbox"/> | GOTERM_BP_ALL         | <a href="#">homeostatic process</a>                            | RT |  |  |  | 7     | 3.1E-1  | 1.0E0     |
| <input type="checkbox"/> | GOTERM_MF_ALL         | <a href="#">electron carrier activity</a>                      | RT |  |  |  | 4     | 3.8E-1  | 1.0E0     |
| <input type="checkbox"/> | GOTERM_BP_ALL         | <a href="#">regulation of biological quality</a>               | RT |  |  |  | 8     | 7.9E-1  | 1.0E0     |
| <input type="checkbox"/> | GOTERM_BP_ALL         | <a href="#">cellular homeostasis</a>                           | RT |  |  |  | 3     | 8.3E-1  | 1.0E0     |
| <input type="checkbox"/> | GOTERM_BP_ALL         | <a href="#">generation of precursor metabolites and energy</a> | RT |  |  |  | 4     | 9.6E-1  | 1.0E0     |
| <input type="checkbox"/> | GOTERM_BP_ALL         | <a href="#">electron transport</a>                             | RT |  |  |  | 3     | 9.6E-1  | 1.0E0     |
| <input type="checkbox"/> | GOTERM_MF_ALL         | <a href="#">oxidoreductase activity</a>                        | RT |  |  |  | 4     | 1.0E0   | 1.0E0     |
|                          | Annotation Cluster 30 | Enrichment Score: 0.49                                         | G  |  |  |  | Count | P_Value | Benjamini |
| <input type="checkbox"/> | GOTERM_BP_ALL         | <a href="#">lung development</a>                               | RT |  |  |  | 3     | 2.2E-1  | 1.0E0     |
| <input type="checkbox"/> | GOTERM_BP_ALL         | <a href="#">respiratory tube development</a>                   | RT |  |  |  | 3     | 2.2E-1  | 1.0E0     |
| <input type="checkbox"/> | GOTERM_BP_ALL         | <a href="#">tube development</a>                               | RT |  |  |  | 3     | 7.3E-1  | 1.0E0     |
|                          | Annotation Cluster 31 | Enrichment Score: 0.46                                         | G  |  |  |  | Count | P_Value | Benjamini |
| <input type="checkbox"/> | SP_PIR_KEYWORDS       | <a href="#">ribonucleoprotein</a>                              | RT |  |  |  | 6     | 1.9E-1  | 1.0E0     |
| <input type="checkbox"/> | SP_PIR_KEYWORDS       | <a href="#">ribosomal protein</a>                              | RT |  |  |  | 4     | 3.6E-1  | 1.0E0     |
| <input type="checkbox"/> | GOTERM_CC_ALL         | <a href="#">ribosome</a>                                       | RT |  |  |  | 3     | 6.0E-1  | 1.0E0     |
|                          | Annotation Cluster 32 | Enrichment Score: 0.45                                         | G  |  |  |  | Count | P_Value | Benjamini |
| <input type="checkbox"/> | GOTERM_MF_ALL         | <a href="#">ligase activity, forming carbon-nitrogen bonds</a> | RT |  |  |  | 5     | 1.6E-1  | 1.0E0     |
| <input type="checkbox"/> | GOTERM_MF_ALL         | <a href="#">ligase activity</a>                                | RT |  |  |  | 7     | 2.2E-1  | 1.0E0     |
| <input type="checkbox"/> | SP_PIR_KEYWORDS       | <a href="#">ligase</a>                                         | RT |  |  |  | 5     | 3.7E-1  | 1.0E0     |
| <input type="checkbox"/> | GOTERM_MF_ALL         | <a href="#">ubiquitin-protein ligase activity</a>              | RT |  |  |  | 3     | 4.2E-1  | 1.0E0     |
| <input type="checkbox"/> | GOTERM_MF_ALL         | <a href="#">small protein conjugating enzyme activity</a>      | RT |  |  |  | 3     | 4.3E-1  | 1.0E0     |

|                          |                 |                                                                                  |                        |   |    |        |         |           |
|--------------------------|-----------------|----------------------------------------------------------------------------------|------------------------|---|----|--------|---------|-----------|
| <input type="checkbox"/> | GOTERM_MF_ALL   | <a href="#">small conjugating protein ligase activity</a>                        | RT                     |   | 3  | 4.4E-1 | 1.0E0   |           |
| <input type="checkbox"/> | GOTERM_MF_ALL   | <a href="#">acid-amino acid ligase activity</a>                                  | RT                     |   | 3  | 5.0E-1 | 1.0E0   |           |
| <input type="checkbox"/> | SP_PIR_KEYWORDS | <a href="#">Ubl conjugation pathway</a>                                          | RT                     |   | 6  | 5.2E-1 | 1.0E0   |           |
|                          |                 | Annotation Cluster 33                                                            | Enrichment Score: 0.43 | G |    | Count  | P_Value | Benjamini |
| <input type="checkbox"/> | GOTERM_BP_ALL   | <a href="#">chromosome organization and biogenesis</a>                           | RT                     |   | 7  | 2.1E-1 | 1.0E0   |           |
| <input type="checkbox"/> | GOTERM_BP_ALL   | <a href="#">establishment and/or maintenance of chromatin architecture</a>       | RT                     |   | 5  | 3.7E-1 | 1.0E0   |           |
| <input type="checkbox"/> | SP_PIR_KEYWORDS | <a href="#">Chromatin regulator</a>                                              | RT                     |   | 3  | 3.7E-1 | 1.0E0   |           |
| <input type="checkbox"/> | GOTERM_BP_ALL   | <a href="#">DNA packaging</a>                                                    | RT                     |   | 5  | 3.9E-1 | 1.0E0   |           |
| <input type="checkbox"/> | GOTERM_BP_ALL   | <a href="#">chromatin modification</a>                                           | RT                     |   | 3  | 6.6E-1 | 1.0E0   |           |
|                          |                 | Annotation Cluster 34                                                            | Enrichment Score: 0.41 | G |    | Count  | P_Value | Benjamini |
| <input type="checkbox"/> | SP_PIR_KEYWORDS | <a href="#">apoptosis</a>                                                        | RT                     |   | 7  | 1.1E-1 | 9.8E-1  |           |
| <input type="checkbox"/> | GOTERM_BP_ALL   | <a href="#">apoptosis</a>                                                        | RT                     |   | 13 | 1.5E-1 | 1.0E0   |           |
| <input type="checkbox"/> | GOTERM_BP_ALL   | <a href="#">programmed cell death</a>                                            | RT                     |   | 13 | 1.6E-1 | 1.0E0   |           |
| <input type="checkbox"/> | GOTERM_BP_ALL   | <a href="#">positive regulation of cellular process</a>                          | RT                     |   | 16 | 1.7E-1 | 1.0E0   |           |
| <input type="checkbox"/> | GOTERM_BP_ALL   | <a href="#">death</a>                                                            | RT                     |   | 13 | 1.9E-1 | 1.0E0   |           |
| <input type="checkbox"/> | GOTERM_BP_ALL   | <a href="#">cell death</a>                                                       | RT                     |   | 13 | 1.9E-1 | 1.0E0   |           |
| <input type="checkbox"/> | GOTERM_BP_ALL   | <a href="#">regulation of apoptosis</a>                                          | RT                     |   | 9  | 2.2E-1 | 1.0E0   |           |
| <input type="checkbox"/> | GOTERM_BP_ALL   | <a href="#">positive regulation of biological process</a>                        | RT                     |   | 17 | 2.2E-1 | 1.0E0   |           |
| <input type="checkbox"/> | GOTERM_BP_ALL   | <a href="#">negative regulation of apoptosis</a>                                 | RT                     |   | 5  | 2.3E-1 | 1.0E0   |           |
| <input type="checkbox"/> | GOTERM_BP_ALL   | <a href="#">regulation of programmed cell death</a>                              | RT                     |   | 9  | 2.3E-1 | 1.0E0   |           |
| <input type="checkbox"/> | GOTERM_BP_ALL   | <a href="#">negative regulation of programmed cell death</a>                     | RT                     |   | 5  | 2.4E-1 | 1.0E0   |           |
| <input type="checkbox"/> | GOTERM_BP_ALL   | <a href="#">cell development</a>                                                 | RT                     |   | 15 | 6.8E-1 | 1.0E0   |           |
| <input type="checkbox"/> | GOTERM_BP_ALL   | <a href="#">cell differentiation</a>                                             | RT                     |   | 19 | 8.9E-1 | 1.0E0   |           |
| <input type="checkbox"/> | GOTERM_BP_ALL   | <a href="#">cellular developmental process</a>                                   | RT                     |   | 19 | 8.9E-1 | 1.0E0   |           |
| <input type="checkbox"/> | GOTERM_BP_ALL   | <a href="#">developmental process</a>                                            | RT                     |   | 28 | 9.8E-1 | 1.0E0   |           |
| <input type="checkbox"/> | GOTERM_BP_ALL   | <a href="#">system development</a>                                               | RT                     |   | 14 | 9.9E-1 | 1.0E0   |           |
| <input type="checkbox"/> | GOTERM_BP_ALL   | <a href="#">anatomical structure development</a>                                 | RT                     |   | 17 | 9.9E-1 | 1.0E0   |           |
| <input type="checkbox"/> | GOTERM_BP_ALL   | <a href="#">multicellular organismal development</a>                             | RT                     |   | 19 | 9.9E-1 | 1.0E0   |           |
| <input type="checkbox"/> | GOTERM_BP_ALL   | <a href="#">organ development</a>                                                | RT                     |   | 9  | 1.0E0  | 1.0E0   |           |
| <input type="checkbox"/> | GOTERM_BP_ALL   | <a href="#">multicellular organismal process</a>                                 | RT                     |   | 20 | 1.0E0  | 1.0E0   |           |
|                          |                 | Annotation Cluster 35                                                            | Enrichment Score: 0.41 | G |    | Count  | P_Value | Benjamini |
| <input type="checkbox"/> | KEGG_PATHWAY    | <a href="#">mTOR signaling pathway</a>                                           | RT                     |   | 3  | 8.1E-2 | 9.9E-1  |           |
| <input type="checkbox"/> | KEGG_PATHWAY    | <a href="#">Renal cell carcinoma</a>                                             | RT                     |   | 3  | 1.4E-1 | 9.9E-1  |           |
| <input type="checkbox"/> | KEGG_PATHWAY    | <a href="#">Pancreatic cancer</a>                                                | RT                     |   | 3  | 1.4E-1 | 9.9E-1  |           |
| <input type="checkbox"/> | KEGG_PATHWAY    | <a href="#">VEGF signaling pathway</a>                                           | RT                     |   | 3  | 1.5E-1 | 9.9E-1  |           |
| <input type="checkbox"/> | GOTERM_BP_ALL   | <a href="#">transmembrane receptor protein tyrosine kinase signaling pathway</a> | RT                     |   | 5  | 2.2E-1 | 1.0E0   |           |
| <input type="checkbox"/> | GOTERM_BP_ALL   | <a href="#">negative regulation of apoptosis</a>                                 | RT                     |   | 5  | 2.3E-1 | 1.0E0   |           |
| <input type="checkbox"/> | GOTERM_BP_ALL   | <a href="#">negative regulation of programmed cell death</a>                     | RT                     |   | 5  | 2.4E-1 | 1.0E0   |           |
| <input type="checkbox"/> | GOTERM_BP_ALL   | <a href="#">homeostatic process</a>                                              | RT                     |   | 7  | 3.1E-1 | 1.0E0   |           |
| <input type="checkbox"/> | GOTERM_BP_ALL   | <a href="#">enzyme linked receptor protein signaling pathway</a>                 | RT                     |   | 6  | 3.3E-1 | 1.0E0   |           |
| <input type="checkbox"/> | GOTERM_BP_ALL   | <a href="#">developmental maturation</a>                                         | RT                     |   | 3  | 3.8E-1 | 1.0E0   |           |
| <input type="checkbox"/> | GOTERM_BP_ALL   | <a href="#">anti-apoptosis</a>                                                   | RT                     |   | 3  | 3.8E-1 | 1.0E0   |           |
| <input type="checkbox"/> | KEGG_PATHWAY    | <a href="#">Focal adhesion</a>                                                   | RT                     |   | 3  | 5.3E-1 | 1.0E0   |           |
| <input type="checkbox"/> | GOTERM_BP_ALL   | <a href="#">blood vessel development</a>                                         | RT                     |   | 4  | 5.7E-1 | 1.0E0   |           |
| <input type="checkbox"/> | GOTERM_BP_ALL   | <a href="#">vasculature development</a>                                          | RT                     |   | 4  | 5.8E-1 | 1.0E0   |           |
| <input type="checkbox"/> | GOTERM_BP_ALL   | <a href="#">reproduction</a>                                                     | RT                     |   | 6  | 6.8E-1 | 1.0E0   |           |
| <input type="checkbox"/> | GOTERM_BP_ALL   | <a href="#">cell morphogenesis</a>                                               | RT                     |   | 6  | 7.9E-1 | 1.0E0   |           |
| <input type="checkbox"/> | GOTERM_BP_ALL   | <a href="#">cellular structure morphogenesis</a>                                 | RT                     |   | 6  | 7.9E-1 | 1.0E0   |           |

|                          |                 |                                                                            |                    |  |       |         |           |
|--------------------------|-----------------|----------------------------------------------------------------------------|--------------------|--|-------|---------|-----------|
| <input type="checkbox"/> | GOTERM_BP_ALL   | <a href="#">regulation of biological quality</a>                           | <a href="#">RT</a> |  | 8     | 7.9E-1  | 1.0E0     |
| <input type="checkbox"/> | GOTERM_BP_ALL   | <a href="#">tissue development</a>                                         | <a href="#">RT</a> |  | 3     | 9.0E-1  | 1.0E0     |
| <input type="checkbox"/> | GOTERM_BP_ALL   | <a href="#">organ morphogenesis</a>                                        | <a href="#">RT</a> |  | 4     | 9.7E-1  | 1.0E0     |
| <input type="checkbox"/> | GOTERM_BP_ALL   | <a href="#">anatomical structure morphogenesis</a>                         | <a href="#">RT</a> |  | 7     | 1.0E0   | 1.0E0     |
| Annotation Cluster 36    |                 | Enrichment Score: 0.39                                                     | <b>G</b>           |  | Count | P_Value | Benjamini |
| <input type="checkbox"/> | GOTERM_BP_ALL   | <a href="#">regulation of apoptosis</a>                                    | <a href="#">RT</a> |  | 9     | 2.2E-1  | 1.0E0     |
| <input type="checkbox"/> | GOTERM_BP_ALL   | <a href="#">regulation of programmed cell death</a>                        | <a href="#">RT</a> |  | 9     | 2.3E-1  | 1.0E0     |
| <input type="checkbox"/> | GOTERM_BP_ALL   | <a href="#">positive regulation of apoptosis</a>                           | <a href="#">RT</a> |  | 4     | 4.9E-1  | 1.0E0     |
| <input type="checkbox"/> | GOTERM_BP_ALL   | <a href="#">positive regulation of programmed cell death</a>               | <a href="#">RT</a> |  | 4     | 5.0E-1  | 1.0E0     |
| <input type="checkbox"/> | GOTERM_BP_ALL   | <a href="#">induction of programmed cell death</a>                         | <a href="#">RT</a> |  | 3     | 6.1E-1  | 1.0E0     |
| <input type="checkbox"/> | GOTERM_BP_ALL   | <a href="#">induction of apoptosis</a>                                     | <a href="#">RT</a> |  | 3     | 6.1E-1  | 1.0E0     |
| Annotation Cluster 37    |                 | Enrichment Score: 0.34                                                     | <b>G</b>           |  | Count | P_Value | Benjamini |
| <input type="checkbox"/> | INTERPRO        | <a href="#">Zinc finger, C2H2-type</a>                                     | <a href="#">RT</a> |  | 7     | 4.2E-1  | 1.0E0     |
| <input type="checkbox"/> | UP_SEQ_FEATURE  | zinc finger region:C2H2-type 3                                             | <a href="#">RT</a> |  | 3     | 4.7E-1  | 1.0E0     |
| <input type="checkbox"/> | UP_SEQ_FEATURE  | zinc finger region:C2H2-type 1                                             | <a href="#">RT</a> |  | 3     | 5.0E-1  | 1.0E0     |
| Annotation Cluster 38    |                 | Enrichment Score: 0.32                                                     | <b>G</b>           |  | Count | P_Value | Benjamini |
| <input type="checkbox"/> | SP_PIR_KEYWORDS | <a href="#">heparin-binding</a>                                            | <a href="#">RT</a> |  | 3     | 1.5E-1  | 9.9E-1    |
| <input type="checkbox"/> | GOTERM_MF_ALL   | <a href="#">heparin binding</a>                                            | <a href="#">RT</a> |  | 3     | 1.9E-1  | 1.0E0     |
| <input type="checkbox"/> | GOTERM_MF_ALL   | <a href="#">carbohydrate binding</a>                                       | <a href="#">RT</a> |  | 6     | 2.6E-1  | 1.0E0     |
| <input type="checkbox"/> | GOTERM_MF_ALL   | <a href="#">glycosaminoglycan binding</a>                                  | <a href="#">RT</a> |  | 3     | 2.8E-1  | 1.0E0     |
| <input type="checkbox"/> | GOTERM_MF_ALL   | <a href="#">polysaccharide binding</a>                                     | <a href="#">RT</a> |  | 3     | 3.1E-1  | 1.0E0     |
| <input type="checkbox"/> | GOTERM_MF_ALL   | <a href="#">pattern binding</a>                                            | <a href="#">RT</a> |  | 3     | 3.4E-1  | 1.0E0     |
| <input type="checkbox"/> | SP_PIR_KEYWORDS | <a href="#">growth factor</a>                                              | <a href="#">RT</a> |  | 3     | 4.8E-1  | 1.0E0     |
| <input type="checkbox"/> | GOTERM_MF_ALL   | <a href="#">growth factor activity</a>                                     | <a href="#">RT</a> |  | 3     | 5.8E-1  | 1.0E0     |
| <input type="checkbox"/> | GOTERM_MF_ALL   | <a href="#">receptor binding</a>                                           | <a href="#">RT</a> |  | 8     | 6.2E-1  | 1.0E0     |
| <input type="checkbox"/> | GOTERM_CC_ALL   | <a href="#">extracellular space</a>                                        | <a href="#">RT</a> |  | 8     | 1.0E0   | 1.0E0     |
| <input type="checkbox"/> | GOTERM_CC_ALL   | <a href="#">extracellular region part</a>                                  | <a href="#">RT</a> |  | 8     | 1.0E0   | 1.0E0     |
| <input type="checkbox"/> | GOTERM_CC_ALL   | <a href="#">extracellular region</a>                                       | <a href="#">RT</a> |  | 8     | 1.0E0   | 1.0E0     |
| <input type="checkbox"/> | UP_SEQ_FEATURE  | signal peptide                                                             | <a href="#">RT</a> |  | 3     | 1.0E0   | 1.0E0     |
| <input type="checkbox"/> | SP_PIR_KEYWORDS | <a href="#">signal</a>                                                     | <a href="#">RT</a> |  | 4     | 1.0E0   | 1.0E0     |
| Annotation Cluster 39    |                 | Enrichment Score: 0.25                                                     | <b>G</b>           |  | Count | P_Value | Benjamini |
| <input type="checkbox"/> | GOTERM_BP_ALL   | <a href="#">amino acid derivative metabolic process</a>                    | <a href="#">RT</a> |  | 3     | 3.2E-1  | 1.0E0     |
| <input type="checkbox"/> | GOTERM_BP_ALL   | <a href="#">amino acid and derivative metabolic process</a>                | <a href="#">RT</a> |  | 5     | 5.9E-1  | 1.0E0     |
| <input type="checkbox"/> | GOTERM_BP_ALL   | <a href="#">amine metabolic process</a>                                    | <a href="#">RT</a> |  | 5     | 7.1E-1  | 1.0E0     |
| <input type="checkbox"/> | GOTERM_BP_ALL   | <a href="#">nitrogen compound metabolic process</a>                        | <a href="#">RT</a> |  | 5     | 7.7E-1  | 1.0E0     |
| Annotation Cluster 40    |                 | Enrichment Score: 0.23                                                     | <b>G</b>           |  | Count | P_Value | Benjamini |
| <input type="checkbox"/> | GOTERM_MF_ALL   | <a href="#">cysteine-type peptidase activity</a>                           | <a href="#">RT</a> |  | 4     | 2.9E-1  | 1.0E0     |
| <input type="checkbox"/> | SP_PIR_KEYWORDS | <a href="#">thiol protease</a>                                             | <a href="#">RT</a> |  | 3     | 3.9E-1  | 1.0E0     |
| <input type="checkbox"/> | GOTERM_BP_ALL   | <a href="#">macromolecule catabolic process</a>                            | <a href="#">RT</a> |  | 6     | 4.2E-1  | 1.0E0     |
| <input type="checkbox"/> | GOTERM_BP_ALL   | <a href="#">cellular macromolecule catabolic process</a>                   | <a href="#">RT</a> |  | 5     | 4.2E-1  | 1.0E0     |
| <input type="checkbox"/> | GOTERM_BP_ALL   | <a href="#">biopolymer catabolic process</a>                               | <a href="#">RT</a> |  | 5     | 4.3E-1  | 1.0E0     |
| <input type="checkbox"/> | GOTERM_BP_ALL   | <a href="#">protein catabolic process</a>                                  | <a href="#">RT</a> |  | 4     | 4.7E-1  | 1.0E0     |
| <input type="checkbox"/> | GOTERM_BP_ALL   | <a href="#">ubiquitin-dependent protein catabolic process</a>              | <a href="#">RT</a> |  | 3     | 5.3E-1  | 1.0E0     |
| <input type="checkbox"/> | GOTERM_BP_ALL   | <a href="#">modification-dependent macromolecule catabolic process</a>     | <a href="#">RT</a> |  | 3     | 5.4E-1  | 1.0E0     |
| <input type="checkbox"/> | GOTERM_BP_ALL   | <a href="#">modification-dependent protein catabolic process</a>           | <a href="#">RT</a> |  | 3     | 5.4E-1  | 1.0E0     |
| <input type="checkbox"/> | GOTERM_BP_ALL   | <a href="#">proteolysis involved in cellular protein catabolic process</a> | <a href="#">RT</a> |  | 3     | 5.6E-1  | 1.0E0     |
| <input type="checkbox"/> | GOTERM_BP_ALL   | <a href="#">cellular protein catabolic process</a>                         | <a href="#">RT</a> |  | 3     | 5.6E-1  | 1.0E0     |
| <input type="checkbox"/> | GOTERM_BP_ALL   | <a href="#">cellular catabolic process</a>                                 | <a href="#">RT</a> |  | 5     | 8.4E-1  | 1.0E0     |

|                          |                 |                                                                                                   |                    |  |       |         |           |
|--------------------------|-----------------|---------------------------------------------------------------------------------------------------|--------------------|--|-------|---------|-----------|
| <input type="checkbox"/> | GOTERM_BP_ALL   | <a href="#">catabolic process</a>                                                                 | <a href="#">RT</a> |  | 6     | 8.7E-1  | 1.0E0     |
| <input type="checkbox"/> | SP_PIR_KEYWORDS | <a href="#">protease</a>                                                                          | <a href="#">RT</a> |  | 4     | 9.4E-1  | 1.0E0     |
| <input type="checkbox"/> | GOTERM_MF_ALL   | <a href="#">peptidase activity</a>                                                                | <a href="#">RT</a> |  | 5     | 9.6E-1  | 1.0E0     |
| <input type="checkbox"/> | GOTERM_MF_ALL   | <a href="#">endopeptidase activity</a>                                                            | <a href="#">RT</a> |  | 3     | 9.6E-1  | 1.0E0     |
| <input type="checkbox"/> | GOTERM_BP_ALL   | <a href="#">proteolysis</a>                                                                       | <a href="#">RT</a> |  | 5     | 9.8E-1  | 1.0E0     |
| Annotation Cluster 41    |                 | Enrichment Score: 0.23                                                                            | <b>G</b>           |  | Count | P_Value | Benjamini |
| <input type="checkbox"/> | INTERPRO        | <a href="#">Zinc finger, C2H2-type</a>                                                            | <a href="#">RT</a> |  | 7     | 4.2E-1  | 1.0E0     |
| <input type="checkbox"/> | SMART           | <a href="#">ZnF_C2H2</a>                                                                          | <a href="#">RT</a> |  | 4     | 6.5E-1  | 1.0E0     |
| <input type="checkbox"/> | INTERPRO        | <a href="#">Zinc finger, C2H2-like</a>                                                            | <a href="#">RT</a> |  | 4     | 7.7E-1  | 1.0E0     |
| Annotation Cluster 42    |                 | Enrichment Score: 0.22                                                                            | <b>G</b>           |  | Count | P_Value | Benjamini |
| <input type="checkbox"/> | GOTERM_MF_ALL   | <a href="#">nucleoside-triphosphatase activity</a>                                                | <a href="#">RT</a> |  | 8     | 4.0E-1  | 1.0E0     |
| <input type="checkbox"/> | GOTERM_MF_ALL   | <a href="#">pyrophosphatase activity</a>                                                          | <a href="#">RT</a> |  | 8     | 4.4E-1  | 1.0E0     |
| <input type="checkbox"/> | GOTERM_MF_ALL   | <a href="#">hydrolase activity, acting on acid anhydrides in phosphorus-containing anhydrides</a> | <a href="#">RT</a> |  | 8     | 4.5E-1  | 1.0E0     |
| <input type="checkbox"/> | GOTERM_MF_ALL   | <a href="#">hydrolase activity, acting on acid anhydrides</a>                                     | <a href="#">RT</a> |  | 8     | 4.6E-1  | 1.0E0     |
| <input type="checkbox"/> | GOTERM_MF_ALL   | <a href="#">ATPase activity</a>                                                                   | <a href="#">RT</a> |  | 5     | 5.0E-1  | 1.0E0     |
| <input type="checkbox"/> | GOTERM_MF_ALL   | <a href="#">GTPase activity</a>                                                                   | <a href="#">RT</a> |  | 3     | 5.1E-1  | 1.0E0     |
| <input type="checkbox"/> | GOTERM_MF_ALL   | <a href="#">ATPase activity, coupled</a>                                                          | <a href="#">RT</a> |  | 4     | 6.1E-1  | 1.0E0     |
| <input type="checkbox"/> | SP_PIR_KEYWORDS | <a href="#">GTP-binding</a>                                                                       | <a href="#">RT</a> |  | 3     | 8.6E-1  | 1.0E0     |
| <input type="checkbox"/> | GOTERM_MF_ALL   | <a href="#">GTP binding</a>                                                                       | <a href="#">RT</a> |  | 3     | 9.0E-1  | 1.0E0     |
| <input type="checkbox"/> | GOTERM_MF_ALL   | <a href="#">guanyl nucleotide binding</a>                                                         | <a href="#">RT</a> |  | 3     | 9.0E-1  | 1.0E0     |
| <input type="checkbox"/> | GOTERM_MF_ALL   | <a href="#">guanyl ribonucleotide binding</a>                                                     | <a href="#">RT</a> |  | 3     | 9.0E-1  | 1.0E0     |
| Annotation Cluster 43    |                 | Enrichment Score: 0.22                                                                            | <b>G</b>           |  | Count | P_Value | Benjamini |
| <input type="checkbox"/> | SP_PIR_KEYWORDS | <a href="#">angiogenesis</a>                                                                      | <a href="#">RT</a> |  | 3     | 8.9E-2  | 9.5E-1    |
| <input type="checkbox"/> | GOTERM_BP_ALL   | <a href="#">blood vessel development</a>                                                          | <a href="#">RT</a> |  | 4     | 5.7E-1  | 1.0E0     |
| <input type="checkbox"/> | GOTERM_BP_ALL   | <a href="#">vasculature development</a>                                                           | <a href="#">RT</a> |  | 4     | 5.8E-1  | 1.0E0     |
| <input type="checkbox"/> | GOTERM_BP_ALL   | <a href="#">angiogenesis</a>                                                                      | <a href="#">RT</a> |  | 3     | 6.0E-1  | 1.0E0     |
| <input type="checkbox"/> | SP_PIR_KEYWORDS | <a href="#">differentiation</a>                                                                   | <a href="#">RT</a> |  | 5     | 6.0E-1  | 1.0E0     |
| <input type="checkbox"/> | GOTERM_BP_ALL   | <a href="#">reproduction</a>                                                                      | <a href="#">RT</a> |  | 6     | 6.8E-1  | 1.0E0     |
| <input type="checkbox"/> | GOTERM_BP_ALL   | <a href="#">blood vessel morphogenesis</a>                                                        | <a href="#">RT</a> |  | 3     | 7.3E-1  | 1.0E0     |
| <input type="checkbox"/> | GOTERM_BP_ALL   | <a href="#">anatomical structure formation</a>                                                    | <a href="#">RT</a> |  | 3     | 7.5E-1  | 1.0E0     |
| <input type="checkbox"/> | SP_PIR_KEYWORDS | <a href="#">Developmental protein</a>                                                             | <a href="#">RT</a> |  | 5     | 9.7E-1  | 1.0E0     |
| <input type="checkbox"/> | GOTERM_BP_ALL   | <a href="#">organ morphogenesis</a>                                                               | <a href="#">RT</a> |  | 4     | 9.7E-1  | 1.0E0     |
| <input type="checkbox"/> | GOTERM_BP_ALL   | <a href="#">anatomical structure morphogenesis</a>                                                | <a href="#">RT</a> |  | 7     | 1.0E0   | 1.0E0     |
| Annotation Cluster 44    |                 | Enrichment Score: 0.21                                                                            | <b>G</b>           |  | Count | P_Value | Benjamini |
| <input type="checkbox"/> | GOTERM_MF_ALL   | <a href="#">ligase activity</a>                                                                   | <a href="#">RT</a> |  | 7     | 2.2E-1  | 1.0E0     |
| <input type="checkbox"/> | GOTERM_BP_ALL   | <a href="#">cellular biosynthetic process</a>                                                     | <a href="#">RT</a> |  | 11    | 7.4E-1  | 1.0E0     |
| <input type="checkbox"/> | GOTERM_BP_ALL   | <a href="#">carboxylic acid metabolic process</a>                                                 | <a href="#">RT</a> |  | 4     | 9.5E-1  | 1.0E0     |
| <input type="checkbox"/> | GOTERM_BP_ALL   | <a href="#">organic acid metabolic process</a>                                                    | <a href="#">RT</a> |  | 4     | 9.5E-1  | 1.0E0     |
| Annotation Cluster 45    |                 | Enrichment Score: 0.19                                                                            | <b>G</b>           |  | Count | P_Value | Benjamini |
| <input type="checkbox"/> | GOTERM_BP_ALL   | <a href="#">glucose metabolic process</a>                                                         | <a href="#">RT</a> |  | 3     | 4.1E-1  | 1.0E0     |
| <input type="checkbox"/> | GOTERM_BP_ALL   | <a href="#">hexose metabolic process</a>                                                          | <a href="#">RT</a> |  | 3     | 5.6E-1  | 1.0E0     |
| <input type="checkbox"/> | GOTERM_BP_ALL   | <a href="#">monosaccharide metabolic process</a>                                                  | <a href="#">RT</a> |  | 3     | 5.7E-1  | 1.0E0     |
| <input type="checkbox"/> | GOTERM_BP_ALL   | <a href="#">carbohydrate metabolic process</a>                                                    | <a href="#">RT</a> |  | 6     | 5.9E-1  | 1.0E0     |
| <input type="checkbox"/> | GOTERM_BP_ALL   | <a href="#">alcohol metabolic process</a>                                                         | <a href="#">RT</a> |  | 4     | 6.9E-1  | 1.0E0     |
| <input type="checkbox"/> | GOTERM_BP_ALL   | <a href="#">cellular carbohydrate metabolic process</a>                                           | <a href="#">RT</a> |  | 3     | 8.7E-1  | 1.0E0     |
| <input type="checkbox"/> | GOTERM_BP_ALL   | <a href="#">macromolecule biosynthetic process</a>                                                | <a href="#">RT</a> |  | 5     | 9.8E-1  | 1.0E0     |
| Annotation Cluster 46    |                 | Enrichment Score: 0.18                                                                            | <b>G</b>           |  | Count | P_Value | Benjamini |
| <input type="checkbox"/> | GOTERM_MF_ALL   | <a href="#">hydrolase activity, acting on ester bonds</a>                                         | <a href="#">RT</a> |  | 9     | 4.3E-1  | 1.0E0     |



| <input type="checkbox"/> | Category              | Term                                                                                                         | RT                     | Bar      | Count | P_Value | Benjamini |           |
|--------------------------|-----------------------|--------------------------------------------------------------------------------------------------------------|------------------------|----------|-------|---------|-----------|-----------|
| <input type="checkbox"/> | GOTERM_MF_ALL         | <a href="#">hydrolase activity</a>                                                                           | RT                     |          | 23    | 7.4E-1  | 1.0E0     |           |
| <input type="checkbox"/> | SP_PIR_KEYWORDS       | <a href="#">hydrolase</a>                                                                                    | RT                     |          | 13    | 8.9E-1  | 1.0E0     |           |
|                          | Annotation Cluster 47 |                                                                                                              | Enrichment Score: 0.16 | <b>G</b> |       | Count   | P_Value   | Benjamini |
| <input type="checkbox"/> | GOTERM_BP_ALL         | <a href="#">gamete generation</a>                                                                            | RT                     |          | 4     | 6.2E-1  | 1.0E0     |           |
| <input type="checkbox"/> | GOTERM_BP_ALL         | <a href="#">reproduction</a>                                                                                 | RT                     |          | 6     | 6.8E-1  | 1.0E0     |           |
| <input type="checkbox"/> | GOTERM_BP_ALL         | <a href="#">male gamete generation</a>                                                                       | RT                     |          | 3     | 6.9E-1  | 1.0E0     |           |
| <input type="checkbox"/> | GOTERM_BP_ALL         | <a href="#">spermatogenesis</a>                                                                              | RT                     |          | 3     | 6.9E-1  | 1.0E0     |           |
| <input type="checkbox"/> | GOTERM_BP_ALL         | <a href="#">sexual reproduction</a>                                                                          | RT                     |          | 4     | 7.4E-1  | 1.0E0     |           |
|                          | Annotation Cluster 48 |                                                                                                              | Enrichment Score: 0.16 | <b>G</b> |       | Count   | P_Value   | Benjamini |
| <input type="checkbox"/> | GOTERM_BP_ALL         | <a href="#">in utero embryonic development</a>                                                               | RT                     |          | 3     | 4.6E-1  | 1.0E0     |           |
| <input type="checkbox"/> | GOTERM_BP_ALL         | <a href="#">chordate embryonic development</a>                                                               | RT                     |          | 3     | 7.6E-1  | 1.0E0     |           |
| <input type="checkbox"/> | GOTERM_BP_ALL         | <a href="#">embryonic development ending in birth or egg hatching</a>                                        | RT                     |          | 3     | 7.7E-1  | 1.0E0     |           |
| <input type="checkbox"/> | GOTERM_BP_ALL         | <a href="#">embryonic development</a>                                                                        | RT                     |          | 5     | 8.1E-1  | 1.0E0     |           |
|                          | Annotation Cluster 49 |                                                                                                              | Enrichment Score: 0.15 | <b>G</b> |       | Count   | P_Value   | Benjamini |
| <input type="checkbox"/> | GOTERM_BP_ALL         | <a href="#">positive regulation of signal transduction</a>                                                   | RT                     |          | 3     | 3.8E-1  | 1.0E0     |           |
| <input type="checkbox"/> | GOTERM_BP_ALL         | <a href="#">protein kinase cascade</a>                                                                       | RT                     |          | 4     | 7.0E-1  | 1.0E0     |           |
| <input type="checkbox"/> | GOTERM_BP_ALL         | <a href="#">regulation of signal transduction</a>                                                            | RT                     |          | 4     | 9.2E-1  | 1.0E0     |           |
| <input type="checkbox"/> | GOTERM_BP_ALL         | <a href="#">intracellular signaling cascade</a>                                                              | RT                     |          | 8     | 9.9E-1  | 1.0E0     |           |
|                          | Annotation Cluster 50 |                                                                                                              | Enrichment Score: 0.15 | <b>G</b> |       | Count   | P_Value   | Benjamini |
| <input type="checkbox"/> | GOTERM_MF_ALL         | <a href="#">symporter activity</a>                                                                           | RT                     |          | 3     | 4.9E-1  | 1.0E0     |           |
| <input type="checkbox"/> | GOTERM_MF_ALL         | <a href="#">secondary active transmembrane transporter activity</a>                                          | RT                     |          | 3     | 6.4E-1  | 1.0E0     |           |
| <input type="checkbox"/> | GOTERM_MF_ALL         | <a href="#">substrate-specific transmembrane transporter activity</a>                                        | RT                     |          | 7     | 8.6E-1  | 1.0E0     |           |
| <input type="checkbox"/> | GOTERM_MF_ALL         | <a href="#">active transmembrane transporter activity</a>                                                    | RT                     |          | 3     | 9.1E-1  | 1.0E0     |           |
|                          | Annotation Cluster 51 |                                                                                                              | Enrichment Score: 0.14 | <b>G</b> |       | Count   | P_Value   | Benjamini |
| <input type="checkbox"/> | GOTERM_BP_ALL         | <a href="#">positive regulation of transcription</a>                                                         | RT                     |          | 5     | 6.4E-1  | 1.0E0     |           |
| <input type="checkbox"/> | GOTERM_BP_ALL         | <a href="#">positive regulation of nucleobase, nucleoside, nucleotide and nucleic acid metabolic process</a> | RT                     |          | 5     | 6.5E-1  | 1.0E0     |           |
| <input type="checkbox"/> | GOTERM_BP_ALL         | <a href="#">positive regulation of transcription, DNA-dependent</a>                                          | RT                     |          | 4     | 7.1E-1  | 1.0E0     |           |
| <input type="checkbox"/> | SP_PIR_KEYWORDS       | <a href="#">activator</a>                                                                                    | RT                     |          | 5     | 7.5E-1  | 1.0E0     |           |
| <input type="checkbox"/> | GOTERM_BP_ALL         | <a href="#">positive regulation of cellular metabolic process</a>                                            | RT                     |          | 5     | 8.0E-1  | 1.0E0     |           |
| <input type="checkbox"/> | GOTERM_BP_ALL         | <a href="#">positive regulation of metabolic process</a>                                                     | RT                     |          | 5     | 8.4E-1  | 1.0E0     |           |
|                          | Annotation Cluster 52 |                                                                                                              | Enrichment Score: 0.09 | <b>G</b> |       | Count   | P_Value   | Benjamini |
| <input type="checkbox"/> | GOTERM_BP_ALL         | <a href="#">lymphocyte activation</a>                                                                        | RT                     |          | 3     | 7.6E-1  | 1.0E0     |           |
| <input type="checkbox"/> | GOTERM_BP_ALL         | <a href="#">leukocyte activation</a>                                                                         | RT                     |          | 3     | 8.0E-1  | 1.0E0     |           |
| <input type="checkbox"/> | GOTERM_BP_ALL         | <a href="#">immune system process</a>                                                                        | RT                     |          | 8     | 8.2E-1  | 1.0E0     |           |
| <input type="checkbox"/> | GOTERM_BP_ALL         | <a href="#">cell activation</a>                                                                              | RT                     |          | 3     | 8.3E-1  | 1.0E0     |           |
| <input type="checkbox"/> | GOTERM_BP_ALL         | <a href="#">immune system development</a>                                                                    | RT                     |          | 3     | 8.8E-1  | 1.0E0     |           |
|                          | Annotation Cluster 53 |                                                                                                              | Enrichment Score: 0.09 | <b>G</b> |       | Count   | P_Value   | Benjamini |
| <input type="checkbox"/> | GOTERM_MF_ALL         | <a href="#">transporter activity</a>                                                                         | RT                     |          | 14    | 7.2E-1  | 1.0E0     |           |
| <input type="checkbox"/> | GOTERM_MF_ALL         | <a href="#">substrate-specific transporter activity</a>                                                      | RT                     |          | 10    | 7.7E-1  | 1.0E0     |           |
| <input type="checkbox"/> | GOTERM_MF_ALL         | <a href="#">transmembrane transporter activity</a>                                                           | RT                     |          | 9     | 7.8E-1  | 1.0E0     |           |
| <input type="checkbox"/> | GOTERM_MF_ALL         | <a href="#">substrate-specific transmembrane transporter activity</a>                                        | RT                     |          | 7     | 8.6E-1  | 1.0E0     |           |
| <input type="checkbox"/> | GOTERM_BP_ALL         | <a href="#">ion transport</a>                                                                                | RT                     |          | 4     | 1.0E0   | 1.0E0     |           |
|                          | Annotation Cluster 54 |                                                                                                              | Enrichment Score: 0.08 | <b>G</b> |       | Count   | P_Value   | Benjamini |
| <input type="checkbox"/> | GOTERM_BP_ALL         | <a href="#">cell migration</a>                                                                               | RT                     |          | 4     | 7.4E-1  | 1.0E0     |           |
| <input type="checkbox"/> | GOTERM_BP_ALL         | <a href="#">positive regulation of cell proliferation</a>                                                    | RT                     |          | 3     | 7.5E-1  | 1.0E0     |           |
| <input type="checkbox"/> | GOTERM_BP_ALL         | <a href="#">cell morphogenesis</a>                                                                           | RT                     |          | 6     | 7.9E-1  | 1.0E0     |           |
| <input type="checkbox"/> | GOTERM_BP_ALL         | <a href="#">cellular structure morphogenesis</a>                                                             | RT                     |          | 6     | 7.9E-1  | 1.0E0     |           |

| <input type="checkbox"/> | Category        | Term                                                             | RT | Bar | Count | P_Value | Benjamini |
|--------------------------|-----------------|------------------------------------------------------------------|----|-----|-------|---------|-----------|
| <input type="checkbox"/> | GOTERM_BP_ALL   | <a href="#">cell proliferation</a>                               | RT |     | 6     | 8.2E-1  | 1.0E0     |
| <input type="checkbox"/> | GOTERM_BP_ALL   | <a href="#">localization of cell</a>                             | RT |     | 4     | 8.4E-1  | 1.0E0     |
| <input type="checkbox"/> | GOTERM_BP_ALL   | <a href="#">cell motility</a>                                    | RT |     | 4     | 8.4E-1  | 1.0E0     |
| <input type="checkbox"/> | GOTERM_BP_ALL   | <a href="#">regulation of progression through cell cycle</a>     | RT |     | 4     | 8.5E-1  | 1.0E0     |
| <input type="checkbox"/> | GOTERM_BP_ALL   | <a href="#">regulation of cell cycle</a>                         | RT |     | 4     | 8.5E-1  | 1.0E0     |
| <input type="checkbox"/> | GOTERM_BP_ALL   | <a href="#">regulation of cell proliferation</a>                 | RT |     | 4     | 8.6E-1  | 1.0E0     |
| <input type="checkbox"/> | GOTERM_BP_ALL   | <a href="#">anatomical structure morphogenesis</a>               | RT |     | 7     | 1.0E0   | 1.0E0     |
| Annotation Cluster 55    |                 | Enrichment Score: 0.08                                           | G  |     | Count | P_Value | Benjamini |
| <input type="checkbox"/> | GOTERM_MF_ALL   | <a href="#">zinc ion binding</a>                                 | RT |     | 22    | 6.2E-1  | 1.0E0     |
| <input type="checkbox"/> | SP_PIR_KEYWORDS | <a href="#">zinc-finger</a>                                      | RT |     | 15    | 6.8E-1  | 1.0E0     |
| <input type="checkbox"/> | SP_PIR_KEYWORDS | <a href="#">zinc</a>                                             | RT |     | 18    | 7.7E-1  | 1.0E0     |
| <input type="checkbox"/> | GOTERM_MF_ALL   | <a href="#">transition metal ion binding</a>                     | RT |     | 25    | 7.9E-1  | 1.0E0     |
| <input type="checkbox"/> | SP_PIR_KEYWORDS | <a href="#">metal-binding</a>                                    | RT |     | 20    | 9.7E-1  | 1.0E0     |
| <input type="checkbox"/> | GOTERM_MF_ALL   | <a href="#">cation binding</a>                                   | RT |     | 28    | 9.9E-1  | 1.0E0     |
| <input type="checkbox"/> | GOTERM_MF_ALL   | <a href="#">metal ion binding</a>                                | RT |     | 30    | 9.9E-1  | 1.0E0     |
| <input type="checkbox"/> | GOTERM_MF_ALL   | <a href="#">ion binding</a>                                      | RT |     | 30    | 1.0E0   | 1.0E0     |
| Annotation Cluster 56    |                 | Enrichment Score: 0.06                                           | G  |     | Count | P_Value | Benjamini |
| <input type="checkbox"/> | GOTERM_BP_ALL   | <a href="#">cellular biosynthetic process</a>                    | RT |     | 11    | 7.4E-1  | 1.0E0     |
| <input type="checkbox"/> | GOTERM_BP_ALL   | <a href="#">biosynthetic process</a>                             | RT |     | 13    | 8.7E-1  | 1.0E0     |
| <input type="checkbox"/> | GOTERM_BP_ALL   | <a href="#">translation</a>                                      | RT |     | 4     | 9.3E-1  | 1.0E0     |
| <input type="checkbox"/> | GOTERM_BP_ALL   | <a href="#">macromolecule biosynthetic process</a>               | RT |     | 5     | 9.8E-1  | 1.0E0     |
| Annotation Cluster 57    |                 | Enrichment Score: 0.04                                           | G  |     | Count | P_Value | Benjamini |
| <input type="checkbox"/> | GOTERM_BP_ALL   | <a href="#">synaptic transmission</a>                            | RT |     | 3     | 7.6E-1  | 1.0E0     |
| <input type="checkbox"/> | GOTERM_BP_ALL   | <a href="#">transmission of nerve impulse</a>                    | RT |     | 3     | 8.3E-1  | 1.0E0     |
| <input type="checkbox"/> | GOTERM_BP_ALL   | <a href="#">cell-cell signaling</a>                              | RT |     | 3     | 9.5E-1  | 1.0E0     |
| <input type="checkbox"/> | GOTERM_BP_ALL   | <a href="#">neurological system process</a>                      | RT |     | 3     | 9.9E-1  | 1.0E0     |
| <input type="checkbox"/> | GOTERM_BP_ALL   | <a href="#">system process</a>                                   | RT |     | 3     | 1.0E0   | 1.0E0     |
| Annotation Cluster 58    |                 | Enrichment Score: 0                                              | G  |     | Count | P_Value | Benjamini |
| <input type="checkbox"/> | GOTERM_BP_ALL   | <a href="#">cell surface receptor linked signal transduction</a> | RT |     | 10    | 9.9E-1  | 1.0E0     |
| <input type="checkbox"/> | GOTERM_BP_ALL   | <a href="#">intracellular signaling cascade</a>                  | RT |     | 8     | 9.9E-1  | 1.0E0     |
| <input type="checkbox"/> | GOTERM_BP_ALL   | <a href="#">cell communication</a>                               | RT |     | 21    | 1.0E0   | 1.0E0     |
| <input type="checkbox"/> | GOTERM_BP_ALL   | <a href="#">signal transduction</a>                              | RT |     | 18    | 1.0E0   | 1.0E0     |
| Annotation Cluster 59    |                 | Enrichment Score: 0                                              | G  |     | Count | P_Value | Benjamini |
| <input type="checkbox"/> | GOTERM_BP_ALL   | <a href="#">phosphate metabolic process</a>                      | RT |     | 4     | 1.0E0   | 1.0E0     |
| <input type="checkbox"/> | GOTERM_BP_ALL   | <a href="#">phosphorus metabolic process</a>                     | RT |     | 4     | 1.0E0   | 1.0E0     |
| <input type="checkbox"/> | GOTERM_BP_ALL   | <a href="#">phosphorylation</a>                                  | RT |     | 3     | 1.0E0   | 1.0E0     |
| Annotation Cluster 60    |                 | Enrichment Score: 0                                              | G  |     | Count | P_Value | Benjamini |
| <input type="checkbox"/> | SP_PIR_KEYWORDS | <a href="#">receptor</a>                                         | RT |     | 6     | 1.0E0   | 1.0E0     |
| <input type="checkbox"/> | GOTERM_MF_ALL   | <a href="#">receptor activity</a>                                | RT |     | 7     | 1.0E0   | 1.0E0     |
| <input type="checkbox"/> | GOTERM_MF_ALL   | <a href="#">molecular transducer activity</a>                    | RT |     | 8     | 1.0E0   | 1.0E0     |
| <input type="checkbox"/> | GOTERM_MF_ALL   | <a href="#">signal transducer activity</a>                       | RT |     | 8     | 1.0E0   | 1.0E0     |
| Annotation Cluster 61    |                 | Enrichment Score: 0                                              | G  |     | Count | P_Value | Benjamini |
| <input type="checkbox"/> | GOTERM_CC_ALL   | <a href="#">integral to membrane</a>                             | RT |     | 25    | 1.0E0   | 1.0E0     |
| <input type="checkbox"/> | GOTERM_CC_ALL   | <a href="#">intrinsic to membrane</a>                            | RT |     | 25    | 1.0E0   | 1.0E0     |
| <input type="checkbox"/> | SP_PIR_KEYWORDS | <a href="#">membrane</a>                                         | RT |     | 28    | 1.0E0   | 1.0E0     |
| <input type="checkbox"/> | GOTERM_CC_ALL   | <a href="#">membrane</a>                                         | RT |     | 41    | 1.0E0   | 1.0E0     |
| <input type="checkbox"/> | GOTERM_CC_ALL   | <a href="#">membrane part</a>                                    | RT |     | 28    | 1.0E0   | 1.0E0     |
| <input type="checkbox"/> | SP_PIR_KEYWORDS | <a href="#">transmembrane</a>                                    | RT |     | 14    | 1.0E0   | 1.0E0     |
| Annotation Cluster 62    |                 | Enrichment Score: 0                                              | G  |     | Count | P_Value | Benjamini |
| <input type="checkbox"/> | UP_SEQ_FEATURE  | transmembrane region                                             | RT |     | 8     | 1.0E0   | 1.0E0     |

|                          |                       |                                         |                    |  |   |       |       |
|--------------------------|-----------------------|-----------------------------------------|--------------------|--|---|-------|-------|
| <input type="checkbox"/> | <b>UP_SEQ_FEATURE</b> | topological domain:Cytoplasmic          | <a href="#">RT</a> |  | 4 | 1.0E0 | 1.0E0 |
| <input type="checkbox"/> | <b>UP_SEQ_FEATURE</b> | glycosylation site:N-linked (GlcNAc...) | <a href="#">RT</a> |  | 6 | 1.0E0 | 1.0E0 |

87 terms were not clustered.

Please cite the web site or [Genome Biology 2003; 4\(5\):P3](#) within any publication that makes use of any methods inspired by **DAVID**.

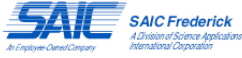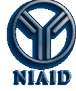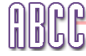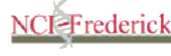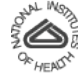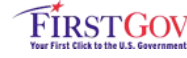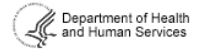

[Term of Service](#) | [Contact Us](#) | [Site Map](#)



## Functional Annotation Clustering Of Genes Downregulated <0.5 in WT BMMCs

[Help and Manual](#)

Current Gene List: wt down <.5

1751 DAVID IDs

Options Classification Stringency Medium

Rerun using options

Create Sublist

[Download File](#)

| Annotation Cluster 1     |                 | Enrichment Score: 9.43                                                                              |           | <b>G</b> |  | Count | P_Value | Benjamini |
|--------------------------|-----------------|-----------------------------------------------------------------------------------------------------|-----------|----------|--|-------|---------|-----------|
| <input type="checkbox"/> | SP_PIR_KEYWORDS | <a href="#">zinc-finger</a>                                                                         | <b>RT</b> |          |  | 170   | 3.8E-15 | 3.3E-12   |
| <input type="checkbox"/> | GOTERM_MF_ALL   | <a href="#">transition metal ion binding</a>                                                        | <b>RT</b> |          |  | 270   | 1.2E-11 | 3.2E-8    |
| <input type="checkbox"/> | GOTERM_MF_ALL   | <a href="#">zinc ion binding</a>                                                                    | <b>RT</b> |          |  | 224   | 5.2E-11 | 6.9E-8    |
| <input type="checkbox"/> | SP_PIR_KEYWORDS | <a href="#">zinc</a>                                                                                | <b>RT</b> |          |  | 186   | 2.0E-10 | 8.6E-8    |
| <input type="checkbox"/> | GOTERM_MF_ALL   | <a href="#">metal ion binding</a>                                                                   | <b>RT</b> |          |  | 363   | 7.4E-9  | 6.6E-6    |
| <input type="checkbox"/> | SP_PIR_KEYWORDS | <a href="#">metal-binding</a>                                                                       | <b>RT</b> |          |  | 231   | 1.8E-8  | 3.2E-6    |
| <input type="checkbox"/> | GOTERM_MF_ALL   | <a href="#">ion binding</a>                                                                         | <b>RT</b> |          |  | 365   | 4.1E-8  | 1.8E-5    |
| <input type="checkbox"/> | GOTERM_MF_ALL   | <a href="#">cation binding</a>                                                                      | <b>RT</b> |          |  | 332   | 1.3E-7  | 5.1E-5    |
| Annotation Cluster 2     |                 | Enrichment Score: 6.44                                                                              |           | <b>G</b> |  | Count | P_Value | Benjamini |
| <input type="checkbox"/> | GOTERM_CC_ALL   | <a href="#">nucleus</a>                                                                             | <b>RT</b> |          |  | 404   | 1.8E-12 | 1.4E-9    |
| <input type="checkbox"/> | GOTERM_BP_ALL   | <a href="#">transcription</a>                                                                       | <b>RT</b> |          |  | 262   | 1.7E-11 | 8.7E-8    |
| <input type="checkbox"/> | GOTERM_BP_ALL   | <a href="#">regulation of nucleobase, nucleoside, nucleotide and nucleic acid metabolic process</a> | <b>RT</b> |          |  | 258   | 2.8E-11 | 7.1E-8    |
| <input type="checkbox"/> | GOTERM_BP_ALL   | <a href="#">regulation of transcription</a>                                                         | <b>RT</b> |          |  | 254   | 3.2E-11 | 5.5E-8    |
| <input type="checkbox"/> | GOTERM_BP_ALL   | <a href="#">regulation of transcription, DNA-dependent</a>                                          | <b>RT</b> |          |  | 243   | 6.9E-11 | 9.0E-8    |
| <input type="checkbox"/> | GOTERM_BP_ALL   | <a href="#">RNA biosynthetic process</a>                                                            | <b>RT</b> |          |  | 245   | 9.9E-11 | 1.0E-7    |
| <input type="checkbox"/> | GOTERM_BP_ALL   | <a href="#">regulation of gene expression</a>                                                       | <b>RT</b> |          |  | 265   | 1.2E-10 | 1.0E-7    |
| <input type="checkbox"/> | GOTERM_BP_ALL   | <a href="#">regulation of cellular process</a>                                                      | <b>RT</b> |          |  | 382   | 1.3E-10 | 9.5E-8    |
| <input type="checkbox"/> | GOTERM_BP_ALL   | <a href="#">transcription, DNA-dependent</a>                                                        | <b>RT</b> |          |  | 244   | 1.4E-10 | 8.8E-8    |
| <input type="checkbox"/> | GOTERM_BP_ALL   | <a href="#">biopolymer metabolic process</a>                                                        | <b>RT</b> |          |  | 446   | 2.6E-10 | 1.5E-7    |
| <input type="checkbox"/> | GOTERM_BP_ALL   | <a href="#">regulation of cellular metabolic process</a>                                            | <b>RT</b> |          |  | 272   | 2.8E-10 | 1.4E-7    |
| <input type="checkbox"/> | SP_PIR_KEYWORDS | <a href="#">nucleus</a>                                                                             | <b>RT</b> |          |  | 318   | 7.0E-10 | 1.5E-7    |
| <input type="checkbox"/> | GOTERM_BP_ALL   | <a href="#">regulation of metabolic process</a>                                                     | <b>RT</b> |          |  | 277   | 1.8E-9  | 8.6E-7    |
| <input type="checkbox"/> | GOTERM_MF_ALL   | <a href="#">DNA binding</a>                                                                         | <b>RT</b> |          |  | 218   | 8.7E-9  | 5.8E-6    |
| <input type="checkbox"/> | GOTERM_MF_ALL   | <a href="#">nucleic acid binding</a>                                                                | <b>RT</b> |          |  | 315   | 1.1E-8  | 5.7E-6    |
| <input type="checkbox"/> | GOTERM_BP_ALL   | <a href="#">regulation of biological process</a>                                                    | <b>RT</b> |          |  | 399   | 5.2E-8  | 2.2E-5    |
| <input type="checkbox"/> | GOTERM_BP_ALL   | <a href="#">biological regulation</a>                                                               | <b>RT</b> |          |  | 428   | 1.6E-7  | 5.9E-5    |
| <input type="checkbox"/> | GOTERM_CC_ALL   | <a href="#">intracellular</a>                                                                       | <b>RT</b> |          |  | 748   | 5.5E-7  | 2.1E-4    |
| <input type="checkbox"/> | SP_PIR_KEYWORDS | <a href="#">Transcription</a>                                                                       | <b>RT</b> |          |  | 146   | 7.2E-7  | 1.0E-4    |
| <input type="checkbox"/> | GOTERM_CC_ALL   | <a href="#">membrane-bound organelle</a>                                                            | <b>RT</b> |          |  | 553   | 9.3E-7  | 2.4E-4    |
| <input type="checkbox"/> | GOTERM_CC_ALL   | <a href="#">intracellular membrane-bound organelle</a>                                              | <b>RT</b> |          |  | 552   | 1.1E-6  | 2.1E-4    |
| <input type="checkbox"/> | SP_PIR_KEYWORDS | <a href="#">Transcription regulation</a>                                                            | <b>RT</b> |          |  | 143   | 1.1E-6  | 1.3E-4    |
| <input type="checkbox"/> | GOTERM_BP_ALL   | <a href="#">RNA metabolic process</a>                                                               | <b>RT</b> |          |  | 261   | 2.1E-6  | 6.1E-4    |
| <input type="checkbox"/> | SP_PIR_KEYWORDS | <a href="#">dna-binding</a>                                                                         | <b>RT</b> |          |  | 143   | 2.2E-6  | 2.2E-4    |
| <input type="checkbox"/> | GOTERM_BP_ALL   | <a href="#">nucleobase, nucleoside, nucleotide and nucleic acid metabolic process</a>               | <b>RT</b> |          |  | 320   | 8.9E-6  | 2.4E-3    |
| <input type="checkbox"/> | GOTERM_BP_ALL   | <a href="#">cellular metabolic process</a>                                                          | <b>RT</b> |          |  | 601   | 1.6E-5  | 3.9E-3    |
| <input type="checkbox"/> | GOTERM_CC_ALL   | <a href="#">intracellular part</a>                                                                  | <b>RT</b> |          |  | 703   | 2.6E-5  | 4.0E-3    |
| <input type="checkbox"/> | GOTERM_BP_ALL   | <a href="#">gene expression</a>                                                                     | <b>RT</b> |          |  | 289   | 1.4E-4  | 2.5E-2    |

|                          |                 |                                                               |                    |  |       |         |           |
|--------------------------|-----------------|---------------------------------------------------------------|--------------------|--|-------|---------|-----------|
| <input type="checkbox"/> | GOTERM_CC_ALL   | <a href="#">cell</a>                                          | <a href="#">RT</a> |  | 963   | 1.6E-4  | 1.8E-2    |
| <input type="checkbox"/> | GOTERM_CC_ALL   | <a href="#">cell part</a>                                     | <a href="#">RT</a> |  | 963   | 1.6E-4  | 1.8E-2    |
| <input type="checkbox"/> | GOTERM_BP_ALL   | <a href="#">cellular process</a>                              | <a href="#">RT</a> |  | 867   | 1.9E-4  | 3.4E-2    |
| <input type="checkbox"/> | GOTERM_BP_ALL   | <a href="#">macromolecule metabolic process</a>               | <a href="#">RT</a> |  | 521   | 3.6E-4  | 6.1E-2    |
| <input type="checkbox"/> | GOTERM_CC_ALL   | <a href="#">organelle</a>                                     | <a href="#">RT</a> |  | 590   | 5.1E-4  | 4.8E-2    |
| <input type="checkbox"/> | GOTERM_BP_ALL   | <a href="#">metabolic process</a>                             | <a href="#">RT</a> |  | 646   | 5.1E-4  | 8.2E-2    |
| <input type="checkbox"/> | GOTERM_CC_ALL   | <a href="#">intracellular organelle</a>                       | <a href="#">RT</a> |  | 589   | 5.8E-4  | 4.9E-2    |
| <input type="checkbox"/> | GOTERM_MF_ALL   | <a href="#">transcription regulator activity</a>              | <a href="#">RT</a> |  | 131   | 6.2E-4  | 1.4E-1    |
| <input type="checkbox"/> | GOTERM_MF_ALL   | <a href="#">binding</a>                                       | <a href="#">RT</a> |  | 872   | 7.2E-4  | 1.4E-1    |
| <input type="checkbox"/> | GOTERM_BP_ALL   | <a href="#">primary metabolic process</a>                     | <a href="#">RT</a> |  | 586   | 9.1E-4  | 1.3E-1    |
| <input type="checkbox"/> | GOTERM_MF_ALL   | <a href="#">transcription factor activity</a>                 | <a href="#">RT</a> |  | 88    | 2.6E-2  | 9.1E-1    |
| <input type="checkbox"/> | GOTERM_MF_ALL   | <a href="#">sequence-specific DNA binding</a>                 | <a href="#">RT</a> |  | 50    | 4.7E-2  | 9.5E-1    |
| Annotation Cluster 3     |                 | Enrichment Score: 4.91                                        | <b>G</b>           |  | Count | P_Value | Benjamini |
| <input type="checkbox"/> | INTERPRO        | <a href="#">Interferon alpha, beta and delta</a>              | <a href="#">RT</a> |  | 13    | 5.5E-11 | 1.6E-7    |
| <input type="checkbox"/> | PIR_SUPERFAMILY | PIRSF001934:interferon alpha                                  | <a href="#">RT</a> |  | 13    | 1.4E-10 | 4.2E-7    |
| <input type="checkbox"/> | SMART           | <a href="#">IFabd</a>                                         | <a href="#">RT</a> |  | 13    | 2.9E-10 | 1.8E-7    |
| <input type="checkbox"/> | SP_PIR_KEYWORDS | <a href="#">antiviral defense</a>                             | <a href="#">RT</a> |  | 16    | 4.0E-10 | 1.2E-7    |
| <input type="checkbox"/> | INTERPRO        | <a href="#">Interferon alpha</a>                              | <a href="#">RT</a> |  | 11    | 1.6E-9  | 3.1E-6    |
| <input type="checkbox"/> | GOTERM_BP_ALL   | <a href="#">response to virus</a>                             | <a href="#">RT</a> |  | 19    | 7.8E-8  | 3.1E-5    |
| <input type="checkbox"/> | KEGG_PATHWAY    | <a href="#">Regulation of autophagy</a>                       | <a href="#">RT</a> |  | 13    | 7.3E-7  | 1.5E-4    |
| <input type="checkbox"/> | KEGG_PATHWAY    | <a href="#">Cytokine-cytokine receptor interaction</a>        | <a href="#">RT</a> |  | 40    | 1.4E-6  | 1.5E-4    |
| <input type="checkbox"/> | KEGG_PATHWAY    | <a href="#">Jak-STAT signaling pathway</a>                    | <a href="#">RT</a> |  | 29    | 3.2E-6  | 2.3E-4    |
| <input type="checkbox"/> | KEGG_PATHWAY    | <a href="#">Toll-like receptor signaling pathway</a>          | <a href="#">RT</a> |  | 23    | 3.7E-6  | 2.0E-4    |
| <input type="checkbox"/> | KEGG_PATHWAY    | <a href="#">Natural killer cell mediated cytotoxicity</a>     | <a href="#">RT</a> |  | 21    | 9.3E-4  | 3.8E-2    |
| <input type="checkbox"/> | SP_PIR_KEYWORDS | <a href="#">cytokine</a>                                      | <a href="#">RT</a> |  | 26    | 1.1E-3  | 6.7E-2    |
| <input type="checkbox"/> | GOTERM_BP_ALL   | <a href="#">multi-organism process</a>                        | <a href="#">RT</a> |  | 31    | 1.9E-3  | 2.0E-1    |
| <input type="checkbox"/> | KEGG_PATHWAY    | <a href="#">Antigen processing and presentation</a>           | <a href="#">RT</a> |  | 15    | 2.1E-3  | 7.1E-2    |
| <input type="checkbox"/> | GOTERM_BP_ALL   | <a href="#">response to other organism</a>                    | <a href="#">RT</a> |  | 23    | 2.5E-3  | 2.5E-1    |
| <input type="checkbox"/> | GOTERM_BP_ALL   | <a href="#">response to biotic stimulus</a>                   | <a href="#">RT</a> |  | 30    | 8.7E-3  | 5.3E-1    |
| <input type="checkbox"/> | INTERPRO        | <a href="#">Four-helical cytokine, core</a>                   | <a href="#">RT</a> |  | 12    | 1.0E-2  | 8.7E-1    |
| <input type="checkbox"/> | GOTERM_MF_ALL   | <a href="#">cytokine activity</a>                             | <a href="#">RT</a> |  | 28    | 1.9E-2  | 8.7E-1    |
| <input type="checkbox"/> | GOTERM_BP_ALL   | <a href="#">defense response</a>                              | <a href="#">RT</a> |  | 38    | 5.1E-1  | 1.0E0     |
| <input type="checkbox"/> | GOTERM_MF_ALL   | <a href="#">receptor binding</a>                              | <a href="#">RT</a> |  | 51    | 5.6E-1  | 1.0E0     |
| Annotation Cluster 4     |                 | Enrichment Score: 4.3                                         | <b>G</b>           |  | Count | P_Value | Benjamini |
| <input type="checkbox"/> | INTERPRO        | <a href="#">Zinc finger, C2H2-type</a>                        | <a href="#">RT</a> |  | 67    | 1.8E-6  | 2.1E-3    |
| <input type="checkbox"/> | INTERPRO        | <a href="#">Zinc finger, C2H2-subtype</a>                     | <a href="#">RT</a> |  | 33    | 3.1E-5  | 3.0E-2    |
| <input type="checkbox"/> | INTERPRO        | <a href="#">KRAB box</a>                                      | <a href="#">RT</a> |  | 34    | 3.5E-5  | 2.9E-2    |
| <input type="checkbox"/> | COG_ONTOLOGY    | <a href="#">General function prediction only</a>              | <a href="#">RT</a> |  | 84    | 5.2E-5  | 4.1E-3    |
| <input type="checkbox"/> | INTERPRO        | <a href="#">Zinc finger, C2H2-type/integrase, DNA-binding</a> | <a href="#">RT</a> |  | 43    | 7.4E-5  | 4.7E-2    |
| <input type="checkbox"/> | INTERPRO        | <a href="#">Zinc finger, C2H2-like</a>                        | <a href="#">RT</a> |  | 50    | 8.9E-5  | 5.0E-2    |
| <input type="checkbox"/> | SMART           | <a href="#">KRAB</a>                                          | <a href="#">RT</a> |  | 36    | 2.3E-4  | 6.8E-2    |
| <input type="checkbox"/> | SMART           | <a href="#">ZnF_C2H2</a>                                      | <a href="#">RT</a> |  | 57    | 2.5E-4  | 5.0E-2    |
| Annotation Cluster 5     |                 | Enrichment Score: 3.54                                        | <b>G</b>           |  | Count | P_Value | Benjamini |
| <input type="checkbox"/> | GOTERM_MF_ALL   | <a href="#">transcription factor binding</a>                  | <a href="#">RT</a> |  | 39    | 3.3E-5  | 1.1E-2    |
| <input type="checkbox"/> | GOTERM_MF_ALL   | <a href="#">transcription cofactor activity</a>               | <a href="#">RT</a> |  | 28    | 8.5E-5  | 2.5E-2    |
| <input type="checkbox"/> | GOTERM_MF_ALL   | <a href="#">transcription coactivator activity</a>            | <a href="#">RT</a> |  | 17    | 6.8E-4  | 1.4E-1    |
| <input type="checkbox"/> | GOTERM_MF_ALL   | <a href="#">transcription activator activity</a>              | <a href="#">RT</a> |  | 30    | 3.6E-3  | 4.4E-1    |
| Annotation Cluster 6     |                 | Enrichment Score: 3.36                                        | <b>G</b>           |  | Count | P_Value | Benjamini |
| <input type="checkbox"/> | INTERPRO        | <a href="#">Protocadherin gamma</a>                           | <a href="#">RT</a> |  | 22    | 6.9E-23 | 4.0E-19   |

|                          |                 |                                                                            |                    |  |       |         |           |
|--------------------------|-----------------|----------------------------------------------------------------------------|--------------------|--|-------|---------|-----------|
| <input type="checkbox"/> | INTERPRO        | <a href="#">Cadherin, N-terminal</a>                                       | <a href="#">RT</a> |  | 22    | 1.4E-8  | 2.0E-5    |
| <input type="checkbox"/> | INTERPRO        | <a href="#">Cadherin</a>                                                   | <a href="#">RT</a> |  | 23    | 4.2E-5  | 3.0E-2    |
| <input type="checkbox"/> | SMART           | <a href="#">CA</a>                                                         | <a href="#">RT</a> |  | 23    | 3.8E-4  | 5.6E-2    |
| <input type="checkbox"/> | GOTERM_CC_ALL   | <a href="#">cell fraction</a>                                              | <a href="#">RT</a> |  | 55    | 2.3E-2  | 7.3E-1    |
| <input type="checkbox"/> | GOTERM_CC_ALL   | <a href="#">membrane fraction</a>                                          | <a href="#">RT</a> |  | 48    | 4.2E-2  | 8.7E-1    |
| <input type="checkbox"/> | SP_PIR_KEYWORDS | <a href="#">cell adhesion</a>                                              | <a href="#">RT</a> |  | 35    | 7.1E-2  | 8.2E-1    |
| <input type="checkbox"/> | GOTERM_BP_ALL   | <a href="#">homophilic cell adhesion</a>                                   | <a href="#">RT</a> |  | 11    | 3.8E-1  | 1.0E0     |
| <input type="checkbox"/> | GOTERM_BP_ALL   | <a href="#">biological adhesion</a>                                        | <a href="#">RT</a> |  | 56    | 4.2E-1  | 1.0E0     |
| <input type="checkbox"/> | GOTERM_BP_ALL   | <a href="#">cell adhesion</a>                                              | <a href="#">RT</a> |  | 56    | 4.2E-1  | 1.0E0     |
| <input type="checkbox"/> | SP_PIR_KEYWORDS | <a href="#">calcium</a>                                                    | <a href="#">RT</a> |  | 48    | 5.9E-1  | 1.0E0     |
| <input type="checkbox"/> | GOTERM_BP_ALL   | <a href="#">cell-cell adhesion</a>                                         | <a href="#">RT</a> |  | 20    | 6.4E-1  | 1.0E0     |
| <input type="checkbox"/> | GOTERM_MF_ALL   | <a href="#">calcium ion binding</a>                                        | <a href="#">RT</a> |  | 63    | 7.4E-1  | 1.0E0     |
| Annotation Cluster 7     |                 | Enrichment Score: 3.04                                                     | <b>G</b>           |  | Count | P_Value | Benjamini |
| <input type="checkbox"/> | GOTERM_BP_ALL   | <a href="#">establishment and/or maintenance of chromatin architecture</a> | <a href="#">RT</a> |  | 44    | 6.5E-7  | 2.2E-4    |
| <input type="checkbox"/> | GOTERM_BP_ALL   | <a href="#">DNA packaging</a>                                              | <a href="#">RT</a> |  | 44    | 1.4E-6  | 4.6E-4    |
| <input type="checkbox"/> | GOTERM_BP_ALL   | <a href="#">chromatin modification</a>                                     | <a href="#">RT</a> |  | 33    | 1.2E-5  | 3.2E-3    |
| <input type="checkbox"/> | GOTERM_BP_ALL   | <a href="#">chromosome organization and biogenesis</a>                     | <a href="#">RT</a> |  | 49    | 1.6E-5  | 3.8E-3    |
| <input type="checkbox"/> | GOTERM_BP_ALL   | <a href="#">DNA metabolic process</a>                                      | <a href="#">RT</a> |  | 78    | 5.8E-5  | 1.1E-2    |
| <input type="checkbox"/> | GOTERM_BP_ALL   | <a href="#">chromatin assembly or disassembly</a>                          | <a href="#">RT</a> |  | 19    | 1.2E-3  | 1.6E-1    |
| <input type="checkbox"/> | GOTERM_CC_ALL   | <a href="#">chromosome</a>                                                 | <a href="#">RT</a> |  | 41    | 1.5E-3  | 1.1E-1    |
| <input type="checkbox"/> | SP_PIR_KEYWORDS | <a href="#">Chromatin regulator</a>                                        | <a href="#">RT</a> |  | 17    | 4.5E-3  | 2.1E-1    |
| <input type="checkbox"/> | GOTERM_CC_ALL   | <a href="#">chromosomal part</a>                                           | <a href="#">RT</a> |  | 35    | 4.8E-3  | 2.9E-1    |
| <input type="checkbox"/> | GOTERM_BP_ALL   | <a href="#">organelle organization and biogenesis</a>                      | <a href="#">RT</a> |  | 84    | 7.4E-1  | 1.0E0     |
| <input type="checkbox"/> | GOTERM_CC_ALL   | <a href="#">intracellular non-membrane-bound organelle</a>                 | <a href="#">RT</a> |  | 94    | 9.8E-1  | 1.0E0     |
| <input type="checkbox"/> | GOTERM_CC_ALL   | <a href="#">non-membrane-bound organelle</a>                               | <a href="#">RT</a> |  | 94    | 9.8E-1  | 1.0E0     |
| Annotation Cluster 8     |                 | Enrichment Score: 2.2                                                      | <b>G</b>           |  | Count | P_Value | Benjamini |
| <input type="checkbox"/> | UP_SEQ_FEATURE  | zinc finger region:RING-type                                               | <a href="#">RT</a> |  | 19    | 1.4E-3  | 1.0E0     |
| <input type="checkbox"/> | INTERPRO        | <a href="#">Zinc finger, RING-type</a>                                     | <a href="#">RT</a> |  | 31    | 3.9E-3  | 6.6E-1    |
| <input type="checkbox"/> | INTERPRO        | <a href="#">Zinc finger, RING/FYVE/PHD-type</a>                            | <a href="#">RT</a> |  | 22    | 7.3E-3  | 8.2E-1    |
| <input type="checkbox"/> | SMART           | <a href="#">RING</a>                                                       | <a href="#">RT</a> |  | 32    | 3.9E-2  | 7.8E-1    |
| Annotation Cluster 9     |                 | Enrichment Score: 2.08                                                     | <b>G</b>           |  | Count | P_Value | Benjamini |
| <input type="checkbox"/> | GOTERM_MF_ALL   | <a href="#">ligand-dependent nuclear receptor activity</a>                 | <a href="#">RT</a> |  | 15    | 4.7E-4  | 1.2E-1    |
| <input type="checkbox"/> | INTERPRO        | <a href="#">Nuclear hormone receptor, ligand-binding, core</a>             | <a href="#">RT</a> |  | 12    | 7.0E-4  | 3.1E-1    |
| <input type="checkbox"/> | INTERPRO        | <a href="#">Nuclear hormone receptor, ligand-binding</a>                   | <a href="#">RT</a> |  | 12    | 8.5E-4  | 3.4E-1    |
| <input type="checkbox"/> | INTERPRO        | <a href="#">Zinc finger, nuclear hormone receptor-type</a>                 | <a href="#">RT</a> |  | 11    | 1.5E-3  | 4.7E-1    |
| <input type="checkbox"/> | SMART           | <a href="#">HOLI</a>                                                       | <a href="#">RT</a> |  | 12    | 2.3E-3  | 2.4E-1    |
| <input type="checkbox"/> | UP_SEQ_FEATURE  | region of interest:Modulating                                              | <a href="#">RT</a> |  | 6     | 2.5E-3  | 1.0E0     |
| <input type="checkbox"/> | INTERPRO        | <a href="#">Steroid hormone receptor</a>                                   | <a href="#">RT</a> |  | 11    | 2.6E-3  | 5.7E-1    |
| <input type="checkbox"/> | GOTERM_MF_ALL   | <a href="#">steroid hormone receptor activity</a>                          | <a href="#">RT</a> |  | 13    | 3.5E-3  | 4.4E-1    |
| <input type="checkbox"/> | UP_SEQ_FEATURE  | region of interest:Steroid-binding                                         | <a href="#">RT</a> |  | 4     | 3.6E-3  | 1.0E0     |
| <input type="checkbox"/> | SMART           | <a href="#">ZnF_C4</a>                                                     | <a href="#">RT</a> |  | 11    | 4.5E-3  | 3.2E-1    |
| <input type="checkbox"/> | INTERPRO        | <a href="#">Zinc finger, NHR/GATA-type</a>                                 | <a href="#">RT</a> |  | 9     | 8.6E-3  | 8.3E-1    |
| <input type="checkbox"/> | UP_SEQ_FEATURE  | zinc finger region:NR C4-type                                              | <a href="#">RT</a> |  | 8     | 2.0E-2  | 1.0E0     |
| <input type="checkbox"/> | UP_SEQ_FEATURE  | DNA-binding region:Nuclear receptor                                        | <a href="#">RT</a> |  | 8     | 2.0E-2  | 1.0E0     |
| <input type="checkbox"/> | SP_PIR_KEYWORDS | <a href="#">Steroid-binding</a>                                            | <a href="#">RT</a> |  | 5     | 2.9E-2  | 6.2E-1    |
| <input type="checkbox"/> | GOTERM_MF_ALL   | <a href="#">steroid binding</a>                                            | <a href="#">RT</a> |  | 10    | 3.4E-2  | 9.3E-1    |
| <input type="checkbox"/> | UP_SEQ_FEATURE  | region of interest:Hinge                                                   | <a href="#">RT</a> |  | 4     | 1.8E-1  | 1.0E0     |
| <input type="checkbox"/> | SP_PIR_KEYWORDS | <a href="#">Lipid-binding</a>                                              | <a href="#">RT</a> |  | 9     | 2.9E-1  | 9.9E-1    |

| <input type="checkbox"/> | UP_SEQ_FEATURE        | region of interest:Ligand-binding                                                                            | RT |  |  |  |  | 3     | 5.6E-1  | 1.0E0     |
|--------------------------|-----------------------|--------------------------------------------------------------------------------------------------------------|----|--|--|--|--|-------|---------|-----------|
|                          | Annotation Cluster 10 | Enrichment Score: 2.02                                                                                       | G  |  |  |  |  | Count | P_Value | Benjamini |
| <input type="checkbox"/> | GOTERM_BP_ALL         | <a href="#">negative regulation of transcription</a>                                                         | RT |  |  |  |  | 40    | 5.5E-4  | 8.5E-2    |
| <input type="checkbox"/> | GOTERM_MF_ALL         | <a href="#">transcription repressor activity</a>                                                             | RT |  |  |  |  | 27    | 1.1E-3  | 1.8E-1    |
| <input type="checkbox"/> | GOTERM_BP_ALL         | <a href="#">negative regulation of nucleobase, nucleoside, nucleotide and nucleic acid metabolic process</a> | RT |  |  |  |  | 41    | 1.1E-3  | 1.5E-1    |
| <input type="checkbox"/> | GOTERM_BP_ALL         | <a href="#">negative regulation of cellular metabolic process</a>                                            | RT |  |  |  |  | 46    | 1.1E-3  | 1.5E-1    |
| <input type="checkbox"/> | GOTERM_BP_ALL         | <a href="#">negative regulation of transcription, DNA-dependent</a>                                          | RT |  |  |  |  | 31    | 1.5E-3  | 1.8E-1    |
| <input type="checkbox"/> | GOTERM_BP_ALL         | <a href="#">transcription from RNA polymerase II promoter</a>                                                | RT |  |  |  |  | 57    | 1.7E-3  | 1.9E-1    |
| <input type="checkbox"/> | GOTERM_BP_ALL         | <a href="#">negative regulation of cellular process</a>                                                      | RT |  |  |  |  | 101   | 3.4E-3  | 3.2E-1    |
| <input type="checkbox"/> | GOTERM_MF_ALL         | <a href="#">transcription activator activity</a>                                                             | RT |  |  |  |  | 30    | 3.6E-3  | 4.4E-1    |
| <input type="checkbox"/> | GOTERM_BP_ALL         | <a href="#">negative regulation of biological process</a>                                                    | RT |  |  |  |  | 105   | 7.1E-3  | 4.9E-1    |
| <input type="checkbox"/> | GOTERM_BP_ALL         | <a href="#">negative regulation of metabolic process</a>                                                     | RT |  |  |  |  | 47    | 7.2E-3  | 4.9E-1    |
| <input type="checkbox"/> | GOTERM_BP_ALL         | <a href="#">negative regulation of transcription from RNA polymerase II promoter</a>                         | RT |  |  |  |  | 22    | 7.8E-3  | 5.1E-1    |
| <input type="checkbox"/> | GOTERM_BP_ALL         | <a href="#">regulation of transcription from RNA polymerase II promoter</a>                                  | RT |  |  |  |  | 49    | 7.8E-3  | 5.0E-1    |
| <input type="checkbox"/> | GOTERM_BP_ALL         | <a href="#">positive regulation of transcription</a>                                                         | RT |  |  |  |  | 39    | 2.9E-2  | 8.4E-1    |
| <input type="checkbox"/> | GOTERM_BP_ALL         | <a href="#">positive regulation of cellular metabolic process</a>                                            | RT |  |  |  |  | 47    | 3.3E-2  | 8.7E-1    |
| <input type="checkbox"/> | GOTERM_BP_ALL         | <a href="#">positive regulation of nucleobase, nucleoside, nucleotide and nucleic acid metabolic process</a> | RT |  |  |  |  | 39    | 3.8E-2  | 9.0E-1    |
| <input type="checkbox"/> | GOTERM_BP_ALL         | <a href="#">positive regulation of metabolic process</a>                                                     | RT |  |  |  |  | 48    | 5.7E-2  | 9.4E-1    |
| <input type="checkbox"/> | GOTERM_BP_ALL         | <a href="#">positive regulation of transcription, DNA-dependent</a>                                          | RT |  |  |  |  | 31    | 8.2E-2  | 9.7E-1    |
| <input type="checkbox"/> | GOTERM_BP_ALL         | <a href="#">positive regulation of cellular process</a>                                                      | RT |  |  |  |  | 85    | 8.4E-2  | 9.7E-1    |
| <input type="checkbox"/> | GOTERM_BP_ALL         | <a href="#">positive regulation of transcription from RNA polymerase II promoter</a>                         | RT |  |  |  |  | 23    | 1.9E-1  | 1.0E0     |
| <input type="checkbox"/> | GOTERM_BP_ALL         | <a href="#">positive regulation of biological process</a>                                                    | RT |  |  |  |  | 90    | 2.3E-1  | 1.0E0     |
|                          | Annotation Cluster 11 | Enrichment Score: 1.87                                                                                       | G  |  |  |  |  | Count | P_Value | Benjamini |
| <input type="checkbox"/> | GOTERM_BP_ALL         | <a href="#">regulation of odontogenesis</a>                                                                  | RT |  |  |  |  | 4     | 1.9E-3  | 2.1E-1    |
| <input type="checkbox"/> | GOTERM_BP_ALL         | <a href="#">regulation of odontogenesis of dentine-containing teeth</a>                                      | RT |  |  |  |  | 4     | 8.2E-3  | 5.1E-1    |
| <input type="checkbox"/> | GOTERM_BP_ALL         | <a href="#">positive regulation of odontogenesis of dentine-containing teeth</a>                             | RT |  |  |  |  | 3     | 1.8E-2  | 7.3E-1    |
| <input type="checkbox"/> | GOTERM_BP_ALL         | <a href="#">positive regulation of odontogenesis</a>                                                         | RT |  |  |  |  | 3     | 1.8E-2  | 7.3E-1    |
| <input type="checkbox"/> | GOTERM_BP_ALL         | <a href="#">odontogenesis of dentine-containing teeth</a>                                                    | RT |  |  |  |  | 8     | 2.7E-2  | 8.3E-1    |
| <input type="checkbox"/> | GOTERM_BP_ALL         | <a href="#">odontogenesis</a>                                                                                | RT |  |  |  |  | 8     | 4.5E-2  | 9.2E-1    |
|                          | Annotation Cluster 12 | Enrichment Score: 1.82                                                                                       | G  |  |  |  |  | Count | P_Value | Benjamini |
| <input type="checkbox"/> | SP_PIR_KEYWORDS       | <a href="#">bromodomain</a>                                                                                  | RT |  |  |  |  | 8     | 6.1E-3  | 2.6E-1    |
| <input type="checkbox"/> | INTERPRO              | <a href="#">Bromodomain</a>                                                                                  | RT |  |  |  |  | 9     | 6.2E-3  | 7.8E-1    |
| <input type="checkbox"/> | SMART                 | <a href="#">BROMO</a>                                                                                        | RT |  |  |  |  | 10    | 7.3E-3  | 4.3E-1    |
| <input type="checkbox"/> | UP_SEQ_FEATURE        | domain:Bromo                                                                                                 | RT |  |  |  |  | 3     | 1.9E-1  | 1.0E0     |
|                          | Annotation Cluster 13 | Enrichment Score: 1.6                                                                                        | G  |  |  |  |  | Count | P_Value | Benjamini |
| <input type="checkbox"/> | UP_SEQ_FEATURE        | zinc finger region:ZZ-type                                                                                   | RT |  |  |  |  | 4     | 1.7E-2  | 1.0E0     |
| <input type="checkbox"/> | INTERPRO              | <a href="#">Zinc finger, ZZ-type</a>                                                                         | RT |  |  |  |  | 5     | 2.4E-2  | 9.8E-1    |
| <input type="checkbox"/> | SMART                 | <a href="#">ZnF_ZZ</a>                                                                                       | RT |  |  |  |  | 5     | 3.8E-2  | 7.9E-1    |
|                          | Annotation Cluster 14 | Enrichment Score: 1.54                                                                                       | G  |  |  |  |  | Count | P_Value | Benjamini |
| <input type="checkbox"/> | GOTERM_BP_ALL         | <a href="#">biotin biosynthetic process</a>                                                                  | RT |  |  |  |  | 7     | 1.6E-6  | 4.8E-4    |
| <input type="checkbox"/> | GOTERM_BP_ALL         | <a href="#">biotin metabolic process</a>                                                                     | RT |  |  |  |  | 7     | 1.6E-5  | 3.7E-3    |
| <input type="checkbox"/> | INTERPRO              | <a href="#">Biotin synthase</a>                                                                              | RT |  |  |  |  | 4     | 1.7E-3  | 4.8E-1    |
| <input type="checkbox"/> | INTERPRO              | <a href="#">Biotin and thiamin synthesis associated</a>                                                      | RT |  |  |  |  | 4     | 1.7E-3  | 4.8E-1    |
| <input type="checkbox"/> | GOTERM_MF_ALL         | <a href="#">biotin synthase activity</a>                                                                     | RT |  |  |  |  | 4     | 1.8E-3  | 2.7E-1    |

|                          |                 |                                                                             |    |                                                                                       |       |         |           |
|--------------------------|-----------------|-----------------------------------------------------------------------------|----|---------------------------------------------------------------------------------------|-------|---------|-----------|
| <input type="checkbox"/> | INTERPRO        | <a href="#">Elongator protein 3/MiaB/NifB</a>                               | RT |                                                                                       | 5     | 5.0E-3  | 7.3E-1    |
| <input type="checkbox"/> | INTERPRO        | <a href="#">Radical SAM</a>                                                 | RT |                                                                                       | 5     | 5.0E-3  | 7.3E-1    |
| <input type="checkbox"/> | SMART           | <a href="#">Elp3</a>                                                        | RT |                                                                                       | 5     | 8.4E-3  | 4.3E-1    |
| <input type="checkbox"/> | GOTERM_MF_ALL   | <a href="#">2 iron, 2 sulfur cluster binding</a>                            | RT |                                                                                       | 6     | 1.0E-2  | 7.3E-1    |
| <input type="checkbox"/> | GOTERM_BP_ALL   | <a href="#">water-soluble vitamin biosynthetic process</a>                  | RT |                                                                                       | 7     | 1.4E-2  | 6.8E-1    |
| <input type="checkbox"/> | SP_PIR_KEYWORDS | <a href="#">biotin biosynthesis</a>                                         | RT |                                                                                       | 3     | 1.6E-2  | 4.6E-1    |
| <input type="checkbox"/> | GOTERM_BP_ALL   | <a href="#">vitamin biosynthetic process</a>                                | RT |                                                                                       | 7     | 1.7E-2  | 7.3E-1    |
| <input type="checkbox"/> | GOTERM_MF_ALL   | <a href="#">sulfurtransferase activity</a>                                  | RT |                                                                                       | 4     | 2.8E-2  | 9.1E-1    |
| <input type="checkbox"/> | SP_PIR_KEYWORDS | <a href="#">s-adenosyl-l-methionine</a>                                     | RT |                                                                                       | 11    | 3.4E-2  | 6.6E-1    |
| <input type="checkbox"/> | SP_PIR_KEYWORDS | <a href="#">iron-sulfur</a>                                                 | RT |                                                                                       | 7     | 7.1E-2  | 8.2E-1    |
| <input type="checkbox"/> | SP_PIR_KEYWORDS | <a href="#">4Fe-4S</a>                                                      | RT |                                                                                       | 5     | 8.0E-2  | 8.4E-1    |
| <input type="checkbox"/> | GOTERM_MF_ALL   | <a href="#">4 iron, 4 sulfur cluster binding</a>                            | RT |                                                                                       | 5     | 9.9E-2  | 9.9E-1    |
| <input type="checkbox"/> | GOTERM_BP_ALL   | <a href="#">sulfur compound biosynthetic process</a>                        | RT |                                                                                       | 7     | 1.2E-1  | 9.9E-1    |
| <input type="checkbox"/> | GOTERM_MF_ALL   | <a href="#">metal cluster binding</a>                                       | RT |                                                                                       | 7     | 1.8E-1  | 1.0E0     |
| <input type="checkbox"/> | GOTERM_MF_ALL   | <a href="#">iron-sulfur cluster binding</a>                                 | RT |                                                                                       | 7     | 1.8E-1  | 1.0E0     |
| <input type="checkbox"/> | GOTERM_BP_ALL   | <a href="#">water-soluble vitamin metabolic process</a>                     | RT |                                                                                       | 7     | 1.9E-1  | 1.0E0     |
| <input type="checkbox"/> | GOTERM_BP_ALL   | <a href="#">sulfur metabolic process</a>                                    | RT |                                                                                       | 10    | 1.9E-1  | 1.0E0     |
| <input type="checkbox"/> | GOTERM_BP_ALL   | <a href="#">vitamin metabolic process</a>                                   | RT |                                                                                       | 9     | 2.3E-1  | 1.0E0     |
| <input type="checkbox"/> | SP_PIR_KEYWORDS | <a href="#">2Fe-2S</a>                                                      | RT |                                                                                       | 3     | 3.2E-1  | 9.9E-1    |
| <input type="checkbox"/> | COG_ONTOLOGY    | <a href="#">Coenzyme metabolism</a>                                         | RT |                                                                                       | 5     | 3.4E-1  | 1.0E0     |
| <input type="checkbox"/> | GOTERM_BP_ALL   | <a href="#">heterocycle metabolic process</a>                               | RT |                                                                                       | 9     | 3.5E-1  | 1.0E0     |
| <input type="checkbox"/> | INTERPRO        | <a href="#">Aldolase-type TIM barrel</a>                                    | RT |                                                                                       | 4     | 4.3E-1  | 1.0E0     |
| <input type="checkbox"/> | SP_PIR_KEYWORDS | <a href="#">iron</a>                                                        | RT |                                                                                       | 21    | 4.7E-1  | 1.0E0     |
| <input type="checkbox"/> | GOTERM_BP_ALL   | <a href="#">cofactor metabolic process</a>                                  | RT |                                                                                       | 18    | 5.6E-1  | 1.0E0     |
| <input type="checkbox"/> | GOTERM_MF_ALL   | <a href="#">transferase activity, transferring sulfur-containing groups</a> | RT |                                                                                       | 5     | 6.2E-1  | 1.0E0     |
| Annotation Cluster 15    |                 | Enrichment Score: 1.54                                                      | G  |  | Count | P_Value | Benjamini |
| <input type="checkbox"/> | INTERPRO        | <a href="#">MAD homology 1, Dwarfism-type</a>                               | RT |                                                                                       | 5     | 1.4E-2  | 9.3E-1    |
| <input type="checkbox"/> | SMART           | <a href="#">DWA</a>                                                         | RT |                                                                                       | 5     | 2.3E-2  | 6.9E-1    |
| <input type="checkbox"/> | PIR_SUPERFAMILY | PIRSF018476:nuclear factor 1                                                | RT |                                                                                       | 3     | 4.2E-2  | 1.0E0     |
| <input type="checkbox"/> | INTERPRO        | <a href="#">CTF/NF-I</a>                                                    | RT |                                                                                       | 3     | 5.1E-2  | 1.0E0     |
| Annotation Cluster 16    |                 | Enrichment Score: 1.51                                                      | G  |  | Count | P_Value | Benjamini |
| <input type="checkbox"/> | INTERPRO        | <a href="#">AT-rich interaction region</a>                                  | RT |                                                                                       | 6     | 2.0E-3  | 5.0E-1    |
| <input type="checkbox"/> | SMART           | <a href="#">BRIGHT</a>                                                      | RT |                                                                                       | 6     | 3.9E-3  | 3.2E-1    |
| <input type="checkbox"/> | INTERPRO        | <a href="#">Transcription factor jumonji</a>                                | RT |                                                                                       | 4     | 5.9E-2  | 1.0E0     |
| <input type="checkbox"/> | SMART           | <a href="#">JmjC</a>                                                        | RT |                                                                                       | 5     | 7.0E-2  | 8.5E-1    |
| <input type="checkbox"/> | INTERPRO        | <a href="#">Transcription factor jumonji, JmjN</a>                          | RT |                                                                                       | 3     | 7.2E-2  | 1.0E0     |
| <input type="checkbox"/> | SMART           | <a href="#">JmjN</a>                                                        | RT |                                                                                       | 3     | 9.3E-2  | 9.1E-1    |
| <input type="checkbox"/> | INTERPRO        | <a href="#">Transcription factor jumonji/aspartyl beta-hydroxylase</a>      | RT |                                                                                       | 4     | 1.2E-1  | 1.0E0     |
| Annotation Cluster 17    |                 | Enrichment Score: 1.45                                                      | G  |  | Count | P_Value | Benjamini |
| <input type="checkbox"/> | SP_PIR_KEYWORDS | <a href="#">Chromosomal protein</a>                                         | RT |                                                                                       | 19    | 8.6E-4  | 5.6E-2    |
| <input type="checkbox"/> | GOTERM_BP_ALL   | <a href="#">chromatin assembly or disassembly</a>                           | RT |                                                                                       | 19    | 1.2E-3  | 1.6E-1    |
| <input type="checkbox"/> | PIR_SUPERFAMILY | PIRSF002050:histone H2B                                                     | RT |                                                                                       | 4     | 5.7E-3  | 1.0E0     |
| <input type="checkbox"/> | GOTERM_BP_ALL   | <a href="#">chromatin assembly</a>                                          | RT |                                                                                       | 13    | 9.2E-3  | 5.4E-1    |
| <input type="checkbox"/> | GOTERM_CC_ALL   | <a href="#">chromatin</a>                                                   | RT |                                                                                       | 22    | 1.1E-2  | 4.9E-1    |
| <input type="checkbox"/> | GOTERM_BP_ALL   | <a href="#">nucleosome assembly</a>                                         | RT |                                                                                       | 11    | 1.3E-2  | 6.6E-1    |
| <input type="checkbox"/> | INTERPRO        | <a href="#">Histone H2B</a>                                                 | RT |                                                                                       | 4     | 1.9E-2  | 9.7E-1    |
| <input type="checkbox"/> | GOTERM_CC_ALL   | <a href="#">nucleosome</a>                                                  | RT |                                                                                       | 9     | 2.3E-2  | 7.0E-1    |
| <input type="checkbox"/> | SMART           | <a href="#">H2B</a>                                                         | RT |                                                                                       | 4     | 2.8E-2  | 7.1E-1    |



| <input type="checkbox"/> | SP_PIR_KEYWORDS       | <a href="#">Nucleosome core</a>                                                 | <a href="#">RT</a> |  |  |  | 7     | 3.5E-2  | 6.6E-1    |
|--------------------------|-----------------------|---------------------------------------------------------------------------------|--------------------|--|--|--|-------|---------|-----------|
| <input type="checkbox"/> | INTERPRO              | <a href="#">Histone core</a>                                                    | <a href="#">RT</a> |  |  |  | 6     | 3.9E-2  | 1.0E0     |
| <input type="checkbox"/> | SP_PIR_KEYWORDS       | <a href="#">citrullination</a>                                                  | <a href="#">RT</a> |  |  |  | 4     | 5.7E-2  | 8.0E-1    |
| <input type="checkbox"/> | PIR_SUPERFAMILY       | PIRSF002048:histone H2A                                                         | <a href="#">RT</a> |  |  |  | 3     | 1.3E-1  | 1.0E0     |
| <input type="checkbox"/> | GOTERM_BP_ALL         | <a href="#">protein-DNA complex assembly</a>                                    | <a href="#">RT</a> |  |  |  | 11    | 1.9E-1  | 1.0E0     |
| <input type="checkbox"/> | INTERPRO              | <a href="#">Histone-fold</a>                                                    | <a href="#">RT</a> |  |  |  | 5     | 3.5E-1  | 1.0E0     |
| <input type="checkbox"/> | SMART                 | <a href="#">H2A</a>                                                             | <a href="#">RT</a> |  |  |  | 3     | 3.9E-1  | 9.9E-1    |
| <input type="checkbox"/> | GOTERM_BP_ALL         | <a href="#">cellular component assembly</a>                                     | <a href="#">RT</a> |  |  |  | 34    | 4.7E-1  | 1.0E0     |
| <input type="checkbox"/> | GOTERM_BP_ALL         | <a href="#">macromolecular complex assembly</a>                                 | <a href="#">RT</a> |  |  |  | 27    | 6.5E-1  | 1.0E0     |
|                          | Annotation Cluster 18 | Enrichment Score: 1.45                                                          | <b>G</b>           |  |  |  | Count | P_Value | Benjamini |
| <input type="checkbox"/> | PIR_SUPERFAMILY       | PIRSF002387:myelin proteolipid protein                                          | <a href="#">RT</a> |  |  |  | 3     | 1.4E-2  | 1.0E0     |
| <input type="checkbox"/> | INTERPRO              | <a href="#">Myelin proteolipid protein PLP</a>                                  | <a href="#">RT</a> |  |  |  | 3     | 5.1E-2  | 1.0E0     |
| <input type="checkbox"/> | SMART                 | <a href="#">PLP</a>                                                             | <a href="#">RT</a> |  |  |  | 3     | 6.6E-2  | 8.6E-1    |
|                          | Annotation Cluster 19 | Enrichment Score: 1.44                                                          | <b>G</b>           |  |  |  | Count | P_Value | Benjamini |
| <input type="checkbox"/> | GOTERM_BP_ALL         | <a href="#">retinal homeostasis</a>                                             | <a href="#">RT</a> |  |  |  | 4     | 1.9E-3  | 2.1E-1    |
| <input type="checkbox"/> | GOTERM_BP_ALL         | <a href="#">multicellular organismal homeostasis</a>                            | <a href="#">RT</a> |  |  |  | 5     | 1.6E-1  | 9.9E-1    |
| <input type="checkbox"/> | GOTERM_BP_ALL         | <a href="#">tissue homeostasis</a>                                              | <a href="#">RT</a> |  |  |  | 5     | 1.6E-1  | 9.9E-1    |
|                          | Annotation Cluster 20 | Enrichment Score: 1.39                                                          | <b>G</b>           |  |  |  | Count | P_Value | Benjamini |
| <input type="checkbox"/> | GOTERM_BP_ALL         | <a href="#">protein modification process</a>                                    | <a href="#">RT</a> |  |  |  | 169   | 3.0E-5  | 6.4E-3    |
| <input type="checkbox"/> | GOTERM_BP_ALL         | <a href="#">post-translational protein modification</a>                         | <a href="#">RT</a> |  |  |  | 149   | 4.8E-5  | 9.8E-3    |
| <input type="checkbox"/> | GOTERM_BP_ALL         | <a href="#">biopolymer modification</a>                                         | <a href="#">RT</a> |  |  |  | 172   | 8.1E-5  | 1.5E-2    |
| <input type="checkbox"/> | GOTERM_BP_ALL         | <a href="#">macromolecule metabolic process</a>                                 | <a href="#">RT</a> |  |  |  | 521   | 3.6E-4  | 6.1E-2    |
| <input type="checkbox"/> | GOTERM_MF_ALL         | <a href="#">protein kinase activity</a>                                         | <a href="#">RT</a> |  |  |  | 65    | 5.9E-3  | 5.8E-1    |
| <input type="checkbox"/> | SP_PIR_KEYWORDS       | <a href="#">Serine/threonine-protein kinase</a>                                 | <a href="#">RT</a> |  |  |  | 41    | 7.1E-3  | 2.8E-1    |
| <input type="checkbox"/> | GOTERM_MF_ALL         | <a href="#">phosphotransferase activity, alcohol group as acceptor</a>          | <a href="#">RT</a> |  |  |  | 73    | 9.6E-3  | 7.2E-1    |
| <input type="checkbox"/> | GOTERM_MF_ALL         | <a href="#">protein serine/threonine kinase activity</a>                        | <a href="#">RT</a> |  |  |  | 53    | 1.1E-2  | 7.3E-1    |
| <input type="checkbox"/> | GOTERM_BP_ALL         | <a href="#">protein amino acid phosphorylation</a>                              | <a href="#">RT</a> |  |  |  | 66    | 1.6E-2  | 7.1E-1    |
| <input type="checkbox"/> | UP_SEQ_FEATURE        | active site:Proton acceptor                                                     | <a href="#">RT</a> |  |  |  | 49    | 1.7E-2  | 1.0E0     |
| <input type="checkbox"/> | GOTERM_MF_ALL         | <a href="#">transferase activity, transferring phosphorus-containing groups</a> | <a href="#">RT</a> |  |  |  | 98    | 2.0E-2  | 8.7E-1    |
| <input type="checkbox"/> | INTERPRO              | <a href="#">Serine/threonine protein kinase, active site</a>                    | <a href="#">RT</a> |  |  |  | 30    | 2.3E-2  | 9.8E-1    |
| <input type="checkbox"/> | GOTERM_MF_ALL         | <a href="#">kinase activity</a>                                                 | <a href="#">RT</a> |  |  |  | 85    | 3.0E-2  | 9.1E-1    |
| <input type="checkbox"/> | UP_SEQ_FEATURE        | domain:Protein kinase                                                           | <a href="#">RT</a> |  |  |  | 36    | 3.2E-2  | 1.0E0     |
| <input type="checkbox"/> | SP_PIR_KEYWORDS       | <a href="#">transferase</a>                                                     | <a href="#">RT</a> |  |  |  | 116   | 3.8E-2  | 6.7E-1    |
| <input type="checkbox"/> | GOTERM_MF_ALL         | <a href="#">transferase activity</a>                                            | <a href="#">RT</a> |  |  |  | 160   | 3.9E-2  | 9.4E-1    |
| <input type="checkbox"/> | GOTERM_BP_ALL         | <a href="#">phosphate metabolic process</a>                                     | <a href="#">RT</a> |  |  |  | 83    | 4.0E-2  | 9.1E-1    |
| <input type="checkbox"/> | GOTERM_BP_ALL         | <a href="#">phosphorus metabolic process</a>                                    | <a href="#">RT</a> |  |  |  | 83    | 4.0E-2  | 9.1E-1    |
| <input type="checkbox"/> | GOTERM_BP_ALL         | <a href="#">phosphorylation</a>                                                 | <a href="#">RT</a> |  |  |  | 71    | 4.1E-2  | 9.1E-1    |
| <input type="checkbox"/> | INTERPRO              | <a href="#">Serine/threonine protein kinase</a>                                 | <a href="#">RT</a> |  |  |  | 24    | 5.2E-2  | 1.0E0     |
| <input type="checkbox"/> | UP_SEQ_FEATURE        | binding site:ATP                                                                | <a href="#">RT</a> |  |  |  | 37    | 5.8E-2  | 1.0E0     |
| <input type="checkbox"/> | SP_PIR_KEYWORDS       | <a href="#">kinase</a>                                                          | <a href="#">RT</a> |  |  |  | 66    | 6.4E-2  | 8.1E-1    |
| <input type="checkbox"/> | INTERPRO              | <a href="#">Protein kinase, core</a>                                            | <a href="#">RT</a> |  |  |  | 35    | 8.6E-2  | 1.0E0     |
| <input type="checkbox"/> | UP_SEQ_FEATURE        | nucleotide phosphate-binding region:ATP                                         | <a href="#">RT</a> |  |  |  | 51    | 2.0E-1  | 1.0E0     |
| <input type="checkbox"/> | GOTERM_MF_ALL         | <a href="#">protein-tyrosine kinase activity</a>                                | <a href="#">RT</a> |  |  |  | 30    | 2.2E-1  | 1.0E0     |
| <input type="checkbox"/> | SMART                 | <a href="#">S_TKc</a>                                                           | <a href="#">RT</a> |  |  |  | 37    | 2.4E-1  | 9.8E-1    |
| <input type="checkbox"/> | GOTERM_BP_ALL         | <a href="#">cellular protein metabolic process</a>                              | <a href="#">RT</a> |  |  |  | 243   | 2.6E-1  | 1.0E0     |
| <input type="checkbox"/> | GOTERM_MF_ALL         | <a href="#">nucleotide binding</a>                                              | <a href="#">RT</a> |  |  |  | 162   | 2.6E-1  | 1.0E0     |
| <input type="checkbox"/> | GOTERM_BP_ALL         | <a href="#">cellular macromolecule metabolic process</a>                        | <a href="#">RT</a> |  |  |  | 243   | 3.4E-1  | 1.0E0     |
| <input type="checkbox"/> | GOTERM_BP_ALL         | <a href="#">protein metabolic process</a>                                       | <a href="#">RT</a> |  |  |  | 249   | 3.9E-1  | 1.0E0     |

| <input type="checkbox"/> | Category        | Term                                                                     | RT | Bar | Count                  | P-Value  | Benjamini |
|--------------------------|-----------------|--------------------------------------------------------------------------|----|-----|------------------------|----------|-----------|
| <input type="checkbox"/> | GOTERM_MF_ALL   | <a href="#">ribonucleotide binding</a>                                   | RT |     | 132                    | 4.5E-1   | 1.0E0     |
| <input type="checkbox"/> | GOTERM_MF_ALL   | <a href="#">purine ribonucleotide binding</a>                            | RT |     | 132                    | 4.5E-1   | 1.0E0     |
| <input type="checkbox"/> | SP_PIR_KEYWORDS | <a href="#">nucleotide-binding</a>                                       | RT |     | 102                    | 4.6E-1   | 1.0E0     |
| <input type="checkbox"/> | GOTERM_MF_ALL   | <a href="#">purine nucleotide binding</a>                                | RT |     | 137                    | 4.7E-1   | 1.0E0     |
| <input type="checkbox"/> | SP_PIR_KEYWORDS | <a href="#">atp-binding</a>                                              | RT |     | 79                     | 5.3E-1   | 1.0E0     |
| <input type="checkbox"/> | GOTERM_MF_ALL   | <a href="#">adenyl ribonucleotide binding</a>                            | RT |     | 105                    | 5.9E-1   | 1.0E0     |
| <input type="checkbox"/> | GOTERM_MF_ALL   | <a href="#">adenyl nucleotide binding</a>                                | RT |     | 110                    | 6.0E-1   | 1.0E0     |
| <input type="checkbox"/> | GOTERM_MF_ALL   | <a href="#">ATP binding</a>                                              | RT |     | 103                    | 6.3E-1   | 1.0E0     |
| Annotation Cluster 21    |                 |                                                                          |    |     | Enrichment Score: 1.31 | <b>G</b> |           |
| <input type="checkbox"/> | UP_SEQ_FEATURE  | repeat:RCC1 4                                                            | RT |     | 4                      | 3.3E-2   | 1.0E0     |
| <input type="checkbox"/> | UP_SEQ_FEATURE  | repeat:RCC1 3                                                            | RT |     | 4                      | 3.3E-2   | 1.0E0     |
| <input type="checkbox"/> | UP_SEQ_FEATURE  | repeat:RCC1 2                                                            | RT |     | 4                      | 3.3E-2   | 1.0E0     |
| <input type="checkbox"/> | UP_SEQ_FEATURE  | repeat:RCC1 1                                                            | RT |     | 4                      | 3.3E-2   | 1.0E0     |
| <input type="checkbox"/> | UP_SEQ_FEATURE  | repeat:RCC1 5                                                            | RT |     | 4                      | 3.3E-2   | 1.0E0     |
| <input type="checkbox"/> | INTERPRO        | <a href="#">Regulator of chromosome condensation, RCC1</a>               | RT |     | 5                      | 1.2E-1   | 1.0E0     |
| <input type="checkbox"/> | COG_ONTOLOGY    | <a href="#">Cell division and chromosome partitioning / Cytoskeleton</a> | RT |     | 4                      | 1.6E-1   | 1.0E0     |
| Annotation Cluster 22    |                 |                                                                          |    |     | Enrichment Score: 1.27 | <b>G</b> |           |
| <input type="checkbox"/> | INTERPRO        | <a href="#">SANT, DNA-binding</a>                                        | RT |     | 10                     | 2.6E-2   | 9.8E-1    |
| <input type="checkbox"/> | SMART           | <a href="#">SANT</a>                                                     | RT |     | 10                     | 5.7E-2   | 8.3E-1    |
| <input type="checkbox"/> | INTERPRO        | <a href="#">Myb, DNA-binding</a>                                         | RT |     | 6                      | 1.1E-1   | 1.0E0     |
| Annotation Cluster 23    |                 |                                                                          |    |     | Enrichment Score: 1.26 | <b>G</b> |           |
| <input type="checkbox"/> | GOTERM_BP_ALL   | <a href="#">Ras protein signal transduction</a>                          | RT |     | 30                     | 6.9E-4   | 1.0E-1    |
| <input type="checkbox"/> | GOTERM_BP_ALL   | <a href="#">regulation of Ras protein signal transduction</a>            | RT |     | 23                     | 1.6E-3   | 1.9E-1    |
| <input type="checkbox"/> | GOTERM_BP_ALL   | <a href="#">regulation of small GTPase mediated signal transduction</a>  | RT |     | 26                     | 4.6E-3   | 3.9E-1    |
| <input type="checkbox"/> | GOTERM_BP_ALL   | <a href="#">small GTPase mediated signal transduction</a>                | RT |     | 47                     | 6.3E-3   | 4.7E-1    |
| <input type="checkbox"/> | GOTERM_MF_ALL   | <a href="#">Ras GTPase activator activity</a>                            | RT |     | 12                     | 1.2E-2   | 7.7E-1    |
| <input type="checkbox"/> | GOTERM_BP_ALL   | <a href="#">regulation of Rab GTPase activity</a>                        | RT |     | 8                      | 2.7E-2   | 8.3E-1    |
| <input type="checkbox"/> | GOTERM_BP_ALL   | <a href="#">Rab protein signal transduction</a>                          | RT |     | 8                      | 2.7E-2   | 8.3E-1    |
| <input type="checkbox"/> | GOTERM_BP_ALL   | <a href="#">regulation of Rab protein signal transduction</a>            | RT |     | 8                      | 2.7E-2   | 8.3E-1    |
| <input type="checkbox"/> | GOTERM_BP_ALL   | <a href="#">regulation of signal transduction</a>                        | RT |     | 47                     | 3.5E-2   | 8.8E-1    |
| <input type="checkbox"/> | GOTERM_MF_ALL   | <a href="#">small GTPase regulator activity</a>                          | RT |     | 24                     | 3.5E-2   | 9.2E-1    |
| <input type="checkbox"/> | GOTERM_MF_ALL   | <a href="#">Rab GTPase activator activity</a>                            | RT |     | 8                      | 3.7E-2   | 9.3E-1    |
| <input type="checkbox"/> | INTERPRO        | <a href="#">RabGAP/TBC</a>                                               | RT |     | 7                      | 4.9E-2   | 1.0E0     |
| <input type="checkbox"/> | GOTERM_BP_ALL   | <a href="#">regulation of Ras GTPase activity</a>                        | RT |     | 8                      | 6.1E-2   | 9.5E-1    |
| <input type="checkbox"/> | GOTERM_MF_ALL   | <a href="#">guanyl-nucleotide exchange factor activity</a>               | RT |     | 17                     | 9.1E-2   | 9.9E-1    |
| <input type="checkbox"/> | SMART           | <a href="#">TBC</a>                                                      | RT |     | 7                      | 1.2E-1   | 9.2E-1    |
| <input type="checkbox"/> | GOTERM_MF_ALL   | <a href="#">GTPase regulator activity</a>                                | RT |     | 32                     | 1.8E-1   | 1.0E0     |
| <input type="checkbox"/> | UP_SEQ_FEATURE  | domain:Rab-GAP TBC                                                       | RT |     | 3                      | 2.5E-1   | 1.0E0     |
| <input type="checkbox"/> | GOTERM_BP_ALL   | <a href="#">regulation of GTPase activity</a>                            | RT |     | 9                      | 3.2E-1   | 1.0E0     |
| <input type="checkbox"/> | GOTERM_MF_ALL   | <a href="#">GTPase activator activity</a>                                | RT |     | 16                     | 3.9E-1   | 1.0E0     |
| <input type="checkbox"/> | SP_PIR_KEYWORDS | <a href="#">gtpase activation</a>                                        | RT |     | 8                      | 4.8E-1   | 1.0E0     |
| <input type="checkbox"/> | GOTERM_MF_ALL   | <a href="#">enzyme activator activity</a>                                | RT |     | 19                     | 5.6E-1   | 1.0E0     |
| <input type="checkbox"/> | GOTERM_MF_ALL   | <a href="#">enzyme regulator activity</a>                                | RT |     | 48                     | 8.5E-1   | 1.0E0     |
| <input type="checkbox"/> | GOTERM_BP_ALL   | <a href="#">regulation of hydrolase activity</a>                         | RT |     | 10                     | 8.5E-1   | 1.0E0     |
| Annotation Cluster 24    |                 |                                                                          |    |     | Enrichment Score: 1.22 | <b>G</b> |           |
| <input type="checkbox"/> | UP_SEQ_FEATURE  | zinc finger region:GATA-type                                             | RT |     | 3                      | 3.0E-2   | 1.0E0     |
| <input type="checkbox"/> | INTERPRO        | <a href="#">Zinc finger, GATA-type</a>                                   | RT |     | 4                      | 7.3E-2   | 1.0E0     |
| <input type="checkbox"/> | SMART           | <a href="#">ZnF_GATA</a>                                                 | RT |     | 4                      | 1.0E-1   | 9.0E-1    |

| Annotation Cluster 25    |                 | Enrichment Score: 1.21                                                      | G  |  | Count | P_Value | Benjamini |
|--------------------------|-----------------|-----------------------------------------------------------------------------|----|--|-------|---------|-----------|
| <input type="checkbox"/> | SP_PIR_KEYWORDS | <a href="#">biological rhythms</a>                                          | RT |  | 6     | 9.2E-3  | 3.3E-1    |
| <input type="checkbox"/> | UP_SEQ_FEATURE  | region of interest:CSNK1E binding domain                                    | RT |  | 3     | 1.6E-2  | 1.0E0     |
| <input type="checkbox"/> | UP_SEQ_FEATURE  | region of interest:CRY binding domain                                       | RT |  | 3     | 1.6E-2  | 1.0E0     |
| <input type="checkbox"/> | GOTERM_BP_ALL   | <a href="#">two-component signal transduction system (phosphorelay)</a>     | RT |  | 7     | 1.7E-2  | 7.3E-1    |
| <input type="checkbox"/> | INTERPRO        | <a href="#">PAC motif</a>                                                   | RT |  | 6     | 2.8E-2  | 9.9E-1    |
| <input type="checkbox"/> | GOTERM_MF_ALL   | <a href="#">protein histidine kinase activity</a>                           | RT |  | 6     | 2.9E-2  | 9.0E-1    |
| <input type="checkbox"/> | GOTERM_MF_ALL   | <a href="#">two-component sensor activity</a>                               | RT |  | 5     | 4.7E-2  | 9.6E-1    |
| <input type="checkbox"/> | SMART           | <a href="#">PAC</a>                                                         | RT |  | 6     | 5.7E-2  | 8.4E-1    |
| <input type="checkbox"/> | KEGG_PATHWAY    | <a href="#">Circadian rhythm</a>                                            | RT |  | 4     | 5.8E-2  | 5.7E-1    |
| <input type="checkbox"/> | GOTERM_MF_ALL   | <a href="#">phosphotransferase activity, nitrogenous group as acceptor</a>  | RT |  | 6     | 6.2E-2  | 9.7E-1    |
| <input type="checkbox"/> | INTERPRO        | <a href="#">PAS fold-3</a>                                                  | RT |  | 5     | 6.3E-2  | 1.0E0     |
| <input type="checkbox"/> | INTERPRO        | <a href="#">PAS</a>                                                         | RT |  | 6     | 6.8E-2  | 1.0E0     |
| <input type="checkbox"/> | UP_SEQ_FEATURE  | domain:PAS 1                                                                | RT |  | 4     | 1.1E-1  | 1.0E0     |
| <input type="checkbox"/> | UP_SEQ_FEATURE  | domain:PAS 2                                                                | RT |  | 4     | 1.1E-1  | 1.0E0     |
| <input type="checkbox"/> | SMART           | <a href="#">PAS</a>                                                         | RT |  | 6     | 1.2E-1  | 9.2E-1    |
| <input type="checkbox"/> | GOTERM_BP_ALL   | <a href="#">circadian rhythm</a>                                            | RT |  | 5     | 1.8E-1  | 1.0E0     |
| <input type="checkbox"/> | UP_SEQ_FEATURE  | domain:PAC                                                                  | RT |  | 4     | 2.2E-1  | 1.0E0     |
| <input type="checkbox"/> | UP_SEQ_FEATURE  | short sequence motif:Nuclear export signal                                  | RT |  | 4     | 2.4E-1  | 1.0E0     |
| <input type="checkbox"/> | INTERPRO        | <a href="#">PAS fold</a>                                                    | RT |  | 3     | 5.1E-1  | 1.0E0     |
| Annotation Cluster 26    |                 | Enrichment Score: 1.21                                                      | G  |  | Count | P_Value | Benjamini |
| <input type="checkbox"/> | GOTERM_BP_ALL   | <a href="#">histone modification</a>                                        | RT |  | 11    | 2.3E-3  | 2.3E-1    |
| <input type="checkbox"/> | GOTERM_BP_ALL   | <a href="#">covalent chromatin modification</a>                             | RT |  | 11    | 4.4E-3  | 3.8E-1    |
| <input type="checkbox"/> | SP_PIR_KEYWORDS | <a href="#">bromodomain</a>                                                 | RT |  | 8     | 6.1E-3  | 2.6E-1    |
| <input type="checkbox"/> | KEGG_PATHWAY    | <a href="#">Notch signaling pathway</a>                                     | RT |  | 9     | 1.5E-2  | 3.0E-1    |
| <input type="checkbox"/> | GOTERM_CC_ALL   | <a href="#">histone acetyltransferase complex</a>                           | RT |  | 4     | 4.5E-2  | 8.8E-1    |
| <input type="checkbox"/> | GOTERM_MF_ALL   | <a href="#">histone acetyltransferase activity</a>                          | RT |  | 5     | 4.7E-2  | 9.6E-1    |
| <input type="checkbox"/> | GOTERM_MF_ALL   | <a href="#">lysine N-acetyltransferase activity</a>                         | RT |  | 5     | 4.7E-2  | 9.6E-1    |
| <input type="checkbox"/> | GOTERM_BP_ALL   | <a href="#">histone acetylation</a>                                         | RT |  | 4     | 5.0E-2  | 9.4E-1    |
| <input type="checkbox"/> | BIOCARTA        | <a href="#">Control of Gene Expression by Vitamin D Receptor</a>            | RT |  | 7     | 6.4E-2  | 1.0E0     |
| <input type="checkbox"/> | GOTERM_BP_ALL   | <a href="#">protein amino acid acetylation</a>                              | RT |  | 4     | 1.3E-1  | 9.9E-1    |
| <input type="checkbox"/> | GOTERM_MF_ALL   | <a href="#">N-acetyltransferase activity</a>                                | RT |  | 8     | 1.3E-1  | 1.0E0     |
| <input type="checkbox"/> | GOTERM_MF_ALL   | <a href="#">acetyltransferase activity</a>                                  | RT |  | 9     | 1.6E-1  | 1.0E0     |
| <input type="checkbox"/> | GOTERM_MF_ALL   | <a href="#">N-acyltransferase activity</a>                                  | RT |  | 8     | 2.3E-1  | 1.0E0     |
| <input type="checkbox"/> | GOTERM_CC_ALL   | <a href="#">kinetochore</a>                                                 | RT |  | 4     | 2.7E-1  | 1.0E0     |
| <input type="checkbox"/> | BIOCARTA        | <a href="#">The information-processing pathway at the IFN-beta enhancer</a> | RT |  | 3     | 3.2E-1  | 1.0E0     |
| <input type="checkbox"/> | GOTERM_BP_ALL   | <a href="#">protein amino acid acylation</a>                                | RT |  | 4     | 3.4E-1  | 1.0E0     |
| <input type="checkbox"/> | GOTERM_CC_ALL   | <a href="#">chromosome, pericentric region</a>                              | RT |  | 6     | 5.8E-1  | 1.0E0     |
| Annotation Cluster 27    |                 | Enrichment Score: 1.13                                                      | G  |  | Count | P_Value | Benjamini |
| <input type="checkbox"/> | GOTERM_BP_ALL   | <a href="#">determination of left/right symmetry</a>                        | RT |  | 8     | 1.5E-2  | 7.1E-1    |
| <input type="checkbox"/> | GOTERM_BP_ALL   | <a href="#">determination of symmetry</a>                                   | RT |  | 8     | 1.8E-2  | 7.2E-1    |
| <input type="checkbox"/> | GOTERM_BP_ALL   | <a href="#">determination of bilateral symmetry</a>                         | RT |  | 8     | 1.8E-2  | 7.2E-1    |
| <input type="checkbox"/> | GOTERM_BP_ALL   | <a href="#">pattern specification process</a>                               | RT |  | 19    | 6.1E-1  | 1.0E0     |
| <input type="checkbox"/> | GOTERM_BP_ALL   | <a href="#">regionalization</a>                                             | RT |  | 11    | 7.3E-1  | 1.0E0     |
| Annotation Cluster 28    |                 | Enrichment Score: 1.13                                                      | G  |  | Count | P_Value | Benjamini |
| <input type="checkbox"/> | UP_SEQ_FEATURE  | repeat:ANK 9                                                                | RT |  | 5     | 9.1E-3  | 1.0E0     |
| <input type="checkbox"/> | UP_SEQ_FEATURE  | repeat:ANK 8                                                                | RT |  | 5     | 1.2E-2  | 1.0E0     |
| <input type="checkbox"/> | UP_SEQ_FEATURE  | repeat:ANK 5                                                                | RT |  | 10    | 1.7E-2  | 1.0E0     |

| Annotation Type                                       | Description                                                      | RT                 | Count | P-Value | Benjamini |
|-------------------------------------------------------|------------------------------------------------------------------|--------------------|-------|---------|-----------|
| <input type="checkbox"/> UP_SEQ_FEATURE               | repeat:ANK 4                                                     | <a href="#">RT</a> | 10    | 3.8E-2  | 1.0E0     |
| <input type="checkbox"/> UP_SEQ_FEATURE               | repeat:ANK 6                                                     | <a href="#">RT</a> | 7     | 5.8E-2  | 1.0E0     |
| <input type="checkbox"/> UP_SEQ_FEATURE               | repeat:ANK 3                                                     | <a href="#">RT</a> | 11    | 6.1E-2  | 1.0E0     |
| <input type="checkbox"/> UP_SEQ_FEATURE               | repeat:ANK 7                                                     | <a href="#">RT</a> | 5     | 7.5E-2  | 1.0E0     |
| <input type="checkbox"/> UP_SEQ_FEATURE               | repeat:ANK 1                                                     | <a href="#">RT</a> | 11    | 1.3E-1  | 1.0E0     |
| <input type="checkbox"/> UP_SEQ_FEATURE               | repeat:ANK 2                                                     | <a href="#">RT</a> | 11    | 1.3E-1  | 1.0E0     |
| <input type="checkbox"/> SP_PIR_KEYWORDS              | <a href="#">ank repeat</a>                                       | <a href="#">RT</a> | 19    | 1.9E-1  | 9.5E-1    |
| <input type="checkbox"/> INTERPRO                     | <a href="#">Ankyrin</a>                                          | <a href="#">RT</a> | 14    | 6.4E-1  | 1.0E0     |
| <input type="checkbox"/> SMART                        | <a href="#">ANK</a>                                              | <a href="#">RT</a> | 17    | 7.3E-1  | 1.0E0     |
| Annotation Cluster 29 Enrichment Score: 1.08 <b>G</b> |                                                                  |                    | Count | P-Value | Benjamini |
| <input type="checkbox"/> SP_PIR_KEYWORDS              | <a href="#">apoptosis</a>                                        | <a href="#">RT</a> | 29    | 4.2E-2  | 7.0E-1    |
| <input type="checkbox"/> GOTERM_BP_ALL                | <a href="#">apoptosis</a>                                        | <a href="#">RT</a> | 67    | 5.7E-2  | 9.4E-1    |
| <input type="checkbox"/> GOTERM_BP_ALL                | <a href="#">cell death</a>                                       | <a href="#">RT</a> | 70    | 6.2E-2  | 9.5E-1    |
| <input type="checkbox"/> GOTERM_BP_ALL                | <a href="#">death</a>                                            | <a href="#">RT</a> | 70    | 6.2E-2  | 9.5E-1    |
| <input type="checkbox"/> GOTERM_BP_ALL                | <a href="#">programmed cell death</a>                            | <a href="#">RT</a> | 67    | 7.5E-2  | 9.6E-1    |
| <input type="checkbox"/> GOTERM_BP_ALL                | <a href="#">cell development</a>                                 | <a href="#">RT</a> | 112   | 7.9E-2  | 9.7E-1    |
| <input type="checkbox"/> GOTERM_BP_ALL                | <a href="#">regulation of apoptosis</a>                          | <a href="#">RT</a> | 46    | 8.8E-2  | 9.7E-1    |
| <input type="checkbox"/> GOTERM_BP_ALL                | <a href="#">regulation of programmed cell death</a>              | <a href="#">RT</a> | 46    | 1.0E-1  | 9.8E-1    |
| <input type="checkbox"/> GOTERM_BP_ALL                | <a href="#">cellular developmental process</a>                   | <a href="#">RT</a> | 157   | 1.7E-1  | 1.0E0     |
| <input type="checkbox"/> GOTERM_BP_ALL                | <a href="#">cell differentiation</a>                             | <a href="#">RT</a> | 157   | 1.7E-1  | 1.0E0     |
| Annotation Cluster 30 Enrichment Score: 1.07 <b>G</b> |                                                                  |                    | Count | P-Value | Benjamini |
| <input type="checkbox"/> INTERPRO                     | <a href="#">Zinc finger, CCCH-type</a>                           | <a href="#">RT</a> | 9     | 2.0E-2  | 9.7E-1    |
| <input type="checkbox"/> SMART                        | <a href="#">ZnF_C3H1</a>                                         | <a href="#">RT</a> | 9     | 5.3E-2  | 8.4E-1    |
| <input type="checkbox"/> UP_SEQ_FEATURE               | zinc finger region:C3H1-type 1                                   | <a href="#">RT</a> | 3     | 2.2E-1  | 1.0E0     |
| <input type="checkbox"/> UP_SEQ_FEATURE               | zinc finger region:C3H1-type 2                                   | <a href="#">RT</a> | 3     | 2.2E-1  | 1.0E0     |
| Annotation Cluster 31 Enrichment Score: 1.03 <b>G</b> |                                                                  |                    | Count | P-Value | Benjamini |
| <input type="checkbox"/> GOTERM_BP_ALL                | <a href="#">intracellular signaling cascade</a>                  | <a href="#">RT</a> | 118   | 7.3E-3  | 4.9E-1    |
| <input type="checkbox"/> GOTERM_BP_ALL                | <a href="#">signal transduction</a>                              | <a href="#">RT</a> | 225   | 6.9E-2  | 9.6E-1    |
| <input type="checkbox"/> GOTERM_BP_ALL                | <a href="#">cell communication</a>                               | <a href="#">RT</a> | 239   | 1.7E-1  | 9.9E-1    |
| <input type="checkbox"/> GOTERM_BP_ALL                | <a href="#">cell surface receptor linked signal transduction</a> | <a href="#">RT</a> | 96    | 8.8E-1  | 1.0E0     |
| Annotation Cluster 32 Enrichment Score: 1 <b>G</b>    |                                                                  |                    | Count | P-Value | Benjamini |
| <input type="checkbox"/> INTERPRO                     | <a href="#">LisH dimerisation motif</a>                          | <a href="#">RT</a> | 6     | 5.2E-2  | 1.0E0     |
| <input type="checkbox"/> UP_SEQ_FEATURE               | domain:LisH                                                      | <a href="#">RT</a> | 4     | 5.4E-2  | 1.0E0     |
| <input type="checkbox"/> SMART                        | <a href="#">LisH</a>                                             | <a href="#">RT</a> | 6     | 8.6E-2  | 9.0E-1    |
| <input type="checkbox"/> INTERPRO                     | <a href="#">CTLH, C-terminal to LisH motif</a>                   | <a href="#">RT</a> | 3     | 1.8E-1  | 1.0E0     |
| <input type="checkbox"/> SMART                        | <a href="#">CTLH</a>                                             | <a href="#">RT</a> | 3     | 2.2E-1  | 9.7E-1    |
| Annotation Cluster 33 Enrichment Score: 0.98 <b>G</b> |                                                                  |                    | Count | P-Value | Benjamini |
| <input type="checkbox"/> INTERPRO                     | <a href="#">BTB/POZ</a>                                          | <a href="#">RT</a> | 15    | 1.8E-2  | 9.6E-1    |
| <input type="checkbox"/> INTERPRO                     | <a href="#">BTB/POZ-like</a>                                     | <a href="#">RT</a> | 17    | 6.8E-2  | 1.0E0     |
| <input type="checkbox"/> INTERPRO                     | <a href="#">BTB/POZ fold</a>                                     | <a href="#">RT</a> | 16    | 1.2E-1  | 1.0E0     |
| <input type="checkbox"/> SMART                        | <a href="#">BTB</a>                                              | <a href="#">RT</a> | 18    | 1.5E-1  | 9.3E-1    |
| <input type="checkbox"/> INTERPRO                     | <a href="#">Kelch related</a>                                    | <a href="#">RT</a> | 7     | 2.0E-1  | 1.0E0     |
| <input type="checkbox"/> UP_SEQ_FEATURE               | domain:BTB                                                       | <a href="#">RT</a> | 6     | 3.3E-1  | 1.0E0     |
| Annotation Cluster 34 Enrichment Score: 0.96 <b>G</b> |                                                                  |                    | Count | P-Value | Benjamini |
| <input type="checkbox"/> GOTERM_BP_ALL                | <a href="#">anti-apoptosis</a>                                   | <a href="#">RT</a> | 14    | 7.0E-2  | 9.6E-1    |
| <input type="checkbox"/> GOTERM_BP_ALL                | <a href="#">regulation of apoptosis</a>                          | <a href="#">RT</a> | 46    | 8.8E-2  | 9.7E-1    |
| <input type="checkbox"/> GOTERM_BP_ALL                | <a href="#">regulation of programmed cell death</a>              | <a href="#">RT</a> | 46    | 1.0E-1  | 9.8E-1    |
| <input type="checkbox"/> GOTERM_BP_ALL                | <a href="#">negative regulation of apoptosis</a>                 | <a href="#">RT</a> | 21    | 1.5E-1  | 9.9E-1    |
| <input type="checkbox"/> GOTERM_BP_ALL                | <a href="#">negative regulation of programmed cell death</a>     | <a href="#">RT</a> | 21    | 1.7E-1  | 9.9E-1    |

| Annotation Cluster 35    |                 | Enrichment Score: 0.96                                                  | G                  |  | Count | P_Value | Benjamini |
|--------------------------|-----------------|-------------------------------------------------------------------------|--------------------|--|-------|---------|-----------|
| <input type="checkbox"/> | UP_SEQ_FEATURE  | repeat:Kelch 6                                                          | <a href="#">RT</a> |  | 5     | 2.6E-2  | 1.0E0     |
| <input type="checkbox"/> | UP_SEQ_FEATURE  | repeat:Kelch 5                                                          | <a href="#">RT</a> |  | 5     | 4.0E-2  | 1.0E0     |
| <input type="checkbox"/> | UP_SEQ_FEATURE  | repeat:Kelch 4                                                          | <a href="#">RT</a> |  | 5     | 5.6E-2  | 1.0E0     |
| <input type="checkbox"/> | UP_SEQ_FEATURE  | repeat:Kelch 2                                                          | <a href="#">RT</a> |  | 5     | 6.5E-2  | 1.0E0     |
| <input type="checkbox"/> | UP_SEQ_FEATURE  | repeat:Kelch 3                                                          | <a href="#">RT</a> |  | 5     | 6.5E-2  | 1.0E0     |
| <input type="checkbox"/> | UP_SEQ_FEATURE  | repeat:Kelch 1                                                          | <a href="#">RT</a> |  | 5     | 6.5E-2  | 1.0E0     |
| <input type="checkbox"/> | SP_PIR_KEYWORDS | <a href="#">kelch repeat</a>                                            | <a href="#">RT</a> |  | 7     | 1.0E-1  | 8.8E-1    |
| <input type="checkbox"/> | INTERPRO        | <a href="#">Kelch-type beta propeller</a>                               | <a href="#">RT</a> |  | 6     | 1.6E-1  | 1.0E0     |
| <input type="checkbox"/> | INTERPRO        | <a href="#">Kelch related</a>                                           | <a href="#">RT</a> |  | 7     | 2.0E-1  | 1.0E0     |
| <input type="checkbox"/> | SMART           | <a href="#">Kelch</a>                                                   | <a href="#">RT</a> |  | 8     | 2.4E-1  | 9.8E-1    |
| <input type="checkbox"/> | INTERPRO        | <a href="#">Kelch repeat type 1</a>                                     | <a href="#">RT</a> |  | 6     | 2.5E-1  | 1.0E0     |
| <input type="checkbox"/> | UP_SEQ_FEATURE  | domain:BTB                                                              | <a href="#">RT</a> |  | 6     | 3.3E-1  | 1.0E0     |
| <input type="checkbox"/> | INTERPRO        | <a href="#">BTB/Kelch-associated</a>                                    | <a href="#">RT</a> |  | 5     | 3.5E-1  | 1.0E0     |
| Annotation Cluster 36    |                 | Enrichment Score: 0.95                                                  | G                  |  | Count | P_Value | Benjamini |
| <input type="checkbox"/> | SP_PIR_KEYWORDS | <a href="#">serine/threonine-specific protein kinase</a>                | <a href="#">RT</a> |  | 8     | 1.7E-2  | 4.6E-1    |
| <input type="checkbox"/> | SP_PIR_KEYWORDS | <a href="#">ATP</a>                                                     | <a href="#">RT</a> |  | 18    | 1.3E-1  | 9.1E-1    |
| <input type="checkbox"/> | SP_PIR_KEYWORDS | <a href="#">autophosphorylation</a>                                     | <a href="#">RT</a> |  | 6     | 2.2E-1  | 9.7E-1    |
| <input type="checkbox"/> | SP_PIR_KEYWORDS | <a href="#">phosphotransferase</a>                                      | <a href="#">RT</a> |  | 13    | 3.1E-1  | 9.9E-1    |
| Annotation Cluster 37    |                 | Enrichment Score: 0.93                                                  | G                  |  | Count | P_Value | Benjamini |
| <input type="checkbox"/> | GOTERM_BP_ALL   | <a href="#">protein processing</a>                                      | <a href="#">RT</a> |  | 12    | 7.6E-2  | 9.6E-1    |
| <input type="checkbox"/> | GOTERM_BP_ALL   | <a href="#">protein amino acid autophosphorylation</a>                  | <a href="#">RT</a> |  | 7     | 1.3E-1  | 9.9E-1    |
| <input type="checkbox"/> | GOTERM_BP_ALL   | <a href="#">protein autoprocessing</a>                                  | <a href="#">RT</a> |  | 7     | 1.6E-1  | 9.9E-1    |
| Annotation Cluster 38    |                 | Enrichment Score: 0.92                                                  | G                  |  | Count | P_Value | Benjamini |
| <input type="checkbox"/> | GOTERM_BP_ALL   | <a href="#">regulation of Ras protein signal transduction</a>           | <a href="#">RT</a> |  | 23    | 1.6E-3  | 1.9E-1    |
| <input type="checkbox"/> | GOTERM_BP_ALL   | <a href="#">regulation of small GTPase mediated signal transduction</a> | <a href="#">RT</a> |  | 26    | 4.6E-3  | 3.9E-1    |
| <input type="checkbox"/> | GOTERM_MF_ALL   | <a href="#">small GTPase regulator activity</a>                         | <a href="#">RT</a> |  | 24    | 3.5E-2  | 9.2E-1    |
| <input type="checkbox"/> | GOTERM_MF_ALL   | <a href="#">guanyl-nucleotide exchange factor activity</a>              | <a href="#">RT</a> |  | 17    | 9.1E-2  | 9.9E-1    |
| <input type="checkbox"/> | SP_PIR_KEYWORDS | <a href="#">guanine-nucleotide releasing factor</a>                     | <a href="#">RT</a> |  | 10    | 1.1E-1  | 8.8E-1    |
| <input type="checkbox"/> | GOTERM_MF_ALL   | <a href="#">Ras guanyl-nucleotide exchange factor activity</a>          | <a href="#">RT</a> |  | 10    | 1.8E-1  | 1.0E0     |
| <input type="checkbox"/> | GOTERM_BP_ALL   | <a href="#">regulation of Rho protein signal transduction</a>           | <a href="#">RT</a> |  | 9     | 2.3E-1  | 1.0E0     |
| <input type="checkbox"/> | GOTERM_BP_ALL   | <a href="#">Rho protein signal transduction</a>                         | <a href="#">RT</a> |  | 11    | 2.6E-1  | 1.0E0     |
| <input type="checkbox"/> | GOTERM_MF_ALL   | <a href="#">Rho guanyl-nucleotide exchange factor activity</a>          | <a href="#">RT</a> |  | 8     | 2.9E-1  | 1.0E0     |
| <input type="checkbox"/> | INTERPRO        | <a href="#">Guanine-nucleotide dissociation stimulator, CDC24</a>       | <a href="#">RT</a> |  | 4     | 5.1E-1  | 1.0E0     |
| <input type="checkbox"/> | UP_SEQ_FEATURE  | domain:DH                                                               | <a href="#">RT</a> |  | 3     | 6.2E-1  | 1.0E0     |
| <input type="checkbox"/> | INTERPRO        | <a href="#">DH</a>                                                      | <a href="#">RT</a> |  | 5     | 6.5E-1  | 1.0E0     |
| <input type="checkbox"/> | SMART           | <a href="#">RhoGEF</a>                                                  | <a href="#">RT</a> |  | 5     | 7.6E-1  | 1.0E0     |
| Annotation Cluster 39    |                 | Enrichment Score: 0.91                                                  | G                  |  | Count | P_Value | Benjamini |
| <input type="checkbox"/> | INTERPRO        | <a href="#">Sulphatase</a>                                              | <a href="#">RT</a> |  | 4     | 5.9E-2  | 1.0E0     |
| <input type="checkbox"/> | GOTERM_MF_ALL   | <a href="#">sulfuric ester hydrolase activity</a>                       | <a href="#">RT</a> |  | 4     | 6.1E-2  | 9.7E-1    |
| <input type="checkbox"/> | INTERPRO        | <a href="#">Alkaline phosphatase</a>                                    | <a href="#">RT</a> |  | 4     | 2.0E-1  | 1.0E0     |
| <input type="checkbox"/> | SMART           | <a href="#">alkPPc</a>                                                  | <a href="#">RT</a> |  | 4     | 3.1E-1  | 9.9E-1    |
| Annotation Cluster 40    |                 | Enrichment Score: 0.89                                                  | G                  |  | Count | P_Value | Benjamini |
| <input type="checkbox"/> | UP_SEQ_FEATURE  | domain:ELM2                                                             | <a href="#">RT</a> |  | 3     | 6.7E-2  | 1.0E0     |
| <input type="checkbox"/> | UP_SEQ_FEATURE  | domain:SANT                                                             | <a href="#">RT</a> |  | 3     | 1.4E-1  | 1.0E0     |
| <input type="checkbox"/> | INTERPRO        | <a href="#">ELM2</a>                                                    | <a href="#">RT</a> |  | 3     | 2.3E-1  | 1.0E0     |
| Annotation Cluster 41    |                 | Enrichment Score: 0.88                                                  | G                  |  | Count | P_Value | Benjamini |
| <input type="checkbox"/> | GOTERM_BP_ALL   | <a href="#">skeletal muscle development</a>                             | <a href="#">RT</a> |  | 18    | 4.7E-3  | 3.8E-1    |

|                          |                       |                                                                                     |    |  |       |         |           |
|--------------------------|-----------------------|-------------------------------------------------------------------------------------|----|--|-------|---------|-----------|
| <input type="checkbox"/> | GOTERM_BP_ALL         | <a href="#">striated muscle development</a>                                         | RT |  | 21    | 6.9E-3  | 4.9E-1    |
| <input type="checkbox"/> | GOTERM_BP_ALL         | <a href="#">muscle development</a>                                                  | RT |  | 24    | 2.5E-2  | 8.1E-1    |
| <input type="checkbox"/> | GOTERM_BP_ALL         | <a href="#">myoblast maturation</a>                                                 | RT |  | 6     | 4.3E-2  | 9.2E-1    |
| <input type="checkbox"/> | GOTERM_BP_ALL         | <a href="#">cell maturation</a>                                                     | RT |  | 13    | 4.7E-2  | 9.3E-1    |
| <input type="checkbox"/> | GOTERM_BP_ALL         | <a href="#">myoblast development</a>                                                | RT |  | 6     | 5.0E-2  | 9.4E-1    |
| <input type="checkbox"/> | GOTERM_BP_ALL         | <a href="#">skeletal muscle fiber development</a>                                   | RT |  | 11    | 5.2E-2  | 9.4E-1    |
| <input type="checkbox"/> | GOTERM_BP_ALL         | <a href="#">muscle fiber development</a>                                            | RT |  | 11    | 5.2E-2  | 9.4E-1    |
| <input type="checkbox"/> | GOTERM_BP_ALL         | <a href="#">myoblast differentiation</a>                                            | RT |  | 8     | 5.5E-2  | 9.4E-1    |
| <input type="checkbox"/> | GOTERM_BP_ALL         | <a href="#">muscle cell differentiation</a>                                         | RT |  | 11    | 8.1E-2  | 9.7E-1    |
| <input type="checkbox"/> | GOTERM_BP_ALL         | <a href="#">developmental maturation</a>                                            | RT |  | 13    | 1.2E-1  | 9.9E-1    |
| <input type="checkbox"/> | GOTERM_BP_ALL         | <a href="#">striated muscle cell differentiation</a>                                | RT |  | 6     | 1.4E-1  | 9.9E-1    |
| <input type="checkbox"/> | GOTERM_BP_ALL         | <a href="#">myofibril assembly</a>                                                  | RT |  | 4     | 1.7E-1  | 9.9E-1    |
| <input type="checkbox"/> | GOTERM_BP_ALL         | <a href="#">striated muscle cell development</a>                                    | RT |  | 4     | 1.7E-1  | 9.9E-1    |
| <input type="checkbox"/> | GOTERM_BP_ALL         | <a href="#">muscle cell development</a>                                             | RT |  | 4     | 1.9E-1  | 1.0E0     |
| <input type="checkbox"/> | GOTERM_BP_ALL         | <a href="#">actomyosin structure organization and biogenesis</a>                    | RT |  | 4     | 2.7E-1  | 1.0E0     |
| <input type="checkbox"/> | GOTERM_CC_ALL         | <a href="#">myofibril</a>                                                           | RT |  | 7     | 5.6E-1  | 1.0E0     |
| <input type="checkbox"/> | GOTERM_CC_ALL         | <a href="#">contractile fiber</a>                                                   | RT |  | 7     | 5.9E-1  | 1.0E0     |
| <input type="checkbox"/> | GOTERM_CC_ALL         | <a href="#">contractile fiber part</a>                                              | RT |  | 5     | 8.1E-1  | 1.0E0     |
| <input type="checkbox"/> | GOTERM_BP_ALL         | <a href="#">actin filament-based process</a>                                        | RT |  | 13    | 9.0E-1  | 1.0E0     |
| <input type="checkbox"/> | GOTERM_CC_ALL         | <a href="#">sarcomere</a>                                                           | RT |  | 4     | 9.1E-1  | 1.0E0     |
| <input type="checkbox"/> | GOTERM_BP_ALL         | <a href="#">actin cytoskeleton organization and biogenesis</a>                      | RT |  | 11    | 9.5E-1  | 1.0E0     |
| <input type="checkbox"/> | GOTERM_BP_ALL         | <a href="#">cytoskeleton organization and biogenesis</a>                            | RT |  | 27    | 9.9E-1  | 1.0E0     |
|                          | Annotation Cluster 42 | Enrichment Score: 0.87                                                              | G  |  | Count | P_Value | Benjamini |
| <input type="checkbox"/> | INTERPRO              | <a href="#">Caspase Recruitment</a>                                                 | RT |  | 5     | 7.3E-2  | 1.0E0     |
| <input type="checkbox"/> | SMART                 | <a href="#">CARD</a>                                                                | RT |  | 5     | 1.1E-1  | 9.1E-1    |
| <input type="checkbox"/> | UP_SEQ_FEATURE        | domain:CARD                                                                         | RT |  | 3     | 3.1E-1  | 1.0E0     |
|                          | Annotation Cluster 43 | Enrichment Score: 0.87                                                              | G  |  | Count | P_Value | Benjamini |
| <input type="checkbox"/> | SMART                 | <a href="#">UBA</a>                                                                 | RT |  | 6     | 9.8E-2  | 9.0E-1    |
| <input type="checkbox"/> | INTERPRO              | <a href="#">Ubiquitin-associated/translation elongation factor EF1B, N-terminal</a> | RT |  | 7     | 1.3E-1  | 1.0E0     |
| <input type="checkbox"/> | UP_SEQ_FEATURE        | domain:UBA                                                                          | RT |  | 4     | 2.0E-1  | 1.0E0     |
|                          | Annotation Cluster 44 | Enrichment Score: 0.84                                                              | G  |  | Count | P_Value | Benjamini |
| <input type="checkbox"/> | GOTERM_BP_ALL         | <a href="#">phospholipid metabolic process</a>                                      | RT |  | 18    | 4.0E-2  | 9.1E-1    |
| <input type="checkbox"/> | GOTERM_BP_ALL         | <a href="#">membrane lipid metabolic process</a>                                    | RT |  | 20    | 1.0E-1  | 9.8E-1    |
| <input type="checkbox"/> | SP_PIR_KEYWORDS       | <a href="#">Phospholipid biosynthesis</a>                                           | RT |  | 5     | 1.3E-1  | 9.1E-1    |
| <input type="checkbox"/> | GOTERM_BP_ALL         | <a href="#">phospholipid biosynthetic process</a>                                   | RT |  | 9     | 1.6E-1  | 9.9E-1    |
| <input type="checkbox"/> | GOTERM_BP_ALL         | <a href="#">membrane lipid biosynthetic process</a>                                 | RT |  | 10    | 2.0E-1  | 1.0E0     |
| <input type="checkbox"/> | GOTERM_BP_ALL         | <a href="#">glycerophospholipid biosynthetic process</a>                            | RT |  | 4     | 5.3E-1  | 1.0E0     |
|                          | Annotation Cluster 45 | Enrichment Score: 0.83                                                              | G  |  | Count | P_Value | Benjamini |
| <input type="checkbox"/> | SMART                 | <a href="#">CHROMO</a>                                                              | RT |  | 6     | 9.8E-2  | 9.0E-1    |
| <input type="checkbox"/> | INTERPRO              | <a href="#">Chromo</a>                                                              | RT |  | 5     | 1.4E-1  | 1.0E0     |
| <input type="checkbox"/> | GOTERM_MF_ALL         | <a href="#">chromatin binding</a>                                                   | RT |  | 13    | 2.5E-1  | 1.0E0     |
|                          | Annotation Cluster 46 | Enrichment Score: 0.83                                                              | G  |  | Count | P_Value | Benjamini |
| <input type="checkbox"/> | PIR_SUPERFAMILY       | PIRSF038354:forkhead box O protein                                                  | RT |  | 3     | 1.4E-2  | 1.0E0     |
| <input type="checkbox"/> | BIOCARTA              | <a href="#">AKT Signaling Pathway</a>                                               | RT |  | 5     | 1.5E-1  | 1.0E0     |
| <input type="checkbox"/> | INTERPRO              | <a href="#">Fork head transcription factor</a>                                      | RT |  | 6     | 1.8E-1  | 1.0E0     |
| <input type="checkbox"/> | SMART                 | <a href="#">FH</a>                                                                  | RT |  | 6     | 2.6E-1  | 9.8E-1    |
| <input type="checkbox"/> | INTERPRO              | <a href="#">Winged helix repressor DNA-binding</a>                                  | RT |  | 11    | 3.2E-1  | 1.0E0     |
| <input type="checkbox"/> | UP_SEQ_FEATURE        | DNA-binding region:Fork-head                                                        | RT |  | 4     | 3.6E-1  | 1.0E0     |
|                          | Annotation Cluster 47 | Enrichment Score: 0.83                                                              | G  |  | Count | P_Value | Benjamini |

|                          |                       |                                                           |                    |  |       |         |           |
|--------------------------|-----------------------|-----------------------------------------------------------|--------------------|--|-------|---------|-----------|
| <input type="checkbox"/> | UP_SEQ_FEATURE        | repeat:WD 3                                               | <a href="#">RT</a> |  | 16    | 5.1E-2  | 1.0E0     |
| <input type="checkbox"/> | UP_SEQ_FEATURE        | repeat:WD 2                                               | <a href="#">RT</a> |  | 16    | 5.6E-2  | 1.0E0     |
| <input type="checkbox"/> | UP_SEQ_FEATURE        | repeat:WD 1                                               | <a href="#">RT</a> |  | 16    | 5.6E-2  | 1.0E0     |
| <input type="checkbox"/> | UP_SEQ_FEATURE        | repeat:WD 4                                               | <a href="#">RT</a> |  | 14    | 1.1E-1  | 1.0E0     |
| <input type="checkbox"/> | SP_PIR_KEYWORDS       | <a href="#">wd repeat</a>                                 | <a href="#">RT</a> |  | 24    | 1.2E-1  | 9.0E-1    |
| <input type="checkbox"/> | UP_SEQ_FEATURE        | repeat:WD 5                                               | <a href="#">RT</a> |  | 13    | 1.3E-1  | 1.0E0     |
| <input type="checkbox"/> | UP_SEQ_FEATURE        | repeat:WD 6                                               | <a href="#">RT</a> |  | 10    | 1.9E-1  | 1.0E0     |
| <input type="checkbox"/> | INTERPRO              | <a href="#">WD40 repeat</a>                               | <a href="#">RT</a> |  | 18    | 3.9E-1  | 1.0E0     |
| <input type="checkbox"/> | UP_SEQ_FEATURE        | repeat:WD 7                                               | <a href="#">RT</a> |  | 6     | 4.5E-1  | 1.0E0     |
| <input type="checkbox"/> | SMART                 | <a href="#">WD40</a>                                      | <a href="#">RT</a> |  | 20    | 6.0E-1  | 1.0E0     |
|                          | Annotation Cluster 48 | Enrichment Score: 0.81                                    | <b>G</b>           |  | Count | P_Value | Benjamini |
| <input type="checkbox"/> | GOTERM_MF_ALL         | <a href="#">telomeric DNA binding</a>                     | <a href="#">RT</a> |  | 4     | 2.8E-2  | 9.1E-1    |
| <input type="checkbox"/> | GOTERM_MF_ALL         | <a href="#">single-stranded DNA binding</a>               | <a href="#">RT</a> |  | 5     | 2.4E-1  | 1.0E0     |
| <input type="checkbox"/> | GOTERM_MF_ALL         | <a href="#">structure-specific DNA binding</a>            | <a href="#">RT</a> |  | 6     | 5.5E-1  | 1.0E0     |
|                          | Annotation Cluster 49 | Enrichment Score: 0.75                                    | <b>G</b>           |  | Count | P_Value | Benjamini |
| <input type="checkbox"/> | INTERPRO              | <a href="#">Pleckstrin homology-type</a>                  | <a href="#">RT</a> |  | 25    | 1.1E-1  | 1.0E0     |
| <input type="checkbox"/> | INTERPRO              | <a href="#">Pleckstrin-like</a>                           | <a href="#">RT</a> |  | 22    | 1.4E-1  | 1.0E0     |
| <input type="checkbox"/> | SMART                 | <a href="#">PH</a>                                        | <a href="#">RT</a> |  | 23    | 3.5E-1  | 9.9E-1    |
|                          | Annotation Cluster 50 | Enrichment Score: 0.75                                    | <b>G</b>           |  | Count | P_Value | Benjamini |
| <input type="checkbox"/> | GOTERM_BP_ALL         | <a href="#">regulation of growth</a>                      | <a href="#">RT</a> |  | 21    | 6.7E-2  | 9.5E-1    |
| <input type="checkbox"/> | GOTERM_BP_ALL         | <a href="#">regulation of cell size</a>                   | <a href="#">RT</a> |  | 16    | 1.3E-1  | 9.9E-1    |
| <input type="checkbox"/> | GOTERM_BP_ALL         | <a href="#">growth</a>                                    | <a href="#">RT</a> |  | 28    | 1.5E-1  | 9.9E-1    |
| <input type="checkbox"/> | GOTERM_BP_ALL         | <a href="#">cell growth</a>                               | <a href="#">RT</a> |  | 14    | 2.0E-1  | 1.0E0     |
| <input type="checkbox"/> | GOTERM_BP_ALL         | <a href="#">regulation of cell growth</a>                 | <a href="#">RT</a> |  | 11    | 3.2E-1  | 1.0E0     |
| <input type="checkbox"/> | SP_PIR_KEYWORDS       | <a href="#">growth regulation</a>                         | <a href="#">RT</a> |  | 5     | 3.8E-1  | 1.0E0     |
|                          | Annotation Cluster 51 | Enrichment Score: 0.74                                    | <b>G</b>           |  | Count | P_Value | Benjamini |
| <input type="checkbox"/> | GOTERM_BP_ALL         | <a href="#">monocarboxylic acid metabolic process</a>     | <a href="#">RT</a> |  | 28    | 2.2E-2  | 7.8E-1    |
| <input type="checkbox"/> | GOTERM_BP_ALL         | <a href="#">fatty acid metabolic process</a>              | <a href="#">RT</a> |  | 17    | 2.1E-1  | 1.0E0     |
| <input type="checkbox"/> | GOTERM_BP_ALL         | <a href="#">carboxylic acid metabolic process</a>         | <a href="#">RT</a> |  | 42    | 4.7E-1  | 1.0E0     |
| <input type="checkbox"/> | GOTERM_BP_ALL         | <a href="#">organic acid metabolic process</a>            | <a href="#">RT</a> |  | 42    | 4.9E-1  | 1.0E0     |
|                          | Annotation Cluster 52 | Enrichment Score: 0.72                                    | <b>G</b>           |  | Count | P_Value | Benjamini |
| <input type="checkbox"/> | GOTERM_MF_ALL         | <a href="#">carnitine O-palmitoyltransferase activity</a> | <a href="#">RT</a> |  | 3     | 5.2E-2  | 9.5E-1    |
| <input type="checkbox"/> | GOTERM_MF_ALL         | <a href="#">O-palmitoyltransferase activity</a>           | <a href="#">RT</a> |  | 3     | 5.2E-2  | 9.5E-1    |
| <input type="checkbox"/> | KEGG_PATHWAY          | <a href="#">Fatty acid metabolism</a>                     | <a href="#">RT</a> |  | 7     | 8.5E-2  | 6.9E-1    |
| <input type="checkbox"/> | GOTERM_MF_ALL         | <a href="#">carnitine O-acyltransferase activity</a>      | <a href="#">RT</a> |  | 3     | 9.8E-2  | 1.0E0     |
| <input type="checkbox"/> | INTERPRO              | <a href="#">Acyltransferase ChoActase/COT/CPT</a>         | <a href="#">RT</a> |  | 3     | 1.2E-1  | 1.0E0     |
| <input type="checkbox"/> | KEGG_PATHWAY          | <a href="#">PPAR signaling pathway</a>                    | <a href="#">RT</a> |  | 9     | 1.5E-1  | 8.4E-1    |
| <input type="checkbox"/> | SP_PIR_KEYWORDS       | <a href="#">lipid metabolism</a>                          | <a href="#">RT</a> |  | 12    | 1.8E-1  | 9.4E-1    |
| <input type="checkbox"/> | SP_PIR_KEYWORDS       | <a href="#">Fatty acid metabolism</a>                     | <a href="#">RT</a> |  | 6     | 3.0E-1  | 9.9E-1    |
| <input type="checkbox"/> | GOTERM_MF_ALL         | <a href="#">palmitoyltransferase activity</a>             | <a href="#">RT</a> |  | 3     | 3.6E-1  | 1.0E0     |
| <input type="checkbox"/> | GOTERM_MF_ALL         | <a href="#">O-acyltransferase activity</a>                | <a href="#">RT</a> |  | 4     | 4.6E-1  | 1.0E0     |
| <input type="checkbox"/> | SP_PIR_KEYWORDS       | <a href="#">outer membrane</a>                            | <a href="#">RT</a> |  | 3     | 6.9E-1  | 1.0E0     |
| <input type="checkbox"/> | GOTERM_CC_ALL         | <a href="#">outer membrane</a>                            | <a href="#">RT</a> |  | 5     | 8.6E-1  | 1.0E0     |
|                          | Annotation Cluster 53 | Enrichment Score: 0.72                                    | <b>G</b>           |  | Count | P_Value | Benjamini |
| <input type="checkbox"/> | GOTERM_BP_ALL         | <a href="#">suckling behavior</a>                         | <a href="#">RT</a> |  | 3     | 5.3E-2  | 9.4E-1    |
| <input type="checkbox"/> | GOTERM_BP_ALL         | <a href="#">behavioral interaction between organisms</a>  | <a href="#">RT</a> |  | 4     | 2.5E-1  | 1.0E0     |
| <input type="checkbox"/> | GOTERM_BP_ALL         | <a href="#">feeding behavior</a>                          | <a href="#">RT</a> |  | 4     | 5.3E-1  | 1.0E0     |
|                          | Annotation Cluster 54 | Enrichment Score: 0.7                                     | <b>G</b>           |  | Count | P_Value | Benjamini |
| <input type="checkbox"/> | INTERPRO              | <a href="#">Zinc finger, FYVE-type</a>                    | <a href="#">RT</a> |  | 6     | 9.5E-2  | 1.0E0     |
| <input type="checkbox"/> | SMART                 | <a href="#">FYVE</a>                                      | <a href="#">RT</a> |  | 6     | 1.5E-1  | 9.4E-1    |

| <input type="checkbox"/> | UP_SEQ_FEATURE  | zinc finger region:FYVE-type                                             | RT                     |   |  | 3     | 5.4E-1  | 1.0E0     |
|--------------------------|-----------------|--------------------------------------------------------------------------|------------------------|---|--|-------|---------|-----------|
|                          |                 | Annotation Cluster 55                                                    | Enrichment Score: 0.7  | G |  | Count | P_Value | Benjamini |
| <input type="checkbox"/> | PIR_SUPERFAMILY | PIRSF001950:small inducible chemokine, C/CC types                        | RT                     |   |  | 5     | 5.3E-2  | 1.0E0     |
| <input type="checkbox"/> | INTERPRO        | <a href="#">Small chemokine, interleukin-8-like</a>                      | RT                     |   |  | 7     | 8.3E-2  | 1.0E0     |
| <input type="checkbox"/> | INTERPRO        | <a href="#">Small chemokine, C-C</a>                                     | RT                     |   |  | 5     | 9.6E-2  | 1.0E0     |
| <input type="checkbox"/> | GOTERM_MF_ALL   | <a href="#">chemokine activity</a>                                       | RT                     |   |  | 7     | 1.1E-1  | 1.0E0     |
| <input type="checkbox"/> | GOTERM_MF_ALL   | <a href="#">chemokine receptor binding</a>                               | RT                     |   |  | 7     | 1.1E-1  | 1.0E0     |
| <input type="checkbox"/> | SMART           | <a href="#">SCY</a>                                                      | RT                     |   |  | 7     | 1.4E-1  | 9.4E-1    |
| <input type="checkbox"/> | SP_PIR_KEYWORDS | <a href="#">chemotaxis</a>                                               | RT                     |   |  | 8     | 1.5E-1  | 9.2E-1    |
| <input type="checkbox"/> | GOTERM_MF_ALL   | <a href="#">G-protein-coupled receptor binding</a>                       | RT                     |   |  | 8     | 2.5E-1  | 1.0E0     |
| <input type="checkbox"/> | GOTERM_BP_ALL   | <a href="#">locomotory behavior</a>                                      | RT                     |   |  | 19    | 3.9E-1  | 1.0E0     |
| <input type="checkbox"/> | BIOCARTA        | <a href="#">Pertussis toxin-insensitive CCR5 Signaling in Macrophage</a> | RT                     |   |  | 3     | 5.1E-1  | 1.0E0     |
| <input type="checkbox"/> | GOTERM_BP_ALL   | <a href="#">taxis</a>                                                    | RT                     |   |  | 10    | 5.4E-1  | 1.0E0     |
| <input type="checkbox"/> | GOTERM_BP_ALL   | <a href="#">chemotaxis</a>                                               | RT                     |   |  | 10    | 5.4E-1  | 1.0E0     |
| <input type="checkbox"/> | GOTERM_BP_ALL   | <a href="#">behavior</a>                                                 | RT                     |   |  | 26    | 5.8E-1  | 1.0E0     |
|                          |                 | Annotation Cluster 56                                                    | Enrichment Score: 0.69 | G |  | Count | P_Value | Benjamini |
| <input type="checkbox"/> | GOTERM_BP_ALL   | <a href="#">leukocyte homeostasis</a>                                    | RT                     |   |  | 5     | 1.8E-1  | 1.0E0     |
| <input type="checkbox"/> | GOTERM_BP_ALL   | <a href="#">homeostasis of number of cells</a>                           | RT                     |   |  | 5     | 2.1E-1  | 1.0E0     |
| <input type="checkbox"/> | GOTERM_BP_ALL   | <a href="#">lymphocyte homeostasis</a>                                   | RT                     |   |  | 4     | 2.3E-1  | 1.0E0     |
|                          |                 | Annotation Cluster 57                                                    | Enrichment Score: 0.69 | G |  | Count | P_Value | Benjamini |
| <input type="checkbox"/> | GOTERM_MF_ALL   | <a href="#">small conjugating protein ligase activity</a>                | RT                     |   |  | 16    | 8.1E-2  | 9.9E-1    |
| <input type="checkbox"/> | GOTERM_MF_ALL   | <a href="#">ubiquitin-protein ligase activity</a>                        | RT                     |   |  | 15    | 1.0E-1  | 9.9E-1    |
| <input type="checkbox"/> | GOTERM_MF_ALL   | <a href="#">ligase activity, forming carbon-nitrogen bonds</a>           | RT                     |   |  | 20    | 1.1E-1  | 1.0E0     |
| <input type="checkbox"/> | GOTERM_MF_ALL   | <a href="#">small protein conjugating enzyme activity</a>                | RT                     |   |  | 15    | 1.2E-1  | 1.0E0     |
| <input type="checkbox"/> | GOTERM_MF_ALL   | <a href="#">ligase activity</a>                                          | RT                     |   |  | 34    | 1.6E-1  | 1.0E0     |
| <input type="checkbox"/> | GOTERM_MF_ALL   | <a href="#">acid-amino acid ligase activity</a>                          | RT                     |   |  | 16    | 1.7E-1  | 1.0E0     |
| <input type="checkbox"/> | SMART           | <a href="#">UBCc</a>                                                     | RT                     |   |  | 7     | 2.7E-1  | 9.8E-1    |
| <input type="checkbox"/> | SP_PIR_KEYWORDS | <a href="#">ligase</a>                                                   | RT                     |   |  | 21    | 4.2E-1  | 1.0E0     |
| <input type="checkbox"/> | GOTERM_BP_ALL   | <a href="#">protein modification by small protein conjugation</a>        | RT                     |   |  | 6     | 5.9E-1  | 1.0E0     |
| <input type="checkbox"/> | GOTERM_BP_ALL   | <a href="#">protein ubiquitination</a>                                   | RT                     |   |  | 5     | 6.8E-1  | 1.0E0     |
|                          |                 | Annotation Cluster 58                                                    | Enrichment Score: 0.68 | G |  | Count | P_Value | Benjamini |
| <input type="checkbox"/> | GOTERM_CC_ALL   | <a href="#">chromosome, telomeric region</a>                             | RT                     |   |  | 5     | 5.9E-2  | 9.1E-1    |
| <input type="checkbox"/> | SP_PIR_KEYWORDS | <a href="#">telomere</a>                                                 | RT                     |   |  | 4     | 1.2E-1  | 9.0E-1    |
| <input type="checkbox"/> | GOTERM_BP_ALL   | <a href="#">telomere maintenance</a>                                     | RT                     |   |  | 3     | 5.3E-1  | 1.0E0     |
| <input type="checkbox"/> | GOTERM_BP_ALL   | <a href="#">telomere organization and biogenesis</a>                     | RT                     |   |  | 3     | 5.3E-1  | 1.0E0     |
|                          |                 | Annotation Cluster 59                                                    | Enrichment Score: 0.68 | G |  | Count | P_Value | Benjamini |
| <input type="checkbox"/> | GOTERM_BP_ALL   | <a href="#">rhythmic process</a>                                         | RT                     |   |  | 12    | 6.2E-2  | 9.5E-1    |
| <input type="checkbox"/> | GOTERM_BP_ALL   | <a href="#">development of primary sexual characteristics</a>            | RT                     |   |  | 10    | 8.6E-2  | 9.7E-1    |
| <input type="checkbox"/> | GOTERM_BP_ALL   | <a href="#">reproductive developmental process</a>                       | RT                     |   |  | 13    | 1.0E-1  | 9.8E-1    |
| <input type="checkbox"/> | GOTERM_BP_ALL   | <a href="#">gonad development</a>                                        | RT                     |   |  | 9     | 1.1E-1  | 9.8E-1    |
| <input type="checkbox"/> | GOTERM_BP_ALL   | <a href="#">sex differentiation</a>                                      | RT                     |   |  | 12    | 1.2E-1  | 9.9E-1    |
| <input type="checkbox"/> | GOTERM_BP_ALL   | <a href="#">female sex differentiation</a>                               | RT                     |   |  | 7     | 1.2E-1  | 9.9E-1    |
| <input type="checkbox"/> | GOTERM_BP_ALL   | <a href="#">development of primary female sexual characteristics</a>     | RT                     |   |  | 7     | 1.2E-1  | 9.9E-1    |
| <input type="checkbox"/> | GOTERM_BP_ALL   | <a href="#">reproductive structure development</a>                       | RT                     |   |  | 9     | 1.2E-1  | 9.9E-1    |
| <input type="checkbox"/> | GOTERM_BP_ALL   | <a href="#">menstrual cycle phase</a>                                    | RT                     |   |  | 6     | 1.4E-1  | 9.9E-1    |
| <input type="checkbox"/> | GOTERM_BP_ALL   | <a href="#">menstrual cycle process</a>                                  | RT                     |   |  | 6     | 1.5E-1  | 9.9E-1    |
| <input type="checkbox"/> | GOTERM_BP_ALL   | <a href="#">ovulation from ovarian follicle</a>                          | RT                     |   |  | 3     | 1.8E-1  | 1.0E0     |
| <input type="checkbox"/> | GOTERM_BP_ALL   | <a href="#">ovulation</a>                                                | RT                     |   |  | 3     | 2.1E-1  | 1.0E0     |



|                          |                |                                                                      |                    |  |       |         |           |
|--------------------------|----------------|----------------------------------------------------------------------|--------------------|--|-------|---------|-----------|
| <input type="checkbox"/> | GOTERM_BP_ALL  | <a href="#">female gonad development</a>                             | <a href="#">RT</a> |  | 6     | 2.2E-1  | 1.0E0     |
| <input type="checkbox"/> | GOTERM_BP_ALL  | <a href="#">menstrual cycle</a>                                      | <a href="#">RT</a> |  | 6     | 2.7E-1  | 1.0E0     |
| <input type="checkbox"/> | GOTERM_BP_ALL  | <a href="#">female gamete generation</a>                             | <a href="#">RT</a> |  | 5     | 2.8E-1  | 1.0E0     |
| <input type="checkbox"/> | GOTERM_BP_ALL  | <a href="#">ovarian follicle development</a>                         | <a href="#">RT</a> |  | 4     | 2.9E-1  | 1.0E0     |
| <input type="checkbox"/> | GOTERM_BP_ALL  | <a href="#">male sex differentiation</a>                             | <a href="#">RT</a> |  | 4     | 4.5E-1  | 1.0E0     |
| <input type="checkbox"/> | GOTERM_BP_ALL  | <a href="#">male gonad development</a>                               | <a href="#">RT</a> |  | 3     | 4.8E-1  | 1.0E0     |
| <input type="checkbox"/> | GOTERM_BP_ALL  | <a href="#">multicellular organism reproduction</a>                  | <a href="#">RT</a> |  | 7     | 5.8E-1  | 1.0E0     |
| <input type="checkbox"/> | GOTERM_BP_ALL  | <a href="#">reproductive process in a multicellular organism</a>     | <a href="#">RT</a> |  | 7     | 5.8E-1  | 1.0E0     |
| <input type="checkbox"/> | GOTERM_BP_ALL  | <a href="#">reproductive process</a>                                 | <a href="#">RT</a> |  | 19    | 5.9E-1  | 1.0E0     |
| <input type="checkbox"/> | GOTERM_BP_ALL  | <a href="#">development of primary male sexual characteristics</a>   | <a href="#">RT</a> |  | 3     | 6.2E-1  | 1.0E0     |
| Annotation Cluster 60    |                | Enrichment Score: 0.66                                               | <b>G</b>           |  | Count | P_Value | Benjamini |
| <input type="checkbox"/> | GOTERM_BP_ALL  | <a href="#">regulation of multicellular organism growth</a>          | <a href="#">RT</a> |  | 9     | 5.5E-2  | 9.4E-1    |
| <input type="checkbox"/> | GOTERM_BP_ALL  | <a href="#">multicellular organism growth</a>                        | <a href="#">RT</a> |  | 9     | 1.1E-1  | 9.8E-1    |
| <input type="checkbox"/> | GOTERM_BP_ALL  | <a href="#">negative regulation of multicellular organism growth</a> | <a href="#">RT</a> |  | 3     | 1.8E-1  | 1.0E0     |
| <input type="checkbox"/> | GOTERM_BP_ALL  | <a href="#">positive regulation of multicellular organism growth</a> | <a href="#">RT</a> |  | 3     | 5.8E-1  | 1.0E0     |
| <input type="checkbox"/> | GOTERM_BP_ALL  | <a href="#">positive regulation of growth</a>                        | <a href="#">RT</a> |  | 3     | 7.6E-1  | 1.0E0     |
| Annotation Cluster 61    |                | Enrichment Score: 0.66                                               | <b>G</b>           |  | Count | P_Value | Benjamini |
| <input type="checkbox"/> | UP_SEQ_FEATURE | domain:Death                                                         | <a href="#">RT</a> |  | 5     | 7.5E-2  | 1.0E0     |
| <input type="checkbox"/> | INTERPRO       | <a href="#">Death</a>                                                | <a href="#">RT</a> |  | 6     | 9.5E-2  | 1.0E0     |
| <input type="checkbox"/> | SMART          | <a href="#">DEATH</a>                                                | <a href="#">RT</a> |  | 6     | 1.7E-1  | 9.4E-1    |
| <input type="checkbox"/> | UP_SEQ_FEATURE | repeat:TNFR-Cys 2                                                    | <a href="#">RT</a> |  | 4     | 1.8E-1  | 1.0E0     |
| <input type="checkbox"/> | UP_SEQ_FEATURE | repeat:TNFR-Cys 1                                                    | <a href="#">RT</a> |  | 4     | 1.8E-1  | 1.0E0     |
| <input type="checkbox"/> | INTERPRO       | <a href="#">DEATH-like</a>                                           | <a href="#">RT</a> |  | 6     | 3.1E-1  | 1.0E0     |
| <input type="checkbox"/> | UP_SEQ_FEATURE | repeat:TNFR-Cys 3                                                    | <a href="#">RT</a> |  | 3     | 3.6E-1  | 1.0E0     |
| <input type="checkbox"/> | INTERPRO       | <a href="#">TNFR/CD27/30/40/95 cysteine-rich region</a>              | <a href="#">RT</a> |  | 4     | 4.5E-1  | 1.0E0     |
| <input type="checkbox"/> | SMART          | <a href="#">TNFR</a>                                                 | <a href="#">RT</a> |  | 4     | 5.5E-1  | 1.0E0     |
| Annotation Cluster 62    |                | Enrichment Score: 0.65                                               | <b>G</b>           |  | Count | P_Value | Benjamini |
| <input type="checkbox"/> | GOTERM_BP_ALL  | <a href="#">stress-activated protein kinase signaling pathway</a>    | <a href="#">RT</a> |  | 8     | 1.1E-1  | 9.9E-1    |
| <input type="checkbox"/> | GOTERM_BP_ALL  | <a href="#">MAPKKK cascade</a>                                       | <a href="#">RT</a> |  | 14    | 2.7E-1  | 1.0E0     |
| <input type="checkbox"/> | GOTERM_BP_ALL  | <a href="#">JNK cascade</a>                                          | <a href="#">RT</a> |  | 6     | 3.6E-1  | 1.0E0     |
| Annotation Cluster 63    |                | Enrichment Score: 0.65                                               | <b>G</b>           |  | Count | P_Value | Benjamini |
| <input type="checkbox"/> | GOTERM_BP_ALL  | <a href="#">immune system process</a>                                | <a href="#">RT</a> |  | 75    | 2.1E-2  | 7.6E-1    |
| <input type="checkbox"/> | GOTERM_BP_ALL  | <a href="#">leukocyte activation</a>                                 | <a href="#">RT</a> |  | 27    | 5.7E-2  | 9.4E-1    |
| <input type="checkbox"/> | GOTERM_BP_ALL  | <a href="#">cell activation</a>                                      | <a href="#">RT</a> |  | 28    | 7.0E-2  | 9.6E-1    |
| <input type="checkbox"/> | GOTERM_BP_ALL  | <a href="#">B cell activation</a>                                    | <a href="#">RT</a> |  | 13    | 7.5E-2  | 9.6E-1    |
| <input type="checkbox"/> | GOTERM_BP_ALL  | <a href="#">lymphocyte activation</a>                                | <a href="#">RT</a> |  | 23    | 1.5E-1  | 9.9E-1    |
| <input type="checkbox"/> | GOTERM_BP_ALL  | <a href="#">leukocyte differentiation</a>                            | <a href="#">RT</a> |  | 15    | 3.2E-1  | 1.0E0     |
| <input type="checkbox"/> | GOTERM_BP_ALL  | <a href="#">hemopoietic or lymphoid organ development</a>            | <a href="#">RT</a> |  | 24    | 3.9E-1  | 1.0E0     |
| <input type="checkbox"/> | GOTERM_BP_ALL  | <a href="#">immune system development</a>                            | <a href="#">RT</a> |  | 25    | 4.2E-1  | 1.0E0     |
| <input type="checkbox"/> | GOTERM_BP_ALL  | <a href="#">B cell differentiation</a>                               | <a href="#">RT</a> |  | 5     | 4.3E-1  | 1.0E0     |
| <input type="checkbox"/> | GOTERM_BP_ALL  | <a href="#">T cell activation</a>                                    | <a href="#">RT</a> |  | 13    | 4.4E-1  | 1.0E0     |
| <input type="checkbox"/> | GOTERM_BP_ALL  | <a href="#">hemopoiesis</a>                                          | <a href="#">RT</a> |  | 21    | 4.8E-1  | 1.0E0     |
| <input type="checkbox"/> | GOTERM_BP_ALL  | <a href="#">lymphocyte differentiation</a>                           | <a href="#">RT</a> |  | 10    | 5.1E-1  | 1.0E0     |
| <input type="checkbox"/> | GOTERM_BP_ALL  | <a href="#">myeloid cell differentiation</a>                         | <a href="#">RT</a> |  | 10    | 5.4E-1  | 1.0E0     |
| <input type="checkbox"/> | GOTERM_BP_ALL  | <a href="#">T cell differentiation</a>                               | <a href="#">RT</a> |  | 6     | 6.8E-1  | 1.0E0     |
| Annotation Cluster 64    |                | Enrichment Score: 0.65                                               | <b>G</b>           |  | Count | P_Value | Benjamini |
| <input type="checkbox"/> | UP_SEQ_FEATURE | domain:AGC-kinase C-terminal                                         | <a href="#">RT</a> |  | 7     | 1.4E-1  | 1.0E0     |

|                          |                       |                                                                           |                        |          |    |              |                |                  |
|--------------------------|-----------------------|---------------------------------------------------------------------------|------------------------|----------|----|--------------|----------------|------------------|
| <input type="checkbox"/> | INTERPRO              | <a href="#">Protein kinase, C-terminal</a>                                | <a href="#">RT</a>     |          | 7  | 2.3E-1       | 1.0E0          |                  |
| <input type="checkbox"/> | SMART                 | <a href="#">S_TK_X</a>                                                    | <a href="#">RT</a>     |          | 7  | 3.5E-1       | 9.9E-1         |                  |
|                          | Annotation Cluster 65 |                                                                           | Enrichment Score: 0.63 | <b>G</b> |    | <b>Count</b> | <b>P_Value</b> | <b>Benjamini</b> |
| <input type="checkbox"/> | GOTERM_CC_ALL         | <a href="#">viral capsid</a>                                              | <a href="#">RT</a>     |          | 4  | 2.1E-1       | 1.0E0          |                  |
| <input type="checkbox"/> | GOTERM_CC_ALL         | <a href="#">virion</a>                                                    | <a href="#">RT</a>     |          | 4  | 2.5E-1       | 1.0E0          |                  |
| <input type="checkbox"/> | GOTERM_CC_ALL         | <a href="#">virion part</a>                                               | <a href="#">RT</a>     |          | 4  | 2.5E-1       | 1.0E0          |                  |
|                          | Annotation Cluster 66 |                                                                           | Enrichment Score: 0.6  | <b>G</b> |    | <b>Count</b> | <b>P_Value</b> | <b>Benjamini</b> |
| <input type="checkbox"/> | GOTERM_BP_ALL         | <a href="#">detection of stimulus</a>                                     | <a href="#">RT</a>     |          | 10 | 6.9E-2       | 9.6E-1         |                  |
| <input type="checkbox"/> | GOTERM_BP_ALL         | <a href="#">detection of light stimulus</a>                               | <a href="#">RT</a>     |          | 5  | 1.3E-1       | 9.9E-1         |                  |
| <input type="checkbox"/> | GOTERM_BP_ALL         | <a href="#">detection of external stimulus</a>                            | <a href="#">RT</a>     |          | 8  | 1.3E-1       | 9.9E-1         |                  |
| <input type="checkbox"/> | GOTERM_BP_ALL         | <a href="#">detection of abiotic stimulus</a>                             | <a href="#">RT</a>     |          | 7  | 1.4E-1       | 9.9E-1         |                  |
| <input type="checkbox"/> | GOTERM_BP_ALL         | <a href="#">detection of stimulus during sensory perception</a>           | <a href="#">RT</a>     |          | 6  | 2.2E-1       | 1.0E0          |                  |
| <input type="checkbox"/> | GOTERM_BP_ALL         | <a href="#">detection of light stimulus during sensory perception</a>     | <a href="#">RT</a>     |          | 4  | 2.7E-1       | 1.0E0          |                  |
| <input type="checkbox"/> | GOTERM_BP_ALL         | <a href="#">detection of light stimulus during visual perception</a>      | <a href="#">RT</a>     |          | 4  | 2.7E-1       | 1.0E0          |                  |
| <input type="checkbox"/> | GOTERM_BP_ALL         | <a href="#">detection of visible light</a>                                | <a href="#">RT</a>     |          | 4  | 2.7E-1       | 1.0E0          |                  |
| <input type="checkbox"/> | GOTERM_BP_ALL         | <a href="#">visual perception</a>                                         | <a href="#">RT</a>     |          | 11 | 3.2E-1       | 1.0E0          |                  |
| <input type="checkbox"/> | GOTERM_BP_ALL         | <a href="#">sensory perception of light stimulus</a>                      | <a href="#">RT</a>     |          | 11 | 3.3E-1       | 1.0E0          |                  |
| <input type="checkbox"/> | GOTERM_BP_ALL         | <a href="#">response to radiation</a>                                     | <a href="#">RT</a>     |          | 10 | 3.7E-1       | 1.0E0          |                  |
| <input type="checkbox"/> | GOTERM_BP_ALL         | <a href="#">response to light stimulus</a>                                | <a href="#">RT</a>     |          | 8  | 4.0E-1       | 1.0E0          |                  |
| <input type="checkbox"/> | GOTERM_BP_ALL         | <a href="#">phototransduction</a>                                         | <a href="#">RT</a>     |          | 3  | 5.0E-1       | 1.0E0          |                  |
| <input type="checkbox"/> | GOTERM_BP_ALL         | <a href="#">response to abiotic stimulus</a>                              | <a href="#">RT</a>     |          | 14 | 6.2E-1       | 1.0E0          |                  |
|                          | Annotation Cluster 67 |                                                                           | Enrichment Score: 0.6  | <b>G</b> |    | <b>Count</b> | <b>P_Value</b> | <b>Benjamini</b> |
| <input type="checkbox"/> | GOTERM_BP_ALL         | <a href="#">regulation of apoptosis</a>                                   | <a href="#">RT</a>     |          | 46 | 8.8E-2       | 9.7E-1         |                  |
| <input type="checkbox"/> | GOTERM_BP_ALL         | <a href="#">regulation of programmed cell death</a>                       | <a href="#">RT</a>     |          | 46 | 1.0E-1       | 9.8E-1         |                  |
| <input type="checkbox"/> | GOTERM_BP_ALL         | <a href="#">induction of apoptosis</a>                                    | <a href="#">RT</a>     |          | 16 | 3.2E-1       | 1.0E0          |                  |
| <input type="checkbox"/> | GOTERM_BP_ALL         | <a href="#">induction of programmed cell death</a>                        | <a href="#">RT</a>     |          | 16 | 3.2E-1       | 1.0E0          |                  |
| <input type="checkbox"/> | GOTERM_BP_ALL         | <a href="#">positive regulation of apoptosis</a>                          | <a href="#">RT</a>     |          | 18 | 5.0E-1       | 1.0E0          |                  |
| <input type="checkbox"/> | GOTERM_BP_ALL         | <a href="#">positive regulation of programmed cell death</a>              | <a href="#">RT</a>     |          | 18 | 5.3E-1       | 1.0E0          |                  |
|                          | Annotation Cluster 68 |                                                                           | Enrichment Score: 0.6  | <b>G</b> |    | <b>Count</b> | <b>P_Value</b> | <b>Benjamini</b> |
| <input type="checkbox"/> | GOTERM_MF_ALL         | <a href="#">protein methyltransferase activity</a>                        | <a href="#">RT</a>     |          | 8  | 2.9E-2       | 9.1E-1         |                  |
| <input type="checkbox"/> | GOTERM_MF_ALL         | <a href="#">histone methyltransferase activity</a>                        | <a href="#">RT</a>     |          | 5  | 1.5E-1       | 1.0E0          |                  |
| <input type="checkbox"/> | GOTERM_MF_ALL         | <a href="#">lysine N-methyltransferase activity</a>                       | <a href="#">RT</a>     |          | 4  | 1.6E-1       | 1.0E0          |                  |
| <input type="checkbox"/> | GOTERM_MF_ALL         | <a href="#">protein-lysine N-methyltransferase activity</a>               | <a href="#">RT</a>     |          | 4  | 1.6E-1       | 1.0E0          |                  |
| <input type="checkbox"/> | GOTERM_MF_ALL         | <a href="#">histone-lysine N-methyltransferase activity</a>               | <a href="#">RT</a>     |          | 4  | 1.6E-1       | 1.0E0          |                  |
| <input type="checkbox"/> | UP_SEQ_FEATURE        | domain:SET                                                                | <a href="#">RT</a>     |          | 3  | 2.8E-1       | 1.0E0          |                  |
| <input type="checkbox"/> | GOTERM_MF_ALL         | <a href="#">S-adenosylmethionine-dependent methyltransferase activity</a> | <a href="#">RT</a>     |          | 8  | 3.5E-1       | 1.0E0          |                  |
| <input type="checkbox"/> | GOTERM_MF_ALL         | <a href="#">N-methyltransferase activity</a>                              | <a href="#">RT</a>     |          | 5  | 3.8E-1       | 1.0E0          |                  |
| <input type="checkbox"/> | INTERPRO              | <a href="#">SET</a>                                                       | <a href="#">RT</a>     |          | 5  | 3.9E-1       | 1.0E0          |                  |
| <input type="checkbox"/> | GOTERM_MF_ALL         | <a href="#">methyltransferase activity</a>                                | <a href="#">RT</a>     |          | 14 | 5.0E-1       | 1.0E0          |                  |
| <input type="checkbox"/> | SMART                 | <a href="#">SET</a>                                                       | <a href="#">RT</a>     |          | 5  | 5.0E-1       | 1.0E0          |                  |
| <input type="checkbox"/> | SP_PIR_KEYWORDS       | <a href="#">methyltransferase</a>                                         | <a href="#">RT</a>     |          | 10 | 5.1E-1       | 1.0E0          |                  |
| <input type="checkbox"/> | GOTERM_MF_ALL         | <a href="#">transferase activity, transferring one-carbon groups</a>      | <a href="#">RT</a>     |          | 14 | 5.3E-1       | 1.0E0          |                  |
|                          | Annotation Cluster 69 |                                                                           | Enrichment Score: 0.59 | <b>G</b> |    | <b>Count</b> | <b>P_Value</b> | <b>Benjamini</b> |
| <input type="checkbox"/> | GOTERM_BP_ALL         | <a href="#">positive regulation of MAP kinase activity</a>                | <a href="#">RT</a>     |          | 8  | 6.8E-2       | 9.6E-1         |                  |
| <input type="checkbox"/> | GOTERM_BP_ALL         | <a href="#">positive regulation of transferase activity</a>               | <a href="#">RT</a>     |          | 15 | 8.6E-2       | 9.7E-1         |                  |
| <input type="checkbox"/> | GOTERM_BP_ALL         | <a href="#">regulation of a molecular function</a>                        | <a href="#">RT</a>     |          | 40 | 1.4E-1       | 9.9E-1         |                  |
| <input type="checkbox"/> | GOTERM_BP_ALL         | <a href="#">positive regulation of protein kinase activity</a>            | <a href="#">RT</a>     |          | 13 | 1.6E-1       | 9.9E-1         |                  |

|                          |                 |                                                              |                    |  |       |         |           |
|--------------------------|-----------------|--------------------------------------------------------------|--------------------|--|-------|---------|-----------|
| <input type="checkbox"/> | GOTERM_BP_ALL   | <a href="#">positive regulation of kinase activity</a>       | <a href="#">RT</a> |  | 13    | 2.0E-1  | 1.0E0     |
| <input type="checkbox"/> | GOTERM_BP_ALL   | <a href="#">activation of MAPK activity</a>                  | <a href="#">RT</a> |  | 6     | 2.1E-1  | 1.0E0     |
| <input type="checkbox"/> | GOTERM_BP_ALL   | <a href="#">MAPKKK cascade</a>                               | <a href="#">RT</a> |  | 14    | 2.7E-1  | 1.0E0     |
| <input type="checkbox"/> | GOTERM_BP_ALL   | <a href="#">positive regulation of JNK activity</a>          | <a href="#">RT</a> |  | 3     | 2.7E-1  | 1.0E0     |
| <input type="checkbox"/> | GOTERM_BP_ALL   | <a href="#">regulation of transferase activity</a>           | <a href="#">RT</a> |  | 18    | 2.8E-1  | 1.0E0     |
| <input type="checkbox"/> | GOTERM_BP_ALL   | <a href="#">positive regulation of catalytic activity</a>    | <a href="#">RT</a> |  | 18    | 3.0E-1  | 1.0E0     |
| <input type="checkbox"/> | GOTERM_BP_ALL   | <a href="#">regulation of MAP kinase activity</a>            | <a href="#">RT</a> |  | 8     | 3.3E-1  | 1.0E0     |
| <input type="checkbox"/> | GOTERM_BP_ALL   | <a href="#">regulation of JNK activity</a>                   | <a href="#">RT</a> |  | 3     | 3.9E-1  | 1.0E0     |
| <input type="checkbox"/> | GOTERM_BP_ALL   | <a href="#">regulation of catalytic activity</a>             | <a href="#">RT</a> |  | 31    | 4.2E-1  | 1.0E0     |
| <input type="checkbox"/> | GOTERM_BP_ALL   | <a href="#">regulation of kinase activity</a>                | <a href="#">RT</a> |  | 16    | 4.3E-1  | 1.0E0     |
| <input type="checkbox"/> | GOTERM_BP_ALL   | <a href="#">regulation of protein kinase activity</a>        | <a href="#">RT</a> |  | 15    | 4.8E-1  | 1.0E0     |
| <input type="checkbox"/> | GOTERM_BP_ALL   | <a href="#">apoptotic program</a>                            | <a href="#">RT</a> |  | 3     | 9.6E-1  | 1.0E0     |
| Annotation Cluster 70    |                 | Enrichment Score: 0.59                                       | <b>G</b>           |  | Count | P_Value | Benjamini |
| <input type="checkbox"/> | INTERPRO        | <a href="#">Nuclear receptor ROR</a>                         | <a href="#">RT</a> |  | 4     | 7.6E-3  | 8.2E-1    |
| <input type="checkbox"/> | GOTERM_BP_ALL   | <a href="#">regulation of macrophage activation</a>          | <a href="#">RT</a> |  | 3     | 7.6E-2  | 9.6E-1    |
| <input type="checkbox"/> | SP_PIR_KEYWORDS | <a href="#">transcription factor</a>                         | <a href="#">RT</a> |  | 8     | 8.1E-2  | 8.4E-1    |
| <input type="checkbox"/> | GOTERM_BP_ALL   | <a href="#">cGMP metabolic process</a>                       | <a href="#">RT</a> |  | 4     | 1.1E-1  | 9.8E-1    |
| <input type="checkbox"/> | GOTERM_BP_ALL   | <a href="#">macrophage activation</a>                        | <a href="#">RT</a> |  | 3     | 1.8E-1  | 1.0E0     |
| <input type="checkbox"/> | GOTERM_BP_ALL   | <a href="#">cerebellar Purkinje cell differentiation</a>     | <a href="#">RT</a> |  | 3     | 2.1E-1  | 1.0E0     |
| <input type="checkbox"/> | GOTERM_BP_ALL   | <a href="#">cerebellar Purkinje cell layer formation</a>     | <a href="#">RT</a> |  | 3     | 2.1E-1  | 1.0E0     |
| <input type="checkbox"/> | GOTERM_BP_ALL   | <a href="#">cerebellar Purkinje cell layer morphogenesis</a> | <a href="#">RT</a> |  | 3     | 2.1E-1  | 1.0E0     |
| <input type="checkbox"/> | GOTERM_BP_ALL   | <a href="#">cerebellar cortex formation</a>                  | <a href="#">RT</a> |  | 3     | 2.4E-1  | 1.0E0     |
| <input type="checkbox"/> | GOTERM_BP_ALL   | <a href="#">cell differentiation in hindbrain</a>            | <a href="#">RT</a> |  | 3     | 2.4E-1  | 1.0E0     |
| <input type="checkbox"/> | GOTERM_BP_ALL   | <a href="#">myeloid leukocyte activation</a>                 | <a href="#">RT</a> |  | 5     | 2.6E-1  | 1.0E0     |
| <input type="checkbox"/> | GOTERM_BP_ALL   | <a href="#">cerebellar Purkinje cell layer development</a>   | <a href="#">RT</a> |  | 3     | 3.0E-1  | 1.0E0     |
| <input type="checkbox"/> | GOTERM_BP_ALL   | <a href="#">cerebellar cortex morphogenesis</a>              | <a href="#">RT</a> |  | 3     | 3.3E-1  | 1.0E0     |
| <input type="checkbox"/> | GOTERM_BP_ALL   | <a href="#">cyclic nucleotide metabolic process</a>          | <a href="#">RT</a> |  | 5     | 3.4E-1  | 1.0E0     |
| <input type="checkbox"/> | GOTERM_BP_ALL   | <a href="#">cerebellum morphogenesis</a>                     | <a href="#">RT</a> |  | 3     | 3.6E-1  | 1.0E0     |
| <input type="checkbox"/> | SP_PIR_KEYWORDS | <a href="#">disease mutation</a>                             | <a href="#">RT</a> |  | 8     | 3.9E-1  | 1.0E0     |
| <input type="checkbox"/> | GOTERM_BP_ALL   | <a href="#">hindbrain morphogenesis</a>                      | <a href="#">RT</a> |  | 3     | 3.9E-1  | 1.0E0     |
| <input type="checkbox"/> | GOTERM_BP_ALL   | <a href="#">cerebellar cortex development</a>                | <a href="#">RT</a> |  | 3     | 4.2E-1  | 1.0E0     |
| <input type="checkbox"/> | GOTERM_BP_ALL   | <a href="#">metencephalon development</a>                    | <a href="#">RT</a> |  | 3     | 5.3E-1  | 1.0E0     |
| <input type="checkbox"/> | GOTERM_BP_ALL   | <a href="#">cerebellum development</a>                       | <a href="#">RT</a> |  | 3     | 5.3E-1  | 1.0E0     |
| <input type="checkbox"/> | GOTERM_BP_ALL   | <a href="#">nitric oxide metabolic process</a>               | <a href="#">RT</a> |  | 3     | 5.8E-1  | 1.0E0     |
| <input type="checkbox"/> | GOTERM_BP_ALL   | <a href="#">nitric oxide biosynthetic process</a>            | <a href="#">RT</a> |  | 3     | 5.8E-1  | 1.0E0     |
| <input type="checkbox"/> | GOTERM_BP_ALL   | <a href="#">hindbrain development</a>                        | <a href="#">RT</a> |  | 4     | 6.4E-1  | 1.0E0     |
| <input type="checkbox"/> | GOTERM_BP_ALL   | <a href="#">nitrogen compound biosynthetic process</a>       | <a href="#">RT</a> |  | 4     | 9.9E-1  | 1.0E0     |
| Annotation Cluster 71    |                 | Enrichment Score: 0.59                                       | <b>G</b>           |  | Count | P_Value | Benjamini |
| <input type="checkbox"/> | GOTERM_BP_ALL   | <a href="#">membrane lipid metabolic process</a>             | <a href="#">RT</a> |  | 20    | 1.0E-1  | 9.8E-1    |
| <input type="checkbox"/> | GOTERM_BP_ALL   | <a href="#">cellular lipid metabolic process</a>             | <a href="#">RT</a> |  | 49    | 2.5E-1  | 1.0E0     |
| <input type="checkbox"/> | GOTERM_BP_ALL   | <a href="#">lipid metabolic process</a>                      | <a href="#">RT</a> |  | 55    | 3.2E-1  | 1.0E0     |
| <input type="checkbox"/> | GOTERM_BP_ALL   | <a href="#">lipid biosynthetic process</a>                   | <a href="#">RT</a> |  | 21    | 5.3E-1  | 1.0E0     |
| Annotation Cluster 72    |                 | Enrichment Score: 0.58                                       | <b>G</b>           |  | Count | P_Value | Benjamini |
| <input type="checkbox"/> | SP_PIR_KEYWORDS | <a href="#">Nucleotidyltransferase</a>                       | <a href="#">RT</a> |  | 9     | 1.7E-1  | 9.4E-1    |
| <input type="checkbox"/> | SP_PIR_KEYWORDS | <a href="#">DNA-directed DNA polymerase</a>                  | <a href="#">RT</a> |  | 4     | 1.9E-1  | 9.5E-1    |
| <input type="checkbox"/> | KEGG_PATHWAY    | <a href="#">DNA polymerase</a>                               | <a href="#">RT</a> |  | 4     | 2.6E-1  | 8.7E-1    |
| <input type="checkbox"/> | GOTERM_MF_ALL   | <a href="#">nucleotidyltransferase activity</a>              | <a href="#">RT</a> |  | 12    | 3.0E-1  | 1.0E0     |
| <input type="checkbox"/> | SP_PIR_KEYWORDS | <a href="#">dna replication</a>                              | <a href="#">RT</a> |  | 8     | 3.3E-1  | 9.9E-1    |
| <input type="checkbox"/> | GOTERM_MF_ALL   | <a href="#">DNA-directed DNA polymerase activity</a>         | <a href="#">RT</a> |  | 4     | 4.0E-1  | 1.0E0     |

| Annotation Cluster 73    |                 | Enrichment Score: 0.58                                                 | G  |    | Count | P_Value | Benjamini |
|--------------------------|-----------------|------------------------------------------------------------------------|----|---------------------------------------------------------------------------------------|-------|---------|-----------|
| <input type="checkbox"/> | GOTERM_BP_ALL   | <a href="#">spermine catabolic process</a>                             | RT |      | 3     | 1.8E-2  | 7.3E-1    |
| <input type="checkbox"/> | GOTERM_BP_ALL   | <a href="#">polyamine catabolic process</a>                            | RT |      | 3     | 5.3E-2  | 9.4E-1    |
| <input type="checkbox"/> | GOTERM_BP_ALL   | <a href="#">spermine metabolic process</a>                             | RT |      | 3     | 1.0E-1  | 9.8E-1    |
| <input type="checkbox"/> | GOTERM_BP_ALL   | <a href="#">amino acid derivative catabolic process</a>                | RT |      | 4     | 1.5E-1  | 9.9E-1    |
| <input type="checkbox"/> | GOTERM_BP_ALL   | <a href="#">biogenic amine catabolic process</a>                       | RT |      | 3     | 3.3E-1  | 1.0E0     |
| <input type="checkbox"/> | GOTERM_BP_ALL   | <a href="#">polyamine metabolic process</a>                            | RT |      | 3     | 3.9E-1  | 1.0E0     |
| <input type="checkbox"/> | GOTERM_BP_ALL   | <a href="#">biogenic amine metabolic process</a>                       | RT |      | 4     | 9.5E-1  | 1.0E0     |
| <input type="checkbox"/> | GOTERM_BP_ALL   | <a href="#">amine catabolic process</a>                                | RT |      | 3     | 9.6E-1  | 1.0E0     |
| <input type="checkbox"/> | GOTERM_BP_ALL   | <a href="#">nitrogen compound catabolic process</a>                    | RT |      | 3     | 9.6E-1  | 1.0E0     |
| <input type="checkbox"/> | GOTERM_BP_ALL   | <a href="#">amino acid derivative metabolic process</a>                | RT |      | 4     | 9.8E-1  | 1.0E0     |
| Annotation Cluster 74    |                 | Enrichment Score: 0.58                                                 | G  |    | Count | P_Value | Benjamini |
| <input type="checkbox"/> | GOTERM_CC_ALL   | <a href="#">myelin sheath</a>                                          | RT |      | 3     | 4.9E-2  | 8.8E-1    |
| <input type="checkbox"/> | GOTERM_BP_ALL   | <a href="#">myelination</a>                                            | RT |      | 5     | 2.3E-1  | 1.0E0     |
| <input type="checkbox"/> | GOTERM_BP_ALL   | <a href="#">ensheathment of neurons</a>                                | RT |      | 5     | 2.6E-1  | 1.0E0     |
| <input type="checkbox"/> | GOTERM_BP_ALL   | <a href="#">axon ensheathment</a>                                      | RT |      | 5     | 2.6E-1  | 1.0E0     |
| <input type="checkbox"/> | GOTERM_BP_ALL   | <a href="#">regulation of action potential</a>                         | RT |      | 5     | 4.6E-1  | 1.0E0     |
| <input type="checkbox"/> | GOTERM_BP_ALL   | <a href="#">transmission of nerve impulse</a>                          | RT |      | 15    | 9.5E-1  | 1.0E0     |
| Annotation Cluster 75    |                 | Enrichment Score: 0.58                                                 | G  |    | Count | P_Value | Benjamini |
| <input type="checkbox"/> | INTERPRO        | <a href="#">Protein kinase C, phorbol ester/diacylglycerol binding</a> | RT |      | 9     | 9.4E-2  | 1.0E0     |
| <input type="checkbox"/> | SMART           | <a href="#">C1</a>                                                     | RT |      | 9     | 1.7E-1  | 9.5E-1    |
| <input type="checkbox"/> | UP_SEQ_FEATURE  | zinc finger region:Phorbol-ester/DAG-type 1                            | RT |      | 3     | 2.2E-1  | 1.0E0     |
| <input type="checkbox"/> | UP_SEQ_FEATURE  | zinc finger region:Phorbol-ester/DAG-type 2                            | RT |      | 3     | 2.2E-1  | 1.0E0     |
| <input type="checkbox"/> | GOTERM_MF_ALL   | <a href="#">protein kinase C activity</a>                              | RT |      | 3     | 3.3E-1  | 1.0E0     |
| <input type="checkbox"/> | GOTERM_MF_ALL   | <a href="#">diacylglycerol binding</a>                                 | RT |     | 6     | 3.8E-1  | 1.0E0     |
| <input type="checkbox"/> | GOTERM_MF_ALL   | <a href="#">phorbol ester receptor activity</a>                        | RT |    | 3     | 3.9E-1  | 1.0E0     |
| <input type="checkbox"/> | SP_PIR_KEYWORDS | <a href="#">Phorbol-ester binding</a>                                  | RT |    | 4     | 6.4E-1  | 1.0E0     |
| Annotation Cluster 76    |                 | Enrichment Score: 0.56                                                 | G  |  | Count | P_Value | Benjamini |
| <input type="checkbox"/> | GOTERM_BP_ALL   | <a href="#">odontogenesis of dentine-containing teeth</a>              | RT |    | 8     | 2.7E-2  | 8.3E-1    |
| <input type="checkbox"/> | GOTERM_BP_ALL   | <a href="#">odontogenesis</a>                                          | RT |    | 8     | 4.5E-2  | 9.2E-1    |
| <input type="checkbox"/> | GOTERM_BP_ALL   | <a href="#">kidney development</a>                                     | RT |    | 6     | 7.2E-1  | 1.0E0     |
| <input type="checkbox"/> | GOTERM_BP_ALL   | <a href="#">metanephros development</a>                                | RT |    | 4     | 7.6E-1  | 1.0E0     |
| <input type="checkbox"/> | GOTERM_BP_ALL   | <a href="#">urogenital system development</a>                          | RT |    | 6     | 7.9E-1  | 1.0E0     |
| <input type="checkbox"/> | GOTERM_BP_ALL   | <a href="#">ureteric bud development</a>                               | RT |    | 3     | 8.0E-1  | 1.0E0     |
| Annotation Cluster 77    |                 | Enrichment Score: 0.56                                                 | G  |  | Count | P_Value | Benjamini |
| <input type="checkbox"/> | GOTERM_CC_ALL   | <a href="#">microbody membrane</a>                                     | RT |    | 4     | 1.7E-1  | 1.0E0     |
| <input type="checkbox"/> | GOTERM_CC_ALL   | <a href="#">peroxisomal membrane</a>                                   | RT |    | 4     | 1.7E-1  | 1.0E0     |
| <input type="checkbox"/> | GOTERM_CC_ALL   | <a href="#">microbody part</a>                                         | RT |    | 4     | 2.1E-1  | 1.0E0     |
| <input type="checkbox"/> | GOTERM_CC_ALL   | <a href="#">peroxisomal part</a>                                       | RT |    | 4     | 2.1E-1  | 1.0E0     |
| <input type="checkbox"/> | SP_PIR_KEYWORDS | <a href="#">peroxisome</a>                                             | RT |    | 8     | 4.0E-1  | 1.0E0     |
| <input type="checkbox"/> | GOTERM_CC_ALL   | <a href="#">microbody</a>                                              | RT |    | 8     | 5.0E-1  | 1.0E0     |
| <input type="checkbox"/> | GOTERM_CC_ALL   | <a href="#">peroxisome</a>                                             | RT |    | 8     | 5.0E-1  | 1.0E0     |
| Annotation Cluster 78    |                 | Enrichment Score: 0.55                                                 | G  |  | Count | P_Value | Benjamini |
| <input type="checkbox"/> | GOTERM_BP_ALL   | <a href="#">lysosomal transport</a>                                    | RT |    | 3     | 1.8E-1  | 1.0E0     |
| <input type="checkbox"/> | GOTERM_BP_ALL   | <a href="#">vacuolar transport</a>                                     | RT |    | 4     | 1.9E-1  | 1.0E0     |
| <input type="checkbox"/> | GOTERM_BP_ALL   | <a href="#">endosome transport</a>                                     | RT |    | 3     | 6.4E-1  | 1.0E0     |
| Annotation Cluster 79    |                 | Enrichment Score: 0.55                                                 | G  |  | Count | P_Value | Benjamini |
| <input type="checkbox"/> | KEGG_PATHWAY    | <a href="#">Prostate cancer</a>                                        | RT |    | 13    | 3.5E-2  | 4.7E-1    |
| <input type="checkbox"/> | KEGG_PATHWAY    | <a href="#">Renal cell carcinoma</a>                                   | RT |    | 11    | 4.2E-2  | 5.0E-1    |

|                          |                 |                                                                                        |                    |                                                                                       |       |         |           |
|--------------------------|-----------------|----------------------------------------------------------------------------------------|--------------------|---------------------------------------------------------------------------------------|-------|---------|-----------|
| <input type="checkbox"/> | KEGG_PATHWAY    | <a href="#">mTOR signaling pathway</a>                                                 | <a href="#">RT</a> |                                                                                       | 8     | 9.5E-2  | 7.1E-1    |
| <input type="checkbox"/> | KEGG_PATHWAY    | <a href="#">Melanoma</a>                                                               | <a href="#">RT</a> |                                                                                       | 9     | 1.5E-1  | 8.4E-1    |
| <input type="checkbox"/> | KEGG_PATHWAY    | <a href="#">Insulin signaling pathway</a>                                              | <a href="#">RT</a> |                                                                                       | 14    | 1.8E-1  | 8.6E-1    |
| <input type="checkbox"/> | GOTERM_MF_ALL   | <a href="#">phosphoinositide 3-kinase activity</a>                                     | <a href="#">RT</a> |                                                                                       | 3     | 1.8E-1  | 1.0E0     |
| <input type="checkbox"/> | GOTERM_MF_ALL   | <a href="#">1-phosphatidylinositol-3-kinase activity</a>                               | <a href="#">RT</a> |                                                                                       | 3     | 1.8E-1  | 1.0E0     |
| <input type="checkbox"/> | KEGG_PATHWAY    | <a href="#">Chronic myeloid leukemia</a>                                               | <a href="#">RT</a> |                                                                                       | 9     | 2.0E-1  | 8.6E-1    |
| <input type="checkbox"/> | GOTERM_CC_ALL   | <a href="#">phosphoinositide 3-kinase complex</a>                                      | <a href="#">RT</a> |                                                                                       | 3     | 2.0E-1  | 1.0E0     |
| <input type="checkbox"/> | KEGG_PATHWAY    | <a href="#">Non-small cell lung cancer</a>                                             | <a href="#">RT</a> |                                                                                       | 7     | 2.2E-1  | 8.8E-1    |
| <input type="checkbox"/> | KEGG_PATHWAY    | <a href="#">B cell receptor signaling pathway</a>                                      | <a href="#">RT</a> |                                                                                       | 8     | 2.3E-1  | 8.7E-1    |
| <input type="checkbox"/> | KEGG_PATHWAY    | <a href="#">Small cell lung cancer</a>                                                 | <a href="#">RT</a> |                                                                                       | 10    | 2.4E-1  | 8.7E-1    |
| <input type="checkbox"/> | KEGG_PATHWAY    | <a href="#">Type II diabetes mellitus</a>                                              | <a href="#">RT</a> |                                                                                       | 6     | 2.7E-1  | 8.9E-1    |
| <input type="checkbox"/> | KEGG_PATHWAY    | <a href="#">Glioma</a>                                                                 | <a href="#">RT</a> |                                                                                       | 7     | 2.9E-1  | 8.9E-1    |
| <input type="checkbox"/> | KEGG_PATHWAY    | <a href="#">Fc epsilon RI signaling pathway</a>                                        | <a href="#">RT</a> |                                                                                       | 8     | 3.1E-1  | 8.9E-1    |
| <input type="checkbox"/> | KEGG_PATHWAY    | <a href="#">Endometrial cancer</a>                                                     | <a href="#">RT</a> |                                                                                       | 6     | 3.4E-1  | 9.0E-1    |
| <input type="checkbox"/> | KEGG_PATHWAY    | <a href="#">Focal adhesion</a>                                                         | <a href="#">RT</a> |                                                                                       | 17    | 3.8E-1  | 9.1E-1    |
| <input type="checkbox"/> | KEGG_PATHWAY    | <a href="#">ErbB signaling pathway</a>                                                 | <a href="#">RT</a> |                                                                                       | 8     | 4.4E-1  | 9.3E-1    |
| <input type="checkbox"/> | KEGG_PATHWAY    | <a href="#">T cell receptor signaling pathway</a>                                      | <a href="#">RT</a> |                                                                                       | 9     | 4.4E-1  | 9.3E-1    |
| <input type="checkbox"/> | KEGG_PATHWAY    | <a href="#">Acute myeloid leukemia</a>                                                 | <a href="#">RT</a> |                                                                                       | 6     | 4.6E-1  | 9.4E-1    |
| <input type="checkbox"/> | GOTERM_MF_ALL   | <a href="#">inositol or phosphatidylinositol kinase activity</a>                       | <a href="#">RT</a> |                                                                                       | 4     | 4.8E-1  | 1.0E0     |
| <input type="checkbox"/> | GOTERM_MF_ALL   | <a href="#">lipid kinase activity</a>                                                  | <a href="#">RT</a> |                                                                                       | 3     | 5.2E-1  | 1.0E0     |
| <input type="checkbox"/> | KEGG_PATHWAY    | <a href="#">Phosphatidylinositol signaling system</a>                                  | <a href="#">RT</a> |                                                                                       | 6     | 5.5E-1  | 9.7E-1    |
| <input type="checkbox"/> | KEGG_PATHWAY    | <a href="#">Colorectal cancer</a>                                                      | <a href="#">RT</a> |                                                                                       | 7     | 5.7E-1  | 9.7E-1    |
| <input type="checkbox"/> | KEGG_PATHWAY    | <a href="#">Leukocyte transendothelial migration</a>                                   | <a href="#">RT</a> |                                                                                       | 9     | 5.8E-1  | 9.7E-1    |
| <input type="checkbox"/> | KEGG_PATHWAY    | <a href="#">Pancreatic cancer</a>                                                      | <a href="#">RT</a> |                                                                                       | 6     | 6.4E-1  | 9.8E-1    |
| <input type="checkbox"/> | KEGG_PATHWAY    | <a href="#">VEGF signaling pathway</a>                                                 | <a href="#">RT</a> |                                                                                       | 5     | 8.2E-1  | 9.9E-1    |
| <input type="checkbox"/> | GOTERM_CC_ALL   | <a href="#">cytosolic part</a>                                                         | <a href="#">RT</a> |                                                                                       | 5     | 9.6E-1  | 1.0E0     |
| Annotation Cluster 80    |                 | Enrichment Score: 0.54                                                                 | <b>G</b>           |  | Count | P_Value | Benjamini |
| <input type="checkbox"/> | GOTERM_MF_ALL   | <a href="#">N-acetyltransferase activity</a>                                           | <a href="#">RT</a> |                                                                                       | 8     | 1.3E-1  | 1.0E0     |
| <input type="checkbox"/> | GOTERM_MF_ALL   | <a href="#">acetyltransferase activity</a>                                             | <a href="#">RT</a> |                                                                                       | 9     | 1.6E-1  | 1.0E0     |
| <input type="checkbox"/> | GOTERM_MF_ALL   | <a href="#">N-acyltransferase activity</a>                                             | <a href="#">RT</a> |                                                                                       | 8     | 2.3E-1  | 1.0E0     |
| <input type="checkbox"/> | GOTERM_MF_ALL   | <a href="#">acyltransferase activity</a>                                               | <a href="#">RT</a> |                                                                                       | 16    | 3.8E-1  | 1.0E0     |
| <input type="checkbox"/> | GOTERM_MF_ALL   | <a href="#">transferase activity, transferring groups other than amino-acyl groups</a> | <a href="#">RT</a> |                                                                                       | 16    | 4.0E-1  | 1.0E0     |
| <input type="checkbox"/> | SP_PIR_KEYWORDS | <a href="#">acyltransferase</a>                                                        | <a href="#">RT</a> |                                                                                       | 12    | 4.6E-1  | 1.0E0     |
| <input type="checkbox"/> | GOTERM_MF_ALL   | <a href="#">transferase activity, transferring acyl groups</a>                         | <a href="#">RT</a> |                                                                                       | 16    | 4.7E-1  | 1.0E0     |
| Annotation Cluster 81    |                 | Enrichment Score: 0.54                                                                 | <b>G</b>           |  | Count | P_Value | Benjamini |
| <input type="checkbox"/> | INTERPRO        | <a href="#">Basic-leucine zipper (bZIP) transcription factor</a>                       | <a href="#">RT</a> |                                                                                       | 7     | 1.8E-1  | 1.0E0     |
| <input type="checkbox"/> | UP_SEQ_FEATURE  | domain:Leucine-zipper                                                                  | <a href="#">RT</a> |                                                                                       | 10    | 1.9E-1  | 1.0E0     |
| <input type="checkbox"/> | SMART           | <a href="#">BRLZ</a>                                                                   | <a href="#">RT</a> |                                                                                       | 7     | 3.3E-1  | 9.9E-1    |
| <input type="checkbox"/> | UP_SEQ_FEATURE  | DNA-binding region:Basic motif                                                         | <a href="#">RT</a> |                                                                                       | 9     | 5.9E-1  | 1.0E0     |
| Annotation Cluster 82    |                 | Enrichment Score: 0.54                                                                 | <b>G</b>           |  | Count | P_Value | Benjamini |
| <input type="checkbox"/> | UP_SEQ_FEATURE  | zinc finger region:B box-type                                                          | <a href="#">RT</a> |                                                                                       | 6     | 4.5E-2  | 1.0E0     |
| <input type="checkbox"/> | INTERPRO        | <a href="#">Zinc finger, B-box</a>                                                     | <a href="#">RT</a> |                                                                                       | 9     | 6.3E-2  | 1.0E0     |
| <input type="checkbox"/> | INTERPRO        | <a href="#">B-box, C-terminal</a>                                                      | <a href="#">RT</a> |                                                                                       | 4     | 1.0E-1  | 1.0E0     |
| <input type="checkbox"/> | SMART           | <a href="#">BBOX</a>                                                                   | <a href="#">RT</a> |                                                                                       | 9     | 1.2E-1  | 9.2E-1    |
| <input type="checkbox"/> | SMART           | <a href="#">BBC</a>                                                                    | <a href="#">RT</a> |                                                                                       | 4     | 3.6E-1  | 9.9E-1    |
| <input type="checkbox"/> | UP_SEQ_FEATURE  | domain:B30.2/SPRY                                                                      | <a href="#">RT</a> |                                                                                       | 3     | 5.8E-1  | 1.0E0     |
| <input type="checkbox"/> | INTERPRO        | <a href="#">Butyrophilin-like</a>                                                      | <a href="#">RT</a> |                                                                                       | 4     | 6.2E-1  | 1.0E0     |
| <input type="checkbox"/> | PIR_SUPERFAMILY | PIRSF001733:rfp transforming protein                                                   | <a href="#">RT</a> |                                                                                       | 3     | 6.6E-1  | 1.0E0     |

| <input type="checkbox"/> | INTERPRO              | <a href="#">SP1a/Ryanodine receptor SPRY</a>                       | <a href="#">RT</a> |  |  |  |  | 5     | 6.9E-1  | 1.0E0     |
|--------------------------|-----------------------|--------------------------------------------------------------------|--------------------|--|--|--|--|-------|---------|-----------|
| <input type="checkbox"/> | INTERPRO              | <a href="#">B302, (SPRY)-like</a>                                  | <a href="#">RT</a> |  |  |  |  | 5     | 7.1E-1  | 1.0E0     |
| <input type="checkbox"/> | SMART                 | <a href="#">SPRY</a>                                               | <a href="#">RT</a> |  |  |  |  | 5     | 8.4E-1  | 1.0E0     |
|                          | Annotation Cluster 83 | Enrichment Score: 0.52                                             | <b>G</b>           |  |  |  |  | Count | P_Value | Benjamini |
| <input type="checkbox"/> | INTERPRO              | <a href="#">Metal-dependent phosphohydrolase, HD region</a>        | <a href="#">RT</a> |  |  |  |  | 4     | 2.2E-1  | 1.0E0     |
| <input type="checkbox"/> | GOTERM_MF_ALL         | <a href="#">3',5'-cyclic-nucleotide phosphodiesterase activity</a> | <a href="#">RT</a> |  |  |  |  | 4     | 2.4E-1  | 1.0E0     |
| <input type="checkbox"/> | SMART                 | <a href="#">HDc</a>                                                | <a href="#">RT</a> |  |  |  |  | 4     | 2.9E-1  | 9.8E-1    |
| <input type="checkbox"/> | GOTERM_MF_ALL         | <a href="#">cyclic-nucleotide phosphodiesterase activity</a>       | <a href="#">RT</a> |  |  |  |  | 4     | 2.9E-1  | 1.0E0     |
| <input type="checkbox"/> | INTERPRO              | <a href="#">3'5'-cyclic nucleotide phosphodiesterase</a>           | <a href="#">RT</a> |  |  |  |  | 3     | 4.1E-1  | 1.0E0     |
| <input type="checkbox"/> | GOTERM_MF_ALL         | <a href="#">phosphoric diester hydrolase activity</a>              | <a href="#">RT</a> |  |  |  |  | 7     | 4.1E-1  | 1.0E0     |
|                          | Annotation Cluster 84 | Enrichment Score: 0.52                                             | <b>G</b>           |  |  |  |  | Count | P_Value | Benjamini |
| <input type="checkbox"/> | GOTERM_BP_ALL         | <a href="#">regulation of cell motility</a>                        | <a href="#">RT</a> |  |  |  |  | 11    | 8.6E-2  | 9.7E-1    |
| <input type="checkbox"/> | GOTERM_BP_ALL         | <a href="#">regulation of cell migration</a>                       | <a href="#">RT</a> |  |  |  |  | 10    | 9.3E-2  | 9.8E-1    |
| <input type="checkbox"/> | GOTERM_BP_ALL         | <a href="#">regulation of locomotion</a>                           | <a href="#">RT</a> |  |  |  |  | 11    | 1.1E-1  | 9.9E-1    |
| <input type="checkbox"/> | GOTERM_BP_ALL         | <a href="#">locomotion</a>                                         | <a href="#">RT</a> |  |  |  |  | 11    | 1.7E-1  | 1.0E0     |
| <input type="checkbox"/> | GOTERM_BP_ALL         | <a href="#">positive regulation of cell migration</a>              | <a href="#">RT</a> |  |  |  |  | 4     | 2.1E-1  | 1.0E0     |
| <input type="checkbox"/> | GOTERM_BP_ALL         | <a href="#">positive regulation of cell motility</a>               | <a href="#">RT</a> |  |  |  |  | 4     | 2.9E-1  | 1.0E0     |
| <input type="checkbox"/> | GOTERM_BP_ALL         | <a href="#">positive regulation of locomotion</a>                  | <a href="#">RT</a> |  |  |  |  | 4     | 2.9E-1  | 1.0E0     |
| <input type="checkbox"/> | GOTERM_BP_ALL         | <a href="#">cell migration</a>                                     | <a href="#">RT</a> |  |  |  |  | 27    | 4.0E-1  | 1.0E0     |
| <input type="checkbox"/> | SP_PIR_KEYWORDS       | <a href="#">growth factor</a>                                      | <a href="#">RT</a> |  |  |  |  | 11    | 5.1E-1  | 1.0E0     |
| <input type="checkbox"/> | GOTERM_BP_ALL         | <a href="#">localization of cell</a>                               | <a href="#">RT</a> |  |  |  |  | 28    | 6.9E-1  | 1.0E0     |
| <input type="checkbox"/> | GOTERM_BP_ALL         | <a href="#">cell motility</a>                                      | <a href="#">RT</a> |  |  |  |  | 28    | 6.9E-1  | 1.0E0     |
| <input type="checkbox"/> | GOTERM_BP_ALL         | <a href="#">cell-matrix adhesion</a>                               | <a href="#">RT</a> |  |  |  |  | 6     | 7.7E-1  | 1.0E0     |
| <input type="checkbox"/> | GOTERM_BP_ALL         | <a href="#">cell-substrate adhesion</a>                            | <a href="#">RT</a> |  |  |  |  | 6     | 8.0E-1  | 1.0E0     |
|                          | Annotation Cluster 85 | Enrichment Score: 0.52                                             | <b>G</b>           |  |  |  |  | Count | P_Value | Benjamini |
| <input type="checkbox"/> | GOTERM_BP_ALL         | <a href="#">positive regulation of cell adhesion</a>               | <a href="#">RT</a> |  |  |  |  | 5     | 4.0E-2  | 9.1E-1    |
| <input type="checkbox"/> | GOTERM_BP_ALL         | <a href="#">bone remodeling</a>                                    | <a href="#">RT</a> |  |  |  |  | 13    | 2.0E-1  | 1.0E0     |
| <input type="checkbox"/> | GOTERM_BP_ALL         | <a href="#">regulation of ossification</a>                         | <a href="#">RT</a> |  |  |  |  | 5     | 2.1E-1  | 1.0E0     |
| <input type="checkbox"/> | GOTERM_BP_ALL         | <a href="#">ossification</a>                                       | <a href="#">RT</a> |  |  |  |  | 12    | 2.2E-1  | 1.0E0     |
| <input type="checkbox"/> | GOTERM_BP_ALL         | <a href="#">biomineral formation</a>                               | <a href="#">RT</a> |  |  |  |  | 12    | 2.2E-1  | 1.0E0     |
| <input type="checkbox"/> | GOTERM_BP_ALL         | <a href="#">osteoblast differentiation</a>                         | <a href="#">RT</a> |  |  |  |  | 5     | 2.3E-1  | 1.0E0     |
| <input type="checkbox"/> | GOTERM_BP_ALL         | <a href="#">regulation of bone remodeling</a>                      | <a href="#">RT</a> |  |  |  |  | 5     | 2.8E-1  | 1.0E0     |
| <input type="checkbox"/> | GOTERM_BP_ALL         | <a href="#">tissue remodeling</a>                                  | <a href="#">RT</a> |  |  |  |  | 13    | 3.8E-1  | 1.0E0     |
| <input type="checkbox"/> | GOTERM_BP_ALL         | <a href="#">cartilage development</a>                              | <a href="#">RT</a> |  |  |  |  | 5     | 6.7E-1  | 1.0E0     |
| <input type="checkbox"/> | GOTERM_BP_ALL         | <a href="#">regulation of cell adhesion</a>                        | <a href="#">RT</a> |  |  |  |  | 5     | 7.2E-1  | 1.0E0     |
| <input type="checkbox"/> | GOTERM_BP_ALL         | <a href="#">skeletal development</a>                               | <a href="#">RT</a> |  |  |  |  | 15    | 7.3E-1  | 1.0E0     |
| <input type="checkbox"/> | GOTERM_BP_ALL         | <a href="#">tissue development</a>                                 | <a href="#">RT</a> |  |  |  |  | 19    | 9.3E-1  | 1.0E0     |
|                          | Annotation Cluster 86 | Enrichment Score: 0.51                                             | <b>G</b>           |  |  |  |  | Count | P_Value | Benjamini |
| <input type="checkbox"/> | KEGG_PATHWAY          | <a href="#">SNARE interactions in vesicular transport</a>          | <a href="#">RT</a> |  |  |  |  | 5     | 2.4E-1  | 8.7E-1    |
| <input type="checkbox"/> | INTERPRO              | <a href="#">Syntaxin, N-terminal</a>                               | <a href="#">RT</a> |  |  |  |  | 3     | 2.6E-1  | 1.0E0     |
| <input type="checkbox"/> | INTERPRO              | <a href="#">Target SNARE coiled-coil region</a>                    | <a href="#">RT</a> |  |  |  |  | 4     | 3.0E-1  | 1.0E0     |
| <input type="checkbox"/> | SMART                 | <a href="#">SynN</a>                                               | <a href="#">RT</a> |  |  |  |  | 3     | 3.2E-1  | 9.9E-1    |
| <input type="checkbox"/> | INTERPRO              | <a href="#">Syntaxin/epimorphin coiled-coil</a>                    | <a href="#">RT</a> |  |  |  |  | 3     | 3.8E-1  | 1.0E0     |
| <input type="checkbox"/> | SMART                 | <a href="#">t_SNARE</a>                                            | <a href="#">RT</a> |  |  |  |  | 4     | 3.9E-1  | 9.9E-1    |
|                          | Annotation Cluster 87 | Enrichment Score: 0.5                                              | <b>G</b>           |  |  |  |  | Count | P_Value | Benjamini |
| <input type="checkbox"/> | UP_SEQ_FEATURE        | domain:F-box                                                       | <a href="#">RT</a> |  |  |  |  | 7     | 1.4E-1  | 1.0E0     |
| <input type="checkbox"/> | SMART                 | <a href="#">FBOX</a>                                               | <a href="#">RT</a> |  |  |  |  | 7     | 4.8E-1  | 1.0E0     |
| <input type="checkbox"/> | INTERPRO              | <a href="#">Cyclin-like F-box</a>                                  | <a href="#">RT</a> |  |  |  |  | 6     | 4.8E-1  | 1.0E0     |
|                          | Annotation Cluster 88 | Enrichment Score: 0.49                                             | <b>G</b>           |  |  |  |  | Count | P_Value | Benjamini |

|                          |                 |                                                                                                                 |    |  |       |         |           |
|--------------------------|-----------------|-----------------------------------------------------------------------------------------------------------------|----|--|-------|---------|-----------|
| <input type="checkbox"/> | SP_PIR_KEYWORDS | <a href="#">thiol protease</a>                                                                                  | RT |  | 14    | 6.1E-2  | 8.1E-1    |
| <input type="checkbox"/> | GOTERM_MF_ALL   | <a href="#">cysteine-type peptidase activity</a>                                                                | RT |  | 18    | 1.4E-1  | 1.0E0     |
| <input type="checkbox"/> | GOTERM_MF_ALL   | <a href="#">small conjugating protein-specific protease activity</a>                                            | RT |  | 7     | 3.8E-1  | 1.0E0     |
| <input type="checkbox"/> | INTERPRO        | <a href="#">Peptidase C19, ubiquitin carboxyl-terminal hydrolase 2</a>                                          | RT |  | 5     | 4.6E-1  | 1.0E0     |
| <input type="checkbox"/> | GOTERM_MF_ALL   | <a href="#">ubiquitin-specific protease activity</a>                                                            | RT |  | 6     | 5.4E-1  | 1.0E0     |
| <input type="checkbox"/> | GOTERM_MF_ALL   | <a href="#">thiolester hydrolase activity</a>                                                                   | RT |  | 7     | 6.5E-1  | 1.0E0     |
| <input type="checkbox"/> | GOTERM_MF_ALL   | <a href="#">ubiquitin thiolesterase activity</a>                                                                | RT |  | 5     | 7.0E-1  | 1.0E0     |
| Annotation Cluster 89    |                 | Enrichment Score: 0.49                                                                                          | G  |  | Count | P_Value | Benjamini |
| <input type="checkbox"/> | INTERPRO        | <a href="#">RNA recognition motif, RNP-1</a>                                                                    | RT |  | 17    | 1.7E-1  | 1.0E0     |
| <input type="checkbox"/> | SMART           | <a href="#">RRM</a>                                                                                             | RT |  | 21    | 2.1E-1  | 9.7E-1    |
| <input type="checkbox"/> | INTERPRO        | <a href="#">Nucleotide-binding, alpha-beta plait</a>                                                            | RT |  | 16    | 2.4E-1  | 1.0E0     |
| <input type="checkbox"/> | SP_PIR_KEYWORDS | <a href="#">rna-binding</a>                                                                                     | RT |  | 31    | 4.8E-1  | 1.0E0     |
| <input type="checkbox"/> | GOTERM_MF_ALL   | <a href="#">RNA binding</a>                                                                                     | RT |  | 40    | 8.9E-1  | 1.0E0     |
| Annotation Cluster 90    |                 | Enrichment Score: 0.48                                                                                          | G  |  | Count | P_Value | Benjamini |
| <input type="checkbox"/> | GOTERM_BP_ALL   | <a href="#">adrenal gland development</a>                                                                       | RT |  | 3     | 1.8E-1  | 1.0E0     |
| <input type="checkbox"/> | GOTERM_BP_ALL   | <a href="#">gland development</a>                                                                               | RT |  | 8     | 3.4E-1  | 1.0E0     |
| <input type="checkbox"/> | GOTERM_BP_ALL   | <a href="#">endocrine system development</a>                                                                    | RT |  | 5     | 5.8E-1  | 1.0E0     |
| Annotation Cluster 91    |                 | Enrichment Score: 0.47                                                                                          | G  |  | Count | P_Value | Benjamini |
| <input type="checkbox"/> | INTERPRO        | <a href="#">Phox-like</a>                                                                                       | RT |  | 7     | 1.3E-1  | 1.0E0     |
| <input type="checkbox"/> | SMART           | <a href="#">PX</a>                                                                                              | RT |  | 7     | 2.1E-1  | 9.7E-1    |
| <input type="checkbox"/> | GOTERM_MF_ALL   | <a href="#">lipid binding</a>                                                                                   | RT |  | 35    | 3.5E-1  | 1.0E0     |
| <input type="checkbox"/> | GOTERM_MF_ALL   | <a href="#">phosphoinositide binding</a>                                                                        | RT |  | 14    | 6.5E-1  | 1.0E0     |
| <input type="checkbox"/> | GOTERM_MF_ALL   | <a href="#">phospholipid binding</a>                                                                            | RT |  | 17    | 7.1E-1  | 1.0E0     |
| Annotation Cluster 92    |                 | Enrichment Score: 0.47                                                                                          | G  |  | Count | P_Value | Benjamini |
| <input type="checkbox"/> | INTERPRO        | <a href="#">Tetratricopeptide region</a>                                                                        | RT |  | 13    | 7.3E-2  | 1.0E0     |
| <input type="checkbox"/> | INTERPRO        | <a href="#">Tetratricopeptide-like helical</a>                                                                  | RT |  | 13    | 1.4E-1  | 1.0E0     |
| <input type="checkbox"/> | SP_PIR_KEYWORDS | <a href="#">TPR repeat</a>                                                                                      | RT |  | 13    | 1.5E-1  | 9.2E-1    |
| <input type="checkbox"/> | SMART           | <a href="#">TPR</a>                                                                                             | RT |  | 13    | 2.0E-1  | 9.7E-1    |
| <input type="checkbox"/> | INTERPRO        | <a href="#">Tetratricopeptide TPR-1</a>                                                                         | RT |  | 9     | 2.5E-1  | 1.0E0     |
| <input type="checkbox"/> | INTERPRO        | <a href="#">Tetratricopeptide TPR2</a>                                                                          | RT |  | 6     | 3.6E-1  | 1.0E0     |
| <input type="checkbox"/> | UP_SEQ_FEATURE  | repeat:TPR 8                                                                                                    | RT |  | 3     | 4.2E-1  | 1.0E0     |
| <input type="checkbox"/> | UP_SEQ_FEATURE  | repeat:TPR 4                                                                                                    | RT |  | 4     | 5.0E-1  | 1.0E0     |
| <input type="checkbox"/> | UP_SEQ_FEATURE  | repeat:TPR 3                                                                                                    | RT |  | 5     | 5.6E-1  | 1.0E0     |
| <input type="checkbox"/> | UP_SEQ_FEATURE  | repeat:TPR 7                                                                                                    | RT |  | 3     | 5.8E-1  | 1.0E0     |
| <input type="checkbox"/> | UP_SEQ_FEATURE  | repeat:TPR 1                                                                                                    | RT |  | 5     | 6.2E-1  | 1.0E0     |
| <input type="checkbox"/> | UP_SEQ_FEATURE  | repeat:TPR 2                                                                                                    | RT |  | 5     | 6.2E-1  | 1.0E0     |
| <input type="checkbox"/> | UP_SEQ_FEATURE  | repeat:TPR 6                                                                                                    | RT |  | 3     | 6.2E-1  | 1.0E0     |
| <input type="checkbox"/> | UP_SEQ_FEATURE  | repeat:TPR 5                                                                                                    | RT |  | 3     | 6.4E-1  | 1.0E0     |
| Annotation Cluster 93    |                 | Enrichment Score: 0.47                                                                                          | G  |  | Count | P_Value | Benjamini |
| <input type="checkbox"/> | GOTERM_MF_ALL   | <a href="#">oxidoreductase activity, acting on the aldehyde or oxo group of donors, NAD or NADP as acceptor</a> | RT |  | 6     | 8.9E-2  | 9.9E-1    |
| <input type="checkbox"/> | KEGG_PATHWAY    | <a href="#">Propanoate metabolism</a>                                                                           | RT |  | 5     | 1.8E-1  | 8.6E-1    |
| <input type="checkbox"/> | GOTERM_MF_ALL   | <a href="#">oxidoreductase activity, acting on the aldehyde or oxo group of donors</a>                          | RT |  | 6     | 2.1E-1  | 1.0E0     |
| <input type="checkbox"/> | INTERPRO        | <a href="#">Aldehyde dehydrogenase</a>                                                                          | RT |  | 3     | 2.9E-1  | 1.0E0     |
| <input type="checkbox"/> | KEGG_PATHWAY    | <a href="#">Lysine degradation</a>                                                                              | RT |  | 4     | 5.9E-1  | 9.7E-1    |
| <input type="checkbox"/> | KEGG_PATHWAY    | <a href="#">Valine, leucine and isoleucine degradation</a>                                                      | RT |  | 4     | 6.1E-1  | 9.7E-1    |
| <input type="checkbox"/> | KEGG_PATHWAY    | <a href="#">Butanoate metabolism</a>                                                                            | RT |  | 4     | 7.1E-1  | 9.8E-1    |
| <input type="checkbox"/> | KEGG_PATHWAY    | <a href="#">Bile acid biosynthesis</a>                                                                          | RT |  | 3     | 7.2E-1  | 9.9E-1    |
| Annotation Cluster 94    |                 | Enrichment Score: 0.46                                                                                          | G  |  | Count | P_Value | Benjamini |

| <input type="checkbox"/> | KEGG_PATHWAY           | <a href="#">Propanoate metabolism</a>                                                              | <a href="#">RT</a> |  |  |  |  | 5     | 1.8E-1  | 8.6E-1    |
|--------------------------|------------------------|----------------------------------------------------------------------------------------------------|--------------------|--|--|--|--|-------|---------|-----------|
| <input type="checkbox"/> | KEGG_PATHWAY           | <a href="#">Pyruvate metabolism</a>                                                                | <a href="#">RT</a> |  |  |  |  | 5     | 3.7E-1  | 9.1E-1    |
| <input type="checkbox"/> | KEGG_PATHWAY           | <a href="#">Glycolysis / Gluconeogenesis</a>                                                       | <a href="#">RT</a> |  |  |  |  | 5     | 5.9E-1  | 9.7E-1    |
|                          | Annotation Cluster 95  | Enrichment Score: 0.46                                                                             | <b>G</b>           |  |  |  |  | Count | P_Value | Benjamini |
| <input type="checkbox"/> | GOTERM_MF_ALL          | <a href="#">insulin-like growth factor binding</a>                                                 | <a href="#">RT</a> |  |  |  |  | 4     | 2.2E-1  | 1.0E0     |
| <input type="checkbox"/> | UP_SEQ_FEATURE         | domain:IGFBP N-terminal                                                                            | <a href="#">RT</a> |  |  |  |  | 3     | 3.6E-1  | 1.0E0     |
| <input type="checkbox"/> | SMART                  | <a href="#">IB</a>                                                                                 | <a href="#">RT</a> |  |  |  |  | 3     | 5.1E-1  | 1.0E0     |
|                          | Annotation Cluster 96  | Enrichment Score: 0.46                                                                             | <b>G</b>           |  |  |  |  | Count | P_Value | Benjamini |
| <input type="checkbox"/> | INTERPRO               | <a href="#">Guanine-nucleotide dissociation stimulator CDC25</a>                                   | <a href="#">RT</a> |  |  |  |  | 4     | 3.0E-1  | 1.0E0     |
| <input type="checkbox"/> | INTERPRO               | <a href="#">Ras guanine nucleotide exchange factor</a>                                             | <a href="#">RT</a> |  |  |  |  | 4     | 3.7E-1  | 1.0E0     |
| <input type="checkbox"/> | SMART                  | <a href="#">RasGEF</a>                                                                             | <a href="#">RT</a> |  |  |  |  | 4     | 3.9E-1  | 9.9E-1    |
|                          | Annotation Cluster 97  | Enrichment Score: 0.45                                                                             | <b>G</b>           |  |  |  |  | Count | P_Value | Benjamini |
| <input type="checkbox"/> | GOTERM_MF_ALL          | <a href="#">GTPase activity</a>                                                                    | <a href="#">RT</a> |  |  |  |  | 19    | 4.1E-2  | 9.4E-1    |
| <input type="checkbox"/> | GOTERM_MF_ALL          | <a href="#">pyrophosphatase activity</a>                                                           | <a href="#">RT</a> |  |  |  |  | 46    | 3.7E-1  | 1.0E0     |
| <input type="checkbox"/> | GOTERM_MF_ALL          | <a href="#">nucleoside-triphosphatase activity</a>                                                 | <a href="#">RT</a> |  |  |  |  | 44    | 3.8E-1  | 1.0E0     |
| <input type="checkbox"/> | GOTERM_MF_ALL          | <a href="#">hydrolase activity, acting on acid anhydrides, in phosphorus-containing anhydrides</a> | <a href="#">RT</a> |  |  |  |  | 46    | 4.1E-1  | 1.0E0     |
| <input type="checkbox"/> | GOTERM_MF_ALL          | <a href="#">hydrolase activity, acting on acid anhydrides</a>                                      | <a href="#">RT</a> |  |  |  |  | 46    | 4.1E-1  | 1.0E0     |
| <input type="checkbox"/> | GOTERM_MF_ALL          | <a href="#">ATPase activity</a>                                                                    | <a href="#">RT</a> |  |  |  |  | 23    | 7.5E-1  | 1.0E0     |
| <input type="checkbox"/> | GOTERM_MF_ALL          | <a href="#">ATPase activity, coupled</a>                                                           | <a href="#">RT</a> |  |  |  |  | 17    | 9.1E-1  | 1.0E0     |
|                          | Annotation Cluster 98  | Enrichment Score: 0.43                                                                             | <b>G</b>           |  |  |  |  | Count | P_Value | Benjamini |
| <input type="checkbox"/> | GOTERM_BP_ALL          | <a href="#">cell development</a>                                                                   | <a href="#">RT</a> |  |  |  |  | 112   | 7.9E-2  | 9.7E-1    |
| <input type="checkbox"/> | GOTERM_BP_ALL          | <a href="#">cellular developmental process</a>                                                     | <a href="#">RT</a> |  |  |  |  | 157   | 1.7E-1  | 1.0E0     |
| <input type="checkbox"/> | GOTERM_BP_ALL          | <a href="#">cell differentiation</a>                                                               | <a href="#">RT</a> |  |  |  |  | 157   | 1.7E-1  | 1.0E0     |
| <input type="checkbox"/> | GOTERM_BP_ALL          | <a href="#">developmental process</a>                                                              | <a href="#">RT</a> |  |  |  |  | 244   | 2.7E-1  | 1.0E0     |
| <input type="checkbox"/> | GOTERM_BP_ALL          | <a href="#">organ development</a>                                                                  | <a href="#">RT</a> |  |  |  |  | 111   | 5.9E-1  | 1.0E0     |
| <input type="checkbox"/> | GOTERM_BP_ALL          | <a href="#">system development</a>                                                                 | <a href="#">RT</a> |  |  |  |  | 134   | 6.9E-1  | 1.0E0     |
| <input type="checkbox"/> | GOTERM_BP_ALL          | <a href="#">multicellular organismal development</a>                                               | <a href="#">RT</a> |  |  |  |  | 172   | 7.2E-1  | 1.0E0     |
| <input type="checkbox"/> | GOTERM_BP_ALL          | <a href="#">anatomical structure development</a>                                                   | <a href="#">RT</a> |  |  |  |  | 155   | 7.6E-1  | 1.0E0     |
| <input type="checkbox"/> | GOTERM_BP_ALL          | <a href="#">multicellular organismal process</a>                                                   | <a href="#">RT</a> |  |  |  |  | 208   | 9.6E-1  | 1.0E0     |
|                          | Annotation Cluster 99  | Enrichment Score: 0.43                                                                             | <b>G</b>           |  |  |  |  | Count | P_Value | Benjamini |
| <input type="checkbox"/> | GOTERM_CC_ALL          | <a href="#">condensed chromosome, pericentric region</a>                                           | <a href="#">RT</a> |  |  |  |  | 3     | 1.4E-1  | 1.0E0     |
| <input type="checkbox"/> | GOTERM_CC_ALL          | <a href="#">chromosome, pericentric region</a>                                                     | <a href="#">RT</a> |  |  |  |  | 6     | 5.8E-1  | 1.0E0     |
| <input type="checkbox"/> | GOTERM_CC_ALL          | <a href="#">condensed chromosome</a>                                                               | <a href="#">RT</a> |  |  |  |  | 5     | 6.2E-1  | 1.0E0     |
|                          | Annotation Cluster 100 | Enrichment Score: 0.42                                                                             | <b>G</b>           |  |  |  |  | Count | P_Value | Benjamini |
| <input type="checkbox"/> | GOTERM_BP_ALL          | <a href="#">regulation of ARF protein signal transduction</a>                                      | <a href="#">RT</a> |  |  |  |  | 3     | 3.3E-1  | 1.0E0     |
| <input type="checkbox"/> | GOTERM_MF_ALL          | <a href="#">ARF guanyl-nucleotide exchange factor activity</a>                                     | <a href="#">RT</a> |  |  |  |  | 3     | 3.6E-1  | 1.0E0     |
| <input type="checkbox"/> | GOTERM_BP_ALL          | <a href="#">ARF protein signal transduction</a>                                                    | <a href="#">RT</a> |  |  |  |  | 3     | 3.6E-1  | 1.0E0     |
| <input type="checkbox"/> | INTERPRO               | <a href="#">SEC7-like</a>                                                                          | <a href="#">RT</a> |  |  |  |  | 3     | 3.8E-1  | 1.0E0     |
| <input type="checkbox"/> | SMART                  | <a href="#">Sec7</a>                                                                               | <a href="#">RT</a> |  |  |  |  | 3     | 4.5E-1  | 1.0E0     |
|                          | Annotation Cluster 101 | Enrichment Score: 0.41                                                                             | <b>G</b>           |  |  |  |  | Count | P_Value | Benjamini |
| <input type="checkbox"/> | GOTERM_BP_ALL          | <a href="#">acetyl-CoA biosynthetic process</a>                                                    | <a href="#">RT</a> |  |  |  |  | 3     | 7.6E-2  | 9.6E-1    |
| <input type="checkbox"/> | GOTERM_BP_ALL          | <a href="#">acetyl-CoA metabolic process</a>                                                       | <a href="#">RT</a> |  |  |  |  | 3     | 7.9E-1  | 1.0E0     |
| <input type="checkbox"/> | GOTERM_BP_ALL          | <a href="#">coenzyme metabolic process</a>                                                         | <a href="#">RT</a> |  |  |  |  | 9     | 9.7E-1  | 1.0E0     |
|                          | Annotation Cluster 102 | Enrichment Score: 0.41                                                                             | <b>G</b>           |  |  |  |  | Count | P_Value | Benjamini |
| <input type="checkbox"/> | KEGG_PATHWAY           | <a href="#">ABC transporters - General</a>                                                         | <a href="#">RT</a> |  |  |  |  | 8     | 2.5E-2  | 3.9E-1    |
| <input type="checkbox"/> | UP_SEQ_FEATURE         | nucleotide phosphate-binding region:ATP 2                                                          | <a href="#">RT</a> |  |  |  |  | 4     | 1.3E-1  | 1.0E0     |
| <input type="checkbox"/> | UP_SEQ_FEATURE         | nucleotide phosphate-binding region:ATP 1                                                          | <a href="#">RT</a> |  |  |  |  | 4     | 1.3E-1  | 1.0E0     |



|                          |                 |                                                                                                                |                    |  |       |         |           |
|--------------------------|-----------------|----------------------------------------------------------------------------------------------------------------|--------------------|--|-------|---------|-----------|
| <input type="checkbox"/> | UP_SEQ_FEATURE  | domain:ABC transporter 2                                                                                       | <a href="#">RT</a> |  | 4     | 1.3E-1  | 1.0E0     |
| <input type="checkbox"/> | UP_SEQ_FEATURE  | domain:ABC transporter 1                                                                                       | <a href="#">RT</a> |  | 4     | 1.3E-1  | 1.0E0     |
| <input type="checkbox"/> | UP_SEQ_FEATURE  | domain:ABC transmembrane type-1 2                                                                              | <a href="#">RT</a> |  | 3     | 1.7E-1  | 1.0E0     |
| <input type="checkbox"/> | UP_SEQ_FEATURE  | domain:ABC transmembrane type-1 1                                                                              | <a href="#">RT</a> |  | 3     | 1.7E-1  | 1.0E0     |
| <input type="checkbox"/> | INTERPRO        | <a href="#">ABC transporter, transmembrane region, type 1</a>                                                  | <a href="#">RT</a> |  | 4     | 3.2E-1  | 1.0E0     |
| <input type="checkbox"/> | COG_ONTOLOGY    | <a href="#">Defense mechanisms</a>                                                                             | <a href="#">RT</a> |  | 4     | 6.0E-1  | 1.0E0     |
| <input type="checkbox"/> | SP_PIR_KEYWORDS | <a href="#">nucleotide binding</a>                                                                             | <a href="#">RT</a> |  | 7     | 6.1E-1  | 1.0E0     |
| <input type="checkbox"/> | SP_PIR_KEYWORDS | <a href="#">P-loop</a>                                                                                         | <a href="#">RT</a> |  | 7     | 6.2E-1  | 1.0E0     |
| <input type="checkbox"/> | BIOCARTA        | <a href="#">Nuclear Receptors in Lipid Metabolism and Toxicity</a>                                             | <a href="#">RT</a> |  | 4     | 6.9E-1  | 1.0E0     |
| <input type="checkbox"/> | GOTERM_MF_ALL   | <a href="#">ATPase activity</a>                                                                                | <a href="#">RT</a> |  | 23    | 7.5E-1  | 1.0E0     |
| <input type="checkbox"/> | GOTERM_MF_ALL   | <a href="#">ATPase activity, coupled to movement of substances</a>                                             | <a href="#">RT</a> |  | 9     | 8.4E-1  | 1.0E0     |
| <input type="checkbox"/> | GOTERM_MF_ALL   | <a href="#">ATPase activity, coupled to transmembrane movement of substances</a>                               | <a href="#">RT</a> |  | 9     | 8.4E-1  | 1.0E0     |
| <input type="checkbox"/> | GOTERM_MF_ALL   | <a href="#">hydrolase activity, acting on acid anhydrides, catalyzing transmembrane movement of substances</a> | <a href="#">RT</a> |  | 9     | 8.6E-1  | 1.0E0     |
| <input type="checkbox"/> | GOTERM_MF_ALL   | <a href="#">P-P-bond-hydrolysis-driven transmembrane transporter activity</a>                                  | <a href="#">RT</a> |  | 9     | 9.1E-1  | 1.0E0     |
| <input type="checkbox"/> | GOTERM_MF_ALL   | <a href="#">primary active transmembrane transporter activity</a>                                              | <a href="#">RT</a> |  | 9     | 9.1E-1  | 1.0E0     |
| <input type="checkbox"/> | GOTERM_MF_ALL   | <a href="#">ATPase activity, coupled</a>                                                                       | <a href="#">RT</a> |  | 17    | 9.1E-1  | 1.0E0     |
| <input type="checkbox"/> | GOTERM_MF_ALL   | <a href="#">ATPase activity, coupled to transmembrane movement of ions, phosphorylative mechanism</a>          | <a href="#">RT</a> |  | 3     | 9.7E-1  | 1.0E0     |
| <input type="checkbox"/> | GOTERM_MF_ALL   | <a href="#">ATPase activity, coupled to transmembrane movement of ions</a>                                     | <a href="#">RT</a> |  | 4     | 9.8E-1  | 1.0E0     |
| Annotation Cluster 103   |                 | Enrichment Score: 0.4                                                                                          | <b>G</b>           |  | Count | P_Value | Benjamini |
| <input type="checkbox"/> | INTERPRO        | <a href="#">Protein phosphatase 2C, manganese/magnesium aspartate binding site</a>                             | <a href="#">RT</a> |  | 3     | 2.6E-1  | 1.0E0     |
| <input type="checkbox"/> | GOTERM_MF_ALL   | <a href="#">protein serine/threonine phosphatase activity</a>                                                  | <a href="#">RT</a> |  | 5     | 3.1E-1  | 1.0E0     |
| <input type="checkbox"/> | INTERPRO        | <a href="#">Protein phosphatase 2C</a>                                                                         | <a href="#">RT</a> |  | 3     | 3.2E-1  | 1.0E0     |
| <input type="checkbox"/> | INTERPRO        | <a href="#">Protein phosphatase 2C, N-terminal</a>                                                             | <a href="#">RT</a> |  | 3     | 3.8E-1  | 1.0E0     |
| <input type="checkbox"/> | INTERPRO        | <a href="#">Protein phosphatase 2C-related</a>                                                                 | <a href="#">RT</a> |  | 3     | 4.1E-1  | 1.0E0     |
| <input type="checkbox"/> | GOTERM_MF_ALL   | <a href="#">protein phosphatase type 2C activity</a>                                                           | <a href="#">RT</a> |  | 3     | 4.7E-1  | 1.0E0     |
| <input type="checkbox"/> | SMART           | <a href="#">PP2C_SIG</a>                                                                                       | <a href="#">RT</a> |  | 3     | 4.8E-1  | 1.0E0     |
| <input type="checkbox"/> | SMART           | <a href="#">PP2Cc</a>                                                                                          | <a href="#">RT</a> |  | 3     | 4.8E-1  | 1.0E0     |
| <input type="checkbox"/> | GOTERM_CC_ALL   | <a href="#">protein serine/threonine phosphatase complex</a>                                                   | <a href="#">RT</a> |  | 3     | 6.2E-1  | 1.0E0     |
| Annotation Cluster 104   |                 | Enrichment Score: 0.39                                                                                         | <b>G</b>           |  | Count | P_Value | Benjamini |
| <input type="checkbox"/> | GOTERM_MF_ALL   | <a href="#">GTPase activity</a>                                                                                | <a href="#">RT</a> |  | 19    | 4.1E-2  | 9.4E-1    |
| <input type="checkbox"/> | INTERPRO        | <a href="#">Ras small GTPase, Rab type</a>                                                                     | <a href="#">RT</a> |  | 8     | 1.6E-1  | 1.0E0     |
| <input type="checkbox"/> | PIR_SUPERFAMILY | PIRSF001710:Ras-related protein Rab                                                                            | <a href="#">RT</a> |  | 7     | 2.3E-1  | 1.0E0     |
| <input type="checkbox"/> | SMART           | <a href="#">RAB</a>                                                                                            | <a href="#">RT</a> |  | 8     | 2.7E-1  | 9.8E-1    |
| <input type="checkbox"/> | GOTERM_MF_ALL   | <a href="#">GTP binding</a>                                                                                    | <a href="#">RT</a> |  | 30    | 2.9E-1  | 1.0E0     |
| <input type="checkbox"/> | UP_SEQ_FEATURE  | lipid moiety-binding region:S-geranylgeranyl cysteine                                                          | <a href="#">RT</a> |  | 9     | 3.0E-1  | 1.0E0     |
| <input type="checkbox"/> | GOTERM_MF_ALL   | <a href="#">guanyl nucleotide binding</a>                                                                      | <a href="#">RT</a> |  | 30    | 3.2E-1  | 1.0E0     |
| <input type="checkbox"/> | GOTERM_MF_ALL   | <a href="#">guanyl ribonucleotide binding</a>                                                                  | <a href="#">RT</a> |  | 30    | 3.2E-1  | 1.0E0     |
| <input type="checkbox"/> | INTERPRO        | <a href="#">Ras</a>                                                                                            | <a href="#">RT</a> |  | 11    | 3.9E-1  | 1.0E0     |
| <input type="checkbox"/> | SP_PIR_KEYWORDS | <a href="#">prenylation</a>                                                                                    | <a href="#">RT</a> |  | 12    | 4.9E-1  | 1.0E0     |
| <input type="checkbox"/> | SP_PIR_KEYWORDS | <a href="#">GTP-binding</a>                                                                                    | <a href="#">RT</a> |  | 22    | 5.2E-1  | 1.0E0     |
| <input type="checkbox"/> | INTERPRO        | <a href="#">Ras GTPase</a>                                                                                     | <a href="#">RT</a> |  | 12    | 5.5E-1  | 1.0E0     |
| <input type="checkbox"/> | UP_SEQ_FEATURE  | short sequence motif:Effector region                                                                           | <a href="#">RT</a> |  | 6     | 7.4E-1  | 1.0E0     |
| <input type="checkbox"/> | SP_PIR_KEYWORDS | <a href="#">er-golgi transport</a>                                                                             | <a href="#">RT</a> |  | 4     | 8.6E-1  | 1.0E0     |

| <input type="checkbox"/> | INTERPRO               | <a href="#">Small GTP-binding protein domain</a>                     | <a href="#">RT</a> |  |  |  | 9     | 8.7E-1  | 1.0E0     |
|--------------------------|------------------------|----------------------------------------------------------------------|--------------------|--|--|--|-------|---------|-----------|
| <input type="checkbox"/> | GOTERM_BP_ALL          | <a href="#">Golgi vesicle transport</a>                              | <a href="#">RT</a> |  |  |  | 5     | 9.2E-1  | 1.0E0     |
| <input type="checkbox"/> | UP_SEQ_FEATURE         | nucleotide phosphate-binding region:GTP                              | <a href="#">RT</a> |  |  |  | 11    | 9.4E-1  | 1.0E0     |
| <input type="checkbox"/> | GOTERM_BP_ALL          | <a href="#">ER to Golgi vesicle-mediated transport</a>               | <a href="#">RT</a> |  |  |  | 3     | 9.5E-1  | 1.0E0     |
|                          | Annotation Cluster 105 | Enrichment Score: 0.38                                               | <b>G</b>           |  |  |  | Count | P_Value | Benjamini |
| <input type="checkbox"/> | BIOCARTA               | <a href="#">NFkB activation by Nontypeable Hemophilus influenzae</a> | <a href="#">RT</a> |  |  |  | 6     | 1.6E-1  | 1.0E0     |
| <input type="checkbox"/> | BIOCARTA               | <a href="#">TGF beta signaling pathway</a>                           | <a href="#">RT</a> |  |  |  | 4     | 2.9E-1  | 1.0E0     |
| <input type="checkbox"/> | KEGG_PATHWAY           | <a href="#">Adherens junction</a>                                    | <a href="#">RT</a> |  |  |  | 5     | 8.0E-1  | 9.9E-1    |
| <input type="checkbox"/> | KEGG_PATHWAY           | <a href="#">Cell cycle</a>                                           | <a href="#">RT</a> |  |  |  | 7     | 8.1E-1  | 9.9E-1    |
|                          | Annotation Cluster 106 | Enrichment Score: 0.38                                               | <b>G</b>           |  |  |  | Count | P_Value | Benjamini |
| <input type="checkbox"/> | UP_SEQ_FEATURE         | zinc finger region:C2H2-type 3; atypical                             | <a href="#">RT</a> |  |  |  | 3     | 9.0E-2  | 1.0E0     |
| <input type="checkbox"/> | UP_SEQ_FEATURE         | zinc finger region:C2H2-type 1; atypical                             | <a href="#">RT</a> |  |  |  | 3     | 1.7E-1  | 1.0E0     |
| <input type="checkbox"/> | UP_SEQ_FEATURE         | zinc finger region:C2H2-type 7                                       | <a href="#">RT</a> |  |  |  | 6     | 2.8E-1  | 1.0E0     |
| <input type="checkbox"/> | UP_SEQ_FEATURE         | zinc finger region:C2H2-type 2                                       | <a href="#">RT</a> |  |  |  | 12    | 3.6E-1  | 1.0E0     |
| <input type="checkbox"/> | UP_SEQ_FEATURE         | zinc finger region:C2H2-type 3                                       | <a href="#">RT</a> |  |  |  | 11    | 4.3E-1  | 1.0E0     |
| <input type="checkbox"/> | UP_SEQ_FEATURE         | zinc finger region:C2H2-type 4                                       | <a href="#">RT</a> |  |  |  | 9     | 4.3E-1  | 1.0E0     |
| <input type="checkbox"/> | UP_SEQ_FEATURE         | zinc finger region:C2H2-type 8                                       | <a href="#">RT</a> |  |  |  | 5     | 4.5E-1  | 1.0E0     |
| <input type="checkbox"/> | UP_SEQ_FEATURE         | zinc finger region:C2H2-type 6                                       | <a href="#">RT</a> |  |  |  | 6     | 4.6E-1  | 1.0E0     |
| <input type="checkbox"/> | UP_SEQ_FEATURE         | zinc finger region:C2H2-type 1                                       | <a href="#">RT</a> |  |  |  | 11    | 4.9E-1  | 1.0E0     |
| <input type="checkbox"/> | UP_SEQ_FEATURE         | zinc finger region:C2H2-type 5                                       | <a href="#">RT</a> |  |  |  | 7     | 5.2E-1  | 1.0E0     |
| <input type="checkbox"/> | UP_SEQ_FEATURE         | domain:KRAB                                                          | <a href="#">RT</a> |  |  |  | 3     | 5.4E-1  | 1.0E0     |
| <input type="checkbox"/> | UP_SEQ_FEATURE         | zinc finger region:C2H2-type 13                                      | <a href="#">RT</a> |  |  |  | 3     | 5.6E-1  | 1.0E0     |
| <input type="checkbox"/> | UP_SEQ_FEATURE         | zinc finger region:C2H2-type 9                                       | <a href="#">RT</a> |  |  |  | 4     | 5.8E-1  | 1.0E0     |
| <input type="checkbox"/> | UP_SEQ_FEATURE         | zinc finger region:C2H2-type 11                                      | <a href="#">RT</a> |  |  |  | 3     | 6.6E-1  | 1.0E0     |
| <input type="checkbox"/> | UP_SEQ_FEATURE         | zinc finger region:C2H2-type 12                                      | <a href="#">RT</a> |  |  |  | 3     | 6.8E-1  | 1.0E0     |
| <input type="checkbox"/> | UP_SEQ_FEATURE         | zinc finger region:C2H2-type 10                                      | <a href="#">RT</a> |  |  |  | 3     | 7.7E-1  | 1.0E0     |
|                          | Annotation Cluster 107 | Enrichment Score: 0.38                                               | <b>G</b>           |  |  |  | Count | P_Value | Benjamini |
| <input type="checkbox"/> | UP_SEQ_FEATURE         | domain:Rho-GAP                                                       | <a href="#">RT</a> |  |  |  | 4     | 3.0E-1  | 1.0E0     |
| <input type="checkbox"/> | INTERPRO               | <a href="#">RhoGAP</a>                                               | <a href="#">RT</a> |  |  |  | 5     | 4.2E-1  | 1.0E0     |
| <input type="checkbox"/> | SMART                  | <a href="#">RhoGAP</a>                                               | <a href="#">RT</a> |  |  |  | 5     | 5.8E-1  | 1.0E0     |
|                          | Annotation Cluster 108 | Enrichment Score: 0.37                                               | <b>G</b>           |  |  |  | Count | P_Value | Benjamini |
| <input type="checkbox"/> | GOTERM_MF_ALL          | <a href="#">enzyme binding</a>                                       | <a href="#">RT</a> |  |  |  | 19    | 3.6E-1  | 1.0E0     |
| <input type="checkbox"/> | GOTERM_MF_ALL          | <a href="#">kinase binding</a>                                       | <a href="#">RT</a> |  |  |  | 8     | 4.3E-1  | 1.0E0     |
| <input type="checkbox"/> | GOTERM_MF_ALL          | <a href="#">protein kinase binding</a>                               | <a href="#">RT</a> |  |  |  | 7     | 4.9E-1  | 1.0E0     |
|                          | Annotation Cluster 109 | Enrichment Score: 0.37                                               | <b>G</b>           |  |  |  | Count | P_Value | Benjamini |
| <input type="checkbox"/> | GOTERM_MF_ALL          | <a href="#">carbohydrate transmembrane transporter activity</a>      | <a href="#">RT</a> |  |  |  | 6     | 2.6E-1  | 1.0E0     |
| <input type="checkbox"/> | GOTERM_MF_ALL          | <a href="#">glucose transmembrane transporter activity</a>           | <a href="#">RT</a> |  |  |  | 3     | 2.7E-1  | 1.0E0     |
| <input type="checkbox"/> | GOTERM_MF_ALL          | <a href="#">monosaccharide transmembrane transporter activity</a>    | <a href="#">RT</a> |  |  |  | 3     | 3.0E-1  | 1.0E0     |
| <input type="checkbox"/> | GOTERM_MF_ALL          | <a href="#">hexose transmembrane transporter activity</a>            | <a href="#">RT</a> |  |  |  | 3     | 3.0E-1  | 1.0E0     |
| <input type="checkbox"/> | GOTERM_MF_ALL          | <a href="#">sugar:hydrogen ion symporter activity</a>                | <a href="#">RT</a> |  |  |  | 5     | 4.2E-1  | 1.0E0     |
| <input type="checkbox"/> | GOTERM_MF_ALL          | <a href="#">sugar transmembrane transporter activity</a>             | <a href="#">RT</a> |  |  |  | 5     | 4.3E-1  | 1.0E0     |
| <input type="checkbox"/> | GOTERM_MF_ALL          | <a href="#">symporter activity</a>                                   | <a href="#">RT</a> |  |  |  | 13    | 4.4E-1  | 1.0E0     |
| <input type="checkbox"/> | GOTERM_BP_ALL          | <a href="#">carbohydrate transport</a>                               | <a href="#">RT</a> |  |  |  | 7     | 4.9E-1  | 1.0E0     |
| <input type="checkbox"/> | GOTERM_MF_ALL          | <a href="#">secondary active transmembrane transporter activity</a>  | <a href="#">RT</a> |  |  |  | 15    | 6.1E-1  | 1.0E0     |
| <input type="checkbox"/> | SP_PIR_KEYWORDS        | <a href="#">sugar transport</a>                                      | <a href="#">RT</a> |  |  |  | 3     | 6.9E-1  | 1.0E0     |
| <input type="checkbox"/> | GOTERM_MF_ALL          | <a href="#">active transmembrane transporter activity</a>            | <a href="#">RT</a> |  |  |  | 24    | 8.2E-1  | 1.0E0     |
|                          | Annotation Cluster 110 | Enrichment Score: 0.37                                               | <b>G</b>           |  |  |  | Count | P_Value | Benjamini |
| <input type="checkbox"/> | GOTERM_BP_ALL          | <a href="#">interphase</a>                                           | <a href="#">RT</a> |  |  |  | 7     | 3.2E-1  | 1.0E0     |

| <input type="checkbox"/> | GOTERM_BP_ALL          | <a href="#">interphase of mitotic cell cycle</a>                      | <a href="#">RT</a> |  |  |  | 7     | 3.2E-1  | 1.0E0     |  |
|--------------------------|------------------------|-----------------------------------------------------------------------|--------------------|--|--|--|-------|---------|-----------|--|
| <input type="checkbox"/> | GOTERM_BP_ALL          | <a href="#">G1/S transition of mitotic cell cycle</a>                 | <a href="#">RT</a> |  |  |  | 4     | 4.3E-1  | 1.0E0     |  |
| <input type="checkbox"/> | GOTERM_BP_ALL          | <a href="#">mitotic cell cycle</a>                                    | <a href="#">RT</a> |  |  |  | 18    | 7.8E-1  | 1.0E0     |  |
|                          | Annotation Cluster 111 | Enrichment Score: 0.36                                                | <b>G</b>           |  |  |  | Count | P_Value | Benjamini |  |
| <input type="checkbox"/> | UP_SEQ_FEATURE         | domain:Ubiquitin-like                                                 | <a href="#">RT</a> |  |  |  | 4     | 2.4E-1  | 1.0E0     |  |
| <input type="checkbox"/> | INTERPRO               | <a href="#">Ubiquitin</a>                                             | <a href="#">RT</a> |  |  |  | 5     | 5.1E-1  | 1.0E0     |  |
| <input type="checkbox"/> | SMART                  | <a href="#">UBO</a>                                                   | <a href="#">RT</a> |  |  |  | 5     | 6.8E-1  | 1.0E0     |  |
|                          | Annotation Cluster 112 | Enrichment Score: 0.36                                                | <b>G</b>           |  |  |  | Count | P_Value | Benjamini |  |
| <input type="checkbox"/> | KEGG_PATHWAY           | <a href="#">Glycosphingolipid biosynthesis - ganglioseries</a>        | <a href="#">RT</a> |  |  |  | 4     | 9.7E-2  | 7.0E-1    |  |
| <input type="checkbox"/> | INTERPRO               | <a href="#">Glycosyl transferase, family 29</a>                       | <a href="#">RT</a> |  |  |  | 4     | 2.0E-1  | 1.0E0     |  |
| <input type="checkbox"/> | GOTERM_MF_ALL          | <a href="#">sialyltransferase activity</a>                            | <a href="#">RT</a> |  |  |  | 4     | 2.0E-1  | 1.0E0     |  |
| <input type="checkbox"/> | GOTERM_CC_ALL          | <a href="#">integral to Golgi membrane</a>                            | <a href="#">RT</a> |  |  |  | 5     | 2.0E-1  | 1.0E0     |  |
| <input type="checkbox"/> | KEGG_PATHWAY           | <a href="#">Glycan structures - biosynthesis 2</a>                    | <a href="#">RT</a> |  |  |  | 7     | 2.2E-1  | 8.8E-1    |  |
| <input type="checkbox"/> | KEGG_PATHWAY           | <a href="#">O-Glycan biosynthesis</a>                                 | <a href="#">RT</a> |  |  |  | 4     | 2.7E-1  | 8.8E-1    |  |
| <input type="checkbox"/> | GOTERM_CC_ALL          | <a href="#">intrinsic to Golgi membrane</a>                           | <a href="#">RT</a> |  |  |  | 5     | 3.0E-1  | 1.0E0     |  |
| <input type="checkbox"/> | GOTERM_CC_ALL          | <a href="#">intrinsic to organelle membrane</a>                       | <a href="#">RT</a> |  |  |  | 9     | 3.1E-1  | 1.0E0     |  |
| <input type="checkbox"/> | INTERPRO               | <a href="#">Sialyltransferase</a>                                     | <a href="#">RT</a> |  |  |  | 3     | 3.2E-1  | 1.0E0     |  |
| <input type="checkbox"/> | PIR_SUPERFAMILY        | PIRSF005557:sialyltransferase                                         | <a href="#">RT</a> |  |  |  | 3     | 3.3E-1  | 1.0E0     |  |
| <input type="checkbox"/> | GOTERM_CC_ALL          | <a href="#">integral to organelle membrane</a>                        | <a href="#">RT</a> |  |  |  | 8     | 3.5E-1  | 1.0E0     |  |
| <input type="checkbox"/> | GOTERM_BP_ALL          | <a href="#">protein amino acid O-linked glycosylation</a>             | <a href="#">RT</a> |  |  |  | 3     | 3.9E-1  | 1.0E0     |  |
| <input type="checkbox"/> | GOTERM_BP_ALL          | <a href="#">protein amino acid glycosylation</a>                      | <a href="#">RT</a> |  |  |  | 8     | 5.1E-1  | 1.0E0     |  |
| <input type="checkbox"/> | GOTERM_BP_ALL          | <a href="#">biopolymer glycosylation</a>                              | <a href="#">RT</a> |  |  |  | 8     | 5.5E-1  | 1.0E0     |  |
| <input type="checkbox"/> | GOTERM_MF_ALL          | <a href="#">transferase activity, transferring glycosyl groups</a>    | <a href="#">RT</a> |  |  |  | 19    | 5.7E-1  | 1.0E0     |  |
| <input type="checkbox"/> | GOTERM_BP_ALL          | <a href="#">glycoprotein metabolic process</a>                        | <a href="#">RT</a> |  |  |  | 10    | 5.8E-1  | 1.0E0     |  |
| <input type="checkbox"/> | GOTERM_BP_ALL          | <a href="#">glycoprotein biosynthetic process</a>                     | <a href="#">RT</a> |  |  |  | 8     | 6.3E-1  | 1.0E0     |  |
| <input type="checkbox"/> | GOTERM_CC_ALL          | <a href="#">Golgi membrane</a>                                        | <a href="#">RT</a> |  |  |  | 8     | 6.8E-1  | 1.0E0     |  |
| <input type="checkbox"/> | SP_PIR_KEYWORDS        | <a href="#">glycosyltransferase</a>                                   | <a href="#">RT</a> |  |  |  | 13    | 7.3E-1  | 1.0E0     |  |
| <input type="checkbox"/> | KEGG_PATHWAY           | <a href="#">Glycan structures - biosynthesis 1</a>                    | <a href="#">RT</a> |  |  |  | 7     | 8.1E-1  | 9.9E-1    |  |
| <input type="checkbox"/> | SP_PIR_KEYWORDS        | <a href="#">signal-anchor</a>                                         | <a href="#">RT</a> |  |  |  | 22    | 8.6E-1  | 1.0E0     |  |
| <input type="checkbox"/> | GOTERM_CC_ALL          | <a href="#">Golgi apparatus part</a>                                  | <a href="#">RT</a> |  |  |  | 10    | 9.1E-1  | 1.0E0     |  |
| <input type="checkbox"/> | UP_SEQ_FEATURE         | topological domain:Luminal                                            | <a href="#">RT</a> |  |  |  | 14    | 9.2E-1  | 1.0E0     |  |
| <input type="checkbox"/> | GOTERM_MF_ALL          | <a href="#">UDP-glycosyltransferase activity</a>                      | <a href="#">RT</a> |  |  |  | 5     | 9.5E-1  | 1.0E0     |  |
| <input type="checkbox"/> | GOTERM_MF_ALL          | <a href="#">transferase activity, transferring hexosyl groups</a>     | <a href="#">RT</a> |  |  |  | 7     | 9.8E-1  | 1.0E0     |  |
|                          | Annotation Cluster 113 | Enrichment Score: 0.35                                                | <b>G</b>           |  |  |  | Count | P_Value | Benjamini |  |
| <input type="checkbox"/> | UP_SEQ_FEATURE         | domain:WW                                                             | <a href="#">RT</a> |  |  |  | 3     | 1.9E-1  | 1.0E0     |  |
| <input type="checkbox"/> | SMART                  | <a href="#">WW</a>                                                    | <a href="#">RT</a> |  |  |  | 5     | 6.3E-1  | 1.0E0     |  |
| <input type="checkbox"/> | INTERPRO               | <a href="#">WW/Rsp5/WWP</a>                                           | <a href="#">RT</a> |  |  |  | 4     | 7.1E-1  | 1.0E0     |  |
|                          | Annotation Cluster 114 | Enrichment Score: 0.35                                                | <b>G</b>           |  |  |  | Count | P_Value | Benjamini |  |
| <input type="checkbox"/> | GOTERM_BP_ALL          | <a href="#">photoreceptor cell maintenance</a>                        | <a href="#">RT</a> |  |  |  | 4     | 5.0E-2  | 9.4E-1    |  |
| <input type="checkbox"/> | GOTERM_BP_ALL          | <a href="#">visual perception</a>                                     | <a href="#">RT</a> |  |  |  | 11    | 3.2E-1  | 1.0E0     |  |
| <input type="checkbox"/> | GOTERM_BP_ALL          | <a href="#">sensory perception of light stimulus</a>                  | <a href="#">RT</a> |  |  |  | 11    | 3.3E-1  | 1.0E0     |  |
| <input type="checkbox"/> | SP_PIR_KEYWORDS        | <a href="#">Vision</a>                                                | <a href="#">RT</a> |  |  |  | 4     | 7.9E-1  | 1.0E0     |  |
| <input type="checkbox"/> | GOTERM_BP_ALL          | <a href="#">sensory perception</a>                                    | <a href="#">RT</a> |  |  |  | 19    | 8.8E-1  | 1.0E0     |  |
| <input type="checkbox"/> | GOTERM_BP_ALL          | <a href="#">neurological system process</a>                           | <a href="#">RT</a> |  |  |  | 33    | 9.7E-1  | 1.0E0     |  |
| <input type="checkbox"/> | SP_PIR_KEYWORDS        | <a href="#">sensory transduction</a>                                  | <a href="#">RT</a> |  |  |  | 5     | 9.8E-1  | 1.0E0     |  |
|                          | Annotation Cluster 115 | Enrichment Score: 0.34                                                | <b>G</b>           |  |  |  | Count | P_Value | Benjamini |  |
| <input type="checkbox"/> | GOTERM_BP_ALL          | <a href="#">negative regulation of progression through cell cycle</a> | <a href="#">RT</a> |  |  |  | 17    | 8.2E-2  | 9.7E-1    |  |
| <input type="checkbox"/> | GOTERM_BP_ALL          | <a href="#">cell cycle</a>                                            | <a href="#">RT</a> |  |  |  | 58    | 5.7E-1  | 1.0E0     |  |

| <input type="checkbox"/> | GOTERM_BP_ALL          | <a href="#">regulation of cell cycle</a>                                                                                                      | RT |  |  |  |  | 30    | 5.8E-1  | 1.0E0     |
|--------------------------|------------------------|-----------------------------------------------------------------------------------------------------------------------------------------------|----|--|--|--|--|-------|---------|-----------|
| <input type="checkbox"/> | GOTERM_BP_ALL          | <a href="#">regulation of progression through cell cycle</a>                                                                                  | RT |  |  |  |  | 29    | 6.4E-1  | 1.0E0     |
| <input type="checkbox"/> | GOTERM_BP_ALL          | <a href="#">cell cycle process</a>                                                                                                            | RT |  |  |  |  | 45    | 6.7E-1  | 1.0E0     |
| <input type="checkbox"/> | GOTERM_BP_ALL          | <a href="#">cell cycle phase</a>                                                                                                              | RT |  |  |  |  | 22    | 7.2E-1  | 1.0E0     |
|                          | Annotation Cluster 116 | Enrichment Score: 0.33                                                                                                                        | G  |  |  |  |  | Count | P_Value | Benjamini |
| <input type="checkbox"/> | UP_SEQ_FEATURE         | domain:SAM                                                                                                                                    | RT |  |  |  |  | 6     | 1.2E-1  | 1.0E0     |
| <input type="checkbox"/> | SMART                  | <a href="#">SAM</a>                                                                                                                           | RT |  |  |  |  | 8     | 5.1E-1  | 1.0E0     |
| <input type="checkbox"/> | INTERPRO               | <a href="#">Sterile alpha motif SAM</a>                                                                                                       | RT |  |  |  |  | 7     | 5.1E-1  | 1.0E0     |
| <input type="checkbox"/> | INTERPRO               | <a href="#">Sterile alpha motif homology 2</a>                                                                                                | RT |  |  |  |  | 3     | 7.2E-1  | 1.0E0     |
| <input type="checkbox"/> | INTERPRO               | <a href="#">Sterile alpha motif-type</a>                                                                                                      | RT |  |  |  |  | 3     | 9.5E-1  | 1.0E0     |
|                          | Annotation Cluster 117 | Enrichment Score: 0.32                                                                                                                        | G  |  |  |  |  | Count | P_Value | Benjamini |
| <input type="checkbox"/> | GOTERM_BP_ALL          | <a href="#">positive regulation of cell differentiation</a>                                                                                   | RT |  |  |  |  | 7     | 3.2E-1  | 1.0E0     |
| <input type="checkbox"/> | GOTERM_BP_ALL          | <a href="#">positive regulation of myeloid cell differentiation</a>                                                                           | RT |  |  |  |  | 3     | 4.8E-1  | 1.0E0     |
| <input type="checkbox"/> | GOTERM_BP_ALL          | <a href="#">regulation of myeloid cell differentiation</a>                                                                                    | RT |  |  |  |  | 5     | 5.2E-1  | 1.0E0     |
| <input type="checkbox"/> | GOTERM_BP_ALL          | <a href="#">regulation of cell differentiation</a>                                                                                            | RT |  |  |  |  | 16    | 5.3E-1  | 1.0E0     |
| <input type="checkbox"/> | GOTERM_BP_ALL          | <a href="#">positive regulation of developmental process</a>                                                                                  | RT |  |  |  |  | 8     | 5.6E-1  | 1.0E0     |
|                          | Annotation Cluster 118 | Enrichment Score: 0.32                                                                                                                        | G  |  |  |  |  | Count | P_Value | Benjamini |
| <input type="checkbox"/> | GOTERM_MF_ALL          | <a href="#">oxidoreductase activity, acting on single donors with incorporation of molecular oxygen, incorporation of two atoms of oxygen</a> | RT |  |  |  |  | 6     | 4.8E-1  | 1.0E0     |
| <input type="checkbox"/> | GOTERM_MF_ALL          | <a href="#">dioxygenase activity</a>                                                                                                          | RT |  |  |  |  | 6     | 4.8E-1  | 1.0E0     |
| <input type="checkbox"/> | GOTERM_MF_ALL          | <a href="#">oxidoreductase activity, acting on single donors with incorporation of molecular oxygen</a>                                       | RT |  |  |  |  | 6     | 4.9E-1  | 1.0E0     |
|                          | Annotation Cluster 119 | Enrichment Score: 0.31                                                                                                                        | G  |  |  |  |  | Count | P_Value | Benjamini |
| <input type="checkbox"/> | SP_PIR_KEYWORDS        | <a href="#">lysosome</a>                                                                                                                      | RT |  |  |  |  | 11    | 3.9E-1  | 1.0E0     |
| <input type="checkbox"/> | GOTERM_CC_ALL          | <a href="#">vacuole</a>                                                                                                                       | RT |  |  |  |  | 17    | 5.0E-1  | 1.0E0     |
| <input type="checkbox"/> | GOTERM_CC_ALL          | <a href="#">lytic vacuole</a>                                                                                                                 | RT |  |  |  |  | 15    | 5.3E-1  | 1.0E0     |
| <input type="checkbox"/> | GOTERM_CC_ALL          | <a href="#">lysosome</a>                                                                                                                      | RT |  |  |  |  | 15    | 5.3E-1  | 1.0E0     |
|                          | Annotation Cluster 120 | Enrichment Score: 0.31                                                                                                                        | G  |  |  |  |  | Count | P_Value | Benjamini |
| <input type="checkbox"/> | UP_SEQ_FEATURE         | domain:Kazal-like                                                                                                                             | RT |  |  |  |  | 3     | 3.3E-1  | 1.0E0     |
| <input type="checkbox"/> | INTERPRO               | <a href="#">Proteinase inhibitor I1, Kazal</a>                                                                                                | RT |  |  |  |  | 4     | 5.3E-1  | 1.0E0     |
| <input type="checkbox"/> | SMART                  | <a href="#">KAZAL</a>                                                                                                                         | RT |  |  |  |  | 4     | 6.7E-1  | 1.0E0     |
|                          | Annotation Cluster 121 | Enrichment Score: 0.3                                                                                                                         | G  |  |  |  |  | Count | P_Value | Benjamini |
| <input type="checkbox"/> | GOTERM_BP_ALL          | <a href="#">neural tube formation</a>                                                                                                         | RT |  |  |  |  | 6     | 2.4E-1  | 1.0E0     |
| <input type="checkbox"/> | GOTERM_BP_ALL          | <a href="#">neural plate morphogenesis</a>                                                                                                    | RT |  |  |  |  | 6     | 2.5E-1  | 1.0E0     |
| <input type="checkbox"/> | GOTERM_BP_ALL          | <a href="#">neural plate development</a>                                                                                                      | RT |  |  |  |  | 6     | 2.7E-1  | 1.0E0     |
| <input type="checkbox"/> | GOTERM_BP_ALL          | <a href="#">embryonic epithelial tube formation</a>                                                                                           | RT |  |  |  |  | 6     | 2.8E-1  | 1.0E0     |
| <input type="checkbox"/> | GOTERM_BP_ALL          | <a href="#">tube morphogenesis</a>                                                                                                            | RT |  |  |  |  | 15    | 3.2E-1  | 1.0E0     |
| <input type="checkbox"/> | GOTERM_BP_ALL          | <a href="#">neural tube development</a>                                                                                                       | RT |  |  |  |  | 6     | 4.1E-1  | 1.0E0     |
| <input type="checkbox"/> | GOTERM_BP_ALL          | <a href="#">morphogenesis of embryonic epithelium</a>                                                                                         | RT |  |  |  |  | 6     | 5.3E-1  | 1.0E0     |
| <input type="checkbox"/> | GOTERM_BP_ALL          | <a href="#">tube development</a>                                                                                                              | RT |  |  |  |  | 17    | 5.8E-1  | 1.0E0     |
| <input type="checkbox"/> | GOTERM_BP_ALL          | <a href="#">morphogenesis of an epithelium</a>                                                                                                | RT |  |  |  |  | 10    | 5.8E-1  | 1.0E0     |
| <input type="checkbox"/> | GOTERM_BP_ALL          | <a href="#">in utero embryonic development</a>                                                                                                | RT |  |  |  |  | 10    | 6.6E-1  | 1.0E0     |
| <input type="checkbox"/> | GOTERM_BP_ALL          | <a href="#">neural tube closure</a>                                                                                                           | RT |  |  |  |  | 3     | 7.3E-1  | 1.0E0     |
| <input type="checkbox"/> | GOTERM_BP_ALL          | <a href="#">primary neural tube formation</a>                                                                                                 | RT |  |  |  |  | 3     | 7.6E-1  | 1.0E0     |
| <input type="checkbox"/> | GOTERM_BP_ALL          | <a href="#">embryonic development</a>                                                                                                         | RT |  |  |  |  | 33    | 7.6E-1  | 1.0E0     |
| <input type="checkbox"/> | GOTERM_BP_ALL          | <a href="#">chordate embryonic development</a>                                                                                                | RT |  |  |  |  | 16    | 7.7E-1  | 1.0E0     |
| <input type="checkbox"/> | GOTERM_BP_ALL          | <a href="#">embryonic development ending in birth or egg hatching</a>                                                                         | RT |  |  |  |  | 16    | 7.9E-1  | 1.0E0     |
| <input type="checkbox"/> | GOTERM_BP_ALL          | <a href="#">embryonic morphogenesis</a>                                                                                                       | RT |  |  |  |  | 13    | 8.4E-1  | 1.0E0     |

| Annotation Cluster 122   |                | Enrichment Score: 0.3                                                                       | G                  |    | Count | P_Value | Benjamini |
|--------------------------|----------------|---------------------------------------------------------------------------------------------|--------------------|---------------------------------------------------------------------------------------|-------|---------|-----------|
| <input type="checkbox"/> | UP_SEQ_FEATURE | domain:RRM 1                                                                                | <a href="#">RT</a> |      | 5     | 5.0E-1  | 1.0E0     |
| <input type="checkbox"/> | UP_SEQ_FEATURE | domain:RRM 2                                                                                | <a href="#">RT</a> |      | 5     | 5.0E-1  | 1.0E0     |
| <input type="checkbox"/> | UP_SEQ_FEATURE | domain:RRM 3                                                                                | <a href="#">RT</a> |      | 3     | 5.2E-1  | 1.0E0     |
| Annotation Cluster 123   |                | Enrichment Score: 0.3                                                                       | G                  |    | Count | P_Value | Benjamini |
| <input type="checkbox"/> | GOTERM_BP_ALL  | <a href="#">ubiquitin-dependent protein catabolic process</a>                               | <a href="#">RT</a> |      | 15    | 2.3E-1  | 1.0E0     |
| <input type="checkbox"/> | GOTERM_BP_ALL  | <a href="#">modification-dependent protein catabolic process</a>                            | <a href="#">RT</a> |      | 15    | 2.6E-1  | 1.0E0     |
| <input type="checkbox"/> | GOTERM_BP_ALL  | <a href="#">modification-dependent macromolecule catabolic process</a>                      | <a href="#">RT</a> |      | 15    | 2.6E-1  | 1.0E0     |
| <input type="checkbox"/> | GOTERM_BP_ALL  | <a href="#">proteolysis involved in cellular protein catabolic process</a>                  | <a href="#">RT</a> |      | 15    | 2.8E-1  | 1.0E0     |
| <input type="checkbox"/> | GOTERM_BP_ALL  | <a href="#">cellular protein catabolic process</a>                                          | <a href="#">RT</a> |      | 15    | 3.0E-1  | 1.0E0     |
| <input type="checkbox"/> | INTERPRO       | <a href="#">Peptidase C19, ubiquitin carboxyl-terminal hydrolase 2</a>                      | <a href="#">RT</a> |      | 5     | 4.6E-1  | 1.0E0     |
| <input type="checkbox"/> | GOTERM_BP_ALL  | <a href="#">biopolymer catabolic process</a>                                                | <a href="#">RT</a> |      | 21    | 6.6E-1  | 1.0E0     |
| <input type="checkbox"/> | GOTERM_BP_ALL  | <a href="#">protein catabolic process</a>                                                   | <a href="#">RT</a> |      | 16    | 6.6E-1  | 1.0E0     |
| <input type="checkbox"/> | GOTERM_MF_ALL  | <a href="#">ubiquitin thiolesterase activity</a>                                            | <a href="#">RT</a> |      | 5     | 7.0E-1  | 1.0E0     |
| <input type="checkbox"/> | GOTERM_BP_ALL  | <a href="#">cellular macromolecule catabolic process</a>                                    | <a href="#">RT</a> |      | 18    | 8.5E-1  | 1.0E0     |
| <input type="checkbox"/> | GOTERM_BP_ALL  | <a href="#">macromolecule catabolic process</a>                                             | <a href="#">RT</a> |      | 21    | 9.4E-1  | 1.0E0     |
| <input type="checkbox"/> | GOTERM_BP_ALL  | <a href="#">cellular catabolic process</a>                                                  | <a href="#">RT</a> |      | 29    | 9.5E-1  | 1.0E0     |
| <input type="checkbox"/> | GOTERM_BP_ALL  | <a href="#">catabolic process</a>                                                           | <a href="#">RT</a> |      | 35    | 9.9E-1  | 1.0E0     |
| Annotation Cluster 124   |                | Enrichment Score: 0.3                                                                       | G                  |    | Count | P_Value | Benjamini |
| <input type="checkbox"/> | INTERPRO       | <a href="#">Plexin/semaphorin/integrin</a>                                                  | <a href="#">RT</a> |      | 6     | 2.9E-1  | 1.0E0     |
| <input type="checkbox"/> | SMART          | <a href="#">PSI</a>                                                                         | <a href="#">RT</a> |      | 6     | 4.1E-1  | 9.9E-1    |
| <input type="checkbox"/> | INTERPRO       | <a href="#">Plexin</a>                                                                      | <a href="#">RT</a> |      | 4     | 4.5E-1  | 1.0E0     |
| <input type="checkbox"/> | UP_SEQ_FEATURE | domain:Sema                                                                                 | <a href="#">RT</a> |    | 3     | 5.2E-1  | 1.0E0     |
| <input type="checkbox"/> | INTERPRO       | <a href="#">Semaphorin/CD100 antigen</a>                                                    | <a href="#">RT</a> |    | 3     | 7.3E-1  | 1.0E0     |
| <input type="checkbox"/> | SMART          | <a href="#">Sema</a>                                                                        | <a href="#">RT</a> |    | 3     | 8.1E-1  | 1.0E0     |
| Annotation Cluster 125   |                | Enrichment Score: 0.28                                                                      | G                  |  | Count | P_Value | Benjamini |
| <input type="checkbox"/> | GOTERM_MF_ALL  | <a href="#">oxidoreductase activity, acting on heme group of donors, oxygen as acceptor</a> | <a href="#">RT</a> |    | 4     | 3.3E-1  | 1.0E0     |
| <input type="checkbox"/> | GOTERM_MF_ALL  | <a href="#">heme-copper terminal oxidase activity</a>                                       | <a href="#">RT</a> |    | 4     | 3.3E-1  | 1.0E0     |
| <input type="checkbox"/> | GOTERM_MF_ALL  | <a href="#">oxidoreductase activity, acting on heme group of donors</a>                     | <a href="#">RT</a> |    | 4     | 3.3E-1  | 1.0E0     |
| <input type="checkbox"/> | GOTERM_MF_ALL  | <a href="#">cytochrome-c oxidase activity</a>                                               | <a href="#">RT</a> |    | 4     | 3.3E-1  | 1.0E0     |
| <input type="checkbox"/> | GOTERM_MF_ALL  | <a href="#">hydrogen ion transmembrane transporter activity</a>                             | <a href="#">RT</a> |    | 6     | 9.3E-1  | 1.0E0     |
| <input type="checkbox"/> | GOTERM_MF_ALL  | <a href="#">monovalent inorganic cation transmembrane transporter activity</a>              | <a href="#">RT</a> |    | 6     | 9.4E-1  | 1.0E0     |
| <input type="checkbox"/> | GOTERM_MF_ALL  | <a href="#">inorganic cation transmembrane transporter activity</a>                         | <a href="#">RT</a> |    | 7     | 9.8E-1  | 1.0E0     |
| Annotation Cluster 126   |                | Enrichment Score: 0.28                                                                      | G                  |  | Count | P_Value | Benjamini |
| <input type="checkbox"/> | BIOCARTA       | <a href="#">Regulation of hematopoiesis by cytokines</a>                                    | <a href="#">RT</a> |    | 3     | 4.8E-1  | 1.0E0     |
| <input type="checkbox"/> | GOTERM_BP_ALL  | <a href="#">regulation of osteoclast differentiation</a>                                    | <a href="#">RT</a> |    | 3     | 4.8E-1  | 1.0E0     |
| <input type="checkbox"/> | BIOCARTA       | <a href="#">Cytokines and Inflammatory Response</a>                                         | <a href="#">RT</a> |    | 4     | 5.0E-1  | 1.0E0     |
| <input type="checkbox"/> | GOTERM_BP_ALL  | <a href="#">regulation of myeloid cell differentiation</a>                                  | <a href="#">RT</a> |    | 5     | 5.2E-1  | 1.0E0     |
| <input type="checkbox"/> | GOTERM_BP_ALL  | <a href="#">myeloid leukocyte differentiation</a>                                           | <a href="#">RT</a> |    | 5     | 5.7E-1  | 1.0E0     |
| <input type="checkbox"/> | GOTERM_BP_ALL  | <a href="#">regulation of myeloid leukocyte differentiation</a>                             | <a href="#">RT</a> |    | 3     | 6.0E-1  | 1.0E0     |
| <input type="checkbox"/> | GOTERM_BP_ALL  | <a href="#">osteoclast differentiation</a>                                                  | <a href="#">RT</a> |    | 3     | 6.0E-1  | 1.0E0     |
| Annotation Cluster 127   |                | Enrichment Score: 0.26                                                                      | G                  |  | Count | P_Value | Benjamini |
| <input type="checkbox"/> | GOTERM_MF_ALL  | <a href="#">cytokine binding</a>                                                            | <a href="#">RT</a> |    | 9     | 3.4E-1  | 1.0E0     |
| <input type="checkbox"/> | INTERPRO       | <a href="#">Chemokine receptor</a>                                                          | <a href="#">RT</a> |    | 3     | 3.8E-1  | 1.0E0     |
| <input type="checkbox"/> | GOTERM_MF_ALL  | <a href="#">C-C chemokine receptor activity</a>                                             | <a href="#">RT</a> |    | 3     | 4.4E-1  | 1.0E0     |
| <input type="checkbox"/> | GOTERM_MF_ALL  | <a href="#">C-C chemokine binding</a>                                                       | <a href="#">RT</a> |    | 3     | 4.4E-1  | 1.0E0     |

|                          |                 |                                                                                                         |                    |  |       |         |           |
|--------------------------|-----------------|---------------------------------------------------------------------------------------------------------|--------------------|--|-------|---------|-----------|
| <input type="checkbox"/> | GOTERM_MF_ALL   | <a href="#">chemokine receptor activity</a>                                                             | <a href="#">RT</a> |  | 3     | 5.9E-1  | 1.0E0     |
| <input type="checkbox"/> | GOTERM_MF_ALL   | <a href="#">chemokine binding</a>                                                                       | <a href="#">RT</a> |  | 3     | 6.1E-1  | 1.0E0     |
| <input type="checkbox"/> | GOTERM_MF_ALL   | <a href="#">peptide binding</a>                                                                         | <a href="#">RT</a> |  | 9     | 8.8E-1  | 1.0E0     |
| <input type="checkbox"/> | GOTERM_MF_ALL   | <a href="#">peptide receptor activity</a>                                                               | <a href="#">RT</a> |  | 6     | 9.5E-1  | 1.0E0     |
| Annotation Cluster 128   |                 | Enrichment Score: 0.26                                                                                  | <b>G</b>           |  | Count | P_Value | Benjamini |
| <input type="checkbox"/> | SP_PIR_KEYWORDS | <a href="#">protein phosphatase</a>                                                                     | <a href="#">RT</a> |  | 12    | 1.8E-1  | 9.4E-1    |
| <input type="checkbox"/> | GOTERM_MF_ALL   | <a href="#">phosphoprotein phosphatase activity</a>                                                     | <a href="#">RT</a> |  | 15    | 3.0E-1  | 1.0E0     |
| <input type="checkbox"/> | GOTERM_BP_ALL   | <a href="#">protein amino acid dephosphorylation</a>                                                    | <a href="#">RT</a> |  | 11    | 5.1E-1  | 1.0E0     |
| <input type="checkbox"/> | GOTERM_MF_ALL   | <a href="#">phosphoric ester hydrolase activity</a>                                                     | <a href="#">RT</a> |  | 24    | 5.7E-1  | 1.0E0     |
| <input type="checkbox"/> | INTERPRO        | <a href="#">Protein-tyrosine phosphatase, receptor/non-receptor type</a>                                | <a href="#">RT</a> |  | 4     | 5.9E-1  | 1.0E0     |
| <input type="checkbox"/> | SP_PIR_KEYWORDS | <a href="#">tyrosine-specific phosphatase</a>                                                           | <a href="#">RT</a> |  | 3     | 6.0E-1  | 1.0E0     |
| <input type="checkbox"/> | GOTERM_MF_ALL   | <a href="#">hydrolase activity, acting on ester bonds</a>                                               | <a href="#">RT</a> |  | 48    | 6.3E-1  | 1.0E0     |
| <input type="checkbox"/> | GOTERM_BP_ALL   | <a href="#">dephosphorylation</a>                                                                       | <a href="#">RT</a> |  | 11    | 6.7E-1  | 1.0E0     |
| <input type="checkbox"/> | SMART           | <a href="#">PTPc</a>                                                                                    | <a href="#">RT</a> |  | 4     | 6.9E-1  | 1.0E0     |
| <input type="checkbox"/> | GOTERM_MF_ALL   | <a href="#">phosphoric monoester hydrolase activity</a>                                                 | <a href="#">RT</a> |  | 18    | 6.9E-1  | 1.0E0     |
| <input type="checkbox"/> | SP_PIR_KEYWORDS | <a href="#">phosphoric monoester hydrolase</a>                                                          | <a href="#">RT</a> |  | 4     | 7.0E-1  | 1.0E0     |
| <input type="checkbox"/> | GOTERM_MF_ALL   | <a href="#">protein tyrosine phosphatase activity</a>                                                   | <a href="#">RT</a> |  | 7     | 7.0E-1  | 1.0E0     |
| <input type="checkbox"/> | INTERPRO        | <a href="#">Protein-tyrosine phosphatase, Tyr-specific/dual-specificity type</a>                        | <a href="#">RT</a> |  | 6     | 7.5E-1  | 1.0E0     |
| Annotation Cluster 129   |                 | Enrichment Score: 0.26                                                                                  | <b>G</b>           |  | Count | P_Value | Benjamini |
| <input type="checkbox"/> | UP_SEQ_FEATURE  | domain:J                                                                                                | <a href="#">RT</a> |  | 4     | 3.2E-1  | 1.0E0     |
| <input type="checkbox"/> | INTERPRO        | <a href="#">Heat shock protein DnaJ, N-terminal</a>                                                     | <a href="#">RT</a> |  | 5     | 3.9E-1  | 1.0E0     |
| <input type="checkbox"/> | GOTERM_MF_ALL   | <a href="#">heat shock protein binding</a>                                                              | <a href="#">RT</a> |  | 6     | 4.6E-1  | 1.0E0     |
| <input type="checkbox"/> | SMART           | <a href="#">DnaJ</a>                                                                                    | <a href="#">RT</a> |  | 5     | 5.6E-1  | 1.0E0     |
| <input type="checkbox"/> | SP_PIR_KEYWORDS | <a href="#">chaperone</a>                                                                               | <a href="#">RT</a> |  | 7     | 9.0E-1  | 1.0E0     |
| <input type="checkbox"/> | GOTERM_BP_ALL   | <a href="#">protein folding</a>                                                                         | <a href="#">RT</a> |  | 11    | 9.7E-1  | 1.0E0     |
| Annotation Cluster 130   |                 | Enrichment Score: 0.26                                                                                  | <b>G</b>           |  | Count | P_Value | Benjamini |
| <input type="checkbox"/> | GOTERM_BP_ALL   | <a href="#">spermatid development</a>                                                                   | <a href="#">RT</a> |  | 5     | 3.5E-1  | 1.0E0     |
| <input type="checkbox"/> | GOTERM_BP_ALL   | <a href="#">spermatid differentiation</a>                                                               | <a href="#">RT</a> |  | 5     | 3.9E-1  | 1.0E0     |
| <input type="checkbox"/> | GOTERM_BP_ALL   | <a href="#">gamete generation</a>                                                                       | <a href="#">RT</a> |  | 22    | 4.8E-1  | 1.0E0     |
| <input type="checkbox"/> | GOTERM_BP_ALL   | <a href="#">sexual reproduction</a>                                                                     | <a href="#">RT</a> |  | 25    | 5.7E-1  | 1.0E0     |
| <input type="checkbox"/> | GOTERM_BP_ALL   | <a href="#">reproduction</a>                                                                            | <a href="#">RT</a> |  | 36    | 6.2E-1  | 1.0E0     |
| <input type="checkbox"/> | GOTERM_BP_ALL   | <a href="#">male gamete generation</a>                                                                  | <a href="#">RT</a> |  | 15    | 6.6E-1  | 1.0E0     |
| <input type="checkbox"/> | GOTERM_BP_ALL   | <a href="#">spermatogenesis</a>                                                                         | <a href="#">RT</a> |  | 15    | 6.6E-1  | 1.0E0     |
| <input type="checkbox"/> | SP_PIR_KEYWORDS | <a href="#">spermatogenesis</a>                                                                         | <a href="#">RT</a> |  | 5     | 8.7E-1  | 1.0E0     |
| Annotation Cluster 131   |                 | Enrichment Score: 0.25                                                                                  | <b>G</b>           |  | Count | P_Value | Benjamini |
| <input type="checkbox"/> | GOTERM_MF_ALL   | <a href="#">deacetylase activity</a>                                                                    | <a href="#">RT</a> |  | 3     | 3.9E-1  | 1.0E0     |
| <input type="checkbox"/> | GOTERM_MF_ALL   | <a href="#">hydrolase activity, acting on carbon-nitrogen (but not peptide) bonds, in linear amides</a> | <a href="#">RT</a> |  | 5     | 5.2E-1  | 1.0E0     |
| <input type="checkbox"/> | GOTERM_MF_ALL   | <a href="#">hydrolase activity, acting on carbon-nitrogen (but not peptide) bonds</a>                   | <a href="#">RT</a> |  | 6     | 8.7E-1  | 1.0E0     |
| Annotation Cluster 132   |                 | Enrichment Score: 0.24                                                                                  | <b>G</b>           |  | Count | P_Value | Benjamini |
| <input type="checkbox"/> | GOTERM_BP_ALL   | <a href="#">histone methylation</a>                                                                     | <a href="#">RT</a> |  | 3     | 4.2E-1  | 1.0E0     |
| <input type="checkbox"/> | GOTERM_BP_ALL   | <a href="#">protein amino acid methylation</a>                                                          | <a href="#">RT</a> |  | 4     | 5.1E-1  | 1.0E0     |
| <input type="checkbox"/> | GOTERM_BP_ALL   | <a href="#">protein amino acid alkylation</a>                                                           | <a href="#">RT</a> |  | 4     | 5.1E-1  | 1.0E0     |
| <input type="checkbox"/> | GOTERM_BP_ALL   | <a href="#">biopolymer methylation</a>                                                                  | <a href="#">RT</a> |  | 5     | 6.3E-1  | 1.0E0     |
| <input type="checkbox"/> | GOTERM_BP_ALL   | <a href="#">methylation</a>                                                                             | <a href="#">RT</a> |  | 5     | 6.7E-1  | 1.0E0     |
| <input type="checkbox"/> | GOTERM_BP_ALL   | <a href="#">one-carbon compound metabolic process</a>                                                   | <a href="#">RT</a> |  | 7     | 7.4E-1  | 1.0E0     |
| Annotation Cluster 133   |                 | Enrichment Score: 0.24                                                                                  | <b>G</b>           |  | Count | P_Value | Benjamini |
| <input type="checkbox"/> | GOTERM_BP_ALL   | <a href="#">negative regulation of B cell proliferation</a>                                             | <a href="#">RT</a> |  | 3     | 1.6E-1  | 9.9E-1    |
| <input type="checkbox"/> | GOTERM_BP_ALL   | <a href="#">regulation of B cell proliferation</a>                                                      | <a href="#">RT</a> |  | 4     | 2.7E-1  | 1.0E0     |

|                          |               |                                                                           |          |  |       |         |           |
|--------------------------|---------------|---------------------------------------------------------------------------|----------|--|-------|---------|-----------|
| <input type="checkbox"/> | GOTERM_BP_ALL | <a href="#">negative regulation of B cell activation</a>                  | RT       |  | 3     | 2.7E-1  | 1.0E0     |
| <input type="checkbox"/> | GOTERM_BP_ALL | <a href="#">B cell proliferation</a>                                      | RT       |  | 4     | 4.3E-1  | 1.0E0     |
| <input type="checkbox"/> | GOTERM_BP_ALL | <a href="#">regulation of cell activation</a>                             | RT       |  | 10    | 4.9E-1  | 1.0E0     |
| <input type="checkbox"/> | GOTERM_BP_ALL | <a href="#">positive regulation of T cell proliferation</a>               | RT       |  | 4     | 5.1E-1  | 1.0E0     |
| <input type="checkbox"/> | GOTERM_BP_ALL | <a href="#">lymphocyte proliferation</a>                                  | RT       |  | 8     | 5.5E-1  | 1.0E0     |
| <input type="checkbox"/> | GOTERM_BP_ALL | <a href="#">mononuclear cell proliferation</a>                            | RT       |  | 8     | 5.5E-1  | 1.0E0     |
| <input type="checkbox"/> | GOTERM_BP_ALL | <a href="#">regulation of lymphocyte proliferation</a>                    | RT       |  | 6     | 5.8E-1  | 1.0E0     |
| <input type="checkbox"/> | GOTERM_BP_ALL | <a href="#">regulation of mononuclear cell proliferation</a>              | RT       |  | 6     | 5.8E-1  | 1.0E0     |
| <input type="checkbox"/> | GOTERM_BP_ALL | <a href="#">T cell proliferation</a>                                      | RT       |  | 6     | 5.9E-1  | 1.0E0     |
| <input type="checkbox"/> | GOTERM_BP_ALL | <a href="#">negative regulation of lymphocyte proliferation</a>           | RT       |  | 3     | 6.2E-1  | 1.0E0     |
| <input type="checkbox"/> | GOTERM_BP_ALL | <a href="#">negative regulation of mononuclear cell proliferation</a>     | RT       |  | 3     | 6.2E-1  | 1.0E0     |
| <input type="checkbox"/> | GOTERM_BP_ALL | <a href="#">positive regulation of lymphocyte proliferation</a>           | RT       |  | 4     | 6.9E-1  | 1.0E0     |
| <input type="checkbox"/> | GOTERM_BP_ALL | <a href="#">regulation of B cell activation</a>                           | RT       |  | 4     | 6.9E-1  | 1.0E0     |
| <input type="checkbox"/> | GOTERM_BP_ALL | <a href="#">positive regulation of mononuclear cell proliferation</a>     | RT       |  | 4     | 6.9E-1  | 1.0E0     |
| <input type="checkbox"/> | GOTERM_BP_ALL | <a href="#">negative regulation of lymphocyte activation</a>              | RT       |  | 3     | 7.6E-1  | 1.0E0     |
| <input type="checkbox"/> | GOTERM_BP_ALL | <a href="#">regulation of T cell proliferation</a>                        | RT       |  | 4     | 7.8E-1  | 1.0E0     |
| <input type="checkbox"/> | GOTERM_BP_ALL | <a href="#">positive regulation of T cell activation</a>                  | RT       |  | 4     | 8.0E-1  | 1.0E0     |
| <input type="checkbox"/> | GOTERM_CC_ALL | <a href="#">external side of plasma membrane</a>                          | RT       |  | 9     | 8.4E-1  | 1.0E0     |
| <input type="checkbox"/> | GOTERM_BP_ALL | <a href="#">regulation of lymphocyte activation</a>                       | RT       |  | 6     | 9.2E-1  | 1.0E0     |
| <input type="checkbox"/> | GOTERM_BP_ALL | <a href="#">positive regulation of lymphocyte activation</a>              | RT       |  | 4     | 9.3E-1  | 1.0E0     |
| <input type="checkbox"/> | GOTERM_BP_ALL | <a href="#">regulation of T cell activation</a>                           | RT       |  | 4     | 9.6E-1  | 1.0E0     |
| Annotation Cluster 134   |               | Enrichment Score: 0.24                                                    | <b>G</b> |  | Count | P_Value | Benjamini |
| <input type="checkbox"/> | GOTERM_BP_ALL | <a href="#">regulation of phosphorylation</a>                             | RT       |  | 7     | 4.7E-1  | 1.0E0     |
| <input type="checkbox"/> | GOTERM_BP_ALL | <a href="#">regulation of phosphorus metabolic process</a>                | RT       |  | 7     | 5.1E-1  | 1.0E0     |
| <input type="checkbox"/> | GOTERM_BP_ALL | <a href="#">regulation of phosphate metabolic process</a>                 | RT       |  | 7     | 5.1E-1  | 1.0E0     |
| <input type="checkbox"/> | GOTERM_BP_ALL | <a href="#">positive regulation of amine metabolic process</a>            | RT       |  | 4     | 5.1E-1  | 1.0E0     |
| <input type="checkbox"/> | GOTERM_BP_ALL | <a href="#">positive regulation of amino acid metabolic process</a>       | RT       |  | 4     | 5.1E-1  | 1.0E0     |
| <input type="checkbox"/> | GOTERM_BP_ALL | <a href="#">positive regulation of protein amino acid phosphorylation</a> | RT       |  | 4     | 5.1E-1  | 1.0E0     |
| <input type="checkbox"/> | GOTERM_BP_ALL | <a href="#">regulation of protein amino acid phosphorylation</a>          | RT       |  | 6     | 5.2E-1  | 1.0E0     |
| <input type="checkbox"/> | GOTERM_BP_ALL | <a href="#">regulation of amine metabolic process</a>                     | RT       |  | 6     | 5.3E-1  | 1.0E0     |
| <input type="checkbox"/> | GOTERM_BP_ALL | <a href="#">regulation of amino acid metabolic process</a>                | RT       |  | 6     | 5.3E-1  | 1.0E0     |
| <input type="checkbox"/> | GOTERM_BP_ALL | <a href="#">peptidyl-tyrosine modification</a>                            | RT       |  | 6     | 6.1E-1  | 1.0E0     |
| <input type="checkbox"/> | GOTERM_BP_ALL | <a href="#">peptidyl-tyrosine phosphorylation</a>                         | RT       |  | 6     | 6.1E-1  | 1.0E0     |
| <input type="checkbox"/> | GOTERM_BP_ALL | <a href="#">peptidyl-amino acid modification</a>                          | RT       |  | 10    | 6.4E-1  | 1.0E0     |
| <input type="checkbox"/> | GOTERM_BP_ALL | <a href="#">regulation of peptidyl-tyrosine phosphorylation</a>           | RT       |  | 3     | 8.5E-1  | 1.0E0     |
| <input type="checkbox"/> | GOTERM_BP_ALL | <a href="#">amino acid metabolic process</a>                              | RT       |  | 14    | 9.8E-1  | 1.0E0     |
| Annotation Cluster 135   |               | Enrichment Score: 0.24                                                    | <b>G</b> |  | Count | P_Value | Benjamini |
| <input type="checkbox"/> | GOTERM_BP_ALL | <a href="#">cytokine production</a>                                       | RT       |  | 13    | 2.1E-1  | 1.0E0     |
| <input type="checkbox"/> | GOTERM_BP_ALL | <a href="#">regulation of cellular biosynthetic process</a>               | RT       |  | 16    | 3.2E-1  | 1.0E0     |
| <input type="checkbox"/> | GOTERM_BP_ALL | <a href="#">regulation of biosynthetic process</a>                        | RT       |  | 17    | 3.9E-1  | 1.0E0     |
| <input type="checkbox"/> | GOTERM_BP_ALL | <a href="#">interleukin-2 biosynthetic process</a>                        | RT       |  | 3     | 4.2E-1  | 1.0E0     |
| <input type="checkbox"/> | GOTERM_BP_ALL | <a href="#">positive regulation of translation</a>                        | RT       |  | 6     | 4.3E-1  | 1.0E0     |
| <input type="checkbox"/> | GOTERM_BP_ALL | <a href="#">regulation of translation</a>                                 | RT       |  | 14    | 4.4E-1  | 1.0E0     |
| <input type="checkbox"/> | GOTERM_BP_ALL | <a href="#">interleukin-2 production</a>                                  | RT       |  | 3     | 4.5E-1  | 1.0E0     |
| <input type="checkbox"/> | GOTERM_BP_ALL | <a href="#">positive regulation of cellular biosynthetic</a>              | RT       |  | 6     | 4.9E-1  | 1.0E0     |

| <input type="checkbox"/> |                        | <a href="#">process</a>                                                                              | <a href="#">RT</a> |  |  |    |        |         |           |  |
|--------------------------|------------------------|------------------------------------------------------------------------------------------------------|--------------------|--|--|----|--------|---------|-----------|--|
| <input type="checkbox"/> | GOTERM_BP_ALL          | <a href="#">cytokine metabolic process</a>                                                           | <a href="#">RT</a> |  |  | 7  | 5.9E-1 | 1.0E0   |           |  |
| <input type="checkbox"/> | GOTERM_BP_ALL          | <a href="#">cytokine biosynthetic process</a>                                                        | <a href="#">RT</a> |  |  | 7  | 5.9E-1 | 1.0E0   |           |  |
| <input type="checkbox"/> | GOTERM_BP_ALL          | <a href="#">positive regulation of protein metabolic process</a>                                     | <a href="#">RT</a> |  |  | 8  | 6.4E-1 | 1.0E0   |           |  |
| <input type="checkbox"/> | GOTERM_BP_ALL          | <a href="#">positive regulation of biosynthetic process</a>                                          | <a href="#">RT</a> |  |  | 6  | 6.6E-1 | 1.0E0   |           |  |
| <input type="checkbox"/> | GOTERM_BP_ALL          | <a href="#">positive regulation of cytokine biosynthetic process</a>                                 | <a href="#">RT</a> |  |  | 4  | 7.3E-1 | 1.0E0   |           |  |
| <input type="checkbox"/> | GOTERM_BP_ALL          | <a href="#">regulation of protein metabolic process</a>                                              | <a href="#">RT</a> |  |  | 20 | 8.0E-1 | 1.0E0   |           |  |
| <input type="checkbox"/> | GOTERM_BP_ALL          | <a href="#">regulation of cytokine biosynthetic process</a>                                          | <a href="#">RT</a> |  |  | 5  | 8.1E-1 | 1.0E0   |           |  |
| <input type="checkbox"/> | GOTERM_BP_ALL          | <a href="#">biosynthetic process</a>                                                                 | <a href="#">RT</a> |  |  | 83 | 9.8E-1 | 1.0E0   |           |  |
| <input type="checkbox"/> | GOTERM_BP_ALL          | <a href="#">macromolecule biosynthetic process</a>                                                   | <a href="#">RT</a> |  |  | 42 | 9.9E-1 | 1.0E0   |           |  |
| <input type="checkbox"/> | GOTERM_BP_ALL          | <a href="#">translation</a>                                                                          | <a href="#">RT</a> |  |  | 23 | 1.0E0  | 1.0E0   |           |  |
| <input type="checkbox"/> | GOTERM_BP_ALL          | <a href="#">cellular biosynthetic process</a>                                                        | <a href="#">RT</a> |  |  | 54 | 1.0E0  | 1.0E0   |           |  |
|                          | Annotation Cluster 136 | Enrichment Score: 0.24                                                                               | <b>G</b>           |  |  |    | Count  | P_Value | Benjamini |  |
| <input type="checkbox"/> | GOTERM_BP_ALL          | <a href="#">mRNA splice site selection</a>                                                           | <a href="#">RT</a> |  |  | 3  | 3.3E-1 | 1.0E0   |           |  |
| <input type="checkbox"/> | GOTERM_BP_ALL          | <a href="#">nuclear mRNA splicing, via spliceosome</a>                                               | <a href="#">RT</a> |  |  | 6  | 4.6E-1 | 1.0E0   |           |  |
| <input type="checkbox"/> | GOTERM_BP_ALL          | <a href="#">RNA splicing, via transesterification reactions</a>                                      | <a href="#">RT</a> |  |  | 6  | 4.6E-1 | 1.0E0   |           |  |
| <input type="checkbox"/> | GOTERM_BP_ALL          | <a href="#">RNA splicing, via transesterification reactions with bulged adenosine as nucleophile</a> | <a href="#">RT</a> |  |  | 6  | 4.6E-1 | 1.0E0   |           |  |
| <input type="checkbox"/> | GOTERM_BP_ALL          | <a href="#">regulation of translational initiation</a>                                               | <a href="#">RT</a> |  |  | 3  | 5.0E-1 | 1.0E0   |           |  |
| <input type="checkbox"/> | GOTERM_BP_ALL          | <a href="#">spliceosome assembly</a>                                                                 | <a href="#">RT</a> |  |  | 3  | 6.0E-1 | 1.0E0   |           |  |
| <input type="checkbox"/> | GOTERM_BP_ALL          | <a href="#">protein-RNA complex assembly</a>                                                         | <a href="#">RT</a> |  |  | 6  | 8.2E-1 | 1.0E0   |           |  |
| <input type="checkbox"/> | GOTERM_BP_ALL          | <a href="#">translational initiation</a>                                                             | <a href="#">RT</a> |  |  | 3  | 9.4E-1 | 1.0E0   |           |  |
| <input type="checkbox"/> | GOTERM_BP_ALL          | <a href="#">ribonucleoprotein complex biogenesis and assembly</a>                                    | <a href="#">RT</a> |  |  | 7  | 1.0E0  | 1.0E0   |           |  |
|                          | Annotation Cluster 137 | Enrichment Score: 0.22                                                                               | <b>G</b>           |  |  |    | Count  | P_Value | Benjamini |  |
| <input type="checkbox"/> | GOTERM_CC_ALL          | <a href="#">cell projection part</a>                                                                 | <a href="#">RT</a> |  |  | 8  | 2.8E-1 | 1.0E0   |           |  |
| <input type="checkbox"/> | GOTERM_CC_ALL          | <a href="#">neuron projection</a>                                                                    | <a href="#">RT</a> |  |  | 8  | 8.8E-1 | 1.0E0   |           |  |
| <input type="checkbox"/> | GOTERM_CC_ALL          | <a href="#">dendrite</a>                                                                             | <a href="#">RT</a> |  |  | 3  | 9.2E-1 | 1.0E0   |           |  |
|                          | Annotation Cluster 138 | Enrichment Score: 0.22                                                                               | <b>G</b>           |  |  |    | Count  | P_Value | Benjamini |  |
| <input type="checkbox"/> | UP_SEQ_FEATURE         | domain:Ras-associating                                                                               | <a href="#">RT</a> |  |  | 3  | 3.3E-1 | 1.0E0   |           |  |
| <input type="checkbox"/> | INTERPRO               | <a href="#">Ras-association</a>                                                                      | <a href="#">RT</a> |  |  | 3  | 7.8E-1 | 1.0E0   |           |  |
| <input type="checkbox"/> | SMART                  | <a href="#">RA</a>                                                                                   | <a href="#">RT</a> |  |  | 3  | 8.6E-1 | 1.0E0   |           |  |
|                          | Annotation Cluster 139 | Enrichment Score: 0.21                                                                               | <b>G</b>           |  |  |    | Count  | P_Value | Benjamini |  |
| <input type="checkbox"/> | GOTERM_BP_ALL          | <a href="#">mesenchymal cell development</a>                                                         | <a href="#">RT</a> |  |  | 5  | 4.8E-1 | 1.0E0   |           |  |
| <input type="checkbox"/> | GOTERM_BP_ALL          | <a href="#">mesenchymal cell differentiation</a>                                                     | <a href="#">RT</a> |  |  | 5  | 4.8E-1 | 1.0E0   |           |  |
| <input type="checkbox"/> | GOTERM_BP_ALL          | <a href="#">neural crest cell development</a>                                                        | <a href="#">RT</a> |  |  | 3  | 7.8E-1 | 1.0E0   |           |  |
| <input type="checkbox"/> | GOTERM_BP_ALL          | <a href="#">neural crest cell differentiation</a>                                                    | <a href="#">RT</a> |  |  | 3  | 7.8E-1 | 1.0E0   |           |  |
|                          | Annotation Cluster 140 | Enrichment Score: 0.21                                                                               | <b>G</b>           |  |  |    | Count  | P_Value | Benjamini |  |
| <input type="checkbox"/> | GOTERM_BP_ALL          | <a href="#">embryonic pattern specification</a>                                                      | <a href="#">RT</a> |  |  | 6  | 3.6E-1 | 1.0E0   |           |  |
| <input type="checkbox"/> | GOTERM_BP_ALL          | <a href="#">patterning of blood vessels</a>                                                          | <a href="#">RT</a> |  |  | 3  | 6.2E-1 | 1.0E0   |           |  |
| <input type="checkbox"/> | GOTERM_BP_ALL          | <a href="#">branching morphogenesis of a tube</a>                                                    | <a href="#">RT</a> |  |  | 5  | 7.7E-1 | 1.0E0   |           |  |
| <input type="checkbox"/> | GOTERM_BP_ALL          | <a href="#">morphogenesis of a branching structure</a>                                               | <a href="#">RT</a> |  |  | 5  | 8.1E-1 | 1.0E0   |           |  |
|                          | Annotation Cluster 141 | Enrichment Score: 0.21                                                                               | <b>G</b>           |  |  |    | Count  | P_Value | Benjamini |  |
| <input type="checkbox"/> | GOTERM_MF_ALL          | <a href="#">cytokine binding</a>                                                                     | <a href="#">RT</a> |  |  | 9  | 3.4E-1 | 1.0E0   |           |  |
| <input type="checkbox"/> | GOTERM_MF_ALL          | <a href="#">interleukin receptor activity</a>                                                        | <a href="#">RT</a> |  |  | 3  | 8.0E-1 | 1.0E0   |           |  |
| <input type="checkbox"/> | GOTERM_MF_ALL          | <a href="#">interleukin binding</a>                                                                  | <a href="#">RT</a> |  |  | 3  | 8.7E-1 | 1.0E0   |           |  |
|                          | Annotation Cluster 142 | Enrichment Score: 0.2                                                                                | <b>G</b>           |  |  |    | Count  | P_Value | Benjamini |  |
| <input type="checkbox"/> | GOTERM_BP_ALL          | <a href="#">negative regulation of biosynthetic process</a>                                          | <a href="#">RT</a> |  |  | 5  | 4.3E-1 | 1.0E0   |           |  |
| <input type="checkbox"/> | GOTERM_BP_ALL          | <a href="#">negative regulation of cellular biosynthetic process</a>                                 | <a href="#">RT</a> |  |  | 4  | 5.1E-1 | 1.0E0   |           |  |



| <input type="checkbox"/> |                        |                                                                     |    |  |  |  |  |       |         |           |  |
|--------------------------|------------------------|---------------------------------------------------------------------|----|--|--|--|--|-------|---------|-----------|--|
| <input type="checkbox"/> | GOTERM_BP_ALL          | <a href="#">negative regulation of translation</a>                  | RT |  |  |  |  | 3     | 7.2E-1  | 1.0E0     |  |
| <input type="checkbox"/> | GOTERM_BP_ALL          | <a href="#">negative regulation of protein metabolic process</a>    | RT |  |  |  |  | 4     | 9.7E-1  | 1.0E0     |  |
|                          | Annotation Cluster 143 | Enrichment Score: 0.2                                               | G  |  |  |  |  | Count | P_Value | Benjamini |  |
| <input type="checkbox"/> | GOTERM_CC_ALL          | <a href="#">nuclear chromosome part</a>                             | RT |  |  |  |  | 7     | 4.8E-1  | 1.0E0     |  |
| <input type="checkbox"/> | GOTERM_CC_ALL          | <a href="#">condensed chromosome</a>                                | RT |  |  |  |  | 5     | 6.2E-1  | 1.0E0     |  |
| <input type="checkbox"/> | GOTERM_CC_ALL          | <a href="#">nuclear chromosome</a>                                  | RT |  |  |  |  | 7     | 6.7E-1  | 1.0E0     |  |
| <input type="checkbox"/> | GOTERM_CC_ALL          | <a href="#">nuclear chromatin</a>                                   | RT |  |  |  |  | 3     | 6.7E-1  | 1.0E0     |  |
| <input type="checkbox"/> | GOTERM_CC_ALL          | <a href="#">condensed nuclear chromosome</a>                        | RT |  |  |  |  | 3     | 7.7E-1  | 1.0E0     |  |
|                          | Annotation Cluster 144 | Enrichment Score: 0.2                                               | G  |  |  |  |  | Count | P_Value | Benjamini |  |
| <input type="checkbox"/> | UP_SEQ_FEATURE         | domain:PDZ                                                          | RT |  |  |  |  | 6     | 5.0E-1  | 1.0E0     |  |
| <input type="checkbox"/> | INTERPRO               | <a href="#">PDZ/DHR/GLGF</a>                                        | RT |  |  |  |  | 10    | 6.2E-1  | 1.0E0     |  |
| <input type="checkbox"/> | SMART                  | <a href="#">PDZ</a>                                                 | RT |  |  |  |  | 10    | 8.3E-1  | 1.0E0     |  |
|                          | Annotation Cluster 145 | Enrichment Score: 0.19                                              | G  |  |  |  |  | Count | P_Value | Benjamini |  |
| <input type="checkbox"/> | GOTERM_MF_ALL          | <a href="#">cysteine-type peptidase activity</a>                    | RT |  |  |  |  | 18    | 1.4E-1  | 1.0E0     |  |
| <input type="checkbox"/> | GOTERM_BP_ALL          | <a href="#">proteolysis</a>                                         | RT |  |  |  |  | 49    | 9.0E-1  | 1.0E0     |  |
| <input type="checkbox"/> | GOTERM_MF_ALL          | <a href="#">peptidase activity</a>                                  | RT |  |  |  |  | 45    | 9.2E-1  | 1.0E0     |  |
| <input type="checkbox"/> | GOTERM_MF_ALL          | <a href="#">endopeptidase activity</a>                              | RT |  |  |  |  | 27    | 9.5E-1  | 1.0E0     |  |
| <input type="checkbox"/> | SP_PIR_KEYWORDS        | <a href="#">protease</a>                                            | RT |  |  |  |  | 27    | 9.7E-1  | 1.0E0     |  |
|                          | Annotation Cluster 146 | Enrichment Score: 0.19                                              | G  |  |  |  |  | Count | P_Value | Benjamini |  |
| <input type="checkbox"/> | GOTERM_BP_ALL          | <a href="#">regulation of cell differentiation</a>                  | RT |  |  |  |  | 16    | 5.3E-1  | 1.0E0     |  |
| <input type="checkbox"/> | GOTERM_BP_ALL          | <a href="#">positive regulation of developmental process</a>        | RT |  |  |  |  | 8     | 5.6E-1  | 1.0E0     |  |
| <input type="checkbox"/> | GOTERM_BP_ALL          | <a href="#">negative regulation of cell differentiation</a>         | RT |  |  |  |  | 8     | 6.5E-1  | 1.0E0     |  |
| <input type="checkbox"/> | GOTERM_BP_ALL          | <a href="#">regulation of developmental process</a>                 | RT |  |  |  |  | 23    | 7.1E-1  | 1.0E0     |  |
| <input type="checkbox"/> | GOTERM_BP_ALL          | <a href="#">negative regulation of developmental process</a>        | RT |  |  |  |  | 8     | 8.3E-1  | 1.0E0     |  |
|                          | Annotation Cluster 147 | Enrichment Score: 0.18                                              | G  |  |  |  |  | Count | P_Value | Benjamini |  |
| <input type="checkbox"/> | GOTERM_BP_ALL          | <a href="#">neuromuscular junction development</a>                  | RT |  |  |  |  | 3     | 4.8E-1  | 1.0E0     |  |
| <input type="checkbox"/> | GOTERM_BP_ALL          | <a href="#">synapse organization and biogenesis</a>                 | RT |  |  |  |  | 4     | 7.7E-1  | 1.0E0     |  |
| <input type="checkbox"/> | GOTERM_BP_ALL          | <a href="#">extracellular structure organization and biogenesis</a> | RT |  |  |  |  | 8     | 7.9E-1  | 1.0E0     |  |
|                          | Annotation Cluster 148 | Enrichment Score: 0.18                                              | G  |  |  |  |  | Count | P_Value | Benjamini |  |
| <input type="checkbox"/> | GOTERM_BP_ALL          | <a href="#">meiosis I</a>                                           | RT |  |  |  |  | 4     | 3.8E-1  | 1.0E0     |  |
| <input type="checkbox"/> | GOTERM_BP_ALL          | <a href="#">meiosis</a>                                             | RT |  |  |  |  | 8     | 4.1E-1  | 1.0E0     |  |
| <input type="checkbox"/> | GOTERM_BP_ALL          | <a href="#">M phase of meiotic cell cycle</a>                       | RT |  |  |  |  | 8     | 4.1E-1  | 1.0E0     |  |
| <input type="checkbox"/> | GOTERM_BP_ALL          | <a href="#">meiotic cell cycle</a>                                  | RT |  |  |  |  | 8     | 4.2E-1  | 1.0E0     |  |
| <input type="checkbox"/> | SP_PIR_KEYWORDS        | <a href="#">Meiosis</a>                                             | RT |  |  |  |  | 3     | 6.8E-1  | 1.0E0     |  |
| <input type="checkbox"/> | GOTERM_BP_ALL          | <a href="#">cell cycle phase</a>                                    | RT |  |  |  |  | 22    | 7.2E-1  | 1.0E0     |  |
| <input type="checkbox"/> | GOTERM_BP_ALL          | <a href="#">mitotic cell cycle</a>                                  | RT |  |  |  |  | 18    | 7.8E-1  | 1.0E0     |  |
| <input type="checkbox"/> | SP_PIR_KEYWORDS        | <a href="#">mitosis</a>                                             | RT |  |  |  |  | 8     | 8.3E-1  | 1.0E0     |  |
| <input type="checkbox"/> | GOTERM_BP_ALL          | <a href="#">M phase</a>                                             | RT |  |  |  |  | 17    | 8.3E-1  | 1.0E0     |  |
| <input type="checkbox"/> | GOTERM_BP_ALL          | <a href="#">mitosis</a>                                             | RT |  |  |  |  | 12    | 8.8E-1  | 1.0E0     |  |
| <input type="checkbox"/> | GOTERM_BP_ALL          | <a href="#">M phase of mitotic cell cycle</a>                       | RT |  |  |  |  | 12    | 8.8E-1  | 1.0E0     |  |
| <input type="checkbox"/> | GOTERM_BP_ALL          | <a href="#">cell division</a>                                       | RT |  |  |  |  | 13    | 9.8E-1  | 1.0E0     |  |
| <input type="checkbox"/> | SP_PIR_KEYWORDS        | <a href="#">cell division</a>                                       | RT |  |  |  |  | 9     | 9.8E-1  | 1.0E0     |  |
|                          | Annotation Cluster 149 | Enrichment Score: 0.18                                              | G  |  |  |  |  | Count | P_Value | Benjamini |  |
| <input type="checkbox"/> | GOTERM_BP_ALL          | <a href="#">antigen processing and presentation</a>                 | RT |  |  |  |  | 9     | 2.6E-1  | 1.0E0     |  |
| <input type="checkbox"/> | PIR_SUPERFAMILY        | PIRSF001990:class I histocompatibility antigen                      | RT |  |  |  |  | 3     | 5.0E-1  | 1.0E0     |  |
| <input type="checkbox"/> | INTERPRO               | <a href="#">MHC class I-like antigen recognition</a>                | RT |  |  |  |  | 4     | 5.5E-1  | 1.0E0     |  |
| <input type="checkbox"/> | KEGG_PATHWAY           | <a href="#">Type I diabetes mellitus</a>                            | RT |  |  |  |  | 5     | 6.6E-1  | 9.8E-1    |  |
| <input type="checkbox"/> | GOTERM_CC_ALL          | <a href="#">MHC protein complex</a>                                 | RT |  |  |  |  | 3     | 8.5E-1  | 1.0E0     |  |
| <input type="checkbox"/> | INTERPRO               | <a href="#">Immunoglobulin/major histocompatibility</a>             | RT |  |  |  |  | 5     | 9.7E-1  | 1.0E0     |  |

| <input type="checkbox"/> |                        | <a href="#">complex motif</a>                                                                                                | <a href="#">RT</a> |  |  |  |  |       |                   |
|--------------------------|------------------------|------------------------------------------------------------------------------------------------------------------------------|--------------------|--|--|--|--|-------|-------------------|
| <input type="checkbox"/> | INTERPRO               | <a href="#">Immunoglobulin C1-set</a>                                                                                        | <a href="#">RT</a> |  |  |  |  | 4     | 8.9E-1 1.0E0      |
| <input type="checkbox"/> | KEGG_PATHWAY           | <a href="#">Cell adhesion molecules (CAMs)</a>                                                                               | <a href="#">RT</a> |  |  |  |  | 8     | 9.0E-1 1.0E0      |
| <input type="checkbox"/> | SMART                  | <a href="#">IGc1</a>                                                                                                         | <a href="#">RT</a> |  |  |  |  | 4     | 9.4E-1 1.0E0      |
|                          | Annotation Cluster 150 | Enrichment Score: 0.17                                                                                                       | <b>G</b>           |  |  |  |  | Count | P_Value Benjamini |
| <input type="checkbox"/> | GOTERM_BP_ALL          | <a href="#">protein amino acid lipidation</a>                                                                                | <a href="#">RT</a> |  |  |  |  | 5     | 5.8E-1 1.0E0      |
| <input type="checkbox"/> | GOTERM_BP_ALL          | <a href="#">lipoprotein biosynthetic process</a>                                                                             | <a href="#">RT</a> |  |  |  |  | 5     | 6.3E-1 1.0E0      |
| <input type="checkbox"/> | GOTERM_BP_ALL          | <a href="#">lipoprotein metabolic process</a>                                                                                | <a href="#">RT</a> |  |  |  |  | 5     | 8.4E-1 1.0E0      |
|                          | Annotation Cluster 151 | Enrichment Score: 0.17                                                                                                       | <b>G</b>           |  |  |  |  | Count | P_Value Benjamini |
| <input type="checkbox"/> | INTERPRO               | <a href="#">Guanylate kinase/L-type calcium channel region</a>                                                               | <a href="#">RT</a> |  |  |  |  | 3     | 5.6E-1 1.0E0      |
| <input type="checkbox"/> | SMART                  | <a href="#">GuKc</a>                                                                                                         | <a href="#">RT</a> |  |  |  |  | 3     | 6.4E-1 1.0E0      |
| <input type="checkbox"/> | UP_SEQ_FEATURE         | domain:SH3                                                                                                                   | <a href="#">RT</a> |  |  |  |  | 7     | 8.6E-1 1.0E0      |
|                          | Annotation Cluster 152 | Enrichment Score: 0.17                                                                                                       | <b>G</b>           |  |  |  |  | Count | P_Value Benjamini |
| <input type="checkbox"/> | GOTERM_MF_ALL          | <a href="#">exopeptidase activity</a>                                                                                        | <a href="#">RT</a> |  |  |  |  | 9     | 5.1E-1 1.0E0      |
| <input type="checkbox"/> | GOTERM_MF_ALL          | <a href="#">carboxypeptidase A activity</a>                                                                                  | <a href="#">RT</a> |  |  |  |  | 3     | 6.5E-1 1.0E0      |
| <input type="checkbox"/> | GOTERM_MF_ALL          | <a href="#">metalloexopeptidase activity</a>                                                                                 | <a href="#">RT</a> |  |  |  |  | 5     | 6.7E-1 1.0E0      |
| <input type="checkbox"/> | GOTERM_MF_ALL          | <a href="#">metallocarboxypeptidase activity</a>                                                                             | <a href="#">RT</a> |  |  |  |  | 3     | 7.2E-1 1.0E0      |
| <input type="checkbox"/> | GOTERM_MF_ALL          | <a href="#">carboxypeptidase activity</a>                                                                                    | <a href="#">RT</a> |  |  |  |  | 3     | 8.8E-1 1.0E0      |
|                          | Annotation Cluster 153 | Enrichment Score: 0.17                                                                                                       | <b>G</b>           |  |  |  |  | Count | P_Value Benjamini |
| <input type="checkbox"/> | SP_PIR_KEYWORDS        | <a href="#">Endonuclease</a>                                                                                                 | <a href="#">RT</a> |  |  |  |  | 6     | 3.4E-1 9.9E-1     |
| <input type="checkbox"/> | GOTERM_MF_ALL          | <a href="#">endoribonuclease activity, producing 5'-phosphomonoesters</a>                                                    | <a href="#">RT</a> |  |  |  |  | 3     | 5.4E-1 1.0E0      |
| <input type="checkbox"/> | GOTERM_MF_ALL          | <a href="#">endonuclease activity, active with either ribo- or deoxyribonucleic acids and producing 5'-phosphomonoesters</a> | <a href="#">RT</a> |  |  |  |  | 3     | 5.9E-1 1.0E0      |
| <input type="checkbox"/> | SP_PIR_KEYWORDS        | <a href="#">nuclease</a>                                                                                                     | <a href="#">RT</a> |  |  |  |  | 6     | 6.9E-1 1.0E0      |
| <input type="checkbox"/> | GOTERM_MF_ALL          | <a href="#">endonuclease activity</a>                                                                                        | <a href="#">RT</a> |  |  |  |  | 6     | 8.2E-1 1.0E0      |
| <input type="checkbox"/> | GOTERM_MF_ALL          | <a href="#">endoribonuclease activity</a>                                                                                    | <a href="#">RT</a> |  |  |  |  | 3     | 8.5E-1 1.0E0      |
| <input type="checkbox"/> | GOTERM_MF_ALL          | <a href="#">nuclease activity</a>                                                                                            | <a href="#">RT</a> |  |  |  |  | 9     | 8.9E-1 1.0E0      |
| <input type="checkbox"/> | GOTERM_MF_ALL          | <a href="#">ribonuclease activity</a>                                                                                        | <a href="#">RT</a> |  |  |  |  | 3     | 9.6E-1 1.0E0      |
|                          | Annotation Cluster 154 | Enrichment Score: 0.16                                                                                                       | <b>G</b>           |  |  |  |  | Count | P_Value Benjamini |
| <input type="checkbox"/> | GOTERM_BP_ALL          | <a href="#">homeostatic process</a>                                                                                          | <a href="#">RT</a> |  |  |  |  | 34    | 2.5E-1 1.0E0      |
| <input type="checkbox"/> | GOTERM_BP_ALL          | <a href="#">cation homeostasis</a>                                                                                           | <a href="#">RT</a> |  |  |  |  | 11    | 5.1E-1 1.0E0      |
| <input type="checkbox"/> | GOTERM_BP_ALL          | <a href="#">cellular homeostasis</a>                                                                                         | <a href="#">RT</a> |  |  |  |  | 21    | 5.5E-1 1.0E0      |
| <input type="checkbox"/> | GOTERM_BP_ALL          | <a href="#">cellular iron ion homeostasis</a>                                                                                | <a href="#">RT</a> |  |  |  |  | 3     | 5.8E-1 1.0E0      |
| <input type="checkbox"/> | GOTERM_BP_ALL          | <a href="#">iron ion homeostasis</a>                                                                                         | <a href="#">RT</a> |  |  |  |  | 3     | 5.8E-1 1.0E0      |
| <input type="checkbox"/> | GOTERM_BP_ALL          | <a href="#">cellular cation homeostasis</a>                                                                                  | <a href="#">RT</a> |  |  |  |  | 10    | 6.2E-1 1.0E0      |
| <input type="checkbox"/> | GOTERM_BP_ALL          | <a href="#">di-, tri-valent inorganic cation homeostasis</a>                                                                 | <a href="#">RT</a> |  |  |  |  | 9     | 6.4E-1 1.0E0      |
| <input type="checkbox"/> | GOTERM_BP_ALL          | <a href="#">cellular di-, tri-valent inorganic cation homeostasis</a>                                                        | <a href="#">RT</a> |  |  |  |  | 8     | 7.4E-1 1.0E0      |
| <input type="checkbox"/> | GOTERM_BP_ALL          | <a href="#">cellular chemical homeostasis</a>                                                                                | <a href="#">RT</a> |  |  |  |  | 12    | 8.4E-1 1.0E0      |
| <input type="checkbox"/> | GOTERM_BP_ALL          | <a href="#">cellular ion homeostasis</a>                                                                                     | <a href="#">RT</a> |  |  |  |  | 12    | 8.4E-1 1.0E0      |
| <input type="checkbox"/> | GOTERM_BP_ALL          | <a href="#">ion homeostasis</a>                                                                                              | <a href="#">RT</a> |  |  |  |  | 13    | 8.6E-1 1.0E0      |
| <input type="checkbox"/> | GOTERM_BP_ALL          | <a href="#">chemical homeostasis</a>                                                                                         | <a href="#">RT</a> |  |  |  |  | 15    | 9.1E-1 1.0E0      |
| <input type="checkbox"/> | GOTERM_BP_ALL          | <a href="#">cellular metal ion homeostasis</a>                                                                               | <a href="#">RT</a> |  |  |  |  | 4     | 9.5E-1 1.0E0      |
| <input type="checkbox"/> | GOTERM_BP_ALL          | <a href="#">metal ion homeostasis</a>                                                                                        | <a href="#">RT</a> |  |  |  |  | 4     | 9.6E-1 1.0E0      |
| <input type="checkbox"/> | GOTERM_BP_ALL          | <a href="#">cellular calcium ion homeostasis</a>                                                                             | <a href="#">RT</a> |  |  |  |  | 3     | 9.8E-1 1.0E0      |
| <input type="checkbox"/> | GOTERM_BP_ALL          | <a href="#">calcium ion homeostasis</a>                                                                                      | <a href="#">RT</a> |  |  |  |  | 3     | 9.8E-1 1.0E0      |
|                          | Annotation Cluster 155 | Enrichment Score: 0.15                                                                                                       | <b>G</b>           |  |  |  |  | Count | P_Value Benjamini |
| <input type="checkbox"/> | GOTERM_BP_ALL          | <a href="#">embryonic appendage morphogenesis</a>                                                                            | <a href="#">RT</a> |  |  |  |  | 6     | 6.3E-1 1.0E0      |
| <input type="checkbox"/> | GOTERM_BP_ALL          | <a href="#">embryonic limb morphogenesis</a>                                                                                 | <a href="#">RT</a> |  |  |  |  | 6     | 6.3E-1 1.0E0      |
| <input type="checkbox"/> | GOTERM_BP_ALL          | <a href="#">appendage morphogenesis</a>                                                                                      | <a href="#">RT</a> |  |  |  |  | 6     | 6.9E-1 1.0E0      |

| <input type="checkbox"/> |                        |                                                                                                                       |                    |  |  |       |         |           |  |
|--------------------------|------------------------|-----------------------------------------------------------------------------------------------------------------------|--------------------|--|--|-------|---------|-----------|--|
| <input type="checkbox"/> | GOTERM_BP_ALL          | <a href="#">limb morphogenesis</a>                                                                                    | <a href="#">RT</a> |  |  | 6     | 6.9E-1  | 1.0E0     |  |
| <input type="checkbox"/> | GOTERM_BP_ALL          | <a href="#">limb development</a>                                                                                      | <a href="#">RT</a> |  |  | 6     | 7.2E-1  | 1.0E0     |  |
| <input type="checkbox"/> | GOTERM_BP_ALL          | <a href="#">appendage development</a>                                                                                 | <a href="#">RT</a> |  |  | 6     | 7.2E-1  | 1.0E0     |  |
| <input type="checkbox"/> | GOTERM_BP_ALL          | <a href="#">embryonic morphogenesis</a>                                                                               | <a href="#">RT</a> |  |  | 13    | 8.4E-1  | 1.0E0     |  |
|                          | Annotation Cluster 156 | Enrichment Score: 0.15                                                                                                | <b>G</b>           |  |  | Count | P_Value | Benjamini |  |
| <input type="checkbox"/> | INTERPRO               | <a href="#">Src homology-3</a>                                                                                        | <a href="#">RT</a> |  |  | 15    | 5.7E-1  | 1.0E0     |  |
| <input type="checkbox"/> | SP_PIR_KEYWORDS        | <a href="#">SH3 domain</a>                                                                                            | <a href="#">RT</a> |  |  | 15    | 6.1E-1  | 1.0E0     |  |
| <input type="checkbox"/> | SMART                  | <a href="#">SH3</a>                                                                                                   | <a href="#">RT</a> |  |  | 15    | 8.3E-1  | 1.0E0     |  |
| <input type="checkbox"/> | UP_SEQ_FEATURE         | domain:SH3                                                                                                            | <a href="#">RT</a> |  |  | 7     | 8.6E-1  | 1.0E0     |  |
|                          | Annotation Cluster 157 | Enrichment Score: 0.15                                                                                                | <b>G</b>           |  |  | Count | P_Value | Benjamini |  |
| <input type="checkbox"/> | UP_SEQ_FEATURE         | calcium-binding region:2                                                                                              | <a href="#">RT</a> |  |  | 7     | 5.1E-1  | 1.0E0     |  |
| <input type="checkbox"/> | UP_SEQ_FEATURE         | calcium-binding region:1                                                                                              | <a href="#">RT</a> |  |  | 7     | 5.5E-1  | 1.0E0     |  |
| <input type="checkbox"/> | INTERPRO               | <a href="#">Calcium-binding EF-hand</a>                                                                               | <a href="#">RT</a> |  |  | 15    | 5.5E-1  | 1.0E0     |  |
| <input type="checkbox"/> | INTERPRO               | <a href="#">EF-Hand type</a>                                                                                          | <a href="#">RT</a> |  |  | 12    | 7.8E-1  | 1.0E0     |  |
| <input type="checkbox"/> | UP_SEQ_FEATURE         | domain:EF-hand 1                                                                                                      | <a href="#">RT</a> |  |  | 7     | 8.0E-1  | 1.0E0     |  |
| <input type="checkbox"/> | UP_SEQ_FEATURE         | domain:EF-hand 2                                                                                                      | <a href="#">RT</a> |  |  | 7     | 8.1E-1  | 1.0E0     |  |
| <input type="checkbox"/> | SMART                  | <a href="#">EFh</a>                                                                                                   | <a href="#">RT</a> |  |  | 15    | 8.3E-1  | 1.0E0     |  |
| <input type="checkbox"/> | UP_SEQ_FEATURE         | domain:EF-hand 3                                                                                                      | <a href="#">RT</a> |  |  | 3     | 9.4E-1  | 1.0E0     |  |
|                          | Annotation Cluster 158 | Enrichment Score: 0.15                                                                                                | <b>G</b>           |  |  | Count | P_Value | Benjamini |  |
| <input type="checkbox"/> | SP_PIR_KEYWORDS        | <a href="#">aminotransferase</a>                                                                                      | <a href="#">RT</a> |  |  | 3     | 5.3E-1  | 1.0E0     |  |
| <input type="checkbox"/> | GOTERM_MF_ALL          | <a href="#">transaminase activity</a>                                                                                 | <a href="#">RT</a> |  |  | 3     | 8.0E-1  | 1.0E0     |  |
| <input type="checkbox"/> | GOTERM_MF_ALL          | <a href="#">transferase activity, transferring nitrogenous groups</a>                                                 | <a href="#">RT</a> |  |  | 3     | 8.3E-1  | 1.0E0     |  |
|                          | Annotation Cluster 159 | Enrichment Score: 0.15                                                                                                | <b>G</b>           |  |  | Count | P_Value | Benjamini |  |
| <input type="checkbox"/> | GOTERM_BP_ALL          | <a href="#">regulation of blood pressure</a>                                                                          | <a href="#">RT</a> |  |  | 5     | 6.4E-1  | 1.0E0     |  |
| <input type="checkbox"/> | GOTERM_BP_ALL          | <a href="#">regulation of blood vessel size</a>                                                                       | <a href="#">RT</a> |  |  | 4     | 7.0E-1  | 1.0E0     |  |
| <input type="checkbox"/> | GOTERM_BP_ALL          | <a href="#">regulation of tube size</a>                                                                               | <a href="#">RT</a> |  |  | 4     | 7.0E-1  | 1.0E0     |  |
| <input type="checkbox"/> | GOTERM_BP_ALL          | <a href="#">vascular process in circulatory system</a>                                                                | <a href="#">RT</a> |  |  | 4     | 7.0E-1  | 1.0E0     |  |
| <input type="checkbox"/> | GOTERM_BP_ALL          | <a href="#">blood circulation</a>                                                                                     | <a href="#">RT</a> |  |  | 9     | 7.4E-1  | 1.0E0     |  |
| <input type="checkbox"/> | GOTERM_BP_ALL          | <a href="#">circulatory system process</a>                                                                            | <a href="#">RT</a> |  |  | 9     | 7.4E-1  | 1.0E0     |  |
|                          | Annotation Cluster 160 | Enrichment Score: 0.15                                                                                                | <b>G</b>           |  |  | Count | P_Value | Benjamini |  |
| <input type="checkbox"/> | SP_PIR_KEYWORDS        | <a href="#">Iron transport</a>                                                                                        | <a href="#">RT</a> |  |  | 3     | 4.5E-1  | 1.0E0     |  |
| <input type="checkbox"/> | GOTERM_BP_ALL          | <a href="#">iron ion transport</a>                                                                                    | <a href="#">RT</a> |  |  | 3     | 6.8E-1  | 1.0E0     |  |
| <input type="checkbox"/> | GOTERM_BP_ALL          | <a href="#">transition metal ion transport</a>                                                                        | <a href="#">RT</a> |  |  | 4     | 8.5E-1  | 1.0E0     |  |
| <input type="checkbox"/> | GOTERM_BP_ALL          | <a href="#">di-, tri-valent inorganic cation transport</a>                                                            | <a href="#">RT</a> |  |  | 8     | 9.5E-1  | 1.0E0     |  |
|                          | Annotation Cluster 161 | Enrichment Score: 0.15                                                                                                | <b>G</b>           |  |  | Count | P_Value | Benjamini |  |
| <input type="checkbox"/> | PIR_SUPERFAMILY        | PIRSF000050:cytochrome P450 CYP4B1                                                                                    | <a href="#">RT</a> |  |  | 3     | 1.3E-1  | 1.0E0     |  |
| <input type="checkbox"/> | INTERPRO               | <a href="#">Cytochrome P450</a>                                                                                       | <a href="#">RT</a> |  |  | 6     | 6.7E-1  | 1.0E0     |  |
| <input type="checkbox"/> | INTERPRO               | <a href="#">Cytochrome P450, E-class, group I</a>                                                                     | <a href="#">RT</a> |  |  | 5     | 7.4E-1  | 1.0E0     |  |
| <input type="checkbox"/> | SP_PIR_KEYWORDS        | <a href="#">monooxygenase</a>                                                                                         | <a href="#">RT</a> |  |  | 7     | 7.4E-1  | 1.0E0     |  |
| <input type="checkbox"/> | GOTERM_MF_ALL          | <a href="#">monooxygenase activity</a>                                                                                | <a href="#">RT</a> |  |  | 7     | 9.1E-1  | 1.0E0     |  |
| <input type="checkbox"/> | UP_SEQ_FEATURE         | metal ion-binding site:Iron (heme axial ligand)                                                                       | <a href="#">RT</a> |  |  | 4     | 9.1E-1  | 1.0E0     |  |
| <input type="checkbox"/> | GOTERM_MF_ALL          | <a href="#">heme binding</a>                                                                                          | <a href="#">RT</a> |  |  | 9     | 9.5E-1  | 1.0E0     |  |
| <input type="checkbox"/> | GOTERM_MF_ALL          | <a href="#">tetrapyrrole binding</a>                                                                                  | <a href="#">RT</a> |  |  | 9     | 9.5E-1  | 1.0E0     |  |
| <input type="checkbox"/> | GOTERM_MF_ALL          | <a href="#">oxidoreductase activity, acting on paired donors, with incorporation or reduction of molecular oxygen</a> | <a href="#">RT</a> |  |  | 7     | 9.6E-1  | 1.0E0     |  |
| <input type="checkbox"/> | SP_PIR_KEYWORDS        | <a href="#">heme</a>                                                                                                  | <a href="#">RT</a> |  |  | 6     | 9.6E-1  | 1.0E0     |  |
|                          | Annotation Cluster 162 | Enrichment Score: 0.15                                                                                                | <b>G</b>           |  |  | Count | P_Value | Benjamini |  |
| <input type="checkbox"/> | GOTERM_BP_ALL          | <a href="#">immunoglobulin production</a>                                                                             | <a href="#">RT</a> |  |  | 4     | 6.4E-1  | 1.0E0     |  |
| <input type="checkbox"/> | GOTERM_BP_ALL          | <a href="#">production of molecular mediator of immune response</a>                                                   | <a href="#">RT</a> |  |  | 4     | 6.6E-1  | 1.0E0     |  |

|                          |                        |                                                                                                              |    |  |       |         |           |
|--------------------------|------------------------|--------------------------------------------------------------------------------------------------------------|----|--|-------|---------|-----------|
| <input type="checkbox"/> | GOTERM_BP_ALL          | <a href="#">somatic recombination of immunoglobulin gene segments</a>                                        | RT |  | 3     | 6.8E-1  | 1.0E0     |
| <input type="checkbox"/> | GOTERM_BP_ALL          | <a href="#">somatic cell DNA recombination</a>                                                               | RT |  | 3     | 7.2E-1  | 1.0E0     |
| <input type="checkbox"/> | GOTERM_BP_ALL          | <a href="#">somatic diversification of immune receptors via germline recombination within a single locus</a> | RT |  | 3     | 7.2E-1  | 1.0E0     |
| <input type="checkbox"/> | GOTERM_BP_ALL          | <a href="#">somatic diversification of immunoglobulins</a>                                                   | RT |  | 3     | 7.3E-1  | 1.0E0     |
| <input type="checkbox"/> | GOTERM_BP_ALL          | <a href="#">somatic diversification of immune receptors</a>                                                  | RT |  | 3     | 7.6E-1  | 1.0E0     |
| <input type="checkbox"/> | GOTERM_BP_ALL          | <a href="#">DNA recombination</a>                                                                            | RT |  | 6     | 8.1E-1  | 1.0E0     |
|                          | Annotation Cluster 163 | Enrichment Score: 0.15                                                                                       | G  |  | Count | P_Value | Benjamini |
| <input type="checkbox"/> | GOTERM_CC_ALL          | <a href="#">extrinsic to plasma membrane</a>                                                                 | RT |  | 5     | 6.5E-1  | 1.0E0     |
| <input type="checkbox"/> | GOTERM_CC_ALL          | <a href="#">extrinsic to membrane</a>                                                                        | RT |  | 6     | 7.1E-1  | 1.0E0     |
| <input type="checkbox"/> | GOTERM_CC_ALL          | <a href="#">heterotrimeric G-protein complex</a>                                                             | RT |  | 3     | 7.9E-1  | 1.0E0     |
|                          | Annotation Cluster 164 | Enrichment Score: 0.14                                                                                       | G  |  | Count | P_Value | Benjamini |
| <input type="checkbox"/> | INTERPRO               | <a href="#">K Homology</a>                                                                                   | RT |  | 3     | 6.8E-1  | 1.0E0     |
| <input type="checkbox"/> | INTERPRO               | <a href="#">K Homology, type 1</a>                                                                           | RT |  | 3     | 7.0E-1  | 1.0E0     |
| <input type="checkbox"/> | SMART                  | <a href="#">KH</a>                                                                                           | RT |  | 3     | 7.8E-1  | 1.0E0     |
|                          | Annotation Cluster 165 | Enrichment Score: 0.14                                                                                       | G  |  | Count | P_Value | Benjamini |
| <input type="checkbox"/> | GOTERM_MF_ALL          | <a href="#">Rab GTPase binding</a>                                                                           | RT |  | 3     | 4.7E-1  | 1.0E0     |
| <input type="checkbox"/> | GOTERM_MF_ALL          | <a href="#">Ras GTPase binding</a>                                                                           | RT |  | 4     | 8.1E-1  | 1.0E0     |
| <input type="checkbox"/> | GOTERM_MF_ALL          | <a href="#">small GTPase binding</a>                                                                         | RT |  | 4     | 8.4E-1  | 1.0E0     |
| <input type="checkbox"/> | GOTERM_MF_ALL          | <a href="#">GTPase binding</a>                                                                               | RT |  | 4     | 8.6E-1  | 1.0E0     |
|                          | Annotation Cluster 166 | Enrichment Score: 0.14                                                                                       | G  |  | Count | P_Value | Benjamini |
| <input type="checkbox"/> | GOTERM_BP_ALL          | <a href="#">mesoderm development</a>                                                                         | RT |  | 5     | 6.0E-1  | 1.0E0     |
| <input type="checkbox"/> | GOTERM_BP_ALL          | <a href="#">mesoderm formation</a>                                                                           | RT |  | 3     | 6.8E-1  | 1.0E0     |
| <input type="checkbox"/> | GOTERM_BP_ALL          | <a href="#">mesoderm morphogenesis</a>                                                                       | RT |  | 3     | 7.2E-1  | 1.0E0     |
| <input type="checkbox"/> | GOTERM_BP_ALL          | <a href="#">gastrulation</a>                                                                                 | RT |  | 5     | 7.2E-1  | 1.0E0     |
| <input type="checkbox"/> | GOTERM_BP_ALL          | <a href="#">formation of primary germ layer</a>                                                              | RT |  | 3     | 7.3E-1  | 1.0E0     |
| <input type="checkbox"/> | GOTERM_BP_ALL          | <a href="#">tissue morphogenesis</a>                                                                         | RT |  | 3     | 9.9E-1  | 1.0E0     |
|                          | Annotation Cluster 167 | Enrichment Score: 0.13                                                                                       | G  |  | Count | P_Value | Benjamini |
| <input type="checkbox"/> | GOTERM_MF_ALL          | <a href="#">damaged DNA binding</a>                                                                          | RT |  | 3     | 5.2E-1  | 1.0E0     |
| <input type="checkbox"/> | GOTERM_BP_ALL          | <a href="#">response to endogenous stimulus</a>                                                              | RT |  | 21    | 7.6E-1  | 1.0E0     |
| <input type="checkbox"/> | SP_PIR_KEYWORDS        | <a href="#">DNA repair</a>                                                                                   | RT |  | 9     | 7.7E-1  | 1.0E0     |
| <input type="checkbox"/> | GOTERM_BP_ALL          | <a href="#">response to DNA damage stimulus</a>                                                              | RT |  | 18    | 7.9E-1  | 1.0E0     |
| <input type="checkbox"/> | GOTERM_BP_ALL          | <a href="#">DNA repair</a>                                                                                   | RT |  | 14    | 8.2E-1  | 1.0E0     |
| <input type="checkbox"/> | SP_PIR_KEYWORDS        | <a href="#">DNA damage</a>                                                                                   | RT |  | 9     | 8.5E-1  | 1.0E0     |
|                          | Annotation Cluster 168 | Enrichment Score: 0.13                                                                                       | G  |  | Count | P_Value | Benjamini |
| <input type="checkbox"/> | INTERPRO               | <a href="#">Fibronectin, type III-like fold</a>                                                              | RT |  | 14    | 5.5E-1  | 1.0E0     |
| <input type="checkbox"/> | UP_SEQ_FEATURE         | domain:Fibronectin type-III 3                                                                                | RT |  | 4     | 5.9E-1  | 1.0E0     |
| <input type="checkbox"/> | GOTERM_MF_ALL          | <a href="#">transmembrane receptor protein tyrosine kinase activity</a>                                      | RT |  | 6     | 6.9E-1  | 1.0E0     |
| <input type="checkbox"/> | INTERPRO               | <a href="#">Fibronectin, type III</a>                                                                        | RT |  | 12    | 7.7E-1  | 1.0E0     |
| <input type="checkbox"/> | SMART                  | <a href="#">FN3</a>                                                                                          | RT |  | 13    | 8.6E-1  | 1.0E0     |
| <input type="checkbox"/> | UP_SEQ_FEATURE         | domain:Fibronectin type-III 2                                                                                | RT |  | 4     | 9.1E-1  | 1.0E0     |
| <input type="checkbox"/> | UP_SEQ_FEATURE         | domain:Fibronectin type-III 1                                                                                | RT |  | 4     | 9.1E-1  | 1.0E0     |
|                          | Annotation Cluster 169 | Enrichment Score: 0.12                                                                                       | G  |  | Count | P_Value | Benjamini |
| <input type="checkbox"/> | INTERPRO               | <a href="#">Tyrosine protein kinase</a>                                                                      | RT |  | 10    | 6.2E-1  | 1.0E0     |
| <input type="checkbox"/> | SP_PIR_KEYWORDS        | <a href="#">tyrosine-protein kinase</a>                                                                      | RT |  | 9     | 6.6E-1  | 1.0E0     |
| <input type="checkbox"/> | GOTERM_MF_ALL          | <a href="#">transmembrane receptor protein tyrosine kinase activity</a>                                      | RT |  | 6     | 6.9E-1  | 1.0E0     |
| <input type="checkbox"/> | SMART                  | <a href="#">TyrKc</a>                                                                                        | RT |  | 10    | 8.2E-1  | 1.0E0     |
| <input type="checkbox"/> | INTERPRO               | <a href="#">Tyrosine protein kinase, active site</a>                                                         | RT |  | 6     | 8.8E-1  | 1.0E0     |
| <input type="checkbox"/> | SP_PIR_KEYWORDS        | <a href="#">tyrosine-specific protein kinase</a>                                                             | RT |  | 3     | 8.9E-1  | 1.0E0     |

| Annotation Cluster 170   |                 | Enrichment Score: 0.12                                                                                                                    | G  |  | Count | P_Value | Benjamini |
|--------------------------|-----------------|-------------------------------------------------------------------------------------------------------------------------------------------|----|--|-------|---------|-----------|
| <input type="checkbox"/> | GOTERM_BP_ALL   | <a href="#">anatomical structure formation</a>                                                                                            | RT |  | 17    | 6.3E-1  | 1.0E0     |
| <input type="checkbox"/> | GOTERM_BP_ALL   | <a href="#">blood vessel development</a>                                                                                                  | RT |  | 18    | 7.1E-1  | 1.0E0     |
| <input type="checkbox"/> | GOTERM_BP_ALL   | <a href="#">vasculature development</a>                                                                                                   | RT |  | 18    | 7.2E-1  | 1.0E0     |
| <input type="checkbox"/> | GOTERM_BP_ALL   | <a href="#">organ morphogenesis</a>                                                                                                       | RT |  | 40    | 7.6E-1  | 1.0E0     |
| <input type="checkbox"/> | GOTERM_BP_ALL   | <a href="#">blood vessel morphogenesis</a>                                                                                                | RT |  | 14    | 8.3E-1  | 1.0E0     |
| <input type="checkbox"/> | GOTERM_BP_ALL   | <a href="#">angiogenesis</a>                                                                                                              | RT |  | 10    | 9.0E-1  | 1.0E0     |
| Annotation Cluster 171   |                 | Enrichment Score: 0.12                                                                                                                    | G  |  | Count | P_Value | Benjamini |
| <input type="checkbox"/> | GOTERM_BP_ALL   | <a href="#">nuclear mRNA splicing, via spliceosome</a>                                                                                    | RT |  | 6     | 4.6E-1  | 1.0E0     |
| <input type="checkbox"/> | GOTERM_BP_ALL   | <a href="#">RNA splicing, via transesterification reactions</a>                                                                           | RT |  | 6     | 4.6E-1  | 1.0E0     |
| <input type="checkbox"/> | GOTERM_BP_ALL   | <a href="#">RNA splicing, via transesterification reactions with bulged adenosine as nucleophile</a>                                      | RT |  | 6     | 4.6E-1  | 1.0E0     |
| <input type="checkbox"/> | GOTERM_CC_ALL   | <a href="#">spliceosome</a>                                                                                                               | RT |  | 10    | 6.7E-1  | 1.0E0     |
| <input type="checkbox"/> | SP_PIR_KEYWORDS | <a href="#">mrna splicing</a>                                                                                                             | RT |  | 10    | 8.3E-1  | 1.0E0     |
| <input type="checkbox"/> | GOTERM_BP_ALL   | <a href="#">mRNA metabolic process</a>                                                                                                    | RT |  | 18    | 8.6E-1  | 1.0E0     |
| <input type="checkbox"/> | GOTERM_BP_ALL   | <a href="#">RNA splicing</a>                                                                                                              | RT |  | 12    | 8.8E-1  | 1.0E0     |
| <input type="checkbox"/> | GOTERM_BP_ALL   | <a href="#">mRNA processing</a>                                                                                                           | RT |  | 14    | 9.4E-1  | 1.0E0     |
| <input type="checkbox"/> | SP_PIR_KEYWORDS | <a href="#">spliceosome</a>                                                                                                               | RT |  | 5     | 9.5E-1  | 1.0E0     |
| <input type="checkbox"/> | SP_PIR_KEYWORDS | <a href="#">mrna processing</a>                                                                                                           | RT |  | 10    | 9.6E-1  | 1.0E0     |
| <input type="checkbox"/> | GOTERM_CC_ALL   | <a href="#">ribonucleoprotein complex</a>                                                                                                 | RT |  | 21    | 9.9E-1  | 1.0E0     |
| <input type="checkbox"/> | GOTERM_BP_ALL   | <a href="#">RNA processing</a>                                                                                                            | RT |  | 15    | 1.0E0   | 1.0E0     |
| Annotation Cluster 172   |                 | Enrichment Score: 0.12                                                                                                                    | G  |  | Count | P_Value | Benjamini |
| <input type="checkbox"/> | INTERPRO        | <a href="#">SNF2-related</a>                                                                                                              | RT |  | 4     | 3.7E-1  | 1.0E0     |
| <input type="checkbox"/> | SP_PIR_KEYWORDS | <a href="#">helicase</a>                                                                                                                  | RT |  | 9     | 6.2E-1  | 1.0E0     |
| <input type="checkbox"/> | GOTERM_MF_ALL   | <a href="#">helicase activity</a>                                                                                                         | RT |  | 10    | 7.5E-1  | 1.0E0     |
| <input type="checkbox"/> | INTERPRO        | <a href="#">Helicase, superfamily 1 and 2, ATP-binding</a>                                                                                | RT |  | 6     | 7.7E-1  | 1.0E0     |
| <input type="checkbox"/> | SMART           | <a href="#">DEXDc</a>                                                                                                                     | RT |  | 8     | 7.7E-1  | 1.0E0     |
| <input type="checkbox"/> | INTERPRO        | <a href="#">DEAD-like helicase, N-terminal</a>                                                                                            | RT |  | 6     | 8.1E-1  | 1.0E0     |
| <input type="checkbox"/> | INTERPRO        | <a href="#">DNA/RNA helicase, C-terminal</a>                                                                                              | RT |  | 5     | 8.7E-1  | 1.0E0     |
| <input type="checkbox"/> | SMART           | <a href="#">HELICc</a>                                                                                                                    | RT |  | 6     | 8.9E-1  | 1.0E0     |
| <input type="checkbox"/> | UP_SEQ_FEATURE  | domain:Helicase C-terminal                                                                                                                | RT |  | 3     | 8.9E-1  | 1.0E0     |
| <input type="checkbox"/> | GOTERM_MF_ALL   | <a href="#">ATP-dependent helicase activity</a>                                                                                           | RT |  | 6     | 9.1E-1  | 1.0E0     |
| <input type="checkbox"/> | UP_SEQ_FEATURE  | domain:Helicase ATP-binding                                                                                                               | RT |  | 3     | 9.1E-1  | 1.0E0     |
| Annotation Cluster 173   |                 | Enrichment Score: 0.12                                                                                                                    | G  |  | Count | P_Value | Benjamini |
| <input type="checkbox"/> | GOTERM_BP_ALL   | <a href="#">regulation of cell activation</a>                                                                                             | RT |  | 10    | 4.9E-1  | 1.0E0     |
| <input type="checkbox"/> | GOTERM_BP_ALL   | <a href="#">regulation of immune system process</a>                                                                                       | RT |  | 10    | 5.7E-1  | 1.0E0     |
| <input type="checkbox"/> | GOTERM_BP_ALL   | <a href="#">immune effector process</a>                                                                                                   | RT |  | 11    | 6.8E-1  | 1.0E0     |
| <input type="checkbox"/> | GOTERM_BP_ALL   | <a href="#">adaptive immune response based on somatic recombination of immune receptors built from immunoglobulin superfamily domains</a> | RT |  | 8     | 6.9E-1  | 1.0E0     |
| <input type="checkbox"/> | GOTERM_BP_ALL   | <a href="#">adaptive immune response</a>                                                                                                  | RT |  | 8     | 6.9E-1  | 1.0E0     |
| <input type="checkbox"/> | GOTERM_BP_ALL   | <a href="#">regulation of multicellular organismal process</a>                                                                            | RT |  | 24    | 6.9E-1  | 1.0E0     |
| <input type="checkbox"/> | GOTERM_BP_ALL   | <a href="#">regulation of immune response</a>                                                                                             | RT |  | 9     | 6.9E-1  | 1.0E0     |
| <input type="checkbox"/> | GOTERM_BP_ALL   | <a href="#">alpha-beta T cell activation</a>                                                                                              | RT |  | 3     | 7.8E-1  | 1.0E0     |
| <input type="checkbox"/> | GOTERM_BP_ALL   | <a href="#">positive regulation of multicellular organismal process</a>                                                                   | RT |  | 9     | 8.0E-1  | 1.0E0     |
| <input type="checkbox"/> | GOTERM_BP_ALL   | <a href="#">innate immune response</a>                                                                                                    | RT |  | 7     | 8.0E-1  | 1.0E0     |
| <input type="checkbox"/> | GOTERM_BP_ALL   | <a href="#">lymphocyte mediated immunity</a>                                                                                              | RT |  | 7     | 8.0E-1  | 1.0E0     |
| <input type="checkbox"/> | GOTERM_BP_ALL   | <a href="#">positive regulation of immune system process</a>                                                                              | RT |  | 7     | 8.2E-1  | 1.0E0     |
| <input type="checkbox"/> | GOTERM_BP_ALL   | <a href="#">immunoglobulin mediated immune</a>                                                                                            | RT |  | 5     | 8.4E-1  | 1.0E0     |

|                          |                        |                                                                  |                    |  | Count | P_Value | Benjamini |
|--------------------------|------------------------|------------------------------------------------------------------|--------------------|--|-------|---------|-----------|
| <input type="checkbox"/> |                        | <a href="#">response</a>                                         | <a href="#">RT</a> |  | 5     | 8.4E-1  | 1.0E0     |
| <input type="checkbox"/> | GOTERM_BP_ALL          | <a href="#">leukocyte mediated immunity</a>                      | <a href="#">RT</a> |  | 7     | 8.4E-1  | 1.0E0     |
| <input type="checkbox"/> | GOTERM_BP_ALL          | <a href="#">B cell mediated immunity</a>                         | <a href="#">RT</a> |  | 5     | 8.5E-1  | 1.0E0     |
| <input type="checkbox"/> | GOTERM_BP_ALL          | <a href="#">positive regulation of immune response</a>           | <a href="#">RT</a> |  | 6     | 9.0E-1  | 1.0E0     |
| <input type="checkbox"/> | GOTERM_BP_ALL          | <a href="#">acute inflammatory response</a>                      | <a href="#">RT</a> |  | 4     | 9.6E-1  | 1.0E0     |
| <input type="checkbox"/> | GOTERM_BP_ALL          | <a href="#">activation of immune response</a>                    | <a href="#">RT</a> |  | 3     | 9.9E-1  | 1.0E0     |
|                          | Annotation Cluster 174 | Enrichment Score: 0.11                                           | <b>G</b>           |  | Count | P_Value | Benjamini |
| <input type="checkbox"/> | GOTERM_BP_ALL          | <a href="#">blood circulation</a>                                | <a href="#">RT</a> |  | 9     | 7.4E-1  | 1.0E0     |
| <input type="checkbox"/> | GOTERM_BP_ALL          | <a href="#">circulatory system process</a>                       | <a href="#">RT</a> |  | 9     | 7.4E-1  | 1.0E0     |
| <input type="checkbox"/> | GOTERM_BP_ALL          | <a href="#">heart contraction</a>                                | <a href="#">RT</a> |  | 4     | 7.7E-1  | 1.0E0     |
| <input type="checkbox"/> | GOTERM_BP_ALL          | <a href="#">heart process</a>                                    | <a href="#">RT</a> |  | 4     | 7.7E-1  | 1.0E0     |
| <input type="checkbox"/> | GOTERM_BP_ALL          | <a href="#">regulation of heart contraction</a>                  | <a href="#">RT</a> |  | 3     | 8.6E-1  | 1.0E0     |
|                          | Annotation Cluster 175 | Enrichment Score: 0.11                                           | <b>G</b>           |  | Count | P_Value | Benjamini |
| <input type="checkbox"/> | SP_PIR_KEYWORDS        | <a href="#">receptor</a>                                         | <a href="#">RT</a> |  | 91    | 5.8E-1  | 1.0E0     |
| <input type="checkbox"/> | GOTERM_MF_ALL          | <a href="#">receptor activity</a>                                | <a href="#">RT</a> |  | 109   | 8.2E-1  | 1.0E0     |
| <input type="checkbox"/> | GOTERM_MF_ALL          | <a href="#">signal transducer activity</a>                       | <a href="#">RT</a> |  | 126   | 8.8E-1  | 1.0E0     |
| <input type="checkbox"/> | GOTERM_MF_ALL          | <a href="#">molecular transducer activity</a>                    | <a href="#">RT</a> |  | 126   | 8.8E-1  | 1.0E0     |
|                          | Annotation Cluster 176 | Enrichment Score: 0.11                                           | <b>G</b>           |  | Count | P_Value | Benjamini |
| <input type="checkbox"/> | GOTERM_BP_ALL          | <a href="#">regulation of cell shape</a>                         | <a href="#">RT</a> |  | 4     | 7.8E-1  | 1.0E0     |
| <input type="checkbox"/> | GOTERM_BP_ALL          | <a href="#">regulation of cell morphogenesis</a>                 | <a href="#">RT</a> |  | 4     | 7.8E-1  | 1.0E0     |
| <input type="checkbox"/> | GOTERM_BP_ALL          | <a href="#">regulation of anatomical structure morphogenesis</a> | <a href="#">RT</a> |  | 4     | 7.8E-1  | 1.0E0     |
|                          | Annotation Cluster 177 | Enrichment Score: 0.11                                           | <b>G</b>           |  | Count | P_Value | Benjamini |
| <input type="checkbox"/> | GOTERM_MF_ALL          | <a href="#">protein dimerization activity</a>                    | <a href="#">RT</a> |  | 22    | 6.1E-1  | 1.0E0     |
| <input type="checkbox"/> | GOTERM_MF_ALL          | <a href="#">protein homodimerization activity</a>                | <a href="#">RT</a> |  | 10    | 8.2E-1  | 1.0E0     |
| <input type="checkbox"/> | GOTERM_MF_ALL          | <a href="#">identical protein binding</a>                        | <a href="#">RT</a> |  | 16    | 9.6E-1  | 1.0E0     |
|                          | Annotation Cluster 178 | Enrichment Score: 0.11                                           | <b>G</b>           |  | Count | P_Value | Benjamini |
| <input type="checkbox"/> | GOTERM_BP_ALL          | <a href="#">cholesterol metabolic process</a>                    | <a href="#">RT</a> |  | 6     | 6.7E-1  | 1.0E0     |
| <input type="checkbox"/> | GOTERM_BP_ALL          | <a href="#">sterol metabolic process</a>                         | <a href="#">RT</a> |  | 6     | 7.5E-1  | 1.0E0     |
| <input type="checkbox"/> | GOTERM_BP_ALL          | <a href="#">steroid metabolic process</a>                        | <a href="#">RT</a> |  | 11    | 7.9E-1  | 1.0E0     |
| <input type="checkbox"/> | GOTERM_BP_ALL          | <a href="#">alcohol metabolic process</a>                        | <a href="#">RT</a> |  | 17    | 9.4E-1  | 1.0E0     |
|                          | Annotation Cluster 179 | Enrichment Score: 0.1                                            | <b>G</b>           |  | Count | P_Value | Benjamini |
| <input type="checkbox"/> | UP_SEQ_FEATURE         | transit peptide:Mitochondrion                                    | <a href="#">RT</a> |  | 19    | 6.5E-1  | 1.0E0     |
| <input type="checkbox"/> | SP_PIR_KEYWORDS        | <a href="#">Mitochondrion</a>                                    | <a href="#">RT</a> |  | 43    | 8.0E-1  | 1.0E0     |
| <input type="checkbox"/> | SP_PIR_KEYWORDS        | <a href="#">transit peptide</a>                                  | <a href="#">RT</a> |  | 25    | 8.3E-1  | 1.0E0     |
| <input type="checkbox"/> | GOTERM_CC_ALL          | <a href="#">mitochondrion</a>                                    | <a href="#">RT</a> |  | 60    | 9.2E-1  | 1.0E0     |
|                          | Annotation Cluster 180 | Enrichment Score: 0.1                                            | <b>G</b>           |  | Count | P_Value | Benjamini |
| <input type="checkbox"/> | GOTERM_BP_ALL          | <a href="#">phagocytosis</a>                                     | <a href="#">RT</a> |  | 4     | 5.7E-1  | 1.0E0     |
| <input type="checkbox"/> | GOTERM_BP_ALL          | <a href="#">vesicle-mediated transport</a>                       | <a href="#">RT</a> |  | 31    | 8.4E-1  | 1.0E0     |
| <input type="checkbox"/> | GOTERM_BP_ALL          | <a href="#">membrane invagination</a>                            | <a href="#">RT</a> |  | 12    | 8.5E-1  | 1.0E0     |
| <input type="checkbox"/> | GOTERM_BP_ALL          | <a href="#">endocytosis</a>                                      | <a href="#">RT</a> |  | 12    | 8.5E-1  | 1.0E0     |
| <input type="checkbox"/> | GOTERM_BP_ALL          | <a href="#">membrane organization and biogenesis</a>             | <a href="#">RT</a> |  | 16    | 9.3E-1  | 1.0E0     |
|                          | Annotation Cluster 181 | Enrichment Score: 0.1                                            | <b>G</b>           |  | Count | P_Value | Benjamini |
| <input type="checkbox"/> | UP_SEQ_FEATURE         | domain:C2                                                        | <a href="#">RT</a> |  | 4     | 5.4E-1  | 1.0E0     |
| <input type="checkbox"/> | INTERPRO               | <a href="#">C2 calcium-dependent membrane targeting</a>          | <a href="#">RT</a> |  | 6     | 9.6E-1  | 1.0E0     |
| <input type="checkbox"/> | SMART                  | <a href="#">C2</a>                                               | <a href="#">RT</a> |  | 6     | 9.9E-1  | 1.0E0     |
|                          | Annotation Cluster 182 | Enrichment Score: 0.09                                           | <b>G</b>           |  | Count | P_Value | Benjamini |
| <input type="checkbox"/> | GOTERM_CC_ALL          | <a href="#">endoplasmic reticulum part</a>                       | <a href="#">RT</a> |  | 8     | 7.8E-1  | 1.0E0     |
| <input type="checkbox"/> | GOTERM_CC_ALL          | <a href="#">endoplasmic reticulum membrane</a>                   | <a href="#">RT</a> |  | 7     | 8.0E-1  | 1.0E0     |
| <input type="checkbox"/> | GOTERM_CC_ALL          | <a href="#">intrinsic to endoplasmic reticulum membrane</a>      | <a href="#">RT</a> |  | 3     | 8.0E-1  | 1.0E0     |
| <input type="checkbox"/> | GOTERM_CC_ALL          | <a href="#">nuclear envelope-endoplasmic reticulum</a>           | <a href="#">RT</a> |  | 7     | 8.3E-1  | 1.0E0     |

|                                               |                         |                                                                          |           |  | Count | P_Value | Benjamini |
|-----------------------------------------------|-------------------------|--------------------------------------------------------------------------|-----------|--|-------|---------|-----------|
| <input type="checkbox"/>                      | <a href="#">network</a> |                                                                          | <b>G</b>  |  | 7     | 6.5E-1  | 1.0E0     |
| Annotation Cluster 183 Enrichment Score: 0.09 |                         |                                                                          |           |  |       |         |           |
| <input type="checkbox"/>                      | GOTERM_MF_ALL           | <a href="#">carbon-carbon lyase activity</a>                             | <b>RT</b> |  | 4     | 7.1E-1  | 1.0E0     |
| <input type="checkbox"/>                      | GOTERM_MF_ALL           | <a href="#">carboxy-lyase activity</a>                                   | <b>RT</b> |  | 3     | 7.4E-1  | 1.0E0     |
| <input type="checkbox"/>                      | GOTERM_MF_ALL           | <a href="#">lyase activity</a>                                           | <b>RT</b> |  | 7     | 9.9E-1  | 1.0E0     |
| Annotation Cluster 184 Enrichment Score: 0.09 |                         |                                                                          |           |  |       |         |           |
| <input type="checkbox"/>                      | INTERPRO                | <a href="#">SH2 motif</a>                                                | <b>RT</b> |  | 8     | 7.4E-1  | 1.0E0     |
| <input type="checkbox"/>                      | SP_PIR_KEYWORDS         | <a href="#">sh2 domain</a>                                               | <b>RT</b> |  | 8     | 7.5E-1  | 1.0E0     |
| <input type="checkbox"/>                      | UP_SEQ_FEATURE          | domain:SH2                                                               | <b>RT</b> |  | 4     | 8.7E-1  | 1.0E0     |
| <input type="checkbox"/>                      | SMART                   | <a href="#">SH2</a>                                                      | <b>RT</b> |  | 8     | 8.7E-1  | 1.0E0     |
| Annotation Cluster 185 Enrichment Score: 0.09 |                         |                                                                          |           |  |       |         |           |
| <input type="checkbox"/>                      | UP_SEQ_FEATURE          | DNA-binding region:HMG box                                               | <b>RT</b> |  | 3     | 6.8E-1  | 1.0E0     |
| <input type="checkbox"/>                      | INTERPRO                | <a href="#">High mobility group box, HMG1/HMG2</a>                       | <b>RT</b> |  | 4     | 7.8E-1  | 1.0E0     |
| <input type="checkbox"/>                      | SMART                   | <a href="#">HMG</a>                                                      | <b>RT</b> |  | 4     | 8.9E-1  | 1.0E0     |
| <input type="checkbox"/>                      | INTERPRO                | <a href="#">High mobility group box, HMG</a>                             | <b>RT</b> |  | 3     | 8.9E-1  | 1.0E0     |
| Annotation Cluster 186 Enrichment Score: 0.09 |                         |                                                                          |           |  |       |         |           |
| <input type="checkbox"/>                      | GOTERM_BP_ALL           | <a href="#">regulation of I-kappaB kinase/NF-kappaB cascade</a>          | <b>RT</b> |  | 4     | 6.6E-1  | 1.0E0     |
| <input type="checkbox"/>                      | GOTERM_BP_ALL           | <a href="#">positive regulation of I-kappaB kinase/NF-kappaB cascade</a> | <b>RT</b> |  | 3     | 8.4E-1  | 1.0E0     |
| <input type="checkbox"/>                      | GOTERM_BP_ALL           | <a href="#">positive regulation of signal transduction</a>               | <b>RT</b> |  | 7     | 8.6E-1  | 1.0E0     |
| <input type="checkbox"/>                      | GOTERM_BP_ALL           | <a href="#">I-kappaB kinase/NF-kappaB cascade</a>                        | <b>RT</b> |  | 4     | 9.0E-1  | 1.0E0     |
| Annotation Cluster 187 Enrichment Score: 0.09 |                         |                                                                          |           |  |       |         |           |
| <input type="checkbox"/>                      | GOTERM_BP_ALL           | <a href="#">cell morphogenesis</a>                                       | <b>RT</b> |  | 42    | 5.7E-1  | 1.0E0     |
| <input type="checkbox"/>                      | GOTERM_BP_ALL           | <a href="#">cellular structure morphogenesis</a>                         | <b>RT</b> |  | 42    | 5.7E-1  | 1.0E0     |
| <input type="checkbox"/>                      | GOTERM_BP_ALL           | <a href="#">nervous system development</a>                               | <b>RT</b> |  | 51    | 6.8E-1  | 1.0E0     |
| <input type="checkbox"/>                      | GOTERM_BP_ALL           | <a href="#">cell projection morphogenesis</a>                            | <b>RT</b> |  | 21    | 7.9E-1  | 1.0E0     |
| <input type="checkbox"/>                      | GOTERM_BP_ALL           | <a href="#">cell projection organization and biogenesis</a>              | <b>RT</b> |  | 21    | 7.9E-1  | 1.0E0     |
| <input type="checkbox"/>                      | GOTERM_BP_ALL           | <a href="#">cell part morphogenesis</a>                                  | <b>RT</b> |  | 21    | 7.9E-1  | 1.0E0     |
| <input type="checkbox"/>                      | GOTERM_BP_ALL           | <a href="#">neurite development</a>                                      | <b>RT</b> |  | 15    | 8.0E-1  | 1.0E0     |
| <input type="checkbox"/>                      | GOTERM_BP_ALL           | <a href="#">axon guidance</a>                                            | <b>RT</b> |  | 6     | 8.3E-1  | 1.0E0     |
| <input type="checkbox"/>                      | GOTERM_BP_ALL           | <a href="#">cellular morphogenesis during differentiation</a>            | <b>RT</b> |  | 14    | 8.3E-1  | 1.0E0     |
| <input type="checkbox"/>                      | GOTERM_BP_ALL           | <a href="#">neuron development</a>                                       | <b>RT</b> |  | 16    | 8.7E-1  | 1.0E0     |
| <input type="checkbox"/>                      | GOTERM_BP_ALL           | <a href="#">neuron morphogenesis during differentiation</a>              | <b>RT</b> |  | 11    | 9.2E-1  | 1.0E0     |
| <input type="checkbox"/>                      | GOTERM_BP_ALL           | <a href="#">neurite morphogenesis</a>                                    | <b>RT</b> |  | 11    | 9.2E-1  | 1.0E0     |
| <input type="checkbox"/>                      | GOTERM_BP_ALL           | <a href="#">axonogenesis</a>                                             | <b>RT</b> |  | 10    | 9.2E-1  | 1.0E0     |
| <input type="checkbox"/>                      | GOTERM_BP_ALL           | <a href="#">neuron differentiation</a>                                   | <b>RT</b> |  | 19    | 9.3E-1  | 1.0E0     |
| <input type="checkbox"/>                      | GOTERM_BP_ALL           | <a href="#">neurogenesis</a>                                             | <b>RT</b> |  | 23    | 9.5E-1  | 1.0E0     |
| <input type="checkbox"/>                      | GOTERM_BP_ALL           | <a href="#">generation of neurons</a>                                    | <b>RT</b> |  | 20    | 9.7E-1  | 1.0E0     |
| Annotation Cluster 188 Enrichment Score: 0.09 |                         |                                                                          |           |  |       |         |           |
| <input type="checkbox"/>                      | GOTERM_BP_ALL           | <a href="#">electron transport</a>                                       | <b>RT</b> |  | 31    | 6.8E-1  | 1.0E0     |
| <input type="checkbox"/>                      | GOTERM_MF_ALL           | <a href="#">oxidoreductase activity</a>                                  | <b>RT</b> |  | 64    | 7.1E-1  | 1.0E0     |
| <input type="checkbox"/>                      | SP_PIR_KEYWORDS         | <a href="#">oxidoreductase</a>                                           | <b>RT</b> |  | 32    | 9.4E-1  | 1.0E0     |
| <input type="checkbox"/>                      | GOTERM_BP_ALL           | <a href="#">generation of precursor metabolites and energy</a>           | <b>RT</b> |  | 33    | 9.5E-1  | 1.0E0     |
| Annotation Cluster 189 Enrichment Score: 0.09 |                         |                                                                          |           |  |       |         |           |
| <input type="checkbox"/>                      | GOTERM_MF_ALL           | <a href="#">FAD binding</a>                                              | <b>RT</b> |  | 5     | 7.2E-1  | 1.0E0     |
| <input type="checkbox"/>                      | SP_PIR_KEYWORDS         | <a href="#">fad</a>                                                      | <b>RT</b> |  | 7     | 7.4E-1  | 1.0E0     |
| <input type="checkbox"/>                      | SP_PIR_KEYWORDS         | <a href="#">flavoprotein</a>                                             | <b>RT</b> |  | 7     | 7.9E-1  | 1.0E0     |
| <input type="checkbox"/>                      | GOTERM_MF_ALL           | <a href="#">coenzyme binding</a>                                         | <b>RT</b> |  | 8     | 8.9E-1  | 1.0E0     |
| <input type="checkbox"/>                      | GOTERM_MF_ALL           | <a href="#">cofactor binding</a>                                         | <b>RT</b> |  | 11    | 9.2E-1  | 1.0E0     |

| Annotation Cluster 190   |                 | Enrichment Score: 0.08                                                  | G  |  | Count | P_Value | Benjamini |
|--------------------------|-----------------|-------------------------------------------------------------------------|----|--|-------|---------|-----------|
| <input type="checkbox"/> | GOTERM_MF_ALL   | <a href="#">nucleotide receptor activity, G-protein coupled</a>         | RT |  | 7     | 3.8E-1  | 1.0E0     |
| <input type="checkbox"/> | GOTERM_MF_ALL   | <a href="#">nucleotide receptor activity</a>                            | RT |  | 7     | 4.0E-1  | 1.0E0     |
| <input type="checkbox"/> | SP_PIR_KEYWORDS | <a href="#">transducer</a>                                              | RT |  | 22    | 9.8E-1  | 1.0E0     |
| <input type="checkbox"/> | SP_PIR_KEYWORDS | <a href="#">g-protein coupled receptor</a>                              | RT |  | 18    | 9.9E-1  | 1.0E0     |
| <input type="checkbox"/> | KEGG_PATHWAY    | <a href="#">Neuroactive ligand-receptor interaction</a>                 | RT |  | 10    | 9.9E-1  | 1.0E0     |
| <input type="checkbox"/> | INTERPRO        | <a href="#">Rhodopsin-like GPCR superfamily</a>                         | RT |  | 11    | 1.0E0   | 1.0E0     |
| <input type="checkbox"/> | GOTERM_MF_ALL   | <a href="#">rhodopsin-like receptor activity</a>                        | RT |  | 17    | 1.0E0   | 1.0E0     |
| <input type="checkbox"/> | GOTERM_MF_ALL   | <a href="#">G-protein coupled receptor activity</a>                     | RT |  | 21    | 1.0E0   | 1.0E0     |
| <input type="checkbox"/> | GOTERM_MF_ALL   | <a href="#">transmembrane receptor activity</a>                         | RT |  | 41    | 1.0E0   | 1.0E0     |
| <input type="checkbox"/> | GOTERM_BP_ALL   | <a href="#">G-protein coupled receptor protein signaling pathway</a>    | RT |  | 31    | 1.0E0   | 1.0E0     |
| Annotation Cluster 191   |                 | Enrichment Score: 0.08                                                  | G  |  | Count | P_Value | Benjamini |
| <input type="checkbox"/> | INTERPRO        | <a href="#">Sushi/SCR/CCP</a>                                           | RT |  | 4     | 7.7E-1  | 1.0E0     |
| <input type="checkbox"/> | SMART           | <a href="#">CCP</a>                                                     | RT |  | 4     | 8.5E-1  | 1.0E0     |
| <input type="checkbox"/> | SP_PIR_KEYWORDS | <a href="#">sushi</a>                                                   | RT |  | 3     | 8.6E-1  | 1.0E0     |
| Annotation Cluster 192   |                 | Enrichment Score: 0.08                                                  | G  |  | Count | P_Value | Benjamini |
| <input type="checkbox"/> | UP_SEQ_FEATURE  | DNA-binding region:Basic motif                                          | RT |  | 9     | 5.9E-1  | 1.0E0     |
| <input type="checkbox"/> | INTERPRO        | <a href="#">Basic helix-loop-helix dimerisation region bHLH</a>         | RT |  | 7     | 8.1E-1  | 1.0E0     |
| <input type="checkbox"/> | SMART           | <a href="#">HLH</a>                                                     | RT |  | 7     | 9.3E-1  | 1.0E0     |
| <input type="checkbox"/> | UP_SEQ_FEATURE  | domain:Helix-loop-helix motif                                           | RT |  | 4     | 9.4E-1  | 1.0E0     |
| <input type="checkbox"/> | INTERPRO        | <a href="#">Helix-loop-helix DNA-binding</a>                            | RT |  | 4     | 9.5E-1  | 1.0E0     |
| Annotation Cluster 193   |                 | Enrichment Score: 0.08                                                  | G  |  | Count | P_Value | Benjamini |
| <input type="checkbox"/> | GOTERM_BP_ALL   | <a href="#">fatty acid biosynthetic process</a>                         | RT |  | 5     | 7.9E-1  | 1.0E0     |
| <input type="checkbox"/> | SP_PIR_KEYWORDS | <a href="#">fatty acid biosynthesis</a>                                 | RT |  | 3     | 8.2E-1  | 1.0E0     |
| <input type="checkbox"/> | GOTERM_BP_ALL   | <a href="#">organic acid biosynthetic process</a>                       | RT |  | 5     | 8.2E-1  | 1.0E0     |
| <input type="checkbox"/> | GOTERM_BP_ALL   | <a href="#">carboxylic acid biosynthetic process</a>                    | RT |  | 5     | 8.2E-1  | 1.0E0     |
| <input type="checkbox"/> | SP_PIR_KEYWORDS | <a href="#">lipid synthesis</a>                                         | RT |  | 4     | 9.5E-1  | 1.0E0     |
| Annotation Cluster 194   |                 | Enrichment Score: 0.07                                                  | G  |  | Count | P_Value | Benjamini |
| <input type="checkbox"/> | GOTERM_BP_ALL   | <a href="#">cofactor metabolic process</a>                              | RT |  | 18    | 5.6E-1  | 1.0E0     |
| <input type="checkbox"/> | GOTERM_BP_ALL   | <a href="#">cofactor biosynthetic process</a>                           | RT |  | 6     | 9.6E-1  | 1.0E0     |
| <input type="checkbox"/> | GOTERM_BP_ALL   | <a href="#">coenzyme metabolic process</a>                              | RT |  | 9     | 9.7E-1  | 1.0E0     |
| <input type="checkbox"/> | GOTERM_BP_ALL   | <a href="#">coenzyme biosynthetic process</a>                           | RT |  | 4     | 9.9E-1  | 1.0E0     |
| Annotation Cluster 195   |                 | Enrichment Score: 0.07                                                  | G  |  | Count | P_Value | Benjamini |
| <input type="checkbox"/> | INTERPRO        | <a href="#">Laminin G, subdomain 2</a>                                  | RT |  | 3     | 8.0E-1  | 1.0E0     |
| <input type="checkbox"/> | INTERPRO        | <a href="#">Laminin G</a>                                               | RT |  | 3     | 8.4E-1  | 1.0E0     |
| <input type="checkbox"/> | SMART           | <a href="#">LamG</a>                                                    | RT |  | 3     | 9.0E-1  | 1.0E0     |
| Annotation Cluster 196   |                 | Enrichment Score: 0.07                                                  | G  |  | Count | P_Value | Benjamini |
| <input type="checkbox"/> | GOTERM_MF_ALL   | <a href="#">antioxidant activity</a>                                    | RT |  | 4     | 8.3E-1  | 1.0E0     |
| <input type="checkbox"/> | GOTERM_MF_ALL   | <a href="#">oxidoreductase activity, acting on peroxide as acceptor</a> | RT |  | 3     | 8.7E-1  | 1.0E0     |
| <input type="checkbox"/> | GOTERM_MF_ALL   | <a href="#">peroxidase activity</a>                                     | RT |  | 3     | 8.7E-1  | 1.0E0     |
| Annotation Cluster 197   |                 | Enrichment Score: 0.06                                                  | G  |  | Count | P_Value | Benjamini |
| <input type="checkbox"/> | UP_SEQ_FEATURE  | region of interest:Calmodulin-binding                                   | RT |  | 3     | 8.3E-1  | 1.0E0     |
| <input type="checkbox"/> | SP_PIR_KEYWORDS | <a href="#">calmodulin-binding</a>                                      | RT |  | 6     | 8.7E-1  | 1.0E0     |
| <input type="checkbox"/> | GOTERM_MF_ALL   | <a href="#">calmodulin binding</a>                                      | RT |  | 7     | 9.0E-1  | 1.0E0     |
| Annotation Cluster 198   |                 | Enrichment Score: 0.06                                                  | G  |  | Count | P_Value | Benjamini |
| <input type="checkbox"/> | GOTERM_BP_ALL   | <a href="#">hormone biosynthetic process</a>                            | RT |  | 3     | 8.1E-1  | 1.0E0     |
| <input type="checkbox"/> | GOTERM_BP_ALL   | <a href="#">steroid biosynthetic process</a>                            | RT |  | 5     | 8.6E-1  | 1.0E0     |
| <input type="checkbox"/> | GOTERM_BP_ALL   | <a href="#">hormone metabolic process</a>                               | RT |  | 5     | 9.3E-1  | 1.0E0     |
| Annotation Cluster 199   |                 | Enrichment Score: 0.05                                                  | G  |  | Count | P_Value | Benjamini |



| <input type="checkbox"/> | Category        | Term                                                           | RT                 |          | Count | P_Value | Benjamini |
|--------------------------|-----------------|----------------------------------------------------------------|--------------------|----------|-------|---------|-----------|
| <input type="checkbox"/> | GOTERM_CC_ALL   | <a href="#">synaptic vesicle</a>                               | <a href="#">RT</a> |          | 5     | 6.2E-1  | 1.0E0     |
| <input type="checkbox"/> | GOTERM_CC_ALL   | <a href="#">vesicle</a>                                        | <a href="#">RT</a> |          | 22    | 8.8E-1  | 1.0E0     |
| <input type="checkbox"/> | SP_PIR_KEYWORDS | <a href="#">cytoplasmic vesicle</a>                            | <a href="#">RT</a> |          | 8     | 8.8E-1  | 1.0E0     |
| <input type="checkbox"/> | GOTERM_CC_ALL   | <a href="#">cytoplasmic vesicle</a>                            | <a href="#">RT</a> |          | 20    | 9.3E-1  | 1.0E0     |
| <input type="checkbox"/> | GOTERM_CC_ALL   | <a href="#">membrane-bound vesicle</a>                         | <a href="#">RT</a> |          | 14    | 9.5E-1  | 1.0E0     |
| <input type="checkbox"/> | GOTERM_CC_ALL   | <a href="#">coated vesicle</a>                                 | <a href="#">RT</a> |          | 6     | 9.6E-1  | 1.0E0     |
| <input type="checkbox"/> | GOTERM_CC_ALL   | <a href="#">clathrin-coated vesicle</a>                        | <a href="#">RT</a> |          | 5     | 9.6E-1  | 1.0E0     |
| <input type="checkbox"/> | GOTERM_CC_ALL   | <a href="#">cytoplasmic membrane-bound vesicle</a>             | <a href="#">RT</a> |          | 12    | 9.8E-1  | 1.0E0     |
| Annotation Cluster 200   |                 | Enrichment Score: 0.05                                         |                    | <b>G</b> |       |         |           |
| <input type="checkbox"/> | GOTERM_BP_ALL   | <a href="#">pyruvate metabolic process</a>                     | <a href="#">RT</a> |          | 3     | 5.8E-1  | 1.0E0     |
| <input type="checkbox"/> | GOTERM_BP_ALL   | <a href="#">glucose metabolic process</a>                      | <a href="#">RT</a> |          | 7     | 8.9E-1  | 1.0E0     |
| <input type="checkbox"/> | GOTERM_BP_ALL   | <a href="#">alcohol metabolic process</a>                      | <a href="#">RT</a> |          | 17    | 9.4E-1  | 1.0E0     |
| <input type="checkbox"/> | GOTERM_BP_ALL   | <a href="#">hexose metabolic process</a>                       | <a href="#">RT</a> |          | 8     | 9.6E-1  | 1.0E0     |
| <input type="checkbox"/> | GOTERM_BP_ALL   | <a href="#">monosaccharide metabolic process</a>               | <a href="#">RT</a> |          | 8     | 9.6E-1  | 1.0E0     |
| <input type="checkbox"/> | GOTERM_BP_ALL   | <a href="#">cellular carbohydrate metabolic process</a>        | <a href="#">RT</a> |          | 12    | 1.0E0   | 1.0E0     |
| <input type="checkbox"/> | GOTERM_BP_ALL   | <a href="#">carbohydrate metabolic process</a>                 | <a href="#">RT</a> |          | 17    | 1.0E0   | 1.0E0     |
| Annotation Cluster 201   |                 | Enrichment Score: 0.05                                         |                    | <b>G</b> |       |         |           |
| <input type="checkbox"/> | GOTERM_BP_ALL   | <a href="#">protein targeting</a>                              | <a href="#">RT</a> |          | 18    | 7.2E-1  | 1.0E0     |
| <input type="checkbox"/> | GOTERM_BP_ALL   | <a href="#">intracellular protein transport</a>                | <a href="#">RT</a> |          | 32    | 7.6E-1  | 1.0E0     |
| <input type="checkbox"/> | GOTERM_BP_ALL   | <a href="#">protein transport</a>                              | <a href="#">RT</a> |          | 49    | 8.4E-1  | 1.0E0     |
| <input type="checkbox"/> | GOTERM_BP_ALL   | <a href="#">protein localization</a>                           | <a href="#">RT</a> |          | 56    | 8.7E-1  | 1.0E0     |
| <input type="checkbox"/> | GOTERM_BP_ALL   | <a href="#">macromolecule localization</a>                     | <a href="#">RT</a> |          | 57    | 9.0E-1  | 1.0E0     |
| <input type="checkbox"/> | GOTERM_BP_ALL   | <a href="#">establishment of protein localization</a>          | <a href="#">RT</a> |          | 50    | 9.1E-1  | 1.0E0     |
| <input type="checkbox"/> | GOTERM_BP_ALL   | <a href="#">intracellular transport</a>                        | <a href="#">RT</a> |          | 43    | 9.7E-1  | 1.0E0     |
| <input type="checkbox"/> | SP_PIR_KEYWORDS | <a href="#">protein transport</a>                              | <a href="#">RT</a> |          | 18    | 1.0E0   | 1.0E0     |
| <input type="checkbox"/> | GOTERM_BP_ALL   | <a href="#">establishment of cellular localization</a>         | <a href="#">RT</a> |          | 48    | 1.0E0   | 1.0E0     |
| <input type="checkbox"/> | GOTERM_BP_ALL   | <a href="#">cellular localization</a>                          | <a href="#">RT</a> |          | 48    | 1.0E0   | 1.0E0     |
| Annotation Cluster 202   |                 | Enrichment Score: 0.05                                         |                    | <b>G</b> |       |         |           |
| <input type="checkbox"/> | SP_PIR_KEYWORDS | <a href="#">microsome</a>                                      | <a href="#">RT</a> |          | 6     | 8.7E-1  | 1.0E0     |
| <input type="checkbox"/> | GOTERM_CC_ALL   | <a href="#">vesicular fraction</a>                             | <a href="#">RT</a> |          | 10    | 8.8E-1  | 1.0E0     |
| <input type="checkbox"/> | GOTERM_CC_ALL   | <a href="#">microsome</a>                                      | <a href="#">RT</a> |          | 9     | 9.2E-1  | 1.0E0     |
| Annotation Cluster 203   |                 | Enrichment Score: 0.05                                         |                    | <b>G</b> |       |         |           |
| <input type="checkbox"/> | UP_SEQ_FEATURE  | repeat:LRR 4                                                   | <a href="#">RT</a> |          | 6     | 7.8E-1  | 1.0E0     |
| <input type="checkbox"/> | SP_PIR_KEYWORDS | <a href="#">leucine-rich repeat</a>                            | <a href="#">RT</a> |          | 14    | 8.5E-1  | 1.0E0     |
| <input type="checkbox"/> | UP_SEQ_FEATURE  | repeat:LRR 3                                                   | <a href="#">RT</a> |          | 6     | 8.5E-1  | 1.0E0     |
| <input type="checkbox"/> | UP_SEQ_FEATURE  | repeat:LRR 1                                                   | <a href="#">RT</a> |          | 6     | 8.8E-1  | 1.0E0     |
| <input type="checkbox"/> | UP_SEQ_FEATURE  | repeat:LRR 2                                                   | <a href="#">RT</a> |          | 6     | 8.8E-1  | 1.0E0     |
| <input type="checkbox"/> | UP_SEQ_FEATURE  | repeat:LRR 9                                                   | <a href="#">RT</a> |          | 3     | 9.2E-1  | 1.0E0     |
| <input type="checkbox"/> | UP_SEQ_FEATURE  | repeat:LRR 8                                                   | <a href="#">RT</a> |          | 3     | 9.3E-1  | 1.0E0     |
| <input type="checkbox"/> | UP_SEQ_FEATURE  | repeat:LRR 5                                                   | <a href="#">RT</a> |          | 4     | 9.3E-1  | 1.0E0     |
| <input type="checkbox"/> | UP_SEQ_FEATURE  | repeat:LRR 7                                                   | <a href="#">RT</a> |          | 3     | 9.5E-1  | 1.0E0     |
| <input type="checkbox"/> | UP_SEQ_FEATURE  | repeat:LRR 6                                                   | <a href="#">RT</a> |          | 3     | 9.7E-1  | 1.0E0     |
| Annotation Cluster 204   |                 | Enrichment Score: 0.05                                         |                    | <b>G</b> |       |         |           |
| <input type="checkbox"/> | GOTERM_CC_ALL   | <a href="#">kinesin complex</a>                                | <a href="#">RT</a> |          | 3     | 7.2E-1  | 1.0E0     |
| <input type="checkbox"/> | GOTERM_MF_ALL   | <a href="#">microtubule motor activity</a>                     | <a href="#">RT</a> |          | 5     | 8.2E-1  | 1.0E0     |
| <input type="checkbox"/> | GOTERM_MF_ALL   | <a href="#">motor activity</a>                                 | <a href="#">RT</a> |          | 8     | 9.2E-1  | 1.0E0     |
| <input type="checkbox"/> | GOTERM_BP_ALL   | <a href="#">cytoskeleton-dependent intracellular transport</a> | <a href="#">RT</a> |          | 7     | 9.2E-1  | 1.0E0     |
| <input type="checkbox"/> | GOTERM_CC_ALL   | <a href="#">microtubule associated complex</a>                 | <a href="#">RT</a> |          | 5     | 9.6E-1  | 1.0E0     |
| <input type="checkbox"/> | GOTERM_BP_ALL   | <a href="#">microtubule-based movement</a>                     | <a href="#">RT</a> |          | 4     | 9.9E-1  | 1.0E0     |

| <input type="checkbox"/> | SP_PIR_KEYWORDS        | <a href="#">motor protein</a>                                                      | RT       |  |       | 3       | 9.9E-1    | 1.0E0 |
|--------------------------|------------------------|------------------------------------------------------------------------------------|----------|--|-------|---------|-----------|-------|
|                          | Annotation Cluster 205 | Enrichment Score: 0.04                                                             | <b>G</b> |  | Count | P_Value | Benjamini |       |
| <input type="checkbox"/> | GOTERM_MF_ALL          | <a href="#">translation elongation factor activity</a>                             | RT       |  |       | 3       | 7.2E-1    | 1.0E0 |
| <input type="checkbox"/> | GOTERM_MF_ALL          | <a href="#">translation factor activity, nucleic acid binding</a>                  | RT       |  |       | 7       | 9.2E-1    | 1.0E0 |
| <input type="checkbox"/> | GOTERM_MF_ALL          | <a href="#">translation regulator activity</a>                                     | RT       |  |       | 7       | 9.4E-1    | 1.0E0 |
| <input type="checkbox"/> | SP_PIR_KEYWORDS        | <a href="#">initiation factor</a>                                                  | RT       |  |       | 3       | 9.7E-1    | 1.0E0 |
| <input type="checkbox"/> | GOTERM_MF_ALL          | <a href="#">translation initiation factor activity</a>                             | RT       |  |       | 3       | 9.9E-1    | 1.0E0 |
|                          | Annotation Cluster 206 | Enrichment Score: 0.04                                                             | <b>G</b> |  | Count | P_Value | Benjamini |       |
| <input type="checkbox"/> | GOTERM_CC_ALL          | <a href="#">basal lamina</a>                                                       | RT       |  |       | 3       | 6.5E-1    | 1.0E0 |
| <input type="checkbox"/> | GOTERM_CC_ALL          | <a href="#">basement membrane</a>                                                  | RT       |  |       | 4       | 8.9E-1    | 1.0E0 |
| <input type="checkbox"/> | GOTERM_CC_ALL          | <a href="#">extracellular matrix part</a>                                          | RT       |  |       | 5       | 9.6E-1    | 1.0E0 |
| <input type="checkbox"/> | GOTERM_CC_ALL          | <a href="#">extracellular matrix</a>                                               | RT       |  |       | 12      | 1.0E0     | 1.0E0 |
| <input type="checkbox"/> | GOTERM_CC_ALL          | <a href="#">proteinaceous extracellular matrix</a>                                 | RT       |  |       | 10      | 1.0E0     | 1.0E0 |
| <input type="checkbox"/> | SP_PIR_KEYWORDS        | <a href="#">extracellular matrix</a>                                               | RT       |  |       | 4       | 1.0E0     | 1.0E0 |
|                          | Annotation Cluster 207 | Enrichment Score: 0.04                                                             | <b>G</b> |  | Count | P_Value | Benjamini |       |
| <input type="checkbox"/> | UP_SEQ_FEATURE         | domain:EGF-like 3                                                                  | RT       |  |       | 4       | 6.4E-1    | 1.0E0 |
| <input type="checkbox"/> | UP_SEQ_FEATURE         | domain:EGF-like 2                                                                  | RT       |  |       | 4       | 7.3E-1    | 1.0E0 |
| <input type="checkbox"/> | UP_SEQ_FEATURE         | domain:EGF-like 1                                                                  | RT       |  |       | 4       | 8.8E-1    | 1.0E0 |
| <input type="checkbox"/> | INTERPRO               | <a href="#">EGF-like</a>                                                           | RT       |  |       | 6       | 9.7E-1    | 1.0E0 |
| <input type="checkbox"/> | SP_PIR_KEYWORDS        | <a href="#">egf-like domain</a>                                                    | RT       |  |       | 9       | 9.9E-1    | 1.0E0 |
| <input type="checkbox"/> | INTERPRO               | <a href="#">EGF</a>                                                                | RT       |  |       | 8       | 9.9E-1    | 1.0E0 |
| <input type="checkbox"/> | INTERPRO               | <a href="#">Aspartic acid and asparagine hydroxylation site</a>                    | RT       |  |       | 3       | 9.9E-1    | 1.0E0 |
| <input type="checkbox"/> | INTERPRO               | <a href="#">EGF-like, type 3</a>                                                   | RT       |  |       | 7       | 9.9E-1    | 1.0E0 |
| <input type="checkbox"/> | SMART                  | <a href="#">EGF</a>                                                                | RT       |  |       | 8       | 1.0E0     | 1.0E0 |
| <input type="checkbox"/> | INTERPRO               | <a href="#">EGF-like region</a>                                                    | RT       |  |       | 9       | 1.0E0     | 1.0E0 |
|                          | Annotation Cluster 208 | Enrichment Score: 0.04                                                             | <b>G</b> |  | Count | P_Value | Benjamini |       |
| <input type="checkbox"/> | INTERPRO               | <a href="#">Leucine-rich repeat</a>                                                | RT       |  |       | 13      | 8.2E-1    | 1.0E0 |
| <input type="checkbox"/> | SP_PIR_KEYWORDS        | <a href="#">leucine-rich repeat</a>                                                | RT       |  |       | 14      | 8.5E-1    | 1.0E0 |
| <input type="checkbox"/> | INTERPRO               | <a href="#">Leucine-rich repeat, typical subtype</a>                               | RT       |  |       | 5       | 9.8E-1    | 1.0E0 |
| <input type="checkbox"/> | SMART                  | <a href="#">LRR_TYP</a>                                                            | RT       |  |       | 5       | 9.9E-1    | 1.0E0 |
|                          | Annotation Cluster 209 | Enrichment Score: 0.04                                                             | <b>G</b> |  | Count | P_Value | Benjamini |       |
| <input type="checkbox"/> | GOTERM_BP_ALL          | <a href="#">regulation of muscle contraction</a>                                   | RT       |  |       | 3       | 7.8E-1    | 1.0E0 |
| <input type="checkbox"/> | GOTERM_BP_ALL          | <a href="#">muscle contraction</a>                                                 | RT       |  |       | 4       | 9.8E-1    | 1.0E0 |
| <input type="checkbox"/> | GOTERM_BP_ALL          | <a href="#">muscle system process</a>                                              | RT       |  |       | 4       | 9.8E-1    | 1.0E0 |
|                          | Annotation Cluster 210 | Enrichment Score: 0.04                                                             | <b>G</b> |  | Count | P_Value | Benjamini |       |
| <input type="checkbox"/> | GOTERM_CC_ALL          | <a href="#">intercellular junction</a>                                             | RT       |  |       | 10      | 8.0E-1    | 1.0E0 |
| <input type="checkbox"/> | GOTERM_CC_ALL          | <a href="#">tight junction</a>                                                     | RT       |  |       | 4       | 9.1E-1    | 1.0E0 |
| <input type="checkbox"/> | GOTERM_CC_ALL          | <a href="#">apical junction complex</a>                                            | RT       |  |       | 4       | 9.7E-1    | 1.0E0 |
| <input type="checkbox"/> | GOTERM_CC_ALL          | <a href="#">apicolateral plasma membrane</a>                                       | RT       |  |       | 4       | 9.7E-1    | 1.0E0 |
|                          | Annotation Cluster 211 | Enrichment Score: 0.04                                                             | <b>G</b> |  | Count | P_Value | Benjamini |       |
| <input type="checkbox"/> | GOTERM_BP_ALL          | <a href="#">second-messenger-mediated signaling</a>                                | RT       |  |       | 10      | 8.3E-1    | 1.0E0 |
| <input type="checkbox"/> | GOTERM_BP_ALL          | <a href="#">cAMP-mediated signaling</a>                                            | RT       |  |       | 4       | 9.0E-1    | 1.0E0 |
| <input type="checkbox"/> | GOTERM_BP_ALL          | <a href="#">cyclic-nucleotide-mediated signaling</a>                               | RT       |  |       | 4       | 9.2E-1    | 1.0E0 |
| <input type="checkbox"/> | GOTERM_BP_ALL          | <a href="#">G-protein signaling, coupled to cAMP nucleotide second messenger</a>   | RT       |  |       | 3       | 9.6E-1    | 1.0E0 |
| <input type="checkbox"/> | GOTERM_BP_ALL          | <a href="#">G-protein signaling, coupled to cyclic nucleotide second messenger</a> | RT       |  |       | 3       | 9.7E-1    | 1.0E0 |
|                          | Annotation Cluster 212 | Enrichment Score: 0.04                                                             | <b>G</b> |  | Count | P_Value | Benjamini |       |
| <input type="checkbox"/> | GOTERM_MF_ALL          | <a href="#">inorganic anion transmembrane transporter activity</a>                 | RT       |  |       | 3       | 7.1E-1    | 1.0E0 |
| <input type="checkbox"/> | GOTERM_MF_ALL          | <a href="#">anion transmembrane transporter activity</a>                           | RT       |  |       | 6       | 9.4E-1    | 1.0E0 |
| <input type="checkbox"/> | GOTERM_BP_ALL          | <a href="#">chloride transport</a>                                                 | RT       |  |       | 3       | 9.6E-1    | 1.0E0 |

| <input type="checkbox"/> | GOTERM_BP_ALL          | <a href="#">inorganic anion transport</a>                    | <a href="#">RT</a> |  |  |  |  | 6     | 1.0E0   | 1.0E0     |
|--------------------------|------------------------|--------------------------------------------------------------|--------------------|--|--|--|--|-------|---------|-----------|
| <input type="checkbox"/> | GOTERM_BP_ALL          | <a href="#">anion transport</a>                              | <a href="#">RT</a> |  |  |  |  | 7     | 1.0E0   | 1.0E0     |
|                          | Annotation Cluster 213 | Enrichment Score: 0.04                                       | <b>G</b>           |  |  |  |  | Count | P_Value | Benjamini |
| <input type="checkbox"/> | GOTERM_BP_ALL          | <a href="#">eye development</a>                              | <a href="#">RT</a> |  |  |  |  | 7     | 8.4E-1  | 1.0E0     |
| <input type="checkbox"/> | GOTERM_BP_ALL          | <a href="#">camera-type eye development</a>                  | <a href="#">RT</a> |  |  |  |  | 4     | 9.3E-1  | 1.0E0     |
| <input type="checkbox"/> | GOTERM_BP_ALL          | <a href="#">sensory organ development</a>                    | <a href="#">RT</a> |  |  |  |  | 9     | 9.8E-1  | 1.0E0     |
|                          | Annotation Cluster 214 | Enrichment Score: 0.04                                       | <b>G</b>           |  |  |  |  | Count | P_Value | Benjamini |
| <input type="checkbox"/> | UP_SEQ_FEATURE         | site:Reactive bond                                           | <a href="#">RT</a> |  |  |  |  | 3     | 6.8E-1  | 1.0E0     |
| <input type="checkbox"/> | PIR_SUPERFAMILY        | PIRSF001630:serpin                                           | <a href="#">RT</a> |  |  |  |  | 3     | 8.0E-1  | 1.0E0     |
| <input type="checkbox"/> | INTERPRO               | <a href="#">Protease inhibitor I4, serpin</a>                | <a href="#">RT</a> |  |  |  |  | 3     | 9.2E-1  | 1.0E0     |
| <input type="checkbox"/> | SP_PIR_KEYWORDS        | <a href="#">Serine protease inhibitor</a>                    | <a href="#">RT</a> |  |  |  |  | 3     | 9.5E-1  | 1.0E0     |
| <input type="checkbox"/> | SMART                  | <a href="#">SERPIN</a>                                       | <a href="#">RT</a> |  |  |  |  | 3     | 9.6E-1  | 1.0E0     |
| <input type="checkbox"/> | GOTERM_MF_ALL          | <a href="#">serine-type endopeptidase inhibitor activity</a> | <a href="#">RT</a> |  |  |  |  | 5     | 9.6E-1  | 1.0E0     |
| <input type="checkbox"/> | SP_PIR_KEYWORDS        | <a href="#">protease inhibitor</a>                           | <a href="#">RT</a> |  |  |  |  | 3     | 9.9E-1  | 1.0E0     |
| <input type="checkbox"/> | GOTERM_MF_ALL          | <a href="#">endopeptidase inhibitor activity</a>             | <a href="#">RT</a> |  |  |  |  | 6     | 9.9E-1  | 1.0E0     |
| <input type="checkbox"/> | GOTERM_MF_ALL          | <a href="#">protease inhibitor activity</a>                  | <a href="#">RT</a> |  |  |  |  | 6     | 9.9E-1  | 1.0E0     |
| <input type="checkbox"/> | GOTERM_MF_ALL          | <a href="#">enzyme inhibitor activity</a>                    | <a href="#">RT</a> |  |  |  |  | 8     | 1.0E0   | 1.0E0     |
|                          | Annotation Cluster 215 | Enrichment Score: 0.03                                       | <b>G</b>           |  |  |  |  | Count | P_Value | Benjamini |
| <input type="checkbox"/> | GOTERM_CC_ALL          | <a href="#">transcription factor complex</a>                 | <a href="#">RT</a> |  |  |  |  | 30    | 8.3E-1  | 1.0E0     |
| <input type="checkbox"/> | GOTERM_CC_ALL          | <a href="#">nucleoplasm part</a>                             | <a href="#">RT</a> |  |  |  |  | 39    | 8.5E-1  | 1.0E0     |
| <input type="checkbox"/> | GOTERM_CC_ALL          | <a href="#">nucleoplasm</a>                                  | <a href="#">RT</a> |  |  |  |  | 41    | 8.7E-1  | 1.0E0     |
| <input type="checkbox"/> | GOTERM_CC_ALL          | <a href="#">nuclear lumen</a>                                | <a href="#">RT</a> |  |  |  |  | 46    | 9.6E-1  | 1.0E0     |
| <input type="checkbox"/> | GOTERM_CC_ALL          | <a href="#">nuclear part</a>                                 | <a href="#">RT</a> |  |  |  |  | 65    | 9.9E-1  | 1.0E0     |
| <input type="checkbox"/> | GOTERM_CC_ALL          | <a href="#">organelle lumen</a>                              | <a href="#">RT</a> |  |  |  |  | 49    | 9.9E-1  | 1.0E0     |
| <input type="checkbox"/> | GOTERM_CC_ALL          | <a href="#">membrane-enclosed lumen</a>                      | <a href="#">RT</a> |  |  |  |  | 49    | 9.9E-1  | 1.0E0     |
|                          | Annotation Cluster 216 | Enrichment Score: 0.03                                       | <b>G</b>           |  |  |  |  | Count | P_Value | Benjamini |
| <input type="checkbox"/> | INTERPRO               | <a href="#">EGF-like, laminin</a>                            | <a href="#">RT</a> |  |  |  |  | 3     | 8.5E-1  | 1.0E0     |
| <input type="checkbox"/> | SMART                  | <a href="#">EGF Lam</a>                                      | <a href="#">RT</a> |  |  |  |  | 3     | 9.3E-1  | 1.0E0     |
| <input type="checkbox"/> | INTERPRO               | <a href="#">EGF-like region</a>                              | <a href="#">RT</a> |  |  |  |  | 9     | 1.0E0   | 1.0E0     |
|                          | Annotation Cluster 217 | Enrichment Score: 0.03                                       | <b>G</b>           |  |  |  |  | Count | P_Value | Benjamini |
| <input type="checkbox"/> | GOTERM_BP_ALL          | <a href="#">response to external stimulus</a>                | <a href="#">RT</a> |  |  |  |  | 34    | 8.6E-1  | 1.0E0     |
| <input type="checkbox"/> | GOTERM_BP_ALL          | <a href="#">response to wounding</a>                         | <a href="#">RT</a> |  |  |  |  | 18    | 9.8E-1  | 1.0E0     |
| <input type="checkbox"/> | GOTERM_BP_ALL          | <a href="#">inflammatory response</a>                        | <a href="#">RT</a> |  |  |  |  | 12    | 9.8E-1  | 1.0E0     |
|                          | Annotation Cluster 218 | Enrichment Score: 0.03                                       | <b>G</b>           |  |  |  |  | Count | P_Value | Benjamini |
| <input type="checkbox"/> | GOTERM_CC_ALL          | <a href="#">synapse part</a>                                 | <a href="#">RT</a> |  |  |  |  | 8     | 8.2E-1  | 1.0E0     |
| <input type="checkbox"/> | GOTERM_CC_ALL          | <a href="#">synapse</a>                                      | <a href="#">RT</a> |  |  |  |  | 14    | 9.2E-1  | 1.0E0     |
| <input type="checkbox"/> | GOTERM_CC_ALL          | <a href="#">cell junction</a>                                | <a href="#">RT</a> |  |  |  |  | 23    | 9.4E-1  | 1.0E0     |
| <input type="checkbox"/> | GOTERM_CC_ALL          | <a href="#">postsynaptic membrane</a>                        | <a href="#">RT</a> |  |  |  |  | 5     | 9.7E-1  | 1.0E0     |
| <input type="checkbox"/> | SP_PIR_KEYWORDS        | <a href="#">Postsynaptic cell membrane</a>                   | <a href="#">RT</a> |  |  |  |  | 4     | 9.7E-1  | 1.0E0     |
| <input type="checkbox"/> | SP_PIR_KEYWORDS        | <a href="#">synapse</a>                                      | <a href="#">RT</a> |  |  |  |  | 7     | 9.9E-1  | 1.0E0     |
| <input type="checkbox"/> | SP_PIR_KEYWORDS        | <a href="#">cell junction</a>                                | <a href="#">RT</a> |  |  |  |  | 13    | 9.9E-1  | 1.0E0     |
|                          | Annotation Cluster 219 | Enrichment Score: 0.03                                       | <b>G</b>           |  |  |  |  | Count | P_Value | Benjamini |
| <input type="checkbox"/> | GOTERM_CC_ALL          | <a href="#">organelle membrane</a>                           | <a href="#">RT</a> |  |  |  |  | 44    | 8.1E-1  | 1.0E0     |
| <input type="checkbox"/> | GOTERM_CC_ALL          | <a href="#">mitochondrial membrane</a>                       | <a href="#">RT</a> |  |  |  |  | 16    | 9.3E-1  | 1.0E0     |
| <input type="checkbox"/> | GOTERM_CC_ALL          | <a href="#">mitochondrial envelope</a>                       | <a href="#">RT</a> |  |  |  |  | 17    | 9.4E-1  | 1.0E0     |
| <input type="checkbox"/> | GOTERM_CC_ALL          | <a href="#">mitochondrial inner membrane</a>                 | <a href="#">RT</a> |  |  |  |  | 14    | 9.4E-1  | 1.0E0     |
| <input type="checkbox"/> | GOTERM_CC_ALL          | <a href="#">organelle inner membrane</a>                     | <a href="#">RT</a> |  |  |  |  | 14    | 9.6E-1  | 1.0E0     |
| <input type="checkbox"/> | GOTERM_CC_ALL          | <a href="#">mitochondrial part</a>                           | <a href="#">RT</a> |  |  |  |  | 18    | 9.8E-1  | 1.0E0     |
| <input type="checkbox"/> | GOTERM_CC_ALL          | <a href="#">organelle envelope</a>                           | <a href="#">RT</a> |  |  |  |  | 22    | 9.9E-1  | 1.0E0     |

| <input type="checkbox"/> |                        |                                                            |                    |  |  |  |  |  |  |       |         |           |
|--------------------------|------------------------|------------------------------------------------------------|--------------------|--|--|--|--|--|--|-------|---------|-----------|
| <input type="checkbox"/> | GOTERM_CC_ALL          | <a href="#">envelope</a>                                   | <a href="#">RT</a> |  |  |  |  |  |  | 22    | 9.9E-1  | 1.0E0     |
|                          | Annotation Cluster 220 | Enrichment Score: 0.03                                     | <b>G</b>           |  |  |  |  |  |  | Count | P_Value | Benjamini |
| <input type="checkbox"/> | GOTERM_MF_ALL          | <a href="#">phospholipase activity</a>                     | <a href="#">RT</a> |  |  |  |  |  |  | 3     | 9.3E-1  | 1.0E0     |
| <input type="checkbox"/> | GOTERM_MF_ALL          | <a href="#">lipase activity</a>                            | <a href="#">RT</a> |  |  |  |  |  |  | 4     | 9.3E-1  | 1.0E0     |
| <input type="checkbox"/> | GOTERM_BP_ALL          | <a href="#">lipid catabolic process</a>                    | <a href="#">RT</a> |  |  |  |  |  |  | 6     | 9.3E-1  | 1.0E0     |
| <input type="checkbox"/> | GOTERM_MF_ALL          | <a href="#">carboxylesterase activity</a>                  | <a href="#">RT</a> |  |  |  |  |  |  | 5     | 9.8E-1  | 1.0E0     |
|                          | Annotation Cluster 221 | Enrichment Score: 0.02                                     | <b>G</b>           |  |  |  |  |  |  | Count | P_Value | Benjamini |
| <input type="checkbox"/> | GOTERM_BP_ALL          | <a href="#">protein import</a>                             | <a href="#">RT</a> |  |  |  |  |  |  | 5     | 9.0E-1  | 1.0E0     |
| <input type="checkbox"/> | GOTERM_BP_ALL          | <a href="#">protein import into nucleus</a>                | <a href="#">RT</a> |  |  |  |  |  |  | 4     | 9.1E-1  | 1.0E0     |
| <input type="checkbox"/> | GOTERM_BP_ALL          | <a href="#">nuclear import</a>                             | <a href="#">RT</a> |  |  |  |  |  |  | 4     | 9.2E-1  | 1.0E0     |
| <input type="checkbox"/> | GOTERM_BP_ALL          | <a href="#">nucleocytoplasmic transport</a>                | <a href="#">RT</a> |  |  |  |  |  |  | 4     | 1.0E0   | 1.0E0     |
| <input type="checkbox"/> | GOTERM_BP_ALL          | <a href="#">nuclear transport</a>                          | <a href="#">RT</a> |  |  |  |  |  |  | 4     | 1.0E0   | 1.0E0     |
|                          | Annotation Cluster 222 | Enrichment Score: 0.02                                     | <b>G</b>           |  |  |  |  |  |  | Count | P_Value | Benjamini |
| <input type="checkbox"/> | INTERPRO               | <a href="#">Immunoglobulin</a>                             | <a href="#">RT</a> |  |  |  |  |  |  | 11    | 8.3E-1  | 1.0E0     |
| <input type="checkbox"/> | UP_SEQ_FEATURE         | domain:Ig-like C2-type 2                                   | <a href="#">RT</a> |  |  |  |  |  |  | 5     | 8.8E-1  | 1.0E0     |
| <input type="checkbox"/> | UP_SEQ_FEATURE         | domain:Ig-like C2-type 1                                   | <a href="#">RT</a> |  |  |  |  |  |  | 5     | 8.8E-1  | 1.0E0     |
| <input type="checkbox"/> | INTERPRO               | <a href="#">Immunoglobulin-like fold</a>                   | <a href="#">RT</a> |  |  |  |  |  |  | 24    | 9.2E-1  | 1.0E0     |
| <input type="checkbox"/> | INTERPRO               | <a href="#">Immunoglobulin subtype 2</a>                   | <a href="#">RT</a> |  |  |  |  |  |  | 8     | 9.6E-1  | 1.0E0     |
| <input type="checkbox"/> | INTERPRO               | <a href="#">Immunoglobulin-like</a>                        | <a href="#">RT</a> |  |  |  |  |  |  | 19    | 9.8E-1  | 1.0E0     |
| <input type="checkbox"/> | SMART                  | <a href="#">IGc2</a>                                       | <a href="#">RT</a> |  |  |  |  |  |  | 9     | 9.9E-1  | 1.0E0     |
| <input type="checkbox"/> | SP_PIR_KEYWORDS        | <a href="#">immunoglobulin domain</a>                      | <a href="#">RT</a> |  |  |  |  |  |  | 18    | 9.9E-1  | 1.0E0     |
| <input type="checkbox"/> | INTERPRO               | <a href="#">Immunoglobulin I-set</a>                       | <a href="#">RT</a> |  |  |  |  |  |  | 4     | 9.9E-1  | 1.0E0     |
| <input type="checkbox"/> | INTERPRO               | <a href="#">Immunoglobulin subtype</a>                     | <a href="#">RT</a> |  |  |  |  |  |  | 9     | 1.0E0   | 1.0E0     |
| <input type="checkbox"/> | SMART                  | <a href="#">IG</a>                                         | <a href="#">RT</a> |  |  |  |  |  |  | 11    | 1.0E0   | 1.0E0     |
|                          | Annotation Cluster 223 | Enrichment Score: 0.02                                     | <b>G</b>           |  |  |  |  |  |  | Count | P_Value | Benjamini |
| <input type="checkbox"/> | GOTERM_BP_ALL          | <a href="#">microtubule-based process</a>                  | <a href="#">RT</a> |  |  |  |  |  |  | 13    | 8.6E-1  | 1.0E0     |
| <input type="checkbox"/> | GOTERM_CC_ALL          | <a href="#">microtubule cytoskeleton</a>                   | <a href="#">RT</a> |  |  |  |  |  |  | 19    | 9.3E-1  | 1.0E0     |
| <input type="checkbox"/> | GOTERM_CC_ALL          | <a href="#">microtubule</a>                                | <a href="#">RT</a> |  |  |  |  |  |  | 10    | 9.6E-1  | 1.0E0     |
| <input type="checkbox"/> | SP_PIR_KEYWORDS        | <a href="#">microtubule</a>                                | <a href="#">RT</a> |  |  |  |  |  |  | 7     | 9.7E-1  | 1.0E0     |
| <input type="checkbox"/> | GOTERM_CC_ALL          | <a href="#">cytoskeleton</a>                               | <a href="#">RT</a> |  |  |  |  |  |  | 47    | 1.0E0   | 1.0E0     |
| <input type="checkbox"/> | GOTERM_CC_ALL          | <a href="#">cytoskeletal part</a>                          | <a href="#">RT</a> |  |  |  |  |  |  | 25    | 1.0E0   | 1.0E0     |
|                          | Annotation Cluster 224 | Enrichment Score: 0.02                                     | <b>G</b>           |  |  |  |  |  |  | Count | P_Value | Benjamini |
| <input type="checkbox"/> | UP_SEQ_FEATURE         | repeat:5                                                   | <a href="#">RT</a> |  |  |  |  |  |  | 3     | 9.4E-1  | 1.0E0     |
| <input type="checkbox"/> | UP_SEQ_FEATURE         | repeat:3                                                   | <a href="#">RT</a> |  |  |  |  |  |  | 4     | 9.6E-1  | 1.0E0     |
| <input type="checkbox"/> | UP_SEQ_FEATURE         | repeat:1                                                   | <a href="#">RT</a> |  |  |  |  |  |  | 5     | 9.6E-1  | 1.0E0     |
| <input type="checkbox"/> | UP_SEQ_FEATURE         | repeat:2                                                   | <a href="#">RT</a> |  |  |  |  |  |  | 5     | 9.7E-1  | 1.0E0     |
| <input type="checkbox"/> | UP_SEQ_FEATURE         | repeat:4                                                   | <a href="#">RT</a> |  |  |  |  |  |  | 3     | 9.7E-1  | 1.0E0     |
|                          | Annotation Cluster 225 | Enrichment Score: 0.02                                     | <b>G</b>           |  |  |  |  |  |  | Count | P_Value | Benjamini |
| <input type="checkbox"/> | GOTERM_BP_ALL          | <a href="#">di-, tri-valent inorganic cation transport</a> | <a href="#">RT</a> |  |  |  |  |  |  | 8     | 9.5E-1  | 1.0E0     |
| <input type="checkbox"/> | SP_PIR_KEYWORDS        | <a href="#">calcium transport</a>                          | <a href="#">RT</a> |  |  |  |  |  |  | 3     | 9.5E-1  | 1.0E0     |
| <input type="checkbox"/> | GOTERM_BP_ALL          | <a href="#">calcium ion transport</a>                      | <a href="#">RT</a> |  |  |  |  |  |  | 5     | 9.8E-1  | 1.0E0     |
|                          | Annotation Cluster 226 | Enrichment Score: 0.02                                     | <b>G</b>           |  |  |  |  |  |  | Count | P_Value | Benjamini |
| <input type="checkbox"/> | GOTERM_BP_ALL          | <a href="#">sensory perception</a>                         | <a href="#">RT</a> |  |  |  |  |  |  | 19    | 8.8E-1  | 1.0E0     |
| <input type="checkbox"/> | GOTERM_BP_ALL          | <a href="#">transmission of nerve impulse</a>              | <a href="#">RT</a> |  |  |  |  |  |  | 15    | 9.5E-1  | 1.0E0     |
| <input type="checkbox"/> | GOTERM_BP_ALL          | <a href="#">neurological system process</a>                | <a href="#">RT</a> |  |  |  |  |  |  | 33    | 9.7E-1  | 1.0E0     |
| <input type="checkbox"/> | GOTERM_BP_ALL          | <a href="#">synaptic transmission</a>                      | <a href="#">RT</a> |  |  |  |  |  |  | 11    | 9.8E-1  | 1.0E0     |
| <input type="checkbox"/> | GOTERM_BP_ALL          | <a href="#">system process</a>                             | <a href="#">RT</a> |  |  |  |  |  |  | 42    | 9.9E-1  | 1.0E0     |
| <input type="checkbox"/> | GOTERM_BP_ALL          | <a href="#">cell-cell signaling</a>                        | <a href="#">RT</a> |  |  |  |  |  |  | 16    | 1.0E0   | 1.0E0     |
|                          | Annotation Cluster 227 | Enrichment Score: 0.02                                     | <b>G</b>           |  |  |  |  |  |  | Count | P_Value | Benjamini |
| <input type="checkbox"/> | GOTERM_BP_ALL          | <a href="#">wound healing</a>                              | <a href="#">RT</a> |  |  |  |  |  |  | 5     | 9.5E-1  | 1.0E0     |

| <input type="checkbox"/> |                        |                                                                         |                    |  |  |  |  |       |         |           |  |
|--------------------------|------------------------|-------------------------------------------------------------------------|--------------------|--|--|--|--|-------|---------|-----------|--|
| <input type="checkbox"/> | GOTERM_BP_ALL          | <a href="#">blood coagulation</a>                                       | <a href="#">RT</a> |  |  |  |  | 3     | 9.6E-1  | 1.0E0     |  |
| <input type="checkbox"/> | GOTERM_BP_ALL          | <a href="#">coagulation</a>                                             | <a href="#">RT</a> |  |  |  |  | 3     | 9.6E-1  | 1.0E0     |  |
| <input type="checkbox"/> | GOTERM_BP_ALL          | <a href="#">hemostasis</a>                                              | <a href="#">RT</a> |  |  |  |  | 3     | 9.6E-1  | 1.0E0     |  |
| <input type="checkbox"/> | GOTERM_BP_ALL          | <a href="#">regulation of body fluid levels</a>                         | <a href="#">RT</a> |  |  |  |  | 3     | 9.9E-1  | 1.0E0     |  |
|                          | Annotation Cluster 228 | Enrichment Score: 0.02                                                  | <b>G</b>           |  |  |  |  | Count | P_Value | Benjamini |  |
| <input type="checkbox"/> | GOTERM_BP_ALL          | <a href="#">protein localization</a>                                    | <a href="#">RT</a> |  |  |  |  | 56    | 8.7E-1  | 1.0E0     |  |
| <input type="checkbox"/> | GOTERM_BP_ALL          | <a href="#">macromolecule localization</a>                              | <a href="#">RT</a> |  |  |  |  | 57    | 9.0E-1  | 1.0E0     |  |
| <input type="checkbox"/> | SP_PIR_KEYWORDS        | <a href="#">transport</a>                                               | <a href="#">RT</a> |  |  |  |  | 61    | 1.0E0   | 1.0E0     |  |
| <input type="checkbox"/> | GOTERM_MF_ALL          | <a href="#">transporter activity</a>                                    | <a href="#">RT</a> |  |  |  |  | 63    | 1.0E0   | 1.0E0     |  |
| <input type="checkbox"/> | GOTERM_BP_ALL          | <a href="#">transport</a>                                               | <a href="#">RT</a> |  |  |  |  | 141   | 1.0E0   | 1.0E0     |  |
| <input type="checkbox"/> | GOTERM_BP_ALL          | <a href="#">localization</a>                                            | <a href="#">RT</a> |  |  |  |  | 168   | 1.0E0   | 1.0E0     |  |
| <input type="checkbox"/> | GOTERM_BP_ALL          | <a href="#">establishment of localization</a>                           | <a href="#">RT</a> |  |  |  |  | 143   | 1.0E0   | 1.0E0     |  |
|                          | Annotation Cluster 229 | Enrichment Score: 0.01                                                  | <b>G</b>           |  |  |  |  | Count | P_Value | Benjamini |  |
| <input type="checkbox"/> | GOTERM_BP_ALL          | <a href="#">ATP metabolic process</a>                                   | <a href="#">RT</a> |  |  |  |  | 3     | 9.2E-1  | 1.0E0     |  |
| <input type="checkbox"/> | GOTERM_BP_ALL          | <a href="#">purine ribonucleotide metabolic process</a>                 | <a href="#">RT</a> |  |  |  |  | 4     | 9.5E-1  | 1.0E0     |  |
| <input type="checkbox"/> | GOTERM_BP_ALL          | <a href="#">purine ribonucleoside triphosphate metabolic process</a>    | <a href="#">RT</a> |  |  |  |  | 3     | 9.6E-1  | 1.0E0     |  |
| <input type="checkbox"/> | GOTERM_BP_ALL          | <a href="#">nucleobase, nucleoside and nucleotide metabolic process</a> | <a href="#">RT</a> |  |  |  |  | 12    | 9.7E-1  | 1.0E0     |  |
| <input type="checkbox"/> | GOTERM_BP_ALL          | <a href="#">ribonucleoside triphosphate metabolic process</a>           | <a href="#">RT</a> |  |  |  |  | 3     | 9.7E-1  | 1.0E0     |  |
| <input type="checkbox"/> | GOTERM_BP_ALL          | <a href="#">purine nucleoside triphosphate metabolic process</a>        | <a href="#">RT</a> |  |  |  |  | 3     | 9.7E-1  | 1.0E0     |  |
| <input type="checkbox"/> | GOTERM_BP_ALL          | <a href="#">nucleotide metabolic process</a>                            | <a href="#">RT</a> |  |  |  |  | 11    | 9.7E-1  | 1.0E0     |  |
| <input type="checkbox"/> | GOTERM_BP_ALL          | <a href="#">ribonucleotide metabolic process</a>                        | <a href="#">RT</a> |  |  |  |  | 4     | 9.7E-1  | 1.0E0     |  |
| <input type="checkbox"/> | GOTERM_BP_ALL          | <a href="#">purine nucleotide metabolic process</a>                     | <a href="#">RT</a> |  |  |  |  | 4     | 9.8E-1  | 1.0E0     |  |
| <input type="checkbox"/> | GOTERM_BP_ALL          | <a href="#">purine ribonucleotide biosynthetic process</a>              | <a href="#">RT</a> |  |  |  |  | 3     | 9.8E-1  | 1.0E0     |  |
| <input type="checkbox"/> | GOTERM_BP_ALL          | <a href="#">nucleoside triphosphate metabolic process</a>               | <a href="#">RT</a> |  |  |  |  | 3     | 9.8E-1  | 1.0E0     |  |
| <input type="checkbox"/> | GOTERM_BP_ALL          | <a href="#">ribonucleotide biosynthetic process</a>                     | <a href="#">RT</a> |  |  |  |  | 3     | 9.9E-1  | 1.0E0     |  |
| <input type="checkbox"/> | GOTERM_BP_ALL          | <a href="#">purine nucleotide biosynthetic process</a>                  | <a href="#">RT</a> |  |  |  |  | 3     | 9.9E-1  | 1.0E0     |  |
| <input type="checkbox"/> | GOTERM_BP_ALL          | <a href="#">nucleotide biosynthetic process</a>                         | <a href="#">RT</a> |  |  |  |  | 5     | 1.0E0   | 1.0E0     |  |
|                          | Annotation Cluster 230 | Enrichment Score: 0.01                                                  | <b>G</b>           |  |  |  |  | Count | P_Value | Benjamini |  |
| <input type="checkbox"/> | GOTERM_BP_ALL          | <a href="#">Golgi vesicle transport</a>                                 | <a href="#">RT</a> |  |  |  |  | 5     | 9.2E-1  | 1.0E0     |  |
| <input type="checkbox"/> | GOTERM_BP_ALL          | <a href="#">secretory pathway</a>                                       | <a href="#">RT</a> |  |  |  |  | 11    | 9.9E-1  | 1.0E0     |  |
| <input type="checkbox"/> | GOTERM_BP_ALL          | <a href="#">secretion</a>                                               | <a href="#">RT</a> |  |  |  |  | 16    | 1.0E0   | 1.0E0     |  |
| <input type="checkbox"/> | GOTERM_BP_ALL          | <a href="#">secretion by cell</a>                                       | <a href="#">RT</a> |  |  |  |  | 12    | 1.0E0   | 1.0E0     |  |
|                          | Annotation Cluster 231 | Enrichment Score: 0.01                                                  | <b>G</b>           |  |  |  |  | Count | P_Value | Benjamini |  |
| <input type="checkbox"/> | GOTERM_MF_ALL          | <a href="#">actin binding</a>                                           | <a href="#">RT</a> |  |  |  |  | 15    | 9.7E-1  | 1.0E0     |  |
| <input type="checkbox"/> | SP_PIR_KEYWORDS        | <a href="#">actin-binding</a>                                           | <a href="#">RT</a> |  |  |  |  | 8     | 9.8E-1  | 1.0E0     |  |
| <input type="checkbox"/> | GOTERM_MF_ALL          | <a href="#">cytoskeletal protein binding</a>                            | <a href="#">RT</a> |  |  |  |  | 21    | 9.8E-1  | 1.0E0     |  |
|                          | Annotation Cluster 232 | Enrichment Score: 0.01                                                  | <b>G</b>           |  |  |  |  | Count | P_Value | Benjamini |  |
| <input type="checkbox"/> | GOTERM_MF_ALL          | <a href="#">sugar binding</a>                                           | <a href="#">RT</a> |  |  |  |  | 10    | 9.8E-1  | 1.0E0     |  |
| <input type="checkbox"/> | GOTERM_MF_ALL          | <a href="#">carbohydrate binding</a>                                    | <a href="#">RT</a> |  |  |  |  | 16    | 9.8E-1  | 1.0E0     |  |
| <input type="checkbox"/> | SP_PIR_KEYWORDS        | <a href="#">lectin</a>                                                  | <a href="#">RT</a> |  |  |  |  | 7     | 9.8E-1  | 1.0E0     |  |
|                          | Annotation Cluster 233 | Enrichment Score: 0.01                                                  | <b>G</b>           |  |  |  |  | Count | P_Value | Benjamini |  |
| <input type="checkbox"/> | GOTERM_BP_ALL          | <a href="#">neurotransmitter secretion</a>                              | <a href="#">RT</a> |  |  |  |  | 3     | 9.6E-1  | 1.0E0     |  |
| <input type="checkbox"/> | GOTERM_BP_ALL          | <a href="#">regulated secretory pathway</a>                             | <a href="#">RT</a> |  |  |  |  | 3     | 9.8E-1  | 1.0E0     |  |
| <input type="checkbox"/> | GOTERM_BP_ALL          | <a href="#">generation of a signal involved in cell-cell signaling</a>  | <a href="#">RT</a> |  |  |  |  | 4     | 9.9E-1  | 1.0E0     |  |
| <input type="checkbox"/> | GOTERM_BP_ALL          | <a href="#">regulation of neurotransmitter levels</a>                   | <a href="#">RT</a> |  |  |  |  | 4     | 9.9E-1  | 1.0E0     |  |
|                          | Annotation Cluster 234 | Enrichment Score: 0.01                                                  | <b>G</b>           |  |  |  |  | Count | P_Value | Benjamini |  |
| <input type="checkbox"/> | GOTERM_BP_ALL          | <a href="#">inner ear development</a>                                   | <a href="#">RT</a> |  |  |  |  | 3     | 9.8E-1  | 1.0E0     |  |
| <input type="checkbox"/> | GOTERM_BP_ALL          | <a href="#">sensory perception of sound</a>                             | <a href="#">RT</a> |  |  |  |  | 3     | 9.8E-1  | 1.0E0     |  |

| <input type="checkbox"/> | Annotation      | Term                                                                  | RT       |  | Count | P_Value | Benjamini |
|--------------------------|-----------------|-----------------------------------------------------------------------|----------|--|-------|---------|-----------|
| <input type="checkbox"/> | GOTERM_BP_ALL   | <a href="#">sensory organ development</a>                             | RT       |  | 9     | 9.8E-1  | 1.0E0     |
| <input type="checkbox"/> | GOTERM_BP_ALL   | <a href="#">ear development</a>                                       | RT       |  | 3     | 9.8E-1  | 1.0E0     |
| <input type="checkbox"/> | GOTERM_BP_ALL   | <a href="#">sensory perception of mechanical stimulus</a>             | RT       |  | 3     | 9.9E-1  | 1.0E0     |
| Annotation Cluster 235   |                 | Enrichment Score: 0.01                                                | <b>G</b> |  | Count | P_Value | Benjamini |
| <input type="checkbox"/> | GOTERM_BP_ALL   | <a href="#">amino acid and derivative metabolic process</a>           | RT       |  | 19    | 9.7E-1  | 1.0E0     |
| <input type="checkbox"/> | GOTERM_BP_ALL   | <a href="#">amino acid metabolic process</a>                          | RT       |  | 14    | 9.8E-1  | 1.0E0     |
| <input type="checkbox"/> | GOTERM_BP_ALL   | <a href="#">nitrogen compound metabolic process</a>                   | RT       |  | 23    | 9.9E-1  | 1.0E0     |
| <input type="checkbox"/> | GOTERM_BP_ALL   | <a href="#">amine metabolic process</a>                               | RT       |  | 20    | 9.9E-1  | 1.0E0     |
| Annotation Cluster 236   |                 | Enrichment Score: 0.01                                                | <b>G</b> |  | Count | P_Value | Benjamini |
| <input type="checkbox"/> | SP_PIR_KEYWORDS | <a href="#">sodium transport</a>                                      | RT       |  | 4     | 9.4E-1  | 1.0E0     |
| <input type="checkbox"/> | GOTERM_BP_ALL   | <a href="#">sodium ion transport</a>                                  | RT       |  | 6     | 9.4E-1  | 1.0E0     |
| <input type="checkbox"/> | SP_PIR_KEYWORDS | <a href="#">sodium</a>                                                | RT       |  | 3     | 9.7E-1  | 1.0E0     |
| <input type="checkbox"/> | GOTERM_MF_ALL   | <a href="#">sodium ion binding</a>                                    | RT       |  | 3     | 9.9E-1  | 1.0E0     |
| <input type="checkbox"/> | SP_PIR_KEYWORDS | <a href="#">potassium transport</a>                                   | RT       |  | 3     | 9.9E-1  | 1.0E0     |
| <input type="checkbox"/> | GOTERM_BP_ALL   | <a href="#">potassium ion transport</a>                               | RT       |  | 6     | 1.0E0   | 1.0E0     |
| <input type="checkbox"/> | SP_PIR_KEYWORDS | <a href="#">potassium</a>                                             | RT       |  | 3     | 1.0E0   | 1.0E0     |
| <input type="checkbox"/> | GOTERM_MF_ALL   | <a href="#">potassium ion binding</a>                                 | RT       |  | 3     | 1.0E0   | 1.0E0     |
| <input type="checkbox"/> | GOTERM_MF_ALL   | <a href="#">alkali metal ion binding</a>                              | RT       |  | 5     | 1.0E0   | 1.0E0     |
| <input type="checkbox"/> | GOTERM_BP_ALL   | <a href="#">monovalent inorganic cation transport</a>                 | RT       |  | 11    | 1.0E0   | 1.0E0     |
| Annotation Cluster 237   |                 | Enrichment Score: 0                                                   | <b>G</b> |  | Count | P_Value | Benjamini |
| <input type="checkbox"/> | GOTERM_MF_ALL   | <a href="#">heparin binding</a>                                       | RT       |  | 3     | 9.8E-1  | 1.0E0     |
| <input type="checkbox"/> | GOTERM_MF_ALL   | <a href="#">pattern binding</a>                                       | RT       |  | 4     | 9.9E-1  | 1.0E0     |
| <input type="checkbox"/> | GOTERM_MF_ALL   | <a href="#">glycosaminoglycan binding</a>                             | RT       |  | 3     | 9.9E-1  | 1.0E0     |
| <input type="checkbox"/> | GOTERM_MF_ALL   | <a href="#">polysaccharide binding</a>                                | RT       |  | 3     | 1.0E0   | 1.0E0     |
| Annotation Cluster 238   |                 | Enrichment Score: 0                                                   | <b>G</b> |  | Count | P_Value | Benjamini |
| <input type="checkbox"/> | INTERPRO        | <a href="#">Homeobox</a>                                              | RT       |  | 9     | 9.9E-1  | 1.0E0     |
| <input type="checkbox"/> | SP_PIR_KEYWORDS | <a href="#">Homeobox</a>                                              | RT       |  | 11    | 9.9E-1  | 1.0E0     |
| <input type="checkbox"/> | INTERPRO        | <a href="#">Helix-turn-helix motif, lambda-like repressor</a>         | RT       |  | 3     | 9.9E-1  | 1.0E0     |
| <input type="checkbox"/> | UP_SEQ_FEATURE  | DNA-binding region:Homeobox                                           | RT       |  | 5     | 1.0E0   | 1.0E0     |
| <input type="checkbox"/> | SMART           | <a href="#">HOX</a>                                                   | RT       |  | 9     | 1.0E0   | 1.0E0     |
| <input type="checkbox"/> | INTERPRO        | <a href="#">Homeodomain-related</a>                                   | RT       |  | 6     | 1.0E0   | 1.0E0     |
| Annotation Cluster 239   |                 | Enrichment Score: 0                                                   | <b>G</b> |  | Count | P_Value | Benjamini |
| <input type="checkbox"/> | GOTERM_CC_ALL   | <a href="#">plasma membrane part</a>                                  | RT       |  | 78    | 9.9E-1  | 1.0E0     |
| <input type="checkbox"/> | GOTERM_CC_ALL   | <a href="#">integral to plasma membrane</a>                           | RT       |  | 32    | 9.9E-1  | 1.0E0     |
| <input type="checkbox"/> | GOTERM_CC_ALL   | <a href="#">intrinsic to plasma membrane</a>                          | RT       |  | 33    | 9.9E-1  | 1.0E0     |
| Annotation Cluster 240   |                 | Enrichment Score: 0                                                   | <b>G</b> |  | Count | P_Value | Benjamini |
| <input type="checkbox"/> | SP_PIR_KEYWORDS | <a href="#">lectin</a>                                                | RT       |  | 7     | 9.8E-1  | 1.0E0     |
| <input type="checkbox"/> | INTERPRO        | <a href="#">C-type lectin</a>                                         | RT       |  | 3     | 1.0E0   | 1.0E0     |
| <input type="checkbox"/> | SMART           | <a href="#">CLECT</a>                                                 | RT       |  | 3     | 1.0E0   | 1.0E0     |
| Annotation Cluster 241   |                 | Enrichment Score: 0                                                   | <b>G</b> |  | Count | P_Value | Benjamini |
| <input type="checkbox"/> | GOTERM_BP_ALL   | <a href="#">sodium ion transport</a>                                  | RT       |  | 6     | 9.4E-1  | 1.0E0     |
| <input type="checkbox"/> | GOTERM_BP_ALL   | <a href="#">metal ion transport</a>                                   | RT       |  | 18    | 1.0E0   | 1.0E0     |
| <input type="checkbox"/> | GOTERM_BP_ALL   | <a href="#">monovalent inorganic cation transport</a>                 | RT       |  | 11    | 1.0E0   | 1.0E0     |
| <input type="checkbox"/> | GOTERM_BP_ALL   | <a href="#">cation transport</a>                                      | RT       |  | 21    | 1.0E0   | 1.0E0     |
| <input type="checkbox"/> | GOTERM_MF_ALL   | <a href="#">substrate-specific transporter activity</a>               | RT       |  | 48    | 1.0E0   | 1.0E0     |
| <input type="checkbox"/> | SP_PIR_KEYWORDS | <a href="#">ion transport</a>                                         | RT       |  | 16    | 1.0E0   | 1.0E0     |
| <input type="checkbox"/> | GOTERM_MF_ALL   | <a href="#">substrate-specific transmembrane transporter activity</a> | RT       |  | 32    | 1.0E0   | 1.0E0     |
| <input type="checkbox"/> | GOTERM_MF_ALL   | <a href="#">cation transmembrane transporter activity</a>             | RT       |  | 17    | 1.0E0   | 1.0E0     |
| <input type="checkbox"/> | GOTERM_MF_ALL   | <a href="#">transmembrane transporter activity</a>                    | RT       |  | 39    | 1.0E0   | 1.0E0     |

| <input type="checkbox"/> |                        |                                                              |                    |  |  |  |       |         |           |
|--------------------------|------------------------|--------------------------------------------------------------|--------------------|--|--|--|-------|---------|-----------|
| <input type="checkbox"/> | GOTERM_MF_ALL          | <a href="#">ion transmembrane transporter activity</a>       | <a href="#">RT</a> |  |  |  | 24    | 1.0E0   | 1.0E0     |
| <input type="checkbox"/> | GOTERM_MF_ALL          | <a href="#">transporter activity</a>                         | <a href="#">RT</a> |  |  |  | 63    | 1.0E0   | 1.0E0     |
| <input type="checkbox"/> | GOTERM_BP_ALL          | <a href="#">ion transport</a>                                | <a href="#">RT</a> |  |  |  | 25    | 1.0E0   | 1.0E0     |
|                          | Annotation Cluster 242 | Enrichment Score: 0                                          | <b>G</b>           |  |  |  | Count | P_Value | Benjamini |
| <input type="checkbox"/> | GOTERM_CC_ALL          | <a href="#">nuclear part</a>                                 | <a href="#">RT</a> |  |  |  | 65    | 9.9E-1  | 1.0E0     |
| <input type="checkbox"/> | GOTERM_CC_ALL          | <a href="#">organelle part</a>                               | <a href="#">RT</a> |  |  |  | 156   | 1.0E0   | 1.0E0     |
| <input type="checkbox"/> | GOTERM_CC_ALL          | <a href="#">intracellular organelle part</a>                 | <a href="#">RT</a> |  |  |  | 154   | 1.0E0   | 1.0E0     |
| <input type="checkbox"/> | GOTERM_CC_ALL          | <a href="#">macromolecular complex</a>                       | <a href="#">RT</a> |  |  |  | 119   | 1.0E0   | 1.0E0     |
|                          | Annotation Cluster 243 | Enrichment Score: 0                                          | <b>G</b>           |  |  |  | Count | P_Value | Benjamini |
| <input type="checkbox"/> | GOTERM_MF_ALL          | <a href="#">calcium channel activity</a>                     | <a href="#">RT</a> |  |  |  | 3     | 9.7E-1  | 1.0E0     |
| <input type="checkbox"/> | GOTERM_BP_ALL          | <a href="#">calcium ion transport</a>                        | <a href="#">RT</a> |  |  |  | 5     | 9.8E-1  | 1.0E0     |
| <input type="checkbox"/> | GOTERM_MF_ALL          | <a href="#">voltage-gated cation channel activity</a>        | <a href="#">RT</a> |  |  |  | 4     | 1.0E0   | 1.0E0     |
| <input type="checkbox"/> | GOTERM_MF_ALL          | <a href="#">voltage-gated ion channel activity</a>           | <a href="#">RT</a> |  |  |  | 5     | 1.0E0   | 1.0E0     |
| <input type="checkbox"/> | GOTERM_MF_ALL          | <a href="#">voltage-gated channel activity</a>               | <a href="#">RT</a> |  |  |  | 5     | 1.0E0   | 1.0E0     |
| <input type="checkbox"/> | SP_PIR_KEYWORDS        | <a href="#">voltage-gated channel</a>                        | <a href="#">RT</a> |  |  |  | 3     | 1.0E0   | 1.0E0     |
| <input type="checkbox"/> | GOTERM_MF_ALL          | <a href="#">metal ion transmembrane transporter activity</a> | <a href="#">RT</a> |  |  |  | 7     | 1.0E0   | 1.0E0     |
| <input type="checkbox"/> | GOTERM_MF_ALL          | <a href="#">gated channel activity</a>                       | <a href="#">RT</a> |  |  |  | 6     | 1.0E0   | 1.0E0     |
| <input type="checkbox"/> | GOTERM_MF_ALL          | <a href="#">cation channel activity</a>                      | <a href="#">RT</a> |  |  |  | 5     | 1.0E0   | 1.0E0     |
| <input type="checkbox"/> | SP_PIR_KEYWORDS        | <a href="#">Ionic channel</a>                                | <a href="#">RT</a> |  |  |  | 4     | 1.0E0   | 1.0E0     |
| <input type="checkbox"/> | GOTERM_MF_ALL          | <a href="#">ion channel activity</a>                         | <a href="#">RT</a> |  |  |  | 6     | 1.0E0   | 1.0E0     |
| <input type="checkbox"/> | GOTERM_MF_ALL          | <a href="#">substrate specific channel activity</a>          | <a href="#">RT</a> |  |  |  | 6     | 1.0E0   | 1.0E0     |
| <input type="checkbox"/> | GOTERM_MF_ALL          | <a href="#">passive transmembrane transporter activity</a>   | <a href="#">RT</a> |  |  |  | 6     | 1.0E0   | 1.0E0     |
| <input type="checkbox"/> | GOTERM_MF_ALL          | <a href="#">channel activity</a>                             | <a href="#">RT</a> |  |  |  | 6     | 1.0E0   | 1.0E0     |
|                          | Annotation Cluster 244 | Enrichment Score: 0                                          | <b>G</b>           |  |  |  | Count | P_Value | Benjamini |
| <input type="checkbox"/> | UP_SEQ_FEATURE         | topological domain:Cytoplasmic                               | <a href="#">RT</a> |  |  |  | 103   | 9.9E-1  | 1.0E0     |
| <input type="checkbox"/> | SP_PIR_KEYWORDS        | <a href="#">transmembrane</a>                                | <a href="#">RT</a> |  |  |  | 219   | 9.9E-1  | 1.0E0     |
| <input type="checkbox"/> | SP_PIR_KEYWORDS        | <a href="#">membrane</a>                                     | <a href="#">RT</a> |  |  |  | 281   | 1.0E0   | 1.0E0     |
| <input type="checkbox"/> | UP_SEQ_FEATURE         | topological domain:Extracellular                             | <a href="#">RT</a> |  |  |  | 74    | 1.0E0   | 1.0E0     |
| <input type="checkbox"/> | GOTERM_CC_ALL          | <a href="#">integral to membrane</a>                         | <a href="#">RT</a> |  |  |  | 275   | 1.0E0   | 1.0E0     |
| <input type="checkbox"/> | UP_SEQ_FEATURE         | transmembrane region                                         | <a href="#">RT</a> |  |  |  | 132   | 1.0E0   | 1.0E0     |
| <input type="checkbox"/> | GOTERM_CC_ALL          | <a href="#">membrane part</a>                                | <a href="#">RT</a> |  |  |  | 314   | 1.0E0   | 1.0E0     |
| <input type="checkbox"/> | GOTERM_CC_ALL          | <a href="#">intrinsic to membrane</a>                        | <a href="#">RT</a> |  |  |  | 276   | 1.0E0   | 1.0E0     |
| <input type="checkbox"/> | UP_SEQ_FEATURE         | glycosylation site:N-linked (GlcNAc...)                      | <a href="#">RT</a> |  |  |  | 126   | 1.0E0   | 1.0E0     |
| <input type="checkbox"/> | UP_SEQ_FEATURE         | disulfide bond                                               | <a href="#">RT</a> |  |  |  | 86    | 1.0E0   | 1.0E0     |
| <input type="checkbox"/> | UP_SEQ_FEATURE         | signal peptide                                               | <a href="#">RT</a> |  |  |  | 105   | 1.0E0   | 1.0E0     |
| <input type="checkbox"/> | GOTERM_CC_ALL          | <a href="#">membrane</a>                                     | <a href="#">RT</a> |  |  |  | 388   | 1.0E0   | 1.0E0     |
| <input type="checkbox"/> | SP_PIR_KEYWORDS        | <a href="#">glycoprotein</a>                                 | <a href="#">RT</a> |  |  |  | 161   | 1.0E0   | 1.0E0     |
| <input type="checkbox"/> | SP_PIR_KEYWORDS        | <a href="#">signal</a>                                       | <a href="#">RT</a> |  |  |  | 130   | 1.0E0   | 1.0E0     |
|                          | Annotation Cluster 245 | Enrichment Score: 0                                          | <b>G</b>           |  |  |  | Count | P_Value | Benjamini |
| <input type="checkbox"/> | INTERPRO               | <a href="#">Peptidase S1 and S6, chymotrypsin/Hap</a>        | <a href="#">RT</a> |  |  |  | 3     | 1.0E0   | 1.0E0     |
| <input type="checkbox"/> | GOTERM_MF_ALL          | <a href="#">serine hydrolase activity</a>                    | <a href="#">RT</a> |  |  |  | 6     | 1.0E0   | 1.0E0     |
| <input type="checkbox"/> | GOTERM_MF_ALL          | <a href="#">serine-type peptidase activity</a>               | <a href="#">RT</a> |  |  |  | 6     | 1.0E0   | 1.0E0     |
| <input type="checkbox"/> | GOTERM_MF_ALL          | <a href="#">serine-type endopeptidase activity</a>           | <a href="#">RT</a> |  |  |  | 5     | 1.0E0   | 1.0E0     |
| <input type="checkbox"/> | SMART                  | <a href="#">Tryp_SPC</a>                                     | <a href="#">RT</a> |  |  |  | 3     | 1.0E0   | 1.0E0     |
|                          | Annotation Cluster 246 | Enrichment Score: 0                                          | <b>G</b>           |  |  |  | Count | P_Value | Benjamini |
| <input type="checkbox"/> | UP_SEQ_FEATURE         | signal peptide                                               | <a href="#">RT</a> |  |  |  | 105   | 1.0E0   | 1.0E0     |
| <input type="checkbox"/> | SP_PIR_KEYWORDS        | <a href="#">Secreted</a>                                     | <a href="#">RT</a> |  |  |  | 55    | 1.0E0   | 1.0E0     |
| <input type="checkbox"/> | SP_PIR_KEYWORDS        | <a href="#">signal</a>                                       | <a href="#">RT</a> |  |  |  | 130   | 1.0E0   | 1.0E0     |
| <input type="checkbox"/> | GOTERM_CC_ALL          | <a href="#">extracellular space</a>                          | <a href="#">RT</a> |  |  |  | 96    | 1.0E0   | 1.0E0     |

|                          |               |                                           |                    |                                                                                   |     |       |       |
|--------------------------|---------------|-------------------------------------------|--------------------|-----------------------------------------------------------------------------------|-----|-------|-------|
| <input type="checkbox"/> | GOTERM_CC_ALL | <a href="#">extracellular region part</a> | <a href="#">RT</a> |  | 102 | 1.0E0 | 1.0E0 |
| <input type="checkbox"/> | GOTERM_CC_ALL | <a href="#">extracellular region</a>      | <a href="#">RT</a> |  | 110 | 1.0E0 | 1.0E0 |

560 terms were not clustered.

Please cite the web site or [Genome Biology 2003; 4\(5\):P3](#) within any publication that makes use of any methods inspired by **DAVID**.

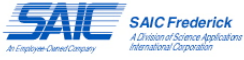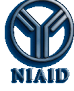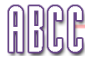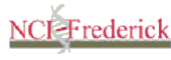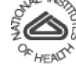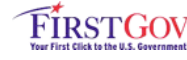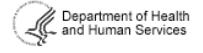

[Term of Service](#) | [Contact Us](#) | [Site Map](#)



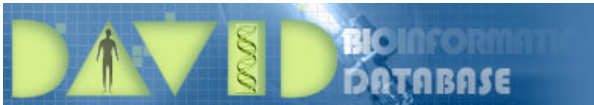

## Functional Annotation Clustering Of Genes Downregulated <0.5 in WASP Deficient BMDCs

[Help and Manual](#)

Current Gene List: **wsp down <.5**

1948 DAVID IDs

Options Classification Stringency Medium

Rerun using options

Create Sublist

[Download File](#)

| Annotation Cluster 1     |                 | Enrichment Score: 5.75                                                                                       |    | G |  | Count | P_Value | Benjamini |
|--------------------------|-----------------|--------------------------------------------------------------------------------------------------------------|----|---|--|-------|---------|-----------|
| <input type="checkbox"/> | SP_PIR_KEYWORDS | <a href="#">zinc-finger</a>                                                                                  | RT |   |  | 173   | 9.0E-12 | 7.8E-9    |
| <input type="checkbox"/> | SP_PIR_KEYWORDS | <a href="#">zinc</a>                                                                                         | RT |   |  | 192   | 5.7E-8  | 2.5E-5    |
| <input type="checkbox"/> | GOTERM_MF_ALL   | <a href="#">transition metal ion binding</a>                                                                 | RT |   |  | 268   | 4.4E-7  | 1.2E-3    |
| <input type="checkbox"/> | SP_PIR_KEYWORDS | <a href="#">metal-binding</a>                                                                                | RT |   |  | 245   | 5.9E-7  | 1.7E-4    |
| <input type="checkbox"/> | GOTERM_MF_ALL   | <a href="#">zinc ion binding</a>                                                                             | RT |   |  | 221   | 8.2E-7  | 1.1E-3    |
| <input type="checkbox"/> | GOTERM_MF_ALL   | <a href="#">metal ion binding</a>                                                                            | RT |   |  | 357   | 7.0E-4  | 2.7E-1    |
| <input type="checkbox"/> | GOTERM_MF_ALL   | <a href="#">ion binding</a>                                                                                  | RT |   |  | 362   | 1.1E-3  | 3.4E-1    |
| <input type="checkbox"/> | GOTERM_MF_ALL   | <a href="#">cation binding</a>                                                                               | RT |   |  | 330   | 1.1E-3  | 3.1E-1    |
| Annotation Cluster 2     |                 | Enrichment Score: 4.51                                                                                       |    | G |  | Count | P_Value | Benjamini |
| <input type="checkbox"/> | GOTERM_BP_ALL   | <a href="#">immune system process</a>                                                                        | RT |   |  | 106   | 1.6E-7  | 1.4E-4    |
| <input type="checkbox"/> | GOTERM_BP_ALL   | <a href="#">immune response</a>                                                                              | RT |   |  | 66    | 3.8E-5  | 9.3E-3    |
| <input type="checkbox"/> | GOTERM_BP_ALL   | <a href="#">response to stimulus</a>                                                                         | RT |   |  | 185   | 4.9E-3  | 3.3E-1    |
| Annotation Cluster 3     |                 | Enrichment Score: 3.95                                                                                       |    | G |  | Count | P_Value | Benjamini |
| <input type="checkbox"/> | SP_PIR_KEYWORDS | <a href="#">lysosome</a>                                                                                     | RT |   |  | 25    | 3.7E-5  | 8.0E-3    |
| <input type="checkbox"/> | GOTERM_CC_ALL   | <a href="#">vacuole</a>                                                                                      | RT |   |  | 36    | 4.7E-5  | 3.6E-2    |
| <input type="checkbox"/> | GOTERM_CC_ALL   | <a href="#">lysosome</a>                                                                                     | RT |   |  | 31    | 3.1E-4  | 7.6E-2    |
| <input type="checkbox"/> | GOTERM_CC_ALL   | <a href="#">lytic vacuole</a>                                                                                | RT |   |  | 31    | 3.1E-4  | 7.6E-2    |
| Annotation Cluster 4     |                 | Enrichment Score: 3.46                                                                                       |    | G |  | Count | P_Value | Benjamini |
| <input type="checkbox"/> | GOTERM_BP_ALL   | <a href="#">establishment and/or maintenance of chromatin architecture</a>                                   | RT |   |  | 49    | 6.1E-8  | 7.9E-5    |
| <input type="checkbox"/> | GOTERM_BP_ALL   | <a href="#">DNA packaging</a>                                                                                | RT |   |  | 49    | 1.5E-7  | 1.5E-4    |
| <input type="checkbox"/> | GOTERM_BP_ALL   | <a href="#">chromatin modification</a>                                                                       | RT |   |  | 36    | 4.2E-6  | 2.2E-3    |
| <input type="checkbox"/> | GOTERM_BP_ALL   | <a href="#">chromosome organization and biogenesis</a>                                                       | RT |   |  | 52    | 1.7E-5  | 6.7E-3    |
| <input type="checkbox"/> | GOTERM_BP_ALL   | <a href="#">chromatin assembly or disassembly</a>                                                            | RT |   |  | 20    | 1.3E-3  | 1.6E-1    |
| <input type="checkbox"/> | GOTERM_BP_ALL   | <a href="#">DNA metabolic process</a>                                                                        | RT |   |  | 75    | 3.0E-3  | 2.6E-1    |
| <input type="checkbox"/> | GOTERM_CC_ALL   | <a href="#">chromatin</a>                                                                                    | RT |   |  | 25    | 4.7E-3  | 4.0E-1    |
| <input type="checkbox"/> | SP_PIR_KEYWORDS | <a href="#">Chromatin regulator</a>                                                                          | RT |   |  | 18    | 5.6E-3  | 2.3E-1    |
| <input type="checkbox"/> | GOTERM_CC_ALL   | <a href="#">chromosomal part</a>                                                                             | RT |   |  | 35    | 2.1E-2  | 6.4E-1    |
| <input type="checkbox"/> | GOTERM_CC_ALL   | <a href="#">chromosome</a>                                                                                   | RT |   |  | 39    | 2.2E-2  | 6.2E-1    |
| <input type="checkbox"/> | GOTERM_BP_ALL   | <a href="#">organelle organization and biogenesis</a>                                                        | RT |   |  | 102   | 3.1E-1  | 9.8E-1    |
| Annotation Cluster 5     |                 | Enrichment Score: 3.35                                                                                       |    | G |  | Count | P_Value | Benjamini |
| <input type="checkbox"/> | GOTERM_BP_ALL   | <a href="#">negative regulation of cellular process</a>                                                      | RT |   |  | 131   | 1.7E-7  | 1.3E-4    |
| <input type="checkbox"/> | GOTERM_BP_ALL   | <a href="#">negative regulation of biological process</a>                                                    | RT |   |  | 135   | 9.8E-7  | 6.3E-4    |
| <input type="checkbox"/> | GOTERM_MF_ALL   | <a href="#">transcription repressor activity</a>                                                             | RT |   |  | 32    | 7.5E-5  | 6.5E-2    |
| <input type="checkbox"/> | GOTERM_BP_ALL   | <a href="#">negative regulation of transcription</a>                                                         | RT |   |  | 41    | 1.5E-3  | 1.7E-1    |
| <input type="checkbox"/> | GOTERM_BP_ALL   | <a href="#">negative regulation of transcription, DNA-dependent</a>                                          | RT |   |  | 32    | 2.9E-3  | 2.6E-1    |
| <input type="checkbox"/> | GOTERM_BP_ALL   | <a href="#">negative regulation of nucleobase, nucleoside, nucleotide and nucleic acid metabolic process</a> | RT |   |  | 42    | 3.0E-3  | 2.7E-1    |
| <input type="checkbox"/> | GOTERM_BP_ALL   | <a href="#">negative regulation of cellular metabolic process</a>                                            | RT |   |  | 46    | 5.9E-3  | 3.5E-1    |

|                          |                 |                                                                                                     |          |  | Count | P_Value | Benjamini |
|--------------------------|-----------------|-----------------------------------------------------------------------------------------------------|----------|--|-------|---------|-----------|
| <input type="checkbox"/> | GOTERM_BP_ALL   | <a href="#">negative regulation of metabolic process</a>                                            | RT       |  | 49    | 1.3E-2  | 4.8E-1    |
| <input type="checkbox"/> | GOTERM_BP_ALL   | <a href="#">negative regulation of transcription from RNA polymerase II promoter</a>                | RT       |  | 20    | 6.0E-2  | 8.0E-1    |
| Annotation Cluster 6     |                 | Enrichment Score: 3.33                                                                              | <b>G</b> |  |       |         |           |
| <input type="checkbox"/> | GOTERM_BP_ALL   | <a href="#">regulation of cellular process</a>                                                      | RT       |  | 411   | 1.8E-10 | 9.4E-7    |
| <input type="checkbox"/> | GOTERM_BP_ALL   | <a href="#">biological regulation</a>                                                               | RT       |  | 469   | 1.7E-8  | 4.3E-5    |
| <input type="checkbox"/> | GOTERM_BP_ALL   | <a href="#">regulation of biological process</a>                                                    | RT       |  | 431   | 5.2E-8  | 9.0E-5    |
| <input type="checkbox"/> | GOTERM_BP_ALL   | <a href="#">biopolymer metabolic process</a>                                                        | RT       |  | 452   | 9.2E-6  | 4.0E-3    |
| <input type="checkbox"/> | GOTERM_BP_ALL   | <a href="#">regulation of nucleobase, nucleoside, nucleotide and nucleic acid metabolic process</a> | RT       |  | 244   | 3.4E-5  | 1.0E-2    |
| <input type="checkbox"/> | GOTERM_BP_ALL   | <a href="#">regulation of cellular metabolic process</a>                                            | RT       |  | 263   | 3.5E-5  | 1.0E-2    |
| <input type="checkbox"/> | GOTERM_BP_ALL   | <a href="#">regulation of transcription</a>                                                         | RT       |  | 238   | 6.9E-5  | 1.4E-2    |
| <input type="checkbox"/> | GOTERM_BP_ALL   | <a href="#">regulation of transcription, DNA-dependent</a>                                          | RT       |  | 227   | 9.8E-5  | 1.8E-2    |
| <input type="checkbox"/> | GOTERM_BP_ALL   | <a href="#">regulation of metabolic process</a>                                                     | RT       |  | 269   | 1.0E-4  | 1.8E-2    |
| <input type="checkbox"/> | GOTERM_BP_ALL   | <a href="#">regulation of gene expression</a>                                                       | RT       |  | 250   | 1.2E-4  | 2.0E-2    |
| <input type="checkbox"/> | GOTERM_BP_ALL   | <a href="#">transcription</a>                                                                       | RT       |  | 243   | 1.2E-4  | 2.0E-2    |
| <input type="checkbox"/> | SP_PIR_KEYWORDS | <a href="#">Transcription regulation</a>                                                            | RT       |  | 145   | 1.4E-4  | 2.0E-2    |
| <input type="checkbox"/> | GOTERM_BP_ALL   | <a href="#">transcription, DNA-dependent</a>                                                        | RT       |  | 228   | 1.5E-4  | 2.3E-2    |
| <input type="checkbox"/> | GOTERM_BP_ALL   | <a href="#">RNA biosynthetic process</a>                                                            | RT       |  | 228   | 1.7E-4  | 2.5E-2    |
| <input type="checkbox"/> | SP_PIR_KEYWORDS | <a href="#">Transcription</a>                                                                       | RT       |  | 146   | 2.3E-4  | 2.4E-2    |
| <input type="checkbox"/> | SP_PIR_KEYWORDS | <a href="#">dna-binding</a>                                                                         | RT       |  | 136   | 4.9E-3  | 2.1E-1    |
| <input type="checkbox"/> | GOTERM_BP_ALL   | <a href="#">primary metabolic process</a>                                                           | RT       |  | 627   | 6.1E-3  | 3.6E-1    |
| <input type="checkbox"/> | GOTERM_BP_ALL   | <a href="#">macromolecule metabolic process</a>                                                     | RT       |  | 549   | 9.9E-3  | 4.4E-1    |
| <input type="checkbox"/> | GOTERM_MF_ALL   | <a href="#">DNA binding</a>                                                                         | RT       |  | 195   | 1.0E-2  | 7.5E-1    |
| <input type="checkbox"/> | GOTERM_CC_ALL   | <a href="#">nucleus</a>                                                                             | RT       |  | 368   | 1.9E-2  | 6.8E-1    |
| <input type="checkbox"/> | GOTERM_MF_ALL   | <a href="#">nucleic acid binding</a>                                                                | RT       |  | 291   | 2.1E-2  | 8.3E-1    |
| <input type="checkbox"/> | GOTERM_BP_ALL   | <a href="#">nucleobase, nucleoside, nucleotide and nucleic acid metabolic process</a>               | RT       |  | 312   | 2.9E-2  | 6.4E-1    |
| <input type="checkbox"/> | GOTERM_MF_ALL   | <a href="#">transcription regulator activity</a>                                                    | RT       |  | 128   | 3.3E-2  | 9.1E-1    |
| <input type="checkbox"/> | GOTERM_BP_ALL   | <a href="#">RNA metabolic process</a>                                                               | RT       |  | 243   | 4.6E-2  | 7.5E-1    |
| <input type="checkbox"/> | SP_PIR_KEYWORDS | <a href="#">nucleus</a>                                                                             | RT       |  | 287   | 4.9E-2  | 6.9E-1    |
| <input type="checkbox"/> | GOTERM_MF_ALL   | <a href="#">sequence-specific DNA binding</a>                                                       | RT       |  | 49    | 1.9E-1  | 1.0E0     |
| <input type="checkbox"/> | GOTERM_BP_ALL   | <a href="#">gene expression</a>                                                                     | RT       |  | 272   | 2.5E-1  | 9.6E-1    |
| <input type="checkbox"/> | GOTERM_MF_ALL   | <a href="#">transcription factor activity</a>                                                       | RT       |  | 84    | 2.9E-1  | 1.0E0     |
| Annotation Cluster 7     |                 | Enrichment Score: 3.06                                                                              | <b>G</b> |  |       |         |           |
| <input type="checkbox"/> | GOTERM_BP_ALL   | <a href="#">apoptosis</a>                                                                           | RT       |  | 92    | 2.1E-5  | 7.7E-3    |
| <input type="checkbox"/> | GOTERM_BP_ALL   | <a href="#">cell death</a>                                                                          | RT       |  | 95    | 3.5E-5  | 9.1E-3    |
| <input type="checkbox"/> | GOTERM_BP_ALL   | <a href="#">death</a>                                                                               | RT       |  | 95    | 3.5E-5  | 9.1E-3    |
| <input type="checkbox"/> | GOTERM_BP_ALL   | <a href="#">programmed cell death</a>                                                               | RT       |  | 92    | 4.1E-5  | 9.5E-3    |
| <input type="checkbox"/> | GOTERM_BP_ALL   | <a href="#">regulation of apoptosis</a>                                                             | RT       |  | 66    | 5.8E-5  | 1.2E-2    |
| <input type="checkbox"/> | GOTERM_BP_ALL   | <a href="#">regulation of programmed cell death</a>                                                 | RT       |  | 66    | 9.0E-5  | 1.7E-2    |
| <input type="checkbox"/> | SP_PIR_KEYWORDS | <a href="#">apoptosis</a>                                                                           | RT       |  | 37    | 2.7E-3  | 1.7E-1    |
| <input type="checkbox"/> | GOTERM_BP_ALL   | <a href="#">cell development</a>                                                                    | RT       |  | 134   | 3.4E-3  | 2.7E-1    |
| <input type="checkbox"/> | GOTERM_BP_ALL   | <a href="#">negative regulation of apoptosis</a>                                                    | RT       |  | 29    | 5.8E-3  | 3.5E-1    |
| <input type="checkbox"/> | GOTERM_BP_ALL   | <a href="#">negative regulation of programmed cell death</a>                                        | RT       |  | 29    | 7.6E-3  | 3.9E-1    |
| <input type="checkbox"/> | GOTERM_BP_ALL   | <a href="#">cellular developmental process</a>                                                      | RT       |  | 186   | 1.1E-2  | 4.6E-1    |
| <input type="checkbox"/> | GOTERM_BP_ALL   | <a href="#">cell differentiation</a>                                                                | RT       |  | 186   | 1.1E-2  | 4.6E-1    |
| <input type="checkbox"/> | GOTERM_BP_ALL   | <a href="#">anti-apoptosis</a>                                                                      | RT       |  | 17    | 1.8E-2  | 5.4E-1    |
| <input type="checkbox"/> | GOTERM_BP_ALL   | <a href="#">developmental process</a>                                                               | RT       |  | 282   | 3.3E-2  | 6.8E-1    |
| Annotation Cluster 8     |                 | Enrichment Score: 2.96                                                                              | <b>G</b> |  |       |         |           |

| <input type="checkbox"/> | GO TERM                                                                                             | RT | Count                  | P_Value  | Benjamini |
|--------------------------|-----------------------------------------------------------------------------------------------------|----|------------------------|----------|-----------|
| <input type="checkbox"/> | GOTERM_BP_ALL <a href="#">taxis</a>                                                                 | RT | 25                     | 2.7E-5   | 8.7E-3    |
| <input type="checkbox"/> | GOTERM_BP_ALL <a href="#">chemotaxis</a>                                                            | RT | 25                     | 2.7E-5   | 8.7E-3    |
| <input type="checkbox"/> | GOTERM_BP_ALL <a href="#">response to chemical stimulus</a>                                         | RT | 53                     | 2.4E-3   | 2.3E-1    |
| <input type="checkbox"/> | GOTERM_BP_ALL <a href="#">locomotory behavior</a>                                                   | RT | 31                     | 3.8E-3   | 2.9E-1    |
| <input type="checkbox"/> | GOTERM_BP_ALL <a href="#">response to external stimulus</a>                                         | RT | 60                     | 5.6E-3   | 3.5E-1    |
| <input type="checkbox"/> | GOTERM_BP_ALL <a href="#">behavior</a>                                                              | RT | 38                     | 4.5E-2   | 7.4E-1    |
| Annotation Cluster 9     |                                                                                                     |    | Enrichment Score: 2.95 | <b>G</b> |           |
| <input type="checkbox"/> | GOTERM_BP_ALL <a href="#">protein modification process</a>                                          | RT | 188                    | 2.6E-6   | 1.5E-3    |
| <input type="checkbox"/> | GOTERM_BP_ALL <a href="#">biopolymer modification</a>                                               | RT | 192                    | 6.4E-6   | 3.0E-3    |
| <input type="checkbox"/> | GOTERM_BP_ALL <a href="#">post-translational protein modification</a>                               | RT | 160                    | 5.5E-5   | 1.2E-2    |
| <input type="checkbox"/> | GOTERM_BP_ALL <a href="#">cellular metabolic process</a>                                            | RT | 638                    | 5.8E-4   | 7.6E-2    |
| <input type="checkbox"/> | GOTERM_BP_ALL <a href="#">primary metabolic process</a>                                             | RT | 627                    | 6.1E-3   | 3.6E-1    |
| <input type="checkbox"/> | GOTERM_BP_ALL <a href="#">macromolecule metabolic process</a>                                       | RT | 549                    | 9.9E-3   | 4.4E-1    |
| <input type="checkbox"/> | GOTERM_BP_ALL <a href="#">cellular macromolecule metabolic process</a>                              | RT | 284                    | 3.3E-2   | 6.8E-1    |
| <input type="checkbox"/> | GOTERM_BP_ALL <a href="#">cellular protein metabolic process</a>                                    | RT | 279                    | 4.0E-2   | 7.1E-1    |
| <input type="checkbox"/> | GOTERM_BP_ALL <a href="#">protein metabolic process</a>                                             | RT | 288                    | 6.5E-2   | 8.2E-1    |
| Annotation Cluster 10    |                                                                                                     |    | Enrichment Score: 2.66 | <b>G</b> |           |
| <input type="checkbox"/> | GOTERM_BP_ALL <a href="#">signal transduction</a>                                                   | RT | 276                    | 4.5E-5   | 1.0E-2    |
| <input type="checkbox"/> | GOTERM_BP_ALL <a href="#">cell communication</a>                                                    | RT | 291                    | 4.8E-4   | 6.4E-2    |
| <input type="checkbox"/> | GOTERM_BP_ALL <a href="#">intracellular signaling cascade</a>                                       | RT | 127                    | 8.3E-3   | 3.9E-1    |
| <input type="checkbox"/> | GOTERM_BP_ALL <a href="#">cell surface receptor linked signal transduction</a>                      | RT | 128                    | 1.2E-1   | 9.1E-1    |
| Annotation Cluster 11    |                                                                                                     |    | Enrichment Score: 2.61 | <b>G</b> |           |
| <input type="checkbox"/> | GOTERM_BP_ALL <a href="#">regulation of apoptosis</a>                                               | RT | 66                     | 5.8E-5   | 1.2E-2    |
| <input type="checkbox"/> | GOTERM_BP_ALL <a href="#">regulation of programmed cell death</a>                                   | RT | 66                     | 9.0E-5   | 1.7E-2    |
| <input type="checkbox"/> | GOTERM_BP_ALL <a href="#">induction of programmed cell death</a>                                    | RT | 24                     | 1.4E-2   | 4.9E-1    |
| <input type="checkbox"/> | GOTERM_BP_ALL <a href="#">induction of apoptosis</a>                                                | RT | 24                     | 1.4E-2   | 4.9E-1    |
| <input type="checkbox"/> | GOTERM_BP_ALL <a href="#">positive regulation of apoptosis</a>                                      | RT | 29                     | 1.4E-2   | 5.0E-1    |
| <input type="checkbox"/> | GOTERM_BP_ALL <a href="#">positive regulation of programmed cell death</a>                          | RT | 29                     | 1.7E-2   | 5.4E-1    |
| Annotation Cluster 12    |                                                                                                     |    | Enrichment Score: 2.27 | <b>G</b> |           |
| <input type="checkbox"/> | GOTERM_BP_ALL <a href="#">biopolymer metabolic process</a>                                          | RT | 452                    | 9.2E-6   | 4.0E-3    |
| <input type="checkbox"/> | GOTERM_BP_ALL <a href="#">cellular process</a>                                                      | RT | 945                    | 1.0E-4   | 1.8E-2    |
| <input type="checkbox"/> | GOTERM_CC_ALL <a href="#">intracellular</a>                                                         | RT | 805                    | 2.6E-4   | 9.5E-2    |
| <input type="checkbox"/> | GOTERM_BP_ALL <a href="#">cellular metabolic process</a>                                            | RT | 638                    | 5.8E-4   | 7.6E-2    |
| <input type="checkbox"/> | GOTERM_CC_ALL <a href="#">cell part</a>                                                             | RT | 1060                   | 3.0E-3   | 3.7E-1    |
| <input type="checkbox"/> | GOTERM_CC_ALL <a href="#">cell</a>                                                                  | RT | 1060                   | 3.0E-3   | 3.7E-1    |
| <input type="checkbox"/> | GOTERM_BP_ALL <a href="#">primary metabolic process</a>                                             | RT | 627                    | 6.1E-3   | 3.6E-1    |
| <input type="checkbox"/> | GOTERM_BP_ALL <a href="#">metabolic process</a>                                                     | RT | 690                    | 6.3E-3   | 3.6E-1    |
| <input type="checkbox"/> | GOTERM_CC_ALL <a href="#">intracellular part</a>                                                    | RT | 751                    | 8.5E-3   | 4.8E-1    |
| <input type="checkbox"/> | GOTERM_BP_ALL <a href="#">macromolecule metabolic process</a>                                       | RT | 549                    | 9.9E-3   | 4.4E-1    |
| <input type="checkbox"/> | GOTERM_CC_ALL <a href="#">nucleus</a>                                                               | RT | 368                    | 1.9E-2   | 6.8E-1    |
| <input type="checkbox"/> | GOTERM_CC_ALL <a href="#">intracellular membrane-bound organelle</a>                                | RT | 565                    | 1.9E-2   | 6.6E-1    |
| <input type="checkbox"/> | GOTERM_CC_ALL <a href="#">cytoplasm</a>                                                             | RT | 494                    | 2.0E-2   | 6.5E-1    |
| <input type="checkbox"/> | GOTERM_CC_ALL <a href="#">membrane-bound organelle</a>                                              | RT | 565                    | 2.1E-2   | 6.3E-1    |
| <input type="checkbox"/> | GOTERM_BP_ALL <a href="#">nucleobase, nucleoside, nucleotide and nucleic acid metabolic process</a> | RT | 312                    | 2.9E-2   | 6.4E-1    |
| <input type="checkbox"/> | GOTERM_CC_ALL <a href="#">intracellular organelle</a>                                               | RT | 604                    | 3.5E-1   | 1.0E0     |
| <input type="checkbox"/> | GOTERM_CC_ALL <a href="#">organelle</a>                                                             | RT | 604                    | 3.8E-1   | 1.0E0     |
| Annotation Cluster 13    |                                                                                                     |    | Enrichment Score: 2.15 | <b>G</b> |           |
| <input type="checkbox"/> | GOTERM_BP_ALL <a href="#">positive regulation of cellular process</a>                               | RT | 109                    | 4.3E-4   | 6.0E-2    |
| <input type="checkbox"/> | GOTERM_BP_ALL <a href="#">regulation of transcription from RNA</a>                                  | RT | 56                     | 1.5E-2   | 1.7E-1    |

|                          |                 |                                                                                                              |                    |  | Count | P_Value | Benjamini |
|--------------------------|-----------------|--------------------------------------------------------------------------------------------------------------|--------------------|--|-------|---------|-----------|
| <input type="checkbox"/> |                 | <a href="#">polymerase II promoter</a>                                                                       | <a href="#">RT</a> |  | 50    | 1.5E-3  | 1.7E-1    |
| <input type="checkbox"/> | GOTERM_BP_ALL   | <a href="#">transcription from RNA polymerase II promoter</a>                                                | <a href="#">RT</a> |  | 61    | 1.7E-3  | 1.9E-1    |
| <input type="checkbox"/> | GOTERM_BP_ALL   | <a href="#">positive regulation of cellular metabolic process</a>                                            | <a href="#">RT</a> |  | 56    | 3.5E-3  | 2.7E-1    |
| <input type="checkbox"/> | GOTERM_BP_ALL   | <a href="#">positive regulation of biological process</a>                                                    | <a href="#">RT</a> |  | 112   | 1.0E-2  | 4.5E-1    |
| <input type="checkbox"/> | GOTERM_BP_ALL   | <a href="#">positive regulation of transcription</a>                                                         | <a href="#">RT</a> |  | 44    | 1.2E-2  | 4.7E-1    |
| <input type="checkbox"/> | GOTERM_BP_ALL   | <a href="#">positive regulation of metabolic process</a>                                                     | <a href="#">RT</a> |  | 56    | 1.2E-2  | 4.7E-1    |
| <input type="checkbox"/> | GOTERM_BP_ALL   | <a href="#">positive regulation of nucleobase, nucleoside, nucleotide and nucleic acid metabolic process</a> | <a href="#">RT</a> |  | 44    | 1.6E-2  | 5.3E-1    |
| <input type="checkbox"/> | GOTERM_BP_ALL   | <a href="#">positive regulation of transcription, DNA-dependent</a>                                          | <a href="#">RT</a> |  | 36    | 2.9E-2  | 6.4E-1    |
| <input type="checkbox"/> | GOTERM_BP_ALL   | <a href="#">positive regulation of transcription from RNA polymerase II promoter</a>                         | <a href="#">RT</a> |  | 26    | 1.3E-1  | 9.1E-1    |
| Annotation Cluster 14    |                 | Enrichment Score: 2.07                                                                                       | <b>G</b>           |  | Count | P_Value | Benjamini |
| <input type="checkbox"/> | UP_SEQ_FEATURE  | region of interest:Modulating                                                                                | <a href="#">RT</a> |  | 7     | 7.5E-4  | 1.0E0     |
| <input type="checkbox"/> | UP_SEQ_FEATURE  | region of interest:Hinge                                                                                     | <a href="#">RT</a> |  | 8     | 1.1E-3  | 1.0E0     |
| <input type="checkbox"/> | GOTERM_MF_ALL   | <a href="#">ligand-dependent nuclear receptor activity</a>                                                   | <a href="#">RT</a> |  | 15    | 1.2E-3  | 3.0E-1    |
| <input type="checkbox"/> | INTERPRO        | <a href="#">Steroid hormone receptor</a>                                                                     | <a href="#">RT</a> |  | 12    | 1.7E-3  | 9.9E-1    |
| <input type="checkbox"/> | INTERPRO        | <a href="#">Nuclear hormone receptor, ligand-binding, core</a>                                               | <a href="#">RT</a> |  | 12    | 1.7E-3  | 9.9E-1    |
| <input type="checkbox"/> | INTERPRO        | <a href="#">Nuclear hormone receptor, ligand-binding</a>                                                     | <a href="#">RT</a> |  | 12    | 2.1E-3  | 9.5E-1    |
| <input type="checkbox"/> | INTERPRO        | <a href="#">Zinc finger, nuclear hormone receptor-type</a>                                                   | <a href="#">RT</a> |  | 11    | 3.5E-3  | 8.9E-1    |
| <input type="checkbox"/> | SMART           | <a href="#">HOLI</a>                                                                                         | <a href="#">RT</a> |  | 12    | 3.8E-3  | 6.8E-1    |
| <input type="checkbox"/> | INTERPRO        | <a href="#">Zinc finger, NHR/GATA-type</a>                                                                   | <a href="#">RT</a> |  | 10    | 4.9E-3  | 9.4E-1    |
| <input type="checkbox"/> | UP_SEQ_FEATURE  | region of interest:Steroid-binding                                                                           | <a href="#">RT</a> |  | 4     | 6.0E-3  | 1.0E0     |
| <input type="checkbox"/> | SMART           | <a href="#">ZnF_C4</a>                                                                                       | <a href="#">RT</a> |  | 11    | 7.0E-3  | 5.7E-1    |
| <input type="checkbox"/> | GOTERM_MF_ALL   | <a href="#">steroid hormone receptor activity</a>                                                            | <a href="#">RT</a> |  | 13    | 7.4E-3  | 7.3E-1    |
| <input type="checkbox"/> | UP_SEQ_FEATURE  | DNA-binding region:Nuclear receptor                                                                          | <a href="#">RT</a> |  | 9     | 1.6E-2  | 1.0E0     |
| <input type="checkbox"/> | UP_SEQ_FEATURE  | zinc finger region:NR C4-type                                                                                | <a href="#">RT</a> |  | 9     | 1.6E-2  | 1.0E0     |
| <input type="checkbox"/> | GOTERM_MF_ALL   | <a href="#">steroid binding</a>                                                                              | <a href="#">RT</a> |  | 10    | 5.7E-2  | 9.6E-1    |
| <input type="checkbox"/> | SP_PIR_KEYWORDS | <a href="#">Steroid-binding</a>                                                                              | <a href="#">RT</a> |  | 4     | 1.5E-1  | 8.8E-1    |
| <input type="checkbox"/> | UP_SEQ_FEATURE  | region of interest:Ligand-binding                                                                            | <a href="#">RT</a> |  | 4     | 3.8E-1  | 1.0E0     |
| <input type="checkbox"/> | SP_PIR_KEYWORDS | <a href="#">Lipid-binding</a>                                                                                | <a href="#">RT</a> |  | 8     | 5.6E-1  | 1.0E0     |
| Annotation Cluster 15    |                 | Enrichment Score: 2                                                                                          | <b>G</b>           |  | Count | P_Value | Benjamini |
| <input type="checkbox"/> | GOTERM_BP_ALL   | <a href="#">immune system development</a>                                                                    | <a href="#">RT</a> |  | 41    | 1.7E-3  | 1.8E-1    |
| <input type="checkbox"/> | GOTERM_BP_ALL   | <a href="#">hemopoietic or lymphoid organ development</a>                                                    | <a href="#">RT</a> |  | 39    | 1.8E-3  | 1.8E-1    |
| <input type="checkbox"/> | GOTERM_BP_ALL   | <a href="#">myeloid cell differentiation</a>                                                                 | <a href="#">RT</a> |  | 19    | 7.8E-3  | 3.9E-1    |
| <input type="checkbox"/> | GOTERM_BP_ALL   | <a href="#">hemopoiesis</a>                                                                                  | <a href="#">RT</a> |  | 33    | 1.2E-2  | 4.6E-1    |
| <input type="checkbox"/> | GOTERM_BP_ALL   | <a href="#">leukocyte differentiation</a>                                                                    | <a href="#">RT</a> |  | 16    | 3.4E-1  | 9.8E-1    |
| Annotation Cluster 16    |                 | Enrichment Score: 1.97                                                                                       | <b>G</b>           |  | Count | P_Value | Benjamini |
| <input type="checkbox"/> | SP_PIR_KEYWORDS | <a href="#">receptor</a>                                                                                     | <a href="#">RT</a> |  | 128   | 4.8E-3  | 2.2E-1    |
| <input type="checkbox"/> | GOTERM_MF_ALL   | <a href="#">receptor activity</a>                                                                            | <a href="#">RT</a> |  | 154   | 9.2E-3  | 7.9E-1    |
| <input type="checkbox"/> | GOTERM_MF_ALL   | <a href="#">signal transducer activity</a>                                                                   | <a href="#">RT</a> |  | 175   | 1.7E-2  | 8.3E-1    |
| <input type="checkbox"/> | GOTERM_MF_ALL   | <a href="#">molecular transducer activity</a>                                                                | <a href="#">RT</a> |  | 175   | 1.7E-2  | 8.3E-1    |
| Annotation Cluster 17    |                 | Enrichment Score: 1.96                                                                                       | <b>G</b>           |  | Count | P_Value | Benjamini |
| <input type="checkbox"/> | PIR_SUPERFAMILY | PIRSF002050:histone H2B                                                                                      | <a href="#">RT</a> |  | 6     | 2.8E-5  | 8.4E-2    |
| <input type="checkbox"/> | INTERPRO        | <a href="#">Histone H2B</a>                                                                                  | <a href="#">RT</a> |  | 6     | 2.1E-4  | 7.0E-1    |
| <input type="checkbox"/> | SMART           | <a href="#">H2B</a>                                                                                          | <a href="#">RT</a> |  | 6     | 3.3E-4  | 1.8E-1    |
| <input type="checkbox"/> | GOTERM_BP_ALL   | <a href="#">chromatin assembly or disassembly</a>                                                            | <a href="#">RT</a> |  | 20    | 1.3E-3  | 1.6E-1    |
| <input type="checkbox"/> | GOTERM_CC_ALL   | <a href="#">chromatin</a>                                                                                    | <a href="#">RT</a> |  | 25    | 4.7E-3  | 4.0E-1    |
| <input type="checkbox"/> | GOTERM_CC_ALL   | <a href="#">nucleosome</a>                                                                                   | <a href="#">RT</a> |  | 11    | 4.8E-3  | 3.7E-1    |

|                          |                 |                                                                                          |                    |  |       |         |           |
|--------------------------|-----------------|------------------------------------------------------------------------------------------|--------------------|--|-------|---------|-----------|
| <input type="checkbox"/> | SP_PIR_KEYWORDS | <a href="#">Chromosomal protein</a>                                                      | <a href="#">RT</a> |  | 18    | 6.8E-3  | 2.6E-1    |
| <input type="checkbox"/> | GOTERM_BP_ALL   | <a href="#">chromatin assembly</a>                                                       | <a href="#">RT</a> |  | 14    | 7.1E-3  | 3.8E-1    |
| <input type="checkbox"/> | GOTERM_BP_ALL   | <a href="#">nucleosome assembly</a>                                                      | <a href="#">RT</a> |  | 12    | 8.5E-3  | 4.0E-1    |
| <input type="checkbox"/> | INTERPRO        | <a href="#">Histone core</a>                                                             | <a href="#">RT</a> |  | 7     | 1.7E-2  | 9.9E-1    |
| <input type="checkbox"/> | SP_PIR_KEYWORDS | <a href="#">Nucleosome core</a>                                                          | <a href="#">RT</a> |  | 8     | 1.8E-2  | 4.4E-1    |
| <input type="checkbox"/> | GOTERM_CC_ALL   | <a href="#">chromosomal part</a>                                                         | <a href="#">RT</a> |  | 35    | 2.1E-2  | 6.4E-1    |
| <input type="checkbox"/> | GOTERM_CC_ALL   | <a href="#">chromosome</a>                                                               | <a href="#">RT</a> |  | 39    | 2.2E-2  | 6.2E-1    |
| <input type="checkbox"/> | GOTERM_BP_ALL   | <a href="#">protein-DNA complex assembly</a>                                             | <a href="#">RT</a> |  | 13    | 9.6E-2  | 8.8E-1    |
| <input type="checkbox"/> | INTERPRO        | <a href="#">Histone-fold</a>                                                             | <a href="#">RT</a> |  | 6     | 2.4E-1  | 1.0E0     |
| <input type="checkbox"/> | SP_PIR_KEYWORDS | <a href="#">Methylation</a>                                                              | <a href="#">RT</a> |  | 17    | 3.0E-1  | 9.7E-1    |
| <input type="checkbox"/> | GOTERM_BP_ALL   | <a href="#">cellular component assembly</a>                                              | <a href="#">RT</a> |  | 38    | 4.0E-1  | 9.9E-1    |
| <input type="checkbox"/> | GOTERM_BP_ALL   | <a href="#">macromolecular complex assembly</a>                                          | <a href="#">RT</a> |  | 31    | 5.3E-1  | 1.0E0     |
| Annotation Cluster 18    |                 | Enrichment Score: 1.91                                                                   | <b>G</b>           |  | Count | P_Value | Benjamini |
| <input type="checkbox"/> | INTERPRO        | <a href="#">Zinc finger, ZZ-type</a>                                                     | <a href="#">RT</a> |  | 6     | 6.7E-3  | 9.6E-1    |
| <input type="checkbox"/> | SMART           | <a href="#">ZnF_ZZ</a>                                                                   | <a href="#">RT</a> |  | 6     | 1.0E-2  | 5.9E-1    |
| <input type="checkbox"/> | UP_SEQ_FEATURE  | zinc finger region:ZZ-type                                                               | <a href="#">RT</a> |  | 4     | 2.7E-2  | 1.0E0     |
| Annotation Cluster 19    |                 | Enrichment Score: 1.77                                                                   | <b>G</b>           |  | Count | P_Value | Benjamini |
| <input type="checkbox"/> | GOTERM_MF_ALL   | <a href="#">transcription cofactor activity</a>                                          | <a href="#">RT</a> |  | 25    | 4.1E-3  | 5.7E-1    |
| <input type="checkbox"/> | GOTERM_MF_ALL   | <a href="#">transcription factor binding</a>                                             | <a href="#">RT</a> |  | 33    | 1.1E-2  | 7.4E-1    |
| <input type="checkbox"/> | GOTERM_MF_ALL   | <a href="#">transcription activator activity</a>                                         | <a href="#">RT</a> |  | 28    | 3.6E-2  | 9.2E-1    |
| <input type="checkbox"/> | GOTERM_MF_ALL   | <a href="#">transcription coactivator activity</a>                                       | <a href="#">RT</a> |  | 13    | 5.3E-2  | 9.6E-1    |
| Annotation Cluster 20    |                 | Enrichment Score: 1.77                                                                   | <b>G</b>           |  | Count | P_Value | Benjamini |
| <input type="checkbox"/> | INTERPRO        | <a href="#">Pleckstrin homology-type</a>                                                 | <a href="#">RT</a> |  | 35    | 2.3E-3  | 9.3E-1    |
| <input type="checkbox"/> | INTERPRO        | <a href="#">Pleckstrin-like</a>                                                          | <a href="#">RT</a> |  | 28    | 2.6E-2  | 1.0E0     |
| <input type="checkbox"/> | SMART           | <a href="#">PH</a>                                                                       | <a href="#">RT</a> |  | 29    | 8.2E-2  | 8.5E-1    |
| Annotation Cluster 21    |                 | Enrichment Score: 1.66                                                                   | <b>G</b>           |  | Count | P_Value | Benjamini |
| <input type="checkbox"/> | GOTERM_BP_ALL   | <a href="#">transmembrane receptor protein serine/threonine kinase signaling pathway</a> | <a href="#">RT</a> |  | 16    | 7.8E-3  | 3.9E-1    |
| <input type="checkbox"/> | GOTERM_BP_ALL   | <a href="#">transforming growth factor beta receptor signaling pathway</a>               | <a href="#">RT</a> |  | 10    | 2.9E-2  | 6.4E-1    |
| <input type="checkbox"/> | KEGG_PATHWAY    | <a href="#">TGF-beta signaling pathway</a>                                               | <a href="#">RT</a> |  | 14    | 4.5E-2  | 5.3E-1    |
| Annotation Cluster 22    |                 | Enrichment Score: 1.62                                                                   | <b>G</b>           |  | Count | P_Value | Benjamini |
| <input type="checkbox"/> | SMART           | <a href="#">ZnF_A20</a>                                                                  | <a href="#">RT</a> |  | 4     | 1.4E-2  | 5.7E-1    |
| <input type="checkbox"/> | INTERPRO        | <a href="#">Zinc finger, AN1-type</a>                                                    | <a href="#">RT</a> |  | 4     | 1.7E-2  | 9.9E-1    |
| <input type="checkbox"/> | SMART           | <a href="#">ZnF_AN1</a>                                                                  | <a href="#">RT</a> |  | 4     | 2.2E-2  | 7.1E-1    |
| <input type="checkbox"/> | INTERPRO        | <a href="#">Zinc finger, A20-type</a>                                                    | <a href="#">RT</a> |  | 3     | 6.2E-2  | 1.0E0     |
| Annotation Cluster 23    |                 | Enrichment Score: 1.62                                                                   | <b>G</b>           |  | Count | P_Value | Benjamini |
| <input type="checkbox"/> | INTERPRO        | <a href="#">KRAB box</a>                                                                 | <a href="#">RT</a> |  | 31    | 2.5E-3  | 9.1E-1    |
| <input type="checkbox"/> | SMART           | <a href="#">KRAB</a>                                                                     | <a href="#">RT</a> |  | 32    | 9.7E-3  | 6.3E-1    |
| <input type="checkbox"/> | INTERPRO        | <a href="#">Zinc finger, C2H2-subtype</a>                                                | <a href="#">RT</a> |  | 27    | 1.5E-2  | 9.9E-1    |
| <input type="checkbox"/> | INTERPRO        | <a href="#">Zinc finger, C2H2-type</a>                                                   | <a href="#">RT</a> |  | 54    | 2.9E-2  | 1.0E0     |
| <input type="checkbox"/> | INTERPRO        | <a href="#">Zinc finger, C2H2-type/integrase, DNA-binding</a>                            | <a href="#">RT</a> |  | 35    | 4.7E-2  | 1.0E0     |
| <input type="checkbox"/> | INTERPRO        | <a href="#">Zinc finger, C2H2-like</a>                                                   | <a href="#">RT</a> |  | 40    | 9.0E-2  | 1.0E0     |
| <input type="checkbox"/> | SMART           | <a href="#">ZnF_C2H2</a>                                                                 | <a href="#">RT</a> |  | 46    | 1.1E-1  | 8.5E-1    |
| Annotation Cluster 24    |                 | Enrichment Score: 1.56                                                                   | <b>G</b>           |  | Count | P_Value | Benjamini |
| <input type="checkbox"/> | GOTERM_BP_ALL   | <a href="#">leukocyte chemotaxis</a>                                                     | <a href="#">RT</a> |  | 8     | 3.2E-3  | 2.7E-1    |
| <input type="checkbox"/> | GOTERM_BP_ALL   | <a href="#">leukocyte migration</a>                                                      | <a href="#">RT</a> |  | 9     | 1.0E-2  | 4.4E-1    |
| <input type="checkbox"/> | GOTERM_BP_ALL   | <a href="#">regulation of chemotaxis</a>                                                 | <a href="#">RT</a> |  | 5     | 1.1E-2  | 4.6E-1    |
| <input type="checkbox"/> | GOTERM_BP_ALL   | <a href="#">positive regulation of chemotaxis</a>                                        | <a href="#">RT</a> |  | 5     | 1.1E-2  | 4.6E-1    |
| <input type="checkbox"/> | GOTERM_BP_ALL   | <a href="#">regulation of positive chemotaxis</a>                                        | <a href="#">RT</a> |  | 4     | 4.8E-2  | 7.6E-1    |
| <input type="checkbox"/> | GOTERM_BP_ALL   | <a href="#">positive regulation of positive chemotaxis</a>                               | <a href="#">RT</a> |  | 4     | 4.8E-2  | 7.6E-1    |

|                          |                 |                                                                                 |    |  | Count | P_Value | Benjamini |
|--------------------------|-----------------|---------------------------------------------------------------------------------|----|--|-------|---------|-----------|
| <input type="checkbox"/> | GOTERM_BP_ALL   | <a href="#">induction of positive chemotaxis</a>                                | RT |  | 4     | 4.8E-2  | 7.6E-1    |
| <input type="checkbox"/> | GOTERM_BP_ALL   | <a href="#">positive chemotaxis</a>                                             | RT |  | 4     | 6.2E-2  | 8.1E-1    |
| <input type="checkbox"/> | GOTERM_BP_ALL   | <a href="#">neutrophil chemotaxis</a>                                           | RT |  | 3     | 3.4E-1  | 9.8E-1    |
| Annotation Cluster 25    |                 | Enrichment Score: 1.53                                                          | G  |  | Count | P_Value | Benjamini |
| <input type="checkbox"/> | GOTERM_BP_ALL   | <a href="#">regulation of cell differentiation</a>                              | RT |  | 29    | 3.2E-3  | 2.7E-1    |
| <input type="checkbox"/> | GOTERM_BP_ALL   | <a href="#">regulation of myeloid cell differentiation</a>                      | RT |  | 11    | 5.9E-3  | 3.5E-1    |
| <input type="checkbox"/> | GOTERM_BP_ALL   | <a href="#">myeloid cell differentiation</a>                                    | RT |  | 19    | 7.8E-3  | 3.9E-1    |
| <input type="checkbox"/> | GOTERM_BP_ALL   | <a href="#">negative regulation of myeloid cell differentiation</a>             | RT |  | 6     | 3.0E-2  | 6.5E-1    |
| <input type="checkbox"/> | GOTERM_BP_ALL   | <a href="#">regulation of developmental process</a>                             | RT |  | 34    | 1.1E-1  | 8.9E-1    |
| <input type="checkbox"/> | GOTERM_BP_ALL   | <a href="#">negative regulation of cell differentiation</a>                     | RT |  | 13    | 1.3E-1  | 9.2E-1    |
| <input type="checkbox"/> | GOTERM_BP_ALL   | <a href="#">negative regulation of developmental process</a>                    | RT |  | 13    | 3.1E-1  | 9.8E-1    |
| Annotation Cluster 26    |                 | Enrichment Score: 1.53                                                          | G  |  | Count | P_Value | Benjamini |
| <input type="checkbox"/> | GOTERM_BP_ALL   | <a href="#">protein modification process</a>                                    | RT |  | 188   | 2.6E-6  | 1.5E-3    |
| <input type="checkbox"/> | GOTERM_BP_ALL   | <a href="#">biopolymer modification</a>                                         | RT |  | 192   | 6.4E-6  | 3.0E-3    |
| <input type="checkbox"/> | GOTERM_BP_ALL   | <a href="#">post-translational protein modification</a>                         | RT |  | 160   | 5.5E-5  | 1.2E-2    |
| <input type="checkbox"/> | SP_PIR_KEYWORDS | <a href="#">transferase</a>                                                     | RT |  | 147   | 1.4E-4  | 1.8E-2    |
| <input type="checkbox"/> | GOTERM_MF_ALL   | <a href="#">transferase activity</a>                                            | RT |  | 194   | 2.9E-4  | 1.4E-1    |
| <input type="checkbox"/> | GOTERM_MF_ALL   | <a href="#">kinase activity</a>                                                 | RT |  | 100   | 2.9E-3  | 5.1E-1    |
| <input type="checkbox"/> | GOTERM_BP_ALL   | <a href="#">protein amino acid phosphorylation</a>                              | RT |  | 74    | 5.2E-3  | 3.4E-1    |
| <input type="checkbox"/> | GOTERM_MF_ALL   | <a href="#">transferase activity, transferring phosphorus-containing groups</a> | RT |  | 111   | 5.5E-3  | 6.5E-1    |
| <input type="checkbox"/> | SP_PIR_KEYWORDS | <a href="#">kinase</a>                                                          | RT |  | 80    | 7.0E-3  | 2.5E-1    |
| <input type="checkbox"/> | GOTERM_MF_ALL   | <a href="#">phosphotransferase activity, alcohol group as acceptor</a>          | RT |  | 79    | 9.6E-3  | 7.8E-1    |
| <input type="checkbox"/> | GOTERM_BP_ALL   | <a href="#">phosphorylation</a>                                                 | RT |  | 80    | 1.5E-2  | 5.0E-1    |
| <input type="checkbox"/> | GOTERM_MF_ALL   | <a href="#">protein serine/threonine kinase activity</a>                        | RT |  | 56    | 1.7E-2  | 8.1E-1    |
| <input type="checkbox"/> | GOTERM_MF_ALL   | <a href="#">protein kinase activity</a>                                         | RT |  | 66    | 2.6E-2  | 8.9E-1    |
| <input type="checkbox"/> | GOTERM_BP_ALL   | <a href="#">phosphorus metabolic process</a>                                    | RT |  | 91    | 2.8E-2  | 6.4E-1    |
| <input type="checkbox"/> | GOTERM_BP_ALL   | <a href="#">phosphate metabolic process</a>                                     | RT |  | 91    | 2.8E-2  | 6.4E-1    |
| <input type="checkbox"/> | UP_SEQ_FEATURE  | active site:Proton acceptor                                                     | RT |  | 54    | 4.5E-2  | 1.0E0     |
| <input type="checkbox"/> | INTERPRO        | <a href="#">Protein kinase, core</a>                                            | RT |  | 40    | 4.9E-2  | 1.0E0     |
| <input type="checkbox"/> | INTERPRO        | <a href="#">Serine/threonine protein kinase, active site</a>                    | RT |  | 30    | 7.4E-2  | 1.0E0     |
| <input type="checkbox"/> | SP_PIR_KEYWORDS | <a href="#">Serine/threonine-protein kinase</a>                                 | RT |  | 39    | 7.6E-2  | 7.6E-1    |
| <input type="checkbox"/> | GOTERM_MF_ALL   | <a href="#">protein-tyrosine kinase activity</a>                                | RT |  | 35    | 1.1E-1  | 9.9E-1    |
| <input type="checkbox"/> | UP_SEQ_FEATURE  | domain:Protein kinase                                                           | RT |  | 38    | 1.1E-1  | 1.0E0     |
| <input type="checkbox"/> | INTERPRO        | <a href="#">Serine/threonine protein kinase</a>                                 | RT |  | 23    | 1.8E-1  | 1.0E0     |
| <input type="checkbox"/> | UP_SEQ_FEATURE  | binding site:ATP                                                                | RT |  | 39    | 1.9E-1  | 1.0E0     |
| <input type="checkbox"/> | SMART           | <a href="#">S TKc</a>                                                           | RT |  | 39    | 2.5E-1  | 9.4E-1    |
| <input type="checkbox"/> | UP_SEQ_FEATURE  | nucleotide phosphate-binding region:ATP                                         | RT |  | 54    | 5.1E-1  | 1.0E0     |
| <input type="checkbox"/> | GOTERM_MF_ALL   | <a href="#">adenyl nucleotide binding</a>                                       | RT |  | 118   | 7.0E-1  | 1.0E0     |
| <input type="checkbox"/> | GOTERM_MF_ALL   | <a href="#">adenyl ribonucleotide binding</a>                                   | RT |  | 111   | 7.5E-1  | 1.0E0     |
| <input type="checkbox"/> | SP_PIR_KEYWORDS | <a href="#">atp-binding</a>                                                     | RT |  | 83    | 7.5E-1  | 1.0E0     |
| <input type="checkbox"/> | GOTERM_MF_ALL   | <a href="#">ATP binding</a>                                                     | RT |  | 109   | 7.7E-1  | 1.0E0     |
| <input type="checkbox"/> | GOTERM_MF_ALL   | <a href="#">purine nucleotide binding</a>                                       | RT |  | 141   | 7.8E-1  | 1.0E0     |
| <input type="checkbox"/> | GOTERM_MF_ALL   | <a href="#">nucleotide binding</a>                                              | RT |  | 161   | 7.9E-1  | 1.0E0     |
| <input type="checkbox"/> | GOTERM_MF_ALL   | <a href="#">ribonucleotide binding</a>                                          | RT |  | 134   | 8.2E-1  | 1.0E0     |
| <input type="checkbox"/> | GOTERM_MF_ALL   | <a href="#">purine ribonucleotide binding</a>                                   | RT |  | 134   | 8.2E-1  | 1.0E0     |
| <input type="checkbox"/> | SP_PIR_KEYWORDS | <a href="#">nucleotide-binding</a>                                              | RT |  | 102   | 8.8E-1  | 1.0E0     |
| Annotation Cluster 27    |                 | Enrichment Score: 1.45                                                          | G  |  | Count | P_Value | Benjamini |
| <input type="checkbox"/> | GOTERM_BP_ALL   | <a href="#">regulation of Ras protein signal</a>                                | RT |  | 24    | 2.1E-2  | 2.1E-1    |

|                          |                       |                                                                         |                    |  | Count | P_Value | Benjamini |
|--------------------------|-----------------------|-------------------------------------------------------------------------|--------------------|--|-------|---------|-----------|
| <input type="checkbox"/> |                       | <a href="#">transduction</a>                                            | <a href="#">RT</a> |  | 47    | 2.7E-2  | 6.4E-1    |
| <input type="checkbox"/> | GOTERM_BP_ALL         | <a href="#">regulation of signal transduction</a>                       | <a href="#">RT</a> |  | 56    | 3.8E-3  | 2.8E-1    |
| <input type="checkbox"/> | GOTERM_BP_ALL         | <a href="#">Ras protein signal transduction</a>                         | <a href="#">RT</a> |  | 29    | 5.0E-3  | 3.3E-1    |
| <input type="checkbox"/> | GOTERM_BP_ALL         | <a href="#">regulation of small GTPase mediated signal transduction</a> | <a href="#">RT</a> |  | 27    | 7.2E-3  | 3.7E-1    |
| <input type="checkbox"/> | GOTERM_MF_ALL         | <a href="#">guanyl-nucleotide exchange factor activity</a>              | <a href="#">RT</a> |  | 22    | 1.0E-2  | 7.8E-1    |
| <input type="checkbox"/> | GOTERM_MF_ALL         | <a href="#">Ras guanyl-nucleotide exchange factor activity</a>          | <a href="#">RT</a> |  | 14    | 1.9E-2  | 8.3E-1    |
| <input type="checkbox"/> | GOTERM_BP_ALL         | <a href="#">small GTPase mediated signal transduction</a>               | <a href="#">RT</a> |  | 47    | 2.7E-2  | 6.4E-1    |
| <input type="checkbox"/> | INTERPRO              | <a href="#">Guanine-nucleotide dissociation stimulator, CDC24</a>       | <a href="#">RT</a> |  | 8     | 2.7E-2  | 1.0E0     |
| <input type="checkbox"/> | GOTERM_MF_ALL         | <a href="#">GTPase regulator activity</a>                               | <a href="#">RT</a> |  | 40    | 3.0E-2  | 9.1E-1    |
| <input type="checkbox"/> | GOTERM_MF_ALL         | <a href="#">Rho guanyl-nucleotide exchange factor activity</a>          | <a href="#">RT</a> |  | 12    | 3.2E-2  | 9.1E-1    |
| <input type="checkbox"/> | GOTERM_BP_ALL         | <a href="#">regulation of Rho protein signal transduction</a>           | <a href="#">RT</a> |  | 12    | 5.1E-2  | 7.7E-1    |
| <input type="checkbox"/> | GOTERM_MF_ALL         | <a href="#">small GTPase regulator activity</a>                         | <a href="#">RT</a> |  | 25    | 5.2E-2  | 9.6E-1    |
| <input type="checkbox"/> | INTERPRO              | <a href="#">Rho GTP exchange factor</a>                                 | <a href="#">RT</a> |  | 4     | 6.2E-2  | 1.0E0     |
| <input type="checkbox"/> | INTERPRO              | <a href="#">DH</a>                                                      | <a href="#">RT</a> |  | 9     | 1.1E-1  | 1.0E0     |
| <input type="checkbox"/> | GOTERM_BP_ALL         | <a href="#">Rho protein signal transduction</a>                         | <a href="#">RT</a> |  | 13    | 1.4E-1  | 9.3E-1    |
| <input type="checkbox"/> | SMART                 | <a href="#">RhoGEF</a>                                                  | <a href="#">RT</a> |  | 9     | 1.7E-1  | 9.0E-1    |
| <input type="checkbox"/> | GOTERM_MF_ALL         | <a href="#">enzyme regulator activity</a>                               | <a href="#">RT</a> |  | 66    | 2.0E-1  | 1.0E0     |
| <input type="checkbox"/> | UP_SEQ_FEATURE        | domain:DH                                                               | <a href="#">RT</a> |  | 5     | 2.3E-1  | 1.0E0     |
| <input type="checkbox"/> | SP_PIR_KEYWORDS       | <a href="#">guanine-nucleotide releasing factor</a>                     | <a href="#">RT</a> |  | 9     | 2.9E-1  | 9.6E-1    |
|                          | Annotation Cluster 28 | Enrichment Score: 1.43                                                  | <b>G</b>           |  | Count | P_Value | Benjamini |
| <input type="checkbox"/> | GOTERM_BP_ALL         | <a href="#">response to external stimulus</a>                           | <a href="#">RT</a> |  | 60    | 5.6E-3  | 3.5E-1    |
| <input type="checkbox"/> | GOTERM_BP_ALL         | <a href="#">defense response</a>                                        | <a href="#">RT</a> |  | 56    | 1.0E-2  | 4.4E-1    |
| <input type="checkbox"/> | GOTERM_BP_ALL         | <a href="#">inflammatory response</a>                                   | <a href="#">RT</a> |  | 28    | 6.4E-2  | 8.1E-1    |
| <input type="checkbox"/> | GOTERM_BP_ALL         | <a href="#">response to wounding</a>                                    | <a href="#">RT</a> |  | 36    | 9.0E-2  | 8.7E-1    |
| <input type="checkbox"/> | GOTERM_BP_ALL         | <a href="#">response to stress</a>                                      | <a href="#">RT</a> |  | 79    | 2.2E-1  | 9.6E-1    |
|                          | Annotation Cluster 29 | Enrichment Score: 1.41                                                  | <b>G</b>           |  | Count | P_Value | Benjamini |
| <input type="checkbox"/> | UP_SEQ_FEATURE        | zinc finger region:RING-type                                            | <a href="#">RT</a> |  | 18    | 1.8E-2  | 1.0E0     |
| <input type="checkbox"/> | INTERPRO              | <a href="#">Zinc finger, RING-type</a>                                  | <a href="#">RT</a> |  | 30    | 2.8E-2  | 1.0E0     |
| <input type="checkbox"/> | SMART                 | <a href="#">RING</a>                                                    | <a href="#">RT</a> |  | 31    | 1.1E-1  | 8.6E-1    |
|                          | Annotation Cluster 30 | Enrichment Score: 1.4                                                   | <b>G</b>           |  | Count | P_Value | Benjamini |
| <input type="checkbox"/> | INTERPRO              | <a href="#">AT-rich interaction region</a>                              | <a href="#">RT</a> |  | 6     | 3.3E-3  | 9.1E-1    |
| <input type="checkbox"/> | SMART                 | <a href="#">BRIGHT</a>                                                  | <a href="#">RT</a> |  | 6     | 5.1E-3  | 5.4E-1    |
| <input type="checkbox"/> | INTERPRO              | <a href="#">Transcription factor jumonji</a>                            | <a href="#">RT</a> |  | 4     | 7.7E-2  | 1.0E0     |
| <input type="checkbox"/> | SMART                 | <a href="#">JmjC</a>                                                    | <a href="#">RT</a> |  | 5     | 8.4E-2  | 8.5E-1    |
| <input type="checkbox"/> | INTERPRO              | <a href="#">Transcription factor jumonji, JmjN</a>                      | <a href="#">RT</a> |  | 3     | 8.7E-2  | 1.0E0     |
| <input type="checkbox"/> | SMART                 | <a href="#">JmjN</a>                                                    | <a href="#">RT</a> |  | 3     | 1.0E-1  | 8.8E-1    |
| <input type="checkbox"/> | INTERPRO              | <a href="#">Transcription factor jumonji/aspartyl beta-hydroxylase</a>  | <a href="#">RT</a> |  | 4     | 1.5E-1  | 1.0E0     |
|                          | Annotation Cluster 31 | Enrichment Score: 1.39                                                  | <b>G</b>           |  | Count | P_Value | Benjamini |
| <input type="checkbox"/> | INTERPRO              | <a href="#">Zinc finger, CCCH-type</a>                                  | <a href="#">RT</a> |  | 10    | 1.3E-2  | 9.9E-1    |
| <input type="checkbox"/> | SMART                 | <a href="#">ZnF_C3H1</a>                                                | <a href="#">RT</a> |  | 10    | 3.0E-2  | 7.6E-1    |
| <input type="checkbox"/> | UP_SEQ_FEATURE        | zinc finger region:C3H1-type 1                                          | <a href="#">RT</a> |  | 4     | 8.2E-2  | 1.0E0     |
| <input type="checkbox"/> | UP_SEQ_FEATURE        | zinc finger region:C3H1-type 2                                          | <a href="#">RT</a> |  | 4     | 8.2E-2  | 1.0E0     |
|                          | Annotation Cluster 32 | Enrichment Score: 1.38                                                  | <b>G</b>           |  | Count | P_Value | Benjamini |
| <input type="checkbox"/> | GOTERM_BP_ALL         | <a href="#">positive regulation of cell adhesion</a>                    | <a href="#">RT</a> |  | 6     | 1.2E-2  | 4.6E-1    |
| <input type="checkbox"/> | GOTERM_BP_ALL         | <a href="#">regulation of cell adhesion</a>                             | <a href="#">RT</a> |  | 10    | 7.6E-2  | 8.5E-1    |
| <input type="checkbox"/> | GOTERM_BP_ALL         | <a href="#">regulation of cell-cell adhesion</a>                        | <a href="#">RT</a> |  | 4     | 7.8E-2  | 8.5E-1    |
|                          | Annotation Cluster 33 | Enrichment Score: 1.37                                                  | <b>G</b>           |  | Count | P_Value | Benjamini |
| <input type="checkbox"/> | GOTERM_BP_ALL         | <a href="#">negative regulation of progression</a>                      | <a href="#">RT</a> |  | 25    | 7.6E-1  | 9.5E-1    |

|                          |                       |                                                                  |                    |  | Count | P_Value | Benjamini |
|--------------------------|-----------------------|------------------------------------------------------------------|--------------------|--|-------|---------|-----------|
| <input type="checkbox"/> |                       | <a href="#">through cell cycle</a>                               | <a href="#">RT</a> |  | 23    | 7.0E-2  | 9.3E-2    |
| <input type="checkbox"/> | GOTERM_BP_ALL         | <a href="#">regulation of cell cycle</a>                         | <a href="#">RT</a> |  | 45    | 2.2E-2  | 6.0E-1    |
| <input type="checkbox"/> | GOTERM_BP_ALL         | <a href="#">regulation of progression through cell cycle</a>     | <a href="#">RT</a> |  | 43    | 4.4E-2  | 7.3E-1    |
| <input type="checkbox"/> | GOTERM_BP_ALL         | <a href="#">cell cycle process</a>                               | <a href="#">RT</a> |  | 54    | 3.8E-1  | 9.9E-1    |
| <input type="checkbox"/> | GOTERM_BP_ALL         | <a href="#">cell cycle</a>                                       | <a href="#">RT</a> |  | 64    | 5.3E-1  | 1.0E0     |
|                          | Annotation Cluster 34 | Enrichment Score: 1.34                                           | <b>G</b>           |  |       |         |           |
| <input type="checkbox"/> | GOTERM_MF_ALL         | <a href="#">cysteine-type peptidase activity</a>                 | <a href="#">RT</a> |  | 24    | 1.3E-2  | 7.7E-1    |
| <input type="checkbox"/> | SP_PIR_KEYWORDS       | <a href="#">thiol protease</a>                                   | <a href="#">RT</a> |  | 17    | 1.8E-2  | 4.4E-1    |
| <input type="checkbox"/> | PIR_SUPERFAMILY       | PIRSF001182:papain                                               | <a href="#">RT</a> |  | 5     | 2.2E-2  | 1.0E0     |
| <input type="checkbox"/> | INTERPRO              | <a href="#">Peptidase C1A, papain C-terminal</a>                 | <a href="#">RT</a> |  | 6     | 2.9E-2  | 1.0E0     |
| <input type="checkbox"/> | INTERPRO              | <a href="#">Peptidase, cysteine peptidase active site</a>        | <a href="#">RT</a> |  | 9     | 4.0E-2  | 1.0E0     |
| <input type="checkbox"/> | GOTERM_MF_ALL         | <a href="#">cysteine-type endopeptidase activity</a>             | <a href="#">RT</a> |  | 15    | 4.2E-2  | 9.4E-1    |
| <input type="checkbox"/> | SMART                 | <a href="#">Pept_C1</a>                                          | <a href="#">RT</a> |  | 6     | 5.1E-2  | 8.6E-1    |
| <input type="checkbox"/> | INTERPRO              | <a href="#">Proteinase inhibitor I29, cathepsin propeptide</a>   | <a href="#">RT</a> |  | 5     | 5.2E-2  | 1.0E0     |
| <input type="checkbox"/> | INTERPRO              | <a href="#">Peptidase C1A, papain</a>                            | <a href="#">RT</a> |  | 6     | 6.7E-2  | 1.0E0     |
| <input type="checkbox"/> | SP_PIR_KEYWORDS       | <a href="#">protease</a>                                         | <a href="#">RT</a> |  | 35    | 8.6E-1  | 1.0E0     |
|                          | Annotation Cluster 35 | Enrichment Score: 1.34                                           | <b>G</b>           |  |       |         |           |
| <input type="checkbox"/> | GOTERM_CC_ALL         | <a href="#">lamellipodium</a>                                    | <a href="#">RT</a> |  | 12    | 8.0E-3  | 5.0E-1    |
| <input type="checkbox"/> | GOTERM_CC_ALL         | <a href="#">leading edge</a>                                     | <a href="#">RT</a> |  | 16    | 1.5E-2  | 6.5E-1    |
| <input type="checkbox"/> | GOTERM_CC_ALL         | <a href="#">cell projection</a>                                  | <a href="#">RT</a> |  | 29    | 8.4E-1  | 1.0E0     |
|                          | Annotation Cluster 36 | Enrichment Score: 1.33                                           | <b>G</b>           |  |       |         |           |
| <input type="checkbox"/> | PIR_SUPERFAMILY       | PIRSF002387:myelin proteolipid protein                           | <a href="#">RT</a> |  | 3     | 2.2E-2  | 1.0E0     |
| <input type="checkbox"/> | INTERPRO              | <a href="#">Myelin proteolipid protein PLP</a>                   | <a href="#">RT</a> |  | 3     | 6.2E-2  | 1.0E0     |
| <input type="checkbox"/> | SMART                 | <a href="#">PLP</a>                                              | <a href="#">RT</a> |  | 3     | 7.4E-2  | 8.8E-1    |
|                          | Annotation Cluster 37 | Enrichment Score: 1.31                                           | <b>G</b>           |  |       |         |           |
| <input type="checkbox"/> | UP_SEQ_FEATURE        | repeat:BIR 3                                                     | <a href="#">RT</a> |  | 4     | 1.1E-2  | 1.0E0     |
| <input type="checkbox"/> | UP_SEQ_FEATURE        | repeat:BIR 1                                                     | <a href="#">RT</a> |  | 4     | 1.1E-2  | 1.0E0     |
| <input type="checkbox"/> | UP_SEQ_FEATURE        | repeat:BIR 2                                                     | <a href="#">RT</a> |  | 4     | 1.1E-2  | 1.0E0     |
| <input type="checkbox"/> | INTERPRO              | <a href="#">Proteinase inhibitor I32, inhibitor of apoptosis</a> | <a href="#">RT</a> |  | 4     | 3.6E-2  | 1.0E0     |
| <input type="checkbox"/> | SMART                 | <a href="#">BIR</a>                                              | <a href="#">RT</a> |  | 4     | 4.6E-2  | 8.5E-1    |
| <input type="checkbox"/> | BIOCARTA              | <a href="#">Role of Mitochondria in Apoptotic Signaling</a>      | <a href="#">RT</a> |  | 4     | 5.1E-1  | 1.0E0     |
| <input type="checkbox"/> | BIOCARTA              | <a href="#">Caspase Cascade in Apoptosis</a>                     | <a href="#">RT</a> |  | 4     | 5.4E-1  | 1.0E0     |
|                          | Annotation Cluster 38 | Enrichment Score: 1.29                                           | <b>G</b>           |  |       |         |           |
| <input type="checkbox"/> | GOTERM_BP_ALL         | <a href="#">histone modification</a>                             | <a href="#">RT</a> |  | 11    | 4.3E-3  | 3.1E-1    |
| <input type="checkbox"/> | GOTERM_BP_ALL         | <a href="#">protein amino acid alkylation</a>                    | <a href="#">RT</a> |  | 9     | 7.1E-3  | 3.8E-1    |
| <input type="checkbox"/> | GOTERM_BP_ALL         | <a href="#">protein amino acid methylation</a>                   | <a href="#">RT</a> |  | 9     | 7.1E-3  | 3.8E-1    |
| <input type="checkbox"/> | GOTERM_BP_ALL         | <a href="#">covalent chromatin modification</a>                  | <a href="#">RT</a> |  | 11    | 8.0E-3  | 3.9E-1    |
| <input type="checkbox"/> | GOTERM_BP_ALL         | <a href="#">histone methylation</a>                              | <a href="#">RT</a> |  | 6     | 1.6E-2  | 5.2E-1    |
| <input type="checkbox"/> | GOTERM_MF_ALL         | <a href="#">protein methyltransferase activity</a>               | <a href="#">RT</a> |  | 9     | 1.6E-2  | 8.2E-1    |
| <input type="checkbox"/> | GOTERM_BP_ALL         | <a href="#">biopolymer methylation</a>                           | <a href="#">RT</a> |  | 11    | 1.6E-2  | 5.2E-1    |
| <input type="checkbox"/> | UP_SEQ_FEATURE        | domain:Post-SET                                                  | <a href="#">RT</a> |  | 4     | 1.8E-2  | 1.0E0     |
| <input type="checkbox"/> | UP_SEQ_FEATURE        | zinc finger region:PHD-type 3                                    | <a href="#">RT</a> |  | 3     | 2.2E-2  | 1.0E0     |
| <input type="checkbox"/> | GOTERM_BP_ALL         | <a href="#">methylation</a>                                      | <a href="#">RT</a> |  | 11    | 2.3E-2  | 6.0E-1    |
| <input type="checkbox"/> | UP_SEQ_FEATURE        | domain:SET                                                       | <a href="#">RT</a> |  | 5     | 2.9E-2  | 1.0E0     |
| <input type="checkbox"/> | UP_SEQ_FEATURE        | zinc finger region:PHD-type 2                                    | <a href="#">RT</a> |  | 5     | 3.7E-2  | 1.0E0     |
| <input type="checkbox"/> | UP_SEQ_FEATURE        | zinc finger region:PHD-type 1                                    | <a href="#">RT</a> |  | 5     | 4.6E-2  | 1.0E0     |
| <input type="checkbox"/> | GOTERM_MF_ALL         | <a href="#">lysine N-methyltransferase activity</a>              | <a href="#">RT</a> |  | 5     | 6.2E-2  | 9.6E-1    |
| <input type="checkbox"/> | GOTERM_MF_ALL         | <a href="#">protein-lysine N-methyltransferase activity</a>      | <a href="#">RT</a> |  | 5     | 6.2E-2  | 9.6E-1    |



| <input type="checkbox"/> | GOTERM_MF_ALL         | <a href="#">histone-lysine N-methyltransferase activity</a>                        | RT       |  |  |  | 5     | 6.2E-2  | 9.6E-1    |  |
|--------------------------|-----------------------|------------------------------------------------------------------------------------|----------|--|--|--|-------|---------|-----------|--|
| <input type="checkbox"/> | GOTERM_MF_ALL         | <a href="#">histone methyltransferase activity</a>                                 | RT       |  |  |  | 6     | 7.6E-2  | 9.7E-1    |  |
| <input type="checkbox"/> | INTERPRO              | <a href="#">Post-SET zinc-binding region</a>                                       | RT       |  |  |  | 4     | 9.4E-2  | 1.0E0     |  |
| <input type="checkbox"/> | SMART                 | <a href="#">PostSET</a>                                                            | RT       |  |  |  | 4     | 1.2E-1  | 8.5E-1    |  |
| <input type="checkbox"/> | SP_PIR_KEYWORDS       | <a href="#">s-adenosyl-l-methionine</a>                                            | RT       |  |  |  | 10    | 1.3E-1  | 8.5E-1    |  |
| <input type="checkbox"/> | INTERPRO              | <a href="#">SET</a>                                                                | RT       |  |  |  | 7     | 1.4E-1  | 1.0E0     |  |
| <input type="checkbox"/> | GOTERM_BP_ALL         | <a href="#">one-carbon compound metabolic process</a>                              | RT       |  |  |  | 12    | 1.6E-1  | 9.4E-1    |  |
| <input type="checkbox"/> | GOTERM_MF_ALL         | <a href="#">S-adenosylmethionine-dependent methyltransferase activity</a>          | RT       |  |  |  | 10    | 1.8E-1  | 9.9E-1    |  |
| <input type="checkbox"/> | SMART                 | <a href="#">SET</a>                                                                | RT       |  |  |  | 7     | 1.9E-1  | 9.1E-1    |  |
| <input type="checkbox"/> | GOTERM_MF_ALL         | <a href="#">N-methyltransferase activity</a>                                       | RT       |  |  |  | 6     | 2.5E-1  | 1.0E0     |  |
| <input type="checkbox"/> | GOTERM_MF_ALL         | <a href="#">methyltransferase activity</a>                                         | RT       |  |  |  | 17    | 3.1E-1  | 1.0E0     |  |
| <input type="checkbox"/> | GOTERM_MF_ALL         | <a href="#">transferase activity, transferring one-carbon groups</a>               | RT       |  |  |  | 17    | 3.4E-1  | 1.0E0     |  |
| <input type="checkbox"/> | SP_PIR_KEYWORDS       | <a href="#">methyltransferase</a>                                                  | RT       |  |  |  | 11    | 5.1E-1  | 9.9E-1    |  |
|                          | Annotation Cluster 39 | Enrichment Score: 1.26                                                             | <b>G</b> |  |  |  | Count | P_Value | Benjamini |  |
| <input type="checkbox"/> | INTERPRO              | <a href="#">Protein kinase C, phorbol ester/diacylglycerol binding</a>             | RT       |  |  |  | 13    | 5.1E-3  | 9.3E-1    |  |
| <input type="checkbox"/> | SMART                 | <a href="#">C1</a>                                                                 | RT       |  |  |  | 13    | 1.1E-2  | 5.7E-1    |  |
| <input type="checkbox"/> | UP_SEQ_FEATURE        | zinc finger region:Phorbol-ester/DAG-type 1                                        | RT       |  |  |  | 5     | 1.7E-2  | 1.0E0     |  |
| <input type="checkbox"/> | UP_SEQ_FEATURE        | zinc finger region:Phorbol-ester/DAG-type 2                                        | RT       |  |  |  | 5     | 1.7E-2  | 1.0E0     |  |
| <input type="checkbox"/> | SP_PIR_KEYWORDS       | <a href="#">serine/threonine-specific protein kinase</a>                           | RT       |  |  |  | 8     | 2.9E-2  | 5.5E-1    |  |
| <input type="checkbox"/> | GOTERM_MF_ALL         | <a href="#">diacylglycerol binding</a>                                             | RT       |  |  |  | 10    | 3.1E-2  | 9.1E-1    |  |
| <input type="checkbox"/> | SP_PIR_KEYWORDS       | <a href="#">phospholipid binding</a>                                               | RT       |  |  |  | 4     | 7.5E-2  | 7.6E-1    |  |
| <input type="checkbox"/> | GOTERM_MF_ALL         | <a href="#">protein kinase C activity</a>                                          | RT       |  |  |  | 4     | 1.3E-1  | 9.9E-1    |  |
| <input type="checkbox"/> | SP_PIR_KEYWORDS       | <a href="#">phorbol ester binding</a>                                              | RT       |  |  |  | 3     | 1.4E-1  | 8.8E-1    |  |
| <input type="checkbox"/> | GOTERM_MF_ALL         | <a href="#">phorbol ester receptor activity</a>                                    | RT       |  |  |  | 4     | 1.7E-1  | 1.0E0     |  |
| <input type="checkbox"/> | INTERPRO              | <a href="#">Protein kinase C</a>                                                   | RT       |  |  |  | 3     | 1.8E-1  | 1.0E0     |  |
| <input type="checkbox"/> | UP_SEQ_FEATURE        | domain:C2                                                                          | RT       |  |  |  | 6     | 2.4E-1  | 1.0E0     |  |
| <input type="checkbox"/> | SP_PIR_KEYWORDS       | <a href="#">Phorbol-ester binding</a>                                              | RT       |  |  |  | 6     | 3.0E-1  | 9.7E-1    |  |
|                          | Annotation Cluster 40 | Enrichment Score: 1.24                                                             | <b>G</b> |  |  |  | Count | P_Value | Benjamini |  |
| <input type="checkbox"/> | INTERPRO              | <a href="#">Receptor activity modifying protein</a>                                | RT       |  |  |  | 3     | 2.1E-2  | 1.0E0     |  |
| <input type="checkbox"/> | GOTERM_BP_ALL         | <a href="#">regulation of G-protein coupled receptor protein signaling pathway</a> | RT       |  |  |  | 6     | 4.3E-2  | 7.3E-1    |  |
| <input type="checkbox"/> | GOTERM_MF_ALL         | <a href="#">coreceptor activity</a>                                                | RT       |  |  |  | 3     | 2.1E-1  | 1.0E0     |  |
|                          | Annotation Cluster 41 | Enrichment Score: 1.19                                                             | <b>G</b> |  |  |  | Count | P_Value | Benjamini |  |
| <input type="checkbox"/> | GOTERM_BP_ALL         | <a href="#">cell-matrix adhesion</a>                                               | RT       |  |  |  | 15    | 7.9E-3  | 3.9E-1    |  |
| <input type="checkbox"/> | GOTERM_BP_ALL         | <a href="#">regulation of cell motility</a>                                        | RT       |  |  |  | 13    | 3.4E-2  | 6.9E-1    |  |
| <input type="checkbox"/> | GOTERM_BP_ALL         | <a href="#">regulation of locomotion</a>                                           | RT       |  |  |  | 13    | 4.8E-2  | 7.5E-1    |  |
| <input type="checkbox"/> | GOTERM_BP_ALL         | <a href="#">negative regulation of cell motility</a>                               | RT       |  |  |  | 6     | 5.9E-2  | 8.0E-1    |  |
| <input type="checkbox"/> | GOTERM_BP_ALL         | <a href="#">negative regulation of locomotion</a>                                  | RT       |  |  |  | 6     | 6.8E-2  | 8.3E-1    |  |
| <input type="checkbox"/> | GOTERM_BP_ALL         | <a href="#">locomotion</a>                                                         | RT       |  |  |  | 13    | 8.5E-2  | 8.6E-1    |  |
| <input type="checkbox"/> | GOTERM_BP_ALL         | <a href="#">regulation of cell migration</a>                                       | RT       |  |  |  | 10    | 1.4E-1  | 9.2E-1    |  |
| <input type="checkbox"/> | GOTERM_BP_ALL         | <a href="#">negative regulation of cell migration</a>                              | RT       |  |  |  | 3     | 5.2E-1  | 1.0E0     |  |
|                          | Annotation Cluster 42 | Enrichment Score: 1.19                                                             | <b>G</b> |  |  |  | Count | P_Value | Benjamini |  |
| <input type="checkbox"/> | BIOCARTA              | <a href="#">Control of Gene Expression by Vitamin D Receptor</a>                   | RT       |  |  |  | 8     | 4.3E-2  | 9.6E-1    |  |
| <input type="checkbox"/> | BIOCARTA              | <a href="#">Role of PPAR-gamma Coactivators in Obesity and Thermoogenesis</a>      | RT       |  |  |  | 5     | 4.7E-2  | 9.0E-1    |  |
| <input type="checkbox"/> | BIOCARTA              | <a href="#">Transcription Regulation by Methyltransferase of CARM1</a>             | RT       |  |  |  | 4     | 1.4E-1  | 9.9E-1    |  |
|                          | Annotation Cluster 43 | Enrichment Score: 1.18                                                             | <b>G</b> |  |  |  | Count | P_Value | Benjamini |  |
| <input type="checkbox"/> | GOTERM_BP_ALL         | <a href="#">determination of left/right symmetry</a>                               | RT       |  |  |  | 8     | 2.4E-2  | 6.1E-1    |  |

| <input type="checkbox"/> | GOTERM_BP_ALL         | <a href="#">determination of symmetry</a>                             | <a href="#">RT</a> |  |  |  | 8     | 2.7E-2  | 6.4E-1    |
|--------------------------|-----------------------|-----------------------------------------------------------------------|--------------------|--|--|--|-------|---------|-----------|
| <input type="checkbox"/> | GOTERM_BP_ALL         | <a href="#">determination of bilateral symmetry</a>                   | <a href="#">RT</a> |  |  |  | 8     | 2.7E-2  | 6.4E-1    |
| <input type="checkbox"/> | GOTERM_BP_ALL         | <a href="#">dorsal/ventral pattern formation</a>                      | <a href="#">RT</a> |  |  |  | 7     | 1.6E-1  | 9.4E-1    |
| <input type="checkbox"/> | GOTERM_BP_ALL         | <a href="#">smoothened signaling pathway</a>                          | <a href="#">RT</a> |  |  |  | 4     | 4.4E-1  | 9.9E-1    |
|                          | Annotation Cluster 44 | Enrichment Score: 1.18                                                | <b>G</b>           |  |  |  | Count | P_Value | Benjamini |
| <input type="checkbox"/> | GOTERM_BP_ALL         | <a href="#">chondrocyte differentiation</a>                           | <a href="#">RT</a> |  |  |  | 7     | 3.0E-3  | 2.6E-1    |
| <input type="checkbox"/> | GOTERM_BP_ALL         | <a href="#">regulation of chondrocyte differentiation</a>             | <a href="#">RT</a> |  |  |  | 3     | 4.0E-2  | 7.1E-1    |
| <input type="checkbox"/> | GOTERM_BP_ALL         | <a href="#">negative regulation of chondrocyte differentiation</a>    | <a href="#">RT</a> |  |  |  | 3     | 4.0E-2  | 7.1E-1    |
| <input type="checkbox"/> | KEGG_PATHWAY          | <a href="#">Hedgehog signaling pathway</a>                            | <a href="#">RT</a> |  |  |  | 7     | 3.2E-1  | 8.4E-1    |
| <input type="checkbox"/> | KEGG_PATHWAY          | <a href="#">Basal cell carcinoma</a>                                  | <a href="#">RT</a> |  |  |  | 4     | 8.7E-1  | 9.9E-1    |
|                          | Annotation Cluster 45 | Enrichment Score: 1.16                                                | <b>G</b>           |  |  |  | Count | P_Value | Benjamini |
| <input type="checkbox"/> | GOTERM_BP_ALL         | <a href="#">cell activation</a>                                       | <a href="#">RT</a> |  |  |  | 37    | 2.0E-3  | 2.0E-1    |
| <input type="checkbox"/> | GOTERM_BP_ALL         | <a href="#">regulation of cell activation</a>                         | <a href="#">RT</a> |  |  |  | 19    | 4.9E-3  | 3.3E-1    |
| <input type="checkbox"/> | GOTERM_BP_ALL         | <a href="#">leukocyte activation</a>                                  | <a href="#">RT</a> |  |  |  | 33    | 7.7E-3  | 3.9E-1    |
| <input type="checkbox"/> | GOTERM_BP_ALL         | <a href="#">regulation of lymphocyte proliferation</a>                | <a href="#">RT</a> |  |  |  | 12    | 2.0E-2  | 5.8E-1    |
| <input type="checkbox"/> | GOTERM_BP_ALL         | <a href="#">regulation of mononuclear cell proliferation</a>          | <a href="#">RT</a> |  |  |  | 12    | 2.0E-2  | 5.8E-1    |
| <input type="checkbox"/> | GOTERM_BP_ALL         | <a href="#">positive regulation of T cell proliferation</a>           | <a href="#">RT</a> |  |  |  | 8     | 2.4E-2  | 6.1E-1    |
| <input type="checkbox"/> | GOTERM_BP_ALL         | <a href="#">regulation of lymphocyte activation</a>                   | <a href="#">RT</a> |  |  |  | 15    | 5.8E-2  | 8.0E-1    |
| <input type="checkbox"/> | GOTERM_BP_ALL         | <a href="#">lymphocyte activation</a>                                 | <a href="#">RT</a> |  |  |  | 27    | 5.9E-2  | 8.0E-1    |
| <input type="checkbox"/> | GOTERM_BP_ALL         | <a href="#">regulation of T cell proliferation</a>                    | <a href="#">RT</a> |  |  |  | 9     | 6.9E-2  | 8.3E-1    |
| <input type="checkbox"/> | GOTERM_BP_ALL         | <a href="#">regulation of multicellular organismal process</a>        | <a href="#">RT</a> |  |  |  | 36    | 7.1E-2  | 8.3E-1    |
| <input type="checkbox"/> | GOTERM_BP_ALL         | <a href="#">mononuclear cell proliferation</a>                        | <a href="#">RT</a> |  |  |  | 13    | 7.4E-2  | 8.5E-1    |
| <input type="checkbox"/> | GOTERM_BP_ALL         | <a href="#">lymphocyte proliferation</a>                              | <a href="#">RT</a> |  |  |  | 13    | 7.4E-2  | 8.5E-1    |
| <input type="checkbox"/> | GOTERM_BP_ALL         | <a href="#">positive regulation of lymphocyte proliferation</a>       | <a href="#">RT</a> |  |  |  | 8     | 8.1E-2  | 8.5E-1    |
| <input type="checkbox"/> | GOTERM_BP_ALL         | <a href="#">positive regulation of mononuclear cell proliferation</a> | <a href="#">RT</a> |  |  |  | 8     | 8.1E-2  | 8.5E-1    |
| <input type="checkbox"/> | GOTERM_BP_ALL         | <a href="#">positive regulation of T cell activation</a>              | <a href="#">RT</a> |  |  |  | 9     | 8.2E-2  | 8.6E-1    |
| <input type="checkbox"/> | GOTERM_BP_ALL         | <a href="#">T cell proliferation</a>                                  | <a href="#">RT</a> |  |  |  | 10    | 1.0E-1  | 9.0E-1    |
| <input type="checkbox"/> | GOTERM_BP_ALL         | <a href="#">regulation of T cell activation</a>                       | <a href="#">RT</a> |  |  |  | 11    | 1.5E-1  | 9.3E-1    |
| <input type="checkbox"/> | GOTERM_BP_ALL         | <a href="#">positive regulation of lymphocyte activation</a>          | <a href="#">RT</a> |  |  |  | 10    | 1.7E-1  | 9.4E-1    |
| <input type="checkbox"/> | GOTERM_BP_ALL         | <a href="#">positive regulation of activated T cell proliferation</a> | <a href="#">RT</a> |  |  |  | 3     | 2.4E-1  | 9.7E-1    |
| <input type="checkbox"/> | GOTERM_BP_ALL         | <a href="#">regulation of activated T cell proliferation</a>          | <a href="#">RT</a> |  |  |  | 3     | 2.8E-1  | 9.7E-1    |
| <input type="checkbox"/> | GOTERM_BP_ALL         | <a href="#">T cell activation</a>                                     | <a href="#">RT</a> |  |  |  | 15    | 3.3E-1  | 9.8E-1    |
| <input type="checkbox"/> | GOTERM_BP_ALL         | <a href="#">positive regulation of cell proliferation</a>             | <a href="#">RT</a> |  |  |  | 21    | 3.8E-1  | 9.9E-1    |
| <input type="checkbox"/> | GOTERM_BP_ALL         | <a href="#">activated T cell proliferation</a>                        | <a href="#">RT</a> |  |  |  | 3     | 4.1E-1  | 9.9E-1    |
| <input type="checkbox"/> | GOTERM_BP_ALL         | <a href="#">regulation of lymphocyte differentiation</a>              | <a href="#">RT</a> |  |  |  | 4     | 4.2E-1  | 9.9E-1    |
|                          | Annotation Cluster 46 | Enrichment Score: 1.14                                                | <b>G</b>           |  |  |  | Count | P_Value | Benjamini |
| <input type="checkbox"/> | INTERPRO              | <a href="#">Protein kinase, C-terminal</a>                            | <a href="#">RT</a> |  |  |  | 10    | 3.9E-2  | 1.0E0     |
| <input type="checkbox"/> | UP_SEQ_FEATURE        | domain:AGC-kinase C-terminal                                          | <a href="#">RT</a> |  |  |  | 9     | 5.7E-2  | 1.0E0     |
| <input type="checkbox"/> | SMART                 | <a href="#">S TK X</a>                                                | <a href="#">RT</a> |  |  |  | 10    | 6.6E-2  | 8.9E-1    |
| <input type="checkbox"/> | INTERPRO              | <a href="#">Serine/threonine protein kinase</a>                       | <a href="#">RT</a> |  |  |  | 23    | 1.8E-1  | 1.0E0     |
|                          | Annotation Cluster 47 | Enrichment Score: 1.08                                                | <b>G</b>           |  |  |  | Count | P_Value | Benjamini |
| <input type="checkbox"/> | INTERPRO              | <a href="#">Zinc finger, MYM-type</a>                                 | <a href="#">RT</a> |  |  |  | 3     | 6.2E-2  | 1.0E0     |
| <input type="checkbox"/> | INTERPRO              | <a href="#">TRASH</a>                                                 | <a href="#">RT</a> |  |  |  | 3     | 8.7E-2  | 1.0E0     |
| <input type="checkbox"/> | SMART                 | <a href="#">TRASH</a>                                                 | <a href="#">RT</a> |  |  |  | 3     | 1.0E-1  | 8.8E-1    |
|                          | Annotation Cluster 48 | Enrichment Score: 1.07                                                | <b>G</b>           |  |  |  | Count | P_Value | Benjamini |
| <input type="checkbox"/> | GOTERM_BP_ALL         | <a href="#">cell migration</a>                                        | <a href="#">RT</a> |  |  |  | 36    | 5.8E-2  | 8.0E-1    |
| <input type="checkbox"/> | GOTERM_BP_ALL         | <a href="#">cell motility</a>                                         | <a href="#">RT</a> |  |  |  | 40    | 1.0E-1  | 8.9E-1    |

| <input type="checkbox"/> | GOTERM_BP_ALL         | <a href="#">localization of cell</a>                                       | <a href="#">RT</a> |  |  |  |  | 40    | 1.0E-1  | 8.9E-1    |
|--------------------------|-----------------------|----------------------------------------------------------------------------|--------------------|--|--|--|--|-------|---------|-----------|
|                          | Annotation Cluster 49 | Enrichment Score: 1.03                                                     | <b>G</b>           |  |  |  |  | Count | P_Value | Benjamini |
| <input type="checkbox"/> | GOTERM_BP_ALL         | <a href="#">multicellular organism growth</a>                              | <a href="#">RT</a> |  |  |  |  | 10    | 7.6E-2  | 8.5E-1    |
| <input type="checkbox"/> | GOTERM_BP_ALL         | <a href="#">regulation of multicellular organism growth</a>                | <a href="#">RT</a> |  |  |  |  | 9     | 8.2E-2  | 8.6E-1    |
| <input type="checkbox"/> | GOTERM_BP_ALL         | <a href="#">regulation of growth</a>                                       | <a href="#">RT</a> |  |  |  |  | 21    | 1.3E-1  | 9.2E-1    |
|                          | Annotation Cluster 50 | Enrichment Score: 1.02                                                     | <b>G</b>           |  |  |  |  | Count | P_Value | Benjamini |
| <input type="checkbox"/> | SP_PIR_KEYWORDS       | <a href="#">biological rhythms</a>                                         | <a href="#">RT</a> |  |  |  |  | 7     | 2.8E-3  | 1.6E-1    |
| <input type="checkbox"/> | KEGG_PATHWAY          | <a href="#">Circadian rhythm</a>                                           | <a href="#">RT</a> |  |  |  |  | 5     | 2.0E-2  | 4.6E-1    |
| <input type="checkbox"/> | UP_SEQ_FEATURE        | region of interest:CRY binding domain                                      | <a href="#">RT</a> |  |  |  |  | 3     | 2.2E-2  | 1.0E0     |
| <input type="checkbox"/> | UP_SEQ_FEATURE        | region of interest:CSNK1E binding domain                                   | <a href="#">RT</a> |  |  |  |  | 3     | 2.2E-2  | 1.0E0     |
| <input type="checkbox"/> | INTERPRO              | <a href="#">PAS</a>                                                        | <a href="#">RT</a> |  |  |  |  | 7     | 3.4E-2  | 1.0E0     |
| <input type="checkbox"/> | GOTERM_BP_ALL         | <a href="#">xenobiotic metabolic process</a>                               | <a href="#">RT</a> |  |  |  |  | 5     | 3.5E-2  | 6.8E-1    |
| <input type="checkbox"/> | GOTERM_MF_ALL         | <a href="#">protein histidine kinase activity</a>                          | <a href="#">RT</a> |  |  |  |  | 6     | 4.2E-2  | 9.4E-1    |
| <input type="checkbox"/> | INTERPRO              | <a href="#">PAC motif</a>                                                  | <a href="#">RT</a> |  |  |  |  | 6     | 4.2E-2  | 1.0E0     |
| <input type="checkbox"/> | GOTERM_BP_ALL         | <a href="#">response to xenobiotic stimulus</a>                            | <a href="#">RT</a> |  |  |  |  | 5     | 5.3E-2  | 7.7E-1    |
| <input type="checkbox"/> | SMART                 | <a href="#">PAS</a>                                                        | <a href="#">RT</a> |  |  |  |  | 7     | 5.9E-2  | 8.9E-1    |
| <input type="checkbox"/> | GOTERM_MF_ALL         | <a href="#">two-component sensor activity</a>                              | <a href="#">RT</a> |  |  |  |  | 5     | 6.2E-2  | 9.6E-1    |
| <input type="checkbox"/> | SMART                 | <a href="#">PAC</a>                                                        | <a href="#">RT</a> |  |  |  |  | 6     | 7.1E-2  | 8.8E-1    |
| <input type="checkbox"/> | GOTERM_MF_ALL         | <a href="#">phosphotransferase activity, nitrogenous group as acceptor</a> | <a href="#">RT</a> |  |  |  |  | 6     | 8.6E-2  | 9.8E-1    |
| <input type="checkbox"/> | INTERPRO              | <a href="#">PAS fold-3</a>                                                 | <a href="#">RT</a> |  |  |  |  | 5     | 8.6E-2  | 1.0E0     |
| <input type="checkbox"/> | GOTERM_BP_ALL         | <a href="#">circadian rhythm</a>                                           | <a href="#">RT</a> |  |  |  |  | 6     | 8.8E-2  | 8.7E-1    |
| <input type="checkbox"/> | UP_SEQ_FEATURE        | short sequence motif:Nuclear export signal                                 | <a href="#">RT</a> |  |  |  |  | 5     | 1.4E-1  | 1.0E0     |
| <input type="checkbox"/> | UP_SEQ_FEATURE        | domain:PAS 1                                                               | <a href="#">RT</a> |  |  |  |  | 4     | 1.6E-1  | 1.0E0     |
| <input type="checkbox"/> | UP_SEQ_FEATURE        | domain:PAS 2                                                               | <a href="#">RT</a> |  |  |  |  | 4     | 1.6E-1  | 1.0E0     |
| <input type="checkbox"/> | GOTERM_BP_ALL         | <a href="#">two-component signal transduction system (phosphorelay)</a>    | <a href="#">RT</a> |  |  |  |  | 5     | 2.0E-1  | 9.6E-1    |
| <input type="checkbox"/> | UP_SEQ_FEATURE        | DNA-binding region:Basic motif                                             | <a href="#">RT</a> |  |  |  |  | 13    | 2.8E-1  | 1.0E0     |
| <input type="checkbox"/> | INTERPRO              | <a href="#">PAS fold</a>                                                   | <a href="#">RT</a> |  |  |  |  | 4     | 2.9E-1  | 1.0E0     |
| <input type="checkbox"/> | UP_SEQ_FEATURE        | domain:PAC                                                                 | <a href="#">RT</a> |  |  |  |  | 4     | 3.1E-1  | 1.0E0     |
| <input type="checkbox"/> | INTERPRO              | <a href="#">Basic helix-loop-helix dimerisation region bHLH</a>            | <a href="#">RT</a> |  |  |  |  | 9     | 6.6E-1  | 1.0E0     |
| <input type="checkbox"/> | SMART                 | <a href="#">HLH</a>                                                        | <a href="#">RT</a> |  |  |  |  | 9     | 8.2E-1  | 1.0E0     |
| <input type="checkbox"/> | UP_SEQ_FEATURE        | domain:Helix-loop-helix motif                                              | <a href="#">RT</a> |  |  |  |  | 6     | 8.3E-1  | 1.0E0     |
| <input type="checkbox"/> | INTERPRO              | <a href="#">Helix-loop-helix DNA-binding</a>                               | <a href="#">RT</a> |  |  |  |  | 5     | 9.2E-1  | 1.0E0     |
|                          | Annotation Cluster 51 | Enrichment Score: 1.01                                                     | <b>G</b>           |  |  |  |  | Count | P_Value | Benjamini |
| <input type="checkbox"/> | GOTERM_MF_ALL         | <a href="#">NAD+ ADP-ribosyltransferase activity</a>                       | <a href="#">RT</a> |  |  |  |  | 5     | 4.2E-2  | 9.4E-1    |
| <input type="checkbox"/> | GOTERM_MF_ALL         | <a href="#">transferase activity, transferring pentosyl groups</a>         | <a href="#">RT</a> |  |  |  |  | 8     | 6.4E-2  | 9.6E-1    |
| <input type="checkbox"/> | INTERPRO              | <a href="#">Poly(ADP-ribose) polymerase, catalytic region</a>              | <a href="#">RT</a> |  |  |  |  | 3     | 3.4E-1  | 1.0E0     |
|                          | Annotation Cluster 52 | Enrichment Score: 1                                                        | <b>G</b>           |  |  |  |  | Count | P_Value | Benjamini |
| <input type="checkbox"/> | GOTERM_BP_ALL         | <a href="#">protein amino acid autophosphorylation</a>                     | <a href="#">RT</a> |  |  |  |  | 8     | 8.1E-2  | 8.5E-1    |
| <input type="checkbox"/> | GOTERM_BP_ALL         | <a href="#">protein autoprocessing</a>                                     | <a href="#">RT</a> |  |  |  |  | 8     | 1.1E-1  | 8.9E-1    |
| <input type="checkbox"/> | GOTERM_BP_ALL         | <a href="#">protein processing</a>                                         | <a href="#">RT</a> |  |  |  |  | 12    | 1.2E-1  | 9.1E-1    |
|                          | Annotation Cluster 53 | Enrichment Score: 0.96                                                     | <b>G</b>           |  |  |  |  | Count | P_Value | Benjamini |
| <input type="checkbox"/> | SP_PIR_KEYWORDS       | <a href="#">inflammation</a>                                               | <a href="#">RT</a> |  |  |  |  | 6     | 1.4E-2  | 4.0E-1    |
| <input type="checkbox"/> | SP_PIR_KEYWORDS       | <a href="#">calcium binding</a>                                            | <a href="#">RT</a> |  |  |  |  | 10    | 4.4E-2  | 6.6E-1    |
| <input type="checkbox"/> | PIR_SUPERFAMILY       | PIRSF002353:S-100 protein                                                  | <a href="#">RT</a> |  |  |  |  | 4     | 9.9E-2  | 1.0E0     |
| <input type="checkbox"/> | INTERPRO              | <a href="#">S100/CaBP-9k-type, calcium binding, subdomain</a>              | <a href="#">RT</a> |  |  |  |  | 4     | 2.0E-1  | 1.0E0     |
| <input type="checkbox"/> | INTERPRO              | <a href="#">S100/CaBP-9k-type, calcium binding</a>                         | <a href="#">RT</a> |  |  |  |  | 4     | 2.7E-1  | 1.0E0     |
| <input type="checkbox"/> | SP_PIR_KEYWORDS       | <a href="#">EF hand</a>                                                    | <a href="#">RT</a> |  |  |  |  | 4     | 4.9E-1  | 9.9E-1    |

| Annotation Cluster 54    |                | Enrichment Score: 0.95                                                                                                                                           | G  |  | Count | P_Value | Benjamini |
|--------------------------|----------------|------------------------------------------------------------------------------------------------------------------------------------------------------------------|----|--|-------|---------|-----------|
| <input type="checkbox"/> | GOTERM_BP_ALL  | <a href="#">cell proliferation</a>                                                                                                                               | RT |  | 61    | 3.8E-2  | 7.0E-1    |
| <input type="checkbox"/> | GOTERM_BP_ALL  | <a href="#">regulation of cell proliferation</a>                                                                                                                 | RT |  | 42    | 9.7E-2  | 8.8E-1    |
| <input type="checkbox"/> | GOTERM_BP_ALL  | <a href="#">positive regulation of cell proliferation</a>                                                                                                        | RT |  | 21    | 3.8E-1  | 9.9E-1    |
| Annotation Cluster 55    |                | Enrichment Score: 0.94                                                                                                                                           | G  |  | Count | P_Value | Benjamini |
| <input type="checkbox"/> | INTERPRO       | <a href="#">Peptidoglycan-binding LysM</a>                                                                                                                       | RT |  | 3     | 8.7E-2  | 1.0E0     |
| <input type="checkbox"/> | SMART          | <a href="#">LysM</a>                                                                                                                                             | RT |  | 3     | 1.0E-1  | 8.8E-1    |
| <input type="checkbox"/> | GOTERM_BP_ALL  | <a href="#">cell wall catabolic process</a>                                                                                                                      | RT |  | 4     | 1.1E-1  | 9.0E-1    |
| <input type="checkbox"/> | GOTERM_BP_ALL  | <a href="#">cell wall metabolic process</a>                                                                                                                      | RT |  | 4     | 1.1E-1  | 9.0E-1    |
| <input type="checkbox"/> | GOTERM_BP_ALL  | <a href="#">cell wall organization and biogenesis</a>                                                                                                            | RT |  | 4     | 1.3E-1  | 9.2E-1    |
| <input type="checkbox"/> | GOTERM_BP_ALL  | <a href="#">external encapsulating structure organization and biogenesis</a>                                                                                     | RT |  | 4     | 1.5E-1  | 9.4E-1    |
| Annotation Cluster 56    |                | Enrichment Score: 0.93                                                                                                                                           | G  |  | Count | P_Value | Benjamini |
| <input type="checkbox"/> | INTERPRO       | <a href="#">Basic-leucine zipper (bZIP) transcription factor</a>                                                                                                 | RT |  | 11    | 9.0E-3  | 9.8E-1    |
| <input type="checkbox"/> | SMART          | <a href="#">BRLZ</a>                                                                                                                                             | RT |  | 11    | 2.6E-2  | 7.3E-1    |
| <input type="checkbox"/> | INTERPRO       | <a href="#">Basic leucine zipper</a>                                                                                                                             | RT |  | 4     | 2.0E-1  | 1.0E0     |
| <input type="checkbox"/> | UP_SEQ_FEATURE | domain:Leucine-zipper                                                                                                                                            | RT |  | 11    | 2.4E-1  | 1.0E0     |
| <input type="checkbox"/> | UP_SEQ_FEATURE | DNA-binding region:Basic motif                                                                                                                                   | RT |  | 13    | 2.8E-1  | 1.0E0     |
| <input type="checkbox"/> | GOTERM_MF_ALL  | <a href="#">protein dimerization activity</a>                                                                                                                    | RT |  | 28    | 2.8E-1  | 1.0E0     |
| <input type="checkbox"/> | INTERPRO       | <a href="#">bZIP transcription factor, bZIP-1</a>                                                                                                                | RT |  | 4     | 3.4E-1  | 1.0E0     |
| Annotation Cluster 57    |                | Enrichment Score: 0.93                                                                                                                                           | G  |  | Count | P_Value | Benjamini |
| <input type="checkbox"/> | GOTERM_BP_ALL  | <a href="#">phagocytosis, engulfment</a>                                                                                                                         | RT |  | 6     | 3.4E-3  | 2.7E-1    |
| <input type="checkbox"/> | GOTERM_BP_ALL  | <a href="#">positive regulation of inflammatory response</a>                                                                                                     | RT |  | 6     | 6.8E-3  | 3.7E-1    |
| <input type="checkbox"/> | GOTERM_BP_ALL  | <a href="#">positive regulation of defense response</a>                                                                                                          | RT |  | 6     | 6.8E-3  | 3.7E-1    |
| <input type="checkbox"/> | GOTERM_BP_ALL  | <a href="#">regulation of immune effector process</a>                                                                                                            | RT |  | 6     | 1.2E-2  | 4.6E-1    |
| <input type="checkbox"/> | GOTERM_BP_ALL  | <a href="#">regulation of inflammatory response</a>                                                                                                              | RT |  | 8     | 1.7E-2  | 5.4E-1    |
| <input type="checkbox"/> | GOTERM_BP_ALL  | <a href="#">regulation of defense response</a>                                                                                                                   | RT |  | 8     | 1.7E-2  | 5.4E-1    |
| <input type="checkbox"/> | GOTERM_BP_ALL  | <a href="#">regulation of phagocytosis</a>                                                                                                                       | RT |  | 6     | 2.0E-2  | 5.8E-1    |
| <input type="checkbox"/> | GOTERM_BP_ALL  | <a href="#">positive regulation of phagocytosis</a>                                                                                                              | RT |  | 6     | 2.0E-2  | 5.8E-1    |
| <input type="checkbox"/> | GOTERM_BP_ALL  | <a href="#">positive regulation of immune effector process</a>                                                                                                   | RT |  | 5     | 2.1E-2  | 5.8E-1    |
| <input type="checkbox"/> | GOTERM_BP_ALL  | <a href="#">regulation of adaptive immune response based on somatic recombination of immune receptors built from immunoglobulin superfamily domains.</a>         | RT |  | 6     | 2.4E-2  | 6.1E-1    |
| <input type="checkbox"/> | GOTERM_BP_ALL  | <a href="#">regulation of adaptive immune response</a>                                                                                                           | RT |  | 6     | 2.4E-2  | 6.1E-1    |
| <input type="checkbox"/> | GOTERM_BP_ALL  | <a href="#">positive regulation of adaptive immune response based on somatic recombination of immune receptors built from immunoglobulin superfamily domains</a> | RT |  | 5     | 3.5E-2  | 6.8E-1    |
| <input type="checkbox"/> | GOTERM_BP_ALL  | <a href="#">positive regulation of adaptive immune response</a>                                                                                                  | RT |  | 5     | 3.5E-2  | 6.8E-1    |
| <input type="checkbox"/> | GOTERM_BP_ALL  | <a href="#">regulation of lymphocyte mediated immunity</a>                                                                                                       | RT |  | 5     | 3.5E-2  | 6.8E-1    |
| <input type="checkbox"/> | GOTERM_BP_ALL  | <a href="#">regulation of leukocyte mediated immunity</a>                                                                                                        | RT |  | 5     | 3.5E-2  | 6.8E-1    |
| <input type="checkbox"/> | GOTERM_BP_ALL  | <a href="#">phagocytosis</a>                                                                                                                                     | RT |  | 8     | 3.6E-2  | 6.9E-1    |
| <input type="checkbox"/> | GOTERM_BP_ALL  | <a href="#">positive regulation of endocytosis</a>                                                                                                               | RT |  | 6     | 6.8E-2  | 8.3E-1    |
| <input type="checkbox"/> | GOTERM_BP_ALL  | <a href="#">positive regulation of lymphocyte mediated immunity</a>                                                                                              | RT |  | 4     | 7.8E-2  | 8.5E-1    |
| <input type="checkbox"/> | GOTERM_BP_ALL  | <a href="#">positive regulation of leukocyte mediated immunity</a>                                                                                               | RT |  | 4     | 7.8E-2  | 8.5E-1    |
| <input type="checkbox"/> | GOTERM_BP_ALL  | <a href="#">regulation of inflammatory response to antigenic stimulus</a>                                                                                        | RT |  | 4     | 9.5E-2  | 8.8E-1    |
| <input type="checkbox"/> | GOTERM_BP_ALL  | <a href="#">regulation of response to stimulus</a>                                                                                                               | RT |  | 8     | 1.1E-1  | 8.9E-1    |
| <input type="checkbox"/> | GOTERM_BP_ALL  | <a href="#">inflammatory response to antigenic stimulus</a>                                                                                                      | RT |  | 4     | 1.3E-1  | 9.2E-1    |
| <input type="checkbox"/> | GOTERM_BP_ALL  | <a href="#">adaptive immune response based on somatic recombination of immune</a>                                                                                | RT |  | 12    | 1.5E-1  | 9.3E-1    |

|                          |                       |                                                                                    |                    |  |       |         |           |
|--------------------------|-----------------------|------------------------------------------------------------------------------------|--------------------|--|-------|---------|-----------|
| <input type="checkbox"/> |                       | <a href="#">receptors built from immunoglobulin superfamily domains</a>            | <a href="#">RT</a> |  | 13    | 1.5E-1  | 9.3E-1    |
| <input type="checkbox"/> | GOTERM_BP_ALL         | <a href="#">adaptive immune response</a>                                           | <a href="#">RT</a> |  | 13    | 1.5E-1  | 9.3E-1    |
| <input type="checkbox"/> | GOTERM_BP_ALL         | <a href="#">regulation of immunoglobulin mediated immune response</a>              | <a href="#">RT</a> |  | 3     | 1.8E-1  | 9.5E-1    |
| <input type="checkbox"/> | GOTERM_BP_ALL         | <a href="#">regulation of B cell mediated immunity</a>                             | <a href="#">RT</a> |  | 3     | 1.8E-1  | 9.5E-1    |
| <input type="checkbox"/> | GOTERM_BP_ALL         | <a href="#">positive regulation of multicellular organismal process</a>            | <a href="#">RT</a> |  | 15    | 2.0E-1  | 9.6E-1    |
| <input type="checkbox"/> | GOTERM_BP_ALL         | <a href="#">positive regulation of inflammatory response to antigenic stimulus</a> | <a href="#">RT</a> |  | 3     | 2.1E-1  | 9.6E-1    |
| <input type="checkbox"/> | GOTERM_BP_ALL         | <a href="#">phagocytosis, recognition</a>                                          | <a href="#">RT</a> |  | 3     | 2.1E-1  | 9.6E-1    |
| <input type="checkbox"/> | GOTERM_BP_ALL         | <a href="#">immune effector process</a>                                            | <a href="#">RT</a> |  | 16    | 2.2E-1  | 9.6E-1    |
| <input type="checkbox"/> | GOTERM_BP_ALL         | <a href="#">regulation of endocytosis</a>                                          | <a href="#">RT</a> |  | 6     | 2.4E-1  | 9.7E-1    |
| <input type="checkbox"/> | GOTERM_BP_ALL         | <a href="#">regulation of hypersensitivity</a>                                     | <a href="#">RT</a> |  | 3     | 2.4E-1  | 9.7E-1    |
| <input type="checkbox"/> | GOTERM_BP_ALL         | <a href="#">regulation of acute inflammatory response to antigenic stimulus</a>    | <a href="#">RT</a> |  | 3     | 2.4E-1  | 9.7E-1    |
| <input type="checkbox"/> | GOTERM_BP_ALL         | <a href="#">regulation of acute inflammatory response</a>                          | <a href="#">RT</a> |  | 3     | 2.4E-1  | 9.7E-1    |
| <input type="checkbox"/> | GOTERM_BP_ALL         | <a href="#">positive regulation of transport</a>                                   | <a href="#">RT</a> |  | 6     | 2.9E-1  | 9.8E-1    |
| <input type="checkbox"/> | GOTERM_BP_ALL         | <a href="#">regulation of immune system process</a>                                | <a href="#">RT</a> |  | 13    | 3.0E-1  | 9.8E-1    |
| <input type="checkbox"/> | GOTERM_BP_ALL         | <a href="#">hypersensitivity</a>                                                   | <a href="#">RT</a> |  | 3     | 3.1E-1  | 9.8E-1    |
| <input type="checkbox"/> | GOTERM_BP_ALL         | <a href="#">acute inflammatory response to antigenic stimulus</a>                  | <a href="#">RT</a> |  | 3     | 3.1E-1  | 9.8E-1    |
| <input type="checkbox"/> | GOTERM_BP_ALL         | <a href="#">lymphocyte mediated immunity</a>                                       | <a href="#">RT</a> |  | 11    | 3.4E-1  | 9.8E-1    |
| <input type="checkbox"/> | GOTERM_BP_ALL         | <a href="#">positive regulation of immune system process</a>                       | <a href="#">RT</a> |  | 11    | 3.7E-1  | 9.9E-1    |
| <input type="checkbox"/> | GOTERM_BP_ALL         | <a href="#">regulation of immune response</a>                                      | <a href="#">RT</a> |  | 12    | 3.9E-1  | 9.9E-1    |
| <input type="checkbox"/> | GOTERM_BP_ALL         | <a href="#">leukocyte mediated immunity</a>                                        | <a href="#">RT</a> |  | 11    | 4.1E-1  | 9.9E-1    |
| <input type="checkbox"/> | GOTERM_BP_ALL         | <a href="#">positive regulation of immune response</a>                             | <a href="#">RT</a> |  | 10    | 4.9E-1  | 1.0E0     |
| <input type="checkbox"/> | GOTERM_BP_ALL         | <a href="#">cell recognition</a>                                                   | <a href="#">RT</a> |  | 5     | 6.0E-1  | 1.0E0     |
| <input type="checkbox"/> | GOTERM_BP_ALL         | <a href="#">immunoglobulin mediated immune response</a>                            | <a href="#">RT</a> |  | 7     | 6.1E-1  | 1.0E0     |
| <input type="checkbox"/> | GOTERM_BP_ALL         | <a href="#">B cell mediated immunity</a>                                           | <a href="#">RT</a> |  | 7     | 6.4E-1  | 1.0E0     |
| <input type="checkbox"/> | GOTERM_BP_ALL         | <a href="#">acute inflammatory response</a>                                        | <a href="#">RT</a> |  | 6     | 8.5E-1  | 1.0E0     |
| <input type="checkbox"/> | GOTERM_BP_ALL         | <a href="#">membrane invagination</a>                                              | <a href="#">RT</a> |  | 13    | 8.6E-1  | 1.0E0     |
| <input type="checkbox"/> | GOTERM_BP_ALL         | <a href="#">endocytosis</a>                                                        | <a href="#">RT</a> |  | 13    | 8.6E-1  | 1.0E0     |
| <input type="checkbox"/> | GOTERM_BP_ALL         | <a href="#">regulation of transport</a>                                            | <a href="#">RT</a> |  | 7     | 9.1E-1  | 1.0E0     |
| <input type="checkbox"/> | GOTERM_BP_ALL         | <a href="#">membrane organization and biogenesis</a>                               | <a href="#">RT</a> |  | 18    | 9.2E-1  | 1.0E0     |
|                          | Annotation Cluster 58 | Enrichment Score: 0.92                                                             | <b>G</b>           |  | Count | P_Value | Benjamini |
| <input type="checkbox"/> | GOTERM_BP_ALL         | <a href="#">growth</a>                                                             | <a href="#">RT</a> |  | 34    | 3.4E-2  | 6.9E-1    |
| <input type="checkbox"/> | GOTERM_BP_ALL         | <a href="#">regulation of growth</a>                                               | <a href="#">RT</a> |  | 21    | 1.3E-1  | 9.2E-1    |
| <input type="checkbox"/> | GOTERM_BP_ALL         | <a href="#">cell growth</a>                                                        | <a href="#">RT</a> |  | 16    | 1.3E-1  | 9.2E-1    |
| <input type="checkbox"/> | GOTERM_BP_ALL         | <a href="#">regulation of cell size</a>                                            | <a href="#">RT</a> |  | 17    | 1.4E-1  | 9.3E-1    |
| <input type="checkbox"/> | GOTERM_BP_ALL         | <a href="#">regulation of cell growth</a>                                          | <a href="#">RT</a> |  | 12    | 2.9E-1  | 9.8E-1    |
|                          | Annotation Cluster 59 | Enrichment Score: 0.91                                                             | <b>G</b>           |  | Count | P_Value | Benjamini |
| <input type="checkbox"/> | INTERPRO              | <a href="#">SH2 motif</a>                                                          | <a href="#">RT</a> |  | 15    | 8.3E-2  | 1.0E0     |
| <input type="checkbox"/> | SP_PIR_KEYWORDS       | <a href="#">sh2 domain</a>                                                         | <a href="#">RT</a> |  | 15    | 8.5E-2  | 7.9E-1    |
| <input type="checkbox"/> | SMART                 | <a href="#">SH2</a>                                                                | <a href="#">RT</a> |  | 15    | 1.6E-1  | 9.0E-1    |
| <input type="checkbox"/> | UP_SEQ_FEATURE        | domain:SH2                                                                         | <a href="#">RT</a> |  | 9     | 2.1E-1  | 1.0E0     |
|                          | Annotation Cluster 60 | Enrichment Score: 0.91                                                             | <b>G</b>           |  | Count | P_Value | Benjamini |
| <input type="checkbox"/> | GOTERM_BP_ALL         | <a href="#">response to other organism</a>                                         | <a href="#">RT</a> |  | 19    | 7.7E-2  | 8.5E-1    |
| <input type="checkbox"/> | GOTERM_BP_ALL         | <a href="#">response to virus</a>                                                  | <a href="#">RT</a> |  | 9     | 9.0E-2  | 8.7E-1    |
| <input type="checkbox"/> | GOTERM_BP_ALL         | <a href="#">multi-organism process</a>                                             | <a href="#">RT</a> |  | 24    | 1.8E-1  | 9.5E-1    |
| <input type="checkbox"/> | GOTERM_BP_ALL         | <a href="#">response to biotic stimulus</a>                                        | <a href="#">RT</a> |  | 25    | 2.0E-1  | 9.6E-1    |
|                          | Annotation Cluster 61 | Enrichment Score: 0.9                                                              | <b>G</b>           |  | Count | P_Value | Benjamini |
| <input type="checkbox"/> | KEGG_PATHWAY          | <a href="#">Prostate cancer</a>                                                    | <a href="#">RT</a> |  | 17    | 6.9E-3  | 3.9E-1    |

|                          |                 |                                                                         |                    |  |    |        |        |
|--------------------------|-----------------|-------------------------------------------------------------------------|--------------------|--|----|--------|--------|
| <input type="checkbox"/> | KEGG_PATHWAY    | <a href="#">Apoptosis</a>                                               | <a href="#">RT</a> |  | 16 | 7.2E-3 | 3.2E-1 |
| <input type="checkbox"/> | KEGG_PATHWAY    | <a href="#">Acute myeloid leukemia</a>                                  | <a href="#">RT</a> |  | 12 | 1.7E-2 | 4.5E-1 |
| <input type="checkbox"/> | KEGG_PATHWAY    | <a href="#">Melanoma</a>                                                | <a href="#">RT</a> |  | 13 | 2.5E-2 | 4.8E-1 |
| <input type="checkbox"/> | KEGG_PATHWAY    | <a href="#">Renal cell carcinoma</a>                                    | <a href="#">RT</a> |  | 13 | 3.0E-2 | 5.1E-1 |
| <input type="checkbox"/> | KEGG_PATHWAY    | <a href="#">Chronic myeloid leukemia</a>                                | <a href="#">RT</a> |  | 13 | 3.9E-2 | 5.6E-1 |
| <input type="checkbox"/> | GOTERM_MF_ALL   | <a href="#">phosphatidylinositol-4,5-bisphosphate 3-kinase activity</a> | <a href="#">RT</a> |  | 3  | 3.9E-2 | 9.4E-1 |
| <input type="checkbox"/> | PIR_SUPERFAMILY | PIRSF000586:phosphatidylinositol 3-kinase                               | <a href="#">RT</a> |  | 3  | 4.1E-2 | 1.0E0  |
| <input type="checkbox"/> | KEGG_PATHWAY    | <a href="#">Toll-like receptor signaling pathway</a>                    | <a href="#">RT</a> |  | 16 | 4.1E-2 | 5.5E-1 |
| <input type="checkbox"/> | KEGG_PATHWAY    | <a href="#">Glioma</a>                                                  | <a href="#">RT</a> |  | 11 | 4.4E-2 | 5.5E-1 |
| <input type="checkbox"/> | GOTERM_MF_ALL   | <a href="#">1-phosphatidylinositol-3-kinase activity</a>                | <a href="#">RT</a> |  | 4  | 4.7E-2 | 9.5E-1 |
| <input type="checkbox"/> | GOTERM_MF_ALL   | <a href="#">phosphoinositide 3-kinase activity</a>                      | <a href="#">RT</a> |  | 4  | 4.7E-2 | 9.5E-1 |
| <input type="checkbox"/> | KEGG_PATHWAY    | <a href="#">Focal adhesion</a>                                          | <a href="#">RT</a> |  | 26 | 4.8E-2 | 5.0E-1 |
| <input type="checkbox"/> | KEGG_PATHWAY    | <a href="#">Non-small cell lung cancer</a>                              | <a href="#">RT</a> |  | 10 | 5.7E-2 | 4.8E-1 |
| <input type="checkbox"/> | GOTERM_CC_ALL   | <a href="#">phosphoinositide 3-kinase complex</a>                       | <a href="#">RT</a> |  | 4  | 5.8E-2 | 8.9E-1 |
| <input type="checkbox"/> | KEGG_PATHWAY    | <a href="#">Small cell lung cancer</a>                                  | <a href="#">RT</a> |  | 14 | 6.9E-2 | 5.3E-1 |
| <input type="checkbox"/> | KEGG_PATHWAY    | <a href="#">B cell receptor signaling pathway</a>                       | <a href="#">RT</a> |  | 11 | 8.0E-2 | 5.5E-1 |
| <input type="checkbox"/> | INTERPRO        | <a href="#">Phosphoinositide 3-kinase, ras-binding</a>                  | <a href="#">RT</a> |  | 3  | 8.7E-2 | 1.0E0  |
| <input type="checkbox"/> | KEGG_PATHWAY    | <a href="#">Endometrial cancer</a>                                      | <a href="#">RT</a> |  | 9  | 9.5E-2 | 6.0E-1 |
| <input type="checkbox"/> | KEGG_PATHWAY    | <a href="#">T cell receptor signaling pathway</a>                       | <a href="#">RT</a> |  | 14 | 1.0E-1 | 6.1E-1 |
| <input type="checkbox"/> | KEGG_PATHWAY    | <a href="#">mTOR signaling pathway</a>                                  | <a href="#">RT</a> |  | 9  | 1.0E-1 | 6.0E-1 |
| <input type="checkbox"/> | SMART           | <a href="#">PI3K_rbd</a>                                                | <a href="#">RT</a> |  | 3  | 1.0E-1 | 8.8E-1 |
| <input type="checkbox"/> | INTERPRO        | <a href="#">Phosphoinositide 3-kinase, C2</a>                           | <a href="#">RT</a> |  | 3  | 1.2E-1 | 1.0E0  |
| <input type="checkbox"/> | SMART           | <a href="#">PI3K_C2</a>                                                 | <a href="#">RT</a> |  | 3  | 1.4E-1 | 8.8E-1 |
| <input type="checkbox"/> | KEGG_PATHWAY    | <a href="#">Phosphatidylinositol signaling system</a>                   | <a href="#">RT</a> |  | 10 | 1.4E-1 | 6.9E-1 |
| <input type="checkbox"/> | INTERPRO        | <a href="#">Phosphoinositide 3-kinase accessory region PIK</a>          | <a href="#">RT</a> |  | 3  | 1.5E-1 | 1.0E0  |
| <input type="checkbox"/> | SMART           | <a href="#">PI3Ka</a>                                                   | <a href="#">RT</a> |  | 3  | 1.7E-1 | 8.9E-1 |
| <input type="checkbox"/> | INTERPRO        | <a href="#">Phosphatidylinositol Kinase</a>                             | <a href="#">RT</a> |  | 3  | 1.8E-1 | 1.0E0  |
| <input type="checkbox"/> | KEGG_PATHWAY    | <a href="#">Pancreatic cancer</a>                                       | <a href="#">RT</a> |  | 10 | 2.1E-1 | 7.7E-1 |
| <input type="checkbox"/> | KEGG_PATHWAY    | <a href="#">Fc epsilon RI signaling pathway</a>                         | <a href="#">RT</a> |  | 10 | 2.2E-1 | 7.7E-1 |
| <input type="checkbox"/> | GOTERM_BP_ALL   | <a href="#">phosphoinositide phosphorylation</a>                        | <a href="#">RT</a> |  | 3  | 2.4E-1 | 9.7E-1 |
| <input type="checkbox"/> | KEGG_PATHWAY    | <a href="#">Type II diabetes mellitus</a>                               | <a href="#">RT</a> |  | 7  | 2.6E-1 | 8.1E-1 |
| <input type="checkbox"/> | GOTERM_BP_ALL   | <a href="#">lipid modification</a>                                      | <a href="#">RT</a> |  | 5  | 2.6E-1 | 9.7E-1 |
| <input type="checkbox"/> | GOTERM_BP_ALL   | <a href="#">glycerophospholipid metabolic process</a>                   | <a href="#">RT</a> |  | 9  | 2.7E-1 | 9.7E-1 |
| <input type="checkbox"/> | GOTERM_BP_ALL   | <a href="#">lipid phosphorylation</a>                                   | <a href="#">RT</a> |  | 3  | 2.8E-1 | 9.7E-1 |
| <input type="checkbox"/> | GOTERM_MF_ALL   | <a href="#">lipid kinase activity</a>                                   | <a href="#">RT</a> |  | 4  | 2.9E-1 | 1.0E0  |
| <input type="checkbox"/> | GOTERM_MF_ALL   | <a href="#">inositol or phosphatidylinositol kinase activity</a>        | <a href="#">RT</a> |  | 5  | 3.1E-1 | 1.0E0  |
| <input type="checkbox"/> | UP_SEQ_FEATURE  | domain:PI3K/PI4K                                                        | <a href="#">RT</a> |  | 3  | 3.2E-1 | 1.0E0  |
| <input type="checkbox"/> | GOTERM_BP_ALL   | <a href="#">phosphoinositide-mediated signaling</a>                     | <a href="#">RT</a> |  | 7  | 3.5E-1 | 9.9E-1 |
| <input type="checkbox"/> | KEGG_PATHWAY    | <a href="#">ErbB signaling pathway</a>                                  | <a href="#">RT</a> |  | 10 | 3.5E-1 | 8.7E-1 |
| <input type="checkbox"/> | INTERPRO        | <a href="#">Phosphatidylinositol 3- and 4-kinase, catalytic</a>         | <a href="#">RT</a> |  | 3  | 4.0E-1 | 1.0E0  |
| <input type="checkbox"/> | KEGG_PATHWAY    | <a href="#">Insulin signaling pathway</a>                               | <a href="#">RT</a> |  | 14 | 4.2E-1 | 8.7E-1 |
| <input type="checkbox"/> | KEGG_PATHWAY    | <a href="#">Inositol phosphate metabolism</a>                           | <a href="#">RT</a> |  | 6  | 4.3E-1 | 8.8E-1 |
| <input type="checkbox"/> | SMART           | <a href="#">PI3Kc</a>                                                   | <a href="#">RT</a> |  | 3  | 4.6E-1 | 9.9E-1 |
| <input type="checkbox"/> | KEGG_PATHWAY    | <a href="#">Colorectal cancer</a>                                       | <a href="#">RT</a> |  | 9  | 4.6E-1 | 8.9E-1 |
| <input type="checkbox"/> | GOTERM_BP_ALL   | <a href="#">phosphoinositide metabolic process</a>                      | <a href="#">RT</a> |  | 6  | 4.7E-1 | 1.0E0  |
| <input type="checkbox"/> | KEGG_PATHWAY    | <a href="#">Natural killer cell mediated cytotoxicity</a>               | <a href="#">RT</a> |  | 13 | 4.8E-1 | 9.0E-1 |
| <input type="checkbox"/> | KEGG_PATHWAY    | <a href="#">VEGF signaling pathway</a>                                  | <a href="#">RT</a> |  | 7  | 7.0E-1 | 9.6E-1 |

| <input type="checkbox"/> |                       |                                                                         |                       |  |          |  |  |       |         |           |
|--------------------------|-----------------------|-------------------------------------------------------------------------|-----------------------|--|----------|--|--|-------|---------|-----------|
| <input type="checkbox"/> | GOTERM_CC_ALL         | <a href="#">cytosolic part</a>                                          | <a href="#">RT</a>    |  |          |  |  | 5     | 9.8E-1  | 1.0E0     |
|                          | Annotation Cluster 62 |                                                                         | Enrichment Score: 0.9 |  | <b>G</b> |  |  | Count | P_Value | Benjamini |
| <input type="checkbox"/> | GOTERM_BP_ALL         | <a href="#">regulation of lymphocyte proliferation</a>                  | <a href="#">RT</a>    |  |          |  |  | 12    | 2.0E-2  | 5.8E-1    |
| <input type="checkbox"/> | GOTERM_BP_ALL         | <a href="#">regulation of mononuclear cell proliferation</a>            | <a href="#">RT</a>    |  |          |  |  | 12    | 2.0E-2  | 5.8E-1    |
| <input type="checkbox"/> | GOTERM_BP_ALL         | <a href="#">regulation of lymphocyte activation</a>                     | <a href="#">RT</a>    |  |          |  |  | 15    | 5.8E-2  | 8.0E-1    |
| <input type="checkbox"/> | GOTERM_BP_ALL         | <a href="#">mononuclear cell proliferation</a>                          | <a href="#">RT</a>    |  |          |  |  | 13    | 7.4E-2  | 8.5E-1    |
| <input type="checkbox"/> | GOTERM_BP_ALL         | <a href="#">lymphocyte proliferation</a>                                | <a href="#">RT</a>    |  |          |  |  | 13    | 7.4E-2  | 8.5E-1    |
| <input type="checkbox"/> | GOTERM_BP_ALL         | <a href="#">negative regulation of B cell proliferation</a>             | <a href="#">RT</a>    |  |          |  |  | 3     | 1.8E-1  | 9.5E-1    |
| <input type="checkbox"/> | GOTERM_BP_ALL         | <a href="#">negative regulation of lymphocyte proliferation</a>         | <a href="#">RT</a>    |  |          |  |  | 5     | 1.8E-1  | 9.5E-1    |
| <input type="checkbox"/> | GOTERM_BP_ALL         | <a href="#">negative regulation of mononuclear cell proliferation</a>   | <a href="#">RT</a>    |  |          |  |  | 5     | 1.8E-1  | 9.5E-1    |
| <input type="checkbox"/> | GOTERM_BP_ALL         | <a href="#">B cell proliferation</a>                                    | <a href="#">RT</a>    |  |          |  |  | 5     | 2.6E-1  | 9.7E-1    |
| <input type="checkbox"/> | GOTERM_BP_ALL         | <a href="#">negative regulation of B cell activation</a>                | <a href="#">RT</a>    |  |          |  |  | 3     | 3.1E-1  | 9.8E-1    |
| <input type="checkbox"/> | GOTERM_BP_ALL         | <a href="#">regulation of B cell proliferation</a>                      | <a href="#">RT</a>    |  |          |  |  | 4     | 3.2E-1  | 9.8E-1    |
| <input type="checkbox"/> | GOTERM_BP_ALL         | <a href="#">regulation of B cell activation</a>                         | <a href="#">RT</a>    |  |          |  |  | 6     | 3.3E-1  | 9.8E-1    |
| <input type="checkbox"/> | GOTERM_BP_ALL         | <a href="#">negative regulation of lymphocyte activation</a>            | <a href="#">RT</a>    |  |          |  |  | 5     | 3.4E-1  | 9.8E-1    |
|                          | Annotation Cluster 63 |                                                                         | Enrichment Score: 0.9 |  | <b>G</b> |  |  | Count | P_Value | Benjamini |
| <input type="checkbox"/> | SP_PIR_KEYWORDS       | <a href="#">autophosphorylation</a>                                     | <a href="#">RT</a>    |  |          |  |  | 11    | 2.6E-3  | 1.7E-1    |
| <input type="checkbox"/> | SP_PIR_KEYWORDS       | <a href="#">ATP</a>                                                     | <a href="#">RT</a>    |  |          |  |  | 21    | 7.2E-2  | 7.5E-1    |
| <input type="checkbox"/> | GOTERM_MF_ALL         | <a href="#">protein-tyrosine kinase activity</a>                        | <a href="#">RT</a>    |  |          |  |  | 35    | 1.1E-1  | 9.9E-1    |
| <input type="checkbox"/> | INTERPRO              | <a href="#">Tyrosine protein kinase, active site</a>                    | <a href="#">RT</a>    |  |          |  |  | 13    | 1.3E-1  | 1.0E0     |
| <input type="checkbox"/> | SP_PIR_KEYWORDS       | <a href="#">phosphotransferase</a>                                      | <a href="#">RT</a>    |  |          |  |  | 16    | 1.5E-1  | 8.8E-1    |
| <input type="checkbox"/> | INTERPRO              | <a href="#">Tyrosine protein kinase</a>                                 | <a href="#">RT</a>    |  |          |  |  | 15    | 1.8E-1  | 1.0E0     |
| <input type="checkbox"/> | SP_PIR_KEYWORDS       | <a href="#">tyrosine-protein kinase</a>                                 | <a href="#">RT</a>    |  |          |  |  | 14    | 1.8E-1  | 9.0E-1    |
| <input type="checkbox"/> | SP_PIR_KEYWORDS       | <a href="#">tyrosine-specific protein kinase</a>                        | <a href="#">RT</a>    |  |          |  |  | 7     | 2.2E-1  | 9.3E-1    |
| <input type="checkbox"/> | UP_SEQ_FEATURE        | domain:Ig-like C2-type 3                                                | <a href="#">RT</a>    |  |          |  |  | 8     | 3.0E-1  | 1.0E0     |
| <input type="checkbox"/> | SMART                 | <a href="#">TyrKc</a>                                                   | <a href="#">RT</a>    |  |          |  |  | 15    | 3.3E-1  | 9.6E-1    |
| <input type="checkbox"/> | GOTERM_MF_ALL         | <a href="#">transmembrane receptor protein tyrosine kinase activity</a> | <a href="#">RT</a>    |  |          |  |  | 8     | 4.5E-1  | 1.0E0     |
|                          | Annotation Cluster 64 |                                                                         | Enrichment Score: 0.9 |  | <b>G</b> |  |  | Count | P_Value | Benjamini |
| <input type="checkbox"/> | GOTERM_BP_ALL         | <a href="#">regulation of odontogenesis of dentine-containing teeth</a> | <a href="#">RT</a>    |  |          |  |  | 4     | 1.0E-2  | 4.5E-1    |
| <input type="checkbox"/> | GOTERM_BP_ALL         | <a href="#">regulation of ossification</a>                              | <a href="#">RT</a>    |  |          |  |  | 8     | 1.2E-2  | 4.7E-1    |
| <input type="checkbox"/> | GOTERM_BP_ALL         | <a href="#">odontogenesis of dentine-containing teeth</a>               | <a href="#">RT</a>    |  |          |  |  | 9     | 1.4E-2  | 5.0E-1    |
| <input type="checkbox"/> | GOTERM_BP_ALL         | <a href="#">positive regulation of bone remodeling</a>                  | <a href="#">RT</a>    |  |          |  |  | 4     | 1.7E-2  | 5.4E-1    |
| <input type="checkbox"/> | GOTERM_BP_ALL         | <a href="#">positive regulation of ossification</a>                     | <a href="#">RT</a>    |  |          |  |  | 4     | 1.7E-2  | 5.4E-1    |
| <input type="checkbox"/> | GOTERM_BP_ALL         | <a href="#">BMP signaling pathway</a>                                   | <a href="#">RT</a>    |  |          |  |  | 8     | 2.0E-2  | 5.8E-1    |
| <input type="checkbox"/> | PIRSF500510           | PIRSF500510:bone morphogenetic protein, BMP2/ BMP4 types                | <a href="#">RT</a>    |  |          |  |  | 3     | 2.2E-2  | 1.0E0     |
| <input type="checkbox"/> | GOTERM_BP_ALL         | <a href="#">cartilage development</a>                                   | <a href="#">RT</a>    |  |          |  |  | 11    | 2.3E-2  | 6.0E-1    |
| <input type="checkbox"/> | GOTERM_BP_ALL         | <a href="#">regulation of bone remodeling</a>                           | <a href="#">RT</a>    |  |          |  |  | 8     | 2.4E-2  | 6.1E-1    |
| <input type="checkbox"/> | GOTERM_BP_ALL         | <a href="#">odontogenesis</a>                                           | <a href="#">RT</a>    |  |          |  |  | 9     | 2.5E-2  | 6.2E-1    |
| <input type="checkbox"/> | GOTERM_BP_ALL         | <a href="#">regulation of osteoblast differentiation</a>                | <a href="#">RT</a>    |  |          |  |  | 5     | 2.7E-2  | 6.4E-1    |
| <input type="checkbox"/> | GOTERM_BP_ALL         | <a href="#">positive regulation of cell differentiation</a>             | <a href="#">RT</a>    |  |          |  |  | 11    | 2.8E-2  | 6.4E-1    |
| <input type="checkbox"/> | GOTERM_BP_ALL         | <a href="#">ossification</a>                                            | <a href="#">RT</a>    |  |          |  |  | 16    | 3.8E-2  | 7.0E-1    |
| <input type="checkbox"/> | GOTERM_BP_ALL         | <a href="#">regulation of odontogenesis</a>                             | <a href="#">RT</a>    |  |          |  |  | 3     | 4.0E-2  | 7.1E-1    |
| <input type="checkbox"/> | GOTERM_BP_ALL         | <a href="#">biomineral formation</a>                                    | <a href="#">RT</a>    |  |          |  |  | 16    | 4.1E-2  | 7.1E-1    |
| <input type="checkbox"/> | GOTERM_BP_ALL         | <a href="#">osteoblast differentiation</a>                              | <a href="#">RT</a>    |  |          |  |  | 7     | 4.6E-2  | 7.5E-1    |
| <input type="checkbox"/> | SP_PIR_KEYWORDS       | <a href="#">osteogenesis</a>                                            | <a href="#">RT</a>    |  |          |  |  | 5     | 5.0E-2  | 6.9E-1    |
| <input type="checkbox"/> | GOTERM_BP_ALL         | <a href="#">positive regulation of bone mineralization</a>              | <a href="#">RT</a>    |  |          |  |  | 3     | 6.2E-2  | 8.1E-1    |
| <input type="checkbox"/> | GOTERM_BP_ALL         | <a href="#">bone mineralization</a>                                     | <a href="#">RT</a>    |  |          |  |  | 7     | 6.8E-2  | 8.3E-1    |

|                          |                 |                                                                         |                    |  |       |         |           |
|--------------------------|-----------------|-------------------------------------------------------------------------|--------------------|--|-------|---------|-----------|
| <input type="checkbox"/> | GOTERM_BP_ALL   | <a href="#">bone remodeling</a>                                         | <a href="#">RT</a> |  | 16    | 6.9E-2  | 8.3E-1    |
| <input type="checkbox"/> | GOTERM_BP_ALL   | <a href="#">ureteric bud branching</a>                                  | <a href="#">RT</a> |  | 5     | 7.5E-2  | 8.5E-1    |
| <input type="checkbox"/> | GOTERM_BP_ALL   | <a href="#">regulation of bone mineralization</a>                       | <a href="#">RT</a> |  | 5     | 8.8E-2  | 8.7E-1    |
| <input type="checkbox"/> | GOTERM_BP_ALL   | <a href="#">urogenital system development</a>                           | <a href="#">RT</a> |  | 12    | 9.3E-2  | 8.7E-1    |
| <input type="checkbox"/> | GOTERM_BP_ALL   | <a href="#">mesoderm formation</a>                                      | <a href="#">RT</a> |  | 6     | 9.9E-2  | 8.9E-1    |
| <input type="checkbox"/> | SP_PIR_KEYWORDS | <a href="#">Chondrogenesis</a>                                          | <a href="#">RT</a> |  | 4     | 1.1E-1  | 8.2E-1    |
| <input type="checkbox"/> | GOTERM_BP_ALL   | <a href="#">kidney development</a>                                      | <a href="#">RT</a> |  | 11    | 1.1E-1  | 9.0E-1    |
| <input type="checkbox"/> | PIR_SUPERFAMILY | PIRSF037272:bone morphogenetic protein                                  | <a href="#">RT</a> |  | 4     | 1.2E-1  | 1.0E0     |
| <input type="checkbox"/> | GOTERM_BP_ALL   | <a href="#">mesoderm morphogenesis</a>                                  | <a href="#">RT</a> |  | 6     | 1.2E-1  | 9.1E-1    |
| <input type="checkbox"/> | GOTERM_BP_ALL   | <a href="#">formation of primary germ layer</a>                         | <a href="#">RT</a> |  | 6     | 1.4E-1  | 9.2E-1    |
| <input type="checkbox"/> | GOTERM_BP_ALL   | <a href="#">positive regulation of developmental process</a>            | <a href="#">RT</a> |  | 12    | 1.4E-1  | 9.3E-1    |
| <input type="checkbox"/> | GOTERM_BP_ALL   | <a href="#">positive regulation of osteoblast differentiation</a>       | <a href="#">RT</a> |  | 3     | 1.8E-1  | 9.5E-1    |
| <input type="checkbox"/> | GOTERM_BP_ALL   | <a href="#">tissue remodeling</a>                                       | <a href="#">RT</a> |  | 16    | 1.9E-1  | 9.5E-1    |
| <input type="checkbox"/> | GOTERM_BP_ALL   | <a href="#">branching morphogenesis of a tube</a>                       | <a href="#">RT</a> |  | 9     | 1.9E-1  | 9.6E-1    |
| <input type="checkbox"/> | GOTERM_BP_ALL   | <a href="#">tube morphogenesis</a>                                      | <a href="#">RT</a> |  | 17    | 2.4E-1  | 9.7E-1    |
| <input type="checkbox"/> | INTERPRO        | <a href="#">Transforming growth factor beta (TGFB), N-terminal</a>      | <a href="#">RT</a> |  | 4     | 2.4E-1  | 1.0E0     |
| <input type="checkbox"/> | GOTERM_BP_ALL   | <a href="#">metanephros development</a>                                 | <a href="#">RT</a> |  | 7     | 2.4E-1  | 9.7E-1    |
| <input type="checkbox"/> | GOTERM_BP_ALL   | <a href="#">morphogenesis of a branching structure</a>                  | <a href="#">RT</a> |  | 9     | 2.5E-1  | 9.7E-1    |
| <input type="checkbox"/> | INTERPRO        | <a href="#">Transforming growth factor-beta-related</a>                 | <a href="#">RT</a> |  | 5     | 2.7E-1  | 1.0E0     |
| <input type="checkbox"/> | GOTERM_BP_ALL   | <a href="#">skeletal development</a>                                    | <a href="#">RT</a> |  | 21    | 2.8E-1  | 9.7E-1    |
| <input type="checkbox"/> | GOTERM_BP_ALL   | <a href="#">mesoderm development</a>                                    | <a href="#">RT</a> |  | 7     | 2.9E-1  | 9.8E-1    |
| <input type="checkbox"/> | KEGG_PATHWAY    | <a href="#">Hedgehog signaling pathway</a>                              | <a href="#">RT</a> |  | 7     | 3.2E-1  | 8.4E-1    |
| <input type="checkbox"/> | INTERPRO        | <a href="#">Transforming growth factor beta</a>                         | <a href="#">RT</a> |  | 5     | 3.5E-1  | 1.0E0     |
| <input type="checkbox"/> | GOTERM_BP_ALL   | <a href="#">negative regulation of bone remodeling</a>                  | <a href="#">RT</a> |  | 3     | 3.8E-1  | 9.9E-1    |
| <input type="checkbox"/> | GOTERM_BP_ALL   | <a href="#">ureteric bud development</a>                                | <a href="#">RT</a> |  | 5     | 4.0E-1  | 9.9E-1    |
| <input type="checkbox"/> | SMART           | <a href="#">TGFB</a>                                                    | <a href="#">RT</a> |  | 5     | 4.7E-1  | 9.9E-1    |
| <input type="checkbox"/> | GOTERM_BP_ALL   | <a href="#">tube development</a>                                        | <a href="#">RT</a> |  | 19    | 5.2E-1  | 1.0E0     |
| <input type="checkbox"/> | GOTERM_BP_ALL   | <a href="#">negative regulation of multicellular organismal process</a> | <a href="#">RT</a> |  | 4     | 6.3E-1  | 1.0E0     |
| <input type="checkbox"/> | GOTERM_MF_ALL   | <a href="#">growth factor activity</a>                                  | <a href="#">RT</a> |  | 14    | 6.9E-1  | 1.0E0     |
| <input type="checkbox"/> | GOTERM_BP_ALL   | <a href="#">tissue development</a>                                      | <a href="#">RT</a> |  | 25    | 7.3E-1  | 1.0E0     |
| <input type="checkbox"/> | SP_PIR_KEYWORDS | <a href="#">growth factor</a>                                           | <a href="#">RT</a> |  | 10    | 7.7E-1  | 1.0E0     |
| <input type="checkbox"/> | GOTERM_BP_ALL   | <a href="#">tissue morphogenesis</a>                                    | <a href="#">RT</a> |  | 6     | 8.2E-1  | 1.0E0     |
| <input type="checkbox"/> | KEGG_PATHWAY    | <a href="#">Basal cell carcinoma</a>                                    | <a href="#">RT</a> |  | 4     | 8.7E-1  | 9.9E-1    |
| <input type="checkbox"/> | GOTERM_BP_ALL   | <a href="#">eye development</a>                                         | <a href="#">RT</a> |  | 6     | 9.5E-1  | 1.0E0     |
| <input type="checkbox"/> | GOTERM_BP_ALL   | <a href="#">cell fate commitment</a>                                    | <a href="#">RT</a> |  | 6     | 9.6E-1  | 1.0E0     |
| <input type="checkbox"/> | GOTERM_BP_ALL   | <a href="#">camera-type eye development</a>                             | <a href="#">RT</a> |  | 3     | 9.9E-1  | 1.0E0     |
| <input type="checkbox"/> | SP_PIR_KEYWORDS | <a href="#">Cleavage on pair of basic residues</a>                      | <a href="#">RT</a> |  | 10    | 9.9E-1  | 1.0E0     |
| Annotation Cluster 65    |                 | Enrichment Score: 0.88                                                  | <b>G</b>           |  | Count | P_Value | Benjamini |
| <input type="checkbox"/> | GOTERM_BP_ALL   | <a href="#">regulation of transferase activity</a>                      | <a href="#">RT</a> |  | 24    | 4.3E-2  | 7.3E-1    |
| <input type="checkbox"/> | GOTERM_BP_ALL   | <a href="#">regulation of kinase activity</a>                           | <a href="#">RT</a> |  | 23    | 5.2E-2  | 7.7E-1    |
| <input type="checkbox"/> | GOTERM_BP_ALL   | <a href="#">regulation of a molecular function</a>                      | <a href="#">RT</a> |  | 46    | 5.8E-2  | 8.0E-1    |
| <input type="checkbox"/> | GOTERM_BP_ALL   | <a href="#">regulation of protein kinase activity</a>                   | <a href="#">RT</a> |  | 22    | 5.9E-2  | 8.0E-1    |
| <input type="checkbox"/> | GOTERM_BP_ALL   | <a href="#">regulation of catalytic activity</a>                        | <a href="#">RT</a> |  | 40    | 8.6E-2  | 8.6E-1    |
| <input type="checkbox"/> | GOTERM_BP_ALL   | <a href="#">positive regulation of transferase activity</a>             | <a href="#">RT</a> |  | 16    | 8.7E-2  | 8.7E-1    |
| <input type="checkbox"/> | GOTERM_BP_ALL   | <a href="#">positive regulation of protein kinase activity</a>          | <a href="#">RT</a> |  | 15    | 9.0E-2  | 8.7E-1    |
| <input type="checkbox"/> | GOTERM_BP_ALL   | <a href="#">positive regulation of kinase activity</a>                  | <a href="#">RT</a> |  | 15    | 1.2E-1  | 9.0E-1    |
| <input type="checkbox"/> | GOTERM_BP_ALL   | <a href="#">positive regulation of catalytic activity</a>               | <a href="#">RT</a> |  | 22    | 1.2E-1  | 9.1E-1    |



|                          |                 |                                                                             |                        |          |     |        |         |           |
|--------------------------|-----------------|-----------------------------------------------------------------------------|------------------------|----------|-----|--------|---------|-----------|
| <input type="checkbox"/> | GOTERM_BP_ALL   | <a href="#">positive regulation of MAP kinase activity</a>                  | <a href="#">RT</a>     |          | 7   | 2.0E-1 | 9.6E-1  |           |
| <input type="checkbox"/> | GOTERM_BP_ALL   | <a href="#">regulation of MAP kinase activity</a>                           | <a href="#">RT</a>     |          | 8   | 4.1E-1 | 9.9E-1  |           |
| <input type="checkbox"/> | GOTERM_BP_ALL   | <a href="#">activation of MAPK activity</a>                                 | <a href="#">RT</a>     |          | 4   | 6.8E-1 | 1.0E0   |           |
| <input type="checkbox"/> | GOTERM_BP_ALL   | <a href="#">MAPKKK cascade</a>                                              | <a href="#">RT</a>     |          | 10  | 8.3E-1 | 1.0E0   |           |
|                          |                 | Annotation Cluster 66                                                       | Enrichment Score: 0.87 | <b>G</b> |     | Count  | P_Value | Benjamini |
| <input type="checkbox"/> | BIOCARTA        | <a href="#">The information-processing pathway at the IFN-beta enhancer</a> | <a href="#">RT</a>     |          | 5   | 3.4E-2 | 9.6E-1  |           |
| <input type="checkbox"/> | BIOCARTA        | <a href="#">Control of Gene Expression by Vitamin D Receptor</a>            | <a href="#">RT</a>     |          | 8   | 4.3E-2 | 9.6E-1  |           |
| <input type="checkbox"/> | GOTERM_BP_ALL   | <a href="#">histone acetylation</a>                                         | <a href="#">RT</a>     |          | 4   | 6.2E-2 | 8.1E-1  |           |
| <input type="checkbox"/> | GOTERM_BP_ALL   | <a href="#">protein amino acid acylation</a>                                | <a href="#">RT</a>     |          | 6   | 6.8E-2 | 8.3E-1  |           |
| <input type="checkbox"/> | SMART           | <a href="#">BROMO</a>                                                       | <a href="#">RT</a>     |          | 8   | 8.0E-2 | 8.7E-1  |           |
| <input type="checkbox"/> | INTERPRO        | <a href="#">Bromodomain</a>                                                 | <a href="#">RT</a>     |          | 7   | 9.3E-2 | 1.0E0   |           |
| <input type="checkbox"/> | GOTERM_MF_ALL   | <a href="#">N-acyltransferase activity</a>                                  | <a href="#">RT</a>     |          | 10  | 9.4E-2 | 9.8E-1  |           |
| <input type="checkbox"/> | GOTERM_MF_ALL   | <a href="#">N-acetyltransferase activity</a>                                | <a href="#">RT</a>     |          | 9   | 9.5E-2 | 9.8E-1  |           |
| <input type="checkbox"/> | KEGG_PATHWAY    | <a href="#">Notch signaling pathway</a>                                     | <a href="#">RT</a>     |          | 8   | 1.0E-1 | 5.9E-1  |           |
| <input type="checkbox"/> | SP_PIR_KEYWORDS | <a href="#">bromodomain</a>                                                 | <a href="#">RT</a>     |          | 6   | 1.0E-1 | 8.1E-1  |           |
| <input type="checkbox"/> | GOTERM_MF_ALL   | <a href="#">acetyltransferase activity</a>                                  | <a href="#">RT</a>     |          | 10  | 1.2E-1 | 9.9E-1  |           |
| <input type="checkbox"/> | GOTERM_BP_ALL   | <a href="#">protein amino acid acetylation</a>                              | <a href="#">RT</a>     |          | 4   | 1.5E-1 | 9.4E-1  |           |
| <input type="checkbox"/> | GOTERM_MF_ALL   | <a href="#">lysine N-acetyltransferase activity</a>                         | <a href="#">RT</a>     |          | 4   | 2.0E-1 | 1.0E0   |           |
| <input type="checkbox"/> | GOTERM_MF_ALL   | <a href="#">histone acetyltransferase activity</a>                          | <a href="#">RT</a>     |          | 4   | 2.0E-1 | 1.0E0   |           |
| <input type="checkbox"/> | GOTERM_CC_ALL   | <a href="#">histone acetyltransferase complex</a>                           | <a href="#">RT</a>     |          | 3   | 2.3E-1 | 9.9E-1  |           |
| <input type="checkbox"/> | BIOCARTA        | <a href="#">Regulation of transcriptional activity by PML</a>               | <a href="#">RT</a>     |          | 4   | 4.4E-1 | 1.0E0   |           |
| <input type="checkbox"/> | GOTERM_CC_ALL   | <a href="#">kinetochore</a>                                                 | <a href="#">RT</a>     |          | 3   | 6.1E-1 | 1.0E0   |           |
| <input type="checkbox"/> | GOTERM_CC_ALL   | <a href="#">chromosome, pericentric region</a>                              | <a href="#">RT</a>     |          | 4   | 9.3E-1 | 1.0E0   |           |
|                          |                 | Annotation Cluster 67                                                       | Enrichment Score: 0.87 | <b>G</b> |     | Count  | P_Value | Benjamini |
| <input type="checkbox"/> | SMART           | <a href="#">CHROMO</a>                                                      | <a href="#">RT</a>     |          | 7   | 4.4E-2 | 8.6E-1  |           |
| <input type="checkbox"/> | INTERPRO        | <a href="#">Chromo</a>                                                      | <a href="#">RT</a>     |          | 6   | 6.7E-2 | 1.0E0   |           |
| <input type="checkbox"/> | GOTERM_MF_ALL   | <a href="#">chromatin binding</a>                                           | <a href="#">RT</a>     |          | 14  | 2.5E-1 | 1.0E0   |           |
| <input type="checkbox"/> | INTERPRO        | <a href="#">SNF2-related</a>                                                | <a href="#">RT</a>     |          | 4   | 4.4E-1 | 1.0E0   |           |
|                          |                 | Annotation Cluster 68                                                       | Enrichment Score: 0.86 | <b>G</b> |     | Count  | P_Value | Benjamini |
| <input type="checkbox"/> | GOTERM_BP_ALL   | <a href="#">cellular developmental process</a>                              | <a href="#">RT</a>     |          | 186 | 1.1E-2 | 4.6E-1  |           |
| <input type="checkbox"/> | GOTERM_BP_ALL   | <a href="#">cell differentiation</a>                                        | <a href="#">RT</a>     |          | 186 | 1.1E-2 | 4.6E-1  |           |
| <input type="checkbox"/> | GOTERM_BP_ALL   | <a href="#">developmental process</a>                                       | <a href="#">RT</a>     |          | 282 | 3.3E-2 | 6.8E-1  |           |
| <input type="checkbox"/> | GOTERM_BP_ALL   | <a href="#">organ development</a>                                           | <a href="#">RT</a>     |          | 131 | 2.3E-1 | 9.6E-1  |           |
| <input type="checkbox"/> | GOTERM_BP_ALL   | <a href="#">system development</a>                                          | <a href="#">RT</a>     |          | 158 | 2.7E-1 | 9.7E-1  |           |
| <input type="checkbox"/> | GOTERM_BP_ALL   | <a href="#">multicellular organismal development</a>                        | <a href="#">RT</a>     |          | 198 | 3.7E-1 | 9.9E-1  |           |
| <input type="checkbox"/> | GOTERM_BP_ALL   | <a href="#">anatomical structure development</a>                            | <a href="#">RT</a>     |          | 179 | 4.5E-1 | 9.9E-1  |           |
| <input type="checkbox"/> | GOTERM_BP_ALL   | <a href="#">anatomical structure morphogenesis</a>                          | <a href="#">RT</a>     |          | 101 | 6.2E-1 | 1.0E0   |           |
| <input type="checkbox"/> | GOTERM_BP_ALL   | <a href="#">multicellular organismal process</a>                            | <a href="#">RT</a>     |          | 244 | 7.0E-1 | 1.0E0   |           |
|                          |                 | Annotation Cluster 69                                                       | Enrichment Score: 0.86 | <b>G</b> |     | Count  | P_Value | Benjamini |
| <input type="checkbox"/> | GOTERM_MF_ALL   | <a href="#">sulfuric ester hydrolase activity</a>                           | <a href="#">RT</a>     |          | 4   | 7.7E-2 | 9.7E-1  |           |
| <input type="checkbox"/> | INTERPRO        | <a href="#">Sulphatase</a>                                                  | <a href="#">RT</a>     |          | 4   | 7.7E-2 | 1.0E0   |           |
| <input type="checkbox"/> | INTERPRO        | <a href="#">Alkaline phosphatase</a>                                        | <a href="#">RT</a>     |          | 5   | 8.6E-2 | 1.0E0   |           |
| <input type="checkbox"/> | SMART           | <a href="#">alkPPc</a>                                                      | <a href="#">RT</a>     |          | 5   | 1.5E-1 | 9.0E-1  |           |
| <input type="checkbox"/> | COG_ONTOLOGY    | <a href="#">Inorganic ion transport and metabolism</a>                      | <a href="#">RT</a>     |          | 8   | 6.9E-1 | 1.0E0   |           |
|                          |                 | Annotation Cluster 70                                                       | Enrichment Score: 0.85 | <b>G</b> |     | Count  | P_Value | Benjamini |
| <input type="checkbox"/> | GOTERM_MF_ALL   | <a href="#">lipid binding</a>                                               | <a href="#">RT</a>     |          | 45  | 6.1E-2 | 9.7E-1  |           |
| <input type="checkbox"/> | GOTERM_MF_ALL   | <a href="#">phospholipid binding</a>                                        | <a href="#">RT</a>     |          | 25  | 1.7E-1 | 1.0E0   |           |
| <input type="checkbox"/> | GOTERM_MF_ALL   | <a href="#">phosphoinositide binding</a>                                    | <a href="#">RT</a>     |          | 19  | 2.7E-1 | 1.0E0   |           |
|                          |                 | Annotation Cluster 71                                                       | Enrichment Score: 0.84 | <b>G</b> |     | Count  | P_Value | Benjamini |

|                          |                 |                                                                                                                              |                    |  |       |         |           |
|--------------------------|-----------------|------------------------------------------------------------------------------------------------------------------------------|--------------------|--|-------|---------|-----------|
| <input type="checkbox"/> | GOTERM_MF_ALL   | <a href="#">N-acyltransferase activity</a>                                                                                   | <a href="#">RT</a> |  | 10    | 9.4E-2  | 9.8E-1    |
| <input type="checkbox"/> | GOTERM_MF_ALL   | <a href="#">N-acetyltransferase activity</a>                                                                                 | <a href="#">RT</a> |  | 9     | 9.5E-2  | 9.8E-1    |
| <input type="checkbox"/> | GOTERM_MF_ALL   | <a href="#">acetyltransferase activity</a>                                                                                   | <a href="#">RT</a> |  | 10    | 1.2E-1  | 9.9E-1    |
| <input type="checkbox"/> | GOTERM_MF_ALL   | <a href="#">acyltransferase activity</a>                                                                                     | <a href="#">RT</a> |  | 20    | 1.6E-1  | 9.9E-1    |
| <input type="checkbox"/> | GOTERM_MF_ALL   | <a href="#">transferase activity, transferring groups other than amino-acyl groups</a>                                       | <a href="#">RT</a> |  | 20    | 1.7E-1  | 1.0E0     |
| <input type="checkbox"/> | SP_PIR_KEYWORDS | <a href="#">acyltransferase</a>                                                                                              | <a href="#">RT</a> |  | 16    | 1.7E-1  | 8.9E-1    |
| <input type="checkbox"/> | GOTERM_MF_ALL   | <a href="#">transferase activity, transferring acyl groups</a>                                                               | <a href="#">RT</a> |  | 20    | 2.3E-1  | 1.0E0     |
| Annotation Cluster 72    |                 | Enrichment Score: 0.81                                                                                                       | <b>G</b>           |  | Count | P_Value | Benjamini |
| <input type="checkbox"/> | INTERPRO        | <a href="#">STAT transcription factor, all-alpha</a>                                                                         | <a href="#">RT</a> |  | 3     | 1.5E-1  | 1.0E0     |
| <input type="checkbox"/> | INTERPRO        | <a href="#">STAT transcription factor, core</a>                                                                              | <a href="#">RT</a> |  | 3     | 1.5E-1  | 1.0E0     |
| <input type="checkbox"/> | INTERPRO        | <a href="#">STAT transcription factor, DNA-binding</a>                                                                       | <a href="#">RT</a> |  | 3     | 1.5E-1  | 1.0E0     |
| <input type="checkbox"/> | INTERPRO        | <a href="#">STAT transcription factor, DNA-binding, subdomain</a>                                                            | <a href="#">RT</a> |  | 3     | 1.5E-1  | 1.0E0     |
| <input type="checkbox"/> | INTERPRO        | <a href="#">STAT transcription factor, protein interaction</a>                                                               | <a href="#">RT</a> |  | 3     | 1.5E-1  | 1.0E0     |
| <input type="checkbox"/> | PIR_SUPERFAMILY | PIRSF015568:signal transducer and transcription activator STAT5A                                                             | <a href="#">RT</a> |  | 3     | 1.5E-1  | 1.0E0     |
| <input type="checkbox"/> | UP_SEQ_FEATURE  | domain:SH2                                                                                                                   | <a href="#">RT</a> |  | 9     | 2.1E-1  | 1.0E0     |
| Annotation Cluster 73    |                 | Enrichment Score: 0.81                                                                                                       | <b>G</b>           |  | Count | P_Value | Benjamini |
| <input type="checkbox"/> | GOTERM_BP_ALL   | <a href="#">lipoprotein biosynthetic process</a>                                                                             | <a href="#">RT</a> |  | 9     | 9.0E-2  | 8.7E-1    |
| <input type="checkbox"/> | GOTERM_BP_ALL   | <a href="#">protein amino acid lipidation</a>                                                                                | <a href="#">RT</a> |  | 8     | 1.5E-1  | 9.3E-1    |
| <input type="checkbox"/> | GOTERM_BP_ALL   | <a href="#">lipoprotein metabolic process</a>                                                                                | <a href="#">RT</a> |  | 9     | 2.9E-1  | 9.8E-1    |
| Annotation Cluster 74    |                 | Enrichment Score: 0.8                                                                                                        | <b>G</b>           |  | Count | P_Value | Benjamini |
| <input type="checkbox"/> | SP_PIR_KEYWORDS | <a href="#">lipid metabolism</a>                                                                                             | <a href="#">RT</a> |  | 14    | 1.1E-1  | 8.2E-1    |
| <input type="checkbox"/> | GOTERM_MF_ALL   | <a href="#">carnitine O-acyltransferase activity</a>                                                                         | <a href="#">RT</a> |  | 3     | 1.2E-1  | 9.9E-1    |
| <input type="checkbox"/> | GOTERM_MF_ALL   | <a href="#">O-acyltransferase activity</a>                                                                                   | <a href="#">RT</a> |  | 6     | 1.3E-1  | 9.9E-1    |
| <input type="checkbox"/> | INTERPRO        | <a href="#">Acyltransferase ChoActase/COT/CPT</a>                                                                            | <a href="#">RT</a> |  | 3     | 1.5E-1  | 1.0E0     |
| <input type="checkbox"/> | SP_PIR_KEYWORDS | <a href="#">Fatty acid metabolism</a>                                                                                        | <a href="#">RT</a> |  | 6     | 3.8E-1  | 9.8E-1    |
| Annotation Cluster 75    |                 | Enrichment Score: 0.8                                                                                                        | <b>G</b>           |  | Count | P_Value | Benjamini |
| <input type="checkbox"/> | SP_PIR_KEYWORDS | <a href="#">Endonuclease</a>                                                                                                 | <a href="#">RT</a> |  | 11    | 9.4E-3  | 3.1E-1    |
| <input type="checkbox"/> | SP_PIR_KEYWORDS | <a href="#">nuclease</a>                                                                                                     | <a href="#">RT</a> |  | 12    | 5.4E-2  | 6.9E-1    |
| <input type="checkbox"/> | GOTERM_MF_ALL   | <a href="#">endonuclease activity, active with either ribo- or deoxyribonucleic acids and producing 3'-phosphomonoesters</a> | <a href="#">RT</a> |  | 5     | 8.6E-2  | 9.8E-1    |
| <input type="checkbox"/> | GOTERM_MF_ALL   | <a href="#">endonuclease activity</a>                                                                                        | <a href="#">RT</a> |  | 12    | 1.2E-1  | 9.9E-1    |
| <input type="checkbox"/> | GOTERM_MF_ALL   | <a href="#">endoribonuclease activity</a>                                                                                    | <a href="#">RT</a> |  | 7     | 1.5E-1  | 9.9E-1    |
| <input type="checkbox"/> | GOTERM_MF_ALL   | <a href="#">pancreatic ribonuclease activity</a>                                                                             | <a href="#">RT</a> |  | 4     | 1.5E-1  | 9.9E-1    |
| <input type="checkbox"/> | INTERPRO        | <a href="#">Pancreatic ribonuclease</a>                                                                                      | <a href="#">RT</a> |  | 4     | 1.5E-1  | 1.0E0     |
| <input type="checkbox"/> | GOTERM_MF_ALL   | <a href="#">ribonuclease activity</a>                                                                                        | <a href="#">RT</a> |  | 9     | 1.6E-1  | 9.9E-1    |
| <input type="checkbox"/> | SMART           | <a href="#">RNAse Pc</a>                                                                                                     | <a href="#">RT</a> |  | 4     | 1.9E-1  | 9.0E-1    |
| <input type="checkbox"/> | GOTERM_MF_ALL   | <a href="#">endoribonuclease activity, producing 3'-phosphomonoesters</a>                                                    | <a href="#">RT</a> |  | 4     | 2.0E-1  | 1.0E0     |
| <input type="checkbox"/> | GOTERM_MF_ALL   | <a href="#">nuclease activity</a>                                                                                            | <a href="#">RT</a> |  | 16    | 2.7E-1  | 1.0E0     |
| <input type="checkbox"/> | UP_SEQ_FEATURE  | region of interest:Substrate binding                                                                                         | <a href="#">RT</a> |  | 5     | 5.5E-1  | 1.0E0     |
| <input type="checkbox"/> | GOTERM_MF_ALL   | <a href="#">endoribonuclease activity, producing 5'-phosphomonoesters</a>                                                    | <a href="#">RT</a> |  | 3     | 6.0E-1  | 1.0E0     |
| <input type="checkbox"/> | GOTERM_MF_ALL   | <a href="#">endonuclease activity, active with either ribo- or deoxyribonucleic acids and producing 5'-phosphomonoesters</a> | <a href="#">RT</a> |  | 3     | 6.4E-1  | 1.0E0     |
| Annotation Cluster 76    |                 | Enrichment Score: 0.8                                                                                                        | <b>G</b>           |  | Count | P_Value | Benjamini |
| <input type="checkbox"/> | GOTERM_BP_ALL   | <a href="#">polyamine catabolic process</a>                                                                                  | <a href="#">RT</a> |  | 4     | 5.6E-3  | 3.5E-1    |
| <input type="checkbox"/> | GOTERM_BP_ALL   | <a href="#">spermine catabolic process</a>                                                                                   | <a href="#">RT</a> |  | 3     | 2.1E-2  | 5.8E-1    |
| <input type="checkbox"/> | GOTERM_BP_ALL   | <a href="#">amino acid derivative catabolic process</a>                                                                      | <a href="#">RT</a> |  | 5     | 5.3E-2  | 7.7E-1    |
| <input type="checkbox"/> | GOTERM_BP_ALL   | <a href="#">spermine metabolic process</a>                                                                                   | <a href="#">RT</a> |  | 3     | 1.2E-1  | 9.0E-1    |
| <input type="checkbox"/> | GOTERM_BP_ALL   | <a href="#">biogenic amine catabolic process</a>                                                                             | <a href="#">RT</a> |  | 4     | 1.3E-1  | 9.2E-1    |

|                          |                 |                                                                           |                    |  |       |         |           |
|--------------------------|-----------------|---------------------------------------------------------------------------|--------------------|--|-------|---------|-----------|
| <input type="checkbox"/> | GOTERM_BP_ALL   | <a href="#">polyamine metabolic process</a>                               | <a href="#">RT</a> |  | 4     | 1.8E-1  | 9.5E-1    |
| <input type="checkbox"/> | KEGG_PATHWAY    | <a href="#">Urea cycle and metabolism of amino groups</a>                 | <a href="#">RT</a> |  | 5     | 2.9E-1  | 8.3E-1    |
| <input type="checkbox"/> | GOTERM_BP_ALL   | <a href="#">amine catabolic process</a>                                   | <a href="#">RT</a> |  | 6     | 6.3E-1  | 1.0E0     |
| <input type="checkbox"/> | GOTERM_BP_ALL   | <a href="#">nitrogen compound catabolic process</a>                       | <a href="#">RT</a> |  | 6     | 6.3E-1  | 1.0E0     |
| <input type="checkbox"/> | GOTERM_BP_ALL   | <a href="#">biogenic amine metabolic process</a>                          | <a href="#">RT</a> |  | 5     | 9.1E-1  | 1.0E0     |
| <input type="checkbox"/> | GOTERM_BP_ALL   | <a href="#">amino acid derivative metabolic process</a>                   | <a href="#">RT</a> |  | 6     | 9.1E-1  | 1.0E0     |
| Annotation Cluster 77    |                 | Enrichment Score: 0.79                                                    | <b>G</b>           |  | Count | P_Value | Benjamini |
| <input type="checkbox"/> | GOTERM_BP_ALL   | <a href="#">peptidyl-tyrosine phosphorylation</a>                         | <a href="#">RT</a> |  | 10    | 1.1E-1  | 9.0E-1    |
| <input type="checkbox"/> | GOTERM_BP_ALL   | <a href="#">peptidyl-tyrosine modification</a>                            | <a href="#">RT</a> |  | 10    | 1.1E-1  | 9.0E-1    |
| <input type="checkbox"/> | GOTERM_BP_ALL   | <a href="#">regulation of phosphorylation</a>                             | <a href="#">RT</a> |  | 10    | 1.4E-1  | 9.2E-1    |
| <input type="checkbox"/> | GOTERM_BP_ALL   | <a href="#">regulation of protein amino acid phosphorylation</a>          | <a href="#">RT</a> |  | 9     | 1.4E-1  | 9.3E-1    |
| <input type="checkbox"/> | GOTERM_BP_ALL   | <a href="#">regulation of amine metabolic process</a>                     | <a href="#">RT</a> |  | 9     | 1.5E-1  | 9.3E-1    |
| <input type="checkbox"/> | GOTERM_BP_ALL   | <a href="#">regulation of amino acid metabolic process</a>                | <a href="#">RT</a> |  | 9     | 1.5E-1  | 9.3E-1    |
| <input type="checkbox"/> | GOTERM_BP_ALL   | <a href="#">positive regulation of protein amino acid phosphorylation</a> | <a href="#">RT</a> |  | 6     | 1.6E-1  | 9.5E-1    |
| <input type="checkbox"/> | GOTERM_BP_ALL   | <a href="#">positive regulation of amino acid metabolic process</a>       | <a href="#">RT</a> |  | 6     | 1.6E-1  | 9.5E-1    |
| <input type="checkbox"/> | GOTERM_BP_ALL   | <a href="#">positive regulation of amine metabolic process</a>            | <a href="#">RT</a> |  | 6     | 1.6E-1  | 9.5E-1    |
| <input type="checkbox"/> | GOTERM_BP_ALL   | <a href="#">regulation of phosphorus metabolic process</a>                | <a href="#">RT</a> |  | 10    | 1.7E-1  | 9.4E-1    |
| <input type="checkbox"/> | GOTERM_BP_ALL   | <a href="#">regulation of phosphate metabolic process</a>                 | <a href="#">RT</a> |  | 10    | 1.7E-1  | 9.4E-1    |
| <input type="checkbox"/> | GOTERM_BP_ALL   | <a href="#">peptidyl-amino acid modification</a>                          | <a href="#">RT</a> |  | 15    | 1.7E-1  | 9.4E-1    |
| <input type="checkbox"/> | GOTERM_BP_ALL   | <a href="#">regulation of peptidyl-tyrosine phosphorylation</a>           | <a href="#">RT</a> |  | 5     | 4.8E-1  | 1.0E0     |
| Annotation Cluster 78    |                 | Enrichment Score: 0.78                                                    | <b>G</b>           |  | Count | P_Value | Benjamini |
| <input type="checkbox"/> | GOTERM_MF_ALL   | <a href="#">transferase activity, transferring glycosyl groups</a>        | <a href="#">RT</a> |  | 32    | 1.0E-2  | 7.6E-1    |
| <input type="checkbox"/> | SP_PIR_KEYWORDS | <a href="#">glycosyltransferase</a>                                       | <a href="#">RT</a> |  | 24    | 3.4E-2  | 5.8E-1    |
| <input type="checkbox"/> | GOTERM_CC_ALL   | <a href="#">integral to Golgi membrane</a>                                | <a href="#">RT</a> |  | 7     | 4.1E-2  | 8.0E-1    |
| <input type="checkbox"/> | KEGG_PATHWAY    | <a href="#">Glycan structures - biosynthesis 2</a>                        | <a href="#">RT</a> |  | 10    | 5.7E-2  | 4.8E-1    |
| <input type="checkbox"/> | GOTERM_CC_ALL   | <a href="#">intrinsic to Golgi membrane</a>                               | <a href="#">RT</a> |  | 7     | 8.5E-2  | 9.4E-1    |
| <input type="checkbox"/> | GOTERM_MF_ALL   | <a href="#">sialyltransferase activity</a>                                | <a href="#">RT</a> |  | 5     | 8.6E-2  | 9.8E-1    |
| <input type="checkbox"/> | INTERPRO        | <a href="#">Glycosyl transferase, family 29</a>                           | <a href="#">RT</a> |  | 5     | 8.6E-2  | 1.0E0     |
| <input type="checkbox"/> | SP_PIR_KEYWORDS | <a href="#">signal-anchor</a>                                             | <a href="#">RT</a> |  | 37    | 9.6E-2  | 8.0E-1    |
| <input type="checkbox"/> | GOTERM_BP_ALL   | <a href="#">glycoprotein metabolic process</a>                            | <a href="#">RT</a> |  | 15    | 1.3E-1  | 9.2E-1    |
| <input type="checkbox"/> | INTERPRO        | <a href="#">Sialyltransferase</a>                                         | <a href="#">RT</a> |  | 4     | 1.3E-1  | 1.0E0     |
| <input type="checkbox"/> | GOTERM_BP_ALL   | <a href="#">protein amino acid O-linked glycosylation</a>                 | <a href="#">RT</a> |  | 4     | 1.8E-1  | 9.5E-1    |
| <input type="checkbox"/> | PIR_SUPERFAMILY | PIRSF005557:sialyltransferase                                             | <a href="#">RT</a> |  | 4     | 1.8E-1  | 1.0E0     |
| <input type="checkbox"/> | GOTERM_BP_ALL   | <a href="#">glycoprotein biosynthetic process</a>                         | <a href="#">RT</a> |  | 12    | 1.9E-1  | 9.6E-1    |
| <input type="checkbox"/> | GOTERM_BP_ALL   | <a href="#">protein amino acid glycosylation</a>                          | <a href="#">RT</a> |  | 11    | 1.9E-1  | 9.6E-1    |
| <input type="checkbox"/> | GOTERM_BP_ALL   | <a href="#">biopolymer glycosylation</a>                                  | <a href="#">RT</a> |  | 11    | 2.3E-1  | 9.6E-1    |
| <input type="checkbox"/> | GOTERM_CC_ALL   | <a href="#">intrinsic to organelle membrane</a>                           | <a href="#">RT</a> |  | 10    | 2.8E-1  | 1.0E0     |
| <input type="checkbox"/> | GOTERM_CC_ALL   | <a href="#">integral to organelle membrane</a>                            | <a href="#">RT</a> |  | 9     | 3.0E-1  | 9.9E-1    |
| <input type="checkbox"/> | GOTERM_MF_ALL   | <a href="#">UDP-glycosyltransferase activity</a>                          | <a href="#">RT</a> |  | 11    | 3.2E-1  | 1.0E0     |
| <input type="checkbox"/> | GOTERM_MF_ALL   | <a href="#">transferase activity, transferring hexosyl groups</a>         | <a href="#">RT</a> |  | 16    | 3.3E-1  | 1.0E0     |
| <input type="checkbox"/> | KEGG_PATHWAY    | <a href="#">Glycosphingolipid biosynthesis - ganglioseries</a>            | <a href="#">RT</a> |  | 3     | 4.1E-1  | 8.7E-1    |
| <input type="checkbox"/> | UP_SEQ_FEATURE  | topological domain:Luminal                                                | <a href="#">RT</a> |  | 23    | 5.0E-1  | 1.0E0     |
| <input type="checkbox"/> | GOTERM_CC_ALL   | <a href="#">Golgi membrane</a>                                            | <a href="#">RT</a> |  | 10    | 5.1E-1  | 1.0E0     |
| <input type="checkbox"/> | GOTERM_CC_ALL   | <a href="#">Golgi apparatus part</a>                                      | <a href="#">RT</a> |  | 13    | 7.9E-1  | 1.0E0     |
| <input type="checkbox"/> | GOTERM_CC_ALL   | <a href="#">endomembrane system</a>                                       | <a href="#">RT</a> |  | 28    | 8.9E-1  | 1.0E0     |

| Annotation Cluster 79    |                 | Enrichment Score: 0.78                                 | <b>G</b>           |    | Count | P_Value | Benjamini |
|--------------------------|-----------------|--------------------------------------------------------|--------------------|---------------------------------------------------------------------------------------|-------|---------|-----------|
| <input type="checkbox"/> | UP_SEQ_FEATURE  | domain:ELM2                                            | <a href="#">RT</a> |      | 3     | 9.2E-2  | 1.0E0     |
| <input type="checkbox"/> | UP_SEQ_FEATURE  | domain:SANT                                            | <a href="#">RT</a> |      | 3     | 1.8E-1  | 1.0E0     |
| <input type="checkbox"/> | INTERPRO        | <a href="#">ELM2</a>                                   | <a href="#">RT</a> |      | 3     | 2.8E-1  | 1.0E0     |
| Annotation Cluster 80    |                 | Enrichment Score: 0.76                                 | <b>G</b>           |    | Count | P_Value | Benjamini |
| <input type="checkbox"/> | INTERPRO        | <a href="#">Caspase Recruitment</a>                    | <a href="#">RT</a> |      | 5     | 1.0E-1  | 1.0E0     |
| <input type="checkbox"/> | SMART           | <a href="#">CARD</a>                                   | <a href="#">RT</a> |      | 5     | 1.3E-1  | 8.8E-1    |
| <input type="checkbox"/> | UP_SEQ_FEATURE  | domain:CARD                                            | <a href="#">RT</a> |      | 3     | 3.9E-1  | 1.0E0     |
| Annotation Cluster 81    |                 | Enrichment Score: 0.76                                 | <b>G</b>           |    | Count | P_Value | Benjamini |
| <input type="checkbox"/> | INTERPRO        | <a href="#">SANT, DNA-binding</a>                      | <a href="#">RT</a> |      | 9     | 1.0E-1  | 1.0E0     |
| <input type="checkbox"/> | SMART           | <a href="#">SANT</a>                                   | <a href="#">RT</a> |      | 9     | 1.6E-1  | 9.1E-1    |
| <input type="checkbox"/> | INTERPRO        | <a href="#">Myb, DNA-binding</a>                       | <a href="#">RT</a> |      | 5     | 3.1E-1  | 1.0E0     |
| Annotation Cluster 82    |                 | Enrichment Score: 0.76                                 | <b>G</b>           |    | Count | P_Value | Benjamini |
| <input type="checkbox"/> | INTERPRO        | <a href="#">uDENN</a>                                  | <a href="#">RT</a> |      | 3     | 1.5E-1  | 1.0E0     |
| <input type="checkbox"/> | SMART           | <a href="#">uDENN</a>                                  | <a href="#">RT</a> |      | 3     | 1.7E-1  | 8.9E-1    |
| <input type="checkbox"/> | SMART           | <a href="#">DENN</a>                                   | <a href="#">RT</a> |      | 3     | 2.1E-1  | 9.2E-1    |
| Annotation Cluster 83    |                 | Enrichment Score: 0.76                                 | <b>G</b>           |    | Count | P_Value | Benjamini |
| <input type="checkbox"/> | INTERPRO        | <a href="#">BTB/POZ</a>                                | <a href="#">RT</a> |      | 15    | 4.0E-2  | 1.0E0     |
| <input type="checkbox"/> | INTERPRO        | <a href="#">Kelch related</a>                          | <a href="#">RT</a> |      | 9     | 6.7E-2  | 1.0E0     |
| <input type="checkbox"/> | INTERPRO        | <a href="#">BTB/POZ-like</a>                           | <a href="#">RT</a> |      | 16    | 2.1E-1  | 1.0E0     |
| <input type="checkbox"/> | INTERPRO        | <a href="#">BTB/POZ fold</a>                           | <a href="#">RT</a> |      | 16    | 2.2E-1  | 1.0E0     |
| <input type="checkbox"/> | UP_SEQ_FEATURE  | domain:BTB                                             | <a href="#">RT</a> |      | 7     | 2.9E-1  | 1.0E0     |
| <input type="checkbox"/> | SMART           | <a href="#">BTB</a>                                    | <a href="#">RT</a> |      | 17    | 3.1E-1  | 9.6E-1    |
| <input type="checkbox"/> | INTERPRO        | <a href="#">BTB/Kelch-associated</a>                   | <a href="#">RT</a> |      | 5     | 4.3E-1  | 1.0E0     |
| Annotation Cluster 84    |                 | Enrichment Score: 0.74                                 | <b>G</b>           |   | Count | P_Value | Benjamini |
| <input type="checkbox"/> | INTERPRO        | <a href="#">MAD homology 2, Dwarfism-type</a>          | <a href="#">RT</a> |    | 4     | 1.3E-1  | 1.0E0     |
| <input type="checkbox"/> | INTERPRO        | <a href="#">MAD homology, MH1</a>                      | <a href="#">RT</a> |    | 3     | 1.5E-1  | 1.0E0     |
| <input type="checkbox"/> | INTERPRO        | <a href="#">Dwarfism</a>                               | <a href="#">RT</a> |    | 3     | 1.5E-1  | 1.0E0     |
| <input type="checkbox"/> | PIR_SUPERFAMILY | PIRSF037286:Smad protein                               | <a href="#">RT</a> |    | 3     | 1.5E-1  | 1.0E0     |
| <input type="checkbox"/> | UP_SEQ_FEATURE  | domain:MH1                                             | <a href="#">RT</a> |    | 3     | 1.5E-1  | 1.0E0     |
| <input type="checkbox"/> | UP_SEQ_FEATURE  | domain:MH2                                             | <a href="#">RT</a> |    | 3     | 1.5E-1  | 1.0E0     |
| <input type="checkbox"/> | SMART           | <a href="#">DWB</a>                                    | <a href="#">RT</a> |    | 4     | 1.6E-1  | 9.1E-1    |
| <input type="checkbox"/> | BIOCARTA        | <a href="#">CTCF</a>                                   | <a href="#">RT</a> |    | 5     | 2.2E-1  | 1.0E0     |
| <input type="checkbox"/> | INTERPRO        | <a href="#">MAD homology 1, Dwarfism-type</a>          | <a href="#">RT</a> |    | 3     | 3.1E-1  | 1.0E0     |
| <input type="checkbox"/> | SMART           | <a href="#">DWA</a>                                    | <a href="#">RT</a> |    | 3     | 3.5E-1  | 9.7E-1    |
| Annotation Cluster 85    |                 | Enrichment Score: 0.73                                 | <b>G</b>           |  | Count | P_Value | Benjamini |
| <input type="checkbox"/> | PIR_SUPERFAMILY | PIRSF002549:transferrin                                | <a href="#">RT</a> |    | 3     | 6.4E-2  | 1.0E0     |
| <input type="checkbox"/> | SP_PIR_KEYWORDS | <a href="#">Iron transport</a>                         | <a href="#">RT</a> |    | 5     | 8.3E-2  | 7.8E-1    |
| <input type="checkbox"/> | INTERPRO        | <a href="#">Peptidase S60, transferrin lactoferrin</a> | <a href="#">RT</a> |    | 3     | 8.7E-2  | 1.0E0     |
| <input type="checkbox"/> | SMART           | <a href="#">TR_FER</a>                                 | <a href="#">RT</a> |    | 3     | 1.0E-1  | 8.8E-1    |
| <input type="checkbox"/> | GOTERM_BP_ALL   | <a href="#">iron ion transport</a>                     | <a href="#">RT</a> |    | 5     | 2.4E-1  | 9.7E-1    |
| <input type="checkbox"/> | GOTERM_BP_ALL   | <a href="#">cellular iron ion homeostasis</a>          | <a href="#">RT</a> |    | 4     | 3.4E-1  | 9.8E-1    |
| <input type="checkbox"/> | GOTERM_BP_ALL   | <a href="#">iron ion homeostasis</a>                   | <a href="#">RT</a> |    | 4     | 3.4E-1  | 9.8E-1    |
| <input type="checkbox"/> | GOTERM_MF_ALL   | <a href="#">ferric iron binding</a>                    | <a href="#">RT</a> |    | 3     | 3.7E-1  | 1.0E0     |
| <input type="checkbox"/> | GOTERM_BP_ALL   | <a href="#">transition metal ion transport</a>         | <a href="#">RT</a> |    | 6     | 5.7E-1  | 1.0E0     |
| Annotation Cluster 86    |                 | Enrichment Score: 0.73                                 | <b>G</b>           |  | Count | P_Value | Benjamini |
| <input type="checkbox"/> | SP_PIR_KEYWORDS | <a href="#">chemotaxis</a>                             | <a href="#">RT</a> |    | 11    | 2.3E-2  | 4.8E-1    |
| <input type="checkbox"/> | PIR_SUPERFAMILY | PIRSF001950:small inducible chemokine, C/CC types      | <a href="#">RT</a> |    | 5     | 1.1E-1  | 1.0E0     |
| <input type="checkbox"/> | INTERPRO        | <a href="#">Small chemokine, C-C</a>                   | <a href="#">RT</a> |    | 5     | 1.3E-1  | 1.0E0     |
| <input type="checkbox"/> | INTERPRO        | <a href="#">Small chemokine, interleukin-8-like</a>    | <a href="#">RT</a> |    | 6     | 2.6E-1  | 1.0E0     |

|                          |                       |                                                                              |    |  |       |         |           |
|--------------------------|-----------------------|------------------------------------------------------------------------------|----|--|-------|---------|-----------|
| <input type="checkbox"/> | GOTERM_MF_ALL         | <a href="#">chemokine activity</a>                                           | RT |  | 6     | 2.9E-1  | 1.0E0     |
| <input type="checkbox"/> | GOTERM_MF_ALL         | <a href="#">chemokine receptor binding</a>                                   | RT |  | 6     | 3.1E-1  | 1.0E0     |
| <input type="checkbox"/> | SMART                 | <a href="#">SCY</a>                                                          | RT |  | 6     | 3.3E-1  | 9.6E-1    |
| <input type="checkbox"/> | GOTERM_MF_ALL         | <a href="#">G-protein-coupled receptor binding</a>                           | RT |  | 6     | 6.8E-1  | 1.0E0     |
|                          | Annotation Cluster 87 | Enrichment Score: 0.72                                                       | G  |  | Count | P_Value | Benjamini |
| <input type="checkbox"/> | GOTERM_BP_ALL         | <a href="#">retinal homeostasis</a>                                          | RT |  | 3     | 4.0E-2  | 7.1E-1    |
| <input type="checkbox"/> | GOTERM_BP_ALL         | <a href="#">multicellular organismal homeostasis</a>                         | RT |  | 4     | 4.2E-1  | 9.9E-1    |
| <input type="checkbox"/> | GOTERM_BP_ALL         | <a href="#">tissue homeostasis</a>                                           | RT |  | 4     | 4.2E-1  | 9.9E-1    |
|                          | Annotation Cluster 88 | Enrichment Score: 0.72                                                       | G  |  | Count | P_Value | Benjamini |
| <input type="checkbox"/> | INTERPRO              | <a href="#">Acyl-CoA dehydrogenase/oxidase, N-terminal</a>                   | RT |  | 4     | 1.1E-1  | 1.0E0     |
| <input type="checkbox"/> | INTERPRO              | <a href="#">Acyl-CoA oxidase/dehydrogenase, type 1</a>                       | RT |  | 4     | 1.1E-1  | 1.0E0     |
| <input type="checkbox"/> | INTERPRO              | <a href="#">Acyl-CoA dehydrogenase/oxidase, central region</a>               | RT |  | 4     | 1.3E-1  | 1.0E0     |
| <input type="checkbox"/> | INTERPRO              | <a href="#">Acyl-CoA oxidase/dehydrogenase, type1/2, C-terminal</a>          | RT |  | 4     | 1.3E-1  | 1.0E0     |
| <input type="checkbox"/> | GOTERM_MF_ALL         | <a href="#">acyl-CoA dehydrogenase activity</a>                              | RT |  | 4     | 1.7E-1  | 1.0E0     |
| <input type="checkbox"/> | INTERPRO              | <a href="#">Acyl-CoA dehydrogenase</a>                                       | RT |  | 3     | 2.1E-1  | 1.0E0     |
| <input type="checkbox"/> | GOTERM_MF_ALL         | <a href="#">FAD binding</a>                                                  | RT |  | 7     | 4.4E-1  | 1.0E0     |
| <input type="checkbox"/> | GOTERM_MF_ALL         | <a href="#">oxidoreductase activity, acting on the CH-CH group of donors</a> | RT |  | 5     | 4.9E-1  | 1.0E0     |
|                          | Annotation Cluster 89 | Enrichment Score: 0.71                                                       | G  |  | Count | P_Value | Benjamini |
| <input type="checkbox"/> | PIR_SUPERFAMILY       | PIRSF002512:integrin, beta subunit                                           | RT |  | 4     | 1.8E-2  | 1.0E0     |
| <input type="checkbox"/> | INTERPRO              | <a href="#">Integrin beta subunit, subgroup</a>                              | RT |  | 4     | 2.5E-2  | 1.0E0     |
| <input type="checkbox"/> | INTERPRO              | <a href="#">Integrin beta subunit, N-terminal</a>                            | RT |  | 4     | 3.6E-2  | 1.0E0     |
| <input type="checkbox"/> | INTERPRO              | <a href="#">Integrin beta subunit, tail</a>                                  | RT |  | 4     | 3.6E-2  | 1.0E0     |
| <input type="checkbox"/> | INTERPRO              | <a href="#">Integrin beta subunit</a>                                        | RT |  | 4     | 4.8E-2  | 1.0E0     |
| <input type="checkbox"/> | INTERPRO              | <a href="#">Integrin beta subunit, C-terminal</a>                            | RT |  | 4     | 4.8E-2  | 1.0E0     |
| <input type="checkbox"/> | SMART                 | <a href="#">INB</a>                                                          | RT |  | 4     | 6.2E-2  | 8.8E-1    |
| <input type="checkbox"/> | INTERPRO              | <a href="#">Integrin beta subunit, cytoplasmic</a>                           | RT |  | 3     | 1.2E-1  | 1.0E0     |
| <input type="checkbox"/> | INTERPRO              | <a href="#">Plexin/semaphorin/integrin</a>                                   | RT |  | 7     | 2.1E-1  | 1.0E0     |
| <input type="checkbox"/> | SMART                 | <a href="#">PSI</a>                                                          | RT |  | 7     | 2.9E-1  | 9.6E-1    |
| <input type="checkbox"/> | KEGG_PATHWAY          | <a href="#">ECM-receptor interaction</a>                                     | RT |  | 10    | 3.9E-1  | 8.8E-1    |
| <input type="checkbox"/> | GOTERM_CC_ALL         | <a href="#">integrin complex</a>                                             | RT |  | 4     | 5.5E-1  | 1.0E0     |
| <input type="checkbox"/> | UP_SEQ_FEATURE        | domain:VWFA                                                                  | RT |  | 3     | 7.2E-1  | 1.0E0     |
| <input type="checkbox"/> | GOTERM_BP_ALL         | <a href="#">integrin-mediated signaling pathway</a>                          | RT |  | 7     | 7.5E-1  | 1.0E0     |
| <input type="checkbox"/> | INTERPRO              | <a href="#">von Willebrand factor, type A</a>                                | RT |  | 6     | 8.0E-1  | 1.0E0     |
| <input type="checkbox"/> | SP_PIR_KEYWORDS       | <a href="#">Integrin</a>                                                     | RT |  | 5     | 8.0E-1  | 1.0E0     |
| <input type="checkbox"/> | INTERPRO              | <a href="#">EGF, extracellular</a>                                           | RT |  | 5     | 8.5E-1  | 1.0E0     |
| <input type="checkbox"/> | SMART                 | <a href="#">VWA</a>                                                          | RT |  | 6     | 8.9E-1  | 1.0E0     |
| <input type="checkbox"/> | GOTERM_CC_ALL         | <a href="#">receptor complex</a>                                             | RT |  | 5     | 9.2E-1  | 1.0E0     |
|                          | Annotation Cluster 90 | Enrichment Score: 0.71                                                       | G  |  | Count | P_Value | Benjamini |
| <input type="checkbox"/> | PIR_SUPERFAMILY       | PIRSF038354:forkhead box O protein                                           | RT |  | 3     | 2.2E-2  | 1.0E0     |
| <input type="checkbox"/> | BIOCARTA              | <a href="#">AKT Signaling Pathway</a>                                        | RT |  | 7     | 2.6E-2  | 9.8E-1    |
| <input type="checkbox"/> | INTERPRO              | <a href="#">Fork head transcription factor</a>                               | RT |  | 5     | 4.3E-1  | 1.0E0     |
| <input type="checkbox"/> | SMART                 | <a href="#">FH</a>                                                           | RT |  | 5     | 5.1E-1  | 9.9E-1    |
| <input type="checkbox"/> | INTERPRO              | <a href="#">Winged helix repressor DNA-binding</a>                           | RT |  | 10    | 5.9E-1  | 1.0E0     |
| <input type="checkbox"/> | UP_SEQ_FEATURE        | DNA-binding region:Fork-head                                                 | RT |  | 3     | 7.4E-1  | 1.0E0     |
|                          | Annotation Cluster 91 | Enrichment Score: 0.71                                                       | G  |  | Count | P_Value | Benjamini |
| <input type="checkbox"/> | INTERPRO              | <a href="#">Nuclear receptor ROR</a>                                         | RT |  | 4     | 1.0E-2  | 9.8E-1    |
| <input type="checkbox"/> | SP_PIR_KEYWORDS       | <a href="#">transcription factor</a>                                         | RT |  | 9     | 5.7E-2  | 7.0E-1    |
| <input type="checkbox"/> | GOTERM_BP_ALL         | <a href="#">myeloid leukocyte activation</a>                                 | RT |  | 7     | 6.0E-2  | 8.0E-1    |

|                          |                 |                                                                          |                    |                                                                                     |       |         |           |
|--------------------------|-----------------|--------------------------------------------------------------------------|--------------------|-------------------------------------------------------------------------------------|-------|---------|-----------|
| <input type="checkbox"/> | GOTERM_BP_ALL   | <a href="#">regulation of macrophage activation</a>                      | <a href="#">RT</a> |                                                                                     | 3     | 8.8E-2  | 8.6E-1    |
| <input type="checkbox"/> | GOTERM_BP_ALL   | <a href="#">cerebellar Purkinje cell layer development</a>               | <a href="#">RT</a> |                                                                                     | 4     | 1.1E-1  | 9.0E-1    |
| <input type="checkbox"/> | GOTERM_BP_ALL   | <a href="#">cGMP metabolic process</a>                                   | <a href="#">RT</a> |                                                                                     | 4     | 1.3E-1  | 9.2E-1    |
| <input type="checkbox"/> | GOTERM_BP_ALL   | <a href="#">cerebellar cortex development</a>                            | <a href="#">RT</a> |                                                                                     | 4     | 2.0E-1  | 9.6E-1    |
| <input type="checkbox"/> | GOTERM_BP_ALL   | <a href="#">cyclic nucleotide metabolic process</a>                      | <a href="#">RT</a> |                                                                                     | 6     | 2.1E-1  | 9.6E-1    |
| <input type="checkbox"/> | GOTERM_BP_ALL   | <a href="#">macrophage activation</a>                                    | <a href="#">RT</a> |                                                                                     | 3     | 2.1E-1  | 9.6E-1    |
| <input type="checkbox"/> | GOTERM_BP_ALL   | <a href="#">cerebellar Purkinje cell layer formation</a>                 | <a href="#">RT</a> |                                                                                     | 3     | 2.4E-1  | 9.7E-1    |
| <input type="checkbox"/> | GOTERM_BP_ALL   | <a href="#">cerebellar Purkinje cell layer morphogenesis</a>             | <a href="#">RT</a> |                                                                                     | 3     | 2.4E-1  | 9.7E-1    |
| <input type="checkbox"/> | GOTERM_BP_ALL   | <a href="#">cerebellar Purkinje cell differentiation</a>                 | <a href="#">RT</a> |                                                                                     | 3     | 2.4E-1  | 9.7E-1    |
| <input type="checkbox"/> | GOTERM_BP_ALL   | <a href="#">cerebellar cortex formation</a>                              | <a href="#">RT</a> |                                                                                     | 3     | 2.8E-1  | 9.7E-1    |
| <input type="checkbox"/> | GOTERM_BP_ALL   | <a href="#">cell differentiation in hindbrain</a>                        | <a href="#">RT</a> |                                                                                     | 3     | 2.8E-1  | 9.7E-1    |
| <input type="checkbox"/> | GOTERM_BP_ALL   | <a href="#">cerebellum development</a>                                   | <a href="#">RT</a> |                                                                                     | 4     | 2.9E-1  | 9.8E-1    |
| <input type="checkbox"/> | GOTERM_BP_ALL   | <a href="#">metencephalon development</a>                                | <a href="#">RT</a> |                                                                                     | 4     | 2.9E-1  | 9.8E-1    |
| <input type="checkbox"/> | GOTERM_BP_ALL   | <a href="#">nitric oxide biosynthetic process</a>                        | <a href="#">RT</a> |                                                                                     | 4     | 3.4E-1  | 9.8E-1    |
| <input type="checkbox"/> | GOTERM_BP_ALL   | <a href="#">nitric oxide metabolic process</a>                           | <a href="#">RT</a> |                                                                                     | 4     | 3.4E-1  | 9.8E-1    |
| <input type="checkbox"/> | SP_PIR_KEYWORDS | <a href="#">disease mutation</a>                                         | <a href="#">RT</a> |                                                                                     | 9     | 3.5E-1  | 9.7E-1    |
| <input type="checkbox"/> | GOTERM_BP_ALL   | <a href="#">cerebellar cortex morphogenesis</a>                          | <a href="#">RT</a> |                                                                                     | 3     | 3.8E-1  | 9.9E-1    |
| <input type="checkbox"/> | GOTERM_BP_ALL   | <a href="#">cerebellum morphogenesis</a>                                 | <a href="#">RT</a> |                                                                                     | 3     | 4.1E-1  | 9.9E-1    |
| <input type="checkbox"/> | GOTERM_BP_ALL   | <a href="#">hindbrain morphogenesis</a>                                  | <a href="#">RT</a> |                                                                                     | 3     | 4.4E-1  | 9.9E-1    |
| <input type="checkbox"/> | GOTERM_BP_ALL   | <a href="#">hindbrain development</a>                                    | <a href="#">RT</a> |                                                                                     | 5     | 4.8E-1  | 1.0E0     |
| Annotation Cluster 92    |                 | Enrichment Score: 0.7                                                    | <b>G</b>           |  | Count | P_Value | Benjamini |
| <input type="checkbox"/> | UP_SEQ_FEATURE  | metal ion-binding site:Calcium 3 (via carbonyl oxygen)                   | <a href="#">RT</a> |                                                                                     | 6     | 7.5E-3  | 1.0E0     |
| <input type="checkbox"/> | UP_SEQ_FEATURE  | propeptide:Activation peptide                                            | <a href="#">RT</a> |                                                                                     | 12    | 1.0E-2  | 1.0E0     |
| <input type="checkbox"/> | UP_SEQ_FEATURE  | metal ion-binding site:Calcium 4 (via carbonyl oxygen)                   | <a href="#">RT</a> |                                                                                     | 4     | 1.8E-2  | 1.0E0     |
| <input type="checkbox"/> | UP_SEQ_FEATURE  | metal ion-binding site:Zinc 2 (in inhibited form)                        | <a href="#">RT</a> |                                                                                     | 4     | 5.1E-2  | 1.0E0     |
| <input type="checkbox"/> | UP_SEQ_FEATURE  | metal ion-binding site:Zinc 2 (catalytic)                                | <a href="#">RT</a> |                                                                                     | 4     | 6.6E-2  | 1.0E0     |
| <input type="checkbox"/> | UP_SEQ_FEATURE  | metal ion-binding site:Calcium 1                                         | <a href="#">RT</a> |                                                                                     | 7     | 9.2E-2  | 1.0E0     |
| <input type="checkbox"/> | UP_SEQ_FEATURE  | metal ion-binding site:Calcium 3                                         | <a href="#">RT</a> |                                                                                     | 5     | 1.2E-1  | 1.0E0     |
| <input type="checkbox"/> | UP_SEQ_FEATURE  | metal ion-binding site:Calcium 2                                         | <a href="#">RT</a> |                                                                                     | 7     | 1.2E-1  | 1.0E0     |
| <input type="checkbox"/> | INTERPRO        | <a href="#">Hemopexin</a>                                                | <a href="#">RT</a> |                                                                                     | 5     | 1.3E-1  | 1.0E0     |
| <input type="checkbox"/> | GOTERM_BP_ALL   | <a href="#">peptidoglycan metabolic process</a>                          | <a href="#">RT</a> |                                                                                     | 5     | 1.3E-1  | 9.2E-1    |
| <input type="checkbox"/> | SMART           | <a href="#">HX</a>                                                       | <a href="#">RT</a> |                                                                                     | 5     | 1.7E-1  | 9.1E-1    |
| <input type="checkbox"/> | SP_PIR_KEYWORDS | <a href="#">collagen degradation</a>                                     | <a href="#">RT</a> |                                                                                     | 4     | 1.7E-1  | 9.0E-1    |
| <input type="checkbox"/> | UP_SEQ_FEATURE  | metal ion-binding site:Calcium 2 (via carbonyl oxygen)                   | <a href="#">RT</a> |                                                                                     | 5     | 1.7E-1  | 1.0E0     |
| <input type="checkbox"/> | INTERPRO        | <a href="#">Peptidoglycan binding-like</a>                               | <a href="#">RT</a> |                                                                                     | 4     | 2.0E-1  | 1.0E0     |
| <input type="checkbox"/> | GOTERM_BP_ALL   | <a href="#">collagen catabolic process</a>                               | <a href="#">RT</a> |                                                                                     | 4     | 2.2E-1  | 9.6E-1    |
| <input type="checkbox"/> | GOTERM_BP_ALL   | <a href="#">multicellular organismal protein catabolic process</a>       | <a href="#">RT</a> |                                                                                     | 4     | 2.2E-1  | 9.6E-1    |
| <input type="checkbox"/> | GOTERM_BP_ALL   | <a href="#">protein digestion</a>                                        | <a href="#">RT</a> |                                                                                     | 4     | 2.2E-1  | 9.6E-1    |
| <input type="checkbox"/> | GOTERM_BP_ALL   | <a href="#">multicellular organismal macromolecule metabolic process</a> | <a href="#">RT</a> |                                                                                     | 4     | 2.2E-1  | 9.6E-1    |
| <input type="checkbox"/> | GOTERM_BP_ALL   | <a href="#">multicellular organismal macromolecule catabolic process</a> | <a href="#">RT</a> |                                                                                     | 4     | 2.2E-1  | 9.6E-1    |
| <input type="checkbox"/> | GOTERM_BP_ALL   | <a href="#">multicellular organismal protein metabolic process</a>       | <a href="#">RT</a> |                                                                                     | 4     | 2.2E-1  | 9.6E-1    |
| <input type="checkbox"/> | UP_SEQ_FEATURE  | domain:Hemopexin-like 4                                                  | <a href="#">RT</a> |                                                                                     | 4     | 2.3E-1  | 1.0E0     |
| <input type="checkbox"/> | UP_SEQ_FEATURE  | domain:Hemopexin-like 3                                                  | <a href="#">RT</a> |                                                                                     | 4     | 2.3E-1  | 1.0E0     |
| <input type="checkbox"/> | GOTERM_BP_ALL   | <a href="#">collagen metabolic process</a>                               | <a href="#">RT</a> |                                                                                     | 4     | 2.5E-1  | 9.6E-1    |
| <input type="checkbox"/> | GOTERM_BP_ALL   | <a href="#">multicellular organismal catabolic process</a>               | <a href="#">RT</a> |                                                                                     | 4     | 2.5E-1  | 9.6E-1    |
| <input type="checkbox"/> | UP_SEQ_FEATURE  | metal ion-binding site:Zinc 1                                            | <a href="#">RT</a> |                                                                                     | 7     | 2.5E-1  | 1.0E0     |

| <input type="checkbox"/> | UP_SEQ_FEATURE        | domain:Hemopexin-like 2                                                        | <a href="#">RT</a> |  |  |  | 4     | 2.6E-1  | 1.0E0     |  |
|--------------------------|-----------------------|--------------------------------------------------------------------------------|--------------------|--|--|--|-------|---------|-----------|--|
| <input type="checkbox"/> | UP_SEQ_FEATURE        | domain:Hemopexin-like 1                                                        | <a href="#">RT</a> |  |  |  | 4     | 2.6E-1  | 1.0E0     |  |
| <input type="checkbox"/> | SP_PIR_KEYWORDS       | <a href="#">metalloproteinase</a>                                              | <a href="#">RT</a> |  |  |  | 3     | 3.0E-1  | 9.7E-1    |  |
| <input type="checkbox"/> | INTERPRO              | <a href="#">Peptidase, metallopeptidases</a>                                   | <a href="#">RT</a> |  |  |  | 4     | 3.4E-1  | 1.0E0     |  |
| <input type="checkbox"/> | GOTERM_BP_ALL         | <a href="#">multicellular organismal metabolic process</a>                     | <a href="#">RT</a> |  |  |  | 4     | 3.4E-1  | 9.8E-1    |  |
| <input type="checkbox"/> | PIR_SUPERFAMILY       | PIRSF001191:matrix metalloproteinase, stromelysin type                         | <a href="#">RT</a> |  |  |  | 3     | 3.8E-1  | 1.0E0     |  |
| <input type="checkbox"/> | SMART                 | <a href="#">ZnMc</a>                                                           | <a href="#">RT</a> |  |  |  | 4     | 4.0E-1  | 9.8E-1    |  |
| <input type="checkbox"/> | UP_SEQ_FEATURE        | metal ion-binding site:Calcium 1 (via carbonyl oxygen)                         | <a href="#">RT</a> |  |  |  | 4     | 4.1E-1  | 1.0E0     |  |
| <input type="checkbox"/> | UP_SEQ_FEATURE        | short sequence motif:Cysteine switch                                           | <a href="#">RT</a> |  |  |  | 4     | 5.9E-1  | 1.0E0     |  |
| <input type="checkbox"/> | INTERPRO              | <a href="#">Peptidase M10A and M12B, matrixin and adamalysin</a>               | <a href="#">RT</a> |  |  |  | 4     | 5.9E-1  | 1.0E0     |  |
| <input type="checkbox"/> | GOTERM_BP_ALL         | <a href="#">digestion</a>                                                      | <a href="#">RT</a> |  |  |  | 4     | 7.9E-1  | 1.0E0     |  |
| <input type="checkbox"/> | INTERPRO              | <a href="#">Peptidase M, neutral zinc metallopeptidases, zinc-binding site</a> | <a href="#">RT</a> |  |  |  | 5     | 8.9E-1  | 1.0E0     |  |
| <input type="checkbox"/> | GOTERM_MF_ALL         | <a href="#">metalloendopeptidase activity</a>                                  | <a href="#">RT</a> |  |  |  | 6     | 9.4E-1  | 1.0E0     |  |
| <input type="checkbox"/> | SP_PIR_KEYWORDS       | <a href="#">metalloprotease</a>                                                | <a href="#">RT</a> |  |  |  | 5     | 1.0E0   | 1.0E0     |  |
|                          | Annotation Cluster 93 | Enrichment Score: 0.69                                                         | <b>G</b>           |  |  |  | Count | P_Value | Benjamini |  |
| <input type="checkbox"/> | INTERPRO              | <a href="#">Spectrin repeat</a>                                                | <a href="#">RT</a> |  |  |  | 7     | 4.5E-2  | 1.0E0     |  |
| <input type="checkbox"/> | INTERPRO              | <a href="#">Actin-binding, actinin-type</a>                                    | <a href="#">RT</a> |  |  |  | 6     | 6.7E-2  | 1.0E0     |  |
| <input type="checkbox"/> | SMART                 | <a href="#">SPEC</a>                                                           | <a href="#">RT</a> |  |  |  | 7     | 6.8E-2  | 8.8E-1    |  |
| <input type="checkbox"/> | UP_SEQ_FEATURE        | domain:CH 1                                                                    | <a href="#">RT</a> |  |  |  | 4     | 2.6E-1  | 1.0E0     |  |
| <input type="checkbox"/> | UP_SEQ_FEATURE        | domain:CH 2                                                                    | <a href="#">RT</a> |  |  |  | 4     | 2.6E-1  | 1.0E0     |  |
| <input type="checkbox"/> | INTERPRO              | <a href="#">Calponin-like actin-binding</a>                                    | <a href="#">RT</a> |  |  |  | 8     | 2.8E-1  | 1.0E0     |  |
| <input type="checkbox"/> | UP_SEQ_FEATURE        | repeat:Spectrin 4                                                              | <a href="#">RT</a> |  |  |  | 3     | 2.9E-1  | 1.0E0     |  |
| <input type="checkbox"/> | UP_SEQ_FEATURE        | repeat:Spectrin 3                                                              | <a href="#">RT</a> |  |  |  | 3     | 3.2E-1  | 1.0E0     |  |
| <input type="checkbox"/> | UP_SEQ_FEATURE        | repeat:Spectrin 1                                                              | <a href="#">RT</a> |  |  |  | 3     | 3.2E-1  | 1.0E0     |  |
| <input type="checkbox"/> | UP_SEQ_FEATURE        | repeat:Spectrin 2                                                              | <a href="#">RT</a> |  |  |  | 3     | 3.2E-1  | 1.0E0     |  |
| <input type="checkbox"/> | UP_SEQ_FEATURE        | domain:Actin-binding                                                           | <a href="#">RT</a> |  |  |  | 3     | 3.5E-1  | 1.0E0     |  |
| <input type="checkbox"/> | SMART                 | <a href="#">CH</a>                                                             | <a href="#">RT</a> |  |  |  | 8     | 3.7E-1  | 9.7E-1    |  |
|                          | Annotation Cluster 94 | Enrichment Score: 0.69                                                         | <b>G</b>           |  |  |  | Count | P_Value | Benjamini |  |
| <input type="checkbox"/> | INTERPRO              | <a href="#">Death</a>                                                          | <a href="#">RT</a> |  |  |  | 7     | 5.2E-2  | 1.0E0     |  |
| <input type="checkbox"/> | SMART                 | <a href="#">DEATH</a>                                                          | <a href="#">RT</a> |  |  |  | 7     | 8.7E-2  | 8.5E-1    |  |
| <input type="checkbox"/> | UP_SEQ_FEATURE        | domain:Death                                                                   | <a href="#">RT</a> |  |  |  | 4     | 3.1E-1  | 1.0E0     |  |
| <input type="checkbox"/> | INTERPRO              | <a href="#">DEATH-like</a>                                                     | <a href="#">RT</a> |  |  |  | 6     | 4.0E-1  | 1.0E0     |  |
| <input type="checkbox"/> | BIOCARTA              | <a href="#">TNF/Stress Related Signaling</a>                                   | <a href="#">RT</a> |  |  |  | 4     | 6.3E-1  | 1.0E0     |  |
|                          | Annotation Cluster 95 | Enrichment Score: 0.69                                                         | <b>G</b>           |  |  |  | Count | P_Value | Benjamini |  |
| <input type="checkbox"/> | GOTERM_BP_ALL         | <a href="#">cytokine production</a>                                            | <a href="#">RT</a> |  |  |  | 18    | 2.1E-2  | 5.8E-1    |  |
| <input type="checkbox"/> | GOTERM_BP_ALL         | <a href="#">regulation of translation</a>                                      | <a href="#">RT</a> |  |  |  | 19    | 1.1E-1  | 9.0E-1    |  |
| <input type="checkbox"/> | GOTERM_BP_ALL         | <a href="#">regulation of cellular biosynthetic process</a>                    | <a href="#">RT</a> |  |  |  | 20    | 1.2E-1  | 9.0E-1    |  |
| <input type="checkbox"/> | GOTERM_BP_ALL         | <a href="#">cytokine metabolic process</a>                                     | <a href="#">RT</a> |  |  |  | 11    | 1.3E-1  | 9.2E-1    |  |
| <input type="checkbox"/> | GOTERM_BP_ALL         | <a href="#">cytokine biosynthetic process</a>                                  | <a href="#">RT</a> |  |  |  | 11    | 1.3E-1  | 9.2E-1    |  |
| <input type="checkbox"/> | GOTERM_BP_ALL         | <a href="#">regulation of biosynthetic process</a>                             | <a href="#">RT</a> |  |  |  | 21    | 1.7E-1  | 9.5E-1    |  |
| <input type="checkbox"/> | GOTERM_BP_ALL         | <a href="#">positive regulation of translation</a>                             | <a href="#">RT</a> |  |  |  | 8     | 1.8E-1  | 9.5E-1    |  |
| <input type="checkbox"/> | GOTERM_BP_ALL         | <a href="#">interleukin-2 biosynthetic process</a>                             | <a href="#">RT</a> |  |  |  | 4     | 2.0E-1  | 9.6E-1    |  |
| <input type="checkbox"/> | GOTERM_BP_ALL         | <a href="#">positive regulation of interleukin-2 biosynthetic process</a>      | <a href="#">RT</a> |  |  |  | 3     | 2.1E-1  | 9.6E-1    |  |
| <input type="checkbox"/> | GOTERM_BP_ALL         | <a href="#">interleukin-2 production</a>                                       | <a href="#">RT</a> |  |  |  | 4     | 2.2E-1  | 9.6E-1    |  |
| <input type="checkbox"/> | GOTERM_BP_ALL         | <a href="#">positive regulation of cellular biosynthetic process</a>           | <a href="#">RT</a> |  |  |  | 8     | 2.3E-1  | 9.6E-1    |  |
| <input type="checkbox"/> | GOTERM_BP_ALL         | <a href="#">regulation of cytokine biosynthetic process</a>                    | <a href="#">RT</a> |  |  |  | 9     | 2.4E-1  | 9.7E-1    |  |
| <input type="checkbox"/> | GOTERM_BP_ALL         | <a href="#">regulation of protein metabolic process</a>                        | <a href="#">RT</a> |  |  |  | 29    | 2.4E-1  | 9.7E-1    |  |

|                          |                 |                                                                         |                        |          |    |        |        |
|--------------------------|-----------------|-------------------------------------------------------------------------|------------------------|----------|----|--------|--------|
| <input type="checkbox"/> | GOTERM_BP_ALL   | <a href="#">regulation of interleukin-2 biosynthetic process</a>        | <a href="#">RT</a>     |          | 3  | 3.8E-1 | 9.9E-1 |
| <input type="checkbox"/> | GOTERM_BP_ALL   | <a href="#">positive regulation of cytokine biosynthetic process</a>    | <a href="#">RT</a>     |          | 6  | 3.8E-1 | 9.9E-1 |
| <input type="checkbox"/> | GOTERM_BP_ALL   | <a href="#">positive regulation of biosynthetic process</a>             | <a href="#">RT</a>     |          | 8  | 4.0E-1 | 9.9E-1 |
| <input type="checkbox"/> | GOTERM_BP_ALL   | <a href="#">positive regulation of protein metabolic process</a>        | <a href="#">RT</a>     |          | 10 | 4.5E-1 | 9.9E-1 |
| <input type="checkbox"/> | GOTERM_BP_ALL   | <a href="#">translation</a>                                             | <a href="#">RT</a>     |          | 29 | 9.8E-1 | 1.0E0  |
|                          |                 | Annotation Cluster 96                                                   | Enrichment Score: 0.68 | <b>G</b> |    |        |        |
| <input type="checkbox"/> | GOTERM_MF_ALL   | <a href="#">GTPase activator activity</a>                               | <a href="#">RT</a>     |          | 22 | 7.1E-2 | 9.7E-1 |
| <input type="checkbox"/> | GOTERM_MF_ALL   | <a href="#">enzyme activator activity</a>                               | <a href="#">RT</a>     |          | 26 | 1.5E-1 | 9.9E-1 |
| <input type="checkbox"/> | GOTERM_MF_ALL   | <a href="#">Ras GTPase activator activity</a>                           | <a href="#">RT</a>     |          | 9  | 2.0E-1 | 1.0E0  |
| <input type="checkbox"/> | GOTERM_BP_ALL   | <a href="#">regulation of GTPase activity</a>                           | <a href="#">RT</a>     |          | 9  | 4.1E-1 | 9.9E-1 |
| <input type="checkbox"/> | SP_PIR_KEYWORDS | <a href="#">gtpase activation</a>                                       | <a href="#">RT</a>     |          | 9  | 4.4E-1 | 9.9E-1 |
|                          |                 | Annotation Cluster 97                                                   | Enrichment Score: 0.68 | <b>G</b> |    |        |        |
| <input type="checkbox"/> | GOTERM_BP_ALL   | <a href="#">regulation of Rab GTPase activity</a>                       | <a href="#">RT</a>     |          | 7  | 1.0E-1 | 8.9E-1 |
| <input type="checkbox"/> | GOTERM_BP_ALL   | <a href="#">regulation of Rab protein signal transduction</a>           | <a href="#">RT</a>     |          | 7  | 1.0E-1 | 8.9E-1 |
| <input type="checkbox"/> | GOTERM_BP_ALL   | <a href="#">Rab protein signal transduction</a>                         | <a href="#">RT</a>     |          | 7  | 1.0E-1 | 8.9E-1 |
| <input type="checkbox"/> | GOTERM_MF_ALL   | <a href="#">Rab GTPase activator activity</a>                           | <a href="#">RT</a>     |          | 7  | 1.3E-1 | 9.9E-1 |
| <input type="checkbox"/> | GOTERM_BP_ALL   | <a href="#">regulation of Ras GTPase activity</a>                       | <a href="#">RT</a>     |          | 7  | 1.9E-1 | 9.5E-1 |
| <input type="checkbox"/> | GOTERM_MF_ALL   | <a href="#">Ras GTPase activator activity</a>                           | <a href="#">RT</a>     |          | 9  | 2.0E-1 | 1.0E0  |
| <input type="checkbox"/> | SMART           | <a href="#">TBC</a>                                                     | <a href="#">RT</a>     |          | 6  | 2.9E-1 | 9.6E-1 |
| <input type="checkbox"/> | INTERPRO        | <a href="#">RabGAP/TBC</a>                                              | <a href="#">RT</a>     |          | 5  | 3.5E-1 | 1.0E0  |
| <input type="checkbox"/> | GOTERM_BP_ALL   | <a href="#">regulation of GTPase activity</a>                           | <a href="#">RT</a>     |          | 9  | 4.1E-1 | 9.9E-1 |
| <input type="checkbox"/> | GOTERM_BP_ALL   | <a href="#">regulation of hydrolase activity</a>                        | <a href="#">RT</a>     |          | 13 | 6.5E-1 | 1.0E0  |
|                          |                 | Annotation Cluster 98                                                   | Enrichment Score: 0.68 | <b>G</b> |    |        |        |
| <input type="checkbox"/> | GOTERM_BP_ALL   | <a href="#">regulation of cyclic nucleotide metabolic process</a>       | <a href="#">RT</a>     |          | 3  | 1.8E-1 | 9.5E-1 |
| <input type="checkbox"/> | GOTERM_BP_ALL   | <a href="#">cyclic nucleotide metabolic process</a>                     | <a href="#">RT</a>     |          | 6  | 2.1E-1 | 9.6E-1 |
| <input type="checkbox"/> | GOTERM_BP_ALL   | <a href="#">regulation of nucleotide metabolic process</a>              | <a href="#">RT</a>     |          | 3  | 2.4E-1 | 9.7E-1 |
|                          |                 | Annotation Cluster 99                                                   | Enrichment Score: 0.68 | <b>G</b> |    |        |        |
| <input type="checkbox"/> | SP_PIR_KEYWORDS | <a href="#">hydrogen peroxide</a>                                       | <a href="#">RT</a>     |          | 3  | 3.8E-2 | 6.2E-1 |
| <input type="checkbox"/> | KEGG_PATHWAY    | <a href="#">Methane metabolism</a>                                      | <a href="#">RT</a>     |          | 4  | 4.8E-2 | 5.2E-1 |
| <input type="checkbox"/> | GOTERM_BP_ALL   | <a href="#">response to oxidative stress</a>                            | <a href="#">RT</a>     |          | 10 | 7.0E-2 | 8.3E-1 |
| <input type="checkbox"/> | GOTERM_BP_ALL   | <a href="#">hydrogen peroxide catabolic process</a>                     | <a href="#">RT</a>     |          | 3  | 1.2E-1 | 9.0E-1 |
| <input type="checkbox"/> | GOTERM_BP_ALL   | <a href="#">oxygen and reactive oxygen species metabolic process</a>    | <a href="#">RT</a>     |          | 6  | 1.9E-1 | 9.6E-1 |
| <input type="checkbox"/> | GOTERM_BP_ALL   | <a href="#">hydrogen peroxide metabolic process</a>                     | <a href="#">RT</a>     |          | 3  | 2.1E-1 | 9.6E-1 |
| <input type="checkbox"/> | GOTERM_BP_ALL   | <a href="#">response to reactive oxygen species</a>                     | <a href="#">RT</a>     |          | 4  | 2.5E-1 | 9.6E-1 |
| <input type="checkbox"/> | GOTERM_BP_ALL   | <a href="#">response to hydrogen peroxide</a>                           | <a href="#">RT</a>     |          | 3  | 3.1E-1 | 9.8E-1 |
| <input type="checkbox"/> | SP_PIR_KEYWORDS | <a href="#">Peroxidase</a>                                              | <a href="#">RT</a>     |          | 4  | 3.3E-1 | 9.7E-1 |
| <input type="checkbox"/> | GOTERM_MF_ALL   | <a href="#">oxidoreductase activity, acting on peroxide as acceptor</a> | <a href="#">RT</a>     |          | 5  | 5.3E-1 | 1.0E0  |
| <input type="checkbox"/> | GOTERM_MF_ALL   | <a href="#">peroxidase activity</a>                                     | <a href="#">RT</a>     |          | 5  | 5.3E-1 | 1.0E0  |
| <input type="checkbox"/> | GOTERM_MF_ALL   | <a href="#">antioxidant activity</a>                                    | <a href="#">RT</a>     |          | 6  | 5.4E-1 | 1.0E0  |
| <input type="checkbox"/> | UP_SEQ_FEATURE  | metal ion-binding site:Iron (heme axial ligand)                         | <a href="#">RT</a>     |          | 7  | 6.3E-1 | 1.0E0  |
|                          |                 | Annotation Cluster 100                                                  | Enrichment Score: 0.67 | <b>G</b> |    |        |        |
| <input type="checkbox"/> | GOTERM_BP_ALL   | <a href="#">chondrocyte differentiation</a>                             | <a href="#">RT</a>     |          | 7  | 3.0E-3 | 2.6E-1 |
| <input type="checkbox"/> | GOTERM_BP_ALL   | <a href="#">lung development</a>                                        | <a href="#">RT</a>     |          | 5  | 8.6E-1 | 1.0E0  |
| <input type="checkbox"/> | GOTERM_BP_ALL   | <a href="#">respiratory tube development</a>                            | <a href="#">RT</a>     |          | 5  | 8.7E-1 | 1.0E0  |
| <input type="checkbox"/> | GOTERM_BP_ALL   | <a href="#">cell fate commitment</a>                                    | <a href="#">RT</a>     |          | 6  | 9.6E-1 | 1.0E0  |
|                          |                 | Annotation Cluster 101                                                  | Enrichment Score: 0.66 | <b>G</b> |    |        |        |
| <input type="checkbox"/> | GOTERM_BP_ALL   | <a href="#">post-Golgi vesicle-mediated transport</a>                   | <a href="#">RT</a>     |          | 4  | 1.1E-1 | 9.0E-1 |



|                          |                        |                                                                          |                    |  |       |         |           |
|--------------------------|------------------------|--------------------------------------------------------------------------|--------------------|--|-------|---------|-----------|
| <input type="checkbox"/> | GOTERM_BP_ALL          | <a href="#">Golgi to plasma membrane transport</a>                       | <a href="#">RT</a> |  | 3     | 1.2E-1  | 9.0E-1    |
| <input type="checkbox"/> | GOTERM_BP_ALL          | <a href="#">Golgi vesicle transport</a>                                  | <a href="#">RT</a> |  | 7     | 7.7E-1  | 1.0E0     |
|                          | Annotation Cluster 102 | Enrichment Score: 0.66                                                   | <b>G</b>           |  | Count | P_Value | Benjamini |
| <input type="checkbox"/> | UP_SEQ_FEATURE         | domain:UBX                                                               | <a href="#">RT</a> |  | 3     | 1.2E-1  | 1.0E0     |
| <input type="checkbox"/> | INTERPRO               | <a href="#">UBX</a>                                                      | <a href="#">RT</a> |  | 3     | 2.8E-1  | 1.0E0     |
| <input type="checkbox"/> | SMART                  | <a href="#">UBX</a>                                                      | <a href="#">RT</a> |  | 3     | 3.2E-1  | 9.6E-1    |
|                          | Annotation Cluster 103 | Enrichment Score: 0.65                                                   | <b>G</b>           |  | Count | P_Value | Benjamini |
| <input type="checkbox"/> | GOTERM_BP_ALL          | <a href="#">sterol homeostasis</a>                                       | <a href="#">RT</a> |  | 4     | 2.2E-1  | 9.6E-1    |
| <input type="checkbox"/> | GOTERM_BP_ALL          | <a href="#">cholesterol homeostasis</a>                                  | <a href="#">RT</a> |  | 4     | 2.2E-1  | 9.6E-1    |
| <input type="checkbox"/> | GOTERM_BP_ALL          | <a href="#">lipid homeostasis</a>                                        | <a href="#">RT</a> |  | 4     | 2.2E-1  | 9.6E-1    |
|                          | Annotation Cluster 104 | Enrichment Score: 0.65                                                   | <b>G</b>           |  | Count | P_Value | Benjamini |
| <input type="checkbox"/> | GOTERM_MF_ALL          | <a href="#">C-C chemokine receptor activity</a>                          | <a href="#">RT</a> |  | 5     | 7.3E-2  | 9.7E-1    |
| <input type="checkbox"/> | GOTERM_MF_ALL          | <a href="#">C-C chemokine binding</a>                                    | <a href="#">RT</a> |  | 5     | 7.3E-2  | 9.7E-1    |
| <input type="checkbox"/> | GOTERM_MF_ALL          | <a href="#">cytokine binding</a>                                         | <a href="#">RT</a> |  | 12    | 1.1E-1  | 9.9E-1    |
| <input type="checkbox"/> | GOTERM_MF_ALL          | <a href="#">chemokine receptor activity</a>                              | <a href="#">RT</a> |  | 5     | 1.6E-1  | 1.0E0     |
| <input type="checkbox"/> | INTERPRO               | <a href="#">Chemokine receptor</a>                                       | <a href="#">RT</a> |  | 4     | 1.7E-1  | 1.0E0     |
| <input type="checkbox"/> | GOTERM_MF_ALL          | <a href="#">chemokine binding</a>                                        | <a href="#">RT</a> |  | 5     | 1.8E-1  | 1.0E0     |
| <input type="checkbox"/> | GOTERM_MF_ALL          | <a href="#">peptide receptor activity</a>                                | <a href="#">RT</a> |  | 10    | 6.6E-1  | 1.0E0     |
| <input type="checkbox"/> | GOTERM_MF_ALL          | <a href="#">peptide binding</a>                                          | <a href="#">RT</a> |  | 12    | 7.0E-1  | 1.0E0     |
| <input type="checkbox"/> | PIR_SUPERFAMILY        | PIRSF002406:vertebrate rhodopsin                                         | <a href="#">RT</a> |  | 4     | 9.7E-1  | 1.0E0     |
|                          | Annotation Cluster 105 | Enrichment Score: 0.65                                                   | <b>G</b>           |  | Count | P_Value | Benjamini |
| <input type="checkbox"/> | SP_PIR_KEYWORDS        | <a href="#">cytokine</a>                                                 | <a href="#">RT</a> |  | 24    | 1.8E-2  | 4.5E-1    |
| <input type="checkbox"/> | GOTERM_MF_ALL          | <a href="#">cytokine activity</a>                                        | <a href="#">RT</a> |  | 24    | 2.3E-1  | 1.0E0     |
| <input type="checkbox"/> | GOTERM_MF_ALL          | <a href="#">growth factor activity</a>                                   | <a href="#">RT</a> |  | 14    | 6.9E-1  | 1.0E0     |
| <input type="checkbox"/> | GOTERM_MF_ALL          | <a href="#">receptor binding</a>                                         | <a href="#">RT</a> |  | 49    | 8.8E-1  | 1.0E0     |
|                          | Annotation Cluster 106 | Enrichment Score: 0.65                                                   | <b>G</b>           |  | Count | P_Value | Benjamini |
| <input type="checkbox"/> | KEGG_PATHWAY           | <a href="#">Glycolysis / Gluconeogenesis</a>                             | <a href="#">RT</a> |  | 9     | 1.2E-1  | 6.3E-1    |
| <input type="checkbox"/> | KEGG_PATHWAY           | <a href="#">Propanoate metabolism</a>                                    | <a href="#">RT</a> |  | 5     | 2.9E-1  | 8.3E-1    |
| <input type="checkbox"/> | KEGG_PATHWAY           | <a href="#">Pyruvate metabolism</a>                                      | <a href="#">RT</a> |  | 6     | 3.3E-1  | 8.4E-1    |
|                          | Annotation Cluster 107 | Enrichment Score: 0.64                                                   | <b>G</b>           |  | Count | P_Value | Benjamini |
| <input type="checkbox"/> | GOTERM_BP_ALL          | <a href="#">gastrulation</a>                                             | <a href="#">RT</a> |  | 10    | 7.6E-2  | 8.5E-1    |
| <input type="checkbox"/> | GOTERM_BP_ALL          | <a href="#">gastrulation with mouth forming second</a>                   | <a href="#">RT</a> |  | 4     | 3.9E-1  | 9.9E-1    |
| <input type="checkbox"/> | GOTERM_BP_ALL          | <a href="#">gastrulation (sensu Vertebrata)</a>                          | <a href="#">RT</a> |  | 4     | 3.9E-1  | 9.9E-1    |
|                          | Annotation Cluster 108 | Enrichment Score: 0.64                                                   | <b>G</b>           |  | Count | P_Value | Benjamini |
| <input type="checkbox"/> | INTERPRO               | <a href="#">Regulator of chromosome condensation, RCC1</a>               | <a href="#">RT</a> |  | 5     | 1.6E-1  | 1.0E0     |
| <input type="checkbox"/> | UP_SEQ_FEATURE         | repeat:RCC1 2                                                            | <a href="#">RT</a> |  | 3     | 2.2E-1  | 1.0E0     |
| <input type="checkbox"/> | UP_SEQ_FEATURE         | repeat:RCC1 3                                                            | <a href="#">RT</a> |  | 3     | 2.2E-1  | 1.0E0     |
| <input type="checkbox"/> | UP_SEQ_FEATURE         | repeat:RCC1 4                                                            | <a href="#">RT</a> |  | 3     | 2.2E-1  | 1.0E0     |
| <input type="checkbox"/> | UP_SEQ_FEATURE         | repeat:RCC1 5                                                            | <a href="#">RT</a> |  | 3     | 2.2E-1  | 1.0E0     |
| <input type="checkbox"/> | UP_SEQ_FEATURE         | repeat:RCC1 1                                                            | <a href="#">RT</a> |  | 3     | 2.2E-1  | 1.0E0     |
| <input type="checkbox"/> | COG_ONTOLOGY           | <a href="#">Cell division and chromosome partitioning / Cytoskeleton</a> | <a href="#">RT</a> |  | 3     | 4.3E-1  | 1.0E0     |
|                          | Annotation Cluster 109 | Enrichment Score: 0.63                                                   | <b>G</b>           |  | Count | P_Value | Benjamini |
| <input type="checkbox"/> | GOTERM_BP_ALL          | <a href="#">aspartate family amino acid biosynthetic process</a>         | <a href="#">RT</a> |  | 4     | 1.5E-1  | 9.4E-1    |
| <input type="checkbox"/> | GOTERM_BP_ALL          | <a href="#">aspartate family amino acid metabolic process</a>            | <a href="#">RT</a> |  | 4     | 2.0E-1  | 9.6E-1    |
| <input type="checkbox"/> | GOTERM_BP_ALL          | <a href="#">nitrogen compound biosynthetic process</a>                   | <a href="#">RT</a> |  | 12    | 2.1E-1  | 9.6E-1    |
| <input type="checkbox"/> | GOTERM_BP_ALL          | <a href="#">amino acid biosynthetic process</a>                          | <a href="#">RT</a> |  | 7     | 2.2E-1  | 9.6E-1    |
| <input type="checkbox"/> | SP_PIR_KEYWORDS        | <a href="#">amino-acid biosynthesis</a>                                  | <a href="#">RT</a> |  | 4     | 2.6E-1  | 9.5E-1    |
| <input type="checkbox"/> | GOTERM_BP_ALL          | <a href="#">amine biosynthetic process</a>                               | <a href="#">RT</a> |  | 8     | 4.4E-1  | 9.9E-1    |
|                          | Annotation Cluster 110 | Enrichment Score: 0.63                                                   | <b>G</b>           |  | Count | P_Value | Benjamini |

|                          |                 |                                                                                                           |                    |  |       |         |           |
|--------------------------|-----------------|-----------------------------------------------------------------------------------------------------------|--------------------|--|-------|---------|-----------|
| <input type="checkbox"/> | GOTERM_MF_ALL   | <a href="#">DNA topoisomerase (ATP-hydrolyzing) activity</a>                                              | <a href="#">RT</a> |  | 3     | 1.8E-1  | 1.0E0     |
| <input type="checkbox"/> | GOTERM_MF_ALL   | <a href="#">DNA topoisomerase activity</a>                                                                | <a href="#">RT</a> |  | 3     | 2.4E-1  | 1.0E0     |
| <input type="checkbox"/> | GOTERM_BP_ALL   | <a href="#">DNA topological change</a>                                                                    | <a href="#">RT</a> |  | 3     | 3.1E-1  | 9.8E-1    |
| Annotation Cluster 111   |                 | Enrichment Score: 0.63                                                                                    | <b>G</b>           |  | Count | P_Value | Benjamini |
| <input type="checkbox"/> | GOTERM_BP_ALL   | <a href="#">regulation of myeloid cell differentiation</a>                                                | <a href="#">RT</a> |  | 11    | 5.9E-3  | 3.5E-1    |
| <input type="checkbox"/> | GOTERM_BP_ALL   | <a href="#">regulation of osteoclast differentiation</a>                                                  | <a href="#">RT</a> |  | 4     | 2.5E-1  | 9.6E-1    |
| <input type="checkbox"/> | GOTERM_BP_ALL   | <a href="#">regulation of myeloid leukocyte differentiation</a>                                           | <a href="#">RT</a> |  | 4     | 3.7E-1  | 9.9E-1    |
| <input type="checkbox"/> | GOTERM_BP_ALL   | <a href="#">osteoclast differentiation</a>                                                                | <a href="#">RT</a> |  | 4     | 3.7E-1  | 9.9E-1    |
| <input type="checkbox"/> | BIOCARTA        | <a href="#">Regulation of hematopoiesis by cytokines</a>                                                  | <a href="#">RT</a> |  | 3     | 5.6E-1  | 1.0E0     |
| <input type="checkbox"/> | BIOCARTA        | <a href="#">Cytokines and Inflammatory Response</a>                                                       | <a href="#">RT</a> |  | 4     | 6.0E-1  | 1.0E0     |
| <input type="checkbox"/> | GOTERM_BP_ALL   | <a href="#">myeloid leukocyte differentiation</a>                                                         | <a href="#">RT</a> |  | 5     | 6.4E-1  | 1.0E0     |
| Annotation Cluster 112   |                 | Enrichment Score: 0.62                                                                                    | <b>G</b>           |  | Count | P_Value | Benjamini |
| <input type="checkbox"/> | GOTERM_BP_ALL   | <a href="#">antigen processing and presentation of peptide antigen</a>                                    | <a href="#">RT</a> |  | 7     | 9.4E-2  | 8.8E-1    |
| <input type="checkbox"/> | GOTERM_BP_ALL   | <a href="#">antigen processing and presentation of exogenous antigen</a>                                  | <a href="#">RT</a> |  | 5     | 1.6E-1  | 9.5E-1    |
| <input type="checkbox"/> | GOTERM_BP_ALL   | <a href="#">antigen processing and presentation of peptide or polysaccharide antigen via MHC class II</a> | <a href="#">RT</a> |  | 4     | 2.2E-1  | 9.6E-1    |
| <input type="checkbox"/> | GOTERM_BP_ALL   | <a href="#">antigen processing and presentation of exogenous peptide antigen</a>                          | <a href="#">RT</a> |  | 4     | 2.5E-1  | 9.6E-1    |
| <input type="checkbox"/> | GOTERM_BP_ALL   | <a href="#">antigen processing and presentation of peptide antigen via MHC class II</a>                   | <a href="#">RT</a> |  | 3     | 4.7E-1  | 1.0E0     |
| <input type="checkbox"/> | GOTERM_BP_ALL   | <a href="#">antigen processing and presentation of exogenous peptide antigen via MHC class II</a>         | <a href="#">RT</a> |  | 3     | 4.7E-1  | 1.0E0     |
| Annotation Cluster 113   |                 | Enrichment Score: 0.62                                                                                    | <b>G</b>           |  | Count | P_Value | Benjamini |
| <input type="checkbox"/> | GOTERM_BP_ALL   | <a href="#">negative regulation of cyclin-dependent protein kinase activity</a>                           | <a href="#">RT</a> |  | 3     | 1.8E-1  | 9.5E-1    |
| <input type="checkbox"/> | GOTERM_BP_ALL   | <a href="#">negative regulation of protein kinase activity</a>                                            | <a href="#">RT</a> |  | 7     | 2.2E-1  | 9.6E-1    |
| <input type="checkbox"/> | GOTERM_BP_ALL   | <a href="#">negative regulation of kinase activity</a>                                                    | <a href="#">RT</a> |  | 7     | 2.2E-1  | 9.6E-1    |
| <input type="checkbox"/> | GOTERM_BP_ALL   | <a href="#">regulation of cyclin-dependent protein kinase activity</a>                                    | <a href="#">RT</a> |  | 4     | 2.2E-1  | 9.6E-1    |
| <input type="checkbox"/> | GOTERM_BP_ALL   | <a href="#">negative regulation of transferase activity</a>                                               | <a href="#">RT</a> |  | 7     | 2.4E-1  | 9.7E-1    |
| <input type="checkbox"/> | GOTERM_BP_ALL   | <a href="#">negative regulation of catalytic activity</a>                                                 | <a href="#">RT</a> |  | 7     | 4.5E-1  | 9.9E-1    |
| Annotation Cluster 114   |                 | Enrichment Score: 0.61                                                                                    | <b>G</b>           |  | Count | P_Value | Benjamini |
| <input type="checkbox"/> | GOTERM_CC_ALL   | <a href="#">microbody</a>                                                                                 | <a href="#">RT</a> |  | 11    | 2.0E-1  | 9.9E-1    |
| <input type="checkbox"/> | GOTERM_CC_ALL   | <a href="#">peroxisome</a>                                                                                | <a href="#">RT</a> |  | 11    | 2.0E-1  | 9.9E-1    |
| <input type="checkbox"/> | SP_PIR_KEYWORDS | <a href="#">peroxisome</a>                                                                                | <a href="#">RT</a> |  | 9     | 3.7E-1  | 9.8E-1    |
| Annotation Cluster 115   |                 | Enrichment Score: 0.6                                                                                     | <b>G</b>           |  | Count | P_Value | Benjamini |
| <input type="checkbox"/> | INTERPRO        | <a href="#">Target SNARE coiled-coil region</a>                                                           | <a href="#">RT</a> |  | 6     | 5.8E-2  | 1.0E0     |
| <input type="checkbox"/> | SMART           | <a href="#">t SNARE</a>                                                                                   | <a href="#">RT</a> |  | 6     | 8.2E-2  | 8.6E-1    |
| <input type="checkbox"/> | KEGG_PATHWAY    | <a href="#">SNARE interactions in vesicular transport</a>                                                 | <a href="#">RT</a> |  | 6     | 1.9E-1  | 7.7E-1    |
| <input type="checkbox"/> | INTERPRO        | <a href="#">Syntaxin, N-terminal</a>                                                                      | <a href="#">RT</a> |  | 3     | 3.1E-1  | 1.0E0     |
| <input type="checkbox"/> | SMART           | <a href="#">SynN</a>                                                                                      | <a href="#">RT</a> |  | 3     | 3.5E-1  | 9.7E-1    |
| <input type="checkbox"/> | UP_SEQ_FEATURE  | domain:t-SNARE coiled-coil homology                                                                       | <a href="#">RT</a> |  | 3     | 3.9E-1  | 1.0E0     |
| <input type="checkbox"/> | INTERPRO        | <a href="#">Syntaxin/epimorphin coiled-coil</a>                                                           | <a href="#">RT</a> |  | 3     | 4.4E-1  | 1.0E0     |
| <input type="checkbox"/> | GOTERM_MF_ALL   | <a href="#">protein transporter activity</a>                                                              | <a href="#">RT</a> |  | 10    | 9.3E-1  | 1.0E0     |
| Annotation Cluster 116   |                 | Enrichment Score: 0.6                                                                                     | <b>G</b>           |  | Count | P_Value | Benjamini |
| <input type="checkbox"/> | INTERPRO        | <a href="#">WW/Rsp5/WWP</a>                                                                               | <a href="#">RT</a> |  | 7     | 2.1E-1  | 1.0E0     |
| <input type="checkbox"/> | UP_SEQ_FEATURE  | domain:WW                                                                                                 | <a href="#">RT</a> |  | 3     | 2.5E-1  | 1.0E0     |
| <input type="checkbox"/> | SMART           | <a href="#">WW</a>                                                                                        | <a href="#">RT</a> |  | 7     | 3.0E-1  | 9.6E-1    |
| Annotation Cluster 117   |                 | Enrichment Score: 0.59                                                                                    | <b>G</b>           |  | Count | P_Value | Benjamini |
| <input type="checkbox"/> | GOTERM_MF_ALL   | <a href="#">protein kinase activator activity</a>                                                         | <a href="#">RT</a> |  | 3     | 2.1E-1  | 1.0E0     |
| <input type="checkbox"/> | GOTERM_MF_ALL   | <a href="#">protein kinase regulator activity</a>                                                         | <a href="#">RT</a> |  | 9     | 2.4E-1  | 1.0E0     |

| <input type="checkbox"/> | GOTERM_MF_ALL          | <a href="#">kinase activator activity</a>                   | RT       |  |  |  |  | 3     | 3.4E-1  | 1.0E0     |
|--------------------------|------------------------|-------------------------------------------------------------|----------|--|--|--|--|-------|---------|-----------|
|                          | Annotation Cluster 118 | Enrichment Score: 0.58                                      | <b>G</b> |  |  |  |  | Count | P_Value | Benjamini |
| <input type="checkbox"/> | GOTERM_CC_ALL          | <a href="#">vacuolar membrane</a>                           | RT       |  |  |  |  | 4     | 2.3E-1  | 9.9E-1    |
| <input type="checkbox"/> | GOTERM_CC_ALL          | <a href="#">lysosomal membrane</a>                          | RT       |  |  |  |  | 3     | 2.3E-1  | 9.9E-1    |
| <input type="checkbox"/> | GOTERM_CC_ALL          | <a href="#">vacuolar part</a>                               | RT       |  |  |  |  | 4     | 3.3E-1  | 1.0E0     |
|                          | Annotation Cluster 119 | Enrichment Score: 0.58                                      | <b>G</b> |  |  |  |  | Count | P_Value | Benjamini |
| <input type="checkbox"/> | GOTERM_CC_ALL          | <a href="#">basolateral plasma membrane</a>                 | RT       |  |  |  |  | 11    | 1.3E-1  | 9.8E-1    |
| <input type="checkbox"/> | GOTERM_CC_ALL          | <a href="#">cell-matrix junction</a>                        | RT       |  |  |  |  | 6     | 2.3E-1  | 9.9E-1    |
| <input type="checkbox"/> | GOTERM_CC_ALL          | <a href="#">focal adhesion</a>                              | RT       |  |  |  |  | 5     | 2.6E-1  | 9.9E-1    |
| <input type="checkbox"/> | GOTERM_CC_ALL          | <a href="#">cell-substrate adherens junction</a>            | RT       |  |  |  |  | 5     | 3.4E-1  | 1.0E0     |
| <input type="checkbox"/> | GOTERM_CC_ALL          | <a href="#">adherens junction</a>                           | RT       |  |  |  |  | 7     | 5.0E-1  | 1.0E0     |
|                          | Annotation Cluster 120 | Enrichment Score: 0.58                                      | <b>G</b> |  |  |  |  | Count | P_Value | Benjamini |
| <input type="checkbox"/> | GOTERM_BP_ALL          | <a href="#">regionalization</a>                             | RT       |  |  |  |  | 17    | 2.0E-1  | 9.6E-1    |
| <input type="checkbox"/> | GOTERM_BP_ALL          | <a href="#">pattern specification process</a>               | RT       |  |  |  |  | 25    | 2.3E-1  | 9.6E-1    |
| <input type="checkbox"/> | GOTERM_BP_ALL          | <a href="#">anterior/posterior pattern formation</a>        | RT       |  |  |  |  | 10    | 4.1E-1  | 9.9E-1    |
|                          | Annotation Cluster 121 | Enrichment Score: 0.57                                      | <b>G</b> |  |  |  |  | Count | P_Value | Benjamini |
| <input type="checkbox"/> | SP_PIR_KEYWORDS        | <a href="#">TPR repeat</a>                                  | RT       |  |  |  |  | 16    | 5.4E-2  | 7.0E-1    |
| <input type="checkbox"/> | INTERPRO               | <a href="#">Tetratricopeptide region</a>                    | RT       |  |  |  |  | 14    | 7.5E-2  | 1.0E0     |
| <input type="checkbox"/> | INTERPRO               | <a href="#">Tetratricopeptide-like helical</a>              | RT       |  |  |  |  | 14    | 1.5E-1  | 1.0E0     |
| <input type="checkbox"/> | SMART                  | <a href="#">TPR</a>                                         | RT       |  |  |  |  | 14    | 1.8E-1  | 9.0E-1    |
| <input type="checkbox"/> | INTERPRO               | <a href="#">Tetratricopeptide TPR-1</a>                     | RT       |  |  |  |  | 10    | 2.2E-1  | 1.0E0     |
| <input type="checkbox"/> | UP_SEQ_FEATURE         | repeat:TPR 3                                                | RT       |  |  |  |  | 7     | 3.2E-1  | 1.0E0     |
| <input type="checkbox"/> | UP_SEQ_FEATURE         | repeat:TPR 1                                                | RT       |  |  |  |  | 7     | 3.9E-1  | 1.0E0     |
| <input type="checkbox"/> | UP_SEQ_FEATURE         | repeat:TPR 2                                                | RT       |  |  |  |  | 7     | 3.9E-1  | 1.0E0     |
| <input type="checkbox"/> | UP_SEQ_FEATURE         | repeat:TPR 4                                                | RT       |  |  |  |  | 5     | 3.9E-1  | 1.0E0     |
| <input type="checkbox"/> | UP_SEQ_FEATURE         | repeat:TPR 7                                                | RT       |  |  |  |  | 4     | 4.1E-1  | 1.0E0     |
| <input type="checkbox"/> | INTERPRO               | <a href="#">Tetratricopeptide TPR2</a>                      | RT       |  |  |  |  | 6     | 4.5E-1  | 1.0E0     |
| <input type="checkbox"/> | UP_SEQ_FEATURE         | repeat:TPR 6                                                | RT       |  |  |  |  | 4     | 4.5E-1  | 1.0E0     |
| <input type="checkbox"/> | UP_SEQ_FEATURE         | repeat:TPR 5                                                | RT       |  |  |  |  | 4     | 4.8E-1  | 1.0E0     |
| <input type="checkbox"/> | UP_SEQ_FEATURE         | repeat:TPR 8                                                | RT       |  |  |  |  | 3     | 5.1E-1  | 1.0E0     |
|                          | Annotation Cluster 122 | Enrichment Score: 0.56                                      | <b>G</b> |  |  |  |  | Count | P_Value | Benjamini |
| <input type="checkbox"/> | GOTERM_MF_ALL          | <a href="#">selenium binding</a>                            | RT       |  |  |  |  | 6     | 1.1E-1  | 9.9E-1    |
| <input type="checkbox"/> | SP_PIR_KEYWORDS        | <a href="#">selenium</a>                                    | RT       |  |  |  |  | 4     | 3.3E-1  | 9.7E-1    |
| <input type="checkbox"/> | SP_PIR_KEYWORDS        | <a href="#">selenocysteine</a>                              | RT       |  |  |  |  | 3     | 5.7E-1  | 1.0E0     |
|                          | Annotation Cluster 123 | Enrichment Score: 0.56                                      | <b>G</b> |  |  |  |  | Count | P_Value | Benjamini |
| <input type="checkbox"/> | INTERPRO               | <a href="#">Spectrin repeat</a>                             | RT       |  |  |  |  | 7     | 4.5E-2  | 1.0E0     |
| <input type="checkbox"/> | INTERPRO               | <a href="#">Actin-binding, actinin-type</a>                 | RT       |  |  |  |  | 6     | 6.7E-2  | 1.0E0     |
| <input type="checkbox"/> | SMART                  | <a href="#">SPEC</a>                                        | RT       |  |  |  |  | 7     | 6.8E-2  | 8.8E-1    |
| <input type="checkbox"/> | GOTERM_CC_ALL          | <a href="#">sarcomere</a>                                   | RT       |  |  |  |  | 5     | 8.5E-1  | 1.0E0     |
| <input type="checkbox"/> | GOTERM_CC_ALL          | <a href="#">contractile fiber part</a>                      | RT       |  |  |  |  | 5     | 8.7E-1  | 1.0E0     |
| <input type="checkbox"/> | GOTERM_CC_ALL          | <a href="#">myofibril</a>                                   | RT       |  |  |  |  | 5     | 9.1E-1  | 1.0E0     |
| <input type="checkbox"/> | GOTERM_CC_ALL          | <a href="#">contractile fiber</a>                           | RT       |  |  |  |  | 5     | 9.2E-1  | 1.0E0     |
|                          | Annotation Cluster 124 | Enrichment Score: 0.55                                      | <b>G</b> |  |  |  |  | Count | P_Value | Benjamini |
| <input type="checkbox"/> | GOTERM_BP_ALL          | <a href="#">amino acid and derivative metabolic process</a> | RT       |  |  |  |  | 35    | 1.7E-1  | 9.4E-1    |
| <input type="checkbox"/> | GOTERM_BP_ALL          | <a href="#">amino acid metabolic process</a>                | RT       |  |  |  |  | 28    | 1.8E-1  | 9.5E-1    |
| <input type="checkbox"/> | GOTERM_BP_ALL          | <a href="#">nitrogen compound metabolic process</a>         | RT       |  |  |  |  | 42    | 2.2E-1  | 9.6E-1    |
| <input type="checkbox"/> | GOTERM_BP_ALL          | <a href="#">amine metabolic process</a>                     | RT       |  |  |  |  | 38    | 2.8E-1  | 9.7E-1    |
| <input type="checkbox"/> | GOTERM_BP_ALL          | <a href="#">carboxylic acid metabolic process</a>           | RT       |  |  |  |  | 48    | 3.2E-1  | 9.8E-1    |
| <input type="checkbox"/> | GOTERM_BP_ALL          | <a href="#">organic acid metabolic process</a>              | RT       |  |  |  |  | 48    | 3.3E-1  | 9.8E-1    |
| <input type="checkbox"/> | GOTERM_BP_ALL          | <a href="#">monocarboxylic acid metabolic process</a>       | RT       |  |  |  |  | 19    | 6.9E-1  | 1.0E0     |

| Annotation Cluster 125   |                 | Enrichment Score: 0.54                                               |                    | G                                                                                   |    | Count | P_Value | Benjamini |
|--------------------------|-----------------|----------------------------------------------------------------------|--------------------|-------------------------------------------------------------------------------------|---------------------------------------------------------------------------------------|-------|---------|-----------|
| <input type="checkbox"/> | GOTERM_CC_ALL   | <a href="#">viral capsid</a>                                         | <a href="#">RT</a> |    |                                                                                       | 4     | 2.6E-1  | 9.9E-1    |
| <input type="checkbox"/> | GOTERM_CC_ALL   | <a href="#">virion</a>                                               | <a href="#">RT</a> |    |                                                                                       | 4     | 3.0E-1  | 1.0E0     |
| <input type="checkbox"/> | GOTERM_CC_ALL   | <a href="#">virion part</a>                                          | <a href="#">RT</a> |    |                                                                                       | 4     | 3.0E-1  | 1.0E0     |
| Annotation Cluster 126   |                 | Enrichment Score: 0.52                                               |                    | G                                                                                   |    | Count | P_Value | Benjamini |
| <input type="checkbox"/> | GOTERM_BP_ALL   | <a href="#">negative regulation of growth</a>                        | <a href="#">RT</a> |    |                                                                                       | 7     | 1.4E-1  | 9.2E-1    |
| <input type="checkbox"/> | GOTERM_BP_ALL   | <a href="#">regulation of cell growth</a>                            | <a href="#">RT</a> |    |                                                                                       | 12    | 2.9E-1  | 9.8E-1    |
| <input type="checkbox"/> | GOTERM_BP_ALL   | <a href="#">negative regulation of cell growth</a>                   | <a href="#">RT</a> |    |                                                                                       | 4     | 3.9E-1  | 9.9E-1    |
| <input type="checkbox"/> | GOTERM_BP_ALL   | <a href="#">negative regulation of cell size</a>                     | <a href="#">RT</a> |    |                                                                                       | 4     | 5.1E-1  | 1.0E0     |
| Annotation Cluster 127   |                 | Enrichment Score: 0.52                                               |                    | G                                                                                   |    | Count | P_Value | Benjamini |
| <input type="checkbox"/> | SP_PIR_KEYWORDS | <a href="#">steroid metabolism</a>                                   | <a href="#">RT</a> |    |                                                                                       | 6     | 1.6E-1  | 8.8E-1    |
| <input type="checkbox"/> | GOTERM_BP_ALL   | <a href="#">cholesterol metabolic process</a>                        | <a href="#">RT</a> |    |                                                                                       | 9     | 2.7E-1  | 9.7E-1    |
| <input type="checkbox"/> | SP_PIR_KEYWORDS | <a href="#">cholesterol metabolism</a>                               | <a href="#">RT</a> |    |                                                                                       | 4     | 3.6E-1  | 9.8E-1    |
| <input type="checkbox"/> | GOTERM_BP_ALL   | <a href="#">sterol metabolic process</a>                             | <a href="#">RT</a> |    |                                                                                       | 9     | 3.6E-1  | 9.9E-1    |
| <input type="checkbox"/> | GOTERM_BP_ALL   | <a href="#">steroid metabolic process</a>                            | <a href="#">RT</a> |    |                                                                                       | 15    | 4.7E-1  | 1.0E0     |
| Annotation Cluster 128   |                 | Enrichment Score: 0.52                                               |                    | G                                                                                   |    | Count | P_Value | Benjamini |
| <input type="checkbox"/> | GOTERM_BP_ALL   | <a href="#">cholesterol transport</a>                                | <a href="#">RT</a> |    |                                                                                       | 4     | 2.2E-1  | 9.6E-1    |
| <input type="checkbox"/> | GOTERM_BP_ALL   | <a href="#">sterol transport</a>                                     | <a href="#">RT</a> |    |                                                                                       | 4     | 2.5E-1  | 9.6E-1    |
| <input type="checkbox"/> | GOTERM_BP_ALL   | <a href="#">lipid transport</a>                                      | <a href="#">RT</a> |    |                                                                                       | 9     | 5.1E-1  | 1.0E0     |
| Annotation Cluster 129   |                 | Enrichment Score: 0.52                                               |                    | G                                                                                   |    | Count | P_Value | Benjamini |
| <input type="checkbox"/> | GOTERM_MF_ALL   | <a href="#">UDP-galactosyltransferase activity</a>                   | <a href="#">RT</a> |    |                                                                                       | 4     | 2.0E-1  | 1.0E0     |
| <input type="checkbox"/> | GOTERM_MF_ALL   | <a href="#">UDP-glycosyltransferase activity</a>                     | <a href="#">RT</a> |    |                                                                                       | 11    | 3.2E-1  | 1.0E0     |
| <input type="checkbox"/> | GOTERM_MF_ALL   | <a href="#">galactosyltransferase activity</a>                       | <a href="#">RT</a> |    |                                                                                       | 4     | 4.6E-1  | 1.0E0     |
| Annotation Cluster 130   |                 | Enrichment Score: 0.51                                               |                    | G                                                                                   |    | Count | P_Value | Benjamini |
| <input type="checkbox"/> | GOTERM_CC_ALL   | <a href="#">myelin sheath</a>                                        | <a href="#">RT</a> |    |                                                                                       | 3     | 5.9E-2  | 8.8E-1    |
| <input type="checkbox"/> | GOTERM_BP_ALL   | <a href="#">myelination</a>                                          | <a href="#">RT</a> |   |                                                                                       | 5     | 2.8E-1  | 9.8E-1    |
| <input type="checkbox"/> | GOTERM_BP_ALL   | <a href="#">ensheathment of neurons</a>                              | <a href="#">RT</a> |  |                                                                                       | 5     | 3.2E-1  | 9.8E-1    |
| <input type="checkbox"/> | GOTERM_BP_ALL   | <a href="#">axon ensheathment</a>                                    | <a href="#">RT</a> |  |                                                                                       | 5     | 3.2E-1  | 9.8E-1    |
| <input type="checkbox"/> | GOTERM_BP_ALL   | <a href="#">regulation of action potential</a>                       | <a href="#">RT</a> |  |                                                                                       | 5     | 5.3E-1  | 1.0E0     |
| <input type="checkbox"/> | GOTERM_BP_ALL   | <a href="#">transmission of nerve impulse</a>                        | <a href="#">RT</a> |  |                                                                                       | 15    | 9.8E-1  | 1.0E0     |
| Annotation Cluster 131   |                 | Enrichment Score: 0.5                                                |                    | G                                                                                   |  | Count | P_Value | Benjamini |
| <input type="checkbox"/> | GOTERM_BP_ALL   | <a href="#">membrane lipid biosynthetic process</a>                  | <a href="#">RT</a> |  |                                                                                       | 11    | 1.7E-1  | 9.4E-1    |
| <input type="checkbox"/> | GOTERM_BP_ALL   | <a href="#">cellular lipid metabolic process</a>                     | <a href="#">RT</a> |  |                                                                                       | 53    | 2.6E-1  | 9.7E-1    |
| <input type="checkbox"/> | GOTERM_BP_ALL   | <a href="#">membrane lipid metabolic process</a>                     | <a href="#">RT</a> |  |                                                                                       | 19    | 2.6E-1  | 9.7E-1    |
| <input type="checkbox"/> | GOTERM_BP_ALL   | <a href="#">glycerophospholipid metabolic process</a>                | <a href="#">RT</a> |  |                                                                                       | 9     | 2.7E-1  | 9.7E-1    |
| <input type="checkbox"/> | GOTERM_BP_ALL   | <a href="#">phospholipid metabolic process</a>                       | <a href="#">RT</a> |  |                                                                                       | 15    | 2.8E-1  | 9.7E-1    |
| <input type="checkbox"/> | GOTERM_BP_ALL   | <a href="#">phospholipid biosynthetic process</a>                    | <a href="#">RT</a> |  |                                                                                       | 8     | 3.6E-1  | 9.9E-1    |
| <input type="checkbox"/> | GOTERM_BP_ALL   | <a href="#">lipid metabolic process</a>                              | <a href="#">RT</a> |  |                                                                                       | 58    | 4.0E-1  | 9.9E-1    |
| <input type="checkbox"/> | GOTERM_BP_ALL   | <a href="#">lipid biosynthetic process</a>                           | <a href="#">RT</a> |  |                                                                                       | 20    | 7.7E-1  | 1.0E0     |
| Annotation Cluster 132   |                 | Enrichment Score: 0.49                                               |                    | G                                                                                   |  | Count | P_Value | Benjamini |
| <input type="checkbox"/> | GOTERM_BP_ALL   | <a href="#">flagellum biogenesis</a>                                 | <a href="#">RT</a> |  |                                                                                       | 3     | 8.8E-2  | 8.6E-1    |
| <input type="checkbox"/> | GOTERM_BP_ALL   | <a href="#">flagellum organization and biogenesis</a>                | <a href="#">RT</a> |  |                                                                                       | 3     | 1.2E-1  | 9.0E-1    |
| <input type="checkbox"/> | GOTERM_BP_ALL   | <a href="#">spermatid development</a>                                | <a href="#">RT</a> |  |                                                                                       | 5     | 4.2E-1  | 9.9E-1    |
| <input type="checkbox"/> | GOTERM_BP_ALL   | <a href="#">spermatid differentiation</a>                            | <a href="#">RT</a> |  |                                                                                       | 5     | 4.6E-1  | 9.9E-1    |
| <input type="checkbox"/> | GOTERM_BP_ALL   | <a href="#">cell projection biogenesis</a>                           | <a href="#">RT</a> |  |                                                                                       | 5     | 7.6E-1  | 1.0E0     |
| <input type="checkbox"/> | GOTERM_BP_ALL   | <a href="#">microtubule cytoskeleton organization and biogenesis</a> | <a href="#">RT</a> |  |                                                                                       | 6     | 8.0E-1  | 1.0E0     |
| Annotation Cluster 133   |                 | Enrichment Score: 0.48                                               |                    | G                                                                                   |  | Count | P_Value | Benjamini |
| <input type="checkbox"/> | GOTERM_BP_ALL   | <a href="#">glutamine family amino acid metabolic process</a>        | <a href="#">RT</a> |  |                                                                                       | 6     | 2.1E-1  | 9.6E-1    |
| <input type="checkbox"/> | GOTERM_BP_ALL   | <a href="#">glutamine metabolic process</a>                          | <a href="#">RT</a> |  |                                                                                       | 4     | 2.2E-1  | 9.6E-1    |
| <input type="checkbox"/> | KEGG_PATHWAY    | <a href="#">Glutamate metabolism</a>                                 | <a href="#">RT</a> |  |                                                                                       | 3     | 7.9E-1  | 9.8E-1    |

| Annotation Cluster 134   |                 | Enrichment Score: 0.47                                                  | G  |    | Count | P_Value | Benjamini |
|--------------------------|-----------------|-------------------------------------------------------------------------|----|---------------------------------------------------------------------------------------|-------|---------|-----------|
| <input type="checkbox"/> | GOTERM_BP_ALL   | <a href="#">adrenal gland development</a>                               | RT |      | 3     | 2.1E-1  | 9.6E-1    |
| <input type="checkbox"/> | GOTERM_BP_ALL   | <a href="#">gland development</a>                                       | RT |      | 9     | 2.8E-1  | 9.7E-1    |
| <input type="checkbox"/> | GOTERM_BP_ALL   | <a href="#">endocrine system development</a>                            | RT |      | 5     | 6.5E-1  | 1.0E0     |
| Annotation Cluster 135   |                 | Enrichment Score: 0.47                                                  | G  |    | Count | P_Value | Benjamini |
| <input type="checkbox"/> | INTERPRO        | <a href="#">Butyrophilin-like</a>                                       | RT |      | 7     | 1.4E-1  | 1.0E0     |
| <input type="checkbox"/> | INTERPRO        | <a href="#">Zinc finger, B-box</a>                                      | RT |      | 8     | 2.0E-1  | 1.0E0     |
| <input type="checkbox"/> | UP_SEQ_FEATURE  | zinc finger region:B box-type                                           | RT |      | 5     | 2.1E-1  | 1.0E0     |
| <input type="checkbox"/> | INTERPRO        | <a href="#">SP1a/RYanodine receptor SPRY</a>                            | RT |      | 8     | 2.5E-1  | 1.0E0     |
| <input type="checkbox"/> | SMART           | <a href="#">BBOX</a>                                                    | RT |      | 8     | 2.8E-1  | 9.6E-1    |
| <input type="checkbox"/> | INTERPRO        | <a href="#">B302, (SPRY)-like</a>                                       | RT |      | 8     | 2.8E-1  | 1.0E0     |
| <input type="checkbox"/> | UP_SEQ_FEATURE  | domain:B30.2/SPRY                                                       | RT |      | 4     | 4.1E-1  | 1.0E0     |
| <input type="checkbox"/> | SMART           | <a href="#">SPRY</a>                                                    | RT |      | 8     | 4.2E-1  | 9.8E-1    |
| <input type="checkbox"/> | PIR_SUPERFAMILY | PIRSF001733:rfp transforming protein                                    | RT |      | 4     | 5.4E-1  | 1.0E0     |
| <input type="checkbox"/> | INTERPRO        | <a href="#">SPRY-associated</a>                                         | RT |      | 3     | 7.6E-1  | 1.0E0     |
| <input type="checkbox"/> | SMART           | <a href="#">PRY</a>                                                     | RT |      | 3     | 8.5E-1  | 1.0E0     |
| Annotation Cluster 136   |                 | Enrichment Score: 0.47                                                  | G  |    | Count | P_Value | Benjamini |
| <input type="checkbox"/> | GOTERM_MF_ALL   | <a href="#">cytokine binding</a>                                        | RT |      | 12    | 1.1E-1  | 9.9E-1    |
| <input type="checkbox"/> | GOTERM_MF_ALL   | <a href="#">interleukin receptor activity</a>                           | RT |      | 5     | 3.9E-1  | 1.0E0     |
| <input type="checkbox"/> | GOTERM_MF_ALL   | <a href="#">interleukin binding</a>                                     | RT |      | 5     | 5.3E-1  | 1.0E0     |
| <input type="checkbox"/> | SP_PIR_KEYWORDS | <a href="#">cytokine receptor</a>                                       | RT |      | 3     | 5.9E-1  | 1.0E0     |
| Annotation Cluster 137   |                 | Enrichment Score: 0.46                                                  | G  |    | Count | P_Value | Benjamini |
| <input type="checkbox"/> | GOTERM_BP_ALL   | <a href="#">regulation of multicellular organism growth</a>             | RT |      | 9     | 8.2E-2  | 8.6E-1    |
| <input type="checkbox"/> | GOTERM_BP_ALL   | <a href="#">positive regulation of multicellular organism growth</a>    | RT |      | 3     | 6.3E-1  | 1.0E0     |
| <input type="checkbox"/> | GOTERM_BP_ALL   | <a href="#">positive regulation of growth</a>                           | RT |     | 3     | 8.0E-1  | 1.0E0     |
| Annotation Cluster 138   |                 | Enrichment Score: 0.46                                                  | G  |  | Count | P_Value | Benjamini |
| <input type="checkbox"/> | GOTERM_BP_ALL   | <a href="#">mRNA catabolic process, deadenylation-dependent decay</a>   | RT |    | 3     | 1.2E-1  | 9.0E-1    |
| <input type="checkbox"/> | GOTERM_BP_ALL   | <a href="#">regulation of mRNA stability</a>                            | RT |    | 3     | 2.8E-1  | 9.7E-1    |
| <input type="checkbox"/> | GOTERM_BP_ALL   | <a href="#">regulation of RNA stability</a>                             | RT |    | 3     | 3.4E-1  | 9.8E-1    |
| <input type="checkbox"/> | GOTERM_BP_ALL   | <a href="#">regulation of RNA metabolic process</a>                     | RT |    | 3     | 4.7E-1  | 1.0E0     |
| <input type="checkbox"/> | GOTERM_BP_ALL   | <a href="#">mRNA catabolic process</a>                                  | RT |    | 4     | 5.3E-1  | 1.0E0     |
| <input type="checkbox"/> | GOTERM_BP_ALL   | <a href="#">RNA catabolic process</a>                                   | RT |    | 4     | 6.5E-1  | 1.0E0     |
| Annotation Cluster 139   |                 | Enrichment Score: 0.46                                                  | G  |  | Count | P_Value | Benjamini |
| <input type="checkbox"/> | GOTERM_MF_ALL   | <a href="#">Rab GTPase binding</a>                                      | RT |    | 5     | 8.6E-2  | 9.8E-1    |
| <input type="checkbox"/> | GOTERM_MF_ALL   | <a href="#">Ras GTPase binding</a>                                      | RT |    | 6     | 5.1E-1  | 1.0E0     |
| <input type="checkbox"/> | GOTERM_MF_ALL   | <a href="#">small GTPase binding</a>                                    | RT |    | 6     | 5.6E-1  | 1.0E0     |
| <input type="checkbox"/> | GOTERM_MF_ALL   | <a href="#">GTPase binding</a>                                          | RT |    | 6     | 6.1E-1  | 1.0E0     |
| Annotation Cluster 140   |                 | Enrichment Score: 0.45                                                  | G  |  | Count | P_Value | Benjamini |
| <input type="checkbox"/> | PIR_SUPERFAMILY | PIRSF000615:tyrosine-protein kinase, CSF-1/PDGF receptor type           | RT |    | 4     | 1.1E-2  | 1.0E0     |
| <input type="checkbox"/> | INTERPRO        | <a href="#">Receptor tyrosine kinase, class III, conserved region</a>   | RT |    | 4     | 4.8E-2  | 1.0E0     |
| <input type="checkbox"/> | UP_SEQ_FEATURE  | domain:Ig-like C2-type 2                                                | RT |    | 12    | 1.3E-1  | 1.0E0     |
| <input type="checkbox"/> | UP_SEQ_FEATURE  | domain:Ig-like C2-type 1                                                | RT |    | 12    | 1.3E-1  | 1.0E0     |
| <input type="checkbox"/> | SP_PIR_KEYWORDS | <a href="#">tyrosine-specific protein kinase</a>                        | RT |    | 7     | 2.2E-1  | 9.3E-1    |
| <input type="checkbox"/> | UP_SEQ_FEATURE  | domain:Ig-like C2-type 3                                                | RT |    | 8     | 3.0E-1  | 1.0E0     |
| <input type="checkbox"/> | GOTERM_MF_ALL   | <a href="#">transmembrane receptor protein tyrosine kinase activity</a> | RT |    | 8     | 4.5E-1  | 1.0E0     |
| <input type="checkbox"/> | INTERPRO        | <a href="#">Immunoglobulin-like fold</a>                                | RT |    | 34    | 5.3E-1  | 1.0E0     |
| <input type="checkbox"/> | UP_SEQ_FEATURE  | domain:Ig-like C2-type 5                                                | RT |    | 4     | 5.7E-1  | 1.0E0     |
| <input type="checkbox"/> | INTERPRO        | <a href="#">Immunoglobulin</a>                                          | RT |    | 15    | 5.7E-1  | 1.0E0     |

|                          |                 |                                                                                     |                    |  |       |         |           |
|--------------------------|-----------------|-------------------------------------------------------------------------------------|--------------------|--|-------|---------|-----------|
| <input type="checkbox"/> | UP_SEQ_FEATURE  | domain:Ig-like C2-type 4                                                            | <a href="#">RT</a> |  | 4     | 6.5E-1  | 1.0E0     |
| <input type="checkbox"/> | INTERPRO        | <a href="#">Immunoglobulin V-set</a>                                                | <a href="#">RT</a> |  | 14    | 6.6E-1  | 1.0E0     |
| <input type="checkbox"/> | INTERPRO        | <a href="#">Immunoglobulin subtype</a>                                              | <a href="#">RT</a> |  | 18    | 7.4E-1  | 1.0E0     |
| <input type="checkbox"/> | SMART           | <a href="#">IG</a>                                                                  | <a href="#">RT</a> |  | 21    | 8.3E-1  | 1.0E0     |
| <input type="checkbox"/> | INTERPRO        | <a href="#">Immunoglobulin-like</a>                                                 | <a href="#">RT</a> |  | 27    | 8.4E-1  | 1.0E0     |
| <input type="checkbox"/> | SP_PIR_KEYWORDS | <a href="#">immunoglobulin domain</a>                                               | <a href="#">RT</a> |  | 26    | 8.6E-1  | 1.0E0     |
| <input type="checkbox"/> | INTERPRO        | <a href="#">Immunoglobulin subtype 2</a>                                            | <a href="#">RT</a> |  | 9     | 9.7E-1  | 1.0E0     |
| <input type="checkbox"/> | SMART           | <a href="#">IGc2</a>                                                                | <a href="#">RT</a> |  | 10    | 9.8E-1  | 1.0E0     |
| Annotation Cluster 141   |                 | Enrichment Score: 0.45                                                              | <b>G</b>           |  | Count | P_Value | Benjamini |
| <input type="checkbox"/> | INTERPRO        | <a href="#">Guanylate kinase</a>                                                    | <a href="#">RT</a> |  | 4     | 2.7E-1  | 1.0E0     |
| <input type="checkbox"/> | INTERPRO        | <a href="#">Guanylate kinase/L-type calcium channel region</a>                      | <a href="#">RT</a> |  | 4     | 3.4E-1  | 1.0E0     |
| <input type="checkbox"/> | SMART           | <a href="#">GuKc</a>                                                                | <a href="#">RT</a> |  | 4     | 4.0E-1  | 9.8E-1    |
| <input type="checkbox"/> | UP_SEQ_FEATURE  | domain:Guanylate kinase-like                                                        | <a href="#">RT</a> |  | 3     | 4.5E-1  | 1.0E0     |
| Annotation Cluster 142   |                 | Enrichment Score: 0.44                                                              | <b>G</b>           |  | Count | P_Value | Benjamini |
| <input type="checkbox"/> | GOTERM_BP_ALL   | <a href="#">homeostatic process</a>                                                 | <a href="#">RT</a> |  | 43    | 3.8E-2  | 7.0E-1    |
| <input type="checkbox"/> | GOTERM_BP_ALL   | <a href="#">cation homeostasis</a>                                                  | <a href="#">RT</a> |  | 15    | 1.7E-1  | 9.5E-1    |
| <input type="checkbox"/> | GOTERM_BP_ALL   | <a href="#">di-, tri-valent inorganic cation homeostasis</a>                        | <a href="#">RT</a> |  | 13    | 2.3E-1  | 9.6E-1    |
| <input type="checkbox"/> | GOTERM_BP_ALL   | <a href="#">cellular cation homeostasis</a>                                         | <a href="#">RT</a> |  | 14    | 2.3E-1  | 9.7E-1    |
| <input type="checkbox"/> | GOTERM_BP_ALL   | <a href="#">cellular homeostasis</a>                                                | <a href="#">RT</a> |  | 26    | 2.8E-1  | 9.7E-1    |
| <input type="checkbox"/> | GOTERM_BP_ALL   | <a href="#">cellular di-, tri-valent inorganic cation homeostasis</a>               | <a href="#">RT</a> |  | 12    | 3.0E-1  | 9.8E-1    |
| <input type="checkbox"/> | GOTERM_BP_ALL   | <a href="#">chemical homeostasis</a>                                                | <a href="#">RT</a> |  | 24    | 3.3E-1  | 9.8E-1    |
| <input type="checkbox"/> | GOTERM_BP_ALL   | <a href="#">ion homeostasis</a>                                                     | <a href="#">RT</a> |  | 19    | 4.3E-1  | 9.9E-1    |
| <input type="checkbox"/> | GOTERM_BP_ALL   | <a href="#">cellular ion homeostasis</a>                                            | <a href="#">RT</a> |  | 17    | 4.6E-1  | 9.9E-1    |
| <input type="checkbox"/> | GOTERM_BP_ALL   | <a href="#">cellular chemical homeostasis</a>                                       | <a href="#">RT</a> |  | 17    | 4.6E-1  | 9.9E-1    |
| <input type="checkbox"/> | GOTERM_BP_ALL   | <a href="#">elevation of cytosolic calcium ion concentration</a>                    | <a href="#">RT</a> |  | 3     | 5.8E-1  | 1.0E0     |
| <input type="checkbox"/> | GOTERM_BP_ALL   | <a href="#">cytosolic calcium ion homeostasis</a>                                   | <a href="#">RT</a> |  | 3     | 6.3E-1  | 1.0E0     |
| <input type="checkbox"/> | GOTERM_BP_ALL   | <a href="#">cellular metal ion homeostasis</a>                                      | <a href="#">RT</a> |  | 7     | 6.7E-1  | 1.0E0     |
| <input type="checkbox"/> | GOTERM_BP_ALL   | <a href="#">metal ion homeostasis</a>                                               | <a href="#">RT</a> |  | 7     | 7.0E-1  | 1.0E0     |
| <input type="checkbox"/> | GOTERM_BP_ALL   | <a href="#">cellular calcium ion homeostasis</a>                                    | <a href="#">RT</a> |  | 6     | 7.2E-1  | 1.0E0     |
| <input type="checkbox"/> | GOTERM_BP_ALL   | <a href="#">calcium ion homeostasis</a>                                             | <a href="#">RT</a> |  | 6     | 7.4E-1  | 1.0E0     |
| Annotation Cluster 143   |                 | Enrichment Score: 0.44                                                              | <b>G</b>           |  | Count | P_Value | Benjamini |
| <input type="checkbox"/> | INTERPRO        | <a href="#">Guanine-nucleotide dissociation stimulator CDC25</a>                    | <a href="#">RT</a> |  | 5     | 1.6E-1  | 1.0E0     |
| <input type="checkbox"/> | SMART           | <a href="#">RasGEF</a>                                                              | <a href="#">RT</a> |  | 5     | 2.1E-1  | 9.2E-1    |
| <input type="checkbox"/> | INTERPRO        | <a href="#">Ras guanine nucleotide exchange factor</a>                              | <a href="#">RT</a> |  | 4     | 4.4E-1  | 1.0E0     |
| <input type="checkbox"/> | INTERPRO        | <a href="#">Guanine nucleotide exchange factor for Ras-like GTPases, N-terminal</a> | <a href="#">RT</a> |  | 3     | 6.4E-1  | 1.0E0     |
| <input type="checkbox"/> | SMART           | <a href="#">RasGEFN</a>                                                             | <a href="#">RT</a> |  | 3     | 7.0E-1  | 1.0E0     |
| Annotation Cluster 144   |                 | Enrichment Score: 0.43                                                              | <b>G</b>           |  | Count | P_Value | Benjamini |
| <input type="checkbox"/> | UP_SEQ_FEATURE  | repeat:ANK 1                                                                        | <a href="#">RT</a> |  | 11    | 2.8E-1  | 1.0E0     |
| <input type="checkbox"/> | UP_SEQ_FEATURE  | repeat:ANK 2                                                                        | <a href="#">RT</a> |  | 11    | 2.8E-1  | 1.0E0     |
| <input type="checkbox"/> | UP_SEQ_FEATURE  | repeat:ANK 9                                                                        | <a href="#">RT</a> |  | 3     | 2.9E-1  | 1.0E0     |
| <input type="checkbox"/> | UP_SEQ_FEATURE  | repeat:ANK 7                                                                        | <a href="#">RT</a> |  | 4     | 3.1E-1  | 1.0E0     |
| <input type="checkbox"/> | UP_SEQ_FEATURE  | repeat:ANK 8                                                                        | <a href="#">RT</a> |  | 3     | 3.2E-1  | 1.0E0     |
| <input type="checkbox"/> | SP_PIR_KEYWORDS | <a href="#">ank repeat</a>                                                          | <a href="#">RT</a> |  | 19    | 3.3E-1  | 9.7E-1    |
| <input type="checkbox"/> | UP_SEQ_FEATURE  | repeat:ANK 5                                                                        | <a href="#">RT</a> |  | 7     | 3.4E-1  | 1.0E0     |
| <input type="checkbox"/> | UP_SEQ_FEATURE  | repeat:ANK 3                                                                        | <a href="#">RT</a> |  | 9     | 3.8E-1  | 1.0E0     |
| <input type="checkbox"/> | INTERPRO        | <a href="#">Ankyrin</a>                                                             | <a href="#">RT</a> |  | 18    | 3.8E-1  | 1.0E0     |
| <input type="checkbox"/> | UP_SEQ_FEATURE  | repeat:ANK 4                                                                        | <a href="#">RT</a> |  | 7     | 4.7E-1  | 1.0E0     |

| <input type="checkbox"/> | SMART                  | <a href="#">ANK</a>                                                                                                                           | <a href="#">RT</a> |  | 20    | 5.5E-1  | 9.9E-1    |
|--------------------------|------------------------|-----------------------------------------------------------------------------------------------------------------------------------------------|--------------------|--|-------|---------|-----------|
| <input type="checkbox"/> | UP_SEQ_FEATURE         | repeat:ANK 6                                                                                                                                  | <a href="#">RT</a> |  | 4     | 6.6E-1  | 1.0E0     |
|                          | Annotation Cluster 145 | Enrichment Score: 0.43                                                                                                                        | <b>G</b>           |  | Count | P_Value | Benjamini |
| <input type="checkbox"/> | GOTERM_BP_ALL          | <a href="#">lymphocyte homeostasis</a>                                                                                                        | <a href="#">RT</a> |  | 4     | 2.7E-1  | 9.7E-1    |
| <input type="checkbox"/> | GOTERM_BP_ALL          | <a href="#">regulation of B cell activation</a>                                                                                               | <a href="#">RT</a> |  | 6     | 3.3E-1  | 9.8E-1    |
| <input type="checkbox"/> | GOTERM_BP_ALL          | <a href="#">leukocyte homeostasis</a>                                                                                                         | <a href="#">RT</a> |  | 4     | 4.4E-1  | 9.9E-1    |
| <input type="checkbox"/> | GOTERM_BP_ALL          | <a href="#">homeostasis of number of cells</a>                                                                                                | <a href="#">RT</a> |  | 4     | 4.8E-1  | 1.0E0     |
|                          | Annotation Cluster 146 | Enrichment Score: 0.43                                                                                                                        | <b>G</b>           |  | Count | P_Value | Benjamini |
| <input type="checkbox"/> | SP_PIR_KEYWORDS        | <a href="#">synaptosome</a>                                                                                                                   | <a href="#">RT</a> |  | 5     | 1.4E-1  | 8.7E-1    |
| <input type="checkbox"/> | GOTERM_CC_ALL          | <a href="#">synaptosome</a>                                                                                                                   | <a href="#">RT</a> |  | 6     | 4.9E-1  | 1.0E0     |
| <input type="checkbox"/> | SP_PIR_KEYWORDS        | <a href="#">synapse</a>                                                                                                                       | <a href="#">RT</a> |  | 13    | 7.4E-1  | 1.0E0     |
|                          | Annotation Cluster 147 | Enrichment Score: 0.42                                                                                                                        | <b>G</b>           |  | Count | P_Value | Benjamini |
| <input type="checkbox"/> | GOTERM_BP_ALL          | <a href="#">lymphocyte mediated immunity</a>                                                                                                  | <a href="#">RT</a> |  | 11    | 3.4E-1  | 9.8E-1    |
| <input type="checkbox"/> | GOTERM_BP_ALL          | <a href="#">leukocyte mediated cytotoxicity</a>                                                                                               | <a href="#">RT</a> |  | 4     | 3.4E-1  | 9.8E-1    |
| <input type="checkbox"/> | GOTERM_BP_ALL          | <a href="#">cell killing</a>                                                                                                                  | <a href="#">RT</a> |  | 4     | 3.7E-1  | 9.9E-1    |
| <input type="checkbox"/> | GOTERM_BP_ALL          | <a href="#">regulation of leukocyte mediated cytotoxicity</a>                                                                                 | <a href="#">RT</a> |  | 3     | 4.1E-1  | 9.9E-1    |
| <input type="checkbox"/> | GOTERM_BP_ALL          | <a href="#">regulation of cell killing</a>                                                                                                    | <a href="#">RT</a> |  | 3     | 4.1E-1  | 9.9E-1    |
| <input type="checkbox"/> | GOTERM_BP_ALL          | <a href="#">leukocyte mediated immunity</a>                                                                                                   | <a href="#">RT</a> |  | 11    | 4.1E-1  | 9.9E-1    |
|                          | Annotation Cluster 148 | Enrichment Score: 0.42                                                                                                                        | <b>G</b>           |  | Count | P_Value | Benjamini |
| <input type="checkbox"/> | SP_PIR_KEYWORDS        | <a href="#">SH3 domain</a>                                                                                                                    | <a href="#">RT</a> |  | 20    | 2.8E-1  | 9.6E-1    |
| <input type="checkbox"/> | UP_SEQ_FEATURE         | domain:SH3                                                                                                                                    | <a href="#">RT</a> |  | 13    | 3.0E-1  | 1.0E0     |
| <input type="checkbox"/> | INTERPRO               | <a href="#">Src homology-3</a>                                                                                                                | <a href="#">RT</a> |  | 18    | 4.2E-1  | 1.0E0     |
| <input type="checkbox"/> | SMART                  | <a href="#">SH3</a>                                                                                                                           | <a href="#">RT</a> |  | 19    | 5.7E-1  | 9.9E-1    |
|                          | Annotation Cluster 149 | Enrichment Score: 0.42                                                                                                                        | <b>G</b>           |  | Count | P_Value | Benjamini |
| <input type="checkbox"/> | GOTERM_BP_ALL          | <a href="#">hexose metabolic process</a>                                                                                                      | <a href="#">RT</a> |  | 17    | 2.2E-1  | 9.6E-1    |
| <input type="checkbox"/> | GOTERM_BP_ALL          | <a href="#">monosaccharide metabolic process</a>                                                                                              | <a href="#">RT</a> |  | 17    | 2.4E-1  | 9.7E-1    |
| <input type="checkbox"/> | GOTERM_BP_ALL          | <a href="#">glucose metabolic process</a>                                                                                                     | <a href="#">RT</a> |  | 12    | 3.7E-1  | 9.9E-1    |
| <input type="checkbox"/> | GOTERM_BP_ALL          | <a href="#">alcohol metabolic process</a>                                                                                                     | <a href="#">RT</a> |  | 27    | 4.0E-1  | 9.9E-1    |
| <input type="checkbox"/> | GOTERM_BP_ALL          | <a href="#">carbohydrate metabolic process</a>                                                                                                | <a href="#">RT</a> |  | 37    | 5.0E-1  | 1.0E0     |
| <input type="checkbox"/> | GOTERM_BP_ALL          | <a href="#">cellular carbohydrate metabolic process</a>                                                                                       | <a href="#">RT</a> |  | 22    | 8.0E-1  | 1.0E0     |
|                          | Annotation Cluster 150 | Enrichment Score: 0.42                                                                                                                        | <b>G</b>           |  | Count | P_Value | Benjamini |
| <input type="checkbox"/> | GOTERM_MF_ALL          | <a href="#">dioxygenase activity</a>                                                                                                          | <a href="#">RT</a> |  | 7     | 3.8E-1  | 1.0E0     |
| <input type="checkbox"/> | GOTERM_MF_ALL          | <a href="#">oxidoreductase activity, acting on single donors with incorporation of molecular oxygen, incorporation of two atoms of oxygen</a> | <a href="#">RT</a> |  | 7     | 3.8E-1  | 1.0E0     |
| <input type="checkbox"/> | GOTERM_MF_ALL          | <a href="#">oxidoreductase activity, acting on single donors with incorporation of molecular oxygen</a>                                       | <a href="#">RT</a> |  | 7     | 3.9E-1  | 1.0E0     |
|                          | Annotation Cluster 151 | Enrichment Score: 0.42                                                                                                                        | <b>G</b>           |  | Count | P_Value | Benjamini |
| <input type="checkbox"/> | INTERPRO               | <a href="#">Metal-dependent phosphohydrolase, HD region</a>                                                                                   | <a href="#">RT</a> |  | 4     | 2.7E-1  | 1.0E0     |
| <input type="checkbox"/> | GOTERM_MF_ALL          | <a href="#">3',5'-cyclic-nucleotide phosphodiesterase activity</a>                                                                            | <a href="#">RT</a> |  | 4     | 2.9E-1  | 1.0E0     |
| <input type="checkbox"/> | SMART                  | <a href="#">HDc</a>                                                                                                                           | <a href="#">RT</a> |  | 4     | 3.2E-1  | 9.6E-1    |
| <input type="checkbox"/> | GOTERM_MF_ALL          | <a href="#">cyclic-nucleotide phosphodiesterase activity</a>                                                                                  | <a href="#">RT</a> |  | 4     | 3.4E-1  | 1.0E0     |
| <input type="checkbox"/> | INTERPRO               | <a href="#">3'5'-cyclic nucleotide phosphodiesterase</a>                                                                                      | <a href="#">RT</a> |  | 3     | 4.6E-1  | 1.0E0     |
| <input type="checkbox"/> | GOTERM_MF_ALL          | <a href="#">phosphoric diester hydrolase activity</a>                                                                                         | <a href="#">RT</a> |  | 5     | 8.3E-1  | 1.0E0     |
|                          | Annotation Cluster 152 | Enrichment Score: 0.41                                                                                                                        | <b>G</b>           |  | Count | P_Value | Benjamini |
| <input type="checkbox"/> | GOTERM_BP_ALL          | <a href="#">platelet activation</a>                                                                                                           | <a href="#">RT</a> |  | 4     | 1.1E-1  | 9.0E-1    |
| <input type="checkbox"/> | GOTERM_BP_ALL          | <a href="#">hemostasis</a>                                                                                                                    | <a href="#">RT</a> |  | 8     | 3.0E-1  | 9.8E-1    |
| <input type="checkbox"/> | GOTERM_BP_ALL          | <a href="#">blood coagulation</a>                                                                                                             | <a href="#">RT</a> |  | 7     | 4.2E-1  | 9.9E-1    |
| <input type="checkbox"/> | GOTERM_BP_ALL          | <a href="#">coagulation</a>                                                                                                                   | <a href="#">RT</a> |  | 7     | 4.3E-1  | 9.9E-1    |
| <input type="checkbox"/> | SP_PIR_KEYWORDS        | <a href="#">blood coagulation</a>                                                                                                             | <a href="#">RT</a> |  | 4     | 5.4E-1  | 1.0E0     |

| <input type="checkbox"/> | Category        | Term                                                                 | RT                     |          | Count | P_Value | Benjamini |
|--------------------------|-----------------|----------------------------------------------------------------------|------------------------|----------|-------|---------|-----------|
| <input type="checkbox"/> | GOTERM_BP_ALL   | <a href="#">regulation of body fluid levels</a>                      | RT                     |          | 8     | 5.4E-1  | 1.0E0     |
| <input type="checkbox"/> | GOTERM_BP_ALL   | <a href="#">wound healing</a>                                        | RT                     |          | 8     | 7.1E-1  | 1.0E0     |
|                          |                 | Annotation Cluster 153                                               | Enrichment Score: 0.41 | <b>G</b> |       |         |           |
| <input type="checkbox"/> | GOTERM_BP_ALL   | <a href="#">anatomical structure formation</a>                       | RT                     |          | 25    | 1.1E-1  | 9.0E-1    |
| <input type="checkbox"/> | GOTERM_BP_ALL   | <a href="#">angiogenesis</a>                                         | RT                     |          | 16    | 4.2E-1  | 9.9E-1    |
| <input type="checkbox"/> | GOTERM_BP_ALL   | <a href="#">blood vessel development</a>                             | RT                     |          | 22    | 4.9E-1  | 1.0E0     |
| <input type="checkbox"/> | GOTERM_BP_ALL   | <a href="#">blood vessel morphogenesis</a>                           | RT                     |          | 19    | 5.0E-1  | 1.0E0     |
| <input type="checkbox"/> | GOTERM_BP_ALL   | <a href="#">vasculature development</a>                              | RT                     |          | 22    | 5.1E-1  | 1.0E0     |
| <input type="checkbox"/> | GOTERM_BP_ALL   | <a href="#">organ morphogenesis</a>                                  | RT                     |          | 47    | 5.7E-1  | 1.0E0     |
|                          |                 | Annotation Cluster 154                                               | Enrichment Score: 0.41 | <b>G</b> |       |         |           |
| <input type="checkbox"/> | GOTERM_BP_ALL   | <a href="#">rhythmic process</a>                                     | RT                     |          | 14    | 2.5E-2  | 6.2E-1    |
| <input type="checkbox"/> | GOTERM_BP_ALL   | <a href="#">menstrual cycle phase</a>                                | RT                     |          | 6     | 1.8E-1  | 9.5E-1    |
| <input type="checkbox"/> | GOTERM_BP_ALL   | <a href="#">menstrual cycle process</a>                              | RT                     |          | 6     | 1.9E-1  | 9.6E-1    |
| <input type="checkbox"/> | GOTERM_BP_ALL   | <a href="#">ovulation from ovarian follicle</a>                      | RT                     |          | 3     | 2.1E-1  | 9.6E-1    |
| <input type="checkbox"/> | GOTERM_BP_ALL   | <a href="#">ovulation</a>                                            | RT                     |          | 3     | 2.4E-1  | 9.7E-1    |
| <input type="checkbox"/> | GOTERM_BP_ALL   | <a href="#">female gonad development</a>                             | RT                     |          | 6     | 2.8E-1  | 9.7E-1    |
| <input type="checkbox"/> | GOTERM_BP_ALL   | <a href="#">development of primary female sexual characteristics</a> | RT                     |          | 6     | 3.1E-1  | 9.8E-1    |
| <input type="checkbox"/> | GOTERM_BP_ALL   | <a href="#">female sex differentiation</a>                           | RT                     |          | 6     | 3.1E-1  | 9.8E-1    |
| <input type="checkbox"/> | GOTERM_BP_ALL   | <a href="#">menstrual cycle</a>                                      | RT                     |          | 6     | 3.3E-1  | 9.8E-1    |
| <input type="checkbox"/> | GOTERM_BP_ALL   | <a href="#">female gamete generation</a>                             | RT                     |          | 4     | 5.7E-1  | 1.0E0     |
| <input type="checkbox"/> | GOTERM_BP_ALL   | <a href="#">gonad development</a>                                    | RT                     |          | 6     | 6.1E-1  | 1.0E0     |
| <input type="checkbox"/> | GOTERM_BP_ALL   | <a href="#">ovarian follicle development</a>                         | RT                     |          | 3     | 6.3E-1  | 1.0E0     |
| <input type="checkbox"/> | GOTERM_BP_ALL   | <a href="#">reproductive structure development</a>                   | RT                     |          | 6     | 6.4E-1  | 1.0E0     |
| <input type="checkbox"/> | GOTERM_BP_ALL   | <a href="#">reproductive developmental process</a>                   | RT                     |          | 9     | 6.5E-1  | 1.0E0     |
| <input type="checkbox"/> | GOTERM_BP_ALL   | <a href="#">reproductive process in a multicellular organism</a>     | RT                     |          | 7     | 6.6E-1  | 1.0E0     |
| <input type="checkbox"/> | GOTERM_BP_ALL   | <a href="#">multicellular organism reproduction</a>                  | RT                     |          | 7     | 6.6E-1  | 1.0E0     |
| <input type="checkbox"/> | GOTERM_BP_ALL   | <a href="#">sex differentiation</a>                                  | RT                     |          | 8     | 7.0E-1  | 1.0E0     |
| <input type="checkbox"/> | GOTERM_BP_ALL   | <a href="#">development of primary sexual characteristics</a>        | RT                     |          | 6     | 7.1E-1  | 1.0E0     |
| <input type="checkbox"/> | GOTERM_BP_ALL   | <a href="#">epithelial cell differentiation</a>                      | RT                     |          | 3     | 8.8E-1  | 1.0E0     |
| <input type="checkbox"/> | GOTERM_BP_ALL   | <a href="#">reproductive process</a>                                 | RT                     |          | 16    | 9.2E-1  | 1.0E0     |
|                          |                 | Annotation Cluster 155                                               | Enrichment Score: 0.41 | <b>G</b> |       |         |           |
| <input type="checkbox"/> | GOTERM_CC_ALL   | <a href="#">vesicle</a>                                              | RT                     |          | 35    | 1.8E-1  | 9.9E-1    |
| <input type="checkbox"/> | GOTERM_CC_ALL   | <a href="#">cytoplasmic vesicle</a>                                  | RT                     |          | 34    | 1.9E-1  | 9.9E-1    |
| <input type="checkbox"/> | SP_PIR_KEYWORDS | <a href="#">cytoplasmic vesicle</a>                                  | RT                     |          | 15    | 2.3E-1  | 9.4E-1    |
| <input type="checkbox"/> | GOTERM_CC_ALL   | <a href="#">membrane-bound vesicle</a>                               | RT                     |          | 23    | 4.4E-1  | 1.0E0     |
| <input type="checkbox"/> | GOTERM_CC_ALL   | <a href="#">cytoplasmic membrane-bound vesicle</a>                   | RT                     |          | 22    | 4.5E-1  | 1.0E0     |
| <input type="checkbox"/> | GOTERM_CC_ALL   | <a href="#">synaptic vesicle</a>                                     | RT                     |          | 6     | 5.1E-1  | 1.0E0     |
| <input type="checkbox"/> | GOTERM_CC_ALL   | <a href="#">clathrin-coated vesicle</a>                              | RT                     |          | 8     | 7.8E-1  | 1.0E0     |
| <input type="checkbox"/> | GOTERM_CC_ALL   | <a href="#">coated vesicle</a>                                       | RT                     |          | 8     | 8.9E-1  | 1.0E0     |
|                          |                 | Annotation Cluster 156                                               | Enrichment Score: 0.4  | <b>G</b> |       |         |           |
| <input type="checkbox"/> | INTERPRO        | <a href="#">NF-kappa-B/Rel/dorsal</a>                                | RT                     |          | 3     | 2.4E-1  | 1.0E0     |
| <input type="checkbox"/> | INTERPRO        | <a href="#">Rel homology</a>                                         | RT                     |          | 3     | 2.8E-1  | 1.0E0     |
| <input type="checkbox"/> | INTERPRO        | <a href="#">Cell surface receptor IPT/TIG</a>                        | RT                     |          | 4     | 5.7E-1  | 1.0E0     |
| <input type="checkbox"/> | SMART           | <a href="#">IPT</a>                                                  | RT                     |          | 4     | 6.6E-1  | 1.0E0     |
|                          |                 | Annotation Cluster 157                                               | Enrichment Score: 0.39 | <b>G</b> |       |         |           |
| <input type="checkbox"/> | BIOCARTA        | <a href="#">AKT Signaling Pathway</a>                                | RT                     |          | 7     | 2.6E-2  | 9.8E-1    |
| <input type="checkbox"/> | BIOCARTA        | <a href="#">NFkB activation by Nontypeable Hemophilus influenzae</a> | RT                     |          | 8     | 4.3E-2  | 9.6E-1    |
| <input type="checkbox"/> | BIOCARTA        | <a href="#">Acetylation and Deacetylation of RelA in The Nucleus</a> | RT                     |          | 5     | 1.2E-1  | 9.9E-1    |



|                          |                        |                                                                                                      |          |  |       |         |           |
|--------------------------|------------------------|------------------------------------------------------------------------------------------------------|----------|--|-------|---------|-----------|
| <input type="checkbox"/> | BIOCARTA               | <a href="#">Activation of PKC through G protein coupled receptor</a>                                 | RT       |  | 3     | 1.6E-1  | 9.9E-1    |
| <input type="checkbox"/> | BIOCARTA               | <a href="#">Erythropoietin mediated neuroprotection through NF-kB</a>                                | RT       |  | 4     | 2.0E-1  | 1.0E0     |
| <input type="checkbox"/> | BIOCARTA               | <a href="#">Double Stranded RNA Induced Gene Expression</a>                                          | RT       |  | 3     | 3.9E-1  | 1.0E0     |
| <input type="checkbox"/> | BIOCARTA               | <a href="#">ATM Signaling Pathway</a>                                                                | RT       |  | 4     | 4.1E-1  | 1.0E0     |
| <input type="checkbox"/> | BIOCARTA               | <a href="#">The 4-1BB-dependent immune response</a>                                                  | RT       |  | 4     | 4.4E-1  | 1.0E0     |
| <input type="checkbox"/> | BIOCARTA               | <a href="#">Signal transduction through IL1R</a>                                                     | RT       |  | 5     | 4.4E-1  | 9.9E-1    |
| <input type="checkbox"/> | BIOCARTA               | <a href="#">Influence of Ras and Rho proteins on G1 to S Transition</a>                              | RT       |  | 5     | 4.4E-1  | 9.9E-1    |
| <input type="checkbox"/> | BIOCARTA               | <a href="#">Induction of apoptosis through DR3 and DR4/5 Death Receptors</a>                         | RT       |  | 5     | 4.7E-1  | 9.9E-1    |
| <input type="checkbox"/> | BIOCARTA               | <a href="#">CD40L Signaling Pathway</a>                                                              | RT       |  | 3     | 5.9E-1  | 1.0E0     |
| <input type="checkbox"/> | BIOCARTA               | <a href="#">Cadmium induces DNA synthesis and proliferation in macrophages</a>                       | RT       |  | 3     | 5.9E-1  | 1.0E0     |
| <input type="checkbox"/> | BIOCARTA               | <a href="#">TNF/Stress Related Signaling</a>                                                         | RT       |  | 4     | 6.3E-1  | 1.0E0     |
| <input type="checkbox"/> | BIOCARTA               | <a href="#">CXCR4 Signaling Pathway</a>                                                              | RT       |  | 4     | 6.5E-1  | 1.0E0     |
| <input type="checkbox"/> | BIOCARTA               | <a href="#">Inactivation of Gsk3 by AKT causes accumulation of b-catenin in Alveolar Macrophages</a> | RT       |  | 4     | 6.5E-1  | 1.0E0     |
| <input type="checkbox"/> | BIOCARTA               | <a href="#">HIV-1 Nef</a>                                                                            | RT       |  | 7     | 6.5E-1  | 1.0E0     |
| <input type="checkbox"/> | BIOCARTA               | <a href="#">TNFR2 Signaling Pathway</a>                                                              | RT       |  | 3     | 6.9E-1  | 1.0E0     |
| <input type="checkbox"/> | BIOCARTA               | <a href="#">Neuropeptides VIP and PACAP inhibit the apoptosis of activated T cells</a>               | RT       |  | 3     | 6.9E-1  | 1.0E0     |
| <input type="checkbox"/> | BIOCARTA               | <a href="#">fMLP induced chemokine gene expression in HMC-1 cells</a>                                | RT       |  | 4     | 7.6E-1  | 1.0E0     |
| <input type="checkbox"/> | BIOCARTA               | <a href="#">NF-kB Signaling Pathway</a>                                                              | RT       |  | 3     | 7.7E-1  | 1.0E0     |
| <input type="checkbox"/> | BIOCARTA               | <a href="#">T Cell Receptor Signaling Pathway</a>                                                    | RT       |  | 4     | 8.9E-1  | 1.0E0     |
| <input type="checkbox"/> | BIOCARTA               | <a href="#">Keratinocyte Differentiation</a>                                                         | RT       |  | 3     | 9.7E-1  | 1.0E0     |
| <input type="checkbox"/> | BIOCARTA               | <a href="#">MAPKinase Signaling Pathway</a>                                                          | RT       |  | 4     | 1.0E0   | 1.0E0     |
|                          | Annotation Cluster 158 | Enrichment Score: 0.39                                                                               | <b>G</b> |  | Count | P_Value | Benjamini |
| <input type="checkbox"/> | UP_SEQ_FEATURE         | region of interest:Heparin-binding                                                                   | RT       |  | 4     | 1.4E-1  | 1.0E0     |
| <input type="checkbox"/> | GOTERM_MF_ALL          | <a href="#">heparin binding</a>                                                                      | RT       |  | 8     | 3.9E-1  | 1.0E0     |
| <input type="checkbox"/> | GOTERM_MF_ALL          | <a href="#">pattern binding</a>                                                                      | RT       |  | 11    | 4.1E-1  | 1.0E0     |
| <input type="checkbox"/> | GOTERM_MF_ALL          | <a href="#">polysaccharide binding</a>                                                               | RT       |  | 10    | 4.6E-1  | 1.0E0     |
| <input type="checkbox"/> | GOTERM_MF_ALL          | <a href="#">glycosaminoglycan binding</a>                                                            | RT       |  | 8     | 6.6E-1  | 1.0E0     |
| <input type="checkbox"/> | SP_PIR_KEYWORDS        | <a href="#">heparin-binding</a>                                                                      | RT       |  | 5     | 7.1E-1  | 1.0E0     |
|                          | Annotation Cluster 159 | Enrichment Score: 0.38                                                                               | <b>G</b> |  | Count | P_Value | Benjamini |
| <input type="checkbox"/> | GOTERM_BP_ALL          | <a href="#">striated muscle development</a>                                                          | RT       |  | 16    | 2.2E-1  | 9.6E-1    |
| <input type="checkbox"/> | GOTERM_BP_ALL          | <a href="#">regulation of myoblast differentiation</a>                                               | RT       |  | 3     | 2.4E-1  | 9.7E-1    |
| <input type="checkbox"/> | GOTERM_BP_ALL          | <a href="#">skeletal muscle development</a>                                                          | RT       |  | 12    | 3.3E-1  | 9.8E-1    |
| <input type="checkbox"/> | GOTERM_BP_ALL          | <a href="#">muscle cell differentiation</a>                                                          | RT       |  | 9     | 3.4E-1  | 9.8E-1    |
| <input type="checkbox"/> | GOTERM_BP_ALL          | <a href="#">muscle development</a>                                                                   | RT       |  | 18    | 4.6E-1  | 1.0E0     |
| <input type="checkbox"/> | GOTERM_BP_ALL          | <a href="#">myoblast differentiation</a>                                                             | RT       |  | 5     | 5.3E-1  | 1.0E0     |
| <input type="checkbox"/> | GOTERM_BP_ALL          | <a href="#">muscle fiber development</a>                                                             | RT       |  | 6     | 7.4E-1  | 1.0E0     |
| <input type="checkbox"/> | GOTERM_BP_ALL          | <a href="#">skeletal muscle fiber development</a>                                                    | RT       |  | 6     | 7.4E-1  | 1.0E0     |
|                          | Annotation Cluster 160 | Enrichment Score: 0.38                                                                               | <b>G</b> |  | Count | P_Value | Benjamini |
| <input type="checkbox"/> | UP_SEQ_FEATURE         | domain:C2                                                                                            | RT       |  | 6     | 2.4E-1  | 1.0E0     |
| <input type="checkbox"/> | INTERPRO               | <a href="#">C2 calcium-dependent membrane targeting</a>                                              | RT       |  | 12    | 4.7E-1  | 1.0E0     |
| <input type="checkbox"/> | SMART                  | <a href="#">C2</a>                                                                                   | RT       |  | 12    | 6.5E-1  | 1.0E0     |
|                          | Annotation Cluster 161 | Enrichment Score: 0.38                                                                               | <b>G</b> |  | Count | P_Value | Benjamini |
| <input type="checkbox"/> | GOTERM_CC_ALL          | <a href="#">ubiquitin ligase complex</a>                                                             | RT       |  | 7     | 2.5E-1  | 9.9E-1    |
| <input type="checkbox"/> | GOTERM_MF_ALL          | <a href="#">ligase activity</a>                                                                      | RT       |  | 34    | 3.3E-1  | 1.0E0     |
| <input type="checkbox"/> | GOTERM_MF_ALL          | <a href="#">ubiquitin-protein ligase activity</a>                                                    | RT       |  | 13    | 3.7E-1  | 1.0E0     |
| <input type="checkbox"/> | GOTERM_MF_ALL          | <a href="#">ligase activity, forming carbon-nitrogen</a>                                             | RT       |  | 10    | 3.8E-1  | 1.0E0     |

|                          |                        |                                                                                                                 |                    |  | Count | P_Value | Benjamini |
|--------------------------|------------------------|-----------------------------------------------------------------------------------------------------------------|--------------------|--|-------|---------|-----------|
| <input type="checkbox"/> |                        | <a href="#">bonds</a>                                                                                           | <a href="#">RT</a> |  | 10    | 3.0E-1  | 1.0E0     |
| <input type="checkbox"/> | GOTERM_MF_ALL          | <a href="#">small protein conjugating enzyme activity</a>                                                       | <a href="#">RT</a> |  | 13    | 4.0E-1  | 1.0E0     |
| <input type="checkbox"/> | GOTERM_MF_ALL          | <a href="#">small conjugating protein ligase activity</a>                                                       | <a href="#">RT</a> |  | 13    | 4.4E-1  | 1.0E0     |
| <input type="checkbox"/> | GOTERM_MF_ALL          | <a href="#">acid-amino acid ligase activity</a>                                                                 | <a href="#">RT</a> |  | 14    | 4.8E-1  | 1.0E0     |
| <input type="checkbox"/> | SMART                  | <a href="#">UBCc</a>                                                                                            | <a href="#">RT</a> |  | 6     | 5.0E-1  | 9.9E-1    |
| <input type="checkbox"/> | SP_PIR_KEYWORDS        | <a href="#">ligase</a>                                                                                          | <a href="#">RT</a> |  | 19    | 7.9E-1  | 1.0E0     |
|                          | Annotation Cluster 162 | Enrichment Score: 0.37                                                                                          | <b>G</b>           |  | Count | P_Value | Benjamini |
| <input type="checkbox"/> | UP_SEQ_FEATURE         | repeat:WD 3                                                                                                     | <a href="#">RT</a> |  | 15    | 2.4E-1  | 1.0E0     |
| <input type="checkbox"/> | UP_SEQ_FEATURE         | repeat:WD 1                                                                                                     | <a href="#">RT</a> |  | 15    | 2.5E-1  | 1.0E0     |
| <input type="checkbox"/> | UP_SEQ_FEATURE         | repeat:WD 2                                                                                                     | <a href="#">RT</a> |  | 15    | 2.5E-1  | 1.0E0     |
| <input type="checkbox"/> | SP_PIR_KEYWORDS        | <a href="#">wd repeat</a>                                                                                       | <a href="#">RT</a> |  | 24    | 2.5E-1  | 9.5E-1    |
| <input type="checkbox"/> | UP_SEQ_FEATURE         | repeat:WD 5                                                                                                     | <a href="#">RT</a> |  | 12    | 4.1E-1  | 1.0E0     |
| <input type="checkbox"/> | UP_SEQ_FEATURE         | repeat:WD 4                                                                                                     | <a href="#">RT</a> |  | 12    | 5.0E-1  | 1.0E0     |
| <input type="checkbox"/> | UP_SEQ_FEATURE         | repeat:WD 6                                                                                                     | <a href="#">RT</a> |  | 9     | 5.1E-1  | 1.0E0     |
| <input type="checkbox"/> | INTERPRO               | <a href="#">WD40 repeat</a>                                                                                     | <a href="#">RT</a> |  | 16    | 7.6E-1  | 1.0E0     |
| <input type="checkbox"/> | UP_SEQ_FEATURE         | repeat:WD 7                                                                                                     | <a href="#">RT</a> |  | 5     | 7.8E-1  | 1.0E0     |
| <input type="checkbox"/> | SMART                  | <a href="#">WD40</a>                                                                                            | <a href="#">RT</a> |  | 19    | 7.9E-1  | 1.0E0     |
|                          | Annotation Cluster 163 | Enrichment Score: 0.37                                                                                          | <b>G</b>           |  | Count | P_Value | Benjamini |
| <input type="checkbox"/> | INTERPRO               | <a href="#">Phox-like</a>                                                                                       | <a href="#">RT</a> |  | 6     | 3.4E-1  | 1.0E0     |
| <input type="checkbox"/> | SMART                  | <a href="#">PX</a>                                                                                              | <a href="#">RT</a> |  | 6     | 4.3E-1  | 9.8E-1    |
| <input type="checkbox"/> | UP_SEQ_FEATURE         | domain:PX                                                                                                       | <a href="#">RT</a> |  | 3     | 5.4E-1  | 1.0E0     |
|                          | Annotation Cluster 164 | Enrichment Score: 0.36                                                                                          | <b>G</b>           |  | Count | P_Value | Benjamini |
| <input type="checkbox"/> | GOTERM_CC_ALL          | <a href="#">condensed chromosome, pericentric region</a>                                                        | <a href="#">RT</a> |  | 3     | 1.7E-1  | 9.9E-1    |
| <input type="checkbox"/> | GOTERM_CC_ALL          | <a href="#">condensed chromosome</a>                                                                            | <a href="#">RT</a> |  | 6     | 5.1E-1  | 1.0E0     |
| <input type="checkbox"/> | GOTERM_CC_ALL          | <a href="#">chromosome, pericentric region</a>                                                                  | <a href="#">RT</a> |  | 4     | 9.3E-1  | 1.0E0     |
|                          | Annotation Cluster 165 | Enrichment Score: 0.36                                                                                          | <b>G</b>           |  | Count | P_Value | Benjamini |
| <input type="checkbox"/> | BIOCARTA               | <a href="#">PTEN dependent cell cycle arrest and apoptosis</a>                                                  | <a href="#">RT</a> |  | 5     | 2.7E-1  | 9.9E-1    |
| <input type="checkbox"/> | BIOCARTA               | <a href="#">Skeletal muscle hypertrophy is regulated via AKT/mTOR pathway</a>                                   | <a href="#">RT</a> |  | 4     | 4.1E-1  | 1.0E0     |
| <input type="checkbox"/> | BIOCARTA               | <a href="#">mTOR Signaling Pathway</a>                                                                          | <a href="#">RT</a> |  | 4     | 4.4E-1  | 1.0E0     |
| <input type="checkbox"/> | BIOCARTA               | <a href="#">Regulation of eIF4e and p70 S6 Kinase</a>                                                           | <a href="#">RT</a> |  | 3     | 7.2E-1  | 1.0E0     |
|                          | Annotation Cluster 166 | Enrichment Score: 0.36                                                                                          | <b>G</b>           |  | Count | P_Value | Benjamini |
| <input type="checkbox"/> | KEGG_PATHWAY           | <a href="#">Propanoate metabolism</a>                                                                           | <a href="#">RT</a> |  | 5     | 2.9E-1  | 8.3E-1    |
| <input type="checkbox"/> | GOTERM_MF_ALL          | <a href="#">oxidoreductase activity, acting on the aldehyde or oxo group of donors</a>                          | <a href="#">RT</a> |  | 5     | 4.7E-1  | 1.0E0     |
| <input type="checkbox"/> | GOTERM_MF_ALL          | <a href="#">oxidoreductase activity, acting on the aldehyde or oxo group of donors, NAD or NADP as acceptor</a> | <a href="#">RT</a> |  | 4     | 5.0E-1  | 1.0E0     |
| <input type="checkbox"/> | KEGG_PATHWAY           | <a href="#">Valine, leucine and isoleucine degradation</a>                                                      | <a href="#">RT</a> |  | 5     | 5.3E-1  | 9.1E-1    |
|                          | Annotation Cluster 167 | Enrichment Score: 0.36                                                                                          | <b>G</b>           |  | Count | P_Value | Benjamini |
| <input type="checkbox"/> | GOTERM_BP_ALL          | <a href="#">protein oligomerization</a>                                                                         | <a href="#">RT</a> |  | 7     | 2.7E-1  | 9.7E-1    |
| <input type="checkbox"/> | GOTERM_BP_ALL          | <a href="#">protein homooligomerization</a>                                                                     | <a href="#">RT</a> |  | 5     | 3.6E-1  | 9.9E-1    |
| <input type="checkbox"/> | GOTERM_BP_ALL          | <a href="#">protein complex assembly</a>                                                                        | <a href="#">RT</a> |  | 12    | 8.8E-1  | 1.0E0     |
|                          | Annotation Cluster 168 | Enrichment Score: 0.35                                                                                          | <b>G</b>           |  | Count | P_Value | Benjamini |
| <input type="checkbox"/> | UP_SEQ_FEATURE         | region of interest:Calmodulin-binding                                                                           | <a href="#">RT</a> |  | 6     | 3.1E-1  | 1.0E0     |
| <input type="checkbox"/> | GOTERM_MF_ALL          | <a href="#">calmodulin-dependent protein kinase activity</a>                                                    | <a href="#">RT</a> |  | 3     | 4.0E-1  | 1.0E0     |
| <input type="checkbox"/> | GOTERM_MF_ALL          | <a href="#">calmodulin binding</a>                                                                              | <a href="#">RT</a> |  | 11    | 5.4E-1  | 1.0E0     |
| <input type="checkbox"/> | SP_PIR_KEYWORDS        | <a href="#">calmodulin-binding</a>                                                                              | <a href="#">RT</a> |  | 9     | 5.8E-1  | 1.0E0     |
|                          | Annotation Cluster 169 | Enrichment Score: 0.35                                                                                          | <b>G</b>           |  | Count | P_Value | Benjamini |
| <input type="checkbox"/> | GOTERM_MF_ALL          | <a href="#">carbon-carbon lyase activity</a>                                                                    | <a href="#">RT</a> |  | 8     | 9.4E-2  | 9.8E-1    |
| <input type="checkbox"/> | GOTERM_MF_ALL          | <a href="#">carboxy-lyase activity</a>                                                                          | <a href="#">RT</a> |  | 4     | 5.4E-1  | 1.0E0     |
| <input type="checkbox"/> | SP_PIR_KEYWORDS        | <a href="#">decarboxylase</a>                                                                                   | <a href="#">RT</a> |  | 3     | 6.1E-1  | 1.0E0     |

| <input type="checkbox"/> | Annotation             | Term                                                                       | RT                 |  | Count | P-Value | Benjamini |
|--------------------------|------------------------|----------------------------------------------------------------------------|--------------------|--|-------|---------|-----------|
| <input type="checkbox"/> | GOTERM_MF_ALL          | <a href="#">lyase activity</a>                                             | <a href="#">RT</a> |  | 14    | 7.0E-1  | 1.0E0     |
| <input type="checkbox"/> | SP_PIR_KEYWORDS        | <a href="#">lyase</a>                                                      | <a href="#">RT</a> |  | 9     | 7.9E-1  | 1.0E0     |
|                          | Annotation Cluster 170 | Enrichment Score: 0.35                                                     | <b>G</b>           |  | Count | P-Value | Benjamini |
| <input type="checkbox"/> | INTERPRO               | <a href="#">RhoGAP</a>                                                     | <a href="#">RT</a> |  | 6     | 3.1E-1  | 1.0E0     |
| <input type="checkbox"/> | SMART                  | <a href="#">RhoGAP</a>                                                     | <a href="#">RT</a> |  | 6     | 4.3E-1  | 9.8E-1    |
| <input type="checkbox"/> | UP_SEQ_FEATURE         | domain:Rho-GAP                                                             | <a href="#">RT</a> |  | 3     | 6.8E-1  | 1.0E0     |
|                          | Annotation Cluster 171 | Enrichment Score: 0.34                                                     | <b>G</b>           |  | Count | P-Value | Benjamini |
| <input type="checkbox"/> | GOTERM_BP_ALL          | <a href="#">cellular catabolic process</a>                                 | <a href="#">RT</a> |  | 47    | 1.8E-1  | 9.5E-1    |
| <input type="checkbox"/> | GOTERM_BP_ALL          | <a href="#">catabolic process</a>                                          | <a href="#">RT</a> |  | 59    | 1.8E-1  | 9.5E-1    |
| <input type="checkbox"/> | GOTERM_BP_ALL          | <a href="#">biopolymer catabolic process</a>                               | <a href="#">RT</a> |  | 27    | 3.1E-1  | 9.8E-1    |
| <input type="checkbox"/> | GOTERM_BP_ALL          | <a href="#">macromolecule catabolic process</a>                            | <a href="#">RT</a> |  | 32    | 4.0E-1  | 9.9E-1    |
| <input type="checkbox"/> | GOTERM_BP_ALL          | <a href="#">protein catabolic process</a>                                  | <a href="#">RT</a> |  | 20    | 4.1E-1  | 9.9E-1    |
| <input type="checkbox"/> | GOTERM_MF_ALL          | <a href="#">ubiquitin-specific protease activity</a>                       | <a href="#">RT</a> |  | 7     | 4.4E-1  | 1.0E0     |
| <input type="checkbox"/> | GOTERM_MF_ALL          | <a href="#">small conjugating protein-specific protease activity</a>       | <a href="#">RT</a> |  | 7     | 4.7E-1  | 1.0E0     |
| <input type="checkbox"/> | GOTERM_BP_ALL          | <a href="#">proteolysis involved in cellular protein catabolic process</a> | <a href="#">RT</a> |  | 14    | 5.1E-1  | 1.0E0     |
| <input type="checkbox"/> | GOTERM_BP_ALL          | <a href="#">cellular protein catabolic process</a>                         | <a href="#">RT</a> |  | 14    | 5.3E-1  | 1.0E0     |
| <input type="checkbox"/> | GOTERM_BP_ALL          | <a href="#">ubiquitin-dependent protein catabolic process</a>              | <a href="#">RT</a> |  | 13    | 5.7E-1  | 1.0E0     |
| <input type="checkbox"/> | GOTERM_MF_ALL          | <a href="#">thiolester hydrolase activity</a>                              | <a href="#">RT</a> |  | 8     | 5.9E-1  | 1.0E0     |
| <input type="checkbox"/> | GOTERM_MF_ALL          | <a href="#">ubiquitin thiolesterase activity</a>                           | <a href="#">RT</a> |  | 6     | 5.9E-1  | 1.0E0     |
| <input type="checkbox"/> | GOTERM_BP_ALL          | <a href="#">modification-dependent protein catabolic process</a>           | <a href="#">RT</a> |  | 13    | 6.0E-1  | 1.0E0     |
| <input type="checkbox"/> | GOTERM_BP_ALL          | <a href="#">modification-dependent macromolecule catabolic process</a>     | <a href="#">RT</a> |  | 13    | 6.0E-1  | 1.0E0     |
| <input type="checkbox"/> | GOTERM_BP_ALL          | <a href="#">cellular macromolecule catabolic process</a>                   | <a href="#">RT</a> |  | 23    | 6.1E-1  | 1.0E0     |
| <input type="checkbox"/> | INTERPRO               | <a href="#">Peptidase C19, ubiquitin carboxyl-terminal hydrolase 2</a>     | <a href="#">RT</a> |  | 4     | 7.5E-1  | 1.0E0     |
|                          | Annotation Cluster 172 | Enrichment Score: 0.34                                                     | <b>G</b>           |  | Count | P-Value | Benjamini |
| <input type="checkbox"/> | GOTERM_BP_ALL          | <a href="#">cofactor biosynthetic process</a>                              | <a href="#">RT</a> |  | 12    | 4.1E-1  | 9.9E-1    |
| <input type="checkbox"/> | GOTERM_BP_ALL          | <a href="#">coenzyme metabolic process</a>                                 | <a href="#">RT</a> |  | 17    | 4.6E-1  | 9.9E-1    |
| <input type="checkbox"/> | GOTERM_BP_ALL          | <a href="#">coenzyme biosynthetic process</a>                              | <a href="#">RT</a> |  | 10    | 4.7E-1  | 1.0E0     |
| <input type="checkbox"/> | GOTERM_BP_ALL          | <a href="#">cofactor metabolic process</a>                                 | <a href="#">RT</a> |  | 20    | 5.2E-1  | 1.0E0     |
|                          | Annotation Cluster 173 | Enrichment Score: 0.34                                                     | <b>G</b>           |  | Count | P-Value | Benjamini |
| <input type="checkbox"/> | INTERPRO               | <a href="#">Kelch related</a>                                              | <a href="#">RT</a> |  | 9     | 6.7E-2  | 1.0E0     |
| <input type="checkbox"/> | INTERPRO               | <a href="#">BTB/Kelch-associated</a>                                       | <a href="#">RT</a> |  | 5     | 4.3E-1  | 1.0E0     |
| <input type="checkbox"/> | INTERPRO               | <a href="#">Kelch-type beta propeller</a>                                  | <a href="#">RT</a> |  | 4     | 6.4E-1  | 1.0E0     |
| <input type="checkbox"/> | SP_PIR_KEYWORDS        | <a href="#">kelch repeat</a>                                               | <a href="#">RT</a> |  | 4     | 7.2E-1  | 1.0E0     |
| <input type="checkbox"/> | SMART                  | <a href="#">Kelch</a>                                                      | <a href="#">RT</a> |  | 5     | 8.0E-1  | 1.0E0     |
| <input type="checkbox"/> | INTERPRO               | <a href="#">Kelch repeat type 1</a>                                        | <a href="#">RT</a> |  | 3     | 9.0E-1  | 1.0E0     |
|                          | Annotation Cluster 174 | Enrichment Score: 0.33                                                     | <b>G</b>           |  | Count | P-Value | Benjamini |
| <input type="checkbox"/> | UP_SEQ_FEATURE         | short sequence motif:Cell attachment site                                  | <a href="#">RT</a> |  | 9     | 1.4E-1  | 1.0E0     |
| <input type="checkbox"/> | INTERPRO               | <a href="#">von Willebrand factor, type C</a>                              | <a href="#">RT</a> |  | 3     | 8.4E-1  | 1.0E0     |
| <input type="checkbox"/> | SMART                  | <a href="#">VWC</a>                                                        | <a href="#">RT</a> |  | 3     | 8.8E-1  | 1.0E0     |
|                          | Annotation Cluster 175 | Enrichment Score: 0.33                                                     | <b>G</b>           |  | Count | P-Value | Benjamini |
| <input type="checkbox"/> | GOTERM_BP_ALL          | <a href="#">detection of biotic stimulus</a>                               | <a href="#">RT</a> |  | 3     | 2.8E-1  | 9.7E-1    |
| <input type="checkbox"/> | GOTERM_BP_ALL          | <a href="#">detection of external stimulus</a>                             | <a href="#">RT</a> |  | 7     | 3.2E-1  | 9.8E-1    |
| <input type="checkbox"/> | GOTERM_BP_ALL          | <a href="#">detection of stimulus</a>                                      | <a href="#">RT</a> |  | 7     | 4.9E-1  | 1.0E0     |
| <input type="checkbox"/> | GOTERM_BP_ALL          | <a href="#">detection of light stimulus</a>                                | <a href="#">RT</a> |  | 3     | 6.5E-1  | 1.0E0     |
| <input type="checkbox"/> | GOTERM_BP_ALL          | <a href="#">detection of abiotic stimulus</a>                              | <a href="#">RT</a> |  | 4     | 7.6E-1  | 1.0E0     |
|                          | Annotation Cluster 176 | Enrichment Score: 0.33                                                     | <b>G</b>           |  | Count | P-Value | Benjamini |
| <input type="checkbox"/> | UP_SEQ_FEATURE         | domain:NTR                                                                 | <a href="#">RT</a> |  | 3     | 4.2E-1  | 1.0E0     |
| <input type="checkbox"/> | INTERPRO               | <a href="#">Netrin, C-terminal</a>                                         | <a href="#">RT</a> |  | 3     | 4.6E-1  | 1.0E0     |

| <input type="checkbox"/> | SMART                  | <a href="#">C345C</a>                                                    | <a href="#">RT</a> |  |  |  |  | 3     | 5.2E-1  | 9.9E-1    |
|--------------------------|------------------------|--------------------------------------------------------------------------|--------------------|--|--|--|--|-------|---------|-----------|
|                          | Annotation Cluster 177 | Enrichment Score: 0.33                                                   | <b>G</b>           |  |  |  |  | Count | P_Value | Benjamini |
| <input type="checkbox"/> | INTERPRO               | <a href="#">Retinoid X receptor</a>                                      | <a href="#">RT</a> |  |  |  |  | 3     | 2.8E-1  | 1.0E0     |
| <input type="checkbox"/> | GOTERM_MF_ALL          | <a href="#">tRNA-pseudouridine synthase activity</a>                     | <a href="#">RT</a> |  |  |  |  | 3     | 4.9E-1  | 1.0E0     |
| <input type="checkbox"/> | GOTERM_MF_ALL          | <a href="#">intramolecular transferase activity</a>                      | <a href="#">RT</a> |  |  |  |  | 4     | 5.9E-1  | 1.0E0     |
| <input type="checkbox"/> | GOTERM_MF_ALL          | <a href="#">pseudouridine synthase activity</a>                          | <a href="#">RT</a> |  |  |  |  | 3     | 6.0E-1  | 1.0E0     |
|                          | Annotation Cluster 178 | Enrichment Score: 0.33                                                   | <b>G</b>           |  |  |  |  | Count | P_Value | Benjamini |
| <input type="checkbox"/> | SP_PIR_KEYWORDS        | <a href="#">glycosidase</a>                                              | <a href="#">RT</a> |  |  |  |  | 7     | 3.5E-1  | 9.8E-1    |
| <input type="checkbox"/> | GOTERM_MF_ALL          | <a href="#">hydrolase activity, acting on glycosyl bonds</a>             | <a href="#">RT</a> |  |  |  |  | 11    | 5.3E-1  | 1.0E0     |
| <input type="checkbox"/> | GOTERM_MF_ALL          | <a href="#">hydrolase activity, hydrolyzing O-glycosyl compounds</a>     | <a href="#">RT</a> |  |  |  |  | 9     | 5.6E-1  | 1.0E0     |
|                          | Annotation Cluster 179 | Enrichment Score: 0.33                                                   | <b>G</b>           |  |  |  |  | Count | P_Value | Benjamini |
| <input type="checkbox"/> | GOTERM_BP_ALL          | <a href="#">regulation of I-kappaB kinase/NF-kappaB cascade</a>          | <a href="#">RT</a> |  |  |  |  | 6     | 2.9E-1  | 9.8E-1    |
| <input type="checkbox"/> | GOTERM_BP_ALL          | <a href="#">I-kappaB kinase/NF-kappaB cascade</a>                        | <a href="#">RT</a> |  |  |  |  | 8     | 3.4E-1  | 9.8E-1    |
| <input type="checkbox"/> | GOTERM_BP_ALL          | <a href="#">positive regulation of I-kappaB kinase/NF-kappaB cascade</a> | <a href="#">RT</a> |  |  |  |  | 4     | 6.8E-1  | 1.0E0     |
| <input type="checkbox"/> | GOTERM_BP_ALL          | <a href="#">positive regulation of signal transduction</a>               | <a href="#">RT</a> |  |  |  |  | 9     | 7.1E-1  | 1.0E0     |
|                          | Annotation Cluster 180 | Enrichment Score: 0.33                                                   | <b>G</b>           |  |  |  |  | Count | P_Value | Benjamini |
| <input type="checkbox"/> | GOTERM_MF_ALL          | <a href="#">UDP-glycosyltransferase activity</a>                         | <a href="#">RT</a> |  |  |  |  | 11    | 3.2E-1  | 1.0E0     |
| <input type="checkbox"/> | KEGG_PATHWAY           | <a href="#">O-Glycan biosynthesis</a>                                    | <a href="#">RT</a> |  |  |  |  | 4     | 3.9E-1  | 8.8E-1    |
| <input type="checkbox"/> | KEGG_PATHWAY           | <a href="#">Glycan structures - biosynthesis 1</a>                       | <a href="#">RT</a> |  |  |  |  | 8     | 8.6E-1  | 9.9E-1    |
|                          | Annotation Cluster 181 | Enrichment Score: 0.32                                                   | <b>G</b>           |  |  |  |  | Count | P_Value | Benjamini |
| <input type="checkbox"/> | GOTERM_BP_ALL          | <a href="#">T cell activation</a>                                        | <a href="#">RT</a> |  |  |  |  | 15    | 3.3E-1  | 9.8E-1    |
| <input type="checkbox"/> | GOTERM_BP_ALL          | <a href="#">leukocyte differentiation</a>                                | <a href="#">RT</a> |  |  |  |  | 16    | 3.4E-1  | 9.8E-1    |
| <input type="checkbox"/> | GOTERM_BP_ALL          | <a href="#">lymphocyte differentiation</a>                               | <a href="#">RT</a> |  |  |  |  | 11    | 4.8E-1  | 1.0E0     |
| <input type="checkbox"/> | GOTERM_BP_ALL          | <a href="#">alpha-beta T cell activation</a>                             | <a href="#">RT</a> |  |  |  |  | 4     | 5.9E-1  | 1.0E0     |
| <input type="checkbox"/> | GOTERM_BP_ALL          | <a href="#">T cell differentiation</a>                                   | <a href="#">RT</a> |  |  |  |  | 6     | 7.5E-1  | 1.0E0     |
|                          | Annotation Cluster 182 | Enrichment Score: 0.32                                                   | <b>G</b>           |  |  |  |  | Count | P_Value | Benjamini |
| <input type="checkbox"/> | GOTERM_BP_ALL          | <a href="#">antigen processing and presentation</a>                      | <a href="#">RT</a> |  |  |  |  | 13    | 3.1E-2  | 6.7E-1    |
| <input type="checkbox"/> | INTERPRO               | <a href="#">MHC class I-like antigen recognition</a>                     | <a href="#">RT</a> |  |  |  |  | 5     | 3.9E-1  | 1.0E0     |
| <input type="checkbox"/> | KEGG_PATHWAY           | <a href="#">Antigen processing and presentation</a>                      | <a href="#">RT</a> |  |  |  |  | 9     | 4.5E-1  | 8.8E-1    |
| <input type="checkbox"/> | GOTERM_CC_ALL          | <a href="#">MHC protein complex</a>                                      | <a href="#">RT</a> |  |  |  |  | 5     | 4.9E-1  | 1.0E0     |
| <input type="checkbox"/> | PIR_SUPERFAMILY        | PIRSF001990:class I histocompatibility antigen                           | <a href="#">RT</a> |  |  |  |  | 3     | 6.3E-1  | 1.0E0     |
| <input type="checkbox"/> | INTERPRO               | <a href="#">Immunoglobulin C1-set</a>                                    | <a href="#">RT</a> |  |  |  |  | 6     | 6.7E-1  | 1.0E0     |
| <input type="checkbox"/> | INTERPRO               | <a href="#">MHC class I, alpha chain, alpha1 and alpha2</a>              | <a href="#">RT</a> |  |  |  |  | 3     | 7.1E-1  | 1.0E0     |
| <input type="checkbox"/> | SMART                  | <a href="#">IGc1</a>                                                     | <a href="#">RT</a> |  |  |  |  | 6     | 7.5E-1  | 1.0E0     |
| <input type="checkbox"/> | GOTERM_CC_ALL          | <a href="#">MHC class I protein complex</a>                              | <a href="#">RT</a> |  |  |  |  | 3     | 7.6E-1  | 1.0E0     |
| <input type="checkbox"/> | KEGG_PATHWAY           | <a href="#">Type I diabetes mellitus</a>                                 | <a href="#">RT</a> |  |  |  |  | 5     | 8.0E-1  | 9.8E-1    |
| <input type="checkbox"/> | INTERPRO               | <a href="#">Immunoglobulin/major histocompatibility complex motif</a>    | <a href="#">RT</a> |  |  |  |  | 6     | 8.3E-1  | 1.0E0     |
|                          | Annotation Cluster 183 | Enrichment Score: 0.32                                                   | <b>G</b>           |  |  |  |  | Count | P_Value | Benjamini |
| <input type="checkbox"/> | UP_SEQ_FEATURE         | short sequence motif: BH3                                                | <a href="#">RT</a> |  |  |  |  | 3     | 3.5E-1  | 1.0E0     |
| <input type="checkbox"/> | INTERPRO               | <a href="#">Apoptosis regulator Bcl-2, BH</a>                            | <a href="#">RT</a> |  |  |  |  | 3     | 5.2E-1  | 1.0E0     |
| <input type="checkbox"/> | SMART                  | <a href="#">BCL</a>                                                      | <a href="#">RT</a> |  |  |  |  | 3     | 6.1E-1  | 1.0E0     |
|                          | Annotation Cluster 184 | Enrichment Score: 0.31                                                   | <b>G</b>           |  |  |  |  | Count | P_Value | Benjamini |
| <input type="checkbox"/> | SP_PIR_KEYWORDS        | <a href="#">2Fe-2S</a>                                                   | <a href="#">RT</a> |  |  |  |  | 3     | 3.7E-1  | 9.7E-1    |
| <input type="checkbox"/> | SP_PIR_KEYWORDS        | <a href="#">iron-sulfur</a>                                              | <a href="#">RT</a> |  |  |  |  | 5     | 4.2E-1  | 9.9E-1    |
| <input type="checkbox"/> | GOTERM_MF_ALL          | <a href="#">2 iron, 2 sulfur cluster binding</a>                         | <a href="#">RT</a> |  |  |  |  | 3     | 4.6E-1  | 1.0E0     |
| <input type="checkbox"/> | GOTERM_MF_ALL          | <a href="#">metal cluster binding</a>                                    | <a href="#">RT</a> |  |  |  |  | 5     | 6.1E-1  | 1.0E0     |
| <input type="checkbox"/> | GOTERM_MF_ALL          | <a href="#">iron-sulfur cluster binding</a>                              | <a href="#">RT</a> |  |  |  |  | 5     | 6.1E-1  | 1.0E0     |
|                          | Annotation Cluster 185 | Enrichment Score: 0.31                                                   | <b>G</b>           |  |  |  |  | Count | P_Value | Benjamini |

| <input type="checkbox"/> | Category        | Term                                                                | RT       | Bar | Count | P_Value | Benjamini |
|--------------------------|-----------------|---------------------------------------------------------------------|----------|-----|-------|---------|-----------|
| <input type="checkbox"/> | GOTERM_BP_ALL   | <a href="#">protein import into nucleus, translocation</a>          | RT       |     | 5     | 3.5E-2  | 6.8E-1    |
| <input type="checkbox"/> | GOTERM_BP_ALL   | <a href="#">protein import into nucleus</a>                         | RT       |     | 7     | 5.4E-1  | 1.0E0     |
| <input type="checkbox"/> | GOTERM_BP_ALL   | <a href="#">nuclear import</a>                                      | RT       |     | 7     | 5.7E-1  | 1.0E0     |
| <input type="checkbox"/> | GOTERM_BP_ALL   | <a href="#">protein import</a>                                      | RT       |     | 7     | 7.2E-1  | 1.0E0     |
| <input type="checkbox"/> | GOTERM_BP_ALL   | <a href="#">nucleocytoplasmic transport</a>                         | RT       |     | 7     | 9.5E-1  | 1.0E0     |
| <input type="checkbox"/> | GOTERM_BP_ALL   | <a href="#">nuclear transport</a>                                   | RT       |     | 7     | 9.5E-1  | 1.0E0     |
| <input type="checkbox"/> | GOTERM_BP_ALL   | <a href="#">protein targeting</a>                                   | RT       |     | 15    | 9.6E-1  | 1.0E0     |
| Annotation Cluster 186   |                 | Enrichment Score: 0.31                                              | <b>G</b> |     | Count | P_Value | Benjamini |
| <input type="checkbox"/> | KEGG_PATHWAY    | <a href="#">Bile acid biosynthesis</a>                              | RT       |     | 6     | 1.8E-1  | 7.5E-1    |
| <input type="checkbox"/> | KEGG_PATHWAY    | <a href="#">Lysine degradation</a>                                  | RT       |     | 4     | 7.3E-1  | 9.7E-1    |
| <input type="checkbox"/> | KEGG_PATHWAY    | <a href="#">Butanoate metabolism</a>                                | RT       |     | 3     | 9.4E-1  | 1.0E0     |
| Annotation Cluster 187   |                 | Enrichment Score: 0.3                                               | <b>G</b> |     | Count | P_Value | Benjamini |
| <input type="checkbox"/> | GOTERM_MF_ALL   | <a href="#">coenzyme binding</a>                                    | RT       |     | 13    | 4.4E-1  | 1.0E0     |
| <input type="checkbox"/> | GOTERM_MF_ALL   | <a href="#">FAD binding</a>                                         | RT       |     | 7     | 4.4E-1  | 1.0E0     |
| <input type="checkbox"/> | GOTERM_MF_ALL   | <a href="#">cofactor binding</a>                                    | RT       |     | 16    | 6.4E-1  | 1.0E0     |
| Annotation Cluster 188   |                 | Enrichment Score: 0.3                                               | <b>G</b> |     | Count | P_Value | Benjamini |
| <input type="checkbox"/> | UP_SEQ_FEATURE  | domain:FERM                                                         | RT       |     | 5     | 2.5E-1  | 1.0E0     |
| <input type="checkbox"/> | INTERPRO        | <a href="#">FERM-type 3-helical bundle</a>                          | RT       |     | 5     | 4.5E-1  | 1.0E0     |
| <input type="checkbox"/> | INTERPRO        | <a href="#">Ezrin/radixin/moesin ERM</a>                            | RT       |     | 3     | 4.6E-1  | 1.0E0     |
| <input type="checkbox"/> | INTERPRO        | <a href="#">Band 4.1, N-terminal</a>                                | RT       |     | 4     | 7.4E-1  | 1.0E0     |
| <input type="checkbox"/> | SMART           | <a href="#">B41</a>                                                 | RT       |     | 4     | 8.4E-1  | 1.0E0     |
| Annotation Cluster 189   |                 | Enrichment Score: 0.29                                              | <b>G</b> |     | Count | P_Value | Benjamini |
| <input type="checkbox"/> | GOTERM_CC_ALL   | <a href="#">microbody membrane</a>                                  | RT       |     | 3     | 4.8E-1  | 1.0E0     |
| <input type="checkbox"/> | GOTERM_CC_ALL   | <a href="#">peroxisomal membrane</a>                                | RT       |     | 3     | 4.8E-1  | 1.0E0     |
| <input type="checkbox"/> | GOTERM_CC_ALL   | <a href="#">microbody part</a>                                      | RT       |     | 3     | 5.4E-1  | 1.0E0     |
| <input type="checkbox"/> | GOTERM_CC_ALL   | <a href="#">peroxisomal part</a>                                    | RT       |     | 3     | 5.4E-1  | 1.0E0     |
| Annotation Cluster 190   |                 | Enrichment Score: 0.29                                              | <b>G</b> |     | Count | P_Value | Benjamini |
| <input type="checkbox"/> | GOTERM_MF_ALL   | <a href="#">glucose transmembrane transporter activity</a>          | RT       |     | 3     | 3.1E-1  | 1.0E0     |
| <input type="checkbox"/> | GOTERM_MF_ALL   | <a href="#">carbohydrate transmembrane transporter activity</a>     | RT       |     | 6     | 3.2E-1  | 1.0E0     |
| <input type="checkbox"/> | GOTERM_MF_ALL   | <a href="#">hexose transmembrane transporter activity</a>           | RT       |     | 3     | 3.4E-1  | 1.0E0     |
| <input type="checkbox"/> | GOTERM_MF_ALL   | <a href="#">monosaccharide transmembrane transporter activity</a>   | RT       |     | 3     | 3.4E-1  | 1.0E0     |
| <input type="checkbox"/> | GOTERM_BP_ALL   | <a href="#">carbohydrate transport</a>                              | RT       |     | 8     | 4.1E-1  | 9.9E-1    |
| <input type="checkbox"/> | GOTERM_MF_ALL   | <a href="#">sugar:hydrogen ion symporter activity</a>               | RT       |     | 5     | 4.9E-1  | 1.0E0     |
| <input type="checkbox"/> | GOTERM_MF_ALL   | <a href="#">sugar transmembrane transporter activity</a>            | RT       |     | 5     | 5.1E-1  | 1.0E0     |
| <input type="checkbox"/> | GOTERM_MF_ALL   | <a href="#">secondary active transmembrane transporter activity</a> | RT       |     | 16    | 6.5E-1  | 1.0E0     |
| <input type="checkbox"/> | SP_PIR_KEYWORDS | <a href="#">sugar transport</a>                                     | RT       |     | 3     | 7.5E-1  | 1.0E0     |
| <input type="checkbox"/> | GOTERM_MF_ALL   | <a href="#">symporter activity</a>                                  | RT       |     | 11    | 7.9E-1  | 1.0E0     |
| <input type="checkbox"/> | GOTERM_MF_ALL   | <a href="#">active transmembrane transporter activity</a>           | RT       |     | 26    | 8.4E-1  | 1.0E0     |
| <input type="checkbox"/> | SP_PIR_KEYWORDS | <a href="#">Symport</a>                                             | RT       |     | 6     | 8.6E-1  | 1.0E0     |
| Annotation Cluster 191   |                 | Enrichment Score: 0.29                                              | <b>G</b> |     | Count | P_Value | Benjamini |
| <input type="checkbox"/> | GOTERM_BP_ALL   | <a href="#">vesicle docking during exocytosis</a>                   | RT       |     | 3     | 4.1E-1  | 9.9E-1    |
| <input type="checkbox"/> | GOTERM_BP_ALL   | <a href="#">membrane docking</a>                                    | RT       |     | 3     | 4.4E-1  | 9.9E-1    |
| <input type="checkbox"/> | GOTERM_BP_ALL   | <a href="#">vesicle docking</a>                                     | RT       |     | 3     | 4.4E-1  | 9.9E-1    |
| <input type="checkbox"/> | GOTERM_BP_ALL   | <a href="#">exocytosis</a>                                          | RT       |     | 6     | 9.2E-1  | 1.0E0     |
| Annotation Cluster 192   |                 | Enrichment Score: 0.28                                              | <b>G</b> |     | Count | P_Value | Benjamini |
| <input type="checkbox"/> | KEGG_PATHWAY    | <a href="#">ABC transporters - General</a>                          | RT       |     | 7     | 1.5E-1  | 6.9E-1    |
| <input type="checkbox"/> | UP_SEQ_FEATURE  | nucleotide phosphate-binding region:ATP 2                           | RT       |     | 3     | 4.5E-1  | 1.0E0     |
| <input type="checkbox"/> | UP_SEQ_FEATURE  | nucleotide phosphate-binding region:ATP 1                           | RT       |     | 3     | 4.5E-1  | 1.0E0     |

|                          |                 |                                                                                                                |                    |  |       |         |           |
|--------------------------|-----------------|----------------------------------------------------------------------------------------------------------------|--------------------|--|-------|---------|-----------|
| <input type="checkbox"/> | UP_SEQ_FEATURE  | domain:ABC transporter 1                                                                                       | <a href="#">RT</a> |  | 3     | 4.5E-1  | 1.0E0     |
| <input type="checkbox"/> | UP_SEQ_FEATURE  | domain:ABC transporter 2                                                                                       | <a href="#">RT</a> |  | 3     | 4.5E-1  | 1.0E0     |
| <input type="checkbox"/> | SP_PIR_KEYWORDS | <a href="#">nucleotide binding</a>                                                                             | <a href="#">RT</a> |  | 8     | 5.6E-1  | 1.0E0     |
| <input type="checkbox"/> | SP_PIR_KEYWORDS | <a href="#">P-loop</a>                                                                                         | <a href="#">RT</a> |  | 8     | 5.7E-1  | 1.0E0     |
| <input type="checkbox"/> | BIOCARTA        | <a href="#">Nuclear Receptors in Lipid Metabolism and Toxicity</a>                                             | <a href="#">RT</a> |  | 5     | 5.8E-1  | 1.0E0     |
| <input type="checkbox"/> | INTERPRO        | <a href="#">ABC transporter related</a>                                                                        | <a href="#">RT</a> |  | 3     | 8.1E-1  | 1.0E0     |
| <input type="checkbox"/> | SMART           | <a href="#">AAA</a>                                                                                            | <a href="#">RT</a> |  | 6     | 9.4E-1  | 1.0E0     |
| <input type="checkbox"/> | INTERPRO        | <a href="#">AAA+ ATPase, core</a>                                                                              | <a href="#">RT</a> |  | 4     | 9.5E-1  | 1.0E0     |
| Annotation Cluster 193   |                 | Enrichment Score: 0.28                                                                                         | <b>G</b>           |  | Count | P_Value | Benjamini |
| <input type="checkbox"/> | INTERPRO        | <a href="#">PDZ/DHR/GLGF</a>                                                                                   | <a href="#">RT</a> |  | 13    | 3.8E-1  | 1.0E0     |
| <input type="checkbox"/> | SMART           | <a href="#">PDZ</a>                                                                                            | <a href="#">RT</a> |  | 13    | 5.9E-1  | 1.0E0     |
| <input type="checkbox"/> | UP_SEQ_FEATURE  | domain:PDZ                                                                                                     | <a href="#">RT</a> |  | 6     | 6.6E-1  | 1.0E0     |
| Annotation Cluster 194   |                 | Enrichment Score: 0.27                                                                                         | <b>G</b>           |  | Count | P_Value | Benjamini |
| <input type="checkbox"/> | GOTERM_CC_ALL   | <a href="#">dystrophin-associated glycoprotein complex</a>                                                     | <a href="#">RT</a> |  | 3     | 3.0E-1  | 1.0E0     |
| <input type="checkbox"/> | GOTERM_CC_ALL   | <a href="#">basal lamina</a>                                                                                   | <a href="#">RT</a> |  | 4     | 4.4E-1  | 1.0E0     |
| <input type="checkbox"/> | GOTERM_CC_ALL   | <a href="#">basement membrane</a>                                                                              | <a href="#">RT</a> |  | 6     | 6.7E-1  | 1.0E0     |
| <input type="checkbox"/> | GOTERM_CC_ALL   | <a href="#">extracellular matrix part</a>                                                                      | <a href="#">RT</a> |  | 6     | 9.4E-1  | 1.0E0     |
| Annotation Cluster 195   |                 | Enrichment Score: 0.27                                                                                         | <b>G</b>           |  | Count | P_Value | Benjamini |
| <input type="checkbox"/> | GOTERM_CC_ALL   | <a href="#">ubiquitin ligase complex</a>                                                                       | <a href="#">RT</a> |  | 7     | 2.5E-1  | 9.9E-1    |
| <input type="checkbox"/> | GOTERM_BP_ALL   | <a href="#">protein ubiquitination</a>                                                                         | <a href="#">RT</a> |  | 5     | 7.5E-1  | 1.0E0     |
| <input type="checkbox"/> | GOTERM_BP_ALL   | <a href="#">protein modification by small protein conjugation</a>                                              | <a href="#">RT</a> |  | 5     | 8.2E-1  | 1.0E0     |
| Annotation Cluster 196   |                 | Enrichment Score: 0.27                                                                                         | <b>G</b>           |  | Count | P_Value | Benjamini |
| <input type="checkbox"/> | BIOCARTA        | <a href="#">Multi-Drug Resistance Factors</a>                                                                  | <a href="#">RT</a> |  | 3     | 1.1E-1  | 9.9E-1    |
| <input type="checkbox"/> | KEGG_PATHWAY    | <a href="#">ABC transporters - General</a>                                                                     | <a href="#">RT</a> |  | 7     | 1.5E-1  | 6.9E-1    |
| <input type="checkbox"/> | INTERPRO        | <a href="#">ABC transporter, transmembrane region, type 1</a>                                                  | <a href="#">RT</a> |  | 4     | 3.9E-1  | 1.0E0     |
| <input type="checkbox"/> | COG_ONTOLOGY    | <a href="#">Defense mechanisms</a>                                                                             | <a href="#">RT</a> |  | 5     | 3.9E-1  | 1.0E0     |
| <input type="checkbox"/> | INTERPRO        | <a href="#">ABC transporter, transmembrane region</a>                                                          | <a href="#">RT</a> |  | 3     | 5.2E-1  | 1.0E0     |
| <input type="checkbox"/> | BIOCARTA        | <a href="#">Nuclear Receptors in Lipid Metabolism and Toxicity</a>                                             | <a href="#">RT</a> |  | 5     | 5.8E-1  | 1.0E0     |
| <input type="checkbox"/> | GOTERM_MF_ALL   | <a href="#">ATPase activity, coupled to movement of substances</a>                                             | <a href="#">RT</a> |  | 10    | 8.3E-1  | 1.0E0     |
| <input type="checkbox"/> | GOTERM_MF_ALL   | <a href="#">ATPase activity, coupled to transmembrane movement of substances</a>                               | <a href="#">RT</a> |  | 10    | 8.3E-1  | 1.0E0     |
| <input type="checkbox"/> | GOTERM_MF_ALL   | <a href="#">hydrolase activity, acting on acid anhydrides, catalyzing transmembrane movement of substances</a> | <a href="#">RT</a> |  | 10    | 8.5E-1  | 1.0E0     |
| <input type="checkbox"/> | GOTERM_MF_ALL   | <a href="#">P-P-bond-hydrolysis-driven transmembrane transporter activity</a>                                  | <a href="#">RT</a> |  | 10    | 9.0E-1  | 1.0E0     |
| <input type="checkbox"/> | GOTERM_MF_ALL   | <a href="#">primary active transmembrane transporter activity</a>                                              | <a href="#">RT</a> |  | 10    | 9.0E-1  | 1.0E0     |
| <input type="checkbox"/> | GOTERM_MF_ALL   | <a href="#">ATPase activity, coupled to transmembrane movement of ions, phosphorylative mechanism</a>          | <a href="#">RT</a> |  | 4     | 9.3E-1  | 1.0E0     |
| <input type="checkbox"/> | GOTERM_MF_ALL   | <a href="#">ATPase activity, coupled to transmembrane movement of ions</a>                                     | <a href="#">RT</a> |  | 5     | 9.7E-1  | 1.0E0     |
| Annotation Cluster 197   |                 | Enrichment Score: 0.26                                                                                         | <b>G</b>           |  | Count | P_Value | Benjamini |
| <input type="checkbox"/> | INTERPRO        | <a href="#">GPS</a>                                                                                            | <a href="#">RT</a> |  | 4     | 3.9E-1  | 1.0E0     |
| <input type="checkbox"/> | SMART           | <a href="#">GPS</a>                                                                                            | <a href="#">RT</a> |  | 4     | 4.8E-1  | 9.9E-1    |
| <input type="checkbox"/> | UP_SEQ_FEATURE  | domain:GPS                                                                                                     | <a href="#">RT</a> |  | 3     | 5.1E-1  | 1.0E0     |
| <input type="checkbox"/> | GOTERM_BP_ALL   | <a href="#">neuropeptide signaling pathway</a>                                                                 | <a href="#">RT</a> |  | 8     | 6.3E-1  | 1.0E0     |
| <input type="checkbox"/> | INTERPRO        | <a href="#">GPCR, family 2, secretin-like</a>                                                                  | <a href="#">RT</a> |  | 4     | 8.0E-1  | 1.0E0     |
| Annotation Cluster 198   |                 | Enrichment Score: 0.26                                                                                         | <b>G</b>           |  | Count | P_Value | Benjamini |
| <input type="checkbox"/> | GOTERM_MF_ALL   | <a href="#">aminopeptidase activity</a>                                                                        | <a href="#">RT</a> |  | 5     | 4.3E-1  | 1.0E0     |
| <input type="checkbox"/> | GOTERM_MF_ALL   | <a href="#">exopeptidase activity</a>                                                                          | <a href="#">RT</a> |  | 9     | 6.2E-1  | 1.0E0     |
| <input type="checkbox"/> | SP_PIR_KEYWORDS | <a href="#">aminopeptidase</a>                                                                                 | <a href="#">RT</a> |  | 3     | 6.4E-1  | 1.0E0     |

| Annotation Cluster 199   |                 | Enrichment Score: 0.25                                                                                       |    | G                                                                                   |    | Count | P_Value | Benjamini |
|--------------------------|-----------------|--------------------------------------------------------------------------------------------------------------|----|-------------------------------------------------------------------------------------|---------------------------------------------------------------------------------------|-------|---------|-----------|
| <input type="checkbox"/> | GOTERM_CC_ALL   | <a href="#">nuclear chromosome part</a>                                                                      | RT |    |                                                                                       | 8     | 4.1E-1  | 1.0E0     |
| <input type="checkbox"/> | GOTERM_CC_ALL   | <a href="#">condensed chromosome</a>                                                                         | RT |    |                                                                                       | 6     | 5.1E-1  | 1.0E0     |
| <input type="checkbox"/> | GOTERM_CC_ALL   | <a href="#">condensed nuclear chromosome</a>                                                                 | RT |    |                                                                                       | 4     | 5.9E-1  | 1.0E0     |
| <input type="checkbox"/> | GOTERM_CC_ALL   | <a href="#">nuclear chromosome</a>                                                                           | RT |    |                                                                                       | 8     | 6.3E-1  | 1.0E0     |
| <input type="checkbox"/> | GOTERM_CC_ALL   | <a href="#">nuclear chromatin</a>                                                                            | RT |    |                                                                                       | 3     | 7.3E-1  | 1.0E0     |
| Annotation Cluster 200   |                 | Enrichment Score: 0.25                                                                                       |    | G                                                                                   |    | Count | P_Value | Benjamini |
| <input type="checkbox"/> | GOTERM_MF_ALL   | <a href="#">cytoskeletal protein binding</a>                                                                 | RT |    |                                                                                       | 36    | 3.8E-1  | 1.0E0     |
| <input type="checkbox"/> | GOTERM_BP_ALL   | <a href="#">actin polymerization and/or depolymerization</a>                                                 | RT |    |                                                                                       | 6     | 4.3E-1  | 9.9E-1    |
| <input type="checkbox"/> | GOTERM_MF_ALL   | <a href="#">actin binding</a>                                                                                | RT |    |                                                                                       | 24    | 5.5E-1  | 1.0E0     |
| <input type="checkbox"/> | GOTERM_BP_ALL   | <a href="#">actin filament-based process</a>                                                                 | RT |    |                                                                                       | 18    | 6.1E-1  | 1.0E0     |
| <input type="checkbox"/> | SP_PIR_KEYWORDS | <a href="#">actin-binding</a>                                                                                | RT |    |                                                                                       | 14    | 7.3E-1  | 1.0E0     |
| <input type="checkbox"/> | GOTERM_BP_ALL   | <a href="#">actin cytoskeleton organization and biogenesis</a>                                               | RT |    |                                                                                       | 15    | 7.9E-1  | 1.0E0     |
| Annotation Cluster 201   |                 | Enrichment Score: 0.25                                                                                       |    | G                                                                                   |    | Count | P_Value | Benjamini |
| <input type="checkbox"/> | SP_PIR_KEYWORDS | <a href="#">Zymogen</a>                                                                                      | RT |    |                                                                                       | 20    | 2.3E-1  | 9.4E-1    |
| <input type="checkbox"/> | GOTERM_BP_ALL   | <a href="#">proteolysis</a>                                                                                  | RT |    |                                                                                       | 60    | 6.4E-1  | 1.0E0     |
| <input type="checkbox"/> | GOTERM_MF_ALL   | <a href="#">peptidase activity</a>                                                                           | RT |    |                                                                                       | 57    | 6.5E-1  | 1.0E0     |
| <input type="checkbox"/> | GOTERM_MF_ALL   | <a href="#">endopeptidase activity</a>                                                                       | RT |    |                                                                                       | 36    | 7.1E-1  | 1.0E0     |
| <input type="checkbox"/> | SP_PIR_KEYWORDS | <a href="#">protease</a>                                                                                     | RT |    |                                                                                       | 35    | 8.6E-1  | 1.0E0     |
| Annotation Cluster 202   |                 | Enrichment Score: 0.24                                                                                       |    | G                                                                                   |    | Count | P_Value | Benjamini |
| <input type="checkbox"/> | GOTERM_BP_ALL   | <a href="#">somatic recombination of immunoglobulin gene segments</a>                                        | RT |    |                                                                                       | 4     | 4.6E-1  | 9.9E-1    |
| <input type="checkbox"/> | GOTERM_BP_ALL   | <a href="#">immunoglobulin production</a>                                                                    | RT |    |                                                                                       | 5     | 4.8E-1  | 1.0E0     |
| <input type="checkbox"/> | GOTERM_BP_ALL   | <a href="#">production of molecular mediator of immune response</a>                                          | RT |    |                                                                                       | 5     | 5.0E-1  | 1.0E0     |
| <input type="checkbox"/> | GOTERM_BP_ALL   | <a href="#">somatic cell DNA recombination</a>                                                               | RT |   |                                                                                       | 4     | 5.1E-1  | 1.0E0     |
| <input type="checkbox"/> | GOTERM_BP_ALL   | <a href="#">somatic diversification of immune receptors via germline recombination within a single locus</a> | RT |  |                                                                                       | 4     | 5.1E-1  | 1.0E0     |
| <input type="checkbox"/> | GOTERM_BP_ALL   | <a href="#">somatic diversification of immunoglobulins</a>                                                   | RT |  |                                                                                       | 4     | 5.3E-1  | 1.0E0     |
| <input type="checkbox"/> | GOTERM_BP_ALL   | <a href="#">somatic diversification of immune receptors</a>                                                  | RT |  |                                                                                       | 4     | 5.7E-1  | 1.0E0     |
| <input type="checkbox"/> | GOTERM_BP_ALL   | <a href="#">isotype switching</a>                                                                            | RT |  |                                                                                       | 3     | 6.0E-1  | 1.0E0     |
| <input type="checkbox"/> | GOTERM_BP_ALL   | <a href="#">immunoglobulin production during immune response</a>                                             | RT |  |                                                                                       | 3     | 6.0E-1  | 1.0E0     |
| <input type="checkbox"/> | GOTERM_BP_ALL   | <a href="#">somatic recombination of immunoglobulin genes during immune response</a>                         | RT |  |                                                                                       | 3     | 6.0E-1  | 1.0E0     |
| <input type="checkbox"/> | GOTERM_BP_ALL   | <a href="#">somatic diversification of immunoglobulins during immune response</a>                            | RT |  |                                                                                       | 3     | 6.0E-1  | 1.0E0     |
| <input type="checkbox"/> | GOTERM_BP_ALL   | <a href="#">immunoglobulin mediated immune response</a>                                                      | RT |  |                                                                                       | 7     | 6.1E-1  | 1.0E0     |
| <input type="checkbox"/> | GOTERM_BP_ALL   | <a href="#">B cell mediated immunity</a>                                                                     | RT |  |                                                                                       | 7     | 6.4E-1  | 1.0E0     |
| <input type="checkbox"/> | GOTERM_BP_ALL   | <a href="#">DNA recombination</a>                                                                            | RT |  |                                                                                       | 5     | 9.4E-1  | 1.0E0     |
| Annotation Cluster 203   |                 | Enrichment Score: 0.24                                                                                       |    | G                                                                                   |  | Count | P_Value | Benjamini |
| <input type="checkbox"/> | GOTERM_BP_ALL   | <a href="#">axon guidance</a>                                                                                | RT |  |                                                                                       | 10    | 3.3E-1  | 9.8E-1    |
| <input type="checkbox"/> | GOTERM_BP_ALL   | <a href="#">neurite development</a>                                                                          | RT |  |                                                                                       | 21    | 3.8E-1  | 9.9E-1    |
| <input type="checkbox"/> | GOTERM_BP_ALL   | <a href="#">neuron development</a>                                                                           | RT |  |                                                                                       | 23    | 4.2E-1  | 9.9E-1    |
| <input type="checkbox"/> | GOTERM_BP_ALL   | <a href="#">neuron differentiation</a>                                                                       | RT |  |                                                                                       | 28    | 4.9E-1  | 1.0E0     |
| <input type="checkbox"/> | GOTERM_BP_ALL   | <a href="#">axonogenesis</a>                                                                                 | RT |  |                                                                                       | 15    | 5.9E-1  | 1.0E0     |
| <input type="checkbox"/> | GOTERM_BP_ALL   | <a href="#">neurite morphogenesis</a>                                                                        | RT |  |                                                                                       | 16    | 6.0E-1  | 1.0E0     |
| <input type="checkbox"/> | GOTERM_BP_ALL   | <a href="#">neuron morphogenesis during differentiation</a>                                                  | RT |  |                                                                                       | 16    | 6.0E-1  | 1.0E0     |
| <input type="checkbox"/> | GOTERM_BP_ALL   | <a href="#">nervous system development</a>                                                                   | RT |  |                                                                                       | 57    | 6.1E-1  | 1.0E0     |
| <input type="checkbox"/> | GOTERM_BP_ALL   | <a href="#">cell morphogenesis</a>                                                                           | RT |  |                                                                                       | 45    | 6.1E-1  | 1.0E0     |
| <input type="checkbox"/> | GOTERM_BP_ALL   | <a href="#">cellular structure morphogenesis</a>                                                             | RT |  |                                                                                       | 45    | 6.1E-1  | 1.0E0     |

| <input type="checkbox"/> | GOTERM_BP_ALL          | <a href="#">generation of neurons</a>                                            | <a href="#">RT</a> |  |  |  | 29    | 6.6E-1  | 1.0E0     |  |
|--------------------------|------------------------|----------------------------------------------------------------------------------|--------------------|--|--|--|-------|---------|-----------|--|
| <input type="checkbox"/> | GOTERM_BP_ALL          | <a href="#">neurogenesis</a>                                                     | <a href="#">RT</a> |  |  |  | 31    | 6.9E-1  | 1.0E0     |  |
| <input type="checkbox"/> | GOTERM_BP_ALL          | <a href="#">cellular morphogenesis during differentiation</a>                    | <a href="#">RT</a> |  |  |  | 17    | 6.9E-1  | 1.0E0     |  |
| <input type="checkbox"/> | GOTERM_BP_ALL          | <a href="#">cell projection morphogenesis</a>                                    | <a href="#">RT</a> |  |  |  | 24    | 7.2E-1  | 1.0E0     |  |
| <input type="checkbox"/> | GOTERM_BP_ALL          | <a href="#">cell projection organization and biogenesis</a>                      | <a href="#">RT</a> |  |  |  | 24    | 7.2E-1  | 1.0E0     |  |
| <input type="checkbox"/> | GOTERM_BP_ALL          | <a href="#">cell part morphogenesis</a>                                          | <a href="#">RT</a> |  |  |  | 24    | 7.2E-1  | 1.0E0     |  |
|                          | Annotation Cluster 204 | Enrichment Score: 0.24                                                           | <b>G</b>           |  |  |  | Count | P_Value | Benjamini |  |
| <input type="checkbox"/> | GOTERM_BP_ALL          | <a href="#">negative regulation of biosynthetic process</a>                      | <a href="#">RT</a> |  |  |  | 5     | 5.0E-1  | 1.0E0     |  |
| <input type="checkbox"/> | GOTERM_BP_ALL          | <a href="#">negative regulation of translation</a>                               | <a href="#">RT</a> |  |  |  | 4     | 5.1E-1  | 1.0E0     |  |
| <input type="checkbox"/> | GOTERM_BP_ALL          | <a href="#">negative regulation of cellular biosynthetic process</a>             | <a href="#">RT</a> |  |  |  | 4     | 5.7E-1  | 1.0E0     |  |
| <input type="checkbox"/> | GOTERM_BP_ALL          | <a href="#">negative regulation of protein metabolic process</a>                 | <a href="#">RT</a> |  |  |  | 7     | 7.8E-1  | 1.0E0     |  |
|                          | Annotation Cluster 205 | Enrichment Score: 0.24                                                           | <b>G</b>           |  |  |  | Count | P_Value | Benjamini |  |
| <input type="checkbox"/> | GOTERM_MF_ALL          | <a href="#">iron ion binding</a>                                                 | <a href="#">RT</a> |  |  |  | 29    | 4.6E-1  | 1.0E0     |  |
| <input type="checkbox"/> | SP_PIR_KEYWORDS        | <a href="#">iron</a>                                                             | <a href="#">RT</a> |  |  |  | 22    | 5.9E-1  | 1.0E0     |  |
| <input type="checkbox"/> | SP_PIR_KEYWORDS        | <a href="#">heme</a>                                                             | <a href="#">RT</a> |  |  |  | 10    | 7.2E-1  | 1.0E0     |  |
|                          | Annotation Cluster 206 | Enrichment Score: 0.23                                                           | <b>G</b>           |  |  |  | Count | P_Value | Benjamini |  |
| <input type="checkbox"/> | GOTERM_BP_ALL          | <a href="#">regulation of gene expression, epigenetic</a>                        | <a href="#">RT</a> |  |  |  | 6     | 5.4E-1  | 1.0E0     |  |
| <input type="checkbox"/> | GOTERM_BP_ALL          | <a href="#">DNA methylation</a>                                                  | <a href="#">RT</a> |  |  |  | 3     | 5.8E-1  | 1.0E0     |  |
| <input type="checkbox"/> | GOTERM_BP_ALL          | <a href="#">DNA alkylation</a>                                                   | <a href="#">RT</a> |  |  |  | 3     | 5.8E-1  | 1.0E0     |  |
| <input type="checkbox"/> | GOTERM_BP_ALL          | <a href="#">DNA modification</a>                                                 | <a href="#">RT</a> |  |  |  | 3     | 6.5E-1  | 1.0E0     |  |
|                          | Annotation Cluster 207 | Enrichment Score: 0.22                                                           | <b>G</b>           |  |  |  | Count | P_Value | Benjamini |  |
| <input type="checkbox"/> | GOTERM_MF_ALL          | <a href="#">translation elongation factor activity</a>                           | <a href="#">RT</a> |  |  |  | 5     | 2.9E-1  | 1.0E0     |  |
| <input type="checkbox"/> | SP_PIR_KEYWORDS        | <a href="#">Elongation factor</a>                                                | <a href="#">RT</a> |  |  |  | 4     | 3.3E-1  | 9.7E-1    |  |
| <input type="checkbox"/> | GOTERM_MF_ALL          | <a href="#">translation factor activity, nucleic acid binding</a>                | <a href="#">RT</a> |  |  |  | 11    | 6.0E-1  | 1.0E0     |  |
| <input type="checkbox"/> | GOTERM_MF_ALL          | <a href="#">translation regulator activity</a>                                   | <a href="#">RT</a> |  |  |  | 11    | 6.6E-1  | 1.0E0     |  |
| <input type="checkbox"/> | SP_PIR_KEYWORDS        | <a href="#">initiation factor</a>                                                | <a href="#">RT</a> |  |  |  | 5     | 8.4E-1  | 1.0E0     |  |
| <input type="checkbox"/> | GOTERM_MF_ALL          | <a href="#">translation initiation factor activity</a>                           | <a href="#">RT</a> |  |  |  | 5     | 9.3E-1  | 1.0E0     |  |
| <input type="checkbox"/> | SP_PIR_KEYWORDS        | <a href="#">protein biosynthesis</a>                                             | <a href="#">RT</a> |  |  |  | 5     | 1.0E0   | 1.0E0     |  |
|                          | Annotation Cluster 208 | Enrichment Score: 0.22                                                           | <b>G</b>           |  |  |  | Count | P_Value | Benjamini |  |
| <input type="checkbox"/> | GOTERM_MF_ALL          | <a href="#">nucleotide receptor activity, G-protein coupled</a>                  | <a href="#">RT</a> |  |  |  | 9     | 1.8E-1  | 9.9E-1    |  |
| <input type="checkbox"/> | GOTERM_MF_ALL          | <a href="#">nucleotide receptor activity</a>                                     | <a href="#">RT</a> |  |  |  | 9     | 1.9E-1  | 1.0E0     |  |
| <input type="checkbox"/> | INTERPRO               | <a href="#">P2 purinoceptor</a>                                                  | <a href="#">RT</a> |  |  |  | 3     | 4.9E-1  | 1.0E0     |  |
| <input type="checkbox"/> | SP_PIR_KEYWORDS        | <a href="#">g-protein coupled receptor</a>                                       | <a href="#">RT</a> |  |  |  | 28    | 8.0E-1  | 1.0E0     |  |
| <input type="checkbox"/> | SP_PIR_KEYWORDS        | <a href="#">transducer</a>                                                       | <a href="#">RT</a> |  |  |  | 31    | 8.3E-1  | 1.0E0     |  |
| <input type="checkbox"/> | GOTERM_MF_ALL          | <a href="#">G-protein coupled receptor activity</a>                              | <a href="#">RT</a> |  |  |  | 34    | 8.7E-1  | 1.0E0     |  |
| <input type="checkbox"/> | GOTERM_MF_ALL          | <a href="#">rhodopsin-like receptor activity</a>                                 | <a href="#">RT</a> |  |  |  | 27    | 8.8E-1  | 1.0E0     |  |
| <input type="checkbox"/> | GOTERM_MF_ALL          | <a href="#">transmembrane receptor activity</a>                                  | <a href="#">RT</a> |  |  |  | 60    | 9.0E-1  | 1.0E0     |  |
| <input type="checkbox"/> | GOTERM_BP_ALL          | <a href="#">G-protein coupled receptor protein signaling pathway</a>             | <a href="#">RT</a> |  |  |  | 47    | 9.2E-1  | 1.0E0     |  |
| <input type="checkbox"/> | INTERPRO               | <a href="#">Rhodopsin-like GPCR superfamily</a>                                  | <a href="#">RT</a> |  |  |  | 14    | 9.9E-1  | 1.0E0     |  |
|                          | Annotation Cluster 209 | Enrichment Score: 0.21                                                           | <b>G</b>           |  |  |  | Count | P_Value | Benjamini |  |
| <input type="checkbox"/> | SP_PIR_KEYWORDS        | <a href="#">tyrosine-specific phosphatase</a>                                    | <a href="#">RT</a> |  |  |  | 4     | 3.8E-1  | 9.8E-1    |  |
| <input type="checkbox"/> | INTERPRO               | <a href="#">Protein-tyrosine phosphatase, receptor/non-receptor type</a>         | <a href="#">RT</a> |  |  |  | 5     | 4.3E-1  | 1.0E0     |  |
| <input type="checkbox"/> | GOTERM_MF_ALL          | <a href="#">hydrolase activity, acting on ester bonds</a>                        | <a href="#">RT</a> |  |  |  | 55    | 4.8E-1  | 1.0E0     |  |
| <input type="checkbox"/> | GOTERM_MF_ALL          | <a href="#">protein tyrosine phosphatase activity</a>                            | <a href="#">RT</a> |  |  |  | 9     | 5.0E-1  | 1.0E0     |  |
| <input type="checkbox"/> | SMART                  | <a href="#">PTPc</a>                                                             | <a href="#">RT</a> |  |  |  | 5     | 5.1E-1  | 9.9E-1    |  |
| <input type="checkbox"/> | INTERPRO               | <a href="#">Protein-tyrosine phosphatase, Tyr-specific/dual-specificity type</a> | <a href="#">RT</a> |  |  |  | 8     | 5.4E-1  | 1.0E0     |  |
| <input type="checkbox"/> | GOTERM_MF_ALL          | <a href="#">phosphoprotein phosphatase activity</a>                              | <a href="#">RT</a> |  |  |  | 13    | 6.6E-1  | 1.0E0     |  |



|                          |                        |                                                                       |          |  |       |         |           |
|--------------------------|------------------------|-----------------------------------------------------------------------|----------|--|-------|---------|-----------|
| <input type="checkbox"/> | SP_PIR_KEYWORDS        | <a href="#">protein phosphatase</a>                                   | RT       |  | 9     | 6.8E-1  | 1.0E0     |
| <input type="checkbox"/> | UP_SEQ_FEATURE         | active site:Phosphocysteine intermediate                              | RT       |  | 5     | 7.1E-1  | 1.0E0     |
| <input type="checkbox"/> | GOTERM_BP_ALL          | <a href="#">protein amino acid dephosphorylation</a>                  | RT       |  | 10    | 7.4E-1  | 1.0E0     |
| <input type="checkbox"/> | GOTERM_MF_ALL          | <a href="#">phosphoric monoester hydrolase activity</a>               | RT       |  | 19    | 7.5E-1  | 1.0E0     |
| <input type="checkbox"/> | SP_PIR_KEYWORDS        | <a href="#">phosphoric monoester hydrolase</a>                        | RT       |  | 4     | 7.7E-1  | 1.0E0     |
| <input type="checkbox"/> | GOTERM_MF_ALL          | <a href="#">phosphoric ester hydrolase activity</a>                   | RT       |  | 23    | 8.1E-1  | 1.0E0     |
| <input type="checkbox"/> | GOTERM_BP_ALL          | <a href="#">dephosphorylation</a>                                     | RT       |  | 10    | 8.6E-1  | 1.0E0     |
|                          | Annotation Cluster 210 | Enrichment Score: 0.21                                                | <b>G</b> |  | Count | P_Value | Benjamini |
| <input type="checkbox"/> | GOTERM_BP_ALL          | <a href="#">regulation of translational initiation</a>                | RT       |  | 4     | 2.7E-1  | 9.7E-1    |
| <input type="checkbox"/> | SP_PIR_KEYWORDS        | <a href="#">translation regulation</a>                                | RT       |  | 4     | 4.5E-1  | 9.9E-1    |
| <input type="checkbox"/> | GOTERM_BP_ALL          | <a href="#">translational initiation</a>                              | RT       |  | 4     | 8.6E-1  | 1.0E0     |
| <input type="checkbox"/> | GOTERM_BP_ALL          | <a href="#">protein-RNA complex assembly</a>                          | RT       |  | 6     | 8.7E-1  | 1.0E0     |
| <input type="checkbox"/> | GOTERM_BP_ALL          | <a href="#">ribonucleoprotein complex biogenesis and assembly</a>     | RT       |  | 6     | 1.0E0   | 1.0E0     |
|                          | Annotation Cluster 211 | Enrichment Score: 0.21                                                | <b>G</b> |  | Count | P_Value | Benjamini |
| <input type="checkbox"/> | BIOCARTA               | <a href="#">TGF beta signaling pathway</a>                            | RT       |  | 4     | 3.7E-1  | 1.0E0     |
| <input type="checkbox"/> | KEGG_PATHWAY           | <a href="#">Adherens junction</a>                                     | RT       |  | 8     | 5.0E-1  | 9.0E-1    |
| <input type="checkbox"/> | BIOCARTA               | <a href="#">WNT Signaling Pathway</a>                                 | RT       |  | 3     | 8.3E-1  | 1.0E0     |
| <input type="checkbox"/> | KEGG_PATHWAY           | <a href="#">Cell cycle</a>                                            | RT       |  | 6     | 9.7E-1  | 1.0E0     |
|                          | Annotation Cluster 212 | Enrichment Score: 0.2                                                 | <b>G</b> |  | Count | P_Value | Benjamini |
| <input type="checkbox"/> | GOTERM_BP_ALL          | <a href="#">response to UV</a>                                        | RT       |  | 4     | 4.4E-1  | 9.9E-1    |
| <input type="checkbox"/> | GOTERM_BP_ALL          | <a href="#">response to radiation</a>                                 | RT       |  | 10    | 4.7E-1  | 1.0E0     |
| <input type="checkbox"/> | GOTERM_BP_ALL          | <a href="#">nucleotide-excision repair</a>                            | RT       |  | 3     | 6.5E-1  | 1.0E0     |
| <input type="checkbox"/> | GOTERM_BP_ALL          | <a href="#">response to light stimulus</a>                            | RT       |  | 7     | 6.5E-1  | 1.0E0     |
| <input type="checkbox"/> | GOTERM_BP_ALL          | <a href="#">response to abiotic stimulus</a>                          | RT       |  | 14    | 7.4E-1  | 1.0E0     |
| <input type="checkbox"/> | SP_PIR_KEYWORDS        | <a href="#">DNA repair</a>                                            | RT       |  | 8     | 9.3E-1  | 1.0E0     |
|                          | Annotation Cluster 213 | Enrichment Score: 0.2                                                 | <b>G</b> |  | Count | P_Value | Benjamini |
| <input type="checkbox"/> | SP_PIR_KEYWORDS        | <a href="#">aminotransferase</a>                                      | RT       |  | 3     | 5.9E-1  | 1.0E0     |
| <input type="checkbox"/> | GOTERM_MF_ALL          | <a href="#">transaminase activity</a>                                 | RT       |  | 4     | 6.2E-1  | 1.0E0     |
| <input type="checkbox"/> | GOTERM_MF_ALL          | <a href="#">transferase activity, transferring nitrogenous groups</a> | RT       |  | 4     | 6.8E-1  | 1.0E0     |
|                          | Annotation Cluster 214 | Enrichment Score: 0.2                                                 | <b>G</b> |  | Count | P_Value | Benjamini |
| <input type="checkbox"/> | GOTERM_BP_ALL          | <a href="#">sexual reproduction</a>                                   | RT       |  | 28    | 5.1E-1  | 1.0E0     |
| <input type="checkbox"/> | GOTERM_BP_ALL          | <a href="#">gamete generation</a>                                     | RT       |  | 23    | 5.5E-1  | 1.0E0     |
| <input type="checkbox"/> | GOTERM_BP_ALL          | <a href="#">spermatogenesis</a>                                       | RT       |  | 16    | 6.9E-1  | 1.0E0     |
| <input type="checkbox"/> | GOTERM_BP_ALL          | <a href="#">male gamete generation</a>                                | RT       |  | 16    | 6.9E-1  | 1.0E0     |
| <input type="checkbox"/> | GOTERM_BP_ALL          | <a href="#">reproduction</a>                                          | RT       |  | 37    | 7.5E-1  | 1.0E0     |
|                          | Annotation Cluster 215 | Enrichment Score: 0.2                                                 | <b>G</b> |  | Count | P_Value | Benjamini |
| <input type="checkbox"/> | INTERPRO               | <a href="#">Cyclin</a>                                                | RT       |  | 4     | 5.3E-1  | 1.0E0     |
| <input type="checkbox"/> | INTERPRO               | <a href="#">Cyclin-related</a>                                        | RT       |  | 4     | 5.5E-1  | 1.0E0     |
| <input type="checkbox"/> | SMART                  | <a href="#">CYCLIN</a>                                                | RT       |  | 4     | 6.4E-1  | 1.0E0     |
| <input type="checkbox"/> | INTERPRO               | <a href="#">Cyclin, N-terminal</a>                                    | RT       |  | 3     | 6.9E-1  | 1.0E0     |
| <input type="checkbox"/> | SP_PIR_KEYWORDS        | <a href="#">cyclin</a>                                                | RT       |  | 5     | 8.2E-1  | 1.0E0     |
|                          | Annotation Cluster 216 | Enrichment Score: 0.19                                                | <b>G</b> |  | Count | P_Value | Benjamini |
| <input type="checkbox"/> | GOTERM_BP_ALL          | <a href="#">muscle system process</a>                                 | RT       |  | 9     | 5.8E-1  | 1.0E0     |
| <input type="checkbox"/> | GOTERM_BP_ALL          | <a href="#">muscle contraction</a>                                    | RT       |  | 9     | 5.8E-1  | 1.0E0     |
| <input type="checkbox"/> | GOTERM_BP_ALL          | <a href="#">regulation of muscle contraction</a>                      | RT       |  | 3     | 8.2E-1  | 1.0E0     |
|                          | Annotation Cluster 217 | Enrichment Score: 0.18                                                | <b>G</b> |  | Count | P_Value | Benjamini |
| <input type="checkbox"/> | GOTERM_BP_ALL          | <a href="#">carbohydrate transport</a>                                | RT       |  | 8     | 4.1E-1  | 9.9E-1    |
| <input type="checkbox"/> | GOTERM_BP_ALL          | <a href="#">glucose transport</a>                                     | RT       |  | 3     | 7.6E-1  | 1.0E0     |
| <input type="checkbox"/> | GOTERM_BP_ALL          | <a href="#">hexose transport</a>                                      | RT       |  | 3     | 7.8E-1  | 1.0E0     |

| <input type="checkbox"/> | GOTERM_BP_ALL          | <a href="#">monosaccharide transport</a>                       | <a href="#">RT</a> |  |  |  |  | 3     | 7.8E-1  | 1.0E0     |
|--------------------------|------------------------|----------------------------------------------------------------|--------------------|--|--|--|--|-------|---------|-----------|
|                          | Annotation Cluster 218 | Enrichment Score: 0.18                                         | <b>G</b>           |  |  |  |  | Count | P_Value | Benjamini |
| <input type="checkbox"/> | INTERPRO               | <a href="#">Ras small GTPase, Rab type</a>                     | <a href="#">RT</a> |  |  |  |  | 8     | 2.3E-1  | 1.0E0     |
| <input type="checkbox"/> | SMART                  | <a href="#">RAB</a>                                            | <a href="#">RT</a> |  |  |  |  | 8     | 3.3E-1  | 9.6E-1    |
| <input type="checkbox"/> | PIR_SUPERFAMILY        | PIRSF001710:Ras-related protein Rab                            | <a href="#">RT</a> |  |  |  |  | 7     | 4.3E-1  | 1.0E0     |
| <input type="checkbox"/> | UP_SEQ_FEATURE         | lipid moiety-binding region:S-geranylgeranyl cysteine          | <a href="#">RT</a> |  |  |  |  | 8     | 6.4E-1  | 1.0E0     |
| <input type="checkbox"/> | INTERPRO               | <a href="#">Ras</a>                                            | <a href="#">RT</a> |  |  |  |  | 10    | 6.6E-1  | 1.0E0     |
| <input type="checkbox"/> | SP_PIR_KEYWORDS        | <a href="#">prenylation</a>                                    | <a href="#">RT</a> |  |  |  |  | 11    | 7.5E-1  | 1.0E0     |
| <input type="checkbox"/> | INTERPRO               | <a href="#">Small GTP-binding protein domain</a>               | <a href="#">RT</a> |  |  |  |  | 11    | 8.0E-1  | 1.0E0     |
| <input type="checkbox"/> | GOTERM_MF_ALL          | <a href="#">GTP binding</a>                                    | <a href="#">RT</a> |  |  |  |  | 25    | 8.3E-1  | 1.0E0     |
| <input type="checkbox"/> | GOTERM_MF_ALL          | <a href="#">guanyl ribonucleotide binding</a>                  | <a href="#">RT</a> |  |  |  |  | 25    | 8.5E-1  | 1.0E0     |
| <input type="checkbox"/> | GOTERM_MF_ALL          | <a href="#">guanyl nucleotide binding</a>                      | <a href="#">RT</a> |  |  |  |  | 25    | 8.5E-1  | 1.0E0     |
| <input type="checkbox"/> | UP_SEQ_FEATURE         | short sequence motif:Effector region                           | <a href="#">RT</a> |  |  |  |  | 6     | 8.6E-1  | 1.0E0     |
| <input type="checkbox"/> | INTERPRO               | <a href="#">Ras GTPase</a>                                     | <a href="#">RT</a> |  |  |  |  | 10    | 8.8E-1  | 1.0E0     |
| <input type="checkbox"/> | UP_SEQ_FEATURE         | nucleotide phosphate-binding region:GTP                        | <a href="#">RT</a> |  |  |  |  | 14    | 9.1E-1  | 1.0E0     |
| <input type="checkbox"/> | SP_PIR_KEYWORDS        | <a href="#">GTP-binding</a>                                    | <a href="#">RT</a> |  |  |  |  | 18    | 9.4E-1  | 1.0E0     |
|                          | Annotation Cluster 219 | Enrichment Score: 0.17                                         | <b>G</b>           |  |  |  |  | Count | P_Value | Benjamini |
| <input type="checkbox"/> | PIR_SUPERFAMILY        | PIRSF036848:conserved protein with F-box/LRR-repeat, Skp2 type | <a href="#">RT</a> |  |  |  |  | 3     | 9.1E-2  | 1.0E0     |
| <input type="checkbox"/> | UP_SEQ_FEATURE         | domain:F-box                                                   | <a href="#">RT</a> |  |  |  |  | 7     | 2.5E-1  | 1.0E0     |
| <input type="checkbox"/> | SMART                  | <a href="#">FBOX</a>                                           | <a href="#">RT</a> |  |  |  |  | 8     | 3.7E-1  | 9.7E-1    |
| <input type="checkbox"/> | INTERPRO               | <a href="#">Cyclin-like F-box</a>                              | <a href="#">RT</a> |  |  |  |  | 7     | 4.0E-1  | 1.0E0     |
| <input type="checkbox"/> | UP_SEQ_FEATURE         | repeat:LRR 3                                                   | <a href="#">RT</a> |  |  |  |  | 7     | 8.7E-1  | 1.0E0     |
| <input type="checkbox"/> | UP_SEQ_FEATURE         | repeat:LRR 12                                                  | <a href="#">RT</a> |  |  |  |  | 3     | 8.7E-1  | 1.0E0     |
| <input type="checkbox"/> | UP_SEQ_FEATURE         | repeat:LRR 1                                                   | <a href="#">RT</a> |  |  |  |  | 7     | 8.9E-1  | 1.0E0     |
| <input type="checkbox"/> | UP_SEQ_FEATURE         | repeat:LRR 2                                                   | <a href="#">RT</a> |  |  |  |  | 7     | 8.9E-1  | 1.0E0     |
| <input type="checkbox"/> | SP_PIR_KEYWORDS        | <a href="#">leucine-rich repeat</a>                            | <a href="#">RT</a> |  |  |  |  | 15    | 8.9E-1  | 1.0E0     |
| <input type="checkbox"/> | UP_SEQ_FEATURE         | repeat:LRR 4                                                   | <a href="#">RT</a> |  |  |  |  | 6     | 8.9E-1  | 1.0E0     |
| <input type="checkbox"/> | UP_SEQ_FEATURE         | repeat:LRR 11                                                  | <a href="#">RT</a> |  |  |  |  | 3     | 9.1E-1  | 1.0E0     |
| <input type="checkbox"/> | UP_SEQ_FEATURE         | repeat:LRR 5                                                   | <a href="#">RT</a> |  |  |  |  | 5     | 9.2E-1  | 1.0E0     |
| <input type="checkbox"/> | UP_SEQ_FEATURE         | repeat:LRR 10                                                  | <a href="#">RT</a> |  |  |  |  | 3     | 9.3E-1  | 1.0E0     |
| <input type="checkbox"/> | UP_SEQ_FEATURE         | repeat:LRR 9                                                   | <a href="#">RT</a> |  |  |  |  | 3     | 9.6E-1  | 1.0E0     |
| <input type="checkbox"/> | UP_SEQ_FEATURE         | repeat:LRR 8                                                   | <a href="#">RT</a> |  |  |  |  | 3     | 9.7E-1  | 1.0E0     |
| <input type="checkbox"/> | UP_SEQ_FEATURE         | repeat:LRR 7                                                   | <a href="#">RT</a> |  |  |  |  | 3     | 9.8E-1  | 1.0E0     |
| <input type="checkbox"/> | UP_SEQ_FEATURE         | repeat:LRR 6                                                   | <a href="#">RT</a> |  |  |  |  | 3     | 9.9E-1  | 1.0E0     |
|                          | Annotation Cluster 220 | Enrichment Score: 0.17                                         | <b>G</b>           |  |  |  |  | Count | P_Value | Benjamini |
| <input type="checkbox"/> | GOTERM_BP_ALL          | <a href="#">sulfur amino acid metabolic process</a>            | <a href="#">RT</a> |  |  |  |  | 3     | 5.0E-1  | 1.0E0     |
| <input type="checkbox"/> | GOTERM_BP_ALL          | <a href="#">sulfur metabolic process</a>                       | <a href="#">RT</a> |  |  |  |  | 7     | 7.1E-1  | 1.0E0     |
| <input type="checkbox"/> | GOTERM_BP_ALL          | <a href="#">sulfur compound biosynthetic process</a>           | <a href="#">RT</a> |  |  |  |  | 3     | 9.0E-1  | 1.0E0     |
|                          | Annotation Cluster 221 | Enrichment Score: 0.16                                         | <b>G</b>           |  |  |  |  | Count | P_Value | Benjamini |
| <input type="checkbox"/> | GOTERM_BP_ALL          | <a href="#">hexose biosynthetic process</a>                    | <a href="#">RT</a> |  |  |  |  | 3     | 6.7E-1  | 1.0E0     |
| <input type="checkbox"/> | GOTERM_BP_ALL          | <a href="#">monosaccharide biosynthetic process</a>            | <a href="#">RT</a> |  |  |  |  | 3     | 7.1E-1  | 1.0E0     |
| <input type="checkbox"/> | GOTERM_BP_ALL          | <a href="#">alcohol biosynthetic process</a>                   | <a href="#">RT</a> |  |  |  |  | 3     | 7.1E-1  | 1.0E0     |
|                          | Annotation Cluster 222 | Enrichment Score: 0.16                                         | <b>G</b>           |  |  |  |  | Count | P_Value | Benjamini |
| <input type="checkbox"/> | GOTERM_BP_ALL          | <a href="#">photoreceptor cell maintenance</a>                 | <a href="#">RT</a> |  |  |  |  | 3     | 2.4E-1  | 9.7E-1    |
| <input type="checkbox"/> | GOTERM_BP_ALL          | <a href="#">visual perception</a>                              | <a href="#">RT</a> |  |  |  |  | 5     | 9.8E-1  | 1.0E0     |
| <input type="checkbox"/> | GOTERM_BP_ALL          | <a href="#">sensory perception of light stimulus</a>           | <a href="#">RT</a> |  |  |  |  | 5     | 9.8E-1  | 1.0E0     |
| <input type="checkbox"/> | GOTERM_BP_ALL          | <a href="#">sensory perception</a>                             | <a href="#">RT</a> |  |  |  |  | 13    | 1.0E0   | 1.0E0     |
|                          | Annotation Cluster 223 | Enrichment Score: 0.16                                         | <b>G</b>           |  |  |  |  | Count | P_Value | Benjamini |
| <input type="checkbox"/> | INTERPRO               | <a href="#">Calcium-binding EF-hand</a>                        | <a href="#">RT</a> |  |  |  |  | 16    | 6.1E-1  | 1.0E0     |

|                          |                 |                                                                      |                        |          |     |        |         |           |
|--------------------------|-----------------|----------------------------------------------------------------------|------------------------|----------|-----|--------|---------|-----------|
| <input type="checkbox"/> | INTERPRO        | <a href="#">EF-Hand type</a>                                         | <a href="#">RT</a>     |          | 15  | 6.2E-1 | 1.0E0   |           |
| <input type="checkbox"/> | UP_SEQ_FEATURE  | calcium-binding region:2                                             | <a href="#">RT</a>     |          | 7   | 6.8E-1 | 1.0E0   |           |
| <input type="checkbox"/> | UP_SEQ_FEATURE  | domain:EF-hand 1                                                     | <a href="#">RT</a>     |          | 9   | 7.2E-1 | 1.0E0   |           |
| <input type="checkbox"/> | UP_SEQ_FEATURE  | calcium-binding region:1                                             | <a href="#">RT</a>     |          | 7   | 7.2E-1 | 1.0E0   |           |
| <input type="checkbox"/> | UP_SEQ_FEATURE  | domain:EF-hand 2                                                     | <a href="#">RT</a>     |          | 9   | 7.3E-1 | 1.0E0   |           |
| <input type="checkbox"/> | SMART           | <a href="#">EFh</a>                                                  | <a href="#">RT</a>     |          | 16  | 8.3E-1 | 1.0E0   |           |
|                          |                 | Annotation Cluster 224                                               | Enrichment Score: 0.15 | <b>G</b> |     | Count  | P_Value | Benjamini |
| <input type="checkbox"/> | GOTERM_CC_ALL   | <a href="#">synapse</a>                                              | <a href="#">RT</a>     |          | 22  | 4.5E-1 | 1.0E0   |           |
| <input type="checkbox"/> | SP_PIR_KEYWORDS | <a href="#">synapse</a>                                              | <a href="#">RT</a>     |          | 13  | 7.4E-1 | 1.0E0   |           |
| <input type="checkbox"/> | GOTERM_CC_ALL   | <a href="#">cell junction</a>                                        | <a href="#">RT</a>     |          | 30  | 7.6E-1 | 1.0E0   |           |
| <input type="checkbox"/> | SP_PIR_KEYWORDS | <a href="#">cell junction</a>                                        | <a href="#">RT</a>     |          | 18  | 9.5E-1 | 1.0E0   |           |
|                          |                 | Annotation Cluster 225                                               | Enrichment Score: 0.15 | <b>G</b> |     | Count  | P_Value | Benjamini |
| <input type="checkbox"/> | INTERPRO        | <a href="#">DNA/RNA helicase, ATP-dependent, DEAH-box type</a>       | <a href="#">RT</a>     |          | 4   | 3.9E-1 | 1.0E0   |           |
| <input type="checkbox"/> | INTERPRO        | <a href="#">SNF2-related</a>                                         | <a href="#">RT</a>     |          | 4   | 4.4E-1 | 1.0E0   |           |
| <input type="checkbox"/> | SP_PIR_KEYWORDS | <a href="#">helicase</a>                                             | <a href="#">RT</a>     |          | 11  | 4.8E-1 | 9.9E-1  |           |
| <input type="checkbox"/> | GOTERM_MF_ALL   | <a href="#">helicase activity</a>                                    | <a href="#">RT</a>     |          | 12  | 6.3E-1 | 1.0E0   |           |
| <input type="checkbox"/> | GOTERM_MF_ALL   | <a href="#">ATP-dependent helicase activity</a>                      | <a href="#">RT</a>     |          | 8   | 7.8E-1 | 1.0E0   |           |
| <input type="checkbox"/> | INTERPRO        | <a href="#">DNA/RNA helicase, C-terminal</a>                         | <a href="#">RT</a>     |          | 6   | 8.2E-1 | 1.0E0   |           |
| <input type="checkbox"/> | SMART           | <a href="#">DEXDc</a>                                                | <a href="#">RT</a>     |          | 8   | 8.3E-1 | 1.0E0   |           |
| <input type="checkbox"/> | SMART           | <a href="#">HELICc</a>                                               | <a href="#">RT</a>     |          | 7   | 8.3E-1 | 1.0E0   |           |
| <input type="checkbox"/> | INTERPRO        | <a href="#">Helicase, superfamily 1 and 2, ATP-binding</a>           | <a href="#">RT</a>     |          | 6   | 8.4E-1 | 1.0E0   |           |
| <input type="checkbox"/> | INTERPRO        | <a href="#">DEAD-like helicase, N-terminal</a>                       | <a href="#">RT</a>     |          | 6   | 8.8E-1 | 1.0E0   |           |
| <input type="checkbox"/> | UP_SEQ_FEATURE  | domain:Helicase C-terminal                                           | <a href="#">RT</a>     |          | 3   | 9.4E-1 | 1.0E0   |           |
| <input type="checkbox"/> | UP_SEQ_FEATURE  | domain:Helicase ATP-binding                                          | <a href="#">RT</a>     |          | 3   | 9.5E-1 | 1.0E0   |           |
|                          |                 | Annotation Cluster 226                                               | Enrichment Score: 0.15 | <b>G</b> |     | Count  | P_Value | Benjamini |
| <input type="checkbox"/> | INTERPRO        | <a href="#">Heat shock protein DnaJ, N-terminal</a>                  | <a href="#">RT</a>     |          | 5   | 4.7E-1 | 1.0E0   |           |
| <input type="checkbox"/> | GOTERM_MF_ALL   | <a href="#">heat shock protein binding</a>                           | <a href="#">RT</a>     |          | 6   | 5.4E-1 | 1.0E0   |           |
| <input type="checkbox"/> | SMART           | <a href="#">DnaJ</a>                                                 | <a href="#">RT</a>     |          | 5   | 6.1E-1 | 1.0E0   |           |
| <input type="checkbox"/> | UP_SEQ_FEATURE  | domain:J                                                             | <a href="#">RT</a>     |          | 3   | 7.0E-1 | 1.0E0   |           |
| <input type="checkbox"/> | INTERPRO        | <a href="#">Molecular chaperone, heat shock protein, Hsp40, DnaJ</a> | <a href="#">RT</a>     |          | 3   | 7.9E-1 | 1.0E0   |           |
| <input type="checkbox"/> | SP_PIR_KEYWORDS | <a href="#">chaperone</a>                                            | <a href="#">RT</a>     |          | 5   | 9.9E-1 | 1.0E0   |           |
| <input type="checkbox"/> | GOTERM_BP_ALL   | <a href="#">protein folding</a>                                      | <a href="#">RT</a>     |          | 8   | 1.0E0  | 1.0E0   |           |
|                          |                 | Annotation Cluster 227                                               | Enrichment Score: 0.15 | <b>G</b> |     | Count  | P_Value | Benjamini |
| <input type="checkbox"/> | GOTERM_CC_ALL   | <a href="#">plasma membrane part</a>                                 | <a href="#">RT</a>     |          | 110 | 5.1E-1 | 1.0E0   |           |
| <input type="checkbox"/> | GOTERM_CC_ALL   | <a href="#">integral to plasma membrane</a>                          | <a href="#">RT</a>     |          | 46  | 8.2E-1 | 1.0E0   |           |
| <input type="checkbox"/> | GOTERM_CC_ALL   | <a href="#">intrinsic to plasma membrane</a>                         | <a href="#">RT</a>     |          | 47  | 8.4E-1 | 1.0E0   |           |
|                          |                 | Annotation Cluster 228                                               | Enrichment Score: 0.15 | <b>G</b> |     | Count  | P_Value | Benjamini |
| <input type="checkbox"/> | PIR_SUPERFAMILY | PIRSF000050:cytochrome P450 CYP4B1                                   | <a href="#">RT</a>     |          | 3   | 1.8E-1 | 1.0E0   |           |
| <input type="checkbox"/> | SP_PIR_KEYWORDS | <a href="#">heme</a>                                                 | <a href="#">RT</a>     |          | 10  | 7.2E-1 | 1.0E0   |           |
| <input type="checkbox"/> | INTERPRO        | <a href="#">Cytochrome P450</a>                                      | <a href="#">RT</a>     |          | 6   | 7.6E-1 | 1.0E0   |           |
| <input type="checkbox"/> | INTERPRO        | <a href="#">Cytochrome P450, E-class, group I</a>                    | <a href="#">RT</a>     |          | 5   | 8.1E-1 | 1.0E0   |           |
| <input type="checkbox"/> | SP_PIR_KEYWORDS | <a href="#">monooxygenase</a>                                        | <a href="#">RT</a>     |          | 6   | 9.2E-1 | 1.0E0   |           |
| <input type="checkbox"/> | GOTERM_MF_ALL   | <a href="#">tetrapyrrole binding</a>                                 | <a href="#">RT</a>     |          | 10  | 9.5E-1 | 1.0E0   |           |
| <input type="checkbox"/> | GOTERM_MF_ALL   | <a href="#">heme binding</a>                                         | <a href="#">RT</a>     |          | 10  | 9.5E-1 | 1.0E0   |           |
| <input type="checkbox"/> | GOTERM_MF_ALL   | <a href="#">monooxygenase activity</a>                               | <a href="#">RT</a>     |          | 6   | 9.8E-1 | 1.0E0   |           |
|                          |                 | Annotation Cluster 229                                               | Enrichment Score: 0.15 | <b>G</b> |     | Count  | P_Value | Benjamini |
| <input type="checkbox"/> | GOTERM_BP_ALL   | <a href="#">circulatory system process</a>                           | <a href="#">RT</a>     |          | 12  | 4.6E-1 | 1.0E0   |           |
| <input type="checkbox"/> | GOTERM_BP_ALL   | <a href="#">blood circulation</a>                                    | <a href="#">RT</a>     |          | 12  | 4.6E-1 | 1.0E0   |           |
| <input type="checkbox"/> | GOTERM_BP_ALL   | <a href="#">regulation of blood vessel size</a>                      | <a href="#">RT</a>     |          | 4   | 7.6E-1 | 1.0E0   |           |

|                          |                 |                                                                                             |                    |  |       |         |           |
|--------------------------|-----------------|---------------------------------------------------------------------------------------------|--------------------|--|-------|---------|-----------|
| <input type="checkbox"/> | GOTERM_BP_ALL   | <a href="#">regulation of tube size</a>                                                     | <a href="#">RT</a> |  | 4     | 7.6E-1  | 1.0E0     |
| <input type="checkbox"/> | GOTERM_BP_ALL   | <a href="#">vascular process in circulatory system</a>                                      | <a href="#">RT</a> |  | 4     | 7.6E-1  | 1.0E0     |
| <input type="checkbox"/> | GOTERM_BP_ALL   | <a href="#">heart process</a>                                                               | <a href="#">RT</a> |  | 4     | 8.2E-1  | 1.0E0     |
| <input type="checkbox"/> | GOTERM_BP_ALL   | <a href="#">heart contraction</a>                                                           | <a href="#">RT</a> |  | 4     | 8.2E-1  | 1.0E0     |
| <input type="checkbox"/> | GOTERM_BP_ALL   | <a href="#">regulation of blood pressure</a>                                                | <a href="#">RT</a> |  | 4     | 8.6E-1  | 1.0E0     |
| <input type="checkbox"/> | GOTERM_BP_ALL   | <a href="#">regulation of heart contraction</a>                                             | <a href="#">RT</a> |  | 3     | 8.9E-1  | 1.0E0     |
| Annotation Cluster 230   |                 | Enrichment Score: 0.14                                                                      | <b>G</b>           |  | Count | P_Value | Benjamini |
| <input type="checkbox"/> | INTERPRO        | <a href="#">Sterile alpha motif homology 2</a>                                              | <a href="#">RT</a> |  | 4     | 5.3E-1  | 1.0E0     |
| <input type="checkbox"/> | UP_SEQ_FEATURE  | domain:SAM                                                                                  | <a href="#">RT</a> |  | 4     | 6.3E-1  | 1.0E0     |
| <input type="checkbox"/> | INTERPRO        | <a href="#">Sterile alpha motif SAM</a>                                                     | <a href="#">RT</a> |  | 6     | 7.7E-1  | 1.0E0     |
| <input type="checkbox"/> | SMART           | <a href="#">SAM</a>                                                                         | <a href="#">RT</a> |  | 6     | 8.5E-1  | 1.0E0     |
| <input type="checkbox"/> | INTERPRO        | <a href="#">Sterile alpha motif-type</a>                                                    | <a href="#">RT</a> |  | 4     | 9.0E-1  | 1.0E0     |
| Annotation Cluster 231   |                 | Enrichment Score: 0.14                                                                      | <b>G</b>           |  | Count | P_Value | Benjamini |
| <input type="checkbox"/> | GOTERM_MF_ALL   | <a href="#">glutathione transferase activity</a>                                            | <a href="#">RT</a> |  | 3     | 6.0E-1  | 1.0E0     |
| <input type="checkbox"/> | KEGG_PATHWAY    | <a href="#">Glutathione metabolism</a>                                                      | <a href="#">RT</a> |  | 4     | 6.6E-1  | 9.6E-1    |
| <input type="checkbox"/> | GOTERM_MF_ALL   | <a href="#">transferase activity, transferring alkyl or aryl (other than methyl) groups</a> | <a href="#">RT</a> |  | 5     | 7.3E-1  | 1.0E0     |
| <input type="checkbox"/> | KEGG_PATHWAY    | <a href="#">Metabolism of xenobiotics by cytochrome P450</a>                                | <a href="#">RT</a> |  | 4     | 9.4E-1  | 1.0E0     |
| Annotation Cluster 232   |                 | Enrichment Score: 0.14                                                                      | <b>G</b>           |  | Count | P_Value | Benjamini |
| <input type="checkbox"/> | KEGG_PATHWAY    | <a href="#">Fructose and mannose metabolism</a>                                             | <a href="#">RT</a> |  | 6     | 3.6E-1  | 8.7E-1    |
| <input type="checkbox"/> | GOTERM_BP_ALL   | <a href="#">glucose metabolic process</a>                                                   | <a href="#">RT</a> |  | 12    | 3.7E-1  | 9.9E-1    |
| <input type="checkbox"/> | GOTERM_BP_ALL   | <a href="#">carbohydrate catabolic process</a>                                              | <a href="#">RT</a> |  | 7     | 7.2E-1  | 1.0E0     |
| <input type="checkbox"/> | GOTERM_BP_ALL   | <a href="#">cellular carbohydrate catabolic process</a>                                     | <a href="#">RT</a> |  | 6     | 8.1E-1  | 1.0E0     |
| <input type="checkbox"/> | GOTERM_BP_ALL   | <a href="#">glycolysis</a>                                                                  | <a href="#">RT</a> |  | 4     | 8.6E-1  | 1.0E0     |
| <input type="checkbox"/> | SP_PIR_KEYWORDS | <a href="#">glycolysis</a>                                                                  | <a href="#">RT</a> |  | 3     | 8.8E-1  | 1.0E0     |
| <input type="checkbox"/> | GOTERM_BP_ALL   | <a href="#">glucose catabolic process</a>                                                   | <a href="#">RT</a> |  | 4     | 9.2E-1  | 1.0E0     |
| <input type="checkbox"/> | GOTERM_BP_ALL   | <a href="#">monosaccharide catabolic process</a>                                            | <a href="#">RT</a> |  | 4     | 9.2E-1  | 1.0E0     |
| <input type="checkbox"/> | GOTERM_BP_ALL   | <a href="#">hexose catabolic process</a>                                                    | <a href="#">RT</a> |  | 4     | 9.2E-1  | 1.0E0     |
| <input type="checkbox"/> | GOTERM_BP_ALL   | <a href="#">alcohol catabolic process</a>                                                   | <a href="#">RT</a> |  | 4     | 9.3E-1  | 1.0E0     |
| Annotation Cluster 233   |                 | Enrichment Score: 0.14                                                                      | <b>G</b>           |  | Count | P_Value | Benjamini |
| <input type="checkbox"/> | GOTERM_BP_ALL   | <a href="#">actin polymerization and/or depolymerization</a>                                | <a href="#">RT</a> |  | 6     | 4.3E-1  | 9.9E-1    |
| <input type="checkbox"/> | GOTERM_BP_ALL   | <a href="#">regulation of cellular component organization and biogenesis</a>                | <a href="#">RT</a> |  | 7     | 6.0E-1  | 1.0E0     |
| <input type="checkbox"/> | GOTERM_BP_ALL   | <a href="#">negative regulation of actin filament depolymerization</a>                      | <a href="#">RT</a> |  | 3     | 6.0E-1  | 1.0E0     |
| <input type="checkbox"/> | GOTERM_BP_ALL   | <a href="#">actin filament capping</a>                                                      | <a href="#">RT</a> |  | 3     | 6.0E-1  | 1.0E0     |
| <input type="checkbox"/> | GOTERM_BP_ALL   | <a href="#">actin filament depolymerization</a>                                             | <a href="#">RT</a> |  | 3     | 6.5E-1  | 1.0E0     |
| <input type="checkbox"/> | GOTERM_BP_ALL   | <a href="#">regulation of actin filament depolymerization</a>                               | <a href="#">RT</a> |  | 3     | 6.5E-1  | 1.0E0     |
| <input type="checkbox"/> | GOTERM_BP_ALL   | <a href="#">regulation of cellular component size</a>                                       | <a href="#">RT</a> |  | 4     | 7.1E-1  | 1.0E0     |
| <input type="checkbox"/> | GOTERM_BP_ALL   | <a href="#">negative regulation of protein metabolic process</a>                            | <a href="#">RT</a> |  | 7     | 7.8E-1  | 1.0E0     |
| <input type="checkbox"/> | GOTERM_BP_ALL   | <a href="#">protein depolymerization</a>                                                    | <a href="#">RT</a> |  | 3     | 8.5E-1  | 1.0E0     |
| <input type="checkbox"/> | GOTERM_BP_ALL   | <a href="#">regulation of actin polymerization and/or depolymerization</a>                  | <a href="#">RT</a> |  | 3     | 8.7E-1  | 1.0E0     |
| <input type="checkbox"/> | GOTERM_BP_ALL   | <a href="#">negative regulation of cellular component organization and biogenesis</a>       | <a href="#">RT</a> |  | 3     | 8.8E-1  | 1.0E0     |
| <input type="checkbox"/> | GOTERM_BP_ALL   | <a href="#">regulation of actin cytoskeleton organization and biogenesis</a>                | <a href="#">RT</a> |  | 3     | 8.8E-1  | 1.0E0     |
| <input type="checkbox"/> | GOTERM_BP_ALL   | <a href="#">regulation of actin filament length</a>                                         | <a href="#">RT</a> |  | 3     | 8.8E-1  | 1.0E0     |
| <input type="checkbox"/> | GOTERM_BP_ALL   | <a href="#">regulation of cytoskeleton organization and biogenesis</a>                      | <a href="#">RT</a> |  | 3     | 9.1E-1  | 1.0E0     |
| <input type="checkbox"/> | GOTERM_BP_ALL   | <a href="#">regulation of organelle organization and biogenesis</a>                         | <a href="#">RT</a> |  | 3     | 9.1E-1  | 1.0E0     |
| Annotation Cluster 234   |                 | Enrichment Score: 0.13                                                                      | <b>G</b>           |  | Count | P_Value | Benjamini |
| <input type="checkbox"/> | GOTERM_BP_ALL   | <a href="#">amino sugar metabolic process</a>                                               | <a href="#">RT</a> |  | 4     | 4.6E-1  | 9.9E-1    |

| <input type="checkbox"/> | Category               | Term                                                                                               | RT       | Bar | Count | P_Value | Benjamini |
|--------------------------|------------------------|----------------------------------------------------------------------------------------------------|----------|-----|-------|---------|-----------|
| <input type="checkbox"/> | GOTERM_BP_ALL          | <a href="#">cellular polysaccharide metabolic process</a>                                          | RT       |     | 3     | 9.5E-1  | 1.0E0     |
| <input type="checkbox"/> | GOTERM_BP_ALL          | <a href="#">polysaccharide metabolic process</a>                                                   | RT       |     | 3     | 9.5E-1  | 1.0E0     |
|                          | Annotation Cluster 235 | Enrichment Score: 0.13                                                                             | <b>G</b> |     | Count | P_Value | Benjamini |
| <input type="checkbox"/> | SP_PIR_KEYWORDS        | <a href="#">phosphatidylinositol linkage</a>                                                       | RT       |     | 3     | 3.0E-1  | 9.7E-1    |
| <input type="checkbox"/> | UP_SEQ_FEATURE         | lipid moiety-binding region:GPI-anchor amidated serine                                             | RT       |     | 3     | 9.1E-1  | 1.0E0     |
| <input type="checkbox"/> | SP_PIR_KEYWORDS        | <a href="#">gpi-anchor</a>                                                                         | RT       |     | 7     | 9.2E-1  | 1.0E0     |
| <input type="checkbox"/> | GOTERM_MF_ALL          | <a href="#">GPI anchor binding</a>                                                                 | RT       |     | 7     | 9.4E-1  | 1.0E0     |
| <input type="checkbox"/> | UP_SEQ_FEATURE         | propeptide:Removed in mature form                                                                  | RT       |     | 8     | 9.8E-1  | 1.0E0     |
|                          | Annotation Cluster 236 | Enrichment Score: 0.12                                                                             | <b>G</b> |     | Count | P_Value | Benjamini |
| <input type="checkbox"/> | GOTERM_BP_ALL          | <a href="#">neural tube development</a>                                                            | RT       |     | 6     | 4.9E-1  | 1.0E0     |
| <input type="checkbox"/> | GOTERM_BP_ALL          | <a href="#">neural tube formation</a>                                                              | RT       |     | 4     | 7.1E-1  | 1.0E0     |
| <input type="checkbox"/> | GOTERM_BP_ALL          | <a href="#">neural plate morphogenesis</a>                                                         | RT       |     | 4     | 7.3E-1  | 1.0E0     |
| <input type="checkbox"/> | GOTERM_BP_ALL          | <a href="#">neural plate development</a>                                                           | RT       |     | 4     | 7.4E-1  | 1.0E0     |
| <input type="checkbox"/> | GOTERM_BP_ALL          | <a href="#">embryonic epithelial tube formation</a>                                                | RT       |     | 4     | 7.6E-1  | 1.0E0     |
| <input type="checkbox"/> | GOTERM_BP_ALL          | <a href="#">neural tube closure</a>                                                                | RT       |     | 3     | 7.8E-1  | 1.0E0     |
| <input type="checkbox"/> | GOTERM_BP_ALL          | <a href="#">primary neural tube formation</a>                                                      | RT       |     | 3     | 8.0E-1  | 1.0E0     |
| <input type="checkbox"/> | GOTERM_BP_ALL          | <a href="#">morphogenesis of embryonic epithelium</a>                                              | RT       |     | 4     | 9.1E-1  | 1.0E0     |
| <input type="checkbox"/> | GOTERM_BP_ALL          | <a href="#">morphogenesis of an epithelium</a>                                                     | RT       |     | 7     | 9.4E-1  | 1.0E0     |
|                          | Annotation Cluster 237 | Enrichment Score: 0.12                                                                             | <b>G</b> |     | Count | P_Value | Benjamini |
| <input type="checkbox"/> | GOTERM_BP_ALL          | <a href="#">secondary metabolic process</a>                                                        | RT       |     | 5     | 6.7E-1  | 1.0E0     |
| <input type="checkbox"/> | GOTERM_BP_ALL          | <a href="#">pigment biosynthetic process</a>                                                       | RT       |     | 3     | 7.6E-1  | 1.0E0     |
| <input type="checkbox"/> | GOTERM_BP_ALL          | <a href="#">pigment metabolic process</a>                                                          | RT       |     | 3     | 8.4E-1  | 1.0E0     |
|                          | Annotation Cluster 238 | Enrichment Score: 0.12                                                                             | <b>G</b> |     | Count | P_Value | Benjamini |
| <input type="checkbox"/> | GOTERM_CC_ALL          | <a href="#">mitochondrial outer membrane</a>                                                       | RT       |     | 3     | 7.1E-1  | 1.0E0     |
| <input type="checkbox"/> | GOTERM_CC_ALL          | <a href="#">organelle outer membrane</a>                                                           | RT       |     | 3     | 7.6E-1  | 1.0E0     |
| <input type="checkbox"/> | GOTERM_CC_ALL          | <a href="#">outer membrane</a>                                                                     | RT       |     | 6     | 8.1E-1  | 1.0E0     |
|                          | Annotation Cluster 239 | Enrichment Score: 0.12                                                                             | <b>G</b> |     | Count | P_Value | Benjamini |
| <input type="checkbox"/> | GOTERM_MF_ALL          | <a href="#">sugar binding</a>                                                                      | RT       |     | 17    | 6.3E-1  | 1.0E0     |
| <input type="checkbox"/> | INTERPRO               | <a href="#">Type II antifreeze protein</a>                                                         | RT       |     | 4     | 6.6E-1  | 1.0E0     |
| <input type="checkbox"/> | SP_PIR_KEYWORDS        | <a href="#">lectin</a>                                                                             | RT       |     | 13    | 7.0E-1  | 1.0E0     |
| <input type="checkbox"/> | UP_SEQ_FEATURE         | domain:C-type lectin                                                                               | RT       |     | 4     | 8.7E-1  | 1.0E0     |
| <input type="checkbox"/> | INTERPRO               | <a href="#">C-type lectin</a>                                                                      | RT       |     | 8     | 8.8E-1  | 1.0E0     |
| <input type="checkbox"/> | SMART                  | <a href="#">CLECT</a>                                                                              | RT       |     | 9     | 8.9E-1  | 1.0E0     |
|                          | Annotation Cluster 240 | Enrichment Score: 0.12                                                                             | <b>G</b> |     | Count | P_Value | Benjamini |
| <input type="checkbox"/> | GOTERM_MF_ALL          | <a href="#">hydrolase activity, acting on acid anhydrides, in phosphorus-containing anhydrides</a> | RT       |     | 45    | 7.1E-1  | 1.0E0     |
| <input type="checkbox"/> | GOTERM_MF_ALL          | <a href="#">hydrolase activity, acting on acid anhydrides</a>                                      | RT       |     | 45    | 7.3E-1  | 1.0E0     |
| <input type="checkbox"/> | GOTERM_MF_ALL          | <a href="#">pyrophosphatase activity</a>                                                           | RT       |     | 44    | 7.5E-1  | 1.0E0     |
| <input type="checkbox"/> | GOTERM_MF_ALL          | <a href="#">nucleoside-triphosphatase activity</a>                                                 | RT       |     | 42    | 7.5E-1  | 1.0E0     |
| <input type="checkbox"/> | GOTERM_MF_ALL          | <a href="#">ATPase activity</a>                                                                    | RT       |     | 24    | 8.3E-1  | 1.0E0     |
| <input type="checkbox"/> | GOTERM_MF_ALL          | <a href="#">ATPase activity, coupled</a>                                                           | RT       |     | 20    | 8.5E-1  | 1.0E0     |
|                          | Annotation Cluster 241 | Enrichment Score: 0.11                                                                             | <b>G</b> |     | Count | P_Value | Benjamini |
| <input type="checkbox"/> | GOTERM_BP_ALL          | <a href="#">response to bacterium</a>                                                              | RT       |     | 8     | 6.4E-1  | 1.0E0     |
| <input type="checkbox"/> | SP_PIR_KEYWORDS        | <a href="#">antimicrobial</a>                                                                      | RT       |     | 4     | 7.5E-1  | 1.0E0     |
| <input type="checkbox"/> | SP_PIR_KEYWORDS        | <a href="#">antibiotic</a>                                                                         | RT       |     | 3     | 8.2E-1  | 1.0E0     |
| <input type="checkbox"/> | GOTERM_BP_ALL          | <a href="#">defense response to bacterium</a>                                                      | RT       |     | 4     | 9.2E-1  | 1.0E0     |
|                          | Annotation Cluster 242 | Enrichment Score: 0.11                                                                             | <b>G</b> |     | Count | P_Value | Benjamini |
| <input type="checkbox"/> | INTERPRO               | <a href="#">Nucleotide-binding, alpha-beta plait</a>                                               | RT       |     | 14    | 6.1E-1  | 1.0E0     |
| <input type="checkbox"/> | INTERPRO               | <a href="#">RNA recognition motif, RNP-1</a>                                                       | RT       |     | 14    | 6.2E-1  | 1.0E0     |
| <input type="checkbox"/> | SMART                  | <a href="#">RRM</a>                                                                                | RT       |     | 16    | 7.8E-1  | 1.0E0     |

| <input type="checkbox"/> | SP_PIR_KEYWORDS        | <a href="#">rna-binding</a>                                           | <a href="#">RT</a> |  |  |  |  | 25    | 9.6E-1  | 1.0E0     |
|--------------------------|------------------------|-----------------------------------------------------------------------|--------------------|--|--|--|--|-------|---------|-----------|
| <input type="checkbox"/> | GOTERM_MF_ALL          | <a href="#">RNA binding</a>                                           | <a href="#">RT</a> |  |  |  |  | 34    | 1.0E0   | 1.0E0     |
|                          | Annotation Cluster 243 | Enrichment Score: 0.1                                                 | <b>G</b>           |  |  |  |  | Count | P_Value | Benjamini |
| <input type="checkbox"/> | KEGG_PATHWAY           | <a href="#">Long-term potentiation</a>                                | <a href="#">RT</a> |  |  |  |  | 6     | 7.3E-1  | 9.7E-1    |
| <input type="checkbox"/> | KEGG_PATHWAY           | <a href="#">Melanogenesis</a>                                         | <a href="#">RT</a> |  |  |  |  | 8     | 7.9E-1  | 9.8E-1    |
| <input type="checkbox"/> | KEGG_PATHWAY           | <a href="#">Wnt signaling pathway</a>                                 | <a href="#">RT</a> |  |  |  |  | 11    | 8.4E-1  | 9.9E-1    |
|                          | Annotation Cluster 244 | Enrichment Score: 0.1                                                 | <b>G</b>           |  |  |  |  | Count | P_Value | Benjamini |
| <input type="checkbox"/> | GOTERM_CC_ALL          | <a href="#">kinesin complex</a>                                       | <a href="#">RT</a> |  |  |  |  | 5     | 3.0E-1  | 1.0E0     |
| <input type="checkbox"/> | GOTERM_MF_ALL          | <a href="#">microtubule motor activity</a>                            | <a href="#">RT</a> |  |  |  |  | 6     | 7.5E-1  | 1.0E0     |
| <input type="checkbox"/> | INTERPRO               | <a href="#">Kinesin, motor region</a>                                 | <a href="#">RT</a> |  |  |  |  | 3     | 8.4E-1  | 1.0E0     |
| <input type="checkbox"/> | GOTERM_CC_ALL          | <a href="#">microtubule associated complex</a>                        | <a href="#">RT</a> |  |  |  |  | 7     | 8.7E-1  | 1.0E0     |
| <input type="checkbox"/> | SMART                  | <a href="#">KISc</a>                                                  | <a href="#">RT</a> |  |  |  |  | 3     | 8.8E-1  | 1.0E0     |
| <input type="checkbox"/> | GOTERM_BP_ALL          | <a href="#">cytoskeleton-dependent intracellular transport</a>        | <a href="#">RT</a> |  |  |  |  | 8     | 9.0E-1  | 1.0E0     |
| <input type="checkbox"/> | GOTERM_MF_ALL          | <a href="#">motor activity</a>                                        | <a href="#">RT</a> |  |  |  |  | 8     | 9.6E-1  | 1.0E0     |
| <input type="checkbox"/> | SP_PIR_KEYWORDS        | <a href="#">motor protein</a>                                         | <a href="#">RT</a> |  |  |  |  | 3     | 1.0E0   | 1.0E0     |
| <input type="checkbox"/> | GOTERM_BP_ALL          | <a href="#">microtubule-based movement</a>                            | <a href="#">RT</a> |  |  |  |  | 3     | 1.0E0   | 1.0E0     |
|                          | Annotation Cluster 245 | Enrichment Score: 0.1                                                 | <b>G</b>           |  |  |  |  | Count | P_Value | Benjamini |
| <input type="checkbox"/> | GOTERM_BP_ALL          | <a href="#">transition metal ion transport</a>                        | <a href="#">RT</a> |  |  |  |  | 6     | 5.7E-1  | 1.0E0     |
| <input type="checkbox"/> | GOTERM_BP_ALL          | <a href="#">di-, tri-valent inorganic cation transport</a>            | <a href="#">RT</a> |  |  |  |  | 10    | 8.9E-1  | 1.0E0     |
| <input type="checkbox"/> | GOTERM_BP_ALL          | <a href="#">metal ion transport</a>                                   | <a href="#">RT</a> |  |  |  |  | 18    | 1.0E0   | 1.0E0     |
|                          | Annotation Cluster 246 | Enrichment Score: 0.09                                                | <b>G</b>           |  |  |  |  | Count | P_Value | Benjamini |
| <input type="checkbox"/> | GOTERM_BP_ALL          | <a href="#">cell recognition</a>                                      | <a href="#">RT</a> |  |  |  |  | 5     | 6.0E-1  | 1.0E0     |
| <input type="checkbox"/> | GOTERM_BP_ALL          | <a href="#">single fertilization</a>                                  | <a href="#">RT</a> |  |  |  |  | 3     | 9.4E-1  | 1.0E0     |
| <input type="checkbox"/> | GOTERM_BP_ALL          | <a href="#">fertilization</a>                                         | <a href="#">RT</a> |  |  |  |  | 3     | 9.6E-1  | 1.0E0     |
|                          | Annotation Cluster 247 | Enrichment Score: 0.09                                                | <b>G</b>           |  |  |  |  | Count | P_Value | Benjamini |
| <input type="checkbox"/> | GOTERM_BP_ALL          | <a href="#">macromolecule biosynthetic process</a>                    | <a href="#">RT</a> |  |  |  |  | 59    | 6.4E-1  | 1.0E0     |
| <input type="checkbox"/> | GOTERM_BP_ALL          | <a href="#">biosynthetic process</a>                                  | <a href="#">RT</a> |  |  |  |  | 105   | 7.1E-1  | 1.0E0     |
| <input type="checkbox"/> | GOTERM_BP_ALL          | <a href="#">translation</a>                                           | <a href="#">RT</a> |  |  |  |  | 29    | 9.8E-1  | 1.0E0     |
| <input type="checkbox"/> | GOTERM_BP_ALL          | <a href="#">cellular biosynthetic process</a>                         | <a href="#">RT</a> |  |  |  |  | 65    | 9.8E-1  | 1.0E0     |
|                          | Annotation Cluster 248 | Enrichment Score: 0.09                                                | <b>G</b>           |  |  |  |  | Count | P_Value | Benjamini |
| <input type="checkbox"/> | GOTERM_CC_ALL          | <a href="#">vesicle membrane</a>                                      | <a href="#">RT</a> |  |  |  |  | 7     | 7.5E-1  | 1.0E0     |
| <input type="checkbox"/> | GOTERM_CC_ALL          | <a href="#">cytoplasmic vesicle part</a>                              | <a href="#">RT</a> |  |  |  |  | 6     | 7.8E-1  | 1.0E0     |
| <input type="checkbox"/> | GOTERM_CC_ALL          | <a href="#">cytoplasmic vesicle membrane</a>                          | <a href="#">RT</a> |  |  |  |  | 4     | 9.3E-1  | 1.0E0     |
|                          | Annotation Cluster 249 | Enrichment Score: 0.09                                                | <b>G</b>           |  |  |  |  | Count | P_Value | Benjamini |
| <input type="checkbox"/> | UP_SEQ_FEATURE         | disulfide bond                                                        | <a href="#">RT</a> |  |  |  |  | 139   | 5.1E-1  | 1.0E0     |
| <input type="checkbox"/> | UP_SEQ_FEATURE         | glycosylation site:N-linked (GlcNAc...)                               | <a href="#">RT</a> |  |  |  |  | 188   | 6.0E-1  | 1.0E0     |
| <input type="checkbox"/> | SP_PIR_KEYWORDS        | <a href="#">glycoprotein</a>                                          | <a href="#">RT</a> |  |  |  |  | 242   | 6.1E-1  | 1.0E0     |
| <input type="checkbox"/> | UP_SEQ_FEATURE         | topological domain:Cytoplasmic                                        | <a href="#">RT</a> |  |  |  |  | 138   | 8.8E-1  | 1.0E0     |
| <input type="checkbox"/> | UP_SEQ_FEATURE         | transmembrane region                                                  | <a href="#">RT</a> |  |  |  |  | 181   | 9.0E-1  | 1.0E0     |
| <input type="checkbox"/> | UP_SEQ_FEATURE         | signal peptide                                                        | <a href="#">RT</a> |  |  |  |  | 156   | 9.4E-1  | 1.0E0     |
| <input type="checkbox"/> | GOTERM_CC_ALL          | <a href="#">extracellular space</a>                                   | <a href="#">RT</a> |  |  |  |  | 154   | 9.7E-1  | 1.0E0     |
| <input type="checkbox"/> | GOTERM_CC_ALL          | <a href="#">extracellular region part</a>                             | <a href="#">RT</a> |  |  |  |  | 159   | 9.9E-1  | 1.0E0     |
| <input type="checkbox"/> | SP_PIR_KEYWORDS        | <a href="#">signal</a>                                                | <a href="#">RT</a> |  |  |  |  | 180   | 9.9E-1  | 1.0E0     |
| <input type="checkbox"/> | GOTERM_CC_ALL          | <a href="#">extracellular region</a>                                  | <a href="#">RT</a> |  |  |  |  | 163   | 1.0E0   | 1.0E0     |
|                          | Annotation Cluster 250 | Enrichment Score: 0.09                                                | <b>G</b>           |  |  |  |  | Count | P_Value | Benjamini |
| <input type="checkbox"/> | GOTERM_BP_ALL          | <a href="#">neural tube development</a>                               | <a href="#">RT</a> |  |  |  |  | 6     | 4.9E-1  | 1.0E0     |
| <input type="checkbox"/> | GOTERM_BP_ALL          | <a href="#">embryonic development ending in birth or egg hatching</a> | <a href="#">RT</a> |  |  |  |  | 14    | 9.6E-1  | 1.0E0     |
| <input type="checkbox"/> | GOTERM_BP_ALL          | <a href="#">chordate embryonic development</a>                        | <a href="#">RT</a> |  |  |  |  | 13    | 9.7E-1  | 1.0E0     |
| <input type="checkbox"/> | GOTERM_BP_ALL          | <a href="#">in utero embryonic development</a>                        | <a href="#">RT</a> |  |  |  |  | 5     | 1.0E0   | 1.0E0     |

| Annotation Cluster 251   |                 | Enrichment Score: 0.09                                          | G                  |    | Count | P_Value | Benjamini |
|--------------------------|-----------------|-----------------------------------------------------------------|--------------------|---------------------------------------------------------------------------------------|-------|---------|-----------|
| <input type="checkbox"/> | GOTERM_BP_ALL   | <a href="#">interphase of mitotic cell cycle</a>                | <a href="#">RT</a> |      | 6     | 5.8E-1  | 1.0E0     |
| <input type="checkbox"/> | GOTERM_BP_ALL   | <a href="#">interphase</a>                                      | <a href="#">RT</a> |      | 6     | 5.8E-1  | 1.0E0     |
| <input type="checkbox"/> | GOTERM_BP_ALL   | <a href="#">M phase of meiotic cell cycle</a>                   | <a href="#">RT</a> |      | 7     | 6.6E-1  | 1.0E0     |
| <input type="checkbox"/> | GOTERM_BP_ALL   | <a href="#">meiosis</a>                                         | <a href="#">RT</a> |      | 7     | 6.6E-1  | 1.0E0     |
| <input type="checkbox"/> | GOTERM_BP_ALL   | <a href="#">meiotic cell cycle</a>                              | <a href="#">RT</a> |      | 7     | 6.7E-1  | 1.0E0     |
| <input type="checkbox"/> | SP_PIR_KEYWORDS | <a href="#">Meiosis</a>                                         | <a href="#">RT</a> |      | 3     | 7.3E-1  | 1.0E0     |
| <input type="checkbox"/> | GOTERM_BP_ALL   | <a href="#">G1/S transition of mitotic cell cycle</a>           | <a href="#">RT</a> |      | 3     | 7.4E-1  | 1.0E0     |
| <input type="checkbox"/> | GOTERM_BP_ALL   | <a href="#">cell cycle phase</a>                                | <a href="#">RT</a> |      | 17    | 9.9E-1  | 1.0E0     |
| <input type="checkbox"/> | GOTERM_BP_ALL   | <a href="#">M phase</a>                                         | <a href="#">RT</a> |      | 13    | 9.9E-1  | 1.0E0     |
| <input type="checkbox"/> | GOTERM_BP_ALL   | <a href="#">mitotic cell cycle</a>                              | <a href="#">RT</a> |      | 12    | 1.0E0   | 1.0E0     |
| <input type="checkbox"/> | SP_PIR_KEYWORDS | <a href="#">cell division</a>                                   | <a href="#">RT</a> |      | 8     | 1.0E0   | 1.0E0     |
| <input type="checkbox"/> | GOTERM_BP_ALL   | <a href="#">cell division</a>                                   | <a href="#">RT</a> |      | 11    | 1.0E0   | 1.0E0     |
| <input type="checkbox"/> | SP_PIR_KEYWORDS | <a href="#">mitosis</a>                                         | <a href="#">RT</a> |      | 4     | 1.0E0   | 1.0E0     |
| <input type="checkbox"/> | GOTERM_BP_ALL   | <a href="#">mitosis</a>                                         | <a href="#">RT</a> |      | 7     | 1.0E0   | 1.0E0     |
| <input type="checkbox"/> | GOTERM_BP_ALL   | <a href="#">M phase of mitotic cell cycle</a>                   | <a href="#">RT</a> |      | 7     | 1.0E0   | 1.0E0     |
| Annotation Cluster 252   |                 | Enrichment Score: 0.09                                          | G                  |    | Count | P_Value | Benjamini |
| <input type="checkbox"/> | GOTERM_BP_ALL   | <a href="#">pyridine nucleotide metabolic process</a>           | <a href="#">RT</a> |      | 3     | 6.7E-1  | 1.0E0     |
| <input type="checkbox"/> | GOTERM_BP_ALL   | <a href="#">vitamin metabolic process</a>                       | <a href="#">RT</a> |      | 5     | 8.9E-1  | 1.0E0     |
| <input type="checkbox"/> | GOTERM_BP_ALL   | <a href="#">water-soluble vitamin metabolic process</a>         | <a href="#">RT</a> |      | 3     | 9.3E-1  | 1.0E0     |
| Annotation Cluster 253   |                 | Enrichment Score: 0.08                                          | G                  |    | Count | P_Value | Benjamini |
| <input type="checkbox"/> | GOTERM_BP_ALL   | <a href="#">hormone biosynthetic process</a>                    | <a href="#">RT</a> |      | 4     | 6.5E-1  | 1.0E0     |
| <input type="checkbox"/> | GOTERM_BP_ALL   | <a href="#">hormone metabolic process</a>                       | <a href="#">RT</a> |      | 6     | 8.9E-1  | 1.0E0     |
| <input type="checkbox"/> | GOTERM_BP_ALL   | <a href="#">steroid biosynthetic process</a>                    | <a href="#">RT</a> |      | 4     | 9.6E-1  | 1.0E0     |
| Annotation Cluster 254   |                 | Enrichment Score: 0.08                                          | G                  |   | Count | P_Value | Benjamini |
| <input type="checkbox"/> | GOTERM_CC_ALL   | <a href="#">vesicular fraction</a>                              | <a href="#">RT</a> |    | 13    | 7.4E-1  | 1.0E0     |
| <input type="checkbox"/> | GOTERM_CC_ALL   | <a href="#">microsome</a>                                       | <a href="#">RT</a> |    | 12    | 7.9E-1  | 1.0E0     |
| <input type="checkbox"/> | SP_PIR_KEYWORDS | <a href="#">microsome</a>                                       | <a href="#">RT</a> |    | 5     | 9.7E-1  | 1.0E0     |
| Annotation Cluster 255   |                 | Enrichment Score: 0.08                                          | G                  |  | Count | P_Value | Benjamini |
| <input type="checkbox"/> | UP_SEQ_FEATURE  | repeat:4                                                        | <a href="#">RT</a> |    | 6     | 7.6E-1  | 1.0E0     |
| <input type="checkbox"/> | UP_SEQ_FEATURE  | repeat:5                                                        | <a href="#">RT</a> |    | 5     | 7.8E-1  | 1.0E0     |
| <input type="checkbox"/> | UP_SEQ_FEATURE  | repeat:7                                                        | <a href="#">RT</a> |    | 4     | 7.8E-1  | 1.0E0     |
| <input type="checkbox"/> | UP_SEQ_FEATURE  | repeat:3                                                        | <a href="#">RT</a> |    | 7     | 7.9E-1  | 1.0E0     |
| <input type="checkbox"/> | UP_SEQ_FEATURE  | repeat:6                                                        | <a href="#">RT</a> |    | 4     | 8.4E-1  | 1.0E0     |
| <input type="checkbox"/> | UP_SEQ_FEATURE  | repeat:8                                                        | <a href="#">RT</a> |    | 3     | 8.6E-1  | 1.0E0     |
| <input type="checkbox"/> | UP_SEQ_FEATURE  | repeat:1                                                        | <a href="#">RT</a> |    | 7     | 9.2E-1  | 1.0E0     |
| <input type="checkbox"/> | UP_SEQ_FEATURE  | repeat:2                                                        | <a href="#">RT</a> |    | 7     | 9.3E-1  | 1.0E0     |
| Annotation Cluster 256   |                 | Enrichment Score: 0.08                                          | G                  |  | Count | P_Value | Benjamini |
| <input type="checkbox"/> | SP_PIR_KEYWORDS | <a href="#">viral nucleoprotein</a>                             | <a href="#">RT</a> |    | 4     | 5.8E-1  | 1.0E0     |
| <input type="checkbox"/> | SP_PIR_KEYWORDS | <a href="#">ribonucleoprotein</a>                               | <a href="#">RT</a> |    | 5     | 1.0E0   | 1.0E0     |
| <input type="checkbox"/> | GOTERM_CC_ALL   | <a href="#">ribonucleoprotein complex</a>                       | <a href="#">RT</a> |    | 10    | 1.0E0   | 1.0E0     |
| Annotation Cluster 257   |                 | Enrichment Score: 0.08                                          | G                  |  | Count | P_Value | Benjamini |
| <input type="checkbox"/> | UP_SEQ_FEATURE  | domain:EGF-like 1                                               | <a href="#">RT</a> |    | 8     | 3.8E-1  | 1.0E0     |
| <input type="checkbox"/> | UP_SEQ_FEATURE  | domain:EGF-like 2                                               | <a href="#">RT</a> |    | 6     | 4.5E-1  | 1.0E0     |
| <input type="checkbox"/> | UP_SEQ_FEATURE  | domain:EGF-like 3                                               | <a href="#">RT</a> |    | 4     | 7.6E-1  | 1.0E0     |
| <input type="checkbox"/> | INTERPRO        | <a href="#">Aspartic acid and asparagine hydroxylation site</a> | <a href="#">RT</a> |    | 5     | 9.4E-1  | 1.0E0     |
| <input type="checkbox"/> | INTERPRO        | <a href="#">EGF-like calcium-binding</a>                        | <a href="#">RT</a> |    | 5     | 9.5E-1  | 1.0E0     |
| <input type="checkbox"/> | INTERPRO        | <a href="#">EGF</a>                                             | <a href="#">RT</a> |    | 11    | 9.6E-1  | 1.0E0     |
| <input type="checkbox"/> | INTERPRO        | <a href="#">EGF-like</a>                                        | <a href="#">RT</a> |    | 7     | 9.6E-1  | 1.0E0     |
| <input type="checkbox"/> | INTERPRO        | <a href="#">EGF-like, type 3</a>                                | <a href="#">RT</a> |    | 10    | 9.7E-1  | 1.0E0     |

|                          |                 |                                                                                       |                    |  |       |         |           |
|--------------------------|-----------------|---------------------------------------------------------------------------------------|--------------------|--|-------|---------|-----------|
| <input type="checkbox"/> | INTERPRO        | <a href="#">EGF calcium-binding</a>                                                   | <a href="#">RT</a> |  | 3     | 9.7E-1  | 1.0E0     |
| <input type="checkbox"/> | INTERPRO        | <a href="#">EGF-like region</a>                                                       | <a href="#">RT</a> |  | 14    | 9.8E-1  | 1.0E0     |
| <input type="checkbox"/> | SMART           | <a href="#">EGF_CA</a>                                                                | <a href="#">RT</a> |  | 5     | 9.8E-1  | 1.0E0     |
| <input type="checkbox"/> | SP_PIR_KEYWORDS | <a href="#">egf-like domain</a>                                                       | <a href="#">RT</a> |  | 11    | 9.8E-1  | 1.0E0     |
| <input type="checkbox"/> | SMART           | <a href="#">EGF</a>                                                                   | <a href="#">RT</a> |  | 11    | 9.8E-1  | 1.0E0     |
| Annotation Cluster 258   |                 | Enrichment Score: 0.08                                                                | <b>G</b>           |  | Count | P_Value | Benjamini |
| <input type="checkbox"/> | GOTERM_MF_ALL   | <a href="#">inorganic anion transmembrane transporter activity</a>                    | <a href="#">RT</a> |  | 4     | 5.0E-1  | 1.0E0     |
| <input type="checkbox"/> | GOTERM_MF_ALL   | <a href="#">anion transmembrane transporter activity</a>                              | <a href="#">RT</a> |  | 6     | 9.7E-1  | 1.0E0     |
| <input type="checkbox"/> | GOTERM_BP_ALL   | <a href="#">anion transport</a>                                                       | <a href="#">RT</a> |  | 7     | 1.0E0   | 1.0E0     |
| <input type="checkbox"/> | GOTERM_BP_ALL   | <a href="#">inorganic anion transport</a>                                             | <a href="#">RT</a> |  | 5     | 1.0E0   | 1.0E0     |
| Annotation Cluster 259   |                 | Enrichment Score: 0.08                                                                | <b>G</b>           |  | Count | P_Value | Benjamini |
| <input type="checkbox"/> | GOTERM_BP_ALL   | <a href="#">nucleotide metabolic process</a>                                          | <a href="#">RT</a> |  | 21    | 3.3E-1  | 9.8E-1    |
| <input type="checkbox"/> | GOTERM_BP_ALL   | <a href="#">nucleobase, nucleoside and nucleotide metabolic process</a>               | <a href="#">RT</a> |  | 22    | 3.4E-1  | 9.8E-1    |
| <input type="checkbox"/> | GOTERM_BP_ALL   | <a href="#">nucleoside triphosphate metabolic process</a>                             | <a href="#">RT</a> |  | 7     | 6.1E-1  | 1.0E0     |
| <input type="checkbox"/> | GOTERM_BP_ALL   | <a href="#">purine ribonucleoside triphosphate metabolic process</a>                  | <a href="#">RT</a> |  | 5     | 7.9E-1  | 1.0E0     |
| <input type="checkbox"/> | GOTERM_BP_ALL   | <a href="#">purine nucleoside triphosphate metabolic process</a>                      | <a href="#">RT</a> |  | 5     | 8.1E-1  | 1.0E0     |
| <input type="checkbox"/> | GOTERM_BP_ALL   | <a href="#">ribonucleoside triphosphate metabolic process</a>                         | <a href="#">RT</a> |  | 5     | 8.1E-1  | 1.0E0     |
| <input type="checkbox"/> | GOTERM_BP_ALL   | <a href="#">purine ribonucleotide metabolic process</a>                               | <a href="#">RT</a> |  | 6     | 8.1E-1  | 1.0E0     |
| <input type="checkbox"/> | GOTERM_BP_ALL   | <a href="#">ATP metabolic process</a>                                                 | <a href="#">RT</a> |  | 4     | 8.4E-1  | 1.0E0     |
| <input type="checkbox"/> | GOTERM_BP_ALL   | <a href="#">purine ribonucleotide biosynthetic process</a>                            | <a href="#">RT</a> |  | 5     | 8.6E-1  | 1.0E0     |
| <input type="checkbox"/> | GOTERM_BP_ALL   | <a href="#">purine ribonucleoside triphosphate biosynthetic process</a>               | <a href="#">RT</a> |  | 4     | 8.8E-1  | 1.0E0     |
| <input type="checkbox"/> | GOTERM_BP_ALL   | <a href="#">purine nucleoside triphosphate biosynthetic process</a>                   | <a href="#">RT</a> |  | 4     | 8.8E-1  | 1.0E0     |
| <input type="checkbox"/> | GOTERM_BP_ALL   | <a href="#">ribonucleotide metabolic process</a>                                      | <a href="#">RT</a> |  | 6     | 8.9E-1  | 1.0E0     |
| <input type="checkbox"/> | GOTERM_BP_ALL   | <a href="#">ribonucleoside triphosphate biosynthetic process</a>                      | <a href="#">RT</a> |  | 4     | 8.9E-1  | 1.0E0     |
| <input type="checkbox"/> | GOTERM_BP_ALL   | <a href="#">purine nucleotide metabolic process</a>                                   | <a href="#">RT</a> |  | 6     | 9.0E-1  | 1.0E0     |
| <input type="checkbox"/> | GOTERM_BP_ALL   | <a href="#">ribonucleotide biosynthetic process</a>                                   | <a href="#">RT</a> |  | 5     | 9.1E-1  | 1.0E0     |
| <input type="checkbox"/> | GOTERM_BP_ALL   | <a href="#">nucleoside triphosphate biosynthetic process</a>                          | <a href="#">RT</a> |  | 4     | 9.1E-1  | 1.0E0     |
| <input type="checkbox"/> | GOTERM_MF_ALL   | <a href="#">hydrogen ion transporting ATP synthase activity, rotational mechanism</a> | <a href="#">RT</a> |  | 3     | 9.1E-1  | 1.0E0     |
| <input type="checkbox"/> | GOTERM_MF_ALL   | <a href="#">hydrogen ion transporting ATPase activity, rotational mechanism</a>       | <a href="#">RT</a> |  | 3     | 9.2E-1  | 1.0E0     |
| <input type="checkbox"/> | GOTERM_BP_ALL   | <a href="#">nucleoside phosphate metabolic process</a>                                | <a href="#">RT</a> |  | 3     | 9.2E-1  | 1.0E0     |
| <input type="checkbox"/> | GOTERM_BP_ALL   | <a href="#">ATP biosynthetic process</a>                                              | <a href="#">RT</a> |  | 3     | 9.2E-1  | 1.0E0     |
| <input type="checkbox"/> | GOTERM_BP_ALL   | <a href="#">purine nucleotide biosynthetic process</a>                                | <a href="#">RT</a> |  | 5     | 9.2E-1  | 1.0E0     |
| <input type="checkbox"/> | GOTERM_CC_ALL   | <a href="#">proton-transporting two-sector ATPase complex</a>                         | <a href="#">RT</a> |  | 3     | 9.3E-1  | 1.0E0     |
| <input type="checkbox"/> | GOTERM_BP_ALL   | <a href="#">nucleotide biosynthetic process</a>                                       | <a href="#">RT</a> |  | 9     | 9.3E-1  | 1.0E0     |
| <input type="checkbox"/> | GOTERM_MF_ALL   | <a href="#">hydrogen ion transmembrane transporter activity</a>                       | <a href="#">RT</a> |  | 6     | 9.6E-1  | 1.0E0     |
| <input type="checkbox"/> | GOTERM_MF_ALL   | <a href="#">cation-transporting ATPase activity</a>                                   | <a href="#">RT</a> |  | 3     | 9.6E-1  | 1.0E0     |
| <input type="checkbox"/> | GOTERM_MF_ALL   | <a href="#">monovalent inorganic cation transmembrane transporter activity</a>        | <a href="#">RT</a> |  | 6     | 9.7E-1  | 1.0E0     |
| <input type="checkbox"/> | GOTERM_MF_ALL   | <a href="#">ATPase activity, coupled to transmembrane movement of ions</a>            | <a href="#">RT</a> |  | 5     | 9.7E-1  | 1.0E0     |
| <input type="checkbox"/> | GOTERM_MF_ALL   | <a href="#">inorganic cation transmembrane transporter activity</a>                   | <a href="#">RT</a> |  | 8     | 9.7E-1  | 1.0E0     |
| <input type="checkbox"/> | KEGG_PATHWAY    | <a href="#">Oxidative phosphorylation</a>                                             | <a href="#">RT</a> |  | 6     | 9.8E-1  | 1.0E0     |
| <input type="checkbox"/> | GOTERM_BP_ALL   | <a href="#">proton transport</a>                                                      | <a href="#">RT</a> |  | 3     | 9.9E-1  | 1.0E0     |
| <input type="checkbox"/> | GOTERM_BP_ALL   | <a href="#">hydrogen transport</a>                                                    | <a href="#">RT</a> |  | 3     | 9.9E-1  | 1.0E0     |
| Annotation Cluster 260   |                 | Enrichment Score: 0.07                                                                | <b>G</b>           |  | Count | P_Value | Benjamini |
| <input type="checkbox"/> | GOTERM_BP_ALL   | <a href="#">immune response-activating cell surface</a>                               | <a href="#">RT</a> |  | 2     | 9.9E-1  | 1.0E0     |



| <input type="checkbox"/> |                        | <a href="#">receptor signaling pathway</a>                                         | <a href="#">RT</a> |  |  |  |  |       |         |           |
|--------------------------|------------------------|------------------------------------------------------------------------------------|--------------------|--|--|--|--|-------|---------|-----------|
| <input type="checkbox"/> | GOTERM_BP_ALL          | <a href="#">immune response-regulating cell surface receptor signaling pathway</a> | <a href="#">RT</a> |  |  |  |  | 3     | 8.3E-1  | 1.0E0     |
| <input type="checkbox"/> | GOTERM_BP_ALL          | <a href="#">immune response-activating signal transduction</a>                     | <a href="#">RT</a> |  |  |  |  | 3     | 8.4E-1  | 1.0E0     |
| <input type="checkbox"/> | GOTERM_BP_ALL          | <a href="#">immune response-regulating signal transduction</a>                     | <a href="#">RT</a> |  |  |  |  | 3     | 8.6E-1  | 1.0E0     |
| <input type="checkbox"/> | GOTERM_BP_ALL          | <a href="#">activation of immune response</a>                                      | <a href="#">RT</a> |  |  |  |  | 5     | 9.1E-1  | 1.0E0     |
|                          | Annotation Cluster 261 | Enrichment Score: 0.07                                                             | <b>G</b>           |  |  |  |  | Count | P_Value | Benjamini |
| <input type="checkbox"/> | GOTERM_MF_ALL          | <a href="#">damaged DNA binding</a>                                                | <a href="#">RT</a> |  |  |  |  | 3     | 5.7E-1  | 1.0E0     |
| <input type="checkbox"/> | GOTERM_BP_ALL          | <a href="#">response to endogenous stimulus</a>                                    | <a href="#">RT</a> |  |  |  |  | 21    | 8.7E-1  | 1.0E0     |
| <input type="checkbox"/> | SP_PIR_KEYWORDS        | <a href="#">DNA damage</a>                                                         | <a href="#">RT</a> |  |  |  |  | 9     | 9.2E-1  | 1.0E0     |
| <input type="checkbox"/> | SP_PIR_KEYWORDS        | <a href="#">DNA repair</a>                                                         | <a href="#">RT</a> |  |  |  |  | 8     | 9.3E-1  | 1.0E0     |
| <input type="checkbox"/> | GOTERM_BP_ALL          | <a href="#">response to DNA damage stimulus</a>                                    | <a href="#">RT</a> |  |  |  |  | 17    | 9.3E-1  | 1.0E0     |
| <input type="checkbox"/> | GOTERM_BP_ALL          | <a href="#">DNA repair</a>                                                         | <a href="#">RT</a> |  |  |  |  | 11    | 9.8E-1  | 1.0E0     |
|                          | Annotation Cluster 262 | Enrichment Score: 0.07                                                             | <b>G</b>           |  |  |  |  | Count | P_Value | Benjamini |
| <input type="checkbox"/> | INTERPRO               | <a href="#">Sulphotransferase</a>                                                  | <a href="#">RT</a> |  |  |  |  | 3     | 7.4E-1  | 1.0E0     |
| <input type="checkbox"/> | GOTERM_MF_ALL          | <a href="#">sulfotransferase activity</a>                                          | <a href="#">RT</a> |  |  |  |  | 3     | 8.9E-1  | 1.0E0     |
| <input type="checkbox"/> | GOTERM_MF_ALL          | <a href="#">transferase activity, transferring sulfur-containing groups</a>        | <a href="#">RT</a> |  |  |  |  | 3     | 9.5E-1  | 1.0E0     |
|                          | Annotation Cluster 263 | Enrichment Score: 0.06                                                             | <b>G</b>           |  |  |  |  | Count | P_Value | Benjamini |
| <input type="checkbox"/> | UP_SEQ_FEATURE         | glycosylation site:N-linked (GlcNAc...)                                            | <a href="#">RT</a> |  |  |  |  | 188   | 6.0E-1  | 1.0E0     |
| <input type="checkbox"/> | GOTERM_CC_ALL          | <a href="#">membrane part</a>                                                      | <a href="#">RT</a> |  |  |  |  | 386   | 7.8E-1  | 1.0E0     |
| <input type="checkbox"/> | UP_SEQ_FEATURE         | topological domain:Cytoplasmic                                                     | <a href="#">RT</a> |  |  |  |  | 138   | 8.8E-1  | 1.0E0     |
| <input type="checkbox"/> | GOTERM_CC_ALL          | <a href="#">integral to membrane</a>                                               | <a href="#">RT</a> |  |  |  |  | 334   | 9.0E-1  | 1.0E0     |
| <input type="checkbox"/> | UP_SEQ_FEATURE         | transmembrane region                                                               | <a href="#">RT</a> |  |  |  |  | 181   | 9.0E-1  | 1.0E0     |
| <input type="checkbox"/> | GOTERM_CC_ALL          | <a href="#">intrinsic to membrane</a>                                              | <a href="#">RT</a> |  |  |  |  | 335   | 9.1E-1  | 1.0E0     |
| <input type="checkbox"/> | GOTERM_CC_ALL          | <a href="#">membrane</a>                                                           | <a href="#">RT</a> |  |  |  |  | 478   | 9.1E-1  | 1.0E0     |
| <input type="checkbox"/> | SP_PIR_KEYWORDS        | <a href="#">membrane</a>                                                           | <a href="#">RT</a> |  |  |  |  | 336   | 9.2E-1  | 1.0E0     |
| <input type="checkbox"/> | SP_PIR_KEYWORDS        | <a href="#">transmembrane</a>                                                      | <a href="#">RT</a> |  |  |  |  | 260   | 9.4E-1  | 1.0E0     |
| <input type="checkbox"/> | UP_SEQ_FEATURE         | topological domain:Extracellular                                                   | <a href="#">RT</a> |  |  |  |  | 100   | 9.5E-1  | 1.0E0     |
|                          | Annotation Cluster 264 | Enrichment Score: 0.06                                                             | <b>G</b>           |  |  |  |  | Count | P_Value | Benjamini |
| <input type="checkbox"/> | GOTERM_BP_ALL          | <a href="#">cell adhesion</a>                                                      | <a href="#">RT</a> |  |  |  |  | 53    | 8.2E-1  | 1.0E0     |
| <input type="checkbox"/> | GOTERM_BP_ALL          | <a href="#">biological adhesion</a>                                                | <a href="#">RT</a> |  |  |  |  | 53    | 8.2E-1  | 1.0E0     |
| <input type="checkbox"/> | SP_PIR_KEYWORDS        | <a href="#">cell adhesion</a>                                                      | <a href="#">RT</a> |  |  |  |  | 21    | 9.8E-1  | 1.0E0     |
|                          | Annotation Cluster 265 | Enrichment Score: 0.05                                                             | <b>G</b>           |  |  |  |  | Count | P_Value | Benjamini |
| <input type="checkbox"/> | GOTERM_BP_ALL          | <a href="#">embryonic limb morphogenesis</a>                                       | <a href="#">RT</a> |  |  |  |  | 5     | 8.5E-1  | 1.0E0     |
| <input type="checkbox"/> | GOTERM_BP_ALL          | <a href="#">embryonic appendage morphogenesis</a>                                  | <a href="#">RT</a> |  |  |  |  | 5     | 8.5E-1  | 1.0E0     |
| <input type="checkbox"/> | GOTERM_BP_ALL          | <a href="#">appendage morphogenesis</a>                                            | <a href="#">RT</a> |  |  |  |  | 5     | 8.8E-1  | 1.0E0     |
| <input type="checkbox"/> | GOTERM_BP_ALL          | <a href="#">limb morphogenesis</a>                                                 | <a href="#">RT</a> |  |  |  |  | 5     | 8.8E-1  | 1.0E0     |
| <input type="checkbox"/> | GOTERM_BP_ALL          | <a href="#">appendage development</a>                                              | <a href="#">RT</a> |  |  |  |  | 5     | 9.0E-1  | 1.0E0     |
| <input type="checkbox"/> | GOTERM_BP_ALL          | <a href="#">limb development</a>                                                   | <a href="#">RT</a> |  |  |  |  | 5     | 9.0E-1  | 1.0E0     |
| <input type="checkbox"/> | GOTERM_BP_ALL          | <a href="#">embryonic morphogenesis</a>                                            | <a href="#">RT</a> |  |  |  |  | 13    | 9.1E-1  | 1.0E0     |
|                          | Annotation Cluster 266 | Enrichment Score: 0.05                                                             | <b>G</b>           |  |  |  |  | Count | P_Value | Benjamini |
| <input type="checkbox"/> | GOTERM_BP_ALL          | <a href="#">protein localization</a>                                               | <a href="#">RT</a> |  |  |  |  | 64    | 7.7E-1  | 1.0E0     |
| <input type="checkbox"/> | GOTERM_BP_ALL          | <a href="#">protein transport</a>                                                  | <a href="#">RT</a> |  |  |  |  | 55    | 7.9E-1  | 1.0E0     |
| <input type="checkbox"/> | GOTERM_BP_ALL          | <a href="#">establishment of protein localization</a>                              | <a href="#">RT</a> |  |  |  |  | 57    | 8.4E-1  | 1.0E0     |
| <input type="checkbox"/> | GOTERM_BP_ALL          | <a href="#">macromolecule localization</a>                                         | <a href="#">RT</a> |  |  |  |  | 64    | 8.6E-1  | 1.0E0     |
| <input type="checkbox"/> | GOTERM_BP_ALL          | <a href="#">intracellular protein transport</a>                                    | <a href="#">RT</a> |  |  |  |  | 32    | 9.0E-1  | 1.0E0     |
| <input type="checkbox"/> | GOTERM_BP_ALL          | <a href="#">intracellular transport</a>                                            | <a href="#">RT</a> |  |  |  |  | 51    | 9.1E-1  | 1.0E0     |
| <input type="checkbox"/> | GOTERM_BP_ALL          | <a href="#">establishment of cellular localization</a>                             | <a href="#">RT</a> |  |  |  |  | 60    | 9.8E-1  | 1.0E0     |
| <input type="checkbox"/> | GOTERM_BP_ALL          | <a href="#">cellular localization</a>                                              | <a href="#">RT</a> |  |  |  |  | 60    | 9.9E-1  | 1.0E0     |
| <input type="checkbox"/> | SP_PIR_KEYWORDS        | <a href="#">protein transport</a>                                                  | <a href="#">RT</a> |  |  |  |  | 22    | 9.9E-1  | 1.0E0     |

| Annotation Cluster 267   |                 | Enrichment Score: 0.05                                         |    | G                                                                                   |    | Count | P_Value | Benjamini |
|--------------------------|-----------------|----------------------------------------------------------------|----|-------------------------------------------------------------------------------------|---------------------------------------------------------------------------------------|-------|---------|-----------|
| <input type="checkbox"/> | INTERPRO        | <a href="#">High mobility group box, HMG1/HMG2</a>             | RT |    |                                                                                       | 4     | 8.4E-1  | 1.0E0     |
| <input type="checkbox"/> | SMART           | <a href="#">HMG</a>                                            | RT |    |                                                                                       | 4     | 9.1E-1  | 1.0E0     |
| <input type="checkbox"/> | INTERPRO        | <a href="#">High mobility group box, HMG</a>                   | RT |    |                                                                                       | 3     | 9.3E-1  | 1.0E0     |
| Annotation Cluster 268   |                 | Enrichment Score: 0.05                                         |    | G                                                                                   |    | Count | P_Value | Benjamini |
| <input type="checkbox"/> | SP_PIR_KEYWORDS | <a href="#">microtubule</a>                                    | RT |    |                                                                                       | 11    | 8.1E-1  | 1.0E0     |
| <input type="checkbox"/> | GOTERM_BP_ALL   | <a href="#">microtubule-based process</a>                      | RT |    |                                                                                       | 14    | 8.8E-1  | 1.0E0     |
| <input type="checkbox"/> | GOTERM_CC_ALL   | <a href="#">microtubule</a>                                    | RT |    |                                                                                       | 13    | 9.0E-1  | 1.0E0     |
| <input type="checkbox"/> | GOTERM_CC_ALL   | <a href="#">microtubule cytoskeleton</a>                       | RT |    |                                                                                       | 22    | 9.0E-1  | 1.0E0     |
| <input type="checkbox"/> | GOTERM_CC_ALL   | <a href="#">cytoskeletal part</a>                              | RT |    |                                                                                       | 28    | 1.0E0   | 1.0E0     |
| Annotation Cluster 269   |                 | Enrichment Score: 0.05                                         |    | G                                                                                   |    | Count | P_Value | Benjamini |
| <input type="checkbox"/> | GOTERM_BP_ALL   | <a href="#">Golgi vesicle transport</a>                        | RT |    |                                                                                       | 7     | 7.7E-1  | 1.0E0     |
| <input type="checkbox"/> | GOTERM_BP_ALL   | <a href="#">ER to Golgi vesicle-mediated transport</a>         | RT |    |                                                                                       | 3     | 9.7E-1  | 1.0E0     |
| <input type="checkbox"/> | SP_PIR_KEYWORDS | <a href="#">er-golgi transport</a>                             | RT |    |                                                                                       | 3     | 9.7E-1  | 1.0E0     |
| Annotation Cluster 270   |                 | Enrichment Score: 0.04                                         |    | G                                                                                   |    | Count | P_Value | Benjamini |
| <input type="checkbox"/> | GOTERM_CC_ALL   | <a href="#">extracellular matrix</a>                           | RT |    |                                                                                       | 21    | 8.8E-1  | 1.0E0     |
| <input type="checkbox"/> | GOTERM_CC_ALL   | <a href="#">proteinaceous extracellular matrix</a>             | RT |    |                                                                                       | 20    | 9.0E-1  | 1.0E0     |
| <input type="checkbox"/> | SP_PIR_KEYWORDS | <a href="#">extracellular matrix</a>                           | RT |    |                                                                                       | 13    | 9.3E-1  | 1.0E0     |
| Annotation Cluster 271   |                 | Enrichment Score: 0.04                                         |    | G                                                                                   |    | Count | P_Value | Benjamini |
| <input type="checkbox"/> | SP_PIR_KEYWORDS | <a href="#">oxidoreductase</a>                                 | RT |    |                                                                                       | 39    | 8.6E-1  | 1.0E0     |
| <input type="checkbox"/> | GOTERM_BP_ALL   | <a href="#">electron transport</a>                             | RT |    |                                                                                       | 30    | 8.8E-1  | 1.0E0     |
| <input type="checkbox"/> | GOTERM_MF_ALL   | <a href="#">oxidoreductase activity</a>                        | RT |    |                                                                                       | 65    | 9.0E-1  | 1.0E0     |
| <input type="checkbox"/> | GOTERM_BP_ALL   | <a href="#">generation of precursor metabolites and energy</a> | RT |    |                                                                                       | 32    | 9.9E-1  | 1.0E0     |
| Annotation Cluster 272   |                 | Enrichment Score: 0.04                                         |    | G                                                                                   |    | Count | P_Value | Benjamini |
| <input type="checkbox"/> | GOTERM_BP_ALL   | <a href="#">eye morphogenesis</a>                              | RT |   |                                                                                       | 4     | 7.9E-1  | 1.0E0     |
| <input type="checkbox"/> | GOTERM_BP_ALL   | <a href="#">eye development</a>                                | RT |  |                                                                                       | 6     | 9.5E-1  | 1.0E0     |
| <input type="checkbox"/> | GOTERM_BP_ALL   | <a href="#">sensory organ development</a>                      | RT |  |                                                                                       | 10    | 9.8E-1  | 1.0E0     |
| Annotation Cluster 273   |                 | Enrichment Score: 0.04                                         |    | G                                                                                   |  | Count | P_Value | Benjamini |
| <input type="checkbox"/> | GOTERM_BP_ALL   | <a href="#">Golgi vesicle transport</a>                        | RT |  |                                                                                       | 7     | 7.7E-1  | 1.0E0     |
| <input type="checkbox"/> | GOTERM_BP_ALL   | <a href="#">secretory pathway</a>                              | RT |  |                                                                                       | 14    | 9.7E-1  | 1.0E0     |
| <input type="checkbox"/> | GOTERM_BP_ALL   | <a href="#">secretion by cell</a>                              | RT |  |                                                                                       | 17    | 9.7E-1  | 1.0E0     |
| <input type="checkbox"/> | GOTERM_BP_ALL   | <a href="#">secretion</a>                                      | RT |  |                                                                                       | 20    | 9.8E-1  | 1.0E0     |
| Annotation Cluster 274   |                 | Enrichment Score: 0.04                                         |    | G                                                                                   |  | Count | P_Value | Benjamini |
| <input type="checkbox"/> | INTERPRO        | <a href="#">Fibronectin, type III-like fold</a>                | RT |  |                                                                                       | 13    | 8.0E-1  | 1.0E0     |
| <input type="checkbox"/> | UP_SEQ_FEATURE  | domain:Fibronectin type-III 3                                  | RT |  |                                                                                       | 3     | 8.9E-1  | 1.0E0     |
| <input type="checkbox"/> | UP_SEQ_FEATURE  | domain:Fibronectin type-III 1                                  | RT |  |                                                                                       | 4     | 9.6E-1  | 1.0E0     |
| <input type="checkbox"/> | UP_SEQ_FEATURE  | domain:Fibronectin type-III 2                                  | RT |  |                                                                                       | 4     | 9.6E-1  | 1.0E0     |
| <input type="checkbox"/> | INTERPRO        | <a href="#">Fibronectin, type III</a>                          | RT |  |                                                                                       | 10    | 9.6E-1  | 1.0E0     |
| <input type="checkbox"/> | SMART           | <a href="#">FN3</a>                                            | RT |  |                                                                                       | 11    | 9.8E-1  | 1.0E0     |
| Annotation Cluster 275   |                 | Enrichment Score: 0.04                                         |    | G                                                                                   |  | Count | P_Value | Benjamini |
| <input type="checkbox"/> | SP_PIR_KEYWORDS | <a href="#">lipid degradation</a>                              | RT |  |                                                                                       | 5     | 7.9E-1  | 1.0E0     |
| <input type="checkbox"/> | GOTERM_MF_ALL   | <a href="#">phospholipase activity</a>                         | RT |  |                                                                                       | 3     | 9.5E-1  | 1.0E0     |
| <input type="checkbox"/> | GOTERM_MF_ALL   | <a href="#">lipase activity</a>                                | RT |  |                                                                                       | 4     | 9.6E-1  | 1.0E0     |
| <input type="checkbox"/> | GOTERM_BP_ALL   | <a href="#">lipid catabolic process</a>                        | RT |  |                                                                                       | 6     | 9.6E-1  | 1.0E0     |
| <input type="checkbox"/> | GOTERM_MF_ALL   | <a href="#">carboxylesterase activity</a>                      | RT |  |                                                                                       | 6     | 9.6E-1  | 1.0E0     |
| Annotation Cluster 276   |                 | Enrichment Score: 0.03                                         |    | G                                                                                   |  | Count | P_Value | Benjamini |
| <input type="checkbox"/> | UP_SEQ_FEATURE  | site:Reactive bond                                             | RT |  |                                                                                       | 3     | 7.7E-1  | 1.0E0     |
| <input type="checkbox"/> | PIR_SUPERFAMILY | PIRSF001630:serpin                                             | RT |  |                                                                                       | 3     | 8.9E-1  | 1.0E0     |
| <input type="checkbox"/> | INTERPRO        | <a href="#">Protease inhibitor I4, serpin</a>                  | RT |  |                                                                                       | 3     | 9.5E-1  | 1.0E0     |
| <input type="checkbox"/> | SP_PIR_KEYWORDS | <a href="#">protease inhibitor</a>                             | RT |  |                                                                                       | 4     | 9.7E-1  | 1.0E0     |

|                          |                        |                                                                                                                       |                    |  |       |         |           |  |
|--------------------------|------------------------|-----------------------------------------------------------------------------------------------------------------------|--------------------|--|-------|---------|-----------|--|
| <input type="checkbox"/> | SMART                  | <a href="#">SERPIN</a>                                                                                                | <a href="#">RT</a> |  | 3     | 9.7E-1  | 1.0E0     |  |
| <input type="checkbox"/> | SP_PIR_KEYWORDS        | <a href="#">Serine protease inhibitor</a>                                                                             | <a href="#">RT</a> |  | 3     | 9.7E-1  | 1.0E0     |  |
| <input type="checkbox"/> | GOTERM_MF_ALL          | <a href="#">serine-type endopeptidase inhibitor activity</a>                                                          | <a href="#">RT</a> |  | 5     | 9.8E-1  | 1.0E0     |  |
|                          | Annotation Cluster 277 | Enrichment Score: 0.03                                                                                                | <b>G</b>           |  | Count | P_Value | Benjamini |  |
| <input type="checkbox"/> | GOTERM_MF_ALL          | <a href="#">endopeptidase inhibitor activity</a>                                                                      | <a href="#">RT</a> |  | 10    | 8.8E-1  | 1.0E0     |  |
| <input type="checkbox"/> | GOTERM_MF_ALL          | <a href="#">protease inhibitor activity</a>                                                                           | <a href="#">RT</a> |  | 10    | 9.0E-1  | 1.0E0     |  |
| <input type="checkbox"/> | GOTERM_MF_ALL          | <a href="#">enzyme inhibitor activity</a>                                                                             | <a href="#">RT</a> |  | 15    | 9.1E-1  | 1.0E0     |  |
| <input type="checkbox"/> | SP_PIR_KEYWORDS        | <a href="#">protease inhibitor</a>                                                                                    | <a href="#">RT</a> |  | 4     | 9.7E-1  | 1.0E0     |  |
| <input type="checkbox"/> | GOTERM_MF_ALL          | <a href="#">serine-type endopeptidase inhibitor activity</a>                                                          | <a href="#">RT</a> |  | 5     | 9.8E-1  | 1.0E0     |  |
|                          | Annotation Cluster 278 | Enrichment Score: 0.03                                                                                                | <b>G</b>           |  | Count | P_Value | Benjamini |  |
| <input type="checkbox"/> | GOTERM_BP_ALL          | <a href="#">regulation of anatomical structure morphogenesis</a>                                                      | <a href="#">RT</a> |  | 3     | 9.4E-1  | 1.0E0     |  |
| <input type="checkbox"/> | GOTERM_BP_ALL          | <a href="#">regulation of cell shape</a>                                                                              | <a href="#">RT</a> |  | 3     | 9.4E-1  | 1.0E0     |  |
| <input type="checkbox"/> | GOTERM_BP_ALL          | <a href="#">regulation of cell morphogenesis</a>                                                                      | <a href="#">RT</a> |  | 3     | 9.4E-1  | 1.0E0     |  |
|                          | Annotation Cluster 279 | Enrichment Score: 0.02                                                                                                | <b>G</b>           |  | Count | P_Value | Benjamini |  |
| <input type="checkbox"/> | UP_SEQ_FEATURE         | zinc finger region:C2H2-type 1                                                                                        | <a href="#">RT</a> |  | 9     | 8.9E-1  | 1.0E0     |  |
| <input type="checkbox"/> | UP_SEQ_FEATURE         | zinc finger region:C2H2-type 2                                                                                        | <a href="#">RT</a> |  | 8     | 9.4E-1  | 1.0E0     |  |
| <input type="checkbox"/> | UP_SEQ_FEATURE         | zinc finger region:C2H2-type 4                                                                                        | <a href="#">RT</a> |  | 5     | 9.8E-1  | 1.0E0     |  |
| <input type="checkbox"/> | UP_SEQ_FEATURE         | zinc finger region:C2H2-type 3                                                                                        | <a href="#">RT</a> |  | 6     | 9.9E-1  | 1.0E0     |  |
|                          | Annotation Cluster 280 | Enrichment Score: 0.02                                                                                                | <b>G</b>           |  | Count | P_Value | Benjamini |  |
| <input type="checkbox"/> | GOTERM_BP_ALL          | <a href="#">inner ear development</a>                                                                                 | <a href="#">RT</a> |  | 4     | 9.4E-1  | 1.0E0     |  |
| <input type="checkbox"/> | GOTERM_BP_ALL          | <a href="#">inner ear morphogenesis</a>                                                                               | <a href="#">RT</a> |  | 3     | 9.4E-1  | 1.0E0     |  |
| <input type="checkbox"/> | GOTERM_BP_ALL          | <a href="#">ear development</a>                                                                                       | <a href="#">RT</a> |  | 4     | 9.6E-1  | 1.0E0     |  |
| <input type="checkbox"/> | GOTERM_BP_ALL          | <a href="#">ear morphogenesis</a>                                                                                     | <a href="#">RT</a> |  | 3     | 9.6E-1  | 1.0E0     |  |
|                          | Annotation Cluster 281 | Enrichment Score: 0.02                                                                                                | <b>G</b>           |  | Count | P_Value | Benjamini |  |
| <input type="checkbox"/> | GOTERM_CC_ALL          | <a href="#">synapse part</a>                                                                                          | <a href="#">RT</a> |  | 8     | 8.9E-1  | 1.0E0     |  |
| <input type="checkbox"/> | GOTERM_CC_ALL          | <a href="#">postsynaptic membrane</a>                                                                                 | <a href="#">RT</a> |  | 5     | 9.8E-1  | 1.0E0     |  |
| <input type="checkbox"/> | SP_PIR_KEYWORDS        | <a href="#">Postsynaptic cell membrane</a>                                                                            | <a href="#">RT</a> |  | 4     | 9.9E-1  | 1.0E0     |  |
|                          | Annotation Cluster 282 | Enrichment Score: 0.02                                                                                                | <b>G</b>           |  | Count | P_Value | Benjamini |  |
| <input type="checkbox"/> | GOTERM_CC_ALL          | <a href="#">intrinsic to endoplasmic reticulum membrane</a>                                                           | <a href="#">RT</a> |  | 3     | 8.5E-1  | 1.0E0     |  |
| <input type="checkbox"/> | GOTERM_CC_ALL          | <a href="#">endoplasmic reticulum part</a>                                                                            | <a href="#">RT</a> |  | 6     | 9.7E-1  | 1.0E0     |  |
| <input type="checkbox"/> | GOTERM_CC_ALL          | <a href="#">endoplasmic reticulum membrane</a>                                                                        | <a href="#">RT</a> |  | 5     | 9.8E-1  | 1.0E0     |  |
| <input type="checkbox"/> | GOTERM_CC_ALL          | <a href="#">nuclear envelope-endoplasmic reticulum network</a>                                                        | <a href="#">RT</a> |  | 5     | 9.8E-1  | 1.0E0     |  |
| <input type="checkbox"/> | GOTERM_MF_ALL          | <a href="#">oxidoreductase activity, acting on paired donors, with incorporation or reduction of molecular oxygen</a> | <a href="#">RT</a> |  | 6     | 9.9E-1  | 1.0E0     |  |
|                          | Annotation Cluster 283 | Enrichment Score: 0.02                                                                                                | <b>G</b>           |  | Count | P_Value | Benjamini |  |
| <input type="checkbox"/> | GOTERM_MF_ALL          | <a href="#">neuropeptide Y receptor activity</a>                                                                      | <a href="#">RT</a> |  | 3     | 8.9E-1  | 1.0E0     |  |
| <input type="checkbox"/> | GOTERM_MF_ALL          | <a href="#">neuropeptide binding</a>                                                                                  | <a href="#">RT</a> |  | 3     | 9.5E-1  | 1.0E0     |  |
| <input type="checkbox"/> | GOTERM_MF_ALL          | <a href="#">neuropeptide receptor activity</a>                                                                        | <a href="#">RT</a> |  | 3     | 9.5E-1  | 1.0E0     |  |
| <input type="checkbox"/> | GOTERM_MF_ALL          | <a href="#">neurotransmitter receptor activity</a>                                                                    | <a href="#">RT</a> |  | 3     | 1.0E0   | 1.0E0     |  |
| <input type="checkbox"/> | GOTERM_MF_ALL          | <a href="#">neurotransmitter binding</a>                                                                              | <a href="#">RT</a> |  | 3     | 1.0E0   | 1.0E0     |  |
|                          | Annotation Cluster 284 | Enrichment Score: 0.02                                                                                                | <b>G</b>           |  | Count | P_Value | Benjamini |  |
| <input type="checkbox"/> | GOTERM_CC_ALL          | <a href="#">transcription factor complex</a>                                                                          | <a href="#">RT</a> |  | 33    | 8.5E-1  | 1.0E0     |  |
| <input type="checkbox"/> | GOTERM_CC_ALL          | <a href="#">nucleoplasm</a>                                                                                           | <a href="#">RT</a> |  | 42    | 9.6E-1  | 1.0E0     |  |
| <input type="checkbox"/> | GOTERM_CC_ALL          | <a href="#">nucleoplasm part</a>                                                                                      | <a href="#">RT</a> |  | 39    | 9.6E-1  | 1.0E0     |  |
| <input type="checkbox"/> | GOTERM_CC_ALL          | <a href="#">nuclear lumen</a>                                                                                         | <a href="#">RT</a> |  | 46    | 1.0E0   | 1.0E0     |  |
| <input type="checkbox"/> | GOTERM_CC_ALL          | <a href="#">organelle lumen</a>                                                                                       | <a href="#">RT</a> |  | 50    | 1.0E0   | 1.0E0     |  |
| <input type="checkbox"/> | GOTERM_CC_ALL          | <a href="#">membrane-enclosed lumen</a>                                                                               | <a href="#">RT</a> |  | 50    | 1.0E0   | 1.0E0     |  |
| <input type="checkbox"/> | GOTERM_CC_ALL          | <a href="#">nuclear part</a>                                                                                          | <a href="#">RT</a> |  | 61    | 1.0E0   | 1.0E0     |  |
|                          | Annotation Cluster 285 | Enrichment Score: 0.01                                                                                                | <b>G</b>           |  | Count | P_Value | Benjamini |  |

| <input type="checkbox"/> |                        |                                                                                                      |                    |  |  |  |       |         |           |
|--------------------------|------------------------|------------------------------------------------------------------------------------------------------|--------------------|--|--|--|-------|---------|-----------|
| <input type="checkbox"/> | UP_SEQ_FEATURE         | transit peptide:Mitochondrion                                                                        | <a href="#">RT</a> |  |  |  | 17    | 9.6E-1  | 1.0E0     |
| <input type="checkbox"/> | SP_PIR_KEYWORDS        | <a href="#">transit peptide</a>                                                                      | <a href="#">RT</a> |  |  |  | 24    | 9.6E-1  | 1.0E0     |
| <input type="checkbox"/> | GOTERM_CC_ALL          | <a href="#">mitochondrion</a>                                                                        | <a href="#">RT</a> |  |  |  | 64    | 9.6E-1  | 1.0E0     |
| <input type="checkbox"/> | SP_PIR_KEYWORDS        | <a href="#">Mitochondrion</a>                                                                        | <a href="#">RT</a> |  |  |  | 39    | 9.9E-1  | 1.0E0     |
|                          | Annotation Cluster 286 | Enrichment Score: 0.01                                                                               | <b>G</b>           |  |  |  | Count | P_Value | Benjamini |
| <input type="checkbox"/> | GOTERM_BP_ALL          | <a href="#">nuclear mRNA splicing, via spliceosome</a>                                               | <a href="#">RT</a> |  |  |  | 3     | 9.6E-1  | 1.0E0     |
| <input type="checkbox"/> | GOTERM_BP_ALL          | <a href="#">RNA splicing, via transesterification reactions with bulged adenosine as nucleophile</a> | <a href="#">RT</a> |  |  |  | 3     | 9.6E-1  | 1.0E0     |
| <input type="checkbox"/> | GOTERM_BP_ALL          | <a href="#">RNA splicing, via transesterification reactions</a>                                      | <a href="#">RT</a> |  |  |  | 3     | 9.6E-1  | 1.0E0     |
| <input type="checkbox"/> | GOTERM_BP_ALL          | <a href="#">RNA splicing</a>                                                                         | <a href="#">RT</a> |  |  |  | 6     | 1.0E0   | 1.0E0     |
|                          | Annotation Cluster 287 | Enrichment Score: 0.01                                                                               | <b>G</b>           |  |  |  | Count | P_Value | Benjamini |
| <input type="checkbox"/> | GOTERM_BP_ALL          | <a href="#">tRNA aminoacylation</a>                                                                  | <a href="#">RT</a> |  |  |  | 3     | 9.6E-1  | 1.0E0     |
| <input type="checkbox"/> | GOTERM_BP_ALL          | <a href="#">amino acid activation</a>                                                                | <a href="#">RT</a> |  |  |  | 3     | 9.6E-1  | 1.0E0     |
| <input type="checkbox"/> | GOTERM_BP_ALL          | <a href="#">tRNA aminoacylation for protein translation</a>                                          | <a href="#">RT</a> |  |  |  | 3     | 9.6E-1  | 1.0E0     |
| <input type="checkbox"/> | GOTERM_MF_ALL          | <a href="#">ligase activity, forming aminoacyl-tRNA and related compounds</a>                        | <a href="#">RT</a> |  |  |  | 3     | 9.7E-1  | 1.0E0     |
| <input type="checkbox"/> | GOTERM_MF_ALL          | <a href="#">aminoacyl-tRNA ligase activity</a>                                                       | <a href="#">RT</a> |  |  |  | 3     | 9.7E-1  | 1.0E0     |
| <input type="checkbox"/> | GOTERM_MF_ALL          | <a href="#">ligase activity, forming carbon-oxygen bonds</a>                                         | <a href="#">RT</a> |  |  |  | 3     | 9.7E-1  | 1.0E0     |
| <input type="checkbox"/> | GOTERM_BP_ALL          | <a href="#">tRNA metabolic process</a>                                                               | <a href="#">RT</a> |  |  |  | 4     | 1.0E0   | 1.0E0     |
|                          | Annotation Cluster 288 | Enrichment Score: 0.01                                                                               | <b>G</b>           |  |  |  | Count | P_Value | Benjamini |
| <input type="checkbox"/> | INTERPRO               | <a href="#">Zinc finger, LIM-type</a>                                                                | <a href="#">RT</a> |  |  |  | 3     | 9.7E-1  | 1.0E0     |
| <input type="checkbox"/> | SP_PIR_KEYWORDS        | <a href="#">lim domain</a>                                                                           | <a href="#">RT</a> |  |  |  | 3     | 9.8E-1  | 1.0E0     |
| <input type="checkbox"/> | SMART                  | <a href="#">LIM</a>                                                                                  | <a href="#">RT</a> |  |  |  | 3     | 9.9E-1  | 1.0E0     |
|                          | Annotation Cluster 289 | Enrichment Score: 0.01                                                                               | <b>G</b>           |  |  |  | Count | P_Value | Benjamini |
| <input type="checkbox"/> | GOTERM_CC_ALL          | <a href="#">organelle membrane</a>                                                                   | <a href="#">RT</a> |  |  |  | 45    | 9.3E-1  | 1.0E0     |
| <input type="checkbox"/> | GOTERM_CC_ALL          | <a href="#">mitochondrial envelope</a>                                                               | <a href="#">RT</a> |  |  |  | 18    | 9.7E-1  | 1.0E0     |
| <input type="checkbox"/> | GOTERM_CC_ALL          | <a href="#">mitochondrial membrane</a>                                                               | <a href="#">RT</a> |  |  |  | 16    | 9.8E-1  | 1.0E0     |
| <input type="checkbox"/> | GOTERM_CC_ALL          | <a href="#">mitochondrial part</a>                                                                   | <a href="#">RT</a> |  |  |  | 20    | 9.9E-1  | 1.0E0     |
| <input type="checkbox"/> | GOTERM_CC_ALL          | <a href="#">mitochondrial inner membrane</a>                                                         | <a href="#">RT</a> |  |  |  | 13    | 9.9E-1  | 1.0E0     |
| <input type="checkbox"/> | GOTERM_CC_ALL          | <a href="#">organelle inner membrane</a>                                                             | <a href="#">RT</a> |  |  |  | 13    | 9.9E-1  | 1.0E0     |
| <input type="checkbox"/> | GOTERM_CC_ALL          | <a href="#">organelle envelope</a>                                                                   | <a href="#">RT</a> |  |  |  | 23    | 1.0E0   | 1.0E0     |
| <input type="checkbox"/> | GOTERM_CC_ALL          | <a href="#">envelope</a>                                                                             | <a href="#">RT</a> |  |  |  | 23    | 1.0E0   | 1.0E0     |
|                          | Annotation Cluster 290 | Enrichment Score: 0.01                                                                               | <b>G</b>           |  |  |  | Count | P_Value | Benjamini |
| <input type="checkbox"/> | GOTERM_MF_ALL          | <a href="#">active transmembrane transporter activity</a>                                            | <a href="#">RT</a> |  |  |  | 26    | 8.4E-1  | 1.0E0     |
| <input type="checkbox"/> | SP_PIR_KEYWORDS        | <a href="#">ion transport</a>                                                                        | <a href="#">RT</a> |  |  |  | 21    | 1.0E0   | 1.0E0     |
| <input type="checkbox"/> | GOTERM_BP_ALL          | <a href="#">metal ion transport</a>                                                                  | <a href="#">RT</a> |  |  |  | 18    | 1.0E0   | 1.0E0     |
| <input type="checkbox"/> | GOTERM_BP_ALL          | <a href="#">cation transport</a>                                                                     | <a href="#">RT</a> |  |  |  | 23    | 1.0E0   | 1.0E0     |
| <input type="checkbox"/> | GOTERM_MF_ALL          | <a href="#">substrate-specific transporter activity</a>                                              | <a href="#">RT</a> |  |  |  | 53    | 1.0E0   | 1.0E0     |
| <input type="checkbox"/> | GOTERM_BP_ALL          | <a href="#">monovalent inorganic cation transport</a>                                                | <a href="#">RT</a> |  |  |  | 11    | 1.0E0   | 1.0E0     |
| <input type="checkbox"/> | GOTERM_MF_ALL          | <a href="#">cation transmembrane transporter activity</a>                                            | <a href="#">RT</a> |  |  |  | 20    | 1.0E0   | 1.0E0     |
| <input type="checkbox"/> | GOTERM_MF_ALL          | <a href="#">ion transmembrane transporter activity</a>                                               | <a href="#">RT</a> |  |  |  | 28    | 1.0E0   | 1.0E0     |
| <input type="checkbox"/> | GOTERM_MF_ALL          | <a href="#">substrate-specific transmembrane transporter activity</a>                                | <a href="#">RT</a> |  |  |  | 35    | 1.0E0   | 1.0E0     |
| <input type="checkbox"/> | GOTERM_MF_ALL          | <a href="#">transmembrane transporter activity</a>                                                   | <a href="#">RT</a> |  |  |  | 41    | 1.0E0   | 1.0E0     |
| <input type="checkbox"/> | GOTERM_MF_ALL          | <a href="#">transporter activity</a>                                                                 | <a href="#">RT</a> |  |  |  | 69    | 1.0E0   | 1.0E0     |
| <input type="checkbox"/> | GOTERM_BP_ALL          | <a href="#">ion transport</a>                                                                        | <a href="#">RT</a> |  |  |  | 32    | 1.0E0   | 1.0E0     |
|                          | Annotation Cluster 291 | Enrichment Score: 0.01                                                                               | <b>G</b>           |  |  |  | Count | P_Value | Benjamini |
| <input type="checkbox"/> | UP_SEQ_FEATURE         | active site:Charge relay system                                                                      | <a href="#">RT</a> |  |  |  | 7     | 9.6E-1  | 1.0E0     |
| <input type="checkbox"/> | GOTERM_MF_ALL          | <a href="#">serine-type peptidase activity</a>                                                       | <a href="#">RT</a> |  |  |  | 11    | 9.9E-1  | 1.0E0     |
| <input type="checkbox"/> | GOTERM_MF_ALL          | <a href="#">serine hydrolase activity</a>                                                            | <a href="#">RT</a> |  |  |  | 11    | 9.9E-1  | 1.0E0     |

| <input type="checkbox"/> |                        |                                                              |                    |  |  |  |  |       |         |           |
|--------------------------|------------------------|--------------------------------------------------------------|--------------------|--|--|--|--|-------|---------|-----------|
| <input type="checkbox"/> | INTERPRO               | <a href="#">Peptidase S1A, chymotrypsin</a>                  | <a href="#">RT</a> |  |  |  |  | 5     | 9.9E-1  | 1.0E0     |
| <input type="checkbox"/> | SP_PIR_KEYWORDS        | <a href="#">serine protease</a>                              | <a href="#">RT</a> |  |  |  |  | 6     | 9.9E-1  | 1.0E0     |
| <input type="checkbox"/> | INTERPRO               | <a href="#">Peptidase S1 and S6, chymotrypsin/Hap</a>        | <a href="#">RT</a> |  |  |  |  | 5     | 9.9E-1  | 1.0E0     |
| <input type="checkbox"/> | GOTERM_MF_ALL          | <a href="#">serine-type endopeptidase activity</a>           | <a href="#">RT</a> |  |  |  |  | 9     | 9.9E-1  | 1.0E0     |
| <input type="checkbox"/> | SMART                  | <a href="#">Tryp_Spc</a>                                     | <a href="#">RT</a> |  |  |  |  | 5     | 1.0E0   | 1.0E0     |
|                          | Annotation Cluster 292 | Enrichment Score: 0                                          | <b>G</b>           |  |  |  |  | Count | P_Value | Benjamini |
| <input type="checkbox"/> | SP_PIR_KEYWORDS        | <a href="#">potassium</a>                                    | <a href="#">RT</a> |  |  |  |  | 5     | 9.7E-1  | 1.0E0     |
| <input type="checkbox"/> | GOTERM_MF_ALL          | <a href="#">potassium ion binding</a>                        | <a href="#">RT</a> |  |  |  |  | 5     | 9.8E-1  | 1.0E0     |
| <input type="checkbox"/> | SP_PIR_KEYWORDS        | <a href="#">potassium transport</a>                          | <a href="#">RT</a> |  |  |  |  | 3     | 1.0E0   | 1.0E0     |
| <input type="checkbox"/> | GOTERM_BP_ALL          | <a href="#">potassium ion transport</a>                      | <a href="#">RT</a> |  |  |  |  | 6     | 1.0E0   | 1.0E0     |
| <input type="checkbox"/> | GOTERM_MF_ALL          | <a href="#">alkali metal ion binding</a>                     | <a href="#">RT</a> |  |  |  |  | 7     | 1.0E0   | 1.0E0     |
|                          | Annotation Cluster 293 | Enrichment Score: 0                                          | <b>G</b>           |  |  |  |  | Count | P_Value | Benjamini |
| <input type="checkbox"/> | GOTERM_BP_ALL          | <a href="#">transmission of nerve impulse</a>                | <a href="#">RT</a> |  |  |  |  | 15    | 9.8E-1  | 1.0E0     |
| <input type="checkbox"/> | GOTERM_BP_ALL          | <a href="#">synaptic transmission</a>                        | <a href="#">RT</a> |  |  |  |  | 11    | 9.9E-1  | 1.0E0     |
| <input type="checkbox"/> | GOTERM_BP_ALL          | <a href="#">cell-cell signaling</a>                          | <a href="#">RT</a> |  |  |  |  | 20    | 1.0E0   | 1.0E0     |
| <input type="checkbox"/> | GOTERM_BP_ALL          | <a href="#">neurological system process</a>                  | <a href="#">RT</a> |  |  |  |  | 30    | 1.0E0   | 1.0E0     |
|                          | Annotation Cluster 294 | Enrichment Score: 0                                          | <b>G</b>           |  |  |  |  | Count | P_Value | Benjamini |
| <input type="checkbox"/> | SP_PIR_KEYWORDS        | <a href="#">sodium</a>                                       | <a href="#">RT</a> |  |  |  |  | 3     | 9.8E-1  | 1.0E0     |
| <input type="checkbox"/> | SP_PIR_KEYWORDS        | <a href="#">sodium transport</a>                             | <a href="#">RT</a> |  |  |  |  | 3     | 9.9E-1  | 1.0E0     |
| <input type="checkbox"/> | GOTERM_MF_ALL          | <a href="#">sodium ion binding</a>                           | <a href="#">RT</a> |  |  |  |  | 3     | 9.9E-1  | 1.0E0     |
| <input type="checkbox"/> | GOTERM_BP_ALL          | <a href="#">sodium ion transport</a>                         | <a href="#">RT</a> |  |  |  |  | 4     | 1.0E0   | 1.0E0     |
| <input type="checkbox"/> | GOTERM_MF_ALL          | <a href="#">alkali metal ion binding</a>                     | <a href="#">RT</a> |  |  |  |  | 7     | 1.0E0   | 1.0E0     |
|                          | Annotation Cluster 295 | Enrichment Score: 0                                          | <b>G</b>           |  |  |  |  | Count | P_Value | Benjamini |
| <input type="checkbox"/> | GOTERM_CC_ALL          | <a href="#">voltage-gated potassium channel complex</a>      | <a href="#">RT</a> |  |  |  |  | 3     | 9.7E-1  | 1.0E0     |
| <input type="checkbox"/> | GOTERM_MF_ALL          | <a href="#">ligand-gated channel activity</a>                | <a href="#">RT</a> |  |  |  |  | 4     | 9.8E-1  | 1.0E0     |
| <input type="checkbox"/> | GOTERM_MF_ALL          | <a href="#">ligand-gated ion channel activity</a>            | <a href="#">RT</a> |  |  |  |  | 4     | 9.8E-1  | 1.0E0     |
| <input type="checkbox"/> | GOTERM_MF_ALL          | <a href="#">voltage-gated potassium channel activity</a>     | <a href="#">RT</a> |  |  |  |  | 3     | 1.0E0   | 1.0E0     |
| <input type="checkbox"/> | GOTERM_BP_ALL          | <a href="#">potassium ion transport</a>                      | <a href="#">RT</a> |  |  |  |  | 6     | 1.0E0   | 1.0E0     |
| <input type="checkbox"/> | GOTERM_MF_ALL          | <a href="#">voltage-gated ion channel activity</a>           | <a href="#">RT</a> |  |  |  |  | 5     | 1.0E0   | 1.0E0     |
| <input type="checkbox"/> | GOTERM_MF_ALL          | <a href="#">voltage-gated channel activity</a>               | <a href="#">RT</a> |  |  |  |  | 5     | 1.0E0   | 1.0E0     |
| <input type="checkbox"/> | GOTERM_MF_ALL          | <a href="#">voltage-gated cation channel activity</a>        | <a href="#">RT</a> |  |  |  |  | 3     | 1.0E0   | 1.0E0     |
| <input type="checkbox"/> | SP_PIR_KEYWORDS        | <a href="#">voltage-gated channel</a>                        | <a href="#">RT</a> |  |  |  |  | 3     | 1.0E0   | 1.0E0     |
| <input type="checkbox"/> | GOTERM_MF_ALL          | <a href="#">potassium channel activity</a>                   | <a href="#">RT</a> |  |  |  |  | 3     | 1.0E0   | 1.0E0     |
| <input type="checkbox"/> | GOTERM_MF_ALL          | <a href="#">gated channel activity</a>                       | <a href="#">RT</a> |  |  |  |  | 9     | 1.0E0   | 1.0E0     |
| <input type="checkbox"/> | GOTERM_MF_ALL          | <a href="#">cation channel activity</a>                      | <a href="#">RT</a> |  |  |  |  | 7     | 1.0E0   | 1.0E0     |
| <input type="checkbox"/> | GOTERM_MF_ALL          | <a href="#">metal ion transmembrane transporter activity</a> | <a href="#">RT</a> |  |  |  |  | 9     | 1.0E0   | 1.0E0     |
| <input type="checkbox"/> | SP_PIR_KEYWORDS        | <a href="#">Ionic channel</a>                                | <a href="#">RT</a> |  |  |  |  | 7     | 1.0E0   | 1.0E0     |
| <input type="checkbox"/> | GOTERM_MF_ALL          | <a href="#">ion channel activity</a>                         | <a href="#">RT</a> |  |  |  |  | 9     | 1.0E0   | 1.0E0     |
| <input type="checkbox"/> | GOTERM_MF_ALL          | <a href="#">substrate specific channel activity</a>          | <a href="#">RT</a> |  |  |  |  | 9     | 1.0E0   | 1.0E0     |
| <input type="checkbox"/> | GOTERM_MF_ALL          | <a href="#">passive transmembrane transporter activity</a>   | <a href="#">RT</a> |  |  |  |  | 9     | 1.0E0   | 1.0E0     |
| <input type="checkbox"/> | GOTERM_MF_ALL          | <a href="#">channel activity</a>                             | <a href="#">RT</a> |  |  |  |  | 9     | 1.0E0   | 1.0E0     |
|                          | Annotation Cluster 296 | Enrichment Score: 0                                          | <b>G</b>           |  |  |  |  | Count | P_Value | Benjamini |
| <input type="checkbox"/> | GOTERM_CC_ALL          | <a href="#">non-membrane-bound organelle</a>                 | <a href="#">RT</a> |  |  |  |  | 99    | 1.0E0   | 1.0E0     |
| <input type="checkbox"/> | GOTERM_CC_ALL          | <a href="#">intracellular non-membrane-bound organelle</a>   | <a href="#">RT</a> |  |  |  |  | 99    | 1.0E0   | 1.0E0     |
| <input type="checkbox"/> | GOTERM_CC_ALL          | <a href="#">organelle part</a>                               | <a href="#">RT</a> |  |  |  |  | 160   | 1.0E0   | 1.0E0     |
| <input type="checkbox"/> | GOTERM_CC_ALL          | <a href="#">intracellular organelle part</a>                 | <a href="#">RT</a> |  |  |  |  | 159   | 1.0E0   | 1.0E0     |
|                          | Annotation Cluster 297 | Enrichment Score: 0                                          | <b>G</b>           |  |  |  |  | Count | P_Value | Benjamini |
| <input type="checkbox"/> | GOTERM_BP_ALL          | <a href="#">mRNA metabolic process</a>                       | <a href="#">RT</a> |  |  |  |  | 12    | 1.0E0   | 1.0E0     |
| <input type="checkbox"/> | GOTERM_BP_ALL          | <a href="#">mRNA processing</a>                              | <a href="#">RT</a> |  |  |  |  | 10    | 1.0E0   | 1.0E0     |

| <input type="checkbox"/> |                        |                                               |                     |          |  | Count | P_Value | Benjamini |
|--------------------------|------------------------|-----------------------------------------------|---------------------|----------|--|-------|---------|-----------|
| <input type="checkbox"/> | GOTERM_BP_ALL          | <a href="#">RNA splicing</a>                  | RT                  |          |  | 6     | 1.0E0   | 1.0E0     |
| <input type="checkbox"/> | GOTERM_BP_ALL          | <a href="#">RNA processing</a>                | RT                  |          |  | 13    | 1.0E0   | 1.0E0     |
|                          | Annotation Cluster 298 |                                               | Enrichment Score: 0 | <b>G</b> |  |       |         |           |
| <input type="checkbox"/> | INTERPRO               | <a href="#">Homeobox</a>                      | RT                  |          |  | 7     | 1.0E0   | 1.0E0     |
| <input type="checkbox"/> | UP_SEQ_FEATURE         | DNA-binding region:Homeobox                   | RT                  |          |  | 4     | 1.0E0   | 1.0E0     |
| <input type="checkbox"/> | SP_PIR_KEYWORDS        | <a href="#">Homeobox</a>                      | RT                  |          |  | 8     | 1.0E0   | 1.0E0     |
| <input type="checkbox"/> | INTERPRO               | <a href="#">Homeodomain-related</a>           | RT                  |          |  | 5     | 1.0E0   | 1.0E0     |
| <input type="checkbox"/> | SMART                  | <a href="#">HOX</a>                           | RT                  |          |  | 7     | 1.0E0   | 1.0E0     |
|                          | Annotation Cluster 299 |                                               | Enrichment Score: 0 | <b>G</b> |  |       |         |           |
| <input type="checkbox"/> | GOTERM_BP_ALL          | <a href="#">localization</a>                  | RT                  |          |  | 206   | 1.0E0   | 1.0E0     |
| <input type="checkbox"/> | SP_PIR_KEYWORDS        | <a href="#">transport</a>                     | RT                  |          |  | 77    | 1.0E0   | 1.0E0     |
| <input type="checkbox"/> | GOTERM_BP_ALL          | <a href="#">transport</a>                     | RT                  |          |  | 168   | 1.0E0   | 1.0E0     |
| <input type="checkbox"/> | GOTERM_BP_ALL          | <a href="#">establishment of localization</a> | RT                  |          |  | 171   | 1.0E0   | 1.0E0     |
| <input type="checkbox"/> | GOTERM_MF_ALL          | <a href="#">transporter activity</a>          | RT                  |          |  | 69    | 1.0E0   | 1.0E0     |
|                          | Annotation Cluster 300 |                                               | Enrichment Score: 0 | <b>G</b> |  |       |         |           |
| <input type="checkbox"/> | GOTERM_BP_ALL          | <a href="#">RNA splicing</a>                  | RT                  |          |  | 6     | 1.0E0   | 1.0E0     |
| <input type="checkbox"/> | SP_PIR_KEYWORDS        | <a href="#">mrna splicing</a>                 | RT                  |          |  | 3     | 1.0E0   | 1.0E0     |
| <input type="checkbox"/> | SP_PIR_KEYWORDS        | <a href="#">mrna processing</a>               | RT                  |          |  | 3     | 1.0E0   | 1.0E0     |

650 terms were not clustered.

Please cite the web site or [Genome Biology 2003; 4\(5\):P3](#) within any publication that makes use of any methods inspired by DAVID.

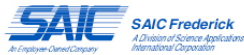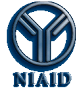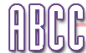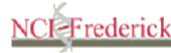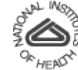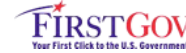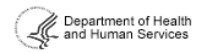

[Term of Service](#) | [Contact Us](#) | [Site Map](#)



## Functional Annotation Clustering Of Genes Downregulated <0.5 in WT But Not In WASP Deficient BMBCs

[Help and Manual](#)

Current Gene List: wt1 not wsp1 <.5lo

377 DAVID IDs

Options Classification Stringency Medium

Rerun using options

Create Sublist

[Download File](#)

| Annotation Cluster 1                     | Enrichment Score: 5                                                                                 | G                  | Count | P_Value | Benjamini |
|------------------------------------------|-----------------------------------------------------------------------------------------------------|--------------------|-------|---------|-----------|
| <input type="checkbox"/> GOTERM_CC_ALL   | <a href="#">nucleus</a>                                                                             | <a href="#">RT</a> | 123   | 2.9E-13 | 2.3E-10   |
| <input type="checkbox"/> GOTERM_CC_ALL   | <a href="#">intracellular membrane-bound organelle</a>                                              | <a href="#">RT</a> | 157   | 4.1E-10 | 1.6E-7    |
| <input type="checkbox"/> GOTERM_CC_ALL   | <a href="#">membrane-bound organelle</a>                                                            | <a href="#">RT</a> | 157   | 4.5E-10 | 1.2E-7    |
| <input type="checkbox"/> GOTERM_CC_ALL   | <a href="#">intracellular organelle</a>                                                             | <a href="#">RT</a> | 168   | 2.3E-9  | 4.4E-7    |
| <input type="checkbox"/> GOTERM_CC_ALL   | <a href="#">organelle</a>                                                                           | <a href="#">RT</a> | 168   | 2.5E-9  | 3.8E-7    |
| <input type="checkbox"/> SP_PIR_KEYWORDS | <a href="#">nucleus</a>                                                                             | <a href="#">RT</a> | 91    | 2.6E-8  | 2.2E-5    |
| <input type="checkbox"/> GOTERM_CC_ALL   | <a href="#">intracellular</a>                                                                       | <a href="#">RT</a> | 193   | 3.4E-8  | 4.4E-6    |
| <input type="checkbox"/> GOTERM_CC_ALL   | <a href="#">intracellular part</a>                                                                  | <a href="#">RT</a> | 185   | 9.4E-8  | 1.0E-5    |
| <input type="checkbox"/> GOTERM_BP_ALL   | <a href="#">transcription</a>                                                                       | <a href="#">RT</a> | 72    | 3.4E-7  | 5.9E-4    |
| <input type="checkbox"/> GOTERM_BP_ALL   | <a href="#">regulation of nucleobase, nucleoside, nucleotide and nucleic acid metabolic process</a> | <a href="#">RT</a> | 70    | 9.2E-7  | 1.2E-3    |
| <input type="checkbox"/> GOTERM_BP_ALL   | <a href="#">regulation of transcription</a>                                                         | <a href="#">RT</a> | 69    | 1.0E-6  | 1.0E-3    |
| <input type="checkbox"/> GOTERM_BP_ALL   | <a href="#">RNA biosynthetic process</a>                                                            | <a href="#">RT</a> | 67    | 1.3E-6  | 1.1E-3    |
| <input type="checkbox"/> GOTERM_BP_ALL   | <a href="#">regulation of gene expression</a>                                                       | <a href="#">RT</a> | 71    | 2.5E-6  | 1.8E-3    |
| <input type="checkbox"/> GOTERM_BP_ALL   | <a href="#">transcription, DNA-dependent</a>                                                        | <a href="#">RT</a> | 66    | 2.6E-6  | 1.7E-3    |
| <input type="checkbox"/> GOTERM_BP_ALL   | <a href="#">regulation of transcription, DNA-dependent</a>                                          | <a href="#">RT</a> | 65    | 3.7E-6  | 2.1E-3    |
| <input type="checkbox"/> GOTERM_BP_ALL   | <a href="#">regulation of cellular metabolic process</a>                                            | <a href="#">RT</a> | 72    | 5.3E-6  | 2.5E-3    |
| <input type="checkbox"/> SP_PIR_KEYWORDS | <a href="#">Transcription</a>                                                                       | <a href="#">RT</a> | 45    | 6.4E-6  | 2.8E-3    |
| <input type="checkbox"/> GOTERM_BP_ALL   | <a href="#">RNA metabolic process</a>                                                               | <a href="#">RT</a> | 74    | 6.5E-6  | 2.6E-3    |
| <input type="checkbox"/> GOTERM_BP_ALL   | <a href="#">regulation of cellular process</a>                                                      | <a href="#">RT</a> | 96    | 1.2E-5  | 4.3E-3    |
| <input type="checkbox"/> GOTERM_BP_ALL   | <a href="#">regulation of metabolic process</a>                                                     | <a href="#">RT</a> | 73    | 1.2E-5  | 4.0E-3    |
| <input type="checkbox"/> GOTERM_MF_ALL   | <a href="#">nucleic acid binding</a>                                                                | <a href="#">RT</a> | 82    | 1.9E-5  | 4.9E-2    |
| <input type="checkbox"/> GOTERM_BP_ALL   | <a href="#">biopolymer metabolic process</a>                                                        | <a href="#">RT</a> | 110   | 2.0E-5  | 6.6E-3    |
| <input type="checkbox"/> GOTERM_BP_ALL   | <a href="#">gene expression</a>                                                                     | <a href="#">RT</a> | 82    | 2.1E-5  | 6.4E-3    |
| <input type="checkbox"/> SP_PIR_KEYWORDS | <a href="#">Transcription regulation</a>                                                            | <a href="#">RT</a> | 43    | 2.1E-5  | 6.1E-3    |
| <input type="checkbox"/> GOTERM_BP_ALL   | <a href="#">regulation of biological process</a>                                                    | <a href="#">RT</a> | 102   | 2.4E-5  | 6.9E-3    |
| <input type="checkbox"/> SP_PIR_KEYWORDS | <a href="#">repressor</a>                                                                           | <a href="#">RT</a> | 17    | 4.2E-5  | 9.0E-3    |
| <input type="checkbox"/> GOTERM_BP_ALL   | <a href="#">nucleobase, nucleoside, nucleotide and nucleic acid metabolic process</a>               | <a href="#">RT</a> | 86    | 4.6E-5  | 1.1E-2    |
| <input type="checkbox"/> GOTERM_BP_ALL   | <a href="#">cellular metabolic process</a>                                                          | <a href="#">RT</a> | 149   | 7.4E-5  | 1.7E-2    |
| <input type="checkbox"/> GOTERM_BP_ALL   | <a href="#">metabolic process</a>                                                                   | <a href="#">RT</a> | 161   | 9.3E-5  | 2.1E-2    |
| <input type="checkbox"/> GOTERM_MF_ALL   | <a href="#">DNA binding</a>                                                                         | <a href="#">RT</a> | 56    | 1.4E-4  | 7.2E-2    |
| <input type="checkbox"/> GOTERM_BP_ALL   | <a href="#">biological regulation</a>                                                               | <a href="#">RT</a> | 105   | 2.6E-4  | 4.3E-2    |
| <input type="checkbox"/> GOTERM_BP_ALL   | <a href="#">macromolecule metabolic process</a>                                                     | <a href="#">RT</a> | 130   | 6.0E-4  | 9.2E-2    |
| <input type="checkbox"/> GOTERM_BP_ALL   | <a href="#">primary metabolic process</a>                                                           | <a href="#">RT</a> | 145   | 6.5E-4  | 9.6E-2    |
| <input type="checkbox"/> GOTERM_BP_ALL   | <a href="#">cellular process</a>                                                                    | <a href="#">RT</a> | 201   | 1.9E-3  | 2.4E-1    |
| <input type="checkbox"/> SP_PIR_KEYWORDS | <a href="#">dna-binding</a>                                                                         | <a href="#">RT</a> | 36    | 3.8E-3  | 2.8E-1    |
| <input type="checkbox"/> GOTERM_MF_ALL   | <a href="#">transcription regulator activity</a>                                                    | <a href="#">RT</a> | 36    | 4.1E-3  | 6.3E-1    |

| <input type="checkbox"/> |                      |                                                                             |                    |  |       |         |           |  |  |
|--------------------------|----------------------|-----------------------------------------------------------------------------|--------------------|--|-------|---------|-----------|--|--|
| <input type="checkbox"/> | GOTERM_CC_ALL        | <a href="#">cell part</a>                                                   | <a href="#">RT</a> |  | 225   | 4.5E-3  | 3.2E-1    |  |  |
| <input type="checkbox"/> | GOTERM_CC_ALL        | <a href="#">cell</a>                                                        | <a href="#">RT</a> |  | 225   | 4.5E-3  | 3.2E-1    |  |  |
| <input type="checkbox"/> | GOTERM_CC_ALL        | <a href="#">cytoplasm</a>                                                   | <a href="#">RT</a> |  | 113   | 1.4E-2  | 6.3E-1    |  |  |
| <input type="checkbox"/> | GOTERM_MF_ALL        | <a href="#">transcription factor activity</a>                               | <a href="#">RT</a> |  | 26    | 1.6E-2  | 9.5E-1    |  |  |
| <input type="checkbox"/> | GOTERM_MF_ALL        | <a href="#">binding</a>                                                     | <a href="#">RT</a> |  | 199   | 2.0E-2  | 9.7E-1    |  |  |
| <input type="checkbox"/> | GOTERM_MF_ALL        | <a href="#">sequence-specific DNA binding</a>                               | <a href="#">RT</a> |  | 15    | 5.0E-2  | 1.0E0     |  |  |
|                          | Annotation Cluster 2 | Enrichment Score: 3.76                                                      | <b>G</b>           |  | Count | P_Value | Benjamini |  |  |
| <input type="checkbox"/> | GOTERM_MF_ALL        | <a href="#">zinc ion binding</a>                                            | <a href="#">RT</a> |  | 58    | 1.9E-5  | 2.6E-2    |  |  |
| <input type="checkbox"/> | GOTERM_MF_ALL        | <a href="#">transition metal ion binding</a>                                | <a href="#">RT</a> |  | 68    | 2.1E-5  | 1.4E-2    |  |  |
| <input type="checkbox"/> | SP_PIR_KEYWORDS      | <a href="#">zinc-finger</a>                                                 | <a href="#">RT</a> |  | 41    | 4.9E-5  | 8.4E-3    |  |  |
| <input type="checkbox"/> | SP_PIR_KEYWORDS      | <a href="#">zinc</a>                                                        | <a href="#">RT</a> |  | 48    | 7.2E-5  | 1.0E-2    |  |  |
| <input type="checkbox"/> | GOTERM_MF_ALL        | <a href="#">metal ion binding</a>                                           | <a href="#">RT</a> |  | 87    | 4.9E-4  | 1.7E-1    |  |  |
| <input type="checkbox"/> | GOTERM_MF_ALL        | <a href="#">ion binding</a>                                                 | <a href="#">RT</a> |  | 88    | 6.2E-4  | 1.9E-1    |  |  |
| <input type="checkbox"/> | SP_PIR_KEYWORDS      | <a href="#">metal-binding</a>                                               | <a href="#">RT</a> |  | 57    | 6.9E-4  | 7.2E-2    |  |  |
| <input type="checkbox"/> | GOTERM_MF_ALL        | <a href="#">cation binding</a>                                              | <a href="#">RT</a> |  | 78    | 2.8E-3  | 5.6E-1    |  |  |
|                          | Annotation Cluster 3 | Enrichment Score: 2.82                                                      | <b>G</b>           |  | Count | P_Value | Benjamini |  |  |
| <input type="checkbox"/> | GOTERM_BP_ALL        | <a href="#">biotin biosynthetic process</a>                                 | <a href="#">RT</a> |  | 7     | 2.0E-10 | 1.0E-6    |  |  |
| <input type="checkbox"/> | GOTERM_BP_ALL        | <a href="#">biotin metabolic process</a>                                    | <a href="#">RT</a> |  | 7     | 2.3E-9  | 5.9E-6    |  |  |
| <input type="checkbox"/> | GOTERM_BP_ALL        | <a href="#">water-soluble vitamin biosynthetic process</a>                  | <a href="#">RT</a> |  | 7     | 4.9E-6  | 2.5E-3    |  |  |
| <input type="checkbox"/> | GOTERM_BP_ALL        | <a href="#">vitamin biosynthetic process</a>                                | <a href="#">RT</a> |  | 7     | 6.2E-6  | 2.7E-3    |  |  |
| <input type="checkbox"/> | INTERPRO             | <a href="#">Biotin synthase</a>                                             | <a href="#">RT</a> |  | 4     | 1.9E-5  | 5.4E-2    |  |  |
| <input type="checkbox"/> | INTERPRO             | <a href="#">Biotin and thiamin synthesis associated</a>                     | <a href="#">RT</a> |  | 4     | 1.9E-5  | 5.4E-2    |  |  |
| <input type="checkbox"/> | GOTERM_MF_ALL        | <a href="#">biotin synthase activity</a>                                    | <a href="#">RT</a> |  | 4     | 2.0E-5  | 1.8E-2    |  |  |
| <input type="checkbox"/> | GOTERM_BP_ALL        | <a href="#">sulfur compound biosynthetic process</a>                        | <a href="#">RT</a> |  | 7     | 1.0E-4  | 2.1E-2    |  |  |
| <input type="checkbox"/> | GOTERM_BP_ALL        | <a href="#">water-soluble vitamin metabolic process</a>                     | <a href="#">RT</a> |  | 7     | 2.1E-4  | 3.7E-2    |  |  |
| <input type="checkbox"/> | GOTERM_MF_ALL        | <a href="#">sulfurtransferase activity</a>                                  | <a href="#">RT</a> |  | 4     | 4.0E-4  | 1.6E-1    |  |  |
| <input type="checkbox"/> | INTERPRO             | <a href="#">Elongator protein 3/MiaB/NifB</a>                               | <a href="#">RT</a> |  | 4     | 5.4E-4  | 6.5E-1    |  |  |
| <input type="checkbox"/> | INTERPRO             | <a href="#">Radical SAM</a>                                                 | <a href="#">RT</a> |  | 4     | 5.4E-4  | 6.5E-1    |  |  |
| <input type="checkbox"/> | SP_PIR_KEYWORDS      | <a href="#">biotin biosynthesis</a>                                         | <a href="#">RT</a> |  | 3     | 8.5E-4  | 7.9E-2    |  |  |
| <input type="checkbox"/> | SMART                | <a href="#">Elp3</a>                                                        | <a href="#">RT</a> |  | 4     | 8.6E-4  | 4.0E-1    |  |  |
| <input type="checkbox"/> | COG_ONTOLOGY         | <a href="#">Coenzyme metabolism</a>                                         | <a href="#">RT</a> |  | 5     | 1.8E-3  | 1.3E-1    |  |  |
| <input type="checkbox"/> | GOTERM_BP_ALL        | <a href="#">vitamin metabolic process</a>                                   | <a href="#">RT</a> |  | 7     | 1.9E-3  | 2.4E-1    |  |  |
| <input type="checkbox"/> | GOTERM_BP_ALL        | <a href="#">monocarboxylic acid metabolic process</a>                       | <a href="#">RT</a> |  | 12    | 2.4E-3  | 2.8E-1    |  |  |
| <input type="checkbox"/> | GOTERM_BP_ALL        | <a href="#">sulfur metabolic process</a>                                    | <a href="#">RT</a> |  | 7     | 3.1E-3  | 3.3E-1    |  |  |
| <input type="checkbox"/> | GOTERM_MF_ALL        | <a href="#">2 iron, 2 sulfur cluster binding</a>                            | <a href="#">RT</a> |  | 4     | 3.5E-3  | 6.1E-1    |  |  |
| <input type="checkbox"/> | GOTERM_BP_ALL        | <a href="#">heterocycle metabolic process</a>                               | <a href="#">RT</a> |  | 7     | 3.7E-3  | 3.8E-1    |  |  |
| <input type="checkbox"/> | SP_PIR_KEYWORDS      | <a href="#">4Fe-4S</a>                                                      | <a href="#">RT</a> |  | 4     | 5.9E-3  | 3.5E-1    |  |  |
| <input type="checkbox"/> | GOTERM_MF_ALL        | <a href="#">4 iron, 4 sulfur cluster binding</a>                            | <a href="#">RT</a> |  | 4     | 7.1E-3  | 7.9E-1    |  |  |
| <input type="checkbox"/> | INTERPRO             | <a href="#">Aldolase-type TIM barrel</a>                                    | <a href="#">RT</a> |  | 4     | 1.5E-2  | 1.0E0     |  |  |
| <input type="checkbox"/> | SP_PIR_KEYWORDS      | <a href="#">iron-sulfur</a>                                                 | <a href="#">RT</a> |  | 4     | 2.8E-2  | 8.3E-1    |  |  |
| <input type="checkbox"/> | SP_PIR_KEYWORDS      | <a href="#">s-adenosyl-l-methionine</a>                                     | <a href="#">RT</a> |  | 5     | 3.0E-2  | 8.3E-1    |  |  |
| <input type="checkbox"/> | GOTERM_MF_ALL        | <a href="#">metal cluster binding</a>                                       | <a href="#">RT</a> |  | 4     | 5.3E-2  | 1.0E0     |  |  |
| <input type="checkbox"/> | GOTERM_MF_ALL        | <a href="#">iron-sulfur cluster binding</a>                                 | <a href="#">RT</a> |  | 4     | 5.3E-2  | 1.0E0     |  |  |
| <input type="checkbox"/> | GOTERM_MF_ALL        | <a href="#">transferase activity, transferring sulfur-containing groups</a> | <a href="#">RT</a> |  | 4     | 6.7E-2  | 1.0E0     |  |  |
| <input type="checkbox"/> | GOTERM_BP_ALL        | <a href="#">cofactor metabolic process</a>                                  | <a href="#">RT</a> |  | 8     | 9.2E-2  | 1.0E0     |  |  |
| <input type="checkbox"/> | GOTERM_BP_ALL        | <a href="#">carboxylic acid metabolic process</a>                           | <a href="#">RT</a> |  | 13    | 1.9E-1  | 1.0E0     |  |  |
| <input type="checkbox"/> | GOTERM_BP_ALL        | <a href="#">organic acid metabolic process</a>                              | <a href="#">RT</a> |  | 13    | 1.9E-1  | 1.0E0     |  |  |
| <input type="checkbox"/> | SP_PIR_KEYWORDS      | <a href="#">iron</a>                                                        | <a href="#">RT</a> |  | 6     | 4.4E-1  | 1.0E0     |  |  |
| <input type="checkbox"/> | GOTERM_MF_ALL        | <a href="#">iron ion binding</a>                                            | <a href="#">RT</a> |  | 7     | 4.7E-1  | 1.0E0     |  |  |



|                          |                 |                                                                                     |                        |          | Count | P_Value | Benjamini |
|--------------------------|-----------------|-------------------------------------------------------------------------------------|------------------------|----------|-------|---------|-----------|
| <input type="checkbox"/> | GOTERM_BP_ALL   | <a href="#">biosynthetic process</a>                                                | <a href="#">RT</a>     |          | 21    | 7.3E-1  | 1.0E0     |
| <input type="checkbox"/> | GOTERM_BP_ALL   | <a href="#">cellular biosynthetic process</a>                                       | <a href="#">RT</a>     |          | 15    | 7.8E-1  | 1.0E0     |
|                          |                 | Annotation Cluster 4                                                                | Enrichment Score: 1.93 | <b>G</b> |       |         |           |
| <input type="checkbox"/> | GOTERM_BP_ALL   | <a href="#">skeletal muscle fiber development</a>                                   | <a href="#">RT</a>     |          | 9     | 3.4E-5  | 8.8E-3    |
| <input type="checkbox"/> | GOTERM_BP_ALL   | <a href="#">muscle fiber development</a>                                            | <a href="#">RT</a>     |          | 9     | 3.4E-5  | 8.8E-3    |
| <input type="checkbox"/> | GOTERM_BP_ALL   | <a href="#">myoblast differentiation</a>                                            | <a href="#">RT</a>     |          | 7     | 1.1E-4  | 2.3E-2    |
| <input type="checkbox"/> | GOTERM_BP_ALL   | <a href="#">skeletal muscle development</a>                                         | <a href="#">RT</a>     |          | 10    | 1.2E-4  | 2.4E-2    |
| <input type="checkbox"/> | GOTERM_BP_ALL   | <a href="#">muscle development</a>                                                  | <a href="#">RT</a>     |          | 13    | 1.3E-4  | 2.5E-2    |
| <input type="checkbox"/> | GOTERM_BP_ALL   | <a href="#">striated muscle development</a>                                         | <a href="#">RT</a>     |          | 11    | 1.9E-4  | 3.4E-2    |
| <input type="checkbox"/> | GOTERM_BP_ALL   | <a href="#">muscle cell differentiation</a>                                         | <a href="#">RT</a>     |          | 8     | 4.1E-4  | 6.6E-2    |
| <input type="checkbox"/> | GOTERM_BP_ALL   | <a href="#">myoblast maturation</a>                                                 | <a href="#">RT</a>     |          | 5     | 9.0E-4  | 1.3E-1    |
| <input type="checkbox"/> | GOTERM_BP_ALL   | <a href="#">myoblast development</a>                                                | <a href="#">RT</a>     |          | 5     | 1.0E-3  | 1.4E-1    |
| <input type="checkbox"/> | GOTERM_BP_ALL   | <a href="#">cell maturation</a>                                                     | <a href="#">RT</a>     |          | 7     | 4.9E-3  | 4.6E-1    |
| <input type="checkbox"/> | GOTERM_BP_ALL   | <a href="#">developmental maturation</a>                                            | <a href="#">RT</a>     |          | 7     | 1.1E-2  | 7.3E-1    |
| <input type="checkbox"/> | GOTERM_BP_ALL   | <a href="#">striated muscle cell differentiation</a>                                | <a href="#">RT</a>     |          | 4     | 2.4E-2  | 9.2E-1    |
| <input type="checkbox"/> | GOTERM_BP_ALL   | <a href="#">myofibril assembly</a>                                                  | <a href="#">RT</a>     |          | 3     | 4.0E-2  | 9.8E-1    |
| <input type="checkbox"/> | GOTERM_BP_ALL   | <a href="#">striated muscle cell development</a>                                    | <a href="#">RT</a>     |          | 3     | 4.0E-2  | 9.8E-1    |
| <input type="checkbox"/> | GOTERM_BP_ALL   | <a href="#">muscle cell development</a>                                             | <a href="#">RT</a>     |          | 3     | 4.4E-2  | 9.9E-1    |
| <input type="checkbox"/> | GOTERM_BP_ALL   | <a href="#">actomyosin structure organization and biogenesis</a>                    | <a href="#">RT</a>     |          | 3     | 6.2E-2  | 1.0E0     |
| <input type="checkbox"/> | GOTERM_BP_ALL   | <a href="#">protein complex assembly</a>                                            | <a href="#">RT</a>     |          | 4     | 5.8E-1  | 1.0E0     |
| <input type="checkbox"/> | GOTERM_BP_ALL   | <a href="#">macromolecular complex assembly</a>                                     | <a href="#">RT</a>     |          | 7     | 5.8E-1  | 1.0E0     |
| <input type="checkbox"/> | GOTERM_BP_ALL   | <a href="#">cellular component assembly</a>                                         | <a href="#">RT</a>     |          | 8     | 5.9E-1  | 1.0E0     |
| <input type="checkbox"/> | GOTERM_BP_ALL   | <a href="#">actin cytoskeleton organization and biogenesis</a>                      | <a href="#">RT</a>     |          | 4     | 6.7E-1  | 1.0E0     |
| <input type="checkbox"/> | GOTERM_BP_ALL   | <a href="#">actin filament-based process</a>                                        | <a href="#">RT</a>     |          | 4     | 7.1E-1  | 1.0E0     |
| <input type="checkbox"/> | GOTERM_MF_ALL   | <a href="#">actin binding</a>                                                       | <a href="#">RT</a>     |          | 4     | 8.5E-1  | 1.0E0     |
| <input type="checkbox"/> | GOTERM_BP_ALL   | <a href="#">cytoskeleton organization and biogenesis</a>                            | <a href="#">RT</a>     |          | 7     | 8.8E-1  | 1.0E0     |
| <input type="checkbox"/> | GOTERM_MF_ALL   | <a href="#">cytoskeletal protein binding</a>                                        | <a href="#">RT</a>     |          | 4     | 9.7E-1  | 1.0E0     |
|                          |                 | Annotation Cluster 5                                                                | Enrichment Score: 1.86 | <b>G</b> |       |         |           |
| <input type="checkbox"/> | INTERPRO        | <a href="#">LisH dimerisation motif</a>                                             | <a href="#">RT</a>     |          | 4     | 1.1E-2  | 1.0E0     |
| <input type="checkbox"/> | UP_SEQ_FEATURE  | domain:LisH                                                                         | <a href="#">RT</a>     |          | 3     | 1.5E-2  | 1.0E0     |
| <input type="checkbox"/> | SMART           | <a href="#">LisH</a>                                                                | <a href="#">RT</a>     |          | 4     | 1.6E-2  | 9.9E-1    |
|                          |                 | Annotation Cluster 6                                                                | Enrichment Score: 1.66 | <b>G</b> |       |         |           |
| <input type="checkbox"/> | INTERPRO        | <a href="#">Zinc finger, C2H2-type</a>                                              | <a href="#">RT</a>     |          | 19    | 1.4E-3  | 7.9E-1    |
| <input type="checkbox"/> | INTERPRO        | <a href="#">Zinc finger, C2H2-like</a>                                              | <a href="#">RT</a>     |          | 12    | 4.9E-2  | 1.0E0     |
| <input type="checkbox"/> | SMART           | <a href="#">ZnF_C2H2</a>                                                            | <a href="#">RT</a>     |          | 14    | 5.3E-2  | 1.0E0     |
| <input type="checkbox"/> | INTERPRO        | <a href="#">Zinc finger, C2H2-type/integrase, DNA-binding</a>                       | <a href="#">RT</a>     |          | 10    | 6.6E-2  | 1.0E0     |
|                          |                 | Annotation Cluster 7                                                                | Enrichment Score: 1.6  | <b>G</b> |       |         |           |
| <input type="checkbox"/> | PIR_SUPERFAMILY | PIRSF018476:nuclear factor 1                                                        | <a href="#">RT</a>     |          | 3     | 1.5E-3  | 9.9E-1    |
| <input type="checkbox"/> | INTERPRO        | <a href="#">CTF/NF-I</a>                                                            | <a href="#">RT</a>     |          | 3     | 2.8E-3  | 9.3E-1    |
| <input type="checkbox"/> | INTERPRO        | <a href="#">MAD homology 1, Dwarfin-type</a>                                        | <a href="#">RT</a>     |          | 3     | 2.0E-2  | 1.0E0     |
| <input type="checkbox"/> | SMART           | <a href="#">DWA</a>                                                                 | <a href="#">RT</a>     |          | 3     | 2.7E-2  | 9.8E-1    |
| <input type="checkbox"/> | GOTERM_BP_ALL   | <a href="#">DNA replication</a>                                                     | <a href="#">RT</a>     |          | 5     | 2.9E-1  | 1.0E0     |
| <input type="checkbox"/> | SP_PIR_KEYWORDS | <a href="#">dna replication</a>                                                     | <a href="#">RT</a>     |          | 3     | 3.6E-1  | 1.0E0     |
|                          |                 | Annotation Cluster 8                                                                | Enrichment Score: 1.5  | <b>G</b> |       |         |           |
| <input type="checkbox"/> | SMART           | <a href="#">UBA</a>                                                                 | <a href="#">RT</a>     |          | 4     | 1.8E-2  | 9.7E-1    |
| <input type="checkbox"/> | INTERPRO        | <a href="#">Ubiquitin-associated/translation elongation factor EF1B, N-terminal</a> | <a href="#">RT</a>     |          | 4     | 4.1E-2  | 1.0E0     |
| <input type="checkbox"/> | UP_SEQ_FEATURE  | domain:UBA                                                                          | <a href="#">RT</a>     |          | 3     | 4.3E-2  | 1.0E0     |
|                          |                 | Annotation Cluster 9                                                                | Enrichment Score: 1.19 | <b>G</b> |       |         |           |

|                          |                 |                                                                                                              |          |  |       |         |           |
|--------------------------|-----------------|--------------------------------------------------------------------------------------------------------------|----------|--|-------|---------|-----------|
| <input type="checkbox"/> | GOTERM_BP_ALL   | <a href="#">negative regulation of transcription, DNA-dependent</a>                                          | RT       |  | 10    | 1.4E-2  | 8.1E-1    |
| <input type="checkbox"/> | GOTERM_BP_ALL   | <a href="#">negative regulation of transcription from RNA polymerase II promoter</a>                         | RT       |  | 8     | 1.8E-2  | 8.7E-1    |
| <input type="checkbox"/> | UP_SEQ_FEATURE  | mutagenesis site                                                                                             | RT       |  | 13    | 2.0E-2  | 1.0E0     |
| <input type="checkbox"/> | GOTERM_MF_ALL   | <a href="#">transcription corepressor activity</a>                                                           | RT       |  | 5     | 2.4E-2  | 9.8E-1    |
| <input type="checkbox"/> | GOTERM_MF_ALL   | <a href="#">transcription factor binding</a>                                                                 | RT       |  | 10    | 2.7E-2  | 9.9E-1    |
| <input type="checkbox"/> | GOTERM_BP_ALL   | <a href="#">negative regulation of transcription</a>                                                         | RT       |  | 11    | 3.1E-2  | 9.6E-1    |
| <input type="checkbox"/> | GOTERM_BP_ALL   | <a href="#">negative regulation of nucleobase, nucleoside, nucleotide and nucleic acid metabolic process</a> | RT       |  | 11    | 4.5E-2  | 9.9E-1    |
| <input type="checkbox"/> | GOTERM_BP_ALL   | <a href="#">transcription from RNA polymerase II promoter</a>                                                | RT       |  | 14    | 7.9E-2  | 1.0E0     |
| <input type="checkbox"/> | GOTERM_MF_ALL   | <a href="#">transcription repressor activity</a>                                                             | RT       |  | 7     | 8.5E-2  | 1.0E0     |
| <input type="checkbox"/> | GOTERM_BP_ALL   | <a href="#">negative regulation of cellular metabolic process</a>                                            | RT       |  | 11    | 1.0E-1  | 1.0E0     |
| <input type="checkbox"/> | GOTERM_BP_ALL   | <a href="#">regulation of transcription from RNA polymerase II promoter</a>                                  | RT       |  | 12    | 1.3E-1  | 1.0E0     |
| <input type="checkbox"/> | GOTERM_MF_ALL   | <a href="#">transcription cofactor activity</a>                                                              | RT       |  | 6     | 1.4E-1  | 1.0E0     |
| <input type="checkbox"/> | GOTERM_BP_ALL   | <a href="#">negative regulation of metabolic process</a>                                                     | RT       |  | 11    | 1.8E-1  | 1.0E0     |
| <input type="checkbox"/> | GOTERM_BP_ALL   | <a href="#">negative regulation of cellular process</a>                                                      | RT       |  | 20    | 3.6E-1  | 1.0E0     |
| <input type="checkbox"/> | GOTERM_BP_ALL   | <a href="#">negative regulation of biological process</a>                                                    | RT       |  | 21    | 3.9E-1  | 1.0E0     |
| Annotation Cluster 10    |                 | Enrichment Score: 1.15                                                                                       | <b>G</b> |  | Count | P_Value | Benjamini |
| <input type="checkbox"/> | SP_PIR_KEYWORDS | <a href="#">rna-binding</a>                                                                                  | RT       |  | 13    | 3.4E-2  | 8.1E-1    |
| <input type="checkbox"/> | INTERPRO        | <a href="#">Nucleotide-binding, alpha-beta plait</a>                                                         | RT       |  | 7     | 5.5E-2  | 1.0E0     |
| <input type="checkbox"/> | INTERPRO        | <a href="#">RNA recognition motif, RNP-1</a>                                                                 | RT       |  | 7     | 5.6E-2  | 1.0E0     |
| <input type="checkbox"/> | SMART           | <a href="#">RRM</a>                                                                                          | RT       |  | 8     | 7.8E-2  | 1.0E0     |
| <input type="checkbox"/> | GOTERM_MF_ALL   | <a href="#">RNA binding</a>                                                                                  | RT       |  | 14    | 2.3E-1  | 1.0E0     |
| Annotation Cluster 11    |                 | Enrichment Score: 1.05                                                                                       | <b>G</b> |  | Count | P_Value | Benjamini |
| <input type="checkbox"/> | GOTERM_BP_ALL   | <a href="#">germ cell development</a>                                                                        | RT       |  | 4     | 3.1E-2  | 9.6E-1    |
| <input type="checkbox"/> | GOTERM_BP_ALL   | <a href="#">gamete generation</a>                                                                            | RT       |  | 10    | 4.0E-2  | 9.8E-1    |
| <input type="checkbox"/> | GOTERM_BP_ALL   | <a href="#">reproduction</a>                                                                                 | RT       |  | 14    | 6.4E-2  | 1.0E0     |
| <input type="checkbox"/> | GOTERM_BP_ALL   | <a href="#">sexual reproduction</a>                                                                          | RT       |  | 10    | 9.8E-2  | 1.0E0     |
| <input type="checkbox"/> | GOTERM_BP_ALL   | <a href="#">spermatogenesis</a>                                                                              | RT       |  | 6     | 2.5E-1  | 1.0E0     |
| <input type="checkbox"/> | GOTERM_BP_ALL   | <a href="#">male gamete generation</a>                                                                       | RT       |  | 6     | 2.5E-1  | 1.0E0     |
| Annotation Cluster 12    |                 | Enrichment Score: 1.03                                                                                       | <b>G</b> |  | Count | P_Value | Benjamini |
| <input type="checkbox"/> | INTERPRO        | <a href="#">BTB/POZ</a>                                                                                      | RT       |  | 6     | 2.6E-2  | 1.0E0     |
| <input type="checkbox"/> | INTERPRO        | <a href="#">BTB/POZ-like</a>                                                                                 | RT       |  | 6     | 8.9E-2  | 1.0E0     |
| <input type="checkbox"/> | INTERPRO        | <a href="#">BTB/POZ fold</a>                                                                                 | RT       |  | 6     | 9.1E-2  | 1.0E0     |
| <input type="checkbox"/> | SMART           | <a href="#">BTB</a>                                                                                          | RT       |  | 6     | 1.7E-1  | 1.0E0     |
| <input type="checkbox"/> | UP_SEQ_FEATURE  | domain:BTB                                                                                                   | RT       |  | 3     | 1.9E-1  | 1.0E0     |
| Annotation Cluster 13    |                 | Enrichment Score: 1.03                                                                                       | <b>G</b> |  | Count | P_Value | Benjamini |
| <input type="checkbox"/> | GOTERM_BP_ALL   | <a href="#">chromatin modification</a>                                                                       | RT       |  | 9     | 1.5E-2  | 8.3E-1    |
| <input type="checkbox"/> | SP_PIR_KEYWORDS | <a href="#">Chromatin regulator</a>                                                                          | RT       |  | 6     | 3.1E-2  | 8.2E-1    |
| <input type="checkbox"/> | GOTERM_BP_ALL   | <a href="#">establishment and/or maintenance of chromatin architecture</a>                                   | RT       |  | 9     | 7.2E-2  | 1.0E0     |
| <input type="checkbox"/> | GOTERM_BP_ALL   | <a href="#">DNA packaging</a>                                                                                | RT       |  | 9     | 8.2E-2  | 1.0E0     |
| <input type="checkbox"/> | GOTERM_BP_ALL   | <a href="#">DNA metabolic process</a>                                                                        | RT       |  | 16    | 1.4E-1  | 1.0E0     |
| <input type="checkbox"/> | GOTERM_BP_ALL   | <a href="#">chromosome organization and biogenesis</a>                                                       | RT       |  | 9     | 2.2E-1  | 1.0E0     |
| <input type="checkbox"/> | GOTERM_BP_ALL   | <a href="#">organelle organization and biogenesis</a>                                                        | RT       |  | 18    | 7.7E-1  | 1.0E0     |
| Annotation Cluster 14    |                 | Enrichment Score: 0.85                                                                                       | <b>G</b> |  | Count | P_Value | Benjamini |
| <input type="checkbox"/> | GOTERM_MF_ALL   | <a href="#">steroid binding</a>                                                                              | RT       |  | 4     | 8.0E-2  | 1.0E0     |
| <input type="checkbox"/> | GOTERM_MF_ALL   | <a href="#">steroid hormone receptor activity</a>                                                            | RT       |  | 4     | 1.0E-1  | 1.0E0     |
| <input type="checkbox"/> | GOTERM_MF_ALL   | <a href="#">ligand-dependent nuclear receptor activity</a>                                                   | RT       |  | 4     | 1.1E-1  | 1.0E0     |
| <input type="checkbox"/> | INTERPRO        | <a href="#">Nuclear hormone receptor, ligand-</a>                                                            | RT       |  | 2     | 1.0E-1  | 1.0E0     |

| <input type="checkbox"/> |                       | <a href="#">binding_core</a>                                          | <a href="#">RT</a> |  |  |  |  |       |               |           |
|--------------------------|-----------------------|-----------------------------------------------------------------------|--------------------|--|--|--|--|-------|---------------|-----------|
| <input type="checkbox"/> | INTERPRO              | <a href="#">Nuclear hormone receptor_ligand-binding</a>               | <a href="#">RT</a> |  |  |  |  | 3     | 2.0E-1 1.0E0  |           |
| <input type="checkbox"/> | SMART                 | <a href="#">HOLI</a>                                                  | <a href="#">RT</a> |  |  |  |  | 3     | 2.4E-1 1.0E0  |           |
|                          | Annotation Cluster 15 | Enrichment Score: 0.82                                                | <b>G</b>           |  |  |  |  | Count | P_Value       | Benjamini |
| <input type="checkbox"/> | INTERPRO              | <a href="#">Zinc finger_C2H2-type/integrase_DNA-binding</a>           | <a href="#">RT</a> |  |  |  |  | 10    | 6.6E-2 1.0E0  |           |
| <input type="checkbox"/> | INTERPRO              | <a href="#">Zinc finger_C2H2-subtype</a>                              | <a href="#">RT</a> |  |  |  |  | 7     | 1.2E-1 1.0E0  |           |
| <input type="checkbox"/> | SMART                 | <a href="#">KRAB</a>                                                  | <a href="#">RT</a> |  |  |  |  | 7     | 2.5E-1 1.0E0  |           |
| <input type="checkbox"/> | INTERPRO              | <a href="#">KRAB_box</a>                                              | <a href="#">RT</a> |  |  |  |  | 6     | 2.7E-1 1.0E0  |           |
|                          | Annotation Cluster 16 | Enrichment Score: 0.82                                                | <b>G</b>           |  |  |  |  | Count | P_Value       | Benjamini |
| <input type="checkbox"/> | GOTERM_BP_ALL         | <a href="#">in utero embryonic development</a>                        | <a href="#">RT</a> |  |  |  |  | 7     | 2.4E-2 9.3E-1 |           |
| <input type="checkbox"/> | GOTERM_BP_ALL         | <a href="#">sex differentiation</a>                                   | <a href="#">RT</a> |  |  |  |  | 5     | 8.3E-2 1.0E0  |           |
| <input type="checkbox"/> | GOTERM_BP_ALL         | <a href="#">chordate embryonic development</a>                        | <a href="#">RT</a> |  |  |  |  | 8     | 9.7E-2 1.0E0  |           |
| <input type="checkbox"/> | GOTERM_BP_ALL         | <a href="#">embryonic development ending in birth or egg hatching</a> | <a href="#">RT</a> |  |  |  |  | 8     | 1.0E-1 1.0E0  |           |
| <input type="checkbox"/> | GOTERM_BP_ALL         | <a href="#">reproductive developmental process</a>                    | <a href="#">RT</a> |  |  |  |  | 5     | 1.0E-1 1.0E0  |           |
| <input type="checkbox"/> | GOTERM_BP_ALL         | <a href="#">embryonic development</a>                                 | <a href="#">RT</a> |  |  |  |  | 13    | 1.0E-1 1.0E0  |           |
| <input type="checkbox"/> | GOTERM_BP_ALL         | <a href="#">development of primary sexual characteristics</a>         | <a href="#">RT</a> |  |  |  |  | 4     | 1.2E-1 1.0E0  |           |
| <input type="checkbox"/> | GOTERM_BP_ALL         | <a href="#">heart morphogenesis</a>                                   | <a href="#">RT</a> |  |  |  |  | 3     | 1.3E-1 1.0E0  |           |
| <input type="checkbox"/> | GOTERM_BP_ALL         | <a href="#">blood vessel development</a>                              | <a href="#">RT</a> |  |  |  |  | 7     | 2.5E-1 1.0E0  |           |
| <input type="checkbox"/> | GOTERM_BP_ALL         | <a href="#">vasculature development</a>                               | <a href="#">RT</a> |  |  |  |  | 7     | 2.6E-1 1.0E0  |           |
| <input type="checkbox"/> | GOTERM_BP_ALL         | <a href="#">gonad development</a>                                     | <a href="#">RT</a> |  |  |  |  | 3     | 2.9E-1 1.0E0  |           |
| <input type="checkbox"/> | GOTERM_BP_ALL         | <a href="#">reproductive structure development</a>                    | <a href="#">RT</a> |  |  |  |  | 3     | 3.1E-1 1.0E0  |           |
| <input type="checkbox"/> | UP_SEQ_FEATURE        | compositionally biased region:Poly-Ala                                | <a href="#">RT</a> |  |  |  |  | 5     | 3.2E-1 1.0E0  |           |
| <input type="checkbox"/> | GOTERM_BP_ALL         | <a href="#">reproductive process</a>                                  | <a href="#">RT</a> |  |  |  |  | 5     | 6.0E-1 1.0E0  |           |
|                          | Annotation Cluster 17 | Enrichment Score: 0.81                                                | <b>G</b>           |  |  |  |  | Count | P_Value       | Benjamini |
| <input type="checkbox"/> | GOTERM_BP_ALL         | <a href="#">negative regulation of cell differentiation</a>           | <a href="#">RT</a> |  |  |  |  | 5     | 9.3E-2 1.0E0  |           |
| <input type="checkbox"/> | GOTERM_BP_ALL         | <a href="#">negative regulation of developmental process</a>          | <a href="#">RT</a> |  |  |  |  | 5     | 1.5E-1 1.0E0  |           |
| <input type="checkbox"/> | GOTERM_BP_ALL         | <a href="#">regulation of developmental process</a>                   | <a href="#">RT</a> |  |  |  |  | 9     | 1.7E-1 1.0E0  |           |
| <input type="checkbox"/> | GOTERM_BP_ALL         | <a href="#">regulation of cell differentiation</a>                    | <a href="#">RT</a> |  |  |  |  | 6     | 2.4E-1 1.0E0  |           |
|                          | Annotation Cluster 18 | Enrichment Score: 0.79                                                | <b>G</b>           |  |  |  |  | Count | P_Value       | Benjamini |
| <input type="checkbox"/> | GOTERM_BP_ALL         | <a href="#">ubiquitin cycle</a>                                       | <a href="#">RT</a> |  |  |  |  | 14    | 8.9E-2 1.0E0  |           |
| <input type="checkbox"/> | SP_PIR_KEYWORDS       | <a href="#">Ubl conjugation pathway</a>                               | <a href="#">RT</a> |  |  |  |  | 11    | 1.2E-1 1.0E0  |           |
| <input type="checkbox"/> | SP_PIR_KEYWORDS       | <a href="#">ligase</a>                                                | <a href="#">RT</a> |  |  |  |  | 8     | 1.3E-1 1.0E0  |           |
| <input type="checkbox"/> | GOTERM_MF_ALL         | <a href="#">ligase activity</a>                                       | <a href="#">RT</a> |  |  |  |  | 9     | 2.7E-1 1.0E0  |           |
| <input type="checkbox"/> | GOTERM_BP_ALL         | <a href="#">post-translational protein modification</a>               | <a href="#">RT</a> |  |  |  |  | 28    | 3.2E-1 1.0E0  |           |
|                          | Annotation Cluster 19 | Enrichment Score: 0.76                                                | <b>G</b>           |  |  |  |  | Count | P_Value       | Benjamini |
| <input type="checkbox"/> | GOTERM_MF_ALL         | <a href="#">signal sequence binding</a>                               | <a href="#">RT</a> |  |  |  |  | 3     | 1.5E-2 9.5E-1 |           |
| <input type="checkbox"/> | GOTERM_MF_ALL         | <a href="#">peptide binding</a>                                       | <a href="#">RT</a> |  |  |  |  | 4     | 4.6E-1 1.0E0  |           |
| <input type="checkbox"/> | GOTERM_BP_ALL         | <a href="#">intracellular protein transport</a>                       | <a href="#">RT</a> |  |  |  |  | 7     | 7.9E-1 1.0E0  |           |
|                          | Annotation Cluster 20 | Enrichment Score: 0.69                                                | <b>G</b>           |  |  |  |  | Count | P_Value       | Benjamini |
| <input type="checkbox"/> | INTERPRO              | <a href="#">IQ_calmodulin-binding region</a>                          | <a href="#">RT</a> |  |  |  |  | 4     | 1.3E-1 1.0E0  |           |
| <input type="checkbox"/> | SMART                 | <a href="#">IQ</a>                                                    | <a href="#">RT</a> |  |  |  |  | 4     | 2.0E-1 1.0E0  |           |
| <input type="checkbox"/> | GOTERM_MF_ALL         | <a href="#">calmodulin binding</a>                                    | <a href="#">RT</a> |  |  |  |  | 4     | 3.3E-1 1.0E0  |           |
|                          | Annotation Cluster 21 | Enrichment Score: 0.64                                                | <b>G</b>           |  |  |  |  | Count | P_Value       | Benjamini |
| <input type="checkbox"/> | GOTERM_BP_ALL         | <a href="#">regulation of anatomical structure morphogenesis</a>      | <a href="#">RT</a> |  |  |  |  | 3     | 2.3E-1 1.0E0  |           |
| <input type="checkbox"/> | GOTERM_BP_ALL         | <a href="#">regulation of cell shape</a>                              | <a href="#">RT</a> |  |  |  |  | 3     | 2.3E-1 1.0E0  |           |
| <input type="checkbox"/> | GOTERM_BP_ALL         | <a href="#">regulation of cell morphogenesis</a>                      | <a href="#">RT</a> |  |  |  |  | 3     | 2.3E-1 1.0E0  |           |
|                          | Annotation Cluster 22 | Enrichment Score: 0.64                                                | <b>G</b>           |  |  |  |  | Count | P_Value       | Benjamini |
| <input type="checkbox"/> | GOTERM_BP_ALL         | <a href="#">ossification</a>                                          | <a href="#">RT</a> |  |  |  |  | 5     | 1.2E-1 1.0E0  |           |
| <input type="checkbox"/> | GOTERM_BP_ALL         | <a href="#">biomineral formation</a>                                  | <a href="#">RT</a> |  |  |  |  | 5     | 1.2E-1 1.0E0  |           |

| <input type="checkbox"/> | Category        | Term                                                                                                 | RT                     | Bar      | Count | P_Value | Benjamini |
|--------------------------|-----------------|------------------------------------------------------------------------------------------------------|------------------------|----------|-------|---------|-----------|
| <input type="checkbox"/> | GOTERM_BP_ALL   | <a href="#">bone remodeling</a>                                                                      | RT                     |          | 5     | 1.5E-1  | 1.0E0     |
| <input type="checkbox"/> | GOTERM_BP_ALL   | <a href="#">tissue remodeling</a>                                                                    | RT                     |          | 5     | 2.2E-1  | 1.0E0     |
| <input type="checkbox"/> | GOTERM_BP_ALL   | <a href="#">skeletal development</a>                                                                 | RT                     |          | 5     | 4.8E-1  | 1.0E0     |
| <input type="checkbox"/> | GOTERM_BP_ALL   | <a href="#">tissue development</a>                                                                   | RT                     |          | 6     | 6.4E-1  | 1.0E0     |
|                          |                 | Annotation Cluster 23                                                                                | Enrichment Score: 0.61 | <b>G</b> |       |         |           |
| <input type="checkbox"/> | UP_SEQ_FEATURE  | zinc finger region:C2H2-type 2                                                                       | RT                     |          | 5     | 1.5E-1  | 1.0E0     |
| <input type="checkbox"/> | UP_SEQ_FEATURE  | zinc finger region:C2H2-type 3                                                                       | RT                     |          | 4     | 3.1E-1  | 1.0E0     |
| <input type="checkbox"/> | UP_SEQ_FEATURE  | zinc finger region:C2H2-type 1                                                                       | RT                     |          | 4     | 3.3E-1  | 1.0E0     |
|                          |                 | Annotation Cluster 24                                                                                | Enrichment Score: 0.59 | <b>G</b> |       |         |           |
| <input type="checkbox"/> | GOTERM_BP_ALL   | <a href="#">RNA splicing</a>                                                                         | RT                     |          | 7     | 1.1E-1  | 1.0E0     |
| <input type="checkbox"/> | SP_PIR_KEYWORDS | <a href="#">mrna splicing</a>                                                                        | RT                     |          | 6     | 1.2E-1  | 9.9E-1    |
| <input type="checkbox"/> | GOTERM_BP_ALL   | <a href="#">mRNA metabolic process</a>                                                               | RT                     |          | 8     | 2.0E-1  | 1.0E0     |
| <input type="checkbox"/> | GOTERM_BP_ALL   | <a href="#">mRNA processing</a>                                                                      | RT                     |          | 7     | 2.4E-1  | 1.0E0     |
| <input type="checkbox"/> | SP_PIR_KEYWORDS | <a href="#">mrna processing</a>                                                                      | RT                     |          | 6     | 2.4E-1  | 1.0E0     |
| <input type="checkbox"/> | GOTERM_BP_ALL   | <a href="#">nuclear mRNA splicing, via spliceosome</a>                                               | RT                     |          | 3     | 2.6E-1  | 1.0E0     |
| <input type="checkbox"/> | GOTERM_BP_ALL   | <a href="#">RNA splicing, via transesterification reactions</a>                                      | RT                     |          | 3     | 2.6E-1  | 1.0E0     |
| <input type="checkbox"/> | GOTERM_BP_ALL   | <a href="#">RNA splicing, via transesterification reactions with bulged adenosine as nucleophile</a> | RT                     |          | 3     | 2.6E-1  | 1.0E0     |
| <input type="checkbox"/> | GOTERM_CC_ALL   | <a href="#">spliceosome</a>                                                                          | RT                     |          | 4     | 4.0E-1  | 1.0E0     |
| <input type="checkbox"/> | GOTERM_BP_ALL   | <a href="#">RNA processing</a>                                                                       | RT                     |          | 8     | 5.2E-1  | 1.0E0     |
| <input type="checkbox"/> | GOTERM_CC_ALL   | <a href="#">ribonucleoprotein complex</a>                                                            | RT                     |          | 8     | 6.1E-1  | 1.0E0     |
|                          |                 | Annotation Cluster 25                                                                                | Enrichment Score: 0.57 | <b>G</b> |       |         |           |
| <input type="checkbox"/> | INTERPRO        | <a href="#">HECT</a>                                                                                 | RT                     |          | 3     | 7.2E-2  | 1.0E0     |
| <input type="checkbox"/> | SMART           | <a href="#">HECTc</a>                                                                                | RT                     |          | 3     | 1.0E-1  | 1.0E0     |
| <input type="checkbox"/> | SP_PIR_KEYWORDS | <a href="#">ligase</a>                                                                               | RT                     |          | 8     | 1.3E-1  | 1.0E0     |
| <input type="checkbox"/> | GOTERM_MF_ALL   | <a href="#">ligase activity</a>                                                                      | RT                     |          | 9     | 2.7E-1  | 1.0E0     |
| <input type="checkbox"/> | GOTERM_MF_ALL   | <a href="#">ligase activity, forming carbon-nitrogen bonds</a>                                       | RT                     |          | 5     | 3.9E-1  | 1.0E0     |
| <input type="checkbox"/> | GOTERM_MF_ALL   | <a href="#">small conjugating protein ligase activity</a>                                            | RT                     |          | 4     | 3.9E-1  | 1.0E0     |
| <input type="checkbox"/> | GOTERM_MF_ALL   | <a href="#">acid-amino acid ligase activity</a>                                                      | RT                     |          | 4     | 4.7E-1  | 1.0E0     |
| <input type="checkbox"/> | GOTERM_MF_ALL   | <a href="#">ubiquitin-protein ligase activity</a>                                                    | RT                     |          | 3     | 6.4E-1  | 1.0E0     |
| <input type="checkbox"/> | GOTERM_MF_ALL   | <a href="#">small protein conjugating enzyme activity</a>                                            | RT                     |          | 3     | 6.5E-1  | 1.0E0     |
|                          |                 | Annotation Cluster 26                                                                                | Enrichment Score: 0.55 | <b>G</b> |       |         |           |
| <input type="checkbox"/> | GOTERM_BP_ALL   | <a href="#">organ development</a>                                                                    | RT                     |          | 32    | 1.2E-1  | 1.0E0     |
| <input type="checkbox"/> | GOTERM_BP_ALL   | <a href="#">cellular developmental process</a>                                                       | RT                     |          | 39    | 1.7E-1  | 1.0E0     |
| <input type="checkbox"/> | GOTERM_BP_ALL   | <a href="#">cell differentiation</a>                                                                 | RT                     |          | 39    | 1.7E-1  | 1.0E0     |
| <input type="checkbox"/> | GOTERM_BP_ALL   | <a href="#">developmental process</a>                                                                | RT                     |          | 57    | 3.1E-1  | 1.0E0     |
| <input type="checkbox"/> | GOTERM_BP_ALL   | <a href="#">system development</a>                                                                   | RT                     |          | 34    | 3.6E-1  | 1.0E0     |
| <input type="checkbox"/> | GOTERM_BP_ALL   | <a href="#">anatomical structure development</a>                                                     | RT                     |          | 39    | 3.9E-1  | 1.0E0     |
| <input type="checkbox"/> | GOTERM_BP_ALL   | <a href="#">multicellular organismal development</a>                                                 | RT                     |          | 42    | 4.3E-1  | 1.0E0     |
| <input type="checkbox"/> | GOTERM_BP_ALL   | <a href="#">multicellular organismal process</a>                                                     | RT                     |          | 51    | 6.0E-1  | 1.0E0     |
|                          |                 | Annotation Cluster 27                                                                                | Enrichment Score: 0.53 | <b>G</b> |       |         |           |
| <input type="checkbox"/> | GOTERM_BP_ALL   | <a href="#">cell proliferation</a>                                                                   | RT                     |          | 15    | 1.1E-1  | 1.0E0     |
| <input type="checkbox"/> | GOTERM_BP_ALL   | <a href="#">positive regulation of cell proliferation</a>                                            | RT                     |          | 6     | 3.2E-1  | 1.0E0     |
| <input type="checkbox"/> | GOTERM_BP_ALL   | <a href="#">regulation of cell proliferation</a>                                                     | RT                     |          | 7     | 6.8E-1  | 1.0E0     |
|                          |                 | Annotation Cluster 28                                                                                | Enrichment Score: 0.53 | <b>G</b> |       |         |           |
| <input type="checkbox"/> | SP_PIR_KEYWORDS | <a href="#">wd repeat</a>                                                                            | RT                     |          | 7     | 2.1E-1  | 1.0E0     |
| <input type="checkbox"/> | INTERPRO        | <a href="#">WD40 repeat</a>                                                                          | RT                     |          | 6     | 2.7E-1  | 1.0E0     |
| <input type="checkbox"/> | SMART           | <a href="#">WD40</a>                                                                                 | RT                     |          | 6     | 4.6E-1  | 1.0E0     |
|                          |                 | Annotation Cluster 29                                                                                | Enrichment Score: 0.47 | <b>G</b> |       |         |           |

|                          |                 |                                                                                                    |                    |  |       |         |           |
|--------------------------|-----------------|----------------------------------------------------------------------------------------------------|--------------------|--|-------|---------|-----------|
| <input type="checkbox"/> | SP_PIR_KEYWORDS | <a href="#">wd_repeat</a>                                                                          | <a href="#">RT</a> |  | 7     | 2.1E-1  | 1.0E0     |
| <input type="checkbox"/> | UP_SEQ_FEATURE  | repeat:WD 3                                                                                        | <a href="#">RT</a> |  | 4     | 3.3E-1  | 1.0E0     |
| <input type="checkbox"/> | UP_SEQ_FEATURE  | repeat:WD 1                                                                                        | <a href="#">RT</a> |  | 4     | 3.4E-1  | 1.0E0     |
| <input type="checkbox"/> | UP_SEQ_FEATURE  | repeat:WD 2                                                                                        | <a href="#">RT</a> |  | 4     | 3.4E-1  | 1.0E0     |
| <input type="checkbox"/> | UP_SEQ_FEATURE  | repeat:WD 4                                                                                        | <a href="#">RT</a> |  | 3     | 5.7E-1  | 1.0E0     |
| Annotation Cluster 30    |                 | Enrichment Score: 0.46                                                                             | <b>G</b>           |  | Count | P_Value | Benjamini |
| <input type="checkbox"/> | GOTERM_BP_ALL   | <a href="#">Ras protein signal transduction</a>                                                    | <a href="#">RT</a> |  | 8     | 5.8E-2  | 1.0E0     |
| <input type="checkbox"/> | GOTERM_BP_ALL   | <a href="#">regulation of Ras protein signal transduction</a>                                      | <a href="#">RT</a> |  | 5     | 2.4E-1  | 1.0E0     |
| <input type="checkbox"/> | GOTERM_MF_ALL   | <a href="#">small GTPase regulator activity</a>                                                    | <a href="#">RT</a> |  | 6     | 2.6E-1  | 1.0E0     |
| <input type="checkbox"/> | GOTERM_BP_ALL   | <a href="#">small GTPase mediated signal transduction</a>                                          | <a href="#">RT</a> |  | 10    | 2.8E-1  | 1.0E0     |
| <input type="checkbox"/> | GOTERM_BP_ALL   | <a href="#">regulation of small GTPase mediated signal transduction</a>                            | <a href="#">RT</a> |  | 5     | 4.0E-1  | 1.0E0     |
| <input type="checkbox"/> | GOTERM_MF_ALL   | <a href="#">GTPase regulator activity</a>                                                          | <a href="#">RT</a> |  | 7     | 5.3E-1  | 1.0E0     |
| <input type="checkbox"/> | GOTERM_BP_ALL   | <a href="#">regulation of signal transduction</a>                                                  | <a href="#">RT</a> |  | 9     | 5.3E-1  | 1.0E0     |
| <input type="checkbox"/> | GOTERM_MF_ALL   | <a href="#">guanyl-nucleotide exchange factor activity</a>                                         | <a href="#">RT</a> |  | 3     | 7.1E-1  | 1.0E0     |
| <input type="checkbox"/> | GOTERM_MF_ALL   | <a href="#">enzyme regulator activity</a>                                                          | <a href="#">RT</a> |  | 9     | 9.1E-1  | 1.0E0     |
| Annotation Cluster 31    |                 | Enrichment Score: 0.45                                                                             | <b>G</b>           |  | Count | P_Value | Benjamini |
| <input type="checkbox"/> | GOTERM_BP_ALL   | <a href="#">detection of stimulus during sensory perception</a>                                    | <a href="#">RT</a> |  | 3     | 1.6E-1  | 1.0E0     |
| <input type="checkbox"/> | GOTERM_BP_ALL   | <a href="#">detection of abiotic stimulus</a>                                                      | <a href="#">RT</a> |  | 3     | 1.9E-1  | 1.0E0     |
| <input type="checkbox"/> | GOTERM_BP_ALL   | <a href="#">detection of external stimulus</a>                                                     | <a href="#">RT</a> |  | 3     | 2.5E-1  | 1.0E0     |
| <input type="checkbox"/> | GOTERM_BP_ALL   | <a href="#">detection of stimulus</a>                                                              | <a href="#">RT</a> |  | 3     | 3.2E-1  | 1.0E0     |
| <input type="checkbox"/> | GOTERM_BP_ALL   | <a href="#">sensory perception</a>                                                                 | <a href="#">RT</a> |  | 6     | 5.8E-1  | 1.0E0     |
| <input type="checkbox"/> | GOTERM_BP_ALL   | <a href="#">response to abiotic stimulus</a>                                                       | <a href="#">RT</a> |  | 4     | 5.9E-1  | 1.0E0     |
| <input type="checkbox"/> | GOTERM_BP_ALL   | <a href="#">response to external stimulus</a>                                                      | <a href="#">RT</a> |  | 7     | 8.7E-1  | 1.0E0     |
| Annotation Cluster 32    |                 | Enrichment Score: 0.43                                                                             | <b>G</b>           |  | Count | P_Value | Benjamini |
| <input type="checkbox"/> | GOTERM_MF_ALL   | <a href="#">nucleoside-triphosphatase activity</a>                                                 | <a href="#">RT</a> |  | 13    | 2.0E-1  | 1.0E0     |
| <input type="checkbox"/> | GOTERM_MF_ALL   | <a href="#">pyrophosphatase activity</a>                                                           | <a href="#">RT</a> |  | 13    | 2.4E-1  | 1.0E0     |
| <input type="checkbox"/> | GOTERM_MF_ALL   | <a href="#">hydrolase activity, acting on acid anhydrides, in phosphorus-containing anhydrides</a> | <a href="#">RT</a> |  | 13    | 2.5E-1  | 1.0E0     |
| <input type="checkbox"/> | GOTERM_MF_ALL   | <a href="#">hydrolase activity, acting on acid anhydrides</a>                                      | <a href="#">RT</a> |  | 13    | 2.6E-1  | 1.0E0     |
| <input type="checkbox"/> | GOTERM_MF_ALL   | <a href="#">ATPase activity</a>                                                                    | <a href="#">RT</a> |  | 7     | 4.7E-1  | 1.0E0     |
| <input type="checkbox"/> | GOTERM_MF_ALL   | <a href="#">ATPase activity, coupled</a>                                                           | <a href="#">RT</a> |  | 5     | 7.0E-1  | 1.0E0     |
| <input type="checkbox"/> | GOTERM_MF_ALL   | <a href="#">hydrolase activity</a>                                                                 | <a href="#">RT</a> |  | 32    | 8.8E-1  | 1.0E0     |
| Annotation Cluster 33    |                 | Enrichment Score: 0.43                                                                             | <b>G</b>           |  | Count | P_Value | Benjamini |
| <input type="checkbox"/> | GOTERM_BP_ALL   | <a href="#">embryonic appendage morphogenesis</a>                                                  | <a href="#">RT</a> |  | 3     | 3.4E-1  | 1.0E0     |
| <input type="checkbox"/> | GOTERM_BP_ALL   | <a href="#">embryonic limb morphogenesis</a>                                                       | <a href="#">RT</a> |  | 3     | 3.4E-1  | 1.0E0     |
| <input type="checkbox"/> | GOTERM_BP_ALL   | <a href="#">limb morphogenesis</a>                                                                 | <a href="#">RT</a> |  | 3     | 3.7E-1  | 1.0E0     |
| <input type="checkbox"/> | GOTERM_BP_ALL   | <a href="#">appendage morphogenesis</a>                                                            | <a href="#">RT</a> |  | 3     | 3.7E-1  | 1.0E0     |
| <input type="checkbox"/> | GOTERM_BP_ALL   | <a href="#">appendage development</a>                                                              | <a href="#">RT</a> |  | 3     | 3.8E-1  | 1.0E0     |
| <input type="checkbox"/> | GOTERM_BP_ALL   | <a href="#">limb development</a>                                                                   | <a href="#">RT</a> |  | 3     | 3.8E-1  | 1.0E0     |
| <input type="checkbox"/> | GOTERM_BP_ALL   | <a href="#">embryonic morphogenesis</a>                                                            | <a href="#">RT</a> |  | 5     | 4.4E-1  | 1.0E0     |
| Annotation Cluster 34    |                 | Enrichment Score: 0.42                                                                             | <b>G</b>           |  | Count | P_Value | Benjamini |
| <input type="checkbox"/> | UP_SEQ_FEATURE  | repeat:ANK 5                                                                                       | <a href="#">RT</a> |  | 3     | 2.1E-1  | 1.0E0     |
| <input type="checkbox"/> | UP_SEQ_FEATURE  | repeat:ANK 4                                                                                       | <a href="#">RT</a> |  | 3     | 2.6E-1  | 1.0E0     |
| <input type="checkbox"/> | SP_PIR_KEYWORDS | <a href="#">ubl conjugation</a>                                                                    | <a href="#">RT</a> |  | 8     | 2.8E-1  | 1.0E0     |
| <input type="checkbox"/> | UP_SEQ_FEATURE  | repeat:ANK 3                                                                                       | <a href="#">RT</a> |  | 3     | 3.5E-1  | 1.0E0     |
| <input type="checkbox"/> | UP_SEQ_FEATURE  | repeat:ANK 1                                                                                       | <a href="#">RT</a> |  | 3     | 4.2E-1  | 1.0E0     |
| <input type="checkbox"/> | UP_SEQ_FEATURE  | repeat:ANK 2                                                                                       | <a href="#">RT</a> |  | 3     | 4.2E-1  | 1.0E0     |
| <input type="checkbox"/> | SP_PIR_KEYWORDS | <a href="#">ank_repeat</a>                                                                         | <a href="#">RT</a> |  | 4     | 6.3E-1  | 1.0E0     |

| <input type="checkbox"/> | SMART           | <a href="#">ANK</a>                                                             | <a href="#">RT</a> |    |  | 4                     | 7.8E-1   | 1.0E0                                                                                 |       |         |           |
|--------------------------|-----------------|---------------------------------------------------------------------------------|--------------------|-------------------------------------------------------------------------------------|-------------------------------------------------------------------------------------|-----------------------|----------|---------------------------------------------------------------------------------------|-------|---------|-----------|
| Annotation Cluster 35    |                 |                                                                                 |                    |                                                                                     |                                                                                     | Enrichment Score: 0.4 | <b>G</b> |    | Count | P_Value | Benjamini |
| <input type="checkbox"/> | GOTERM_MF_ALL   | <a href="#">nucleotide binding</a>                                              | <a href="#">RT</a> |    |                                                                                     | 43                    | 9.0E-2   | 1.0E0                                                                                 |       |         |           |
| <input type="checkbox"/> | UP_SEQ_FEATURE  | nucleotide phosphate-binding region:ATP                                         | <a href="#">RT</a> |    |                                                                                     | 15                    | 9.0E-2   | 1.0E0                                                                                 |       |         |           |
| <input type="checkbox"/> | BIOCARTA        | <a href="#">MAPKinase Signaling Pathway</a>                                     | <a href="#">RT</a> |    |                                                                                     | 4                     | 1.6E-1   | 1.0E0                                                                                 |       |         |           |
| <input type="checkbox"/> | GOTERM_BP_ALL   | <a href="#">protein modification process</a>                                    | <a href="#">RT</a> |    |                                                                                     | 34                    | 1.8E-1   | 1.0E0                                                                                 |       |         |           |
| <input type="checkbox"/> | GOTERM_MF_ALL   | <a href="#">purine ribonucleotide binding</a>                                   | <a href="#">RT</a> |    |                                                                                     | 34                    | 2.3E-1   | 1.0E0                                                                                 |       |         |           |
| <input type="checkbox"/> | GOTERM_MF_ALL   | <a href="#">ribonucleotide binding</a>                                          | <a href="#">RT</a> |    |                                                                                     | 34                    | 2.3E-1   | 1.0E0                                                                                 |       |         |           |
| <input type="checkbox"/> | GOTERM_BP_ALL   | <a href="#">biopolymer modification</a>                                         | <a href="#">RT</a> |    |                                                                                     | 34                    | 2.5E-1   | 1.0E0                                                                                 |       |         |           |
| <input type="checkbox"/> | SP_PIR_KEYWORDS | <a href="#">Serine/threonine-protein kinase</a>                                 | <a href="#">RT</a> |    |                                                                                     | 9                     | 2.6E-1   | 1.0E0                                                                                 |       |         |           |
| <input type="checkbox"/> | INTERPRO        | <a href="#">Serine/threonine protein kinase</a>                                 | <a href="#">RT</a> |    |                                                                                     | 6                     | 2.9E-1   | 1.0E0                                                                                 |       |         |           |
| <input type="checkbox"/> | UP_SEQ_FEATURE  | domain:Protein kinase                                                           | <a href="#">RT</a> |    |                                                                                     | 8                     | 3.0E-1   | 1.0E0                                                                                 |       |         |           |
| <input type="checkbox"/> | GOTERM_MF_ALL   | <a href="#">purine nucleotide binding</a>                                       | <a href="#">RT</a> |    |                                                                                     | 34                    | 3.1E-1   | 1.0E0                                                                                 |       |         |           |
| <input type="checkbox"/> | SP_PIR_KEYWORDS | <a href="#">nucleotide-binding</a>                                              | <a href="#">RT</a> |    |                                                                                     | 26                    | 3.1E-1   | 1.0E0                                                                                 |       |         |           |
| <input type="checkbox"/> | GOTERM_BP_ALL   | <a href="#">post-translational protein modification</a>                         | <a href="#">RT</a> |    |                                                                                     | 28                    | 3.2E-1   | 1.0E0                                                                                 |       |         |           |
| <input type="checkbox"/> | UP_SEQ_FEATURE  | active site:Proton acceptor                                                     | <a href="#">RT</a> |    |                                                                                     | 10                    | 3.4E-1   | 1.0E0                                                                                 |       |         |           |
| <input type="checkbox"/> | GOTERM_BP_ALL   | <a href="#">cellular protein metabolic process</a>                              | <a href="#">RT</a> |    |                                                                                     | 56                    | 3.5E-1   | 1.0E0                                                                                 |       |         |           |
| <input type="checkbox"/> | UP_SEQ_FEATURE  | binding site:ATP                                                                | <a href="#">RT</a> |    |                                                                                     | 8                     | 3.7E-1   | 1.0E0                                                                                 |       |         |           |
| <input type="checkbox"/> | GOTERM_BP_ALL   | <a href="#">protein metabolic process</a>                                       | <a href="#">RT</a> |    |                                                                                     | 58                    | 3.8E-1   | 1.0E0                                                                                 |       |         |           |
| <input type="checkbox"/> | GOTERM_MF_ALL   | <a href="#">ATP binding</a>                                                     | <a href="#">RT</a> |    |                                                                                     | 26                    | 3.9E-1   | 1.0E0                                                                                 |       |         |           |
| <input type="checkbox"/> | GOTERM_BP_ALL   | <a href="#">cellular macromolecule metabolic process</a>                        | <a href="#">RT</a> |    |                                                                                     | 56                    | 3.9E-1   | 1.0E0                                                                                 |       |         |           |
| <input type="checkbox"/> | KEGG_PATHWAY    | <a href="#">MAPK signaling pathway</a>                                          | <a href="#">RT</a> |    |                                                                                     | 5                     | 4.0E-1   | 1.0E0                                                                                 |       |         |           |
| <input type="checkbox"/> | GOTERM_MF_ALL   | <a href="#">adenyl ribonucleotide binding</a>                                   | <a href="#">RT</a> |  |                                                                                     | 26                    | 4.1E-1   | 1.0E0                                                                                 |       |         |           |
| <input type="checkbox"/> | INTERPRO        | <a href="#">Serine/threonine protein kinase, active site</a>                    | <a href="#">RT</a> |  |                                                                                     | 6                     | 4.3E-1   | 1.0E0                                                                                 |       |         |           |
| <input type="checkbox"/> | GOTERM_BP_ALL   | <a href="#">protein amino acid phosphorylation</a>                              | <a href="#">RT</a> |  |                                                                                     | 13                    | 4.4E-1   | 1.0E0                                                                                 |       |         |           |
| <input type="checkbox"/> | GOTERM_MF_ALL   | <a href="#">protein serine/threonine kinase activity</a>                        | <a href="#">RT</a> |  |                                                                                     | 10                    | 4.6E-1   | 1.0E0                                                                                 |       |         |           |
| <input type="checkbox"/> | GOTERM_MF_ALL   | <a href="#">protein kinase activity</a>                                         | <a href="#">RT</a> |  |                                                                                     | 12                    | 4.7E-1   | 1.0E0                                                                                 |       |         |           |
| <input type="checkbox"/> | GOTERM_MF_ALL   | <a href="#">protein-tyrosine kinase activity</a>                                | <a href="#">RT</a> |  |                                                                                     | 7                     | 4.8E-1   | 1.0E0                                                                                 |       |         |           |
| <input type="checkbox"/> | SP_PIR_KEYWORDS | <a href="#">atp-binding</a>                                                     | <a href="#">RT</a> |  |                                                                                     | 19                    | 4.9E-1   | 1.0E0                                                                                 |       |         |           |
| <input type="checkbox"/> | GOTERM_MF_ALL   | <a href="#">adenyl nucleotide binding</a>                                       | <a href="#">RT</a> |  |                                                                                     | 26                    | 5.1E-1   | 1.0E0                                                                                 |       |         |           |
| <input type="checkbox"/> | GOTERM_BP_ALL   | <a href="#">phosphorylation</a>                                                 | <a href="#">RT</a> |  |                                                                                     | 14                    | 5.1E-1   | 1.0E0                                                                                 |       |         |           |
| <input type="checkbox"/> | SP_PIR_KEYWORDS | <a href="#">transferase</a>                                                     | <a href="#">RT</a> |  |                                                                                     | 23                    | 5.4E-1   | 1.0E0                                                                                 |       |         |           |
| <input type="checkbox"/> | GOTERM_BP_ALL   | <a href="#">phosphate metabolic process</a>                                     | <a href="#">RT</a> |  |                                                                                     | 16                    | 5.6E-1   | 1.0E0                                                                                 |       |         |           |
| <input type="checkbox"/> | GOTERM_BP_ALL   | <a href="#">phosphorus metabolic process</a>                                    | <a href="#">RT</a> |  |                                                                                     | 16                    | 5.6E-1   | 1.0E0                                                                                 |       |         |           |
| <input type="checkbox"/> | GOTERM_MF_ALL   | <a href="#">magnesium ion binding</a>                                           | <a href="#">RT</a> |  |                                                                                     | 7                     | 6.1E-1   | 1.0E0                                                                                 |       |         |           |
| <input type="checkbox"/> | GOTERM_MF_ALL   | <a href="#">transferase activity</a>                                            | <a href="#">RT</a> |  |                                                                                     | 31                    | 6.2E-1   | 1.0E0                                                                                 |       |         |           |
| <input type="checkbox"/> | SP_PIR_KEYWORDS | <a href="#">magnesium</a>                                                       | <a href="#">RT</a> |  |                                                                                     | 6                     | 6.4E-1   | 1.0E0                                                                                 |       |         |           |
| <input type="checkbox"/> | GOTERM_MF_ALL   | <a href="#">phosphotransferase activity, alcohol group as acceptor</a>          | <a href="#">RT</a> |  |                                                                                     | 12                    | 6.8E-1   | 1.0E0                                                                                 |       |         |           |
| <input type="checkbox"/> | INTERPRO        | <a href="#">Protein kinase, core</a>                                            | <a href="#">RT</a> |  |                                                                                     | 6                     | 7.1E-1   | 1.0E0                                                                                 |       |         |           |
| <input type="checkbox"/> | SMART           | <a href="#">S_TKc</a>                                                           | <a href="#">RT</a> |  |                                                                                     | 7                     | 7.3E-1   | 1.0E0                                                                                 |       |         |           |
| <input type="checkbox"/> | GOTERM_MF_ALL   | <a href="#">transferase activity, transferring phosphorus-containing groups</a> | <a href="#">RT</a> |  |                                                                                     | 16                    | 7.8E-1   | 1.0E0                                                                                 |       |         |           |
| <input type="checkbox"/> | GOTERM_MF_ALL   | <a href="#">kinase activity</a>                                                 | <a href="#">RT</a> |  |                                                                                     | 13                    | 8.5E-1   | 1.0E0                                                                                 |       |         |           |
| <input type="checkbox"/> | SP_PIR_KEYWORDS | <a href="#">kinase</a>                                                          | <a href="#">RT</a> |  |                                                                                     | 10                    | 8.6E-1   | 1.0E0                                                                                 |       |         |           |
| <input type="checkbox"/> | GOTERM_BP_ALL   | <a href="#">protein kinase cascade</a>                                          | <a href="#">RT</a> |  |                                                                                     | 3                     | 9.6E-1   | 1.0E0                                                                                 |       |         |           |
| Annotation Cluster 36    |                 |                                                                                 |                    |                                                                                     |                                                                                     | Enrichment Score: 0.4 | <b>G</b> |  | Count | P_Value | Benjamini |
| <input type="checkbox"/> | GOTERM_BP_ALL   | <a href="#">eye development</a>                                                 | <a href="#">RT</a> |  |                                                                                     | 4                     | 2.8E-1   | 1.0E0                                                                                 |       |         |           |
| <input type="checkbox"/> | GOTERM_BP_ALL   | <a href="#">camera-type eye development</a>                                     | <a href="#">RT</a> |  |                                                                                     | 3                     | 3.6E-1   | 1.0E0                                                                                 |       |         |           |
| <input type="checkbox"/> | GOTERM_BP_ALL   | <a href="#">sensory organ development</a>                                       | <a href="#">RT</a> |  |                                                                                     | 4                     | 6.4E-1   | 1.0E0                                                                                 |       |         |           |

| Annotation Cluster 37    |                 | Enrichment Score: 0.4                                         |    | G |  | Count | P_Value | Benjamini |
|--------------------------|-----------------|---------------------------------------------------------------|----|---|--|-------|---------|-----------|
| <input type="checkbox"/> | GOTERM_MF_ALL   | <a href="#">GTPase activity</a>                               | RT |   |  | 5     | 2.6E-1  | 1.0E0     |
| <input type="checkbox"/> | SP_PIR_KEYWORDS | <a href="#">GTP-binding</a>                                   | RT |   |  | 7     | 3.3E-1  | 1.0E0     |
| <input type="checkbox"/> | GOTERM_MF_ALL   | <a href="#">GTP binding</a>                                   | RT |   |  | 8     | 3.5E-1  | 1.0E0     |
| <input type="checkbox"/> | GOTERM_MF_ALL   | <a href="#">guanyl ribonucleotide binding</a>                 | RT |   |  | 8     | 3.7E-1  | 1.0E0     |
| <input type="checkbox"/> | GOTERM_MF_ALL   | <a href="#">guanyl nucleotide binding</a>                     | RT |   |  | 8     | 3.7E-1  | 1.0E0     |
| <input type="checkbox"/> | INTERPRO        | <a href="#">Ras</a>                                           | RT |   |  | 3     | 5.9E-1  | 1.0E0     |
| <input type="checkbox"/> | INTERPRO        | <a href="#">Ras GTPase</a>                                    | RT |   |  | 3     | 7.1E-1  | 1.0E0     |
| Annotation Cluster 38    |                 | Enrichment Score: 0.39                                        |    | G |  | Count | P_Value | Benjamini |
| <input type="checkbox"/> | GOTERM_BP_ALL   | <a href="#">germ cell migration</a>                           | RT |   |  | 3     | 6.2E-3  | 5.3E-1    |
| <input type="checkbox"/> | GOTERM_BP_ALL   | <a href="#">tube morphogenesis</a>                            | RT |   |  | 7     | 5.3E-2  | 9.9E-1    |
| <input type="checkbox"/> | GOTERM_BP_ALL   | <a href="#">tube development</a>                              | RT |   |  | 8     | 7.5E-2  | 1.0E0     |
| <input type="checkbox"/> | GOTERM_BP_ALL   | <a href="#">embryonic development</a>                         | RT |   |  | 13    | 1.0E-1  | 1.0E0     |
| <input type="checkbox"/> | GOTERM_BP_ALL   | <a href="#">lymphocyte activation</a>                         | RT |   |  | 7     | 2.0E-1  | 1.0E0     |
| <input type="checkbox"/> | GOTERM_BP_ALL   | <a href="#">hemopoietic or lymphoid organ development</a>     | RT |   |  | 8     | 2.0E-1  | 1.0E0     |
| <input type="checkbox"/> | GOTERM_BP_ALL   | <a href="#">T cell activation</a>                             | RT |   |  | 5     | 2.4E-1  | 1.0E0     |
| <input type="checkbox"/> | GOTERM_BP_ALL   | <a href="#">leukocyte activation</a>                          | RT |   |  | 7     | 2.5E-1  | 1.0E0     |
| <input type="checkbox"/> | GOTERM_BP_ALL   | <a href="#">blood vessel development</a>                      | RT |   |  | 7     | 2.5E-1  | 1.0E0     |
| <input type="checkbox"/> | GOTERM_BP_ALL   | <a href="#">immune system development</a>                     | RT |   |  | 8     | 2.5E-1  | 1.0E0     |
| <input type="checkbox"/> | GOTERM_BP_ALL   | <a href="#">vasculature development</a>                       | RT |   |  | 7     | 2.6E-1  | 1.0E0     |
| <input type="checkbox"/> | GOTERM_BP_ALL   | <a href="#">hemopoiesis</a>                                   | RT |   |  | 7     | 2.7E-1  | 1.0E0     |
| <input type="checkbox"/> | GOTERM_BP_ALL   | <a href="#">leukocyte differentiation</a>                     | RT |   |  | 5     | 2.9E-1  | 1.0E0     |
| <input type="checkbox"/> | GOTERM_BP_ALL   | <a href="#">cell activation</a>                               | RT |   |  | 7     | 2.9E-1  | 1.0E0     |
| <input type="checkbox"/> | GOTERM_BP_ALL   | <a href="#">lymphocyte differentiation</a>                    | RT |   |  | 4     | 3.1E-1  | 1.0E0     |
| <input type="checkbox"/> | GOTERM_BP_ALL   | <a href="#">branching morphogenesis of a tube</a>             | RT |   |  | 3     | 3.2E-1  | 1.0E0     |
| <input type="checkbox"/> | GOTERM_BP_ALL   | <a href="#">morphogenesis of a branching structure</a>        | RT |   |  | 3     | 3.5E-1  | 1.0E0     |
| <input type="checkbox"/> | GOTERM_BP_ALL   | <a href="#">brain development</a>                             | RT |   |  | 5     | 4.5E-1  | 1.0E0     |
| <input type="checkbox"/> | GOTERM_BP_ALL   | <a href="#">blood vessel morphogenesis</a>                    | RT |   |  | 5     | 4.9E-1  | 1.0E0     |
| <input type="checkbox"/> | GOTERM_BP_ALL   | <a href="#">locomotory behavior</a>                           | RT |   |  | 5     | 5.1E-1  | 1.0E0     |
| <input type="checkbox"/> | GOTERM_BP_ALL   | <a href="#">anatomical structure formation</a>                | RT |   |  | 5     | 5.3E-1  | 1.0E0     |
| <input type="checkbox"/> | GOTERM_BP_ALL   | <a href="#">angiogenesis</a>                                  | RT |   |  | 4     | 5.4E-1  | 1.0E0     |
| <input type="checkbox"/> | GOTERM_BP_ALL   | <a href="#">pattern specification process</a>                 | RT |   |  | 5     | 6.1E-1  | 1.0E0     |
| <input type="checkbox"/> | GOTERM_BP_ALL   | <a href="#">cell migration</a>                                | RT |   |  | 6     | 6.4E-1  | 1.0E0     |
| <input type="checkbox"/> | GOTERM_BP_ALL   | <a href="#">central nervous system development</a>            | RT |   |  | 5     | 6.5E-1  | 1.0E0     |
| <input type="checkbox"/> | GOTERM_BP_ALL   | <a href="#">cell morphogenesis</a>                            | RT |   |  | 9     | 7.2E-1  | 1.0E0     |
| <input type="checkbox"/> | GOTERM_BP_ALL   | <a href="#">cellular structure morphogenesis</a>              | RT |   |  | 9     | 7.2E-1  | 1.0E0     |
| <input type="checkbox"/> | GOTERM_BP_ALL   | <a href="#">organ morphogenesis</a>                           | RT |   |  | 9     | 7.5E-1  | 1.0E0     |
| <input type="checkbox"/> | GOTERM_BP_ALL   | <a href="#">nervous system development</a>                    | RT |   |  | 11    | 7.5E-1  | 1.0E0     |
| <input type="checkbox"/> | GOTERM_BP_ALL   | <a href="#">immune system process</a>                         | RT |   |  | 12    | 7.7E-1  | 1.0E0     |
| <input type="checkbox"/> | GOTERM_BP_ALL   | <a href="#">cell motility</a>                                 | RT |   |  | 6     | 7.8E-1  | 1.0E0     |
| <input type="checkbox"/> | GOTERM_BP_ALL   | <a href="#">localization of cell</a>                          | RT |   |  | 6     | 7.8E-1  | 1.0E0     |
| <input type="checkbox"/> | KEGG_PATHWAY    | <a href="#">Cytokine-cytokine receptor interaction</a>        | RT |   |  | 3     | 8.1E-1  | 1.0E0     |
| <input type="checkbox"/> | GOTERM_BP_ALL   | <a href="#">cellular morphogenesis during differentiation</a> | RT |   |  | 3     | 8.8E-1  | 1.0E0     |
| <input type="checkbox"/> | GOTERM_BP_ALL   | <a href="#">cell projection morphogenesis</a>                 | RT |   |  | 4     | 9.0E-1  | 1.0E0     |
| <input type="checkbox"/> | GOTERM_BP_ALL   | <a href="#">cell projection organization and biogenesis</a>   | RT |   |  | 4     | 9.0E-1  | 1.0E0     |
| <input type="checkbox"/> | GOTERM_BP_ALL   | <a href="#">cell part morphogenesis</a>                       | RT |   |  | 4     | 9.0E-1  | 1.0E0     |
| <input type="checkbox"/> | GOTERM_BP_ALL   | <a href="#">anatomical structure morphogenesis</a>            | RT |   |  | 17    | 9.0E-1  | 1.0E0     |
| <input type="checkbox"/> | GOTERM_BP_ALL   | <a href="#">immune response</a>                               | RT |   |  | 6     | 9.1E-1  | 1.0E0     |

| <input type="checkbox"/> | Category              | Term                                                                                       | RT       | Bar | Count | P_Value | Benjamini |
|--------------------------|-----------------------|--------------------------------------------------------------------------------------------|----------|-----|-------|---------|-----------|
| <input type="checkbox"/> |                       | <a href="#">generation of neurons</a>                                                      | RT       |     | 4     | 9.5E-1  | 1.0E0     |
| <input type="checkbox"/> |                       | <a href="#">neurogenesis</a>                                                               | RT       |     | 4     | 9.6E-1  | 1.0E0     |
| <input type="checkbox"/> |                       | <a href="#">neuron differentiation</a>                                                     | RT       |     | 3     | 9.7E-1  | 1.0E0     |
|                          | Annotation Cluster 39 | Enrichment Score: 0.38                                                                     | <b>G</b> |     | Count | P_Value | Benjamini |
| <input type="checkbox"/> | SP_PIR_KEYWORDS       | <a href="#">thiol protease</a>                                                             | RT       |     | 4     | 2.7E-1  | 1.0E0     |
| <input type="checkbox"/> | SP_PIR_KEYWORDS       | <a href="#">protease</a>                                                                   | RT       |     | 10    | 4.1E-1  | 1.0E0     |
| <input type="checkbox"/> | GOTERM_MF_ALL         | <a href="#">cysteine-type endopeptidase activity</a>                                       | RT       |     | 3     | 5.2E-1  | 1.0E0     |
| <input type="checkbox"/> | GOTERM_MF_ALL         | <a href="#">cysteine-type peptidase activity</a>                                           | RT       |     | 4     | 5.5E-1  | 1.0E0     |
|                          | Annotation Cluster 40 | Enrichment Score: 0.37                                                                     | <b>G</b> |     | Count | P_Value | Benjamini |
| <input type="checkbox"/> | SP_PIR_KEYWORDS       | <a href="#">gtpase activation</a>                                                          | RT       |     | 4     | 1.8E-1  | 1.0E0     |
| <input type="checkbox"/> | GOTERM_MF_ALL         | <a href="#">small GTPase regulator activity</a>                                            | RT       |     | 6     | 2.6E-1  | 1.0E0     |
| <input type="checkbox"/> | GOTERM_MF_ALL         | <a href="#">Ras GTPase activator activity</a>                                              | RT       |     | 3     | 3.2E-1  | 1.0E0     |
| <input type="checkbox"/> | GOTERM_MF_ALL         | <a href="#">GTPase regulator activity</a>                                                  | RT       |     | 7     | 5.3E-1  | 1.0E0     |
| <input type="checkbox"/> | GOTERM_MF_ALL         | <a href="#">enzyme activator activity</a>                                                  | RT       |     | 5     | 5.8E-1  | 1.0E0     |
| <input type="checkbox"/> | GOTERM_MF_ALL         | <a href="#">GTPase activator activity</a>                                                  | RT       |     | 4     | 5.9E-1  | 1.0E0     |
| <input type="checkbox"/> | GOTERM_MF_ALL         | <a href="#">enzyme regulator activity</a>                                                  | RT       |     | 9     | 9.1E-1  | 1.0E0     |
|                          | Annotation Cluster 41 | Enrichment Score: 0.37                                                                     | <b>G</b> |     | Count | P_Value | Benjamini |
| <input type="checkbox"/> | GOTERM_BP_ALL         | <a href="#">ubiquitin-dependent protein catabolic process</a>                              | RT       |     | 5     | 2.4E-1  | 1.0E0     |
| <input type="checkbox"/> | GOTERM_BP_ALL         | <a href="#">modification-dependent protein catabolic process</a>                           | RT       |     | 5     | 2.5E-1  | 1.0E0     |
| <input type="checkbox"/> | GOTERM_BP_ALL         | <a href="#">modification-dependent macromolecule catabolic process</a>                     | RT       |     | 5     | 2.5E-1  | 1.0E0     |
| <input type="checkbox"/> | GOTERM_BP_ALL         | <a href="#">proteolysis involved in cellular protein catabolic process</a>                 | RT       |     | 5     | 2.7E-1  | 1.0E0     |
| <input type="checkbox"/> | GOTERM_BP_ALL         | <a href="#">cellular protein catabolic process</a>                                         | RT       |     | 5     | 2.7E-1  | 1.0E0     |
| <input type="checkbox"/> | GOTERM_BP_ALL         | <a href="#">protein catabolic process</a>                                                  | RT       |     | 6     | 2.9E-1  | 1.0E0     |
| <input type="checkbox"/> | GOTERM_BP_ALL         | <a href="#">proteolysis</a>                                                                | RT       |     | 14    | 4.9E-1  | 1.0E0     |
| <input type="checkbox"/> | GOTERM_BP_ALL         | <a href="#">biopolymer catabolic process</a>                                               | RT       |     | 6     | 5.2E-1  | 1.0E0     |
| <input type="checkbox"/> | GOTERM_BP_ALL         | <a href="#">cellular macromolecule catabolic process</a>                                   | RT       |     | 5     | 7.0E-1  | 1.0E0     |
| <input type="checkbox"/> | GOTERM_BP_ALL         | <a href="#">macromolecule catabolic process</a>                                            | RT       |     | 6     | 7.2E-1  | 1.0E0     |
| <input type="checkbox"/> | GOTERM_BP_ALL         | <a href="#">catabolic process</a>                                                          | RT       |     | 7     | 9.6E-1  | 1.0E0     |
| <input type="checkbox"/> | GOTERM_BP_ALL         | <a href="#">cellular catabolic process</a>                                                 | RT       |     | 5     | 9.7E-1  | 1.0E0     |
|                          | Annotation Cluster 42 | Enrichment Score: 0.36                                                                     | <b>G</b> |     | Count | P_Value | Benjamini |
| <input type="checkbox"/> | SP_PIR_KEYWORDS       | <a href="#">peroxisome</a>                                                                 | RT       |     | 3     | 4.0E-1  | 1.0E0     |
| <input type="checkbox"/> | GOTERM_CC_ALL         | <a href="#">microbody</a>                                                                  | RT       |     | 3     | 4.5E-1  | 1.0E0     |
| <input type="checkbox"/> | GOTERM_CC_ALL         | <a href="#">peroxisome</a>                                                                 | RT       |     | 3     | 4.5E-1  | 1.0E0     |
|                          | Annotation Cluster 43 | Enrichment Score: 0.35                                                                     | <b>G</b> |     | Count | P_Value | Benjamini |
| <input type="checkbox"/> | GOTERM_MF_ALL         | <a href="#">protein dimerization activity</a>                                              | RT       |     | 8     | 2.1E-1  | 1.0E0     |
| <input type="checkbox"/> | GOTERM_MF_ALL         | <a href="#">protein homodimerization activity</a>                                          | RT       |     | 4     | 4.7E-1  | 1.0E0     |
| <input type="checkbox"/> | GOTERM_MF_ALL         | <a href="#">identical protein binding</a>                                                  | RT       |     | 4     | 8.8E-1  | 1.0E0     |
|                          | Annotation Cluster 44 | Enrichment Score: 0.33                                                                     | <b>G</b> |     | Count | P_Value | Benjamini |
| <input type="checkbox"/> | INTERPRO              | <a href="#">Src homology-3</a>                                                             | RT       |     | 5     | 3.9E-1  | 1.0E0     |
| <input type="checkbox"/> | SP_PIR_KEYWORDS       | <a href="#">SH3 domain</a>                                                                 | RT       |     | 5     | 4.2E-1  | 1.0E0     |
| <input type="checkbox"/> | UP_SEQ_FEATURE        | domain:SH3                                                                                 | RT       |     | 3     | 5.4E-1  | 1.0E0     |
| <input type="checkbox"/> | SMART                 | <a href="#">SH3</a>                                                                        | RT       |     | 5     | 5.4E-1  | 1.0E0     |
|                          | Annotation Cluster 45 | Enrichment Score: 0.31                                                                     | <b>G</b> |     | Count | P_Value | Benjamini |
| <input type="checkbox"/> | GOTERM_BP_ALL         | <a href="#">positive regulation of cellular process</a>                                    | RT       |     | 20    | 2.7E-1  | 1.0E0     |
| <input type="checkbox"/> | GOTERM_BP_ALL         | <a href="#">positive regulation of biological process</a>                                  | RT       |     | 21    | 3.9E-1  | 1.0E0     |
| <input type="checkbox"/> | GOTERM_BP_ALL         | <a href="#">positive regulation of transcription, DNA-dependent</a>                        | RT       |     | 7     | 4.1E-1  | 1.0E0     |
| <input type="checkbox"/> | GOTERM_BP_ALL         | <a href="#">positive regulation of transcription</a>                                       | RT       |     | 8     | 4.3E-1  | 1.0E0     |
| <input type="checkbox"/> | GOTERM_BP_ALL         | <a href="#">positive regulation of nucleobase, nucleoside, nucleotide and nucleic acid</a> | RT       |     | 8     | 4.4E-1  | 1.0E0     |



| <input type="checkbox"/> | GOTERM_BP_ALL         | <a href="#">metabolic process</a>                                                    |          |  |  |  |  |       |         |           |
|--------------------------|-----------------------|--------------------------------------------------------------------------------------|----------|--|--|--|--|-------|---------|-----------|
| <input type="checkbox"/> | GOTERM_BP_ALL         | <a href="#">positive regulation of cellular metabolic process</a>                    | RT       |  |  |  |  | 9     | 5.2E-1  | 1.0E0     |
| <input type="checkbox"/> | GOTERM_BP_ALL         | <a href="#">positive regulation of metabolic process</a>                             | RT       |  |  |  |  | 9     | 5.9E-1  | 1.0E0     |
| <input type="checkbox"/> | GOTERM_BP_ALL         | <a href="#">positive regulation of transcription from RNA polymerase II promoter</a> | RT       |  |  |  |  | 4     | 7.7E-1  | 1.0E0     |
| <input type="checkbox"/> | SP_PIR_KEYWORDS       | <a href="#">DNA binding</a>                                                          | RT       |  |  |  |  | 4     | 8.1E-1  | 1.0E0     |
|                          | Annotation Cluster 46 | Enrichment Score: 0.31                                                               | <b>G</b> |  |  |  |  | Count | P_Value | Benjamini |
| <input type="checkbox"/> | GOTERM_BP_ALL         | <a href="#">glycoprotein metabolic process</a>                                       | RT       |  |  |  |  | 4     | 3.4E-1  | 1.0E0     |
| <input type="checkbox"/> | UP_SEQ_FEATURE        | topological domain:Luminal                                                           | RT       |  |  |  |  | 6     | 3.5E-1  | 1.0E0     |
| <input type="checkbox"/> | SP_PIR_KEYWORDS       | <a href="#">glycosyltransferase</a>                                                  | RT       |  |  |  |  | 5     | 3.7E-1  | 1.0E0     |
| <input type="checkbox"/> | KEGG_PATHWAY          | <a href="#">Glycan structures - biosynthesis 1</a>                                   | RT       |  |  |  |  | 3     | 3.9E-1  | 1.0E0     |
| <input type="checkbox"/> | SP_PIR_KEYWORDS       | <a href="#">golgi apparatus</a>                                                      | RT       |  |  |  |  | 9     | 4.3E-1  | 1.0E0     |
| <input type="checkbox"/> | GOTERM_BP_ALL         | <a href="#">protein amino acid glycosylation</a>                                     | RT       |  |  |  |  | 3     | 4.5E-1  | 1.0E0     |
| <input type="checkbox"/> | GOTERM_BP_ALL         | <a href="#">biopolymer glycosylation</a>                                             | RT       |  |  |  |  | 3     | 4.6E-1  | 1.0E0     |
| <input type="checkbox"/> | GOTERM_BP_ALL         | <a href="#">glycoprotein biosynthetic process</a>                                    | RT       |  |  |  |  | 3     | 5.0E-1  | 1.0E0     |
| <input type="checkbox"/> | GOTERM_CC_ALL         | <a href="#">Golgi apparatus</a>                                                      | RT       |  |  |  |  | 11    | 5.7E-1  | 1.0E0     |
| <input type="checkbox"/> | GOTERM_MF_ALL         | <a href="#">transferase activity, transferring glycosyl groups</a>                   | RT       |  |  |  |  | 5     | 5.9E-1  | 1.0E0     |
| <input type="checkbox"/> | SP_PIR_KEYWORDS       | <a href="#">signal-anchor</a>                                                        | RT       |  |  |  |  | 5     | 8.3E-1  | 1.0E0     |
| <input type="checkbox"/> | GOTERM_BP_ALL         | <a href="#">macromolecule biosynthetic process</a>                                   | RT       |  |  |  |  | 7     | 9.9E-1  | 1.0E0     |
|                          | Annotation Cluster 47 | Enrichment Score: 0.29                                                               | <b>G</b> |  |  |  |  | Count | P_Value | Benjamini |
| <input type="checkbox"/> | GOTERM_BP_ALL         | <a href="#">regulation of growth</a>                                                 | RT       |  |  |  |  | 5     | 3.8E-1  | 1.0E0     |
| <input type="checkbox"/> | GOTERM_BP_ALL         | <a href="#">regulation of cell size</a>                                              | RT       |  |  |  |  | 4     | 4.5E-1  | 1.0E0     |
| <input type="checkbox"/> | GOTERM_BP_ALL         | <a href="#">growth</a>                                                               | RT       |  |  |  |  | 6     | 5.4E-1  | 1.0E0     |
| <input type="checkbox"/> | GOTERM_BP_ALL         | <a href="#">regulation of cell growth</a>                                            | RT       |  |  |  |  | 3     | 5.6E-1  | 1.0E0     |
| <input type="checkbox"/> | GOTERM_BP_ALL         | <a href="#">cell growth</a>                                                          | RT       |  |  |  |  | 3     | 6.6E-1  | 1.0E0     |
|                          | Annotation Cluster 48 | Enrichment Score: 0.29                                                               | <b>G</b> |  |  |  |  | Count | P_Value | Benjamini |
| <input type="checkbox"/> | GOTERM_BP_ALL         | <a href="#">fatty acid metabolic process</a>                                         | RT       |  |  |  |  | 5     | 3.2E-1  | 1.0E0     |
| <input type="checkbox"/> | GOTERM_BP_ALL         | <a href="#">lipid biosynthetic process</a>                                           | RT       |  |  |  |  | 6     | 4.7E-1  | 1.0E0     |
| <input type="checkbox"/> | GOTERM_BP_ALL         | <a href="#">cellular lipid metabolic process</a>                                     | RT       |  |  |  |  | 10    | 6.4E-1  | 1.0E0     |
| <input type="checkbox"/> | GOTERM_BP_ALL         | <a href="#">lipid metabolic process</a>                                              | RT       |  |  |  |  | 11    | 7.0E-1  | 1.0E0     |
|                          | Annotation Cluster 49 | Enrichment Score: 0.25                                                               | <b>G</b> |  |  |  |  | Count | P_Value | Benjamini |
| <input type="checkbox"/> | GOTERM_CC_ALL         | <a href="#">non-membrane-bound organelle</a>                                         | RT       |  |  |  |  | 27    | 5.1E-1  | 1.0E0     |
| <input type="checkbox"/> | GOTERM_CC_ALL         | <a href="#">intracellular non-membrane-bound organelle</a>                           | RT       |  |  |  |  | 27    | 5.1E-1  | 1.0E0     |
| <input type="checkbox"/> | GOTERM_CC_ALL         | <a href="#">cytoskeleton</a>                                                         | RT       |  |  |  |  | 15    | 6.8E-1  | 1.0E0     |
|                          | Annotation Cluster 50 | Enrichment Score: 0.25                                                               | <b>G</b> |  |  |  |  | Count | P_Value | Benjamini |
| <input type="checkbox"/> | SP_PIR_KEYWORDS       | <a href="#">chemotaxis</a>                                                           | RT       |  |  |  |  | 3     | 2.6E-1  | 1.0E0     |
| <input type="checkbox"/> | GOTERM_BP_ALL         | <a href="#">behavior</a>                                                             | RT       |  |  |  |  | 7     | 5.0E-1  | 1.0E0     |
| <input type="checkbox"/> | GOTERM_BP_ALL         | <a href="#">locomotory behavior</a>                                                  | RT       |  |  |  |  | 5     | 5.1E-1  | 1.0E0     |
| <input type="checkbox"/> | GOTERM_BP_ALL         | <a href="#">chemotaxis</a>                                                           | RT       |  |  |  |  | 3     | 6.0E-1  | 1.0E0     |
| <input type="checkbox"/> | GOTERM_BP_ALL         | <a href="#">taxis</a>                                                                | RT       |  |  |  |  | 3     | 6.0E-1  | 1.0E0     |
| <input type="checkbox"/> | GOTERM_BP_ALL         | <a href="#">response to chemical stimulus</a>                                        | RT       |  |  |  |  | 6     | 8.5E-1  | 1.0E0     |
| <input type="checkbox"/> | GOTERM_BP_ALL         | <a href="#">response to external stimulus</a>                                        | RT       |  |  |  |  | 7     | 8.7E-1  | 1.0E0     |
|                          | Annotation Cluster 51 | Enrichment Score: 0.23                                                               | <b>G</b> |  |  |  |  | Count | P_Value | Benjamini |
| <input type="checkbox"/> | SP_PIR_KEYWORDS       | <a href="#">growth factor</a>                                                        | RT       |  |  |  |  | 4     | 3.7E-1  | 1.0E0     |
| <input type="checkbox"/> | GOTERM_MF_ALL         | <a href="#">growth factor activity</a>                                               | RT       |  |  |  |  | 4     | 5.6E-1  | 1.0E0     |
| <input type="checkbox"/> | GOTERM_MF_ALL         | <a href="#">receptor binding</a>                                                     | RT       |  |  |  |  | 7     | 9.7E-1  | 1.0E0     |
|                          | Annotation Cluster 52 | Enrichment Score: 0.22                                                               | <b>G</b> |  |  |  |  | Count | P_Value | Benjamini |
| <input type="checkbox"/> | GOTERM_BP_ALL         | <a href="#">membrane organization and biogenesis</a>                                 | RT       |  |  |  |  | 6     | 5.0E-1  | 1.0E0     |
| <input type="checkbox"/> | GOTERM_BP_ALL         | <a href="#">endocytosis</a>                                                          | RT       |  |  |  |  | 4     | 6.2E-1  | 1.0E0     |
| <input type="checkbox"/> | GOTERM_BP_ALL         | <a href="#">membrane invagination</a>                                                | RT       |  |  |  |  | 4     | 6.2E-1  | 1.0E0     |

| <input type="checkbox"/> |                       |                                                                |                        |  |          |  |  |  |  |       |         |           |
|--------------------------|-----------------------|----------------------------------------------------------------|------------------------|--|----------|--|--|--|--|-------|---------|-----------|
| <input type="checkbox"/> | GOTERM_BP_ALL         | <a href="#">vesicle-mediated transport</a>                     | RT                     |  |          |  |  |  |  | 8     | 6.7E-1  | 1.0E0     |
|                          | Annotation Cluster 53 |                                                                | Enrichment Score: 0.22 |  | <b>G</b> |  |  |  |  | Count | P_Value | Benjamini |
| <input type="checkbox"/> | GOTERM_BP_ALL         | <a href="#">visual perception</a>                              | RT                     |  |          |  |  |  |  | 4     | 2.8E-1  | 1.0E0     |
| <input type="checkbox"/> | GOTERM_BP_ALL         | <a href="#">sensory perception of light stimulus</a>           | RT                     |  |          |  |  |  |  | 4     | 2.9E-1  | 1.0E0     |
| <input type="checkbox"/> | GOTERM_BP_ALL         | <a href="#">sensory perception</a>                             | RT                     |  |          |  |  |  |  | 6     | 5.8E-1  | 1.0E0     |
| <input type="checkbox"/> | GOTERM_BP_ALL         | <a href="#">neurological system process</a>                    | RT                     |  |          |  |  |  |  | 9     | 7.5E-1  | 1.0E0     |
| <input type="checkbox"/> | GOTERM_BP_ALL         | <a href="#">synaptic transmission</a>                          | RT                     |  |          |  |  |  |  | 4     | 7.5E-1  | 1.0E0     |
| <input type="checkbox"/> | GOTERM_BP_ALL         | <a href="#">transmission of nerve impulse</a>                  | RT                     |  |          |  |  |  |  | 4     | 8.4E-1  | 1.0E0     |
| <input type="checkbox"/> | GOTERM_BP_ALL         | <a href="#">system process</a>                                 | RT                     |  |          |  |  |  |  | 10    | 8.7E-1  | 1.0E0     |
| <input type="checkbox"/> | GOTERM_BP_ALL         | <a href="#">cell-cell signaling</a>                            | RT                     |  |          |  |  |  |  | 4     | 9.6E-1  | 1.0E0     |
|                          | Annotation Cluster 54 |                                                                | Enrichment Score: 0.2  |  | <b>G</b> |  |  |  |  | Count | P_Value | Benjamini |
| <input type="checkbox"/> | INTERPRO              | <a href="#">Calcium-binding_EF-hand</a>                        | RT                     |  |          |  |  |  |  | 5     | 3.9E-1  | 1.0E0     |
| <input type="checkbox"/> | SMART                 | <a href="#">EFh</a>                                            | RT                     |  |          |  |  |  |  | 5     | 5.5E-1  | 1.0E0     |
| <input type="checkbox"/> | INTERPRO              | <a href="#">EF-Hand type</a>                                   | RT                     |  |          |  |  |  |  | 3     | 7.9E-1  | 1.0E0     |
| <input type="checkbox"/> | GOTERM_MF_ALL         | <a href="#">calcium ion binding</a>                            | RT                     |  |          |  |  |  |  | 10    | 9.6E-1  | 1.0E0     |
|                          | Annotation Cluster 55 |                                                                | Enrichment Score: 0.19 |  | <b>G</b> |  |  |  |  | Count | P_Value | Benjamini |
| <input type="checkbox"/> | SP_PIR_KEYWORDS       | <a href="#">protease</a>                                       | RT                     |  |          |  |  |  |  | 10    | 4.1E-1  | 1.0E0     |
| <input type="checkbox"/> | GOTERM_BP_ALL         | <a href="#">proteolysis</a>                                    | RT                     |  |          |  |  |  |  | 14    | 4.9E-1  | 1.0E0     |
| <input type="checkbox"/> | GOTERM_MF_ALL         | <a href="#">peptidase activity</a>                             | RT                     |  |          |  |  |  |  | 12    | 6.4E-1  | 1.0E0     |
| <input type="checkbox"/> | GOTERM_MF_ALL         | <a href="#">endopeptidase activity</a>                         | RT                     |  |          |  |  |  |  | 8     | 6.5E-1  | 1.0E0     |
| <input type="checkbox"/> | GOTERM_MF_ALL         | <a href="#">hydrolase activity</a>                             | RT                     |  |          |  |  |  |  | 32    | 8.8E-1  | 1.0E0     |
| <input type="checkbox"/> | SP_PIR_KEYWORDS       | <a href="#">hydrolase</a>                                      | RT                     |  |          |  |  |  |  | 16    | 9.6E-1  | 1.0E0     |
|                          | Annotation Cluster 56 |                                                                | Enrichment Score: 0.18 |  | <b>G</b> |  |  |  |  | Count | P_Value | Benjamini |
| <input type="checkbox"/> | GOTERM_CC_ALL         | <a href="#">nucleoplasm part</a>                               | RT                     |  |          |  |  |  |  | 12    | 4.3E-1  | 1.0E0     |
| <input type="checkbox"/> | GOTERM_CC_ALL         | <a href="#">nucleoplasm</a>                                    | RT                     |  |          |  |  |  |  | 12    | 5.1E-1  | 1.0E0     |
| <input type="checkbox"/> | GOTERM_CC_ALL         | <a href="#">nuclear lumen</a>                                  | RT                     |  |          |  |  |  |  | 13    | 6.5E-1  | 1.0E0     |
| <input type="checkbox"/> | GOTERM_CC_ALL         | <a href="#">transcription factor complex</a>                   | RT                     |  |          |  |  |  |  | 8     | 6.6E-1  | 1.0E0     |
| <input type="checkbox"/> | GOTERM_CC_ALL         | <a href="#">nuclear part</a>                                   | RT                     |  |          |  |  |  |  | 18    | 7.0E-1  | 1.0E0     |
| <input type="checkbox"/> | GOTERM_CC_ALL         | <a href="#">organelle lumen</a>                                | RT                     |  |          |  |  |  |  | 14    | 7.1E-1  | 1.0E0     |
| <input type="checkbox"/> | GOTERM_CC_ALL         | <a href="#">membrane-enclosed lumen</a>                        | RT                     |  |          |  |  |  |  | 14    | 7.1E-1  | 1.0E0     |
| <input type="checkbox"/> | GOTERM_CC_ALL         | <a href="#">protein complex</a>                                | RT                     |  |          |  |  |  |  | 21    | 9.8E-1  | 1.0E0     |
|                          | Annotation Cluster 57 |                                                                | Enrichment Score: 0.18 |  | <b>G</b> |  |  |  |  | Count | P_Value | Benjamini |
| <input type="checkbox"/> | GOTERM_CC_ALL         | <a href="#">synapse</a>                                        | RT                     |  |          |  |  |  |  | 6     | 4.0E-1  | 1.0E0     |
| <input type="checkbox"/> | SP_PIR_KEYWORDS       | <a href="#">synapse</a>                                        | RT                     |  |          |  |  |  |  | 4     | 5.3E-1  | 1.0E0     |
| <input type="checkbox"/> | GOTERM_CC_ALL         | <a href="#">postsynaptic membrane</a>                          | RT                     |  |          |  |  |  |  | 3     | 5.6E-1  | 1.0E0     |
| <input type="checkbox"/> | GOTERM_CC_ALL         | <a href="#">synapse part</a>                                   | RT                     |  |          |  |  |  |  | 3     | 6.2E-1  | 1.0E0     |
| <input type="checkbox"/> | GOTERM_CC_ALL         | <a href="#">cell junction</a>                                  | RT                     |  |          |  |  |  |  | 7     | 6.6E-1  | 1.0E0     |
| <input type="checkbox"/> | SP_PIR_KEYWORDS       | <a href="#">cell junction</a>                                  | RT                     |  |          |  |  |  |  | 5     | 7.1E-1  | 1.0E0     |
| <input type="checkbox"/> | GOTERM_CC_ALL         | <a href="#">plasma membrane</a>                                | RT                     |  |          |  |  |  |  | 19    | 9.9E-1  | 1.0E0     |
| <input type="checkbox"/> | GOTERM_CC_ALL         | <a href="#">plasma membrane part</a>                           | RT                     |  |          |  |  |  |  | 13    | 1.0E0   | 1.0E0     |
|                          | Annotation Cluster 58 |                                                                | Enrichment Score: 0.14 |  | <b>G</b> |  |  |  |  | Count | P_Value | Benjamini |
| <input type="checkbox"/> | INTERPRO              | <a href="#">Immunoglobulin subtype 2</a>                       | RT                     |  |          |  |  |  |  | 4     | 5.1E-1  | 1.0E0     |
| <input type="checkbox"/> | INTERPRO              | <a href="#">Immunoglobulin I-set</a>                           | RT                     |  |          |  |  |  |  | 3     | 5.6E-1  | 1.0E0     |
| <input type="checkbox"/> | SMART                 | <a href="#">IGc2</a>                                           | RT                     |  |          |  |  |  |  | 4     | 6.6E-1  | 1.0E0     |
| <input type="checkbox"/> | INTERPRO              | <a href="#">Immunoglobulin</a>                                 | RT                     |  |          |  |  |  |  | 3     | 7.8E-1  | 1.0E0     |
| <input type="checkbox"/> | INTERPRO              | <a href="#">Immunoglobulin-like fold</a>                       | RT                     |  |          |  |  |  |  | 6     | 7.9E-1  | 1.0E0     |
| <input type="checkbox"/> | SP_PIR_KEYWORDS       | <a href="#">immunoglobulin domain</a>                          | RT                     |  |          |  |  |  |  | 4     | 9.4E-1  | 1.0E0     |
| <input type="checkbox"/> | INTERPRO              | <a href="#">Immunoglobulin-like</a>                            | RT                     |  |          |  |  |  |  | 4     | 9.5E-1  | 1.0E0     |
|                          | Annotation Cluster 59 |                                                                | Enrichment Score: 0.14 |  | <b>G</b> |  |  |  |  | Count | P_Value | Benjamini |
| <input type="checkbox"/> | GOTERM_BP_ALL         | <a href="#">generation of precursor metabolites and energy</a> | RT                     |  |          |  |  |  |  | 9     | 7.1E-1  | 1.0E0     |

| <input type="checkbox"/> | Category              | Term                                                           | RT                 | Bar | Count | P_Value | Benjamini |
|--------------------------|-----------------------|----------------------------------------------------------------|--------------------|-----|-------|---------|-----------|
| <input type="checkbox"/> |                       | <a href="#">electron transport</a>                             | <a href="#">RT</a> |     | 7     | 7.3E-1  | 1.0E0     |
| <input type="checkbox"/> |                       | <a href="#">oxidoreductase activity</a>                        | <a href="#">RT</a> |     | 14    | 7.3E-1  | 1.0E0     |
|                          | Annotation Cluster 60 | Enrichment Score: 0.14                                         | <b>G</b>           |     | Count | P_Value | Benjamini |
| <input type="checkbox"/> |                       | <a href="#">ATPase activity</a>                                | <a href="#">RT</a> |     | 7     | 4.7E-1  | 1.0E0     |
| <input type="checkbox"/> |                       | <a href="#">organelle membrane</a>                             | <a href="#">RT</a> |     | 12    | 5.5E-1  | 1.0E0     |
| <input type="checkbox"/> |                       | <a href="#">mitochondrial inner membrane</a>                   | <a href="#">RT</a> |     | 5     | 6.3E-1  | 1.0E0     |
| <input type="checkbox"/> |                       | <a href="#">organelle inner membrane</a>                       | <a href="#">RT</a> |     | 5     | 6.6E-1  | 1.0E0     |
| <input type="checkbox"/> |                       | <a href="#">mitochondrial membrane</a>                         | <a href="#">RT</a> |     | 5     | 7.0E-1  | 1.0E0     |
| <input type="checkbox"/> |                       | <a href="#">mitochondrial envelope</a>                         | <a href="#">RT</a> |     | 5     | 7.6E-1  | 1.0E0     |
| <input type="checkbox"/> |                       | <a href="#">mitochondrion</a>                                  | <a href="#">RT</a> |     | 14    | 8.1E-1  | 1.0E0     |
| <input type="checkbox"/> |                       | <a href="#">mitochondrial part</a>                             | <a href="#">RT</a> |     | 5     | 8.6E-1  | 1.0E0     |
| <input type="checkbox"/> | SP_PIR_KEYWORDS       | <a href="#">Mitochondrion</a>                                  | <a href="#">RT</a> |     | 8     | 9.1E-1  | 1.0E0     |
| <input type="checkbox"/> |                       | <a href="#">organelle envelope</a>                             | <a href="#">RT</a> |     | 5     | 9.4E-1  | 1.0E0     |
| <input type="checkbox"/> |                       | <a href="#">envelope</a>                                       | <a href="#">RT</a> |     | 5     | 9.4E-1  | 1.0E0     |
|                          | Annotation Cluster 61 | Enrichment Score: 0.13                                         | <b>G</b>           |     | Count | P_Value | Benjamini |
| <input type="checkbox"/> |                       | <a href="#">Golgi membrane</a>                                 | <a href="#">RT</a> |     | 3     | 5.4E-1  | 1.0E0     |
| <input type="checkbox"/> |                       | <a href="#">Golgi apparatus part</a>                           | <a href="#">RT</a> |     | 3     | 8.0E-1  | 1.0E0     |
| <input type="checkbox"/> |                       | <a href="#">endomembrane system</a>                            | <a href="#">RT</a> |     | 5     | 9.1E-1  | 1.0E0     |
|                          | Annotation Cluster 62 | Enrichment Score: 0.13                                         | <b>G</b>           |     | Count | P_Value | Benjamini |
| <input type="checkbox"/> |                       | <a href="#">cytoskeleton-dependent intracellular transport</a> | <a href="#">RT</a> |     | 3     | 6.3E-1  | 1.0E0     |
| <input type="checkbox"/> |                       | <a href="#">microtubule cytoskeleton</a>                       | <a href="#">RT</a> |     | 6     | 6.5E-1  | 1.0E0     |
| <input type="checkbox"/> |                       | <a href="#">microtubule-based process</a>                      | <a href="#">RT</a> |     | 4     | 6.8E-1  | 1.0E0     |
| <input type="checkbox"/> |                       | <a href="#">microtubule</a>                                    | <a href="#">RT</a> |     | 3     | 8.5E-1  | 1.0E0     |
| <input type="checkbox"/> |                       | <a href="#">cytoskeletal part</a>                              | <a href="#">RT</a> |     | 7     | 9.1E-1  | 1.0E0     |
|                          | Annotation Cluster 63 | Enrichment Score: 0.11                                         | <b>G</b>           |     | Count | P_Value | Benjamini |
| <input type="checkbox"/> |                       | <a href="#">protein transporter activity</a>                   | <a href="#">RT</a> |     | 4     | 5.2E-1  | 1.0E0     |
| <input type="checkbox"/> |                       | <a href="#">protein transport</a>                              | <a href="#">RT</a> |     | 13    | 5.6E-1  | 1.0E0     |
| <input type="checkbox"/> |                       | <a href="#">macromolecule localization</a>                     | <a href="#">RT</a> |     | 15    | 6.0E-1  | 1.0E0     |
| <input type="checkbox"/> |                       | <a href="#">establishment of protein localization</a>          | <a href="#">RT</a> |     | 13    | 6.4E-1  | 1.0E0     |
| <input type="checkbox"/> |                       | <a href="#">protein localization</a>                           | <a href="#">RT</a> |     | 14    | 6.5E-1  | 1.0E0     |
| <input type="checkbox"/> | SP_PIR_KEYWORDS       | <a href="#">protein transport</a>                              | <a href="#">RT</a> |     | 7     | 6.7E-1  | 1.0E0     |
| <input type="checkbox"/> |                       | <a href="#">intracellular protein transport</a>                | <a href="#">RT</a> |     | 7     | 7.9E-1  | 1.0E0     |
| <input type="checkbox"/> |                       | <a href="#">protein targeting</a>                              | <a href="#">RT</a> |     | 4     | 8.0E-1  | 1.0E0     |
| <input type="checkbox"/> |                       | <a href="#">intracellular transport</a>                        | <a href="#">RT</a> |     | 10    | 8.6E-1  | 1.0E0     |
| <input type="checkbox"/> |                       | <a href="#">establishment of cellular localization</a>         | <a href="#">RT</a> |     | 12    | 9.0E-1  | 1.0E0     |
| <input type="checkbox"/> |                       | <a href="#">cellular localization</a>                          | <a href="#">RT</a> |     | 12    | 9.1E-1  | 1.0E0     |
| <input type="checkbox"/> | SP_PIR_KEYWORDS       | <a href="#">transport</a>                                      | <a href="#">RT</a> |     | 16    | 9.6E-1  | 1.0E0     |
| <input type="checkbox"/> |                       | <a href="#">transport</a>                                      | <a href="#">RT</a> |     | 34    | 9.8E-1  | 1.0E0     |
| <input type="checkbox"/> |                       | <a href="#">transporter activity</a>                           | <a href="#">RT</a> |     | 15    | 9.8E-1  | 1.0E0     |
| <input type="checkbox"/> |                       | <a href="#">establishment of localization</a>                  | <a href="#">RT</a> |     | 34    | 9.9E-1  | 1.0E0     |
| <input type="checkbox"/> |                       | <a href="#">localization</a>                                   | <a href="#">RT</a> |     | 38    | 9.9E-1  | 1.0E0     |
|                          | Annotation Cluster 64 | Enrichment Score: 0.1                                          | <b>G</b>           |     | Count | P_Value | Benjamini |
| <input type="checkbox"/> |                       | <a href="#">cell division</a>                                  | <a href="#">RT</a> |     | 6     | 4.4E-1  | 1.0E0     |
| <input type="checkbox"/> |                       | <a href="#">M phase</a>                                        | <a href="#">RT</a> |     | 4     | 8.2E-1  | 1.0E0     |
| <input type="checkbox"/> |                       | <a href="#">mitotic cell cycle</a>                             | <a href="#">RT</a> |     | 4     | 8.2E-1  | 1.0E0     |
| <input type="checkbox"/> |                       | <a href="#">cell cycle</a>                                     | <a href="#">RT</a> |     | 11    | 8.4E-1  | 1.0E0     |
| <input type="checkbox"/> |                       | <a href="#">mitosis</a>                                        | <a href="#">RT</a> |     | 3     | 8.4E-1  | 1.0E0     |
| <input type="checkbox"/> |                       | <a href="#">M phase of mitotic cell cycle</a>                  | <a href="#">RT</a> |     | 3     | 8.5E-1  | 1.0E0     |
| <input type="checkbox"/> |                       | <a href="#">cell cycle phase</a>                               | <a href="#">RT</a> |     | 4     | 9.0E-1  | 1.0E0     |

| <input type="checkbox"/> |                       |                                                                       |          |  |  |  |  |  |       |         |           |
|--------------------------|-----------------------|-----------------------------------------------------------------------|----------|--|--|--|--|--|-------|---------|-----------|
| <input type="checkbox"/> | GOTERM_BP_ALL         | <a href="#">cell cycle process</a>                                    | RT       |  |  |  |  |  | 8     | 9.0E-1  | 1.0E0     |
|                          | Annotation Cluster 65 | Enrichment Score: 0.1                                                 | <b>G</b> |  |  |  |  |  | Count | P_Value | Benjamini |
| <input type="checkbox"/> | GOTERM_CC_ALL         | <a href="#">nuclear part</a>                                          | RT       |  |  |  |  |  | 18    | 7.0E-1  | 1.0E0     |
| <input type="checkbox"/> | GOTERM_CC_ALL         | <a href="#">intracellular organelle part</a>                          | RT       |  |  |  |  |  | 40    | 7.7E-1  | 1.0E0     |
| <input type="checkbox"/> | GOTERM_CC_ALL         | <a href="#">organelle part</a>                                        | RT       |  |  |  |  |  | 40    | 7.8E-1  | 1.0E0     |
| <input type="checkbox"/> | GOTERM_CC_ALL         | <a href="#">macromolecular complex</a>                                | RT       |  |  |  |  |  | 29    | 9.5E-1  | 1.0E0     |
|                          | Annotation Cluster 66 | Enrichment Score: 0.1                                                 | <b>G</b> |  |  |  |  |  | Count | P_Value | Benjamini |
| <input type="checkbox"/> | SP_PIR_KEYWORDS       | <a href="#">cell cycle</a>                                            | RT       |  |  |  |  |  | 7     | 5.9E-1  | 1.0E0     |
| <input type="checkbox"/> | GOTERM_BP_ALL         | <a href="#">negative regulation of progression through cell cycle</a> | RT       |  |  |  |  |  | 3     | 7.1E-1  | 1.0E0     |
| <input type="checkbox"/> | GOTERM_BP_ALL         | <a href="#">cell cycle</a>                                            | RT       |  |  |  |  |  | 11    | 8.4E-1  | 1.0E0     |
| <input type="checkbox"/> | GOTERM_BP_ALL         | <a href="#">regulation of progression through cell cycle</a>          | RT       |  |  |  |  |  | 5     | 9.0E-1  | 1.0E0     |
| <input type="checkbox"/> | GOTERM_BP_ALL         | <a href="#">cell cycle process</a>                                    | RT       |  |  |  |  |  | 8     | 9.0E-1  | 1.0E0     |
| <input type="checkbox"/> | GOTERM_BP_ALL         | <a href="#">regulation of cell cycle</a>                              | RT       |  |  |  |  |  | 5     | 9.0E-1  | 1.0E0     |
|                          | Annotation Cluster 67 | Enrichment Score: 0.1                                                 | <b>G</b> |  |  |  |  |  | Count | P_Value | Benjamini |
| <input type="checkbox"/> | GOTERM_BP_ALL         | <a href="#">cell development</a>                                      | RT       |  |  |  |  |  | 26    | 2.7E-1  | 1.0E0     |
| <input type="checkbox"/> | GOTERM_BP_ALL         | <a href="#">negative regulation of apoptosis</a>                      | RT       |  |  |  |  |  | 3     | 8.7E-1  | 1.0E0     |
| <input type="checkbox"/> | GOTERM_BP_ALL         | <a href="#">negative regulation of programmed cell death</a>          | RT       |  |  |  |  |  | 3     | 8.7E-1  | 1.0E0     |
| <input type="checkbox"/> | GOTERM_BP_ALL         | <a href="#">regulation of apoptosis</a>                               | RT       |  |  |  |  |  | 6     | 9.2E-1  | 1.0E0     |
| <input type="checkbox"/> | GOTERM_BP_ALL         | <a href="#">regulation of programmed cell death</a>                   | RT       |  |  |  |  |  | 6     | 9.2E-1  | 1.0E0     |
| <input type="checkbox"/> | GOTERM_BP_ALL         | <a href="#">apoptosis</a>                                             | RT       |  |  |  |  |  | 9     | 9.3E-1  | 1.0E0     |
| <input type="checkbox"/> | GOTERM_BP_ALL         | <a href="#">programmed cell death</a>                                 | RT       |  |  |  |  |  | 9     | 9.3E-1  | 1.0E0     |
| <input type="checkbox"/> | GOTERM_BP_ALL         | <a href="#">death</a>                                                 | RT       |  |  |  |  |  | 9     | 9.5E-1  | 1.0E0     |
| <input type="checkbox"/> | GOTERM_BP_ALL         | <a href="#">cell death</a>                                            | RT       |  |  |  |  |  | 9     | 9.5E-1  | 1.0E0     |
|                          | Annotation Cluster 68 | Enrichment Score: 0.07                                                | <b>G</b> |  |  |  |  |  | Count | P_Value | Benjamini |
| <input type="checkbox"/> | SP_PIR_KEYWORDS       | <a href="#">Homeobox</a>                                              | RT       |  |  |  |  |  | 4     | 7.7E-1  | 1.0E0     |
| <input type="checkbox"/> | INTERPRO              | <a href="#">Homeobox</a>                                              | RT       |  |  |  |  |  | 3     | 8.5E-1  | 1.0E0     |
| <input type="checkbox"/> | SMART                 | <a href="#">HOX</a>                                                   | RT       |  |  |  |  |  | 3     | 9.3E-1  | 1.0E0     |
|                          | Annotation Cluster 69 | Enrichment Score: 0.07                                                | <b>G</b> |  |  |  |  |  | Count | P_Value | Benjamini |
| <input type="checkbox"/> | GOTERM_BP_ALL         | <a href="#">regulation of biological quality</a>                      | RT       |  |  |  |  |  | 11    | 8.2E-1  | 1.0E0     |
| <input type="checkbox"/> | GOTERM_BP_ALL         | <a href="#">cellular homeostasis</a>                                  | RT       |  |  |  |  |  | 4     | 8.3E-1  | 1.0E0     |
| <input type="checkbox"/> | GOTERM_BP_ALL         | <a href="#">homeostatic process</a>                                   | RT       |  |  |  |  |  | 5     | 9.0E-1  | 1.0E0     |
|                          | Annotation Cluster 70 | Enrichment Score: 0.06                                                | <b>G</b> |  |  |  |  |  | Count | P_Value | Benjamini |
| <input type="checkbox"/> | GOTERM_BP_ALL         | <a href="#">intracellular signaling cascade</a>                       | RT       |  |  |  |  |  | 20    | 7.2E-1  | 1.0E0     |
| <input type="checkbox"/> | GOTERM_BP_ALL         | <a href="#">cell surface receptor linked signal transduction</a>      | RT       |  |  |  |  |  | 19    | 9.1E-1  | 1.0E0     |
| <input type="checkbox"/> | GOTERM_BP_ALL         | <a href="#">signal transduction</a>                                   | RT       |  |  |  |  |  | 39    | 9.2E-1  | 1.0E0     |
| <input type="checkbox"/> | GOTERM_BP_ALL         | <a href="#">cell communication</a>                                    | RT       |  |  |  |  |  | 43    | 9.3E-1  | 1.0E0     |
|                          | Annotation Cluster 71 | Enrichment Score: 0.06                                                | <b>G</b> |  |  |  |  |  | Count | P_Value | Benjamini |
| <input type="checkbox"/> | UP_SEQ_FEATURE        | transit peptide:Mitochondrion                                         | RT       |  |  |  |  |  | 4     | 7.8E-1  | 1.0E0     |
| <input type="checkbox"/> | SP_PIR_KEYWORDS       | <a href="#">Mitochondrion</a>                                         | RT       |  |  |  |  |  | 8     | 9.1E-1  | 1.0E0     |
| <input type="checkbox"/> | SP_PIR_KEYWORDS       | <a href="#">transit peptide</a>                                       | RT       |  |  |  |  |  | 4     | 9.6E-1  | 1.0E0     |
|                          | Annotation Cluster 72 | Enrichment Score: 0.04                                                | <b>G</b> |  |  |  |  |  | Count | P_Value | Benjamini |
| <input type="checkbox"/> | GOTERM_MF_ALL         | <a href="#">structural constituent of ribosome</a>                    | RT       |  |  |  |  |  | 3     | 8.0E-1  | 1.0E0     |
| <input type="checkbox"/> | GOTERM_CC_ALL         | <a href="#">ribosome</a>                                              | RT       |  |  |  |  |  | 3     | 8.2E-1  | 1.0E0     |
| <input type="checkbox"/> | GOTERM_MF_ALL         | <a href="#">structural molecule activity</a>                          | RT       |  |  |  |  |  | 7     | 9.4E-1  | 1.0E0     |
| <input type="checkbox"/> | GOTERM_BP_ALL         | <a href="#">macromolecule biosynthetic process</a>                    | RT       |  |  |  |  |  | 7     | 9.9E-1  | 1.0E0     |
| <input type="checkbox"/> | GOTERM_BP_ALL         | <a href="#">translation</a>                                           | RT       |  |  |  |  |  | 4     | 9.9E-1  | 1.0E0     |
|                          | Annotation Cluster 73 | Enrichment Score: 0.03                                                | <b>G</b> |  |  |  |  |  | Count | P_Value | Benjamini |
| <input type="checkbox"/> | SP_PIR_KEYWORDS       | <a href="#">cell adhesion</a>                                         | RT       |  |  |  |  |  | 5     | 8.4E-1  | 1.0E0     |
| <input type="checkbox"/> | GOTERM_BP_ALL         | <a href="#">cell-cell adhesion</a>                                    | RT       |  |  |  |  |  | 3     | 9.4E-1  | 1.0E0     |

| <input type="checkbox"/> | GOTERM_BP_ALL         | <a href="#">cell adhesion</a>                                         | <a href="#">RT</a>     |          |  |  |  | 8     | 9.6E-1  | 1.0E0     |
|--------------------------|-----------------------|-----------------------------------------------------------------------|------------------------|----------|--|--|--|-------|---------|-----------|
| <input type="checkbox"/> | GOTERM_BP_ALL         | <a href="#">biological adhesion</a>                                   | <a href="#">RT</a>     |          |  |  |  | 8     | 9.6E-1  | 1.0E0     |
|                          | Annotation Cluster 74 |                                                                       | Enrichment Score: 0.02 | <b>G</b> |  |  |  | Count | P_Value | Benjamini |
| <input type="checkbox"/> | GOTERM_BP_ALL         | <a href="#">secretory pathway</a>                                     | <a href="#">RT</a>     |          |  |  |  | 3     | 9.2E-1  | 1.0E0     |
| <input type="checkbox"/> | GOTERM_BP_ALL         | <a href="#">secretion by cell</a>                                     | <a href="#">RT</a>     |          |  |  |  | 3     | 9.6E-1  | 1.0E0     |
| <input type="checkbox"/> | GOTERM_BP_ALL         | <a href="#">secretion</a>                                             | <a href="#">RT</a>     |          |  |  |  | 3     | 9.8E-1  | 1.0E0     |
|                          | Annotation Cluster 75 |                                                                       | Enrichment Score: 0.02 | <b>G</b> |  |  |  | Count | P_Value | Benjamini |
| <input type="checkbox"/> | GOTERM_MF_ALL         | <a href="#">metal ion transmembrane transporter activity</a>          | <a href="#">RT</a>     |          |  |  |  | 4     | 8.7E-1  | 1.0E0     |
| <input type="checkbox"/> | GOTERM_MF_ALL         | <a href="#">substrate-specific transporter activity</a>               | <a href="#">RT</a>     |          |  |  |  | 13    | 9.0E-1  | 1.0E0     |
| <input type="checkbox"/> | GOTERM_BP_ALL         | <a href="#">metal ion transport</a>                                   | <a href="#">RT</a>     |          |  |  |  | 5     | 9.3E-1  | 1.0E0     |
| <input type="checkbox"/> | GOTERM_BP_ALL         | <a href="#">cation transport</a>                                      | <a href="#">RT</a>     |          |  |  |  | 6     | 9.4E-1  | 1.0E0     |
| <input type="checkbox"/> | SP_PIR_KEYWORDS       | <a href="#">ion transport</a>                                         | <a href="#">RT</a>     |          |  |  |  | 5     | 9.5E-1  | 1.0E0     |
| <input type="checkbox"/> | GOTERM_MF_ALL         | <a href="#">cation transmembrane transporter activity</a>             | <a href="#">RT</a>     |          |  |  |  | 5     | 9.7E-1  | 1.0E0     |
| <input type="checkbox"/> | GOTERM_BP_ALL         | <a href="#">monovalent inorganic cation transport</a>                 | <a href="#">RT</a>     |          |  |  |  | 3     | 9.7E-1  | 1.0E0     |
| <input type="checkbox"/> | GOTERM_MF_ALL         | <a href="#">substrate-specific transmembrane transporter activity</a> | <a href="#">RT</a>     |          |  |  |  | 8     | 9.8E-1  | 1.0E0     |
| <input type="checkbox"/> | GOTERM_MF_ALL         | <a href="#">transporter activity</a>                                  | <a href="#">RT</a>     |          |  |  |  | 15    | 9.8E-1  | 1.0E0     |
| <input type="checkbox"/> | GOTERM_MF_ALL         | <a href="#">transmembrane transporter activity</a>                    | <a href="#">RT</a>     |          |  |  |  | 9     | 9.9E-1  | 1.0E0     |
| <input type="checkbox"/> | GOTERM_MF_ALL         | <a href="#">ion transmembrane transporter activity</a>                | <a href="#">RT</a>     |          |  |  |  | 6     | 9.9E-1  | 1.0E0     |
| <input type="checkbox"/> | GOTERM_BP_ALL         | <a href="#">ion transport</a>                                         | <a href="#">RT</a>     |          |  |  |  | 7     | 9.9E-1  | 1.0E0     |
|                          | Annotation Cluster 76 |                                                                       | Enrichment Score: 0.02 | <b>G</b> |  |  |  | Count | P_Value | Benjamini |
| <input type="checkbox"/> | GOTERM_BP_ALL         | <a href="#">response to DNA damage stimulus</a>                       | <a href="#">RT</a>     |          |  |  |  | 3     | 9.4E-1  | 1.0E0     |
| <input type="checkbox"/> | GOTERM_BP_ALL         | <a href="#">response to endogenous stimulus</a>                       | <a href="#">RT</a>     |          |  |  |  | 3     | 9.6E-1  | 1.0E0     |
| <input type="checkbox"/> | GOTERM_BP_ALL         | <a href="#">response to stress</a>                                    | <a href="#">RT</a>     |          |  |  |  | 8     | 9.9E-1  | 1.0E0     |
|                          | Annotation Cluster 77 |                                                                       | Enrichment Score: 0    | <b>G</b> |  |  |  | Count | P_Value | Benjamini |
| <input type="checkbox"/> | GOTERM_MF_ALL         | <a href="#">molecular transducer activity</a>                         | <a href="#">RT</a>     |          |  |  |  | 21    | 9.9E-1  | 1.0E0     |
| <input type="checkbox"/> | GOTERM_MF_ALL         | <a href="#">signal transducer activity</a>                            | <a href="#">RT</a>     |          |  |  |  | 21    | 9.9E-1  | 1.0E0     |
| <input type="checkbox"/> | GOTERM_MF_ALL         | <a href="#">receptor activity</a>                                     | <a href="#">RT</a>     |          |  |  |  | 17    | 9.9E-1  | 1.0E0     |
| <input type="checkbox"/> | SP_PIR_KEYWORDS       | <a href="#">receptor</a>                                              | <a href="#">RT</a>     |          |  |  |  | 12    | 9.9E-1  | 1.0E0     |
|                          | Annotation Cluster 78 |                                                                       | Enrichment Score: 0    | <b>G</b> |  |  |  | Count | P_Value | Benjamini |
| <input type="checkbox"/> | UP_SEQ_FEATURE        | topological domain:Cytoplasmic                                        | <a href="#">RT</a>     |          |  |  |  | 20    | 9.7E-1  | 1.0E0     |
| <input type="checkbox"/> | SP_PIR_KEYWORDS       | <a href="#">membrane</a>                                              | <a href="#">RT</a>     |          |  |  |  | 57    | 9.9E-1  | 1.0E0     |
| <input type="checkbox"/> | UP_SEQ_FEATURE        | transmembrane region                                                  | <a href="#">RT</a>     |          |  |  |  | 22    | 1.0E0   | 1.0E0     |
| <input type="checkbox"/> | SP_PIR_KEYWORDS       | <a href="#">transmembrane</a>                                         | <a href="#">RT</a>     |          |  |  |  | 37    | 1.0E0   | 1.0E0     |
| <input type="checkbox"/> | GOTERM_CC_ALL         | <a href="#">membrane</a>                                              | <a href="#">RT</a>     |          |  |  |  | 75    | 1.0E0   | 1.0E0     |
| <input type="checkbox"/> | GOTERM_CC_ALL         | <a href="#">membrane part</a>                                         | <a href="#">RT</a>     |          |  |  |  | 52    | 1.0E0   | 1.0E0     |
| <input type="checkbox"/> | GOTERM_CC_ALL         | <a href="#">integral to membrane</a>                                  | <a href="#">RT</a>     |          |  |  |  | 41    | 1.0E0   | 1.0E0     |
| <input type="checkbox"/> | GOTERM_CC_ALL         | <a href="#">intrinsic to membrane</a>                                 | <a href="#">RT</a>     |          |  |  |  | 41    | 1.0E0   | 1.0E0     |
|                          | Annotation Cluster 79 |                                                                       | Enrichment Score: 0    | <b>G</b> |  |  |  | Count | P_Value | Benjamini |
| <input type="checkbox"/> | UP_SEQ_FEATURE        | topological domain:Cytoplasmic                                        | <a href="#">RT</a>     |          |  |  |  | 20    | 9.7E-1  | 1.0E0     |
| <input type="checkbox"/> | UP_SEQ_FEATURE        | disulfide bond                                                        | <a href="#">RT</a>     |          |  |  |  | 16    | 9.9E-1  | 1.0E0     |
| <input type="checkbox"/> | UP_SEQ_FEATURE        | transmembrane region                                                  | <a href="#">RT</a>     |          |  |  |  | 22    | 1.0E0   | 1.0E0     |
| <input type="checkbox"/> | UP_SEQ_FEATURE        | topological domain:Extracellular                                      | <a href="#">RT</a>     |          |  |  |  | 10    | 1.0E0   | 1.0E0     |
| <input type="checkbox"/> | UP_SEQ_FEATURE        | signal peptide                                                        | <a href="#">RT</a>     |          |  |  |  | 17    | 1.0E0   | 1.0E0     |
| <input type="checkbox"/> | UP_SEQ_FEATURE        | glycosylation site:N-linked (GlcNAc...)                               | <a href="#">RT</a>     |          |  |  |  | 18    | 1.0E0   | 1.0E0     |
| <input type="checkbox"/> | SP_PIR_KEYWORDS       | <a href="#">signal</a>                                                | <a href="#">RT</a>     |          |  |  |  | 21    | 1.0E0   | 1.0E0     |
| <input type="checkbox"/> | SP_PIR_KEYWORDS       | <a href="#">glycoprotein</a>                                          | <a href="#">RT</a>     |          |  |  |  | 20    | 1.0E0   | 1.0E0     |
|                          | Annotation Cluster 80 |                                                                       | Enrichment Score: 0    | <b>G</b> |  |  |  | Count | P_Value | Benjamini |
| <input type="checkbox"/> | SP_PIR_KEYWORDS       | <a href="#">Secreted</a>                                              | <a href="#">RT</a>     |          |  |  |  | 10    | 1.0E0   | 1.0E0     |
| <input type="checkbox"/> | UP_SEQ_FEATURE        | signal peptide                                                        | <a href="#">RT</a>     |          |  |  |  | 17    | 1.0E0   | 1.0E0     |

|                          |                 |                                           |                    |  |    |       |       |
|--------------------------|-----------------|-------------------------------------------|--------------------|--|----|-------|-------|
| <input type="checkbox"/> | GOTERM_CC_ALL   | <a href="#">extracellular region</a>      | <a href="#">RT</a> |  | 20 | 1.0E0 | 1.0E0 |
| <input type="checkbox"/> | SP_PIR_KEYWORDS | <a href="#">signal</a>                    | <a href="#">RT</a> |  | 21 | 1.0E0 | 1.0E0 |
| <input type="checkbox"/> | GOTERM_CC_ALL   | <a href="#">extracellular space</a>       | <a href="#">RT</a> |  | 15 | 1.0E0 | 1.0E0 |
| <input type="checkbox"/> | GOTERM_CC_ALL   | <a href="#">extracellular region part</a> | <a href="#">RT</a> |  | 16 | 1.0E0 | 1.0E0 |

137 terms were not clustered.

Please cite the web site or [Genome Biology 2003; 4\(5\):P3](#) within any publication that makes use of any methods inspired by DAVID.

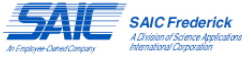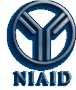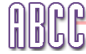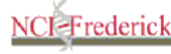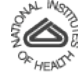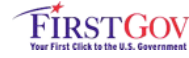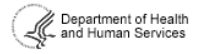

[Term of Service](#) | [Contact Us](#) | [Site Map](#)



## Functional Annotation Clustering Of Genes Downregulated <0.5 in WASP Deficient But Not In WT BMMCs

[Help and Manual](#)

Current Gene List: *wsp1 not wt1 <.5lo*

519 DAVID IDs

Options Classification Stringency Medium

Rerun using options

Create Sublist

[Download File](#)

| Annotation Cluster                                          | Enrichment Score                                                 |           |  | Count | P_Value | Benjamini |
|-------------------------------------------------------------|------------------------------------------------------------------|-----------|--|-------|---------|-----------|
| <b>Annotation Cluster 1</b> Enrichment Score: 4.49 <b>G</b> |                                                                  |           |  |       |         |           |
| <input type="checkbox"/> GOTERM_BP_ALL                      | <a href="#">response to external stimulus</a>                    | <b>RT</b> |  | 31    | 2.7E-7  | 1.4E-3    |
| <input type="checkbox"/> GOTERM_BP_ALL                      | <a href="#">taxis</a>                                            | <b>RT</b> |  | 14    | 9.2E-7  | 2.4E-3    |
| <input type="checkbox"/> GOTERM_BP_ALL                      | <a href="#">chemotaxis</a>                                       | <b>RT</b> |  | 14    | 9.2E-7  | 2.4E-3    |
| <input type="checkbox"/> GOTERM_BP_ALL                      | <a href="#">locomotory behavior</a>                              | <b>RT</b> |  | 15    | 1.7E-4  | 1.1E-1    |
| <input type="checkbox"/> GOTERM_BP_ALL                      | <a href="#">behavior</a>                                         | <b>RT</b> |  | 16    | 4.4E-3  | 4.3E-1    |
| <input type="checkbox"/> GOTERM_BP_ALL                      | <a href="#">response to chemical stimulus</a>                    | <b>RT</b> |  | 18    | 7.0E-3  | 5.3E-1    |
| <b>Annotation Cluster 2</b> Enrichment Score: 4.27 <b>G</b> |                                                                  |           |  |       |         |           |
| <input type="checkbox"/> GOTERM_BP_ALL                      | <a href="#">response to external stimulus</a>                    | <b>RT</b> |  | 31    | 2.7E-7  | 1.4E-3    |
| <input type="checkbox"/> GOTERM_BP_ALL                      | <a href="#">defense response</a>                                 | <b>RT</b> |  | 25    | 7.1E-5  | 7.1E-2    |
| <input type="checkbox"/> GOTERM_BP_ALL                      | <a href="#">response to wounding</a>                             | <b>RT</b> |  | 19    | 2.2E-4  | 1.2E-1    |
| <input type="checkbox"/> GOTERM_BP_ALL                      | <a href="#">response to stress</a>                               | <b>RT</b> |  | 35    | 2.2E-4  | 1.1E-1    |
| <input type="checkbox"/> GOTERM_BP_ALL                      | <a href="#">inflammatory response</a>                            | <b>RT</b> |  | 15    | 4.9E-4  | 1.9E-1    |
| <b>Annotation Cluster 3</b> Enrichment Score: 2.32 <b>G</b> |                                                                  |           |  |       |         |           |
| <input type="checkbox"/> GOTERM_CC_ALL                      | <a href="#">extracellular space</a>                              | <b>RT</b> |  | 66    | 5.5E-4  | 3.5E-1    |
| <input type="checkbox"/> UP_SEQ_FEATURE                     | disulfide bond                                                   | <b>RT</b> |  | 55    | 1.4E-3  | 1.0E0     |
| <input type="checkbox"/> GOTERM_CC_ALL                      | <a href="#">extracellular region part</a>                        | <b>RT</b> |  | 66    | 2.2E-3  | 2.9E-1    |
| <input type="checkbox"/> SP_PIR_KEYWORDS                    | <a href="#">glycoprotein</a>                                     | <b>RT</b> |  | 82    | 3.8E-3  | 4.8E-1    |
| <input type="checkbox"/> GOTERM_CC_ALL                      | <a href="#">extracellular region</a>                             | <b>RT</b> |  | 67    | 5.7E-3  | 5.2E-1    |
| <input type="checkbox"/> UP_SEQ_FEATURE                     | signal peptide                                                   | <b>RT</b> |  | 60    | 1.6E-2  | 1.0E0     |
| <input type="checkbox"/> SP_PIR_KEYWORDS                    | <a href="#">signal</a>                                           | <b>RT</b> |  | 68    | 1.9E-2  | 7.2E-1    |
| <input type="checkbox"/> UP_SEQ_FEATURE                     | glycosylation site:N-linked (GlcNAc...)                          | <b>RT</b> |  | 64    | 2.5E-2  | 1.0E0     |
| <b>Annotation Cluster 4</b> Enrichment Score: 2.14 <b>G</b> |                                                                  |           |  |       |         |           |
| <input type="checkbox"/> SP_PIR_KEYWORDS                    | <a href="#">receptor</a>                                         | <b>RT</b> |  | 44    | 5.3E-4  | 1.1E-1    |
| <input type="checkbox"/> GOTERM_MF_ALL                      | <a href="#">receptor activity</a>                                | <b>RT</b> |  | 51    | 1.3E-3  | 6.8E-1    |
| <input type="checkbox"/> GOTERM_MF_ALL                      | <a href="#">molecular transducer activity</a>                    | <b>RT</b> |  | 56    | 3.1E-3  | 8.1E-1    |
| <input type="checkbox"/> GOTERM_MF_ALL                      | <a href="#">signal transducer activity</a>                       | <b>RT</b> |  | 56    | 3.1E-3  | 8.1E-1    |
| <input type="checkbox"/> GOTERM_BP_ALL                      | <a href="#">cell surface receptor linked signal transduction</a> | <b>RT</b> |  | 40    | 3.1E-2  | 8.3E-1    |
| <input type="checkbox"/> GOTERM_BP_ALL                      | <a href="#">signal transduction</a>                              | <b>RT</b> |  | 68    | 5.7E-2  | 9.1E-1    |
| <input type="checkbox"/> GOTERM_BP_ALL                      | <a href="#">cell communication</a>                               | <b>RT</b> |  | 72    | 9.2E-2  | 9.5E-1    |
| <b>Annotation Cluster 5</b> Enrichment Score: 2.12 <b>G</b> |                                                                  |           |  |       |         |           |
| <input type="checkbox"/> SP_PIR_KEYWORDS                    | <a href="#">heterodimer</a>                                      | <b>RT</b> |  | 8     | 5.6E-5  | 4.7E-2    |
| <input type="checkbox"/> SP_PIR_KEYWORDS                    | <a href="#">calcium binding</a>                                  | <b>RT</b> |  | 8     | 1.8E-4  | 7.3E-2    |
| <input type="checkbox"/> SP_PIR_KEYWORDS                    | <a href="#">inflammation</a>                                     | <b>RT</b> |  | 4     | 6.2E-3  | 4.9E-1    |
| <input type="checkbox"/> PIR_SUPERFAMILY                    | PIRSF002353:S-100 protein                                        | <b>RT</b> |  | 3     | 4.0E-2  | 1.0E0     |
| <input type="checkbox"/> INTERPRO                           | <a href="#">S100/CaBP-9k-type, calcium binding, subdomain</a>    | <b>RT</b> |  | 3     | 5.8E-2  | 1.0E0     |
| <input type="checkbox"/> INTERPRO                           | <a href="#">S100/CaBP-9k-type, calcium binding</a>               | <b>RT</b> |  | 3     | 7.6E-2  | 1.0E0     |
| <input type="checkbox"/> SP_PIR_KEYWORDS                    | <a href="#">EF hand</a>                                          | <b>RT</b> |  | 3     | 1.4E-1  | 9.4E-1    |
| <b>Annotation Cluster 6</b> Enrichment Score: 2 <b>G</b>    |                                                                  |           |  |       |         |           |

|                          |                 |                                                                |    |          |    |        |        |
|--------------------------|-----------------|----------------------------------------------------------------|----|----------|----|--------|--------|
| <input type="checkbox"/> | GOTERM_BP_ALL   | <a href="#">negative regulation of cell motility</a>           | RT |          | 5  | 1.9E-3 | 3.8E-1 |
| <input type="checkbox"/> | GOTERM_BP_ALL   | <a href="#">negative regulation of locomotion</a>              | RT |          | 5  | 2.2E-3 | 3.7E-1 |
| <input type="checkbox"/> | GOTERM_BP_ALL   | <a href="#">regulation of cell motility</a>                    | RT |          | 7  | 6.7E-3 | 5.2E-1 |
| <input type="checkbox"/> | GOTERM_BP_ALL   | <a href="#">regulation of locomotion</a>                       | RT |          | 7  | 8.5E-3 | 5.6E-1 |
| <input type="checkbox"/> | GOTERM_BP_ALL   | <a href="#">locomotion</a>                                     | RT |          | 7  | 1.3E-2 | 6.8E-1 |
| <input type="checkbox"/> | GOTERM_BP_ALL   | <a href="#">localization of cell</a>                           | RT |          | 16 | 1.4E-2 | 6.9E-1 |
| <input type="checkbox"/> | GOTERM_BP_ALL   | <a href="#">cell motility</a>                                  | RT |          | 16 | 1.4E-2 | 6.9E-1 |
| <input type="checkbox"/> | GOTERM_BP_ALL   | <a href="#">regulation of cell migration</a>                   | RT |          | 4  | 1.9E-1 | 9.9E-1 |
| Annotation Cluster 7     |                 | Enrichment Score: 1.88                                         |    | <b>G</b> |    |        |        |
| <input type="checkbox"/> | GOTERM_BP_ALL   | <a href="#">leukocyte chemotaxis</a>                           | RT |          | 5  | 1.6E-3 | 3.7E-1 |
| <input type="checkbox"/> | GOTERM_BP_ALL   | <a href="#">leukocyte migration</a>                            | RT |          | 5  | 7.2E-3 | 5.4E-1 |
| <input type="checkbox"/> | GOTERM_BP_ALL   | <a href="#">induction of positive chemotaxis</a>               | RT |          | 3  | 1.9E-2 | 7.4E-1 |
| <input type="checkbox"/> | GOTERM_BP_ALL   | <a href="#">positive regulation of positive chemotaxis</a>     | RT |          | 3  | 1.9E-2 | 7.4E-1 |
| <input type="checkbox"/> | GOTERM_BP_ALL   | <a href="#">regulation of positive chemotaxis</a>              | RT |          | 3  | 1.9E-2 | 7.4E-1 |
| <input type="checkbox"/> | GOTERM_BP_ALL   | <a href="#">positive regulation of chemotaxis</a>              | RT |          | 3  | 2.2E-2 | 7.8E-1 |
| <input type="checkbox"/> | GOTERM_BP_ALL   | <a href="#">regulation of chemotaxis</a>                       | RT |          | 3  | 2.2E-2 | 7.8E-1 |
| <input type="checkbox"/> | GOTERM_BP_ALL   | <a href="#">positive chemotaxis</a>                            | RT |          | 3  | 2.2E-2 | 7.8E-1 |
| Annotation Cluster 8     |                 | Enrichment Score: 1.86                                         |    | <b>G</b> |    |        |        |
| <input type="checkbox"/> | SP_PIR_KEYWORDS | <a href="#">lysosome</a>                                       | RT |          | 11 | 2.0E-4 | 5.5E-2 |
| <input type="checkbox"/> | GOTERM_CC_ALL   | <a href="#">vacuole</a>                                        | RT |          | 13 | 1.5E-3 | 4.4E-1 |
| <input type="checkbox"/> | GOTERM_CC_ALL   | <a href="#">lytic vacuole</a>                                  | RT |          | 12 | 1.8E-3 | 3.7E-1 |
| <input type="checkbox"/> | GOTERM_CC_ALL   | <a href="#">lysosome</a>                                       | RT |          | 12 | 1.8E-3 | 3.7E-1 |
| <input type="checkbox"/> | UP_SEQ_FEATURE  | propeptide:Activation peptide                                  | RT |          | 7  | 2.0E-3 | 1.0E0  |
| <input type="checkbox"/> | PIR_SUPERFAMILY | PIRSF001182:papain                                             | RT |          | 4  | 3.5E-3 | 1.0E0  |
| <input type="checkbox"/> | INTERPRO        | <a href="#">Proteinase inhibitor I29, cathepsin propeptide</a> | RT |          | 4  | 5.6E-3 | 1.0E0  |
| <input type="checkbox"/> | INTERPRO        | <a href="#">Peptidase C1A, papain C-terminal</a>               | RT |          | 4  | 1.0E-2 | 1.0E0  |
| <input type="checkbox"/> | SMART           | <a href="#">Pept C1</a>                                        | RT |          | 4  | 1.3E-2 | 9.8E-1 |
| <input type="checkbox"/> | SP_PIR_KEYWORDS | <a href="#">Zymogen</a>                                        | RT |          | 10 | 1.8E-2 | 7.4E-1 |
| <input type="checkbox"/> | INTERPRO        | <a href="#">Peptidase C1A, papain</a>                          | RT |          | 4  | 1.9E-2 | 1.0E0  |
| <input type="checkbox"/> | SP_PIR_KEYWORDS | <a href="#">thiol protease</a>                                 | RT |          | 6  | 7.8E-2 | 9.0E-1 |
| <input type="checkbox"/> | INTERPRO        | <a href="#">Peptidase, cysteine peptidase active site</a>      | RT |          | 4  | 7.9E-2 | 1.0E0  |
| <input type="checkbox"/> | KEGG_PATHWAY    | <a href="#">Antigen processing and presentation</a>            | RT |          | 5  | 1.6E-1 | 9.1E-1 |
| <input type="checkbox"/> | GOTERM_MF_ALL   | <a href="#">cysteine-type endopeptidase activity</a>           | RT |          | 5  | 1.7E-1 | 1.0E0  |
| <input type="checkbox"/> | GOTERM_MF_ALL   | <a href="#">endopeptidase activity</a>                         | RT |          | 13 | 2.5E-1 | 1.0E0  |
| <input type="checkbox"/> | GOTERM_MF_ALL   | <a href="#">cysteine-type peptidase activity</a>               | RT |          | 6  | 2.9E-1 | 1.0E0  |
| Annotation Cluster 9     |                 | Enrichment Score: 1.82                                         |    | <b>G</b> |    |        |        |
| <input type="checkbox"/> | GOTERM_BP_ALL   | <a href="#">apoptosis</a>                                      | RT |          | 28 | 1.9E-3 | 3.8E-1 |
| <input type="checkbox"/> | GOTERM_BP_ALL   | <a href="#">death</a>                                          | RT |          | 29 | 2.1E-3 | 3.9E-1 |
| <input type="checkbox"/> | GOTERM_BP_ALL   | <a href="#">cell death</a>                                     | RT |          | 29 | 2.1E-3 | 3.9E-1 |
| <input type="checkbox"/> | GOTERM_BP_ALL   | <a href="#">programmed cell death</a>                          | RT |          | 28 | 2.5E-3 | 3.7E-1 |
| <input type="checkbox"/> | GOTERM_BP_ALL   | <a href="#">regulation of apoptosis</a>                        | RT |          | 21 | 2.6E-3 | 3.7E-1 |
| <input type="checkbox"/> | GOTERM_BP_ALL   | <a href="#">regulation of programmed cell death</a>            | RT |          | 21 | 3.1E-3 | 4.0E-1 |
| <input type="checkbox"/> | GOTERM_BP_ALL   | <a href="#">cell development</a>                               | RT |          | 41 | 5.9E-3 | 5.0E-1 |
| <input type="checkbox"/> | GOTERM_BP_ALL   | <a href="#">positive regulation of cellular process</a>        | RT |          | 32 | 8.5E-3 | 5.7E-1 |
| <input type="checkbox"/> | GOTERM_BP_ALL   | <a href="#">positive regulation of apoptosis</a>               | RT |          | 11 | 1.6E-2 | 7.3E-1 |
| <input type="checkbox"/> | GOTERM_BP_ALL   | <a href="#">positive regulation of biological process</a>      | RT |          | 34 | 1.7E-2 | 7.3E-1 |
| <input type="checkbox"/> | GOTERM_BP_ALL   | <a href="#">positive regulation of programmed cell death</a>   | RT |          | 11 | 1.8E-2 | 7.3E-1 |
| <input type="checkbox"/> | GOTERM_BP_ALL   | <a href="#">induction of programmed cell death</a>             | RT |          | 9  | 2.6E-2 | 8.0E-1 |
| <input type="checkbox"/> | GOTERM_BP_ALL   | <a href="#">induction of apoptosis</a>                         | RT |          | 9  | 2.6E-2 | 8.0E-1 |



|                          |                 |                                                                   |                    |  |       |         |           |
|--------------------------|-----------------|-------------------------------------------------------------------|--------------------|--|-------|---------|-----------|
| <input type="checkbox"/> | GOTERM_BP_ALL   | <a href="#">negative regulation of apoptosis</a>                  | <a href="#">RT</a> |  | 10    | 2.7E-2  | 8.1E-1    |
| <input type="checkbox"/> | GOTERM_BP_ALL   | <a href="#">negative regulation of programmed cell death</a>      | <a href="#">RT</a> |  | 10    | 3.0E-2  | 8.3E-1    |
| <input type="checkbox"/> | SP_PIR_KEYWORDS | <a href="#">apoptosis</a>                                         | <a href="#">RT</a> |  | 11    | 5.5E-2  | 8.7E-1    |
| <input type="checkbox"/> | GOTERM_BP_ALL   | <a href="#">cellular developmental process</a>                    | <a href="#">RT</a> |  | 50    | 6.7E-2  | 9.2E-1    |
| <input type="checkbox"/> | GOTERM_BP_ALL   | <a href="#">cell differentiation</a>                              | <a href="#">RT</a> |  | 50    | 6.7E-2  | 9.2E-1    |
| <input type="checkbox"/> | GOTERM_BP_ALL   | <a href="#">positive regulation of cellular metabolic process</a> | <a href="#">RT</a> |  | 13    | 2.4E-1  | 1.0E0     |
| <input type="checkbox"/> | GOTERM_BP_ALL   | <a href="#">positive regulation of metabolic process</a>          | <a href="#">RT</a> |  | 13    | 3.2E-1  | 1.0E0     |
| Annotation Cluster 10    |                 | Enrichment Score: 1.79                                            | <b>G</b>           |  | Count | P_Value | Benjamini |
| <input type="checkbox"/> | GOTERM_BP_ALL   | <a href="#">positive regulation of defense response</a>           | <a href="#">RT</a> |  | 4     | 3.7E-3  | 4.2E-1    |
| <input type="checkbox"/> | GOTERM_BP_ALL   | <a href="#">positive regulation of inflammatory response</a>      | <a href="#">RT</a> |  | 4     | 3.7E-3  | 4.2E-1    |
| <input type="checkbox"/> | GOTERM_BP_ALL   | <a href="#">regulation of defense response</a>                    | <a href="#">RT</a> |  | 4     | 3.1E-2  | 8.3E-1    |
| <input type="checkbox"/> | GOTERM_BP_ALL   | <a href="#">regulation of inflammatory response</a>               | <a href="#">RT</a> |  | 4     | 3.1E-2  | 8.3E-1    |
| <input type="checkbox"/> | GOTERM_BP_ALL   | <a href="#">regulation of response to stimulus</a>                | <a href="#">RT</a> |  | 4     | 8.0E-2  | 9.4E-1    |
| Annotation Cluster 11    |                 | Enrichment Score: 1.66                                            | <b>G</b>           |  | Count | P_Value | Benjamini |
| <input type="checkbox"/> | GOTERM_MF_ALL   | <a href="#">integrin binding</a>                                  | <a href="#">RT</a> |  | 6     | 2.6E-4  | 5.0E-1    |
| <input type="checkbox"/> | GOTERM_MF_ALL   | <a href="#">protein complex binding</a>                           | <a href="#">RT</a> |  | 6     | 9.7E-3  | 8.4E-1    |
| <input type="checkbox"/> | UP_SEQ_FEATURE  | short sequence motif:Cell attachment site                         | <a href="#">RT</a> |  | 4     | 1.5E-1  | 1.0E0     |
| <input type="checkbox"/> | KEGG_PATHWAY    | <a href="#">Cell Communication</a>                                | <a href="#">RT</a> |  | 4     | 6.1E-1  | 1.0E0     |
| Annotation Cluster 12    |                 | Enrichment Score: 1.64                                            | <b>G</b>           |  | Count | P_Value | Benjamini |
| <input type="checkbox"/> | GOTERM_BP_ALL   | <a href="#">germ cell development</a>                             | <a href="#">RT</a> |  | 7     | 1.7E-4  | 1.2E-1    |
| <input type="checkbox"/> | GOTERM_BP_ALL   | <a href="#">myeloid cell differentiation</a>                      | <a href="#">RT</a> |  | 9     | 3.1E-3  | 3.9E-1    |
| <input type="checkbox"/> | GOTERM_BP_ALL   | <a href="#">erythrocyte differentiation</a>                       | <a href="#">RT</a> |  | 4     | 5.5E-2  | 9.1E-1    |
| <input type="checkbox"/> | GOTERM_BP_ALL   | <a href="#">positive regulation of cell differentiation</a>       | <a href="#">RT</a> |  | 3     | 3.6E-1  | 1.0E0     |
| <input type="checkbox"/> | GOTERM_BP_ALL   | <a href="#">positive regulation of developmental process</a>      | <a href="#">RT</a> |  | 3     | 5.8E-1  | 1.0E0     |
| Annotation Cluster 13    |                 | Enrichment Score: 1.52                                            | <b>G</b>           |  | Count | P_Value | Benjamini |
| <input type="checkbox"/> | GOTERM_BP_ALL   | <a href="#">bone mineralization</a>                               | <a href="#">RT</a> |  | 6     | 7.5E-4  | 2.4E-1    |
| <input type="checkbox"/> | GOTERM_BP_ALL   | <a href="#">regulation of bone mineralization</a>                 | <a href="#">RT</a> |  | 5     | 7.8E-4  | 2.4E-1    |
| <input type="checkbox"/> | GOTERM_BP_ALL   | <a href="#">hemopoietic or lymphoid organ development</a>         | <a href="#">RT</a> |  | 15    | 2.2E-3  | 3.7E-1    |
| <input type="checkbox"/> | GOTERM_BP_ALL   | <a href="#">hemopoiesis</a>                                       | <a href="#">RT</a> |  | 14    | 2.6E-3  | 3.6E-1    |
| <input type="checkbox"/> | GOTERM_BP_ALL   | <a href="#">myeloid cell differentiation</a>                      | <a href="#">RT</a> |  | 9     | 3.1E-3  | 3.9E-1    |
| <input type="checkbox"/> | GOTERM_BP_ALL   | <a href="#">regulation of myeloid cell differentiation</a>        | <a href="#">RT</a> |  | 6     | 3.3E-3  | 3.9E-1    |
| <input type="checkbox"/> | GOTERM_BP_ALL   | <a href="#">regulation of ossification</a>                        | <a href="#">RT</a> |  | 5     | 3.7E-3  | 4.1E-1    |
| <input type="checkbox"/> | GOTERM_BP_ALL   | <a href="#">immune system development</a>                         | <a href="#">RT</a> |  | 15    | 3.9E-3  | 4.1E-1    |
| <input type="checkbox"/> | GOTERM_BP_ALL   | <a href="#">positive regulation of bone mineralization</a>        | <a href="#">RT</a> |  | 3     | 4.4E-3  | 4.3E-1    |
| <input type="checkbox"/> | GOTERM_BP_ALL   | <a href="#">regulation of bone remodeling</a>                     | <a href="#">RT</a> |  | 5     | 5.9E-3  | 4.9E-1    |
| <input type="checkbox"/> | GOTERM_BP_ALL   | <a href="#">positive regulation of ossification</a>               | <a href="#">RT</a> |  | 3     | 9.1E-3  | 5.7E-1    |
| <input type="checkbox"/> | GOTERM_BP_ALL   | <a href="#">positive regulation of bone remodeling</a>            | <a href="#">RT</a> |  | 3     | 9.1E-3  | 5.7E-1    |
| <input type="checkbox"/> | GOTERM_BP_ALL   | <a href="#">regulation of cell differentiation</a>                | <a href="#">RT</a> |  | 10    | 2.1E-2  | 7.7E-1    |
| <input type="checkbox"/> | GOTERM_BP_ALL   | <a href="#">ossification</a>                                      | <a href="#">RT</a> |  | 7     | 2.7E-2  | 8.1E-1    |
| <input type="checkbox"/> | GOTERM_BP_ALL   | <a href="#">biomineral formation</a>                              | <a href="#">RT</a> |  | 7     | 2.8E-2  | 8.2E-1    |
| <input type="checkbox"/> | GOTERM_BP_ALL   | <a href="#">skeletal development</a>                              | <a href="#">RT</a> |  | 10    | 3.0E-2  | 8.3E-1    |
| <input type="checkbox"/> | GOTERM_BP_ALL   | <a href="#">regulation of osteoblast differentiation</a>          | <a href="#">RT</a> |  | 3     | 3.6E-2  | 8.4E-1    |
| <input type="checkbox"/> | GOTERM_BP_ALL   | <a href="#">bone remodeling</a>                                   | <a href="#">RT</a> |  | 7     | 3.8E-2  | 8.6E-1    |
| <input type="checkbox"/> | GOTERM_BP_ALL   | <a href="#">negative regulation of bone remodeling</a>            | <a href="#">RT</a> |  | 3     | 4.0E-2  | 8.6E-1    |
| <input type="checkbox"/> | GOTERM_BP_ALL   | <a href="#">erythrocyte differentiation</a>                       | <a href="#">RT</a> |  | 4     | 5.5E-2  | 9.1E-1    |
| <input type="checkbox"/> | GOTERM_BP_ALL   | <a href="#">negative regulation of cell differentiation</a>       | <a href="#">RT</a> |  | 6     | 5.9E-2  | 9.2E-1    |
| <input type="checkbox"/> | GOTERM_BP_ALL   | <a href="#">tissue remodeling</a>                                 | <a href="#">RT</a> |  | 7     | 7.2E-2  | 9.3E-1    |
| <input type="checkbox"/> | SP_PIR_KEYWORDS | <a href="#">cytokine</a>                                          | <a href="#">RT</a> |  | 8     | 7.3E-2  | 8.9E-1    |

|                          |                 |                                                                                          |                    |  |       |         |           |
|--------------------------|-----------------|------------------------------------------------------------------------------------------|--------------------|--|-------|---------|-----------|
| <input type="checkbox"/> | GOTERM_BP_ALL   | <a href="#">negative regulation of myeloid cell differentiation</a>                      | <a href="#">RT</a> |  | 3     | 7.4E-2  | 9.3E-1    |
| <input type="checkbox"/> | GOTERM_BP_ALL   | <a href="#">negative regulation of developmental process</a>                             | <a href="#">RT</a> |  | 6     | 1.1E-1  | 9.7E-1    |
| <input type="checkbox"/> | GOTERM_BP_ALL   | <a href="#">regulation of developmental process</a>                                      | <a href="#">RT</a> |  | 11    | 1.2E-1  | 9.8E-1    |
| <input type="checkbox"/> | GOTERM_BP_ALL   | <a href="#">transmembrane receptor protein serine/threonine kinase signaling pathway</a> | <a href="#">RT</a> |  | 5     | 1.2E-1  | 9.7E-1    |
| <input type="checkbox"/> | GOTERM_BP_ALL   | <a href="#">osteoblast differentiation</a>                                               | <a href="#">RT</a> |  | 3     | 1.4E-1  | 9.8E-1    |
| <input type="checkbox"/> | GOTERM_BP_ALL   | <a href="#">BMP signaling pathway</a>                                                    | <a href="#">RT</a> |  | 3     | 1.6E-1  | 9.9E-1    |
| <input type="checkbox"/> | GOTERM_CC_ALL   | <a href="#">proteinaceous extracellular matrix</a>                                       | <a href="#">RT</a> |  | 10    | 1.6E-1  | 1.0E0     |
| <input type="checkbox"/> | GOTERM_CC_ALL   | <a href="#">extracellular matrix</a>                                                     | <a href="#">RT</a> |  | 10    | 1.8E-1  | 1.0E0     |
| <input type="checkbox"/> | GOTERM_BP_ALL   | <a href="#">negative regulation of multicellular organismal process</a>                  | <a href="#">RT</a> |  | 3     | 1.9E-1  | 9.9E-1    |
| <input type="checkbox"/> | GOTERM_BP_ALL   | <a href="#">tissue development</a>                                                       | <a href="#">RT</a> |  | 10    | 2.2E-1  | 9.9E-1    |
| <input type="checkbox"/> | GOTERM_MF_ALL   | <a href="#">cytokine activity</a>                                                        | <a href="#">RT</a> |  | 7     | 3.8E-1  | 1.0E0     |
| <input type="checkbox"/> | GOTERM_MF_ALL   | <a href="#">receptor binding</a>                                                         | <a href="#">RT</a> |  | 14    | 6.6E-1  | 1.0E0     |
| <input type="checkbox"/> | GOTERM_MF_ALL   | <a href="#">growth factor activity</a>                                                   | <a href="#">RT</a> |  | 4     | 7.1E-1  | 1.0E0     |
| Annotation Cluster 14    |                 | Enrichment Score: 1.39                                                                   | <b>G</b>           |  | Count | P_Value | Benjamini |
| <input type="checkbox"/> | SP_PIR_KEYWORDS | <a href="#">calcium binding</a>                                                          | <a href="#">RT</a> |  | 8     | 1.8E-4  | 7.3E-2    |
| <input type="checkbox"/> | GOTERM_BP_ALL   | <a href="#">muscle system process</a>                                                    | <a href="#">RT</a> |  | 3     | 6.1E-1  | 1.0E0     |
| <input type="checkbox"/> | GOTERM_BP_ALL   | <a href="#">muscle contraction</a>                                                       | <a href="#">RT</a> |  | 3     | 6.1E-1  | 1.0E0     |
| Annotation Cluster 15    |                 | Enrichment Score: 1.38                                                                   | <b>G</b>           |  | Count | P_Value | Benjamini |
| <input type="checkbox"/> | UP_SEQ_FEATURE  | metal ion-binding site:Calcium 3 (via carbonyl oxygen)                                   | <a href="#">RT</a> |  | 5     | 3.2E-4  | 9.9E-1    |
| <input type="checkbox"/> | UP_SEQ_FEATURE  | metal ion-binding site:Calcium 4 (via carbonyl oxygen)                                   | <a href="#">RT</a> |  | 4     | 4.1E-4  | 9.5E-1    |
| <input type="checkbox"/> | UP_SEQ_FEATURE  | propeptide:Activation peptide                                                            | <a href="#">RT</a> |  | 7     | 2.0E-3  | 1.0E0     |
| <input type="checkbox"/> | UP_SEQ_FEATURE  | metal ion-binding site:Calcium 1                                                         | <a href="#">RT</a> |  | 5     | 9.5E-3  | 1.0E0     |
| <input type="checkbox"/> | UP_SEQ_FEATURE  | metal ion-binding site:Calcium 2                                                         | <a href="#">RT</a> |  | 5     | 1.3E-2  | 1.0E0     |
| <input type="checkbox"/> | GOTERM_BP_ALL   | <a href="#">peptidoglycan metabolic process</a>                                          | <a href="#">RT</a> |  | 4     | 1.3E-2  | 6.8E-1    |
| <input type="checkbox"/> | UP_SEQ_FEATURE  | metal ion-binding site:Calcium 3                                                         | <a href="#">RT</a> |  | 4     | 1.4E-2  | 1.0E0     |
| <input type="checkbox"/> | UP_SEQ_FEATURE  | metal ion-binding site:Calcium 2 (via carbonyl oxygen)                                   | <a href="#">RT</a> |  | 4     | 2.0E-2  | 1.0E0     |
| <input type="checkbox"/> | UP_SEQ_FEATURE  | metal ion-binding site:Zinc 2 (in inhibited form)                                        | <a href="#">RT</a> |  | 3     | 2.2E-2  | 1.0E0     |
| <input type="checkbox"/> | UP_SEQ_FEATURE  | metal ion-binding site:Zinc 2 (catalytic)                                                | <a href="#">RT</a> |  | 3     | 2.6E-2  | 1.0E0     |
| <input type="checkbox"/> | SP_PIR_KEYWORDS | <a href="#">metalloproteinase</a>                                                        | <a href="#">RT</a> |  | 3     | 3.0E-2  | 8.1E-1    |
| <input type="checkbox"/> | INTERPRO        | <a href="#">Peptidoglycan binding-like</a>                                               | <a href="#">RT</a> |  | 3     | 5.8E-2  | 1.0E0     |
| <input type="checkbox"/> | SP_PIR_KEYWORDS | <a href="#">extracellular matrix</a>                                                     | <a href="#">RT</a> |  | 9     | 7.1E-2  | 8.9E-1    |
| <input type="checkbox"/> | UP_SEQ_FEATURE  | domain:Hemopexin-like 3                                                                  | <a href="#">RT</a> |  | 3     | 7.2E-2  | 1.0E0     |
| <input type="checkbox"/> | UP_SEQ_FEATURE  | domain:Hemopexin-like 4                                                                  | <a href="#">RT</a> |  | 3     | 7.2E-2  | 1.0E0     |
| <input type="checkbox"/> | UP_SEQ_FEATURE  | domain:Hemopexin-like 1                                                                  | <a href="#">RT</a> |  | 3     | 7.9E-2  | 1.0E0     |
| <input type="checkbox"/> | UP_SEQ_FEATURE  | domain:Hemopexin-like 2                                                                  | <a href="#">RT</a> |  | 3     | 7.9E-2  | 1.0E0     |
| <input type="checkbox"/> | INTERPRO        | <a href="#">Hemopexin</a>                                                                | <a href="#">RT</a> |  | 3     | 9.0E-2  | 1.0E0     |
| <input type="checkbox"/> | SMART           | <a href="#">HX</a>                                                                       | <a href="#">RT</a> |  | 3     | 9.4E-2  | 1.0E0     |
| <input type="checkbox"/> | INTERPRO        | <a href="#">Peptidase, metallopeptidases</a>                                             | <a href="#">RT</a> |  | 3     | 9.6E-2  | 1.0E0     |
| <input type="checkbox"/> | SMART           | <a href="#">ZnMc</a>                                                                     | <a href="#">RT</a> |  | 3     | 1.0E-1  | 1.0E0     |
| <input type="checkbox"/> | INTERPRO        | <a href="#">Peptidase M10A and M12B, matrixin and adamalysin</a>                         | <a href="#">RT</a> |  | 3     | 1.8E-1  | 1.0E0     |
| <input type="checkbox"/> | UP_SEQ_FEATURE  | short sequence motif:Cysteine switch                                                     | <a href="#">RT</a> |  | 3     | 1.9E-1  | 1.0E0     |
| <input type="checkbox"/> | UP_SEQ_FEATURE  | metal ion-binding site:Zinc 1                                                            | <a href="#">RT</a> |  | 3     | 3.1E-1  | 1.0E0     |
| <input type="checkbox"/> | INTERPRO        | <a href="#">Peptidase M, neutral zinc metallopeptidases, zinc-binding site</a>           | <a href="#">RT</a> |  | 3     | 4.8E-1  | 1.0E0     |
| <input type="checkbox"/> | GOTERM_MF_ALL   | <a href="#">metalloendopeptidase activity</a>                                            | <a href="#">RT</a> |  | 3     | 6.5E-1  | 1.0E0     |
| <input type="checkbox"/> | SP_PIR_KEYWORDS | <a href="#">metalloprotease</a>                                                          | <a href="#">RT</a> |  | 3     | 7.6E-1  | 1.0E0     |
| Annotation Cluster 16    |                 | Enrichment Score: 1.31                                                                   | <b>G</b>           |  | Count | P_Value | Benjamini |

| <input type="checkbox"/> |                       |                                                                                                                                               |                    |  |  |  |  |       |         |           |  |
|--------------------------|-----------------------|-----------------------------------------------------------------------------------------------------------------------------------------------|--------------------|--|--|--|--|-------|---------|-----------|--|
| <input type="checkbox"/> | GOTERM_BP_ALL         | <a href="#">regulation of kinase activity</a>                                                                                                 | <a href="#">RT</a> |  |  |  |  | 10    | 1.4E-2  | 7.0E-1    |  |
| <input type="checkbox"/> | GOTERM_BP_ALL         | <a href="#">regulation of transferase activity</a>                                                                                            | <a href="#">RT</a> |  |  |  |  | 10    | 1.8E-2  | 7.4E-1    |  |
| <input type="checkbox"/> | GOTERM_BP_ALL         | <a href="#">regulation of protein kinase activity</a>                                                                                         | <a href="#">RT</a> |  |  |  |  | 9     | 3.1E-2  | 8.3E-1    |  |
| <input type="checkbox"/> | GOTERM_BP_ALL         | <a href="#">negative regulation of protein kinase activity</a>                                                                                | <a href="#">RT</a> |  |  |  |  | 4     | 8.0E-2  | 9.4E-1    |  |
| <input type="checkbox"/> | GOTERM_BP_ALL         | <a href="#">negative regulation of kinase activity</a>                                                                                        | <a href="#">RT</a> |  |  |  |  | 4     | 8.0E-2  | 9.4E-1    |  |
| <input type="checkbox"/> | GOTERM_BP_ALL         | <a href="#">negative regulation of transferase activity</a>                                                                                   | <a href="#">RT</a> |  |  |  |  | 4     | 8.9E-2  | 9.5E-1    |  |
| <input type="checkbox"/> | GOTERM_BP_ALL         | <a href="#">negative regulation of catalytic activity</a>                                                                                     | <a href="#">RT</a> |  |  |  |  | 4     | 1.5E-1  | 9.8E-1    |  |
|                          | Annotation Cluster 17 | Enrichment Score: 1.27                                                                                                                        | <b>G</b>           |  |  |  |  | Count | P_Value | Benjamini |  |
| <input type="checkbox"/> | GOTERM_BP_ALL         | <a href="#">negative regulation of progression through cell cycle</a>                                                                         | <a href="#">RT</a> |  |  |  |  | 10    | 3.2E-3  | 3.9E-1    |  |
| <input type="checkbox"/> | GOTERM_BP_ALL         | <a href="#">regulation of progression through cell cycle</a>                                                                                  | <a href="#">RT</a> |  |  |  |  | 16    | 1.5E-2  | 7.2E-1    |  |
| <input type="checkbox"/> | GOTERM_BP_ALL         | <a href="#">regulation of cell cycle</a>                                                                                                      | <a href="#">RT</a> |  |  |  |  | 16    | 1.6E-2  | 7.3E-1    |  |
| <input type="checkbox"/> | GOTERM_BP_ALL         | <a href="#">cell cycle process</a>                                                                                                            | <a href="#">RT</a> |  |  |  |  | 18    | 1.3E-1  | 9.8E-1    |  |
| <input type="checkbox"/> | GOTERM_BP_ALL         | <a href="#">cell cycle</a>                                                                                                                    | <a href="#">RT</a> |  |  |  |  | 19    | 3.3E-1  | 1.0E0     |  |
| <input type="checkbox"/> | SP_PIR_KEYWORDS       | <a href="#">cell cycle</a>                                                                                                                    | <a href="#">RT</a> |  |  |  |  | 8     | 6.7E-1  | 1.0E0     |  |
|                          | Annotation Cluster 18 | Enrichment Score: 1.24                                                                                                                        | <b>G</b>           |  |  |  |  | Count | P_Value | Benjamini |  |
| <input type="checkbox"/> | GOTERM_MF_ALL         | <a href="#">lipid binding</a>                                                                                                                 | <a href="#">RT</a> |  |  |  |  | 16    | 3.2E-2  | 9.9E-1    |  |
| <input type="checkbox"/> | GOTERM_MF_ALL         | <a href="#">phospholipid binding</a>                                                                                                          | <a href="#">RT</a> |  |  |  |  | 10    | 6.2E-2  | 1.0E0     |  |
| <input type="checkbox"/> | GOTERM_MF_ALL         | <a href="#">phosphoinositide binding</a>                                                                                                      | <a href="#">RT</a> |  |  |  |  | 8     | 9.6E-2  | 1.0E0     |  |
|                          | Annotation Cluster 19 | Enrichment Score: 1.23                                                                                                                        | <b>G</b>           |  |  |  |  | Count | P_Value | Benjamini |  |
| <input type="checkbox"/> | SP_PIR_KEYWORDS       | <a href="#">zinc-finger</a>                                                                                                                   | <a href="#">RT</a> |  |  |  |  | 39    | 1.3E-2  | 6.4E-1    |  |
| <input type="checkbox"/> | SP_PIR_KEYWORDS       | <a href="#">zinc</a>                                                                                                                          | <a href="#">RT</a> |  |  |  |  | 46    | 2.3E-2  | 7.6E-1    |  |
| <input type="checkbox"/> | GOTERM_MF_ALL         | <a href="#">transition metal ion binding</a>                                                                                                  | <a href="#">RT</a> |  |  |  |  | 65    | 3.7E-2  | 9.9E-1    |  |
| <input type="checkbox"/> | SP_PIR_KEYWORDS       | <a href="#">metal-binding</a>                                                                                                                 | <a href="#">RT</a> |  |  |  |  | 57    | 6.9E-2  | 9.0E-1    |  |
| <input type="checkbox"/> | GOTERM_MF_ALL         | <a href="#">cation binding</a>                                                                                                                | <a href="#">RT</a> |  |  |  |  | 84    | 8.7E-2  | 1.0E0     |  |
| <input type="checkbox"/> | GOTERM_MF_ALL         | <a href="#">zinc ion binding</a>                                                                                                              | <a href="#">RT</a> |  |  |  |  | 51    | 8.9E-2  | 1.0E0     |  |
| <input type="checkbox"/> | GOTERM_MF_ALL         | <a href="#">ion binding</a>                                                                                                                   | <a href="#">RT</a> |  |  |  |  | 90    | 1.4E-1  | 1.0E0     |  |
| <input type="checkbox"/> | GOTERM_MF_ALL         | <a href="#">metal ion binding</a>                                                                                                             | <a href="#">RT</a> |  |  |  |  | 87    | 1.8E-1  | 1.0E0     |  |
|                          | Annotation Cluster 20 | Enrichment Score: 1.22                                                                                                                        | <b>G</b>           |  |  |  |  | Count | P_Value | Benjamini |  |
| <input type="checkbox"/> | GOTERM_MF_ALL         | <a href="#">pancreatic ribonuclease activity</a>                                                                                              | <a href="#">RT</a> |  |  |  |  | 4     | 4.6E-3  | 7.9E-1    |  |
| <input type="checkbox"/> | INTERPRO              | <a href="#">Pancreatic ribonuclease</a>                                                                                                       | <a href="#">RT</a> |  |  |  |  | 4     | 4.7E-3  | 1.0E0     |  |
| <input type="checkbox"/> | SMART                 | <a href="#">RNase Pc</a>                                                                                                                      | <a href="#">RT</a> |  |  |  |  | 4     | 5.1E-3  | 9.6E-1    |  |
| <input type="checkbox"/> | GOTERM_MF_ALL         | <a href="#">endoribonuclease activity, producing 3'-phosphomonoesters</a>                                                                     | <a href="#">RT</a> |  |  |  |  | 4     | 6.5E-3  | 8.0E-1    |  |
| <input type="checkbox"/> | GOTERM_MF_ALL         | <a href="#">endonuclease activity, active with either ribo- or deoxyribonucleic acids and producing 3'-phosphomonoesters</a>                  | <a href="#">RT</a> |  |  |  |  | 4     | 8.8E-3  | 8.6E-1    |  |
| <input type="checkbox"/> | GOTERM_MF_ALL         | <a href="#">ribonuclease activity</a>                                                                                                         | <a href="#">RT</a> |  |  |  |  | 5     | 4.6E-2  | 9.9E-1    |  |
| <input type="checkbox"/> | GOTERM_MF_ALL         | <a href="#">endoribonuclease activity</a>                                                                                                     | <a href="#">RT</a> |  |  |  |  | 4     | 6.3E-2  | 1.0E0     |  |
| <input type="checkbox"/> | UP_SEQ_FEATURE        | active site:Proton donor                                                                                                                      | <a href="#">RT</a> |  |  |  |  | 5     | 2.1E-1  | 1.0E0     |  |
| <input type="checkbox"/> | SP_PIR_KEYWORDS       | <a href="#">nuclease</a>                                                                                                                      | <a href="#">RT</a> |  |  |  |  | 4     | 2.2E-1  | 9.8E-1    |  |
| <input type="checkbox"/> | UP_SEQ_FEATURE        | region of interest:Substrate binding                                                                                                          | <a href="#">RT</a> |  |  |  |  | 3     | 2.8E-1  | 1.0E0     |  |
| <input type="checkbox"/> | GOTERM_MF_ALL         | <a href="#">endonuclease activity</a>                                                                                                         | <a href="#">RT</a> |  |  |  |  | 4     | 2.9E-1  | 1.0E0     |  |
| <input type="checkbox"/> | SP_PIR_KEYWORDS       | <a href="#">Endonuclease</a>                                                                                                                  | <a href="#">RT</a> |  |  |  |  | 3     | 3.0E-1  | 9.9E-1    |  |
| <input type="checkbox"/> | GOTERM_MF_ALL         | <a href="#">nuclease activity</a>                                                                                                             | <a href="#">RT</a> |  |  |  |  | 5     | 3.9E-1  | 1.0E0     |  |
| <input type="checkbox"/> | GOTERM_MF_ALL         | <a href="#">hydrolase activity, acting on ester bonds</a>                                                                                     | <a href="#">RT</a> |  |  |  |  | 10    | 9.3E-1  | 1.0E0     |  |
|                          | Annotation Cluster 21 | Enrichment Score: 1.21                                                                                                                        | <b>G</b>           |  |  |  |  | Count | P_Value | Benjamini |  |
| <input type="checkbox"/> | GOTERM_MF_ALL         | <a href="#">oxidoreductase activity, acting on single donors with incorporation of molecular oxygen, incorporation of two atoms of oxygen</a> | <a href="#">RT</a> |  |  |  |  | 5     | 3.7E-2  | 9.9E-1    |  |
| <input type="checkbox"/> | GOTERM_MF_ALL         | <a href="#">dioxygenase activity</a>                                                                                                          | <a href="#">RT</a> |  |  |  |  | 5     | 3.7E-2  | 9.9E-1    |  |
| <input type="checkbox"/> | GOTERM_MF_ALL         | <a href="#">oxidoreductase activity, acting on single donors with incorporation of molecular</a>                                              | <a href="#">RT</a> |  |  |  |  | 5     | 3.9E-2  | 9.9E-1    |  |

| <input type="checkbox"/> | GOTERM_MF_ALL         | <a href="#">oxygen</a>                              |          |  |  |  |       |         |           |  |
|--------------------------|-----------------------|-----------------------------------------------------|----------|--|--|--|-------|---------|-----------|--|
| <input type="checkbox"/> |                       | <a href="#">iron ion binding</a>                    | RT       |  |  |  |       |         |           |  |
|                          | Annotation Cluster 22 | Enrichment Score: 1.2                               | <b>G</b> |  |  |  | Count | P_Value | Benjamini |  |
| <input type="checkbox"/> | GOTERM_BP_ALL         | <a href="#">germ cell development</a>               | RT       |  |  |  | 7     | 1.7E-4  | 1.2E-1    |  |
| <input type="checkbox"/> | GOTERM_BP_ALL         | <a href="#">gamete generation</a>                   | RT       |  |  |  | 11    | 5.3E-2  | 9.0E-1    |  |
| <input type="checkbox"/> | GOTERM_BP_ALL         | <a href="#">sexual reproduction</a>                 | RT       |  |  |  | 12    | 7.2E-2  | 9.3E-1    |  |
| <input type="checkbox"/> | GOTERM_BP_ALL         | <a href="#">reproduction</a>                        | RT       |  |  |  | 13    | 2.9E-1  | 1.0E0     |  |
| <input type="checkbox"/> | GOTERM_BP_ALL         | <a href="#">male gamete generation</a>              | RT       |  |  |  | 5     | 6.0E-1  | 1.0E0     |  |
| <input type="checkbox"/> | GOTERM_BP_ALL         | <a href="#">spermatogenesis</a>                     | RT       |  |  |  | 5     | 6.0E-1  | 1.0E0     |  |
|                          | Annotation Cluster 23 | Enrichment Score: 1.17                              | <b>G</b> |  |  |  | Count | P_Value | Benjamini |  |
| <input type="checkbox"/> | GOTERM_BP_ALL         | <a href="#">cell-substrate adhesion</a>             | RT       |  |  |  | 8     | 2.2E-3  | 3.4E-1    |  |
| <input type="checkbox"/> | KEGG_PATHWAY          | <a href="#">ECM-receptor interaction</a>            | RT       |  |  |  | 8     | 7.3E-3  | 7.9E-1    |  |
| <input type="checkbox"/> | GOTERM_BP_ALL         | <a href="#">cell-matrix adhesion</a>                | RT       |  |  |  | 7     | 7.6E-3  | 5.4E-1    |  |
| <input type="checkbox"/> | PIR_SUPERFAMILY       | PIRSF002512:integrin, beta subunit                  | RT       |  |  |  | 3     | 1.2E-2  | 1.0E0     |  |
| <input type="checkbox"/> | INTERPRO              | <a href="#">Integrin beta subunit, subgroup</a>     | RT       |  |  |  | 3     | 1.2E-2  | 1.0E0     |  |
| <input type="checkbox"/> | INTERPRO              | <a href="#">Integrin beta subunit, tail</a>         | RT       |  |  |  | 3     | 1.6E-2  | 1.0E0     |  |
| <input type="checkbox"/> | INTERPRO              | <a href="#">Integrin beta subunit, N-terminal</a>   | RT       |  |  |  | 3     | 1.6E-2  | 1.0E0     |  |
| <input type="checkbox"/> | INTERPRO              | <a href="#">Integrin beta subunit, C-terminal</a>   | RT       |  |  |  | 3     | 1.9E-2  | 1.0E0     |  |
| <input type="checkbox"/> | INTERPRO              | <a href="#">Integrin beta subunit</a>               | RT       |  |  |  | 3     | 1.9E-2  | 1.0E0     |  |
| <input type="checkbox"/> | SMART                 | <a href="#">INB</a>                                 | RT       |  |  |  | 3     | 2.0E-2  | 9.8E-1    |  |
| <input type="checkbox"/> | GOTERM_BP_ALL         | <a href="#">cell adhesion</a>                       | RT       |  |  |  | 23    | 3.5E-2  | 8.4E-1    |  |
| <input type="checkbox"/> | GOTERM_BP_ALL         | <a href="#">biological adhesion</a>                 | RT       |  |  |  | 23    | 3.5E-2  | 8.4E-1    |  |
| <input type="checkbox"/> | KEGG_PATHWAY          | <a href="#">Focal adhesion</a>                      | RT       |  |  |  | 10    | 7.0E-2  | 8.5E-1    |  |
| <input type="checkbox"/> | SP_PIR_KEYWORDS       | <a href="#">duplication</a>                         | RT       |  |  |  | 6     | 1.3E-1  | 9.4E-1    |  |
| <input type="checkbox"/> | SP_PIR_KEYWORDS       | <a href="#">Integrin</a>                            | RT       |  |  |  | 4     | 1.6E-1  | 9.5E-1    |  |
| <input type="checkbox"/> | GOTERM_CC_ALL         | <a href="#">integrin complex</a>                    | RT       |  |  |  | 3     | 1.6E-1  | 1.0E0     |  |
| <input type="checkbox"/> | INTERPRO              | <a href="#">von Willebrand factor, type A</a>       | RT       |  |  |  | 4     | 2.4E-1  | 1.0E0     |  |
| <input type="checkbox"/> | SMART                 | <a href="#">VWA</a>                                 | RT       |  |  |  | 4     | 2.7E-1  | 1.0E0     |  |
| <input type="checkbox"/> | INTERPRO              | <a href="#">Plexin/semaphorin/integrin</a>          | RT       |  |  |  | 3     | 2.8E-1  | 1.0E0     |  |
| <input type="checkbox"/> | GOTERM_BP_ALL         | <a href="#">integrin-mediated signaling pathway</a> | RT       |  |  |  | 4     | 2.8E-1  | 1.0E0     |  |
| <input type="checkbox"/> | SMART                 | <a href="#">PSI</a>                                 | RT       |  |  |  | 3     | 2.9E-1  | 1.0E0     |  |
| <input type="checkbox"/> | SP_PIR_KEYWORDS       | <a href="#">cell adhesion</a>                       | RT       |  |  |  | 10    | 3.2E-1  | 9.9E-1    |  |
| <input type="checkbox"/> | KEGG_PATHWAY          | <a href="#">Cell adhesion molecules (CAMs)</a>      | RT       |  |  |  | 5     | 5.0E-1  | 9.9E-1    |  |
| <input type="checkbox"/> | GOTERM_CC_ALL         | <a href="#">receptor complex</a>                    | RT       |  |  |  | 3     | 5.1E-1  | 1.0E0     |  |
| <input type="checkbox"/> | GOTERM_MF_ALL         | <a href="#">identical protein binding</a>           | RT       |  |  |  | 7     | 5.9E-1  | 1.0E0     |  |
| <input type="checkbox"/> | KEGG_PATHWAY          | <a href="#">Regulation of actin cytoskeleton</a>    | RT       |  |  |  | 5     | 8.0E-1  | 1.0E0     |  |
|                          | Annotation Cluster 24 | Enrichment Score: 1.15                              | <b>G</b> |  |  |  | Count | P_Value | Benjamini |  |
| <input type="checkbox"/> | GOTERM_MF_ALL         | <a href="#">pattern binding</a>                     | RT       |  |  |  | 10    | 4.7E-4  | 4.7E-1    |  |
| <input type="checkbox"/> | GOTERM_MF_ALL         | <a href="#">polysaccharide binding</a>              | RT       |  |  |  | 9     | 1.3E-3  | 5.9E-1    |  |
| <input type="checkbox"/> | GOTERM_MF_ALL         | <a href="#">heparin binding</a>                     | RT       |  |  |  | 7     | 4.1E-3  | 7.9E-1    |  |
| <input type="checkbox"/> | GOTERM_MF_ALL         | <a href="#">carbohydrate binding</a>                | RT       |  |  |  | 15    | 5.6E-3  | 8.1E-1    |  |
| <input type="checkbox"/> | GOTERM_BP_ALL         | <a href="#">chondrocyte differentiation</a>         | RT       |  |  |  | 4     | 6.4E-3  | 5.1E-1    |  |
| <input type="checkbox"/> | GOTERM_MF_ALL         | <a href="#">glycosaminoglycan binding</a>           | RT       |  |  |  | 7     | 1.4E-2  | 9.1E-1    |  |
| <input type="checkbox"/> | GOTERM_BP_ALL         | <a href="#">cartilage development</a>               | RT       |  |  |  | 5     | 3.4E-2  | 8.4E-1    |  |
| <input type="checkbox"/> | GOTERM_BP_ALL         | <a href="#">anatomical structure formation</a>      | RT       |  |  |  | 10    | 4.2E-2  | 8.6E-1    |  |
| <input type="checkbox"/> | UP_SEQ_FEATURE        | region of interest:Heparin-binding                  | RT       |  |  |  | 3     | 4.7E-2  | 1.0E0     |  |
| <input type="checkbox"/> | GOTERM_BP_ALL         | <a href="#">angiogenesis</a>                        | RT       |  |  |  | 8     | 6.0E-2  | 9.2E-1    |  |
| <input type="checkbox"/> | SP_PIR_KEYWORDS       | <a href="#">heparin-binding</a>                     | RT       |  |  |  | 4     | 1.2E-1  | 9.4E-1    |  |
| <input type="checkbox"/> | GOTERM_BP_ALL         | <a href="#">blood vessel development</a>            | RT       |  |  |  | 9     | 1.4E-1  | 9.8E-1    |  |
| <input type="checkbox"/> | GOTERM_BP_ALL         | <a href="#">vasculature development</a>             | RT       |  |  |  | 9     | 1.5E-1  | 9.8E-1    |  |

| <input type="checkbox"/> | GO TERM         | Enrichment Score                                                   | RT | Count | P-Value | Benjamini |
|--------------------------|-----------------|--------------------------------------------------------------------|----|-------|---------|-----------|
| <input type="checkbox"/> | GOTERM_BP_ALL   | <a href="#">blood vessel morphogenesis</a>                         | RT | 8     | 1.5E-1  | 9.8E-1    |
| <input type="checkbox"/> | GOTERM_BP_ALL   | <a href="#">branching morphogenesis of a tube</a>                  | RT | 4     | 1.6E-1  | 9.9E-1    |
| <input type="checkbox"/> | GOTERM_BP_ALL   | <a href="#">morphogenesis of a branching structure</a>             | RT | 4     | 1.9E-1  | 9.9E-1    |
| <input type="checkbox"/> | GOTERM_BP_ALL   | <a href="#">lung development</a>                                   | RT | 4     | 1.9E-1  | 9.9E-1    |
| <input type="checkbox"/> | GOTERM_BP_ALL   | <a href="#">respiratory tube development</a>                       | RT | 4     | 2.0E-1  | 9.9E-1    |
| <input type="checkbox"/> | GOTERM_BP_ALL   | <a href="#">heart development</a>                                  | RT | 7     | 2.2E-1  | 9.9E-1    |
| <input type="checkbox"/> | GOTERM_BP_ALL   | <a href="#">tube morphogenesis</a>                                 | RT | 6     | 2.3E-1  | 9.9E-1    |
| <input type="checkbox"/> | GOTERM_BP_ALL   | <a href="#">tube development</a>                                   | RT | 7     | 2.8E-1  | 1.0E0     |
| <input type="checkbox"/> | GOTERM_BP_ALL   | <a href="#">sensory organ development</a>                          | RT | 6     | 3.6E-1  | 1.0E0     |
| <input type="checkbox"/> | GOTERM_BP_ALL   | <a href="#">central nervous system development</a>                 | RT | 7     | 4.5E-1  | 1.0E0     |
| <input type="checkbox"/> | GOTERM_BP_ALL   | <a href="#">brain development</a>                                  | RT | 5     | 6.1E-1  | 1.0E0     |
| <input type="checkbox"/> | GOTERM_BP_ALL   | <a href="#">organ morphogenesis</a>                                | RT | 12    | 6.3E-1  | 1.0E0     |
| <input type="checkbox"/> | GOTERM_BP_ALL   | <a href="#">cell fate commitment</a>                               | RT | 3     | 6.7E-1  | 1.0E0     |
| Annotation Cluster 25    |                 | Enrichment Score: 1.14                                             | G  |       |         |           |
| <input type="checkbox"/> | GOTERM_BP_ALL   | <a href="#">regulation of a molecular function</a>                 | RT | 18    | 8.1E-3  | 5.6E-1    |
| <input type="checkbox"/> | GOTERM_BP_ALL   | <a href="#">regulation of kinase activity</a>                      | RT | 10    | 1.4E-2  | 7.0E-1    |
| <input type="checkbox"/> | GOTERM_BP_ALL   | <a href="#">regulation of transferase activity</a>                 | RT | 10    | 1.8E-2  | 7.4E-1    |
| <input type="checkbox"/> | GOTERM_BP_ALL   | <a href="#">regulation of catalytic activity</a>                   | RT | 15    | 2.6E-2  | 8.1E-1    |
| <input type="checkbox"/> | GOTERM_BP_ALL   | <a href="#">regulation of protein kinase activity</a>              | RT | 9     | 3.1E-2  | 8.3E-1    |
| <input type="checkbox"/> | GOTERM_BP_ALL   | <a href="#">positive regulation of catalytic activity</a>          | RT | 6     | 3.7E-1  | 1.0E0     |
| <input type="checkbox"/> | GOTERM_BP_ALL   | <a href="#">positive regulation of protein kinase activity</a>     | RT | 4     | 4.2E-1  | 1.0E0     |
| <input type="checkbox"/> | GOTERM_BP_ALL   | <a href="#">positive regulation of kinase activity</a>             | RT | 4     | 4.5E-1  | 1.0E0     |
| <input type="checkbox"/> | GOTERM_BP_ALL   | <a href="#">positive regulation of transferase activity</a>        | RT | 4     | 4.8E-1  | 1.0E0     |
| Annotation Cluster 26    |                 | Enrichment Score: 1.11                                             | G  |       |         |           |
| <input type="checkbox"/> | GOTERM_MF_ALL   | <a href="#">UDP-galactosyltransferase activity</a>                 | RT | 4     | 6.5E-3  | 8.0E-1    |
| <input type="checkbox"/> | GOTERM_MF_ALL   | <a href="#">galactosyltransferase activity</a>                     | RT | 4     | 2.5E-2  | 9.8E-1    |
| <input type="checkbox"/> | SP_PIR_KEYWORDS | <a href="#">signal-anchor</a>                                      | RT | 14    | 3.1E-2  | 7.9E-1    |
| <input type="checkbox"/> | SP_PIR_KEYWORDS | <a href="#">glycosyltransferase</a>                                | RT | 9     | 4.1E-2  | 8.5E-1    |
| <input type="checkbox"/> | KEGG_PATHWAY    | <a href="#">Glycan structures - biosynthesis 2</a>                 | RT | 5     | 5.5E-2  | 8.6E-1    |
| <input type="checkbox"/> | GOTERM_MF_ALL   | <a href="#">UDP-glycosyltransferase activity</a>                   | RT | 6     | 6.0E-2  | 1.0E0     |
| <input type="checkbox"/> | GOTERM_MF_ALL   | <a href="#">transferase activity, transferring glycosyl groups</a> | RT | 10    | 7.2E-2  | 1.0E0     |
| <input type="checkbox"/> | KEGG_PATHWAY    | <a href="#">Glycosphingolipid biosynthesis - neolactoseries</a>    | RT | 3     | 7.2E-2  | 8.3E-1    |
| <input type="checkbox"/> | GOTERM_BP_ALL   | <a href="#">glycoprotein metabolic process</a>                     | RT | 6     | 1.1E-1  | 9.7E-1    |
| <input type="checkbox"/> | GOTERM_BP_ALL   | <a href="#">protein amino acid glycosylation</a>                   | RT | 5     | 1.1E-1  | 9.7E-1    |
| <input type="checkbox"/> | GOTERM_MF_ALL   | <a href="#">transferase activity, transferring hexosyl groups</a>  | RT | 7     | 1.2E-1  | 1.0E0     |
| <input type="checkbox"/> | SP_PIR_KEYWORDS | <a href="#">golgi apparatus</a>                                    | RT | 14    | 1.2E-1  | 9.3E-1    |
| <input type="checkbox"/> | GOTERM_BP_ALL   | <a href="#">biopolymer glycosylation</a>                           | RT | 5     | 1.2E-1  | 9.7E-1    |
| <input type="checkbox"/> | GOTERM_BP_ALL   | <a href="#">glycoprotein biosynthetic process</a>                  | RT | 5     | 1.5E-1  | 9.8E-1    |
| <input type="checkbox"/> | UP_SEQ_FEATURE  | topological domain:Luminal                                         | RT | 8     | 3.5E-1  | 1.0E0     |
| <input type="checkbox"/> | GOTERM_CC_ALL   | <a href="#">Golgi apparatus</a>                                    | RT | 14    | 4.6E-1  | 1.0E0     |
| Annotation Cluster 27    |                 | Enrichment Score: 1.01                                             | G  |       |         |           |
| <input type="checkbox"/> | GOTERM_BP_ALL   | <a href="#">developmental process</a>                              | RT | 80    | 2.0E-2  | 7.4E-1    |
| <input type="checkbox"/> | GOTERM_BP_ALL   | <a href="#">cellular developmental process</a>                     | RT | 50    | 6.7E-2  | 9.2E-1    |
| <input type="checkbox"/> | GOTERM_BP_ALL   | <a href="#">cell differentiation</a>                               | RT | 50    | 6.7E-2  | 9.2E-1    |
| <input type="checkbox"/> | GOTERM_BP_ALL   | <a href="#">anatomical structure development</a>                   | RT | 54    | 8.2E-2  | 9.4E-1    |
| <input type="checkbox"/> | GOTERM_BP_ALL   | <a href="#">organ development</a>                                  | RT | 39    | 9.0E-2  | 9.5E-1    |
| <input type="checkbox"/> | GOTERM_BP_ALL   | <a href="#">system development</a>                                 | RT | 46    | 1.1E-1  | 9.7E-1    |
| <input type="checkbox"/> | GOTERM_BP_ALL   | <a href="#">anatomical structure morphogenesis</a>                 | RT | 31    | 2.0E-1  | 9.9E-1    |

| <input type="checkbox"/> | GOTERM_BP_ALL         | <a href="#">multicellular organismal process</a>                         | <a href="#">RT</a> |  |  |  |  | 69    | 2.3E-1  | 9.9E-1    |
|--------------------------|-----------------------|--------------------------------------------------------------------------|--------------------|--|--|--|--|-------|---------|-----------|
| <input type="checkbox"/> | GOTERM_BP_ALL         | <a href="#">multicellular organismal development</a>                     | <a href="#">RT</a> |  |  |  |  | 54    | 2.5E-1  | 1.0E0     |
|                          | Annotation Cluster 28 | Enrichment Score: 0.99                                                   | <b>G</b>           |  |  |  |  | Count | P_Value | Benjamini |
| <input type="checkbox"/> | SP_PIR_KEYWORDS       | <a href="#">collagen degradation</a>                                     | <a href="#">RT</a> |  |  |  |  | 3     | 5.0E-2  | 8.9E-1    |
| <input type="checkbox"/> | GOTERM_BP_ALL         | <a href="#">multicellular organismal macromolecule catabolic process</a> | <a href="#">RT</a> |  |  |  |  | 3     | 6.2E-2  | 9.2E-1    |
| <input type="checkbox"/> | GOTERM_BP_ALL         | <a href="#">multicellular organismal protein metabolic process</a>       | <a href="#">RT</a> |  |  |  |  | 3     | 6.2E-2  | 9.2E-1    |
| <input type="checkbox"/> | GOTERM_BP_ALL         | <a href="#">collagen catabolic process</a>                               | <a href="#">RT</a> |  |  |  |  | 3     | 6.2E-2  | 9.2E-1    |
| <input type="checkbox"/> | GOTERM_BP_ALL         | <a href="#">protein digestion</a>                                        | <a href="#">RT</a> |  |  |  |  | 3     | 6.2E-2  | 9.2E-1    |
| <input type="checkbox"/> | GOTERM_BP_ALL         | <a href="#">multicellular organismal macromolecule metabolic process</a> | <a href="#">RT</a> |  |  |  |  | 3     | 6.2E-2  | 9.2E-1    |
| <input type="checkbox"/> | GOTERM_BP_ALL         | <a href="#">multicellular organismal protein catabolic process</a>       | <a href="#">RT</a> |  |  |  |  | 3     | 6.2E-2  | 9.2E-1    |
| <input type="checkbox"/> | GOTERM_BP_ALL         | <a href="#">collagen metabolic process</a>                               | <a href="#">RT</a> |  |  |  |  | 3     | 6.8E-2  | 9.2E-1    |
| <input type="checkbox"/> | GOTERM_BP_ALL         | <a href="#">multicellular organismal catabolic process</a>               | <a href="#">RT</a> |  |  |  |  | 3     | 6.8E-2  | 9.2E-1    |
| <input type="checkbox"/> | GOTERM_BP_ALL         | <a href="#">multicellular organismal metabolic process</a>               | <a href="#">RT</a> |  |  |  |  | 3     | 9.4E-2  | 9.6E-1    |
| <input type="checkbox"/> | GOTERM_BP_ALL         | <a href="#">digestion</a>                                                | <a href="#">RT</a> |  |  |  |  | 3     | 2.8E-1  | 1.0E0     |
| <input type="checkbox"/> | GOTERM_BP_ALL         | <a href="#">biopolymer catabolic process</a>                             | <a href="#">RT</a> |  |  |  |  | 7     | 5.3E-1  | 1.0E0     |
| <input type="checkbox"/> | GOTERM_BP_ALL         | <a href="#">protein catabolic process</a>                                | <a href="#">RT</a> |  |  |  |  | 5     | 6.5E-1  | 1.0E0     |
|                          | Annotation Cluster 29 | Enrichment Score: 0.99                                                   | <b>G</b>           |  |  |  |  | Count | P_Value | Benjamini |
| <input type="checkbox"/> | GOTERM_BP_ALL         | <a href="#">nucleotide catabolic process</a>                             | <a href="#">RT</a> |  |  |  |  | 4     | 1.1E-2  | 6.4E-1    |
| <input type="checkbox"/> | GOTERM_BP_ALL         | <a href="#">nucleotide metabolic process</a>                             | <a href="#">RT</a> |  |  |  |  | 7     | 2.8E-1  | 1.0E0     |
| <input type="checkbox"/> | GOTERM_BP_ALL         | <a href="#">nucleobase, nucleoside and nucleotide metabolic process</a>  | <a href="#">RT</a> |  |  |  |  | 7     | 3.3E-1  | 1.0E0     |
|                          | Annotation Cluster 30 | Enrichment Score: 0.99                                                   | <b>G</b>           |  |  |  |  | Count | P_Value | Benjamini |
| <input type="checkbox"/> | GOTERM_BP_ALL         | <a href="#">protein modification process</a>                             | <a href="#">RT</a> |  |  |  |  | 47    | 2.2E-2  | 7.8E-1    |
| <input type="checkbox"/> | GOTERM_BP_ALL         | <a href="#">cellular macromolecule metabolic process</a>                 | <a href="#">RT</a> |  |  |  |  | 79    | 3.2E-2  | 8.3E-1    |
| <input type="checkbox"/> | GOTERM_BP_ALL         | <a href="#">biopolymer modification</a>                                  | <a href="#">RT</a> |  |  |  |  | 47    | 4.0E-2  | 8.6E-1    |
| <input type="checkbox"/> | GOTERM_BP_ALL         | <a href="#">protein metabolic process</a>                                | <a href="#">RT</a> |  |  |  |  | 80    | 4.6E-2  | 8.8E-1    |
| <input type="checkbox"/> | GOTERM_BP_ALL         | <a href="#">cellular protein metabolic process</a>                       | <a href="#">RT</a> |  |  |  |  | 75    | 7.6E-2  | 9.4E-1    |
| <input type="checkbox"/> | GOTERM_MF_ALL         | <a href="#">catalytic activity</a>                                       | <a href="#">RT</a> |  |  |  |  | 126   | 8.6E-2  | 1.0E0     |
| <input type="checkbox"/> | GOTERM_BP_ALL         | <a href="#">metabolic process</a>                                        | <a href="#">RT</a> |  |  |  |  | 172   | 1.7E-1  | 9.9E-1    |
| <input type="checkbox"/> | GOTERM_BP_ALL         | <a href="#">primary metabolic process</a>                                | <a href="#">RT</a> |  |  |  |  | 155   | 2.0E-1  | 9.9E-1    |
| <input type="checkbox"/> | GOTERM_BP_ALL         | <a href="#">cellular metabolic process</a>                               | <a href="#">RT</a> |  |  |  |  | 153   | 2.8E-1  | 1.0E0     |
| <input type="checkbox"/> | GOTERM_BP_ALL         | <a href="#">macromolecule metabolic process</a>                          | <a href="#">RT</a> |  |  |  |  | 133   | 3.3E-1  | 1.0E0     |
| <input type="checkbox"/> | GOTERM_BP_ALL         | <a href="#">biopolymer metabolic process</a>                             | <a href="#">RT</a> |  |  |  |  | 97    | 5.5E-1  | 1.0E0     |
|                          | Annotation Cluster 31 | Enrichment Score: 0.95                                                   | <b>G</b>           |  |  |  |  | Count | P_Value | Benjamini |
| <input type="checkbox"/> | UP_SEQ_FEATURE        | propeptide:Activation peptide                                            | <a href="#">RT</a> |  |  |  |  | 7     | 2.0E-3  | 1.0E0     |
| <input type="checkbox"/> | SP_PIR_KEYWORDS       | <a href="#">Zymogen</a>                                                  | <a href="#">RT</a> |  |  |  |  | 10    | 1.8E-2  | 7.4E-1    |
| <input type="checkbox"/> | SP_PIR_KEYWORDS       | <a href="#">hydrolase</a>                                                | <a href="#">RT</a> |  |  |  |  | 35    | 1.1E-1  | 9.4E-1    |
| <input type="checkbox"/> | SP_PIR_KEYWORDS       | <a href="#">protease</a>                                                 | <a href="#">RT</a> |  |  |  |  | 15    | 1.3E-1  | 9.4E-1    |
| <input type="checkbox"/> | GOTERM_MF_ALL         | <a href="#">endopeptidase activity</a>                                   | <a href="#">RT</a> |  |  |  |  | 13    | 2.5E-1  | 1.0E0     |
| <input type="checkbox"/> | GOTERM_BP_ALL         | <a href="#">proteolysis</a>                                              | <a href="#">RT</a> |  |  |  |  | 18    | 3.7E-1  | 1.0E0     |
| <input type="checkbox"/> | GOTERM_MF_ALL         | <a href="#">peptidase activity</a>                                       | <a href="#">RT</a> |  |  |  |  | 15    | 6.3E-1  | 1.0E0     |
| <input type="checkbox"/> | GOTERM_MF_ALL         | <a href="#">hydrolase activity</a>                                       | <a href="#">RT</a> |  |  |  |  | 43    | 7.8E-1  | 1.0E0     |
|                          | Annotation Cluster 32 | Enrichment Score: 0.9                                                    | <b>G</b>           |  |  |  |  | Count | P_Value | Benjamini |
| <input type="checkbox"/> | SP_PIR_KEYWORDS       | <a href="#">antimicrobial</a>                                            | <a href="#">RT</a> |  |  |  |  | 4     | 7.0E-2  | 9.0E-1    |
| <input type="checkbox"/> | GOTERM_BP_ALL         | <a href="#">response to other organism</a>                               | <a href="#">RT</a> |  |  |  |  | 7     | 9.6E-2  | 9.6E-1    |
| <input type="checkbox"/> | GOTERM_BP_ALL         | <a href="#">response to bacterium</a>                                    | <a href="#">RT</a> |  |  |  |  | 5     | 1.2E-1  | 9.7E-1    |
| <input type="checkbox"/> | GOTERM_BP_ALL         | <a href="#">response to biotic stimulus</a>                              | <a href="#">RT</a> |  |  |  |  | 9     | 1.3E-1  | 9.7E-1    |
| <input type="checkbox"/> | GOTERM_BP_ALL         | <a href="#">defense response to bacterium</a>                            | <a href="#">RT</a> |  |  |  |  | 4     | 1.5E-1  | 9.8E-1    |
| <input type="checkbox"/> | SP_PIR_KEYWORDS       | <a href="#">antibiotic</a>                                               | <a href="#">RT</a> |  |  |  |  | 3     | 1.8E-1  | 9.7E-1    |

| <input type="checkbox"/> |                       |                                                                        |                        |  |          |  |  |  |       |         |           |
|--------------------------|-----------------------|------------------------------------------------------------------------|------------------------|--|----------|--|--|--|-------|---------|-----------|
| <input type="checkbox"/> | GOTERM_BP_ALL         | <a href="#">multi-organism process</a>                                 | RT                     |  |          |  |  |  | 8     | 1.9E-1  | 9.9E-1    |
|                          | Annotation Cluster 33 |                                                                        | Enrichment Score: 0.89 |  | <b>G</b> |  |  |  | Count | P_Value | Benjamini |
| <input type="checkbox"/> | GOTERM_BP_ALL         | <a href="#">cell proliferation</a>                                     | RT                     |  |          |  |  |  | 19    | 5.5E-2  | 9.1E-1    |
| <input type="checkbox"/> | GOTERM_BP_ALL         | <a href="#">positive regulation of cell proliferation</a>              | RT                     |  |          |  |  |  | 8     | 1.8E-1  | 9.9E-1    |
| <input type="checkbox"/> | GOTERM_BP_ALL         | <a href="#">regulation of cell proliferation</a>                       | RT                     |  |          |  |  |  | 12    | 2.2E-1  | 9.9E-1    |
|                          | Annotation Cluster 34 |                                                                        | Enrichment Score: 0.89 |  | <b>G</b> |  |  |  | Count | P_Value | Benjamini |
| <input type="checkbox"/> | GOTERM_MF_ALL         | <a href="#">profilin binding</a>                                       | RT                     |  |          |  |  |  | 3     | 9.2E-3  | 8.5E-1    |
| <input type="checkbox"/> | GOTERM_BP_ALL         | <a href="#">actin polymerization and/or depolymerization</a>           | RT                     |  |          |  |  |  | 5     | 2.2E-2  | 7.6E-1    |
| <input type="checkbox"/> | GOTERM_BP_ALL         | <a href="#">actin filament-based process</a>                           | RT                     |  |          |  |  |  | 9     | 7.7E-2  | 9.4E-1    |
| <input type="checkbox"/> | GOTERM_BP_ALL         | <a href="#">actin cytoskeleton organization and biogenesis</a>         | RT                     |  |          |  |  |  | 8     | 1.3E-1  | 9.8E-1    |
| <input type="checkbox"/> | GOTERM_CC_ALL         | <a href="#">focal adhesion</a>                                         | RT                     |  |          |  |  |  | 3     | 1.4E-1  | 1.0E0     |
| <input type="checkbox"/> | GOTERM_CC_ALL         | <a href="#">adherens junction</a>                                      | RT                     |  |          |  |  |  | 4     | 1.7E-1  | 1.0E0     |
| <input type="checkbox"/> | GOTERM_CC_ALL         | <a href="#">cell-substrate adherens junction</a>                       | RT                     |  |          |  |  |  | 3     | 1.7E-1  | 1.0E0     |
| <input type="checkbox"/> | GOTERM_CC_ALL         | <a href="#">cell-matrix junction</a>                                   | RT                     |  |          |  |  |  | 3     | 2.0E-1  | 1.0E0     |
| <input type="checkbox"/> | GOTERM_CC_ALL         | <a href="#">basolateral plasma membrane</a>                            | RT                     |  |          |  |  |  | 4     | 2.4E-1  | 1.0E0     |
| <input type="checkbox"/> | SP_PIR_KEYWORDS       | <a href="#">actin-binding</a>                                          | RT                     |  |          |  |  |  | 5     | 5.1E-1  | 1.0E0     |
| <input type="checkbox"/> | GOTERM_CC_ALL         | <a href="#">cell junction</a>                                          | RT                     |  |          |  |  |  | 7     | 8.3E-1  | 1.0E0     |
|                          | Annotation Cluster 35 |                                                                        | Enrichment Score: 0.89 |  | <b>G</b> |  |  |  | Count | P_Value | Benjamini |
| <input type="checkbox"/> | UP_SEQ_FEATURE        | domain:SET                                                             | RT                     |  |          |  |  |  | 3     | 4.1E-2  | 1.0E0     |
| <input type="checkbox"/> | INTERPRO              | <a href="#">SET</a>                                                    | RT                     |  |          |  |  |  | 3     | 2.3E-1  | 1.0E0     |
| <input type="checkbox"/> | SMART                 | <a href="#">SET</a>                                                    | RT                     |  |          |  |  |  | 3     | 2.4E-1  | 1.0E0     |
|                          | Annotation Cluster 36 |                                                                        | Enrichment Score: 0.88 |  | <b>G</b> |  |  |  | Count | P_Value | Benjamini |
| <input type="checkbox"/> | GOTERM_BP_ALL         | <a href="#">histone modification</a>                                   | RT                     |  |          |  |  |  | 4     | 7.3E-2  | 9.3E-1    |
| <input type="checkbox"/> | GOTERM_BP_ALL         | <a href="#">covalent chromatin modification</a>                        | RT                     |  |          |  |  |  | 4     | 8.9E-2  | 9.5E-1    |
| <input type="checkbox"/> | SP_PIR_KEYWORDS       | <a href="#">bromodomain</a>                                            | RT                     |  |          |  |  |  | 3     | 1.3E-1  | 9.4E-1    |
| <input type="checkbox"/> | INTERPRO              | <a href="#">Bromodomain</a>                                            | RT                     |  |          |  |  |  | 3     | 1.9E-1  | 1.0E0     |
| <input type="checkbox"/> | SMART                 | <a href="#">BROMO</a>                                                  | RT                     |  |          |  |  |  | 3     | 2.3E-1  | 1.0E0     |
|                          | Annotation Cluster 37 |                                                                        | Enrichment Score: 0.88 |  | <b>G</b> |  |  |  | Count | P_Value | Benjamini |
| <input type="checkbox"/> | GOTERM_BP_ALL         | <a href="#">menstrual cycle phase</a>                                  | RT                     |  |          |  |  |  | 4     | 3.9E-2  | 8.6E-1    |
| <input type="checkbox"/> | GOTERM_BP_ALL         | <a href="#">menstrual cycle process</a>                                | RT                     |  |          |  |  |  | 4     | 4.2E-2  | 8.6E-1    |
| <input type="checkbox"/> | GOTERM_BP_ALL         | <a href="#">female gonad development</a>                               | RT                     |  |          |  |  |  | 4     | 5.8E-2  | 9.2E-1    |
| <input type="checkbox"/> | GOTERM_BP_ALL         | <a href="#">development of primary female sexual characteristics</a>   | RT                     |  |          |  |  |  | 4     | 6.5E-2  | 9.2E-1    |
| <input type="checkbox"/> | GOTERM_BP_ALL         | <a href="#">female sex differentiation</a>                             | RT                     |  |          |  |  |  | 4     | 6.5E-2  | 9.2E-1    |
| <input type="checkbox"/> | GOTERM_BP_ALL         | <a href="#">menstrual cycle</a>                                        | RT                     |  |          |  |  |  | 4     | 6.9E-2  | 9.2E-1    |
| <input type="checkbox"/> | GOTERM_BP_ALL         | <a href="#">rhythmic process</a>                                       | RT                     |  |          |  |  |  | 5     | 1.0E-1  | 9.6E-1    |
| <input type="checkbox"/> | GOTERM_BP_ALL         | <a href="#">gonad development</a>                                      | RT                     |  |          |  |  |  | 4     | 1.4E-1  | 9.8E-1    |
| <input type="checkbox"/> | GOTERM_BP_ALL         | <a href="#">reproductive structure development</a>                     | RT                     |  |          |  |  |  | 4     | 1.5E-1  | 9.8E-1    |
| <input type="checkbox"/> | GOTERM_BP_ALL         | <a href="#">development of primary sexual characteristics</a>          | RT                     |  |          |  |  |  | 4     | 1.8E-1  | 9.9E-1    |
| <input type="checkbox"/> | GOTERM_BP_ALL         | <a href="#">multicellular organism reproduction</a>                    | RT                     |  |          |  |  |  | 4     | 2.3E-1  | 9.9E-1    |
| <input type="checkbox"/> | GOTERM_BP_ALL         | <a href="#">reproductive process in a multicellular organism</a>       | RT                     |  |          |  |  |  | 4     | 2.3E-1  | 9.9E-1    |
| <input type="checkbox"/> | GOTERM_BP_ALL         | <a href="#">sex differentiation</a>                                    | RT                     |  |          |  |  |  | 4     | 3.2E-1  | 1.0E0     |
| <input type="checkbox"/> | GOTERM_BP_ALL         | <a href="#">reproductive developmental process</a>                     | RT                     |  |          |  |  |  | 4     | 3.7E-1  | 1.0E0     |
| <input type="checkbox"/> | GOTERM_BP_ALL         | <a href="#">reproductive process</a>                                   | RT                     |  |          |  |  |  | 4     | 8.9E-1  | 1.0E0     |
|                          | Annotation Cluster 38 |                                                                        | Enrichment Score: 0.87 |  | <b>G</b> |  |  |  | Count | P_Value | Benjamini |
| <input type="checkbox"/> | GOTERM_MF_ALL         | <a href="#">diacylglycerol binding</a>                                 | RT                     |  |          |  |  |  | 4     | 1.0E-1  | 1.0E0     |
| <input type="checkbox"/> | INTERPRO              | <a href="#">Protein kinase C, phorbol ester/diacylglycerol binding</a> | RT                     |  |          |  |  |  | 4     | 1.5E-1  | 1.0E0     |
| <input type="checkbox"/> | SMART                 | <a href="#">C1</a>                                                     | RT                     |  |          |  |  |  | 4     | 1.6E-1  | 1.0E0     |
|                          | Annotation Cluster 39 |                                                                        | Enrichment Score: 0.86 |  | <b>G</b> |  |  |  | Count | P_Value | Benjamini |

|                          |                 |                                                                                          |                        |          |    |        |         |           |
|--------------------------|-----------------|------------------------------------------------------------------------------------------|------------------------|----------|----|--------|---------|-----------|
| <input type="checkbox"/> | GOTERM_BP_ALL   | <a href="#">chromatin modification</a>                                                   | <a href="#">RT</a>     |          | 10 | 1.7E-2 | 7.2E-1  |           |
| <input type="checkbox"/> | GOTERM_BP_ALL   | <a href="#">establishment and/or maintenance of chromatin architecture</a>               | <a href="#">RT</a>     |          | 11 | 4.1E-2 | 8.6E-1  |           |
| <input type="checkbox"/> | GOTERM_BP_ALL   | <a href="#">DNA packaging</a>                                                            | <a href="#">RT</a>     |          | 11 | 4.8E-2 | 8.9E-1  |           |
| <input type="checkbox"/> | GOTERM_BP_ALL   | <a href="#">chromosome organization and biogenesis</a>                                   | <a href="#">RT</a>     |          | 12 | 9.3E-2 | 9.6E-1  |           |
| <input type="checkbox"/> | INTERPRO        | <a href="#">Zinc finger, PHD-type</a>                                                    | <a href="#">RT</a>     |          | 4  | 2.6E-1 | 1.0E0   |           |
| <input type="checkbox"/> | GOTERM_BP_ALL   | <a href="#">organelle organization and biogenesis</a>                                    | <a href="#">RT</a>     |          | 28 | 2.9E-1 | 1.0E0   |           |
| <input type="checkbox"/> | SMART           | <a href="#">PHD</a>                                                                      | <a href="#">RT</a>     |          | 4  | 3.0E-1 | 1.0E0   |           |
| <input type="checkbox"/> | SP_PIR_KEYWORDS | <a href="#">Chromatin regulator</a>                                                      | <a href="#">RT</a>     |          | 4  | 3.8E-1 | 1.0E0   |           |
| <input type="checkbox"/> | GOTERM_BP_ALL   | <a href="#">DNA metabolic process</a>                                                    | <a href="#">RT</a>     |          | 13 | 7.0E-1 | 1.0E0   |           |
|                          |                 | Annotation Cluster 40                                                                    | Enrichment Score: 0.85 | <b>G</b> |    | Count  | P_Value | Benjamini |
| <input type="checkbox"/> | GOTERM_BP_ALL   | <a href="#">regulation of multicellular organism growth</a>                              | <a href="#">RT</a>     |          | 4  | 1.1E-1 | 9.6E-1  |           |
| <input type="checkbox"/> | GOTERM_BP_ALL   | <a href="#">multicellular organism growth</a>                                            | <a href="#">RT</a>     |          | 4  | 1.4E-1 | 9.8E-1  |           |
| <input type="checkbox"/> | GOTERM_BP_ALL   | <a href="#">regulation of growth</a>                                                     | <a href="#">RT</a>     |          | 7  | 1.8E-1 | 9.9E-1  |           |
|                          |                 | Annotation Cluster 41                                                                    | Enrichment Score: 0.84 | <b>G</b> |    | Count  | P_Value | Benjamini |
| <input type="checkbox"/> | INTERPRO        | <a href="#">Zinc finger, RING/FYVE/PHD-type</a>                                          | <a href="#">RT</a>     |          | 8  | 5.3E-2 | 1.0E0   |           |
| <input type="checkbox"/> | INTERPRO        | <a href="#">Zinc finger, RING-type</a>                                                   | <a href="#">RT</a>     |          | 9  | 1.4E-1 | 1.0E0   |           |
| <input type="checkbox"/> | SMART           | <a href="#">RING</a>                                                                     | <a href="#">RT</a>     |          | 9  | 2.1E-1 | 1.0E0   |           |
| <input type="checkbox"/> | UP_SEQ_FEATURE  | zinc finger region:RING-type                                                             | <a href="#">RT</a>     |          | 5  | 2.7E-1 | 1.0E0   |           |
|                          |                 | Annotation Cluster 42                                                                    | Enrichment Score: 0.84 | <b>G</b> |    | Count  | P_Value | Benjamini |
| <input type="checkbox"/> | GOTERM_BP_ALL   | <a href="#">platelet activation</a>                                                      | <a href="#">RT</a>     |          | 3  | 3.6E-2 | 8.4E-1  |           |
| <input type="checkbox"/> | GOTERM_BP_ALL   | <a href="#">blood coagulation</a>                                                        | <a href="#">RT</a>     |          | 4  | 1.4E-1 | 9.8E-1  |           |
| <input type="checkbox"/> | GOTERM_BP_ALL   | <a href="#">coagulation</a>                                                              | <a href="#">RT</a>     |          | 4  | 1.4E-1 | 9.8E-1  |           |
| <input type="checkbox"/> | GOTERM_BP_ALL   | <a href="#">hemostasis</a>                                                               | <a href="#">RT</a>     |          | 4  | 1.5E-1 | 9.8E-1  |           |
| <input type="checkbox"/> | GOTERM_BP_ALL   | <a href="#">regulation of body fluid levels</a>                                          | <a href="#">RT</a>     |          | 4  | 2.5E-1 | 1.0E0   |           |
| <input type="checkbox"/> | GOTERM_BP_ALL   | <a href="#">wound healing</a>                                                            | <a href="#">RT</a>     |          | 4  | 3.3E-1 | 1.0E0   |           |
|                          |                 | Annotation Cluster 43                                                                    | Enrichment Score: 0.83 | <b>G</b> |    | Count  | P_Value | Benjamini |
| <input type="checkbox"/> | INTERPRO        | <a href="#">Basic-leucine zipper (bZIP) transcription factor</a>                         | <a href="#">RT</a>     |          | 4  | 9.6E-2 | 1.0E0   |           |
| <input type="checkbox"/> | SMART           | <a href="#">BRLZ</a>                                                                     | <a href="#">RT</a>     |          | 4  | 1.2E-1 | 1.0E0   |           |
| <input type="checkbox"/> | UP_SEQ_FEATURE  | domain:Leucine-zipper                                                                    | <a href="#">RT</a>     |          | 5  | 1.5E-1 | 1.0E0   |           |
| <input type="checkbox"/> | GOTERM_MF_ALL   | <a href="#">protein dimerization activity</a>                                            | <a href="#">RT</a>     |          | 10 | 1.6E-1 | 1.0E0   |           |
| <input type="checkbox"/> | UP_SEQ_FEATURE  | DNA-binding region:Basic motif                                                           | <a href="#">RT</a>     |          | 5  | 2.7E-1 | 1.0E0   |           |
|                          |                 | Annotation Cluster 44                                                                    | Enrichment Score: 0.81 | <b>G</b> |    | Count  | P_Value | Benjamini |
| <input type="checkbox"/> | KEGG_PATHWAY    | <a href="#">TGF-beta signaling pathway</a>                                               | <a href="#">RT</a>     |          | 7  | 2.5E-2 | 8.3E-1  |           |
| <input type="checkbox"/> | GOTERM_BP_ALL   | <a href="#">regionalization</a>                                                          | <a href="#">RT</a>     |          | 8  | 4.0E-2 | 8.6E-1  |           |
| <input type="checkbox"/> | GOTERM_BP_ALL   | <a href="#">transmembrane receptor protein serine/threonine kinase signaling pathway</a> | <a href="#">RT</a>     |          | 5  | 1.2E-1 | 9.7E-1  |           |
| <input type="checkbox"/> | GOTERM_BP_ALL   | <a href="#">mesoderm formation</a>                                                       | <a href="#">RT</a>     |          | 3  | 1.3E-1 | 9.8E-1  |           |
| <input type="checkbox"/> | GOTERM_BP_ALL   | <a href="#">pattern specification process</a>                                            | <a href="#">RT</a>     |          | 9  | 1.4E-1 | 9.8E-1  |           |
| <input type="checkbox"/> | GOTERM_BP_ALL   | <a href="#">mesoderm morphogenesis</a>                                                   | <a href="#">RT</a>     |          | 3  | 1.4E-1 | 9.8E-1  |           |
| <input type="checkbox"/> | GOTERM_BP_ALL   | <a href="#">gastrulation</a>                                                             | <a href="#">RT</a>     |          | 4  | 1.4E-1 | 9.8E-1  |           |
| <input type="checkbox"/> | GOTERM_BP_ALL   | <a href="#">formation of primary germ layer</a>                                          | <a href="#">RT</a>     |          | 3  | 1.5E-1 | 9.8E-1  |           |
| <input type="checkbox"/> | GOTERM_BP_ALL   | <a href="#">dorsal/ventral pattern formation</a>                                         | <a href="#">RT</a>     |          | 3  | 2.4E-1 | 9.9E-1  |           |
| <input type="checkbox"/> | GOTERM_BP_ALL   | <a href="#">urogenital system development</a>                                            | <a href="#">RT</a>     |          | 4  | 2.6E-1 | 1.0E0   |           |
| <input type="checkbox"/> | GOTERM_BP_ALL   | <a href="#">mesoderm development</a>                                                     | <a href="#">RT</a>     |          | 3  | 3.1E-1 | 1.0E0   |           |
| <input type="checkbox"/> | GOTERM_BP_ALL   | <a href="#">kidney development</a>                                                       | <a href="#">RT</a>     |          | 3  | 4.8E-1 | 1.0E0   |           |
| <input type="checkbox"/> | GOTERM_BP_ALL   | <a href="#">tissue morphogenesis</a>                                                     | <a href="#">RT</a>     |          | 3  | 5.1E-1 | 1.0E0   |           |
|                          |                 | Annotation Cluster 45                                                                    | Enrichment Score: 0.8  | <b>G</b> |    | Count  | P_Value | Benjamini |
| <input type="checkbox"/> | GOTERM_BP_ALL   | <a href="#">myeloid cell differentiation</a>                                             | <a href="#">RT</a>     |          | 9  | 3.1E-3 | 3.9E-1  |           |
| <input type="checkbox"/> | GOTERM_BP_ALL   | <a href="#">regulation of myeloid cell differentiation</a>                               | <a href="#">RT</a>     |          | 6  | 3.3E-3 | 3.9E-1  |           |
| <input type="checkbox"/> | GOTERM_BP_ALL   | <a href="#">cell activation</a>                                                          | <a href="#">RT</a>     |          | 11 | 4.8E-2 | 8.9E-1  |           |



|                          |                 |                                                                                  |    |  |       |         |           |
|--------------------------|-----------------|----------------------------------------------------------------------------------|----|--|-------|---------|-----------|
| <input type="checkbox"/> | GOTERM_BP_ALL   | <a href="#">regulation of T cell activation</a>                                  | RT |  | 5     | 9.4E-2  | 9.5E-1    |
| <input type="checkbox"/> | GOTERM_BP_ALL   | <a href="#">positive regulation of T cell activation</a>                         | RT |  | 4     | 1.1E-1  | 9.6E-1    |
| <input type="checkbox"/> | GOTERM_BP_ALL   | <a href="#">T cell proliferation</a>                                             | RT |  | 4     | 1.6E-1  | 9.9E-1    |
| <input type="checkbox"/> | GOTERM_BP_ALL   | <a href="#">positive regulation of T cell proliferation</a>                      | RT |  | 3     | 1.7E-1  | 9.9E-1    |
| <input type="checkbox"/> | GOTERM_BP_ALL   | <a href="#">positive regulation of cell proliferation</a>                        | RT |  | 8     | 1.8E-1  | 9.9E-1    |
| <input type="checkbox"/> | GOTERM_BP_ALL   | <a href="#">regulation of lymphocyte activation</a>                              | RT |  | 5     | 1.8E-1  | 9.9E-1    |
| <input type="checkbox"/> | GOTERM_BP_ALL   | <a href="#">T cell activation</a>                                                | RT |  | 6     | 1.9E-1  | 9.9E-1    |
| <input type="checkbox"/> | GOTERM_BP_ALL   | <a href="#">anti-apoptosis</a>                                                   | RT |  | 5     | 1.9E-1  | 9.9E-1    |
| <input type="checkbox"/> | GOTERM_BP_ALL   | <a href="#">positive regulation of lymphocyte activation</a>                     | RT |  | 4     | 2.0E-1  | 9.9E-1    |
| <input type="checkbox"/> | GOTERM_BP_ALL   | <a href="#">regulation of cell activation</a>                                    | RT |  | 5     | 2.0E-1  | 9.9E-1    |
| <input type="checkbox"/> | GOTERM_BP_ALL   | <a href="#">positive regulation of lymphocyte proliferation</a>                  | RT |  | 3     | 2.5E-1  | 1.0E0     |
| <input type="checkbox"/> | GOTERM_BP_ALL   | <a href="#">positive regulation of mononuclear cell proliferation</a>            | RT |  | 3     | 2.5E-1  | 1.0E0     |
| <input type="checkbox"/> | GOTERM_BP_ALL   | <a href="#">leukocyte activation</a>                                             | RT |  | 8     | 2.5E-1  | 1.0E0     |
| <input type="checkbox"/> | GOTERM_BP_ALL   | <a href="#">lymphocyte proliferation</a>                                         | RT |  | 4     | 3.0E-1  | 1.0E0     |
| <input type="checkbox"/> | GOTERM_BP_ALL   | <a href="#">mononuclear cell proliferation</a>                                   | RT |  | 4     | 3.0E-1  | 1.0E0     |
| <input type="checkbox"/> | GOTERM_BP_ALL   | <a href="#">regulation of T cell proliferation</a>                               | RT |  | 3     | 3.0E-1  | 1.0E0     |
| <input type="checkbox"/> | GOTERM_BP_ALL   | <a href="#">lymphocyte activation</a>                                            | RT |  | 7     | 3.3E-1  | 1.0E0     |
| <input type="checkbox"/> | GOTERM_BP_ALL   | <a href="#">regulation of lymphocyte proliferation</a>                           | RT |  | 3     | 4.0E-1  | 1.0E0     |
| <input type="checkbox"/> | GOTERM_BP_ALL   | <a href="#">regulation of mononuclear cell proliferation</a>                     | RT |  | 3     | 4.0E-1  | 1.0E0     |
| <input type="checkbox"/> | GOTERM_BP_ALL   | <a href="#">leukocyte differentiation</a>                                        | RT |  | 4     | 6.5E-1  | 1.0E0     |
| <input type="checkbox"/> | GOTERM_BP_ALL   | <a href="#">lymphocyte differentiation</a>                                       | RT |  | 3     | 6.9E-1  | 1.0E0     |
| Annotation Cluster 46    |                 | Enrichment Score: 0.77                                                           | G  |  | Count | P_Value | Benjamini |
| <input type="checkbox"/> | PIR_SUPERFAMILY | PIRSF000615:tyrosine-protein kinase, CSF-1/PDGF receptor type                    | RT |  | 3     | 8.5E-3  | 1.0E0     |
| <input type="checkbox"/> | INTERPRO        | <a href="#">Receptor tyrosine kinase, class III, conserved region</a>            | RT |  | 3     | 1.9E-2  | 1.0E0     |
| <input type="checkbox"/> | SP_PIR_KEYWORDS | <a href="#">proto-oncogene</a>                                                   | RT |  | 6     | 3.8E-2  | 8.5E-1    |
| <input type="checkbox"/> | SP_PIR_KEYWORDS | <a href="#">autophosphorylation</a>                                              | RT |  | 4     | 6.3E-2  | 8.9E-1    |
| <input type="checkbox"/> | GOTERM_BP_ALL   | <a href="#">transmembrane receptor protein tyrosine kinase signaling pathway</a> | RT |  | 8     | 1.3E-1  | 9.8E-1    |
| <input type="checkbox"/> | SP_PIR_KEYWORDS | <a href="#">ATP</a>                                                              | RT |  | 7     | 1.5E-1  | 9.5E-1    |
| <input type="checkbox"/> | INTERPRO        | <a href="#">Tyrosine protein kinase, active site</a>                             | RT |  | 5     | 1.7E-1  | 1.0E0     |
| <input type="checkbox"/> | UP_SEQ_FEATURE  | domain:Ig-like C2-type 3                                                         | RT |  | 4     | 1.8E-1  | 1.0E0     |
| <input type="checkbox"/> | KEGG_PATHWAY    | <a href="#">Hematopoietic cell lineage</a>                                       | RT |  | 5     | 1.8E-1  | 9.3E-1    |
| <input type="checkbox"/> | GOTERM_MF_ALL   | <a href="#">transmembrane receptor protein tyrosine kinase activity</a>          | RT |  | 4     | 2.2E-1  | 1.0E0     |
| <input type="checkbox"/> | SP_PIR_KEYWORDS | <a href="#">tyrosine-protein kinase</a>                                          | RT |  | 5     | 2.3E-1  | 9.8E-1    |
| <input type="checkbox"/> | INTERPRO        | <a href="#">Immunoglobulin subtype 2</a>                                         | RT |  | 6     | 2.7E-1  | 1.0E0     |
| <input type="checkbox"/> | SP_PIR_KEYWORDS | <a href="#">tyrosine-specific protein kinase</a>                                 | RT |  | 3     | 2.7E-1  | 9.9E-1    |
| <input type="checkbox"/> | INTERPRO        | <a href="#">Tyrosine protein kinase</a>                                          | RT |  | 5     | 2.9E-1  | 1.0E0     |
| <input type="checkbox"/> | UP_SEQ_FEATURE  | domain:Ig-like C2-type 1                                                         | RT |  | 4     | 3.2E-1  | 1.0E0     |
| <input type="checkbox"/> | UP_SEQ_FEATURE  | domain:Ig-like C2-type 2                                                         | RT |  | 4     | 3.2E-1  | 1.0E0     |
| <input type="checkbox"/> | SMART           | <a href="#">TyrKc</a>                                                            | RT |  | 5     | 3.3E-1  | 1.0E0     |
| <input type="checkbox"/> | SMART           | <a href="#">IGc2</a>                                                             | RT |  | 6     | 3.4E-1  | 1.0E0     |
| <input type="checkbox"/> | SP_PIR_KEYWORDS | <a href="#">immunoglobulin domain</a>                                            | RT |  | 9     | 4.9E-1  | 1.0E0     |
| <input type="checkbox"/> | INTERPRO        | <a href="#">Immunoglobulin</a>                                                   | RT |  | 5     | 4.9E-1  | 1.0E0     |
| <input type="checkbox"/> | SP_PIR_KEYWORDS | <a href="#">phosphotransferase</a>                                               | RT |  | 4     | 5.4E-1  | 1.0E0     |
| Annotation Cluster 47    |                 | Enrichment Score: 0.73                                                           | G  |  | Count | P_Value | Benjamini |
| <input type="checkbox"/> | INTERPRO        | <a href="#">Zinc finger, ZZ-type</a>                                             | RT |  | 3     | 4.2E-2  | 1.0E0     |
| <input type="checkbox"/> | SMART           | <a href="#">ZnF_ZZ</a>                                                           | RT |  | 3     | 4.4E-2  | 9.9E-1    |

|                          |                 |                                                                                                              |    |          |    |        |        |
|--------------------------|-----------------|--------------------------------------------------------------------------------------------------------------|----|----------|----|--------|--------|
| <input type="checkbox"/> | SP_PIR_KEYWORDS | <a href="#">activator</a>                                                                                    | RT |          | 15 | 5.2E-2 | 8.8E-1 |
| <input type="checkbox"/> | BIOCARTA        | <a href="#">IL-7 Signal Transduction</a>                                                                     | RT |          | 3  | 1.1E-1 | 1.0E0  |
| <input type="checkbox"/> | GOTERM_BP_ALL   | <a href="#">regulation of transcription from RNA polymerase II promoter</a>                                  | RT |          | 13 | 2.1E-1 | 9.9E-1 |
| <input type="checkbox"/> | GOTERM_BP_ALL   | <a href="#">transcription from RNA polymerase II promoter</a>                                                | RT |          | 14 | 2.3E-1 | 9.9E-1 |
| <input type="checkbox"/> | GOTERM_BP_ALL   | <a href="#">positive regulation of cellular metabolic process</a>                                            | RT |          | 13 | 2.4E-1 | 1.0E0  |
| <input type="checkbox"/> | GOTERM_BP_ALL   | <a href="#">positive regulation of transcription, DNA-dependent</a>                                          | RT |          | 9  | 3.0E-1 | 1.0E0  |
| <input type="checkbox"/> | GOTERM_BP_ALL   | <a href="#">positive regulation of metabolic process</a>                                                     | RT |          | 13 | 3.2E-1 | 1.0E0  |
| <input type="checkbox"/> | GOTERM_BP_ALL   | <a href="#">positive regulation of transcription</a>                                                         | RT |          | 9  | 4.9E-1 | 1.0E0  |
| <input type="checkbox"/> | GOTERM_BP_ALL   | <a href="#">positive regulation of nucleobase, nucleoside, nucleotide and nucleic acid metabolic process</a> | RT |          | 9  | 5.0E-1 | 1.0E0  |
| <input type="checkbox"/> | GOTERM_BP_ALL   | <a href="#">positive regulation of transcription from RNA polymerase II promoter</a>                         | RT |          | 6  | 5.5E-1 | 1.0E0  |
| Annotation Cluster 48    |                 | Enrichment Score: 0.72                                                                                       |    | <b>G</b> |    |        |        |
| <input type="checkbox"/> | GOTERM_BP_ALL   | <a href="#">regionalization</a>                                                                              | RT |          | 8  | 4.0E-2 | 8.6E-1 |
| <input type="checkbox"/> | GOTERM_BP_ALL   | <a href="#">pattern specification process</a>                                                                | RT |          | 9  | 1.4E-1 | 9.8E-1 |
| <input type="checkbox"/> | GOTERM_BP_ALL   | <a href="#">protein amino acid alkylation</a>                                                                | RT |          | 3  | 1.7E-1 | 9.9E-1 |
| <input type="checkbox"/> | GOTERM_BP_ALL   | <a href="#">protein amino acid methylation</a>                                                               | RT |          | 3  | 1.7E-1 | 9.9E-1 |
| <input type="checkbox"/> | GOTERM_BP_ALL   | <a href="#">one-carbon compound metabolic process</a>                                                        | RT |          | 4  | 3.1E-1 | 1.0E0  |
| <input type="checkbox"/> | GOTERM_BP_ALL   | <a href="#">anterior/posterior pattern formation</a>                                                         | RT |          | 4  | 3.2E-1 | 1.0E0  |
| <input type="checkbox"/> | GOTERM_BP_ALL   | <a href="#">biopolymer methylation</a>                                                                       | RT |          | 3  | 3.3E-1 | 1.0E0  |
| <input type="checkbox"/> | GOTERM_BP_ALL   | <a href="#">methylation</a>                                                                                  | RT |          | 3  | 3.5E-1 | 1.0E0  |
| Annotation Cluster 49    |                 | Enrichment Score: 0.71                                                                                       |    | <b>G</b> |    |        |        |
| <input type="checkbox"/> | SP_PIR_KEYWORDS | <a href="#">transferase</a>                                                                                  | RT |          | 41 | 1.1E-2 | 6.1E-1 |
| <input type="checkbox"/> | GOTERM_BP_ALL   | <a href="#">protein modification process</a>                                                                 | RT |          | 47 | 2.2E-2 | 7.8E-1 |
| <input type="checkbox"/> | INTERPRO        | <a href="#">Protein kinase, C-terminal</a>                                                                   | RT |          | 5  | 3.0E-2 | 1.0E0  |
| <input type="checkbox"/> | GOTERM_BP_ALL   | <a href="#">cellular macromolecule metabolic process</a>                                                     | RT |          | 79 | 3.2E-2 | 8.3E-1 |
| <input type="checkbox"/> | SMART           | <a href="#">S_TK_X</a>                                                                                       | RT |          | 5  | 3.3E-2 | 9.8E-1 |
| <input type="checkbox"/> | GOTERM_BP_ALL   | <a href="#">enzyme linked receptor protein signaling pathway</a>                                             | RT |          | 13 | 3.4E-2 | 8.4E-1 |
| <input type="checkbox"/> | GOTERM_BP_ALL   | <a href="#">biopolymer modification</a>                                                                      | RT |          | 47 | 4.0E-2 | 8.6E-1 |
| <input type="checkbox"/> | GOTERM_BP_ALL   | <a href="#">protein metabolic process</a>                                                                    | RT |          | 80 | 4.6E-2 | 8.8E-1 |
| <input type="checkbox"/> | SP_PIR_KEYWORDS | <a href="#">kinase</a>                                                                                       | RT |          | 23 | 5.1E-2 | 8.8E-1 |
| <input type="checkbox"/> | GOTERM_MF_ALL   | <a href="#">transferase activity</a>                                                                         | RT |          | 50 | 5.4E-2 | 1.0E0  |
| <input type="checkbox"/> | UP_SEQ_FEATURE  | active site:Proton acceptor                                                                                  | RT |          | 18 | 5.5E-2 | 1.0E0  |
| <input type="checkbox"/> | GOTERM_BP_ALL   | <a href="#">cellular protein metabolic process</a>                                                           | RT |          | 75 | 7.6E-2 | 9.4E-1 |
| <input type="checkbox"/> | UP_SEQ_FEATURE  | domain:AGC-kinase C-terminal                                                                                 | RT |          | 4  | 1.0E-1 | 1.0E0  |
| <input type="checkbox"/> | GOTERM_MF_ALL   | <a href="#">kinase activity</a>                                                                              | RT |          | 25 | 1.5E-1 | 1.0E0  |
| <input type="checkbox"/> | GOTERM_MF_ALL   | <a href="#">protein-tyrosine kinase activity</a>                                                             | RT |          | 11 | 1.6E-1 | 1.0E0  |
| <input type="checkbox"/> | GOTERM_MF_ALL   | <a href="#">protein serine/threonine kinase activity</a>                                                     | RT |          | 15 | 1.7E-1 | 1.0E0  |
| <input type="checkbox"/> | GOTERM_BP_ALL   | <a href="#">protein amino acid phosphorylation</a>                                                           | RT |          | 18 | 2.0E-1 | 9.9E-1 |
| <input type="checkbox"/> | GOTERM_MF_ALL   | <a href="#">transferase activity, transferring phosphorus-containing groups</a>                              | RT |          | 27 | 2.2E-1 | 1.0E0  |
| <input type="checkbox"/> | GOTERM_BP_ALL   | <a href="#">post-translational protein modification</a>                                                      | RT |          | 35 | 2.3E-1 | 9.9E-1 |
| <input type="checkbox"/> | INTERPRO        | <a href="#">Protein kinase, core</a>                                                                         | RT |          | 11 | 2.3E-1 | 1.0E0  |
| <input type="checkbox"/> | GOTERM_MF_ALL   | <a href="#">phosphotransferase activity, alcohol group as acceptor</a>                                       | RT |          | 19 | 2.7E-1 | 1.0E0  |
| <input type="checkbox"/> | UP_SEQ_FEATURE  | domain:Protein kinase                                                                                        | RT |          | 11 | 2.8E-1 | 1.0E0  |
| <input type="checkbox"/> | GOTERM_BP_ALL   | <a href="#">phosphorylation</a>                                                                              | RT |          | 19 | 2.9E-1 | 1.0E0  |
| <input type="checkbox"/> | INTERPRO        | <a href="#">Serine/threonine protein kinase</a>                                                              | RT |          | 7  | 3.1E-1 | 1.0E0  |
| <input type="checkbox"/> | UP_SEQ_FEATURE  | nucleotide phosphate-binding region:ATP                                                                      | RT |          | 17 | 3.2E-1 | 1.0E0  |
| <input type="checkbox"/> | SP_PIR_KEYWORDS | <a href="#">Serine/threonine-protein kinase</a>                                                              | RT |          | 10 | 3.4E-1 | 1.0E0  |

|                          |                 |                                                                              |                    |  |       |         |           |
|--------------------------|-----------------|------------------------------------------------------------------------------|--------------------|--|-------|---------|-----------|
| <input type="checkbox"/> | UP_SEQ_FEATURE  | binding site:ATP                                                             | <a href="#">RT</a> |  | 11    | 3.7E-1  | 1.0E0     |
| <input type="checkbox"/> | SMART           | <a href="#">S_TKc</a>                                                        | <a href="#">RT</a> |  | 10    | 4.2E-1  | 1.0E0     |
| <input type="checkbox"/> | GOTERM_MF_ALL   | <a href="#">protein kinase activity</a>                                      | <a href="#">RT</a> |  | 15    | 4.4E-1  | 1.0E0     |
| <input type="checkbox"/> | INTERPRO        | <a href="#">Serine/threonine protein kinase, active site</a>                 | <a href="#">RT</a> |  | 7     | 4.8E-1  | 1.0E0     |
| <input type="checkbox"/> | GOTERM_BP_ALL   | <a href="#">phosphorus metabolic process</a>                                 | <a href="#">RT</a> |  | 20    | 4.9E-1  | 1.0E0     |
| <input type="checkbox"/> | GOTERM_BP_ALL   | <a href="#">phosphate metabolic process</a>                                  | <a href="#">RT</a> |  | 20    | 4.9E-1  | 1.0E0     |
| <input type="checkbox"/> | SP_PIR_KEYWORDS | <a href="#">atp-binding</a>                                                  | <a href="#">RT</a> |  | 22    | 6.2E-1  | 1.0E0     |
| <input type="checkbox"/> | GOTERM_MF_ALL   | <a href="#">adenyl nucleotide binding</a>                                    | <a href="#">RT</a> |  | 27    | 8.5E-1  | 1.0E0     |
| <input type="checkbox"/> | GOTERM_MF_ALL   | <a href="#">ATP binding</a>                                                  | <a href="#">RT</a> |  | 25    | 8.7E-1  | 1.0E0     |
| <input type="checkbox"/> | SP_PIR_KEYWORDS | <a href="#">nucleotide-binding</a>                                           | <a href="#">RT</a> |  | 24    | 8.7E-1  | 1.0E0     |
| <input type="checkbox"/> | GOTERM_MF_ALL   | <a href="#">adenyl ribonucleotide binding</a>                                | <a href="#">RT</a> |  | 25    | 8.8E-1  | 1.0E0     |
| <input type="checkbox"/> | GOTERM_MF_ALL   | <a href="#">nucleotide binding</a>                                           | <a href="#">RT</a> |  | 35    | 9.4E-1  | 1.0E0     |
| <input type="checkbox"/> | GOTERM_MF_ALL   | <a href="#">purine nucleotide binding</a>                                    | <a href="#">RT</a> |  | 30    | 9.5E-1  | 1.0E0     |
| <input type="checkbox"/> | GOTERM_MF_ALL   | <a href="#">ribonucleotide binding</a>                                       | <a href="#">RT</a> |  | 28    | 9.6E-1  | 1.0E0     |
| <input type="checkbox"/> | GOTERM_MF_ALL   | <a href="#">purine ribonucleotide binding</a>                                | <a href="#">RT</a> |  | 28    | 9.6E-1  | 1.0E0     |
| Annotation Cluster 50    |                 | Enrichment Score: 0.7                                                        | <b>G</b>           |  | Count | P_Value | Benjamini |
| <input type="checkbox"/> | GOTERM_BP_ALL   | <a href="#">carbohydrate catabolic process</a>                               | <a href="#">RT</a> |  | 6     | 3.2E-2  | 8.3E-1    |
| <input type="checkbox"/> | GOTERM_BP_ALL   | <a href="#">carbohydrate metabolic process</a>                               | <a href="#">RT</a> |  | 16    | 3.4E-2  | 8.4E-1    |
| <input type="checkbox"/> | KEGG_PATHWAY    | <a href="#">Glycolysis / Gluconeogenesis</a>                                 | <a href="#">RT</a> |  | 5     | 5.5E-2  | 8.6E-1    |
| <input type="checkbox"/> | GOTERM_BP_ALL   | <a href="#">cellular carbohydrate catabolic process</a>                      | <a href="#">RT</a> |  | 5     | 8.8E-2  | 9.5E-1    |
| <input type="checkbox"/> | KEGG_PATHWAY    | <a href="#">Fructose and mannose metabolism</a>                              | <a href="#">RT</a> |  | 4     | 1.0E-1  | 8.3E-1    |
| <input type="checkbox"/> | GOTERM_BP_ALL   | <a href="#">macromolecule catabolic process</a>                              | <a href="#">RT</a> |  | 11    | 2.0E-1  | 9.9E-1    |
| <input type="checkbox"/> | GOTERM_BP_ALL   | <a href="#">hexose metabolic process</a>                                     | <a href="#">RT</a> |  | 6     | 2.2E-1  | 9.9E-1    |
| <input type="checkbox"/> | SP_PIR_KEYWORDS | <a href="#">glycolysis</a>                                                   | <a href="#">RT</a> |  | 3     | 2.2E-1  | 9.8E-1    |
| <input type="checkbox"/> | GOTERM_BP_ALL   | <a href="#">monosaccharide metabolic process</a>                             | <a href="#">RT</a> |  | 6     | 2.3E-1  | 9.9E-1    |
| <input type="checkbox"/> | GOTERM_BP_ALL   | <a href="#">alcohol metabolic process</a>                                    | <a href="#">RT</a> |  | 9     | 2.7E-1  | 1.0E0     |
| <input type="checkbox"/> | GOTERM_BP_ALL   | <a href="#">glycolysis</a>                                                   | <a href="#">RT</a> |  | 3     | 3.3E-1  | 1.0E0     |
| <input type="checkbox"/> | GOTERM_BP_ALL   | <a href="#">glucose catabolic process</a>                                    | <a href="#">RT</a> |  | 3     | 4.0E-1  | 1.0E0     |
| <input type="checkbox"/> | GOTERM_BP_ALL   | <a href="#">hexose catabolic process</a>                                     | <a href="#">RT</a> |  | 3     | 4.0E-1  | 1.0E0     |
| <input type="checkbox"/> | GOTERM_BP_ALL   | <a href="#">monosaccharide catabolic process</a>                             | <a href="#">RT</a> |  | 3     | 4.0E-1  | 1.0E0     |
| <input type="checkbox"/> | GOTERM_BP_ALL   | <a href="#">cellular carbohydrate metabolic process</a>                      | <a href="#">RT</a> |  | 8     | 4.1E-1  | 1.0E0     |
| <input type="checkbox"/> | GOTERM_BP_ALL   | <a href="#">alcohol catabolic process</a>                                    | <a href="#">RT</a> |  | 3     | 4.2E-1  | 1.0E0     |
| <input type="checkbox"/> | GOTERM_BP_ALL   | <a href="#">glucose metabolic process</a>                                    | <a href="#">RT</a> |  | 4     | 4.4E-1  | 1.0E0     |
| <input type="checkbox"/> | GOTERM_BP_ALL   | <a href="#">cellular macromolecule catabolic process</a>                     | <a href="#">RT</a> |  | 7     | 5.1E-1  | 1.0E0     |
| Annotation Cluster 51    |                 | Enrichment Score: 0.69                                                       | <b>G</b>           |  | Count | P_Value | Benjamini |
| <input type="checkbox"/> | GOTERM_BP_ALL   | <a href="#">regulation of cellular component organization and biogenesis</a> | <a href="#">RT</a> |  | 6     | 1.9E-2  | 7.5E-1    |
| <input type="checkbox"/> | GOTERM_BP_ALL   | <a href="#">actin polymerization and/or depolymerization</a>                 | <a href="#">RT</a> |  | 5     | 2.2E-2  | 7.6E-1    |
| <input type="checkbox"/> | GOTERM_BP_ALL   | <a href="#">actin filament-based process</a>                                 | <a href="#">RT</a> |  | 9     | 7.7E-2  | 9.4E-1    |
| <input type="checkbox"/> | GOTERM_BP_ALL   | <a href="#">actin filament capping</a>                                       | <a href="#">RT</a> |  | 3     | 8.7E-2  | 9.5E-1    |
| <input type="checkbox"/> | GOTERM_BP_ALL   | <a href="#">negative regulation of actin filament depolymerization</a>       | <a href="#">RT</a> |  | 3     | 8.7E-2  | 9.5E-1    |
| <input type="checkbox"/> | GOTERM_BP_ALL   | <a href="#">regulation of actin filament depolymerization</a>                | <a href="#">RT</a> |  | 3     | 1.0E-1  | 9.6E-1    |
| <input type="checkbox"/> | GOTERM_BP_ALL   | <a href="#">actin filament depolymerization</a>                              | <a href="#">RT</a> |  | 3     | 1.0E-1  | 9.6E-1    |
| <input type="checkbox"/> | SP_PIR_KEYWORDS | <a href="#">cytoskeleton</a>                                                 | <a href="#">RT</a> |  | 11    | 1.2E-1  | 9.4E-1    |
| <input type="checkbox"/> | GOTERM_BP_ALL   | <a href="#">actin cytoskeleton organization and biogenesis</a>               | <a href="#">RT</a> |  | 8     | 1.3E-1  | 9.8E-1    |
| <input type="checkbox"/> | GOTERM_MF_ALL   | <a href="#">actin binding</a>                                                | <a href="#">RT</a> |  | 10    | 1.4E-1  | 1.0E0     |
| <input type="checkbox"/> | GOTERM_BP_ALL   | <a href="#">protein depolymerization</a>                                     | <a href="#">RT</a> |  | 3     | 2.0E-1  | 9.9E-1    |
| <input type="checkbox"/> | GOTERM_BP_ALL   | <a href="#">regulation of actin polymerization and/or depolymerization</a>   | <a href="#">RT</a> |  | 3     | 2.1E-1  | 9.9E-1    |

|                          |                 |                                                                                       |                    |  |       |         |           |
|--------------------------|-----------------|---------------------------------------------------------------------------------------|--------------------|--|-------|---------|-----------|
| <input type="checkbox"/> | GOTERM_MF_ALL   | <a href="#">cytoskeletal protein binding</a>                                          | <a href="#">RT</a> |  | 12    | 2.2E-1  | 1.0E0     |
| <input type="checkbox"/> | GOTERM_BP_ALL   | <a href="#">regulation of actin filament length</a>                                   | <a href="#">RT</a> |  | 3     | 2.2E-1  | 9.9E-1    |
| <input type="checkbox"/> | GOTERM_BP_ALL   | <a href="#">negative regulation of cellular component organization and biogenesis</a> | <a href="#">RT</a> |  | 3     | 2.2E-1  | 9.9E-1    |
| <input type="checkbox"/> | GOTERM_BP_ALL   | <a href="#">regulation of actin cytoskeleton organization and biogenesis</a>          | <a href="#">RT</a> |  | 3     | 2.2E-1  | 9.9E-1    |
| <input type="checkbox"/> | GOTERM_BP_ALL   | <a href="#">regulation of cellular component size</a>                                 | <a href="#">RT</a> |  | 3     | 2.3E-1  | 9.9E-1    |
| <input type="checkbox"/> | GOTERM_BP_ALL   | <a href="#">regulation of organelle organization and biogenesis</a>                   | <a href="#">RT</a> |  | 3     | 2.5E-1  | 1.0E0     |
| <input type="checkbox"/> | GOTERM_BP_ALL   | <a href="#">regulation of cytoskeleton organization and biogenesis</a>                | <a href="#">RT</a> |  | 3     | 2.5E-1  | 1.0E0     |
| <input type="checkbox"/> | GOTERM_BP_ALL   | <a href="#">cytoskeleton organization and biogenesis</a>                              | <a href="#">RT</a> |  | 14    | 2.8E-1  | 1.0E0     |
| <input type="checkbox"/> | GOTERM_CC_ALL   | <a href="#">actin cytoskeleton</a>                                                    | <a href="#">RT</a> |  | 7     | 3.0E-1  | 1.0E0     |
| <input type="checkbox"/> | GOTERM_BP_ALL   | <a href="#">regulation of protein metabolic process</a>                               | <a href="#">RT</a> |  | 8     | 4.1E-1  | 1.0E0     |
| <input type="checkbox"/> | SP_PIR_KEYWORDS | <a href="#">actin-binding</a>                                                         | <a href="#">RT</a> |  | 5     | 5.1E-1  | 1.0E0     |
| <input type="checkbox"/> | GOTERM_BP_ALL   | <a href="#">negative regulation of protein metabolic process</a>                      | <a href="#">RT</a> |  | 3     | 5.7E-1  | 1.0E0     |
| <input type="checkbox"/> | GOTERM_CC_ALL   | <a href="#">cytoskeleton</a>                                                          | <a href="#">RT</a> |  | 14    | 9.4E-1  | 1.0E0     |
| <input type="checkbox"/> | GOTERM_CC_ALL   | <a href="#">intracellular non-membrane-bound organelle</a>                            | <a href="#">RT</a> |  | 23    | 9.7E-1  | 1.0E0     |
| <input type="checkbox"/> | GOTERM_CC_ALL   | <a href="#">non-membrane-bound organelle</a>                                          | <a href="#">RT</a> |  | 23    | 9.7E-1  | 1.0E0     |
| <input type="checkbox"/> | GOTERM_CC_ALL   | <a href="#">cytoskeletal part</a>                                                     | <a href="#">RT</a> |  | 6     | 9.9E-1  | 1.0E0     |
| Annotation Cluster 52    |                 | Enrichment Score: 0.68                                                                | <b>G</b>           |  | Count | P_Value | Benjamini |
| <input type="checkbox"/> | INTERPRO        | <a href="#">Proteinase inhibitor I25, cystatin</a>                                    | <a href="#">RT</a> |  | 3     | 8.3E-2  | 1.0E0     |
| <input type="checkbox"/> | SMART           | <a href="#">CY</a>                                                                    | <a href="#">RT</a> |  | 3     | 8.7E-2  | 1.0E0     |
| <input type="checkbox"/> | GOTERM_MF_ALL   | <a href="#">enzyme inhibitor activity</a>                                             | <a href="#">RT</a> |  | 7     | 3.5E-1  | 1.0E0     |
| <input type="checkbox"/> | GOTERM_MF_ALL   | <a href="#">endopeptidase inhibitor activity</a>                                      | <a href="#">RT</a> |  | 5     | 3.9E-1  | 1.0E0     |
| <input type="checkbox"/> | GOTERM_MF_ALL   | <a href="#">protease inhibitor activity</a>                                           | <a href="#">RT</a> |  | 5     | 4.0E-1  | 1.0E0     |
| Annotation Cluster 53    |                 | Enrichment Score: 0.64                                                                | <b>G</b>           |  | Count | P_Value | Benjamini |
| <input type="checkbox"/> | GOTERM_CC_ALL   | <a href="#">lamellipodium</a>                                                         | <a href="#">RT</a> |  | 6     | 7.4E-3  | 5.6E-1    |
| <input type="checkbox"/> | GOTERM_CC_ALL   | <a href="#">leading edge</a>                                                          | <a href="#">RT</a> |  | 7     | 1.7E-2  | 7.6E-1    |
| <input type="checkbox"/> | INTERPRO        | <a href="#">Pleckstrin homology-type</a>                                              | <a href="#">RT</a> |  | 11    | 3.8E-2  | 1.0E0     |
| <input type="checkbox"/> | GOTERM_BP_ALL   | <a href="#">regulation of signal transduction</a>                                     | <a href="#">RT</a> |  | 16    | 5.8E-2  | 9.2E-1    |
| <input type="checkbox"/> | INTERPRO        | <a href="#">Pleckstrin-like</a>                                                       | <a href="#">RT</a> |  | 8     | 1.9E-1  | 1.0E0     |
| <input type="checkbox"/> | GOTERM_MF_ALL   | <a href="#">guanyl-nucleotide exchange factor activity</a>                            | <a href="#">RT</a> |  | 6     | 2.0E-1  | 1.0E0     |
| <input type="checkbox"/> | GOTERM_BP_ALL   | <a href="#">regulation of Rho protein signal transduction</a>                         | <a href="#">RT</a> |  | 4     | 2.1E-1  | 9.9E-1    |
| <input type="checkbox"/> | SMART           | <a href="#">PH</a>                                                                    | <a href="#">RT</a> |  | 8     | 2.5E-1  | 1.0E0     |
| <input type="checkbox"/> | GOTERM_MF_ALL   | <a href="#">Ras guanyl-nucleotide exchange factor activity</a>                        | <a href="#">RT</a> |  | 4     | 2.6E-1  | 1.0E0     |
| <input type="checkbox"/> | GOTERM_BP_ALL   | <a href="#">regulation of small GTPase mediated signal transduction</a>               | <a href="#">RT</a> |  | 6     | 3.5E-1  | 1.0E0     |
| <input type="checkbox"/> | INTERPRO        | <a href="#">DH</a>                                                                    | <a href="#">RT</a> |  | 3     | 3.6E-1  | 1.0E0     |
| <input type="checkbox"/> | GOTERM_BP_ALL   | <a href="#">Rho protein signal transduction</a>                                       | <a href="#">RT</a> |  | 4     | 3.6E-1  | 1.0E0     |
| <input type="checkbox"/> | GOTERM_BP_ALL   | <a href="#">regulation of Ras protein signal transduction</a>                         | <a href="#">RT</a> |  | 5     | 3.6E-1  | 1.0E0     |
| <input type="checkbox"/> | SMART           | <a href="#">RhoGEF</a>                                                                | <a href="#">RT</a> |  | 3     | 3.7E-1  | 1.0E0     |
| <input type="checkbox"/> | GOTERM_MF_ALL   | <a href="#">Rho guanyl-nucleotide exchange factor activity</a>                        | <a href="#">RT</a> |  | 3     | 4.4E-1  | 1.0E0     |
| <input type="checkbox"/> | SP_PIR_KEYWORDS | <a href="#">cell projection</a>                                                       | <a href="#">RT</a> |  | 3     | 5.0E-1  | 1.0E0     |
| <input type="checkbox"/> | GOTERM_MF_ALL   | <a href="#">GTPase regulator activity</a>                                             | <a href="#">RT</a> |  | 8     | 6.0E-1  | 1.0E0     |
| <input type="checkbox"/> | GOTERM_BP_ALL   | <a href="#">Ras protein signal transduction</a>                                       | <a href="#">RT</a> |  | 5     | 6.1E-1  | 1.0E0     |
| <input type="checkbox"/> | GOTERM_MF_ALL   | <a href="#">small GTPase regulator activity</a>                                       | <a href="#">RT</a> |  | 5     | 6.3E-1  | 1.0E0     |
| <input type="checkbox"/> | GOTERM_CC_ALL   | <a href="#">cell projection</a>                                                       | <a href="#">RT</a> |  | 6     | 9.2E-1  | 1.0E0     |
| <input type="checkbox"/> | GOTERM_BP_ALL   | <a href="#">small GTPase mediated signal transduction</a>                             | <a href="#">RT</a> |  | 6     | 9.4E-1  | 1.0E0     |
| Annotation Cluster 54    |                 | Enrichment Score: 0.64                                                                | <b>G</b>           |  | Count | P_Value | Benjamini |

|                          |                 |                                                                                    |                    |  |       |         |           |
|--------------------------|-----------------|------------------------------------------------------------------------------------|--------------------|--|-------|---------|-----------|
| <input type="checkbox"/> | GOTERM_BP_ALL   | <a href="#">positive regulation of transcription factor activity</a>               | <a href="#">RT</a> |  | 3     | 9.4E-2  | 9.6E-1    |
| <input type="checkbox"/> | GOTERM_MF_ALL   | <a href="#">transcription cofactor activity</a>                                    | <a href="#">RT</a> |  | 7     | 1.3E-1  | 1.0E0     |
| <input type="checkbox"/> | GOTERM_BP_ALL   | <a href="#">regulation of transcription factor activity</a>                        | <a href="#">RT</a> |  | 3     | 1.5E-1  | 9.8E-1    |
| <input type="checkbox"/> | GOTERM_MF_ALL   | <a href="#">transcription factor binding</a>                                       | <a href="#">RT</a> |  | 9     | 1.7E-1  | 1.0E0     |
| <input type="checkbox"/> | GOTERM_MF_ALL   | <a href="#">transcription corepressor activity</a>                                 | <a href="#">RT</a> |  | 3     | 4.0E-1  | 1.0E0     |
| <input type="checkbox"/> | GOTERM_MF_ALL   | <a href="#">transcription activator activity</a>                                   | <a href="#">RT</a> |  | 6     | 5.2E-1  | 1.0E0     |
| <input type="checkbox"/> | GOTERM_MF_ALL   | <a href="#">transcription coactivator activity</a>                                 | <a href="#">RT</a> |  | 3     | 5.5E-1  | 1.0E0     |
| Annotation Cluster 55    |                 | Enrichment Score: 0.61                                                             | <b>G</b>           |  | Count | P_Value | Benjamini |
| <input type="checkbox"/> | GOTERM_BP_ALL   | <a href="#">positive regulation of phagocytosis</a>                                | <a href="#">RT</a> |  | 3     | 6.2E-2  | 9.2E-1    |
| <input type="checkbox"/> | GOTERM_BP_ALL   | <a href="#">regulation of phagocytosis</a>                                         | <a href="#">RT</a> |  | 3     | 6.2E-2  | 9.2E-1    |
| <input type="checkbox"/> | GOTERM_BP_ALL   | <a href="#">positive regulation of endocytosis</a>                                 | <a href="#">RT</a> |  | 3     | 1.1E-1  | 9.6E-1    |
| <input type="checkbox"/> | GOTERM_BP_ALL   | <a href="#">phagocytosis</a>                                                       | <a href="#">RT</a> |  | 3     | 1.9E-1  | 9.9E-1    |
| <input type="checkbox"/> | GOTERM_BP_ALL   | <a href="#">regulation of endocytosis</a>                                          | <a href="#">RT</a> |  | 3     | 2.1E-1  | 9.9E-1    |
| <input type="checkbox"/> | GOTERM_BP_ALL   | <a href="#">positive regulation of transport</a>                                   | <a href="#">RT</a> |  | 3     | 2.3E-1  | 9.9E-1    |
| <input type="checkbox"/> | GOTERM_BP_ALL   | <a href="#">regulation of transport</a>                                            | <a href="#">RT</a> |  | 4     | 4.1E-1  | 1.0E0     |
| <input type="checkbox"/> | GOTERM_BP_ALL   | <a href="#">membrane organization and biogenesis</a>                               | <a href="#">RT</a> |  | 7     | 4.9E-1  | 1.0E0     |
| <input type="checkbox"/> | GOTERM_BP_ALL   | <a href="#">endocytosis</a>                                                        | <a href="#">RT</a> |  | 5     | 5.3E-1  | 1.0E0     |
| <input type="checkbox"/> | GOTERM_BP_ALL   | <a href="#">membrane invagination</a>                                              | <a href="#">RT</a> |  | 5     | 5.3E-1  | 1.0E0     |
| <input type="checkbox"/> | GOTERM_BP_ALL   | <a href="#">vesicle-mediated transport</a>                                         | <a href="#">RT</a> |  | 7     | 9.2E-1  | 1.0E0     |
| Annotation Cluster 56    |                 | Enrichment Score: 0.6                                                              | <b>G</b>           |  | Count | P_Value | Benjamini |
| <input type="checkbox"/> | GOTERM_BP_ALL   | <a href="#">regulation of G-protein coupled receptor protein signaling pathway</a> | <a href="#">RT</a> |  | 5     | 1.4E-3  | 3.5E-1    |
| <input type="checkbox"/> | INTERPRO        | <a href="#">Receptor activity modifying protein</a>                                | <a href="#">RT</a> |  | 3     | 1.4E-3  | 1.0E0     |
| <input type="checkbox"/> | GOTERM_MF_ALL   | <a href="#">coreceptor activity</a>                                                | <a href="#">RT</a> |  | 3     | 1.9E-2  | 9.6E-1    |
| <input type="checkbox"/> | GOTERM_MF_ALL   | <a href="#">protein transporter activity</a>                                       | <a href="#">RT</a> |  | 4     | 6.7E-1  | 1.0E0     |
| <input type="checkbox"/> | GOTERM_BP_ALL   | <a href="#">intracellular transport</a>                                            | <a href="#">RT</a> |  | 13    | 8.1E-1  | 1.0E0     |
| <input type="checkbox"/> | GOTERM_BP_ALL   | <a href="#">intracellular protein transport</a>                                    | <a href="#">RT</a> |  | 7     | 9.1E-1  | 1.0E0     |
| <input type="checkbox"/> | GOTERM_BP_ALL   | <a href="#">establishment of cellular localization</a>                             | <a href="#">RT</a> |  | 13    | 9.6E-1  | 1.0E0     |
| <input type="checkbox"/> | GOTERM_BP_ALL   | <a href="#">cellular localization</a>                                              | <a href="#">RT</a> |  | 13    | 9.7E-1  | 1.0E0     |
| <input type="checkbox"/> | GOTERM_BP_ALL   | <a href="#">protein transport</a>                                                  | <a href="#">RT</a> |  | 9     | 9.8E-1  | 1.0E0     |
| <input type="checkbox"/> | GOTERM_BP_ALL   | <a href="#">protein localization</a>                                               | <a href="#">RT</a> |  | 10    | 9.9E-1  | 1.0E0     |
| <input type="checkbox"/> | GOTERM_BP_ALL   | <a href="#">establishment of protein localization</a>                              | <a href="#">RT</a> |  | 9     | 9.9E-1  | 1.0E0     |
| <input type="checkbox"/> | SP_PIR_KEYWORDS | <a href="#">protein transport</a>                                                  | <a href="#">RT</a> |  | 4     | 9.9E-1  | 1.0E0     |
| <input type="checkbox"/> | GOTERM_BP_ALL   | <a href="#">macromolecule localization</a>                                         | <a href="#">RT</a> |  | 10    | 9.9E-1  | 1.0E0     |
| Annotation Cluster 57    |                 | Enrichment Score: 0.57                                                             | <b>G</b>           |  | Count | P_Value | Benjamini |
| <input type="checkbox"/> | GOTERM_CC_ALL   | <a href="#">plasma membrane part</a>                                               | <a href="#">RT</a> |  | 33    | 2.0E-1  | 1.0E0     |
| <input type="checkbox"/> | GOTERM_CC_ALL   | <a href="#">integral to plasma membrane</a>                                        | <a href="#">RT</a> |  | 16    | 2.9E-1  | 1.0E0     |
| <input type="checkbox"/> | GOTERM_CC_ALL   | <a href="#">intrinsic to plasma membrane</a>                                       | <a href="#">RT</a> |  | 16    | 3.3E-1  | 1.0E0     |
| Annotation Cluster 58    |                 | Enrichment Score: 0.57                                                             | <b>G</b>           |  | Count | P_Value | Benjamini |
| <input type="checkbox"/> | GOTERM_BP_ALL   | <a href="#">chondrocyte differentiation</a>                                        | <a href="#">RT</a> |  | 4     | 6.4E-3  | 5.1E-1    |
| <input type="checkbox"/> | GOTERM_BP_ALL   | <a href="#">cartilage development</a>                                              | <a href="#">RT</a> |  | 5     | 3.4E-2  | 8.4E-1    |
| <input type="checkbox"/> | GOTERM_BP_ALL   | <a href="#">positive regulation of amino acid metabolic process</a>                | <a href="#">RT</a> |  | 3     | 1.7E-1  | 9.9E-1    |
| <input type="checkbox"/> | GOTERM_BP_ALL   | <a href="#">positive regulation of amine metabolic process</a>                     | <a href="#">RT</a> |  | 3     | 1.7E-1  | 9.9E-1    |
| <input type="checkbox"/> | GOTERM_BP_ALL   | <a href="#">positive regulation of protein amino acid phosphorylation</a>          | <a href="#">RT</a> |  | 3     | 1.7E-1  | 9.9E-1    |
| <input type="checkbox"/> | GOTERM_BP_ALL   | <a href="#">regulation of protein amino acid phosphorylation</a>                   | <a href="#">RT</a> |  | 3     | 3.7E-1  | 1.0E0     |
| <input type="checkbox"/> | GOTERM_BP_ALL   | <a href="#">regulation of amine metabolic process</a>                              | <a href="#">RT</a> |  | 3     | 3.8E-1  | 1.0E0     |
| <input type="checkbox"/> | GOTERM_BP_ALL   | <a href="#">regulation of amino acid metabolic process</a>                         | <a href="#">RT</a> |  | 3     | 3.8E-1  | 1.0E0     |
| <input type="checkbox"/> | GOTERM_BP_ALL   | <a href="#">nitrogen compound metabolic process</a>                                | <a href="#">RT</a> |  | 11    | 4.2E-1  | 1.0E0     |

|                          |                 |                                                                                                     |          |  |       |         |           |
|--------------------------|-----------------|-----------------------------------------------------------------------------------------------------|----------|--|-------|---------|-----------|
| <input type="checkbox"/> | GOTERM_BP_ALL   | <a href="#">regulation of phosphorylation</a>                                                       | RT       |  | 3     | 4.4E-1  | 1.0E0     |
| <input type="checkbox"/> | GOTERM_BP_ALL   | <a href="#">regulation of phosphorus metabolic process</a>                                          | RT       |  | 3     | 4.6E-1  | 1.0E0     |
| <input type="checkbox"/> | GOTERM_BP_ALL   | <a href="#">regulation of phosphate metabolic process</a>                                           | RT       |  | 3     | 4.6E-1  | 1.0E0     |
| <input type="checkbox"/> | GOTERM_BP_ALL   | <a href="#">amine metabolic process</a>                                                             | RT       |  | 10    | 4.6E-1  | 1.0E0     |
| <input type="checkbox"/> | GOTERM_BP_ALL   | <a href="#">amino acid metabolic process</a>                                                        | RT       |  | 7     | 4.8E-1  | 1.0E0     |
| <input type="checkbox"/> | GOTERM_BP_ALL   | <a href="#">amino acid and derivative metabolic process</a>                                         | RT       |  | 8     | 5.8E-1  | 1.0E0     |
| <input type="checkbox"/> | GOTERM_BP_ALL   | <a href="#">carboxylic acid metabolic process</a>                                                   | RT       |  | 9     | 8.6E-1  | 1.0E0     |
| <input type="checkbox"/> | GOTERM_BP_ALL   | <a href="#">organic acid metabolic process</a>                                                      | RT       |  | 9     | 8.6E-1  | 1.0E0     |
| Annotation Cluster 59    |                 | Enrichment Score: 0.55                                                                              | <b>G</b> |  | Count | P_Value | Benjamini |
| <input type="checkbox"/> | GOTERM_MF_ALL   | <a href="#">steroid binding</a>                                                                     | RT       |  | 4     | 1.3E-1  | 1.0E0     |
| <input type="checkbox"/> | INTERPRO        | <a href="#">Nuclear hormone receptor, ligand-binding_core</a>                                       | RT       |  | 3     | 2.8E-1  | 1.0E0     |
| <input type="checkbox"/> | INTERPRO        | <a href="#">Steroid hormone receptor</a>                                                            | RT       |  | 3     | 2.8E-1  | 1.0E0     |
| <input type="checkbox"/> | INTERPRO        | <a href="#">Nuclear hormone receptor, ligand-binding</a>                                            | RT       |  | 3     | 2.8E-1  | 1.0E0     |
| <input type="checkbox"/> | SMART           | <a href="#">HOLI</a>                                                                                | RT       |  | 3     | 2.9E-1  | 1.0E0     |
| <input type="checkbox"/> | GOTERM_MF_ALL   | <a href="#">steroid hormone receptor activity</a>                                                   | RT       |  | 3     | 4.1E-1  | 1.0E0     |
| <input type="checkbox"/> | GOTERM_MF_ALL   | <a href="#">ligand-dependent nuclear receptor activity</a>                                          | RT       |  | 3     | 4.2E-1  | 1.0E0     |
| Annotation Cluster 60    |                 | Enrichment Score: 0.54                                                                              | <b>G</b> |  | Count | P_Value | Benjamini |
| <input type="checkbox"/> | GOTERM_BP_ALL   | <a href="#">biological regulation</a>                                                               | RT       |  | 121   | 1.4E-3  | 3.4E-1    |
| <input type="checkbox"/> | GOTERM_BP_ALL   | <a href="#">regulation of cellular process</a>                                                      | RT       |  | 101   | 4.1E-3  | 4.2E-1    |
| <input type="checkbox"/> | GOTERM_BP_ALL   | <a href="#">regulation of biological process</a>                                                    | RT       |  | 109   | 5.0E-3  | 4.6E-1    |
| <input type="checkbox"/> | SP_PIR_KEYWORDS | <a href="#">Transcription regulation</a>                                                            | RT       |  | 33    | 1.9E-1  | 9.7E-1    |
| <input type="checkbox"/> | SP_PIR_KEYWORDS | <a href="#">Transcription</a>                                                                       | RT       |  | 33    | 2.1E-1  | 9.8E-1    |
| <input type="checkbox"/> | GOTERM_BP_ALL   | <a href="#">regulation of metabolic process</a>                                                     | RT       |  | 59    | 3.4E-1  | 1.0E0     |
| <input type="checkbox"/> | GOTERM_MF_ALL   | <a href="#">transcription regulator activity</a>                                                    | RT       |  | 31    | 3.5E-1  | 1.0E0     |
| <input type="checkbox"/> | GOTERM_BP_ALL   | <a href="#">transcription, DNA-dependent</a>                                                        | RT       |  | 48    | 4.5E-1  | 1.0E0     |
| <input type="checkbox"/> | GOTERM_BP_ALL   | <a href="#">regulation of cellular metabolic process</a>                                            | RT       |  | 55    | 4.5E-1  | 1.0E0     |
| <input type="checkbox"/> | GOTERM_BP_ALL   | <a href="#">RNA biosynthetic process</a>                                                            | RT       |  | 48    | 4.5E-1  | 1.0E0     |
| <input type="checkbox"/> | GOTERM_BP_ALL   | <a href="#">transcription</a>                                                                       | RT       |  | 51    | 4.7E-1  | 1.0E0     |
| <input type="checkbox"/> | GOTERM_BP_ALL   | <a href="#">regulation of transcription, DNA-dependent</a>                                          | RT       |  | 47    | 4.8E-1  | 1.0E0     |
| <input type="checkbox"/> | GOTERM_BP_ALL   | <a href="#">regulation of nucleobase, nucleoside, nucleotide and nucleic acid metabolic process</a> | RT       |  | 50    | 4.9E-1  | 1.0E0     |
| <input type="checkbox"/> | GOTERM_BP_ALL   | <a href="#">regulation of transcription</a>                                                         | RT       |  | 49    | 4.9E-1  | 1.0E0     |
| <input type="checkbox"/> | GOTERM_MF_ALL   | <a href="#">sequence-specific DNA binding</a>                                                       | RT       |  | 12    | 5.1E-1  | 1.0E0     |
| <input type="checkbox"/> | GOTERM_BP_ALL   | <a href="#">biopolymer metabolic process</a>                                                        | RT       |  | 97    | 5.5E-1  | 1.0E0     |
| <input type="checkbox"/> | GOTERM_BP_ALL   | <a href="#">regulation of gene expression</a>                                                       | RT       |  | 51    | 5.7E-1  | 1.0E0     |
| <input type="checkbox"/> | SP_PIR_KEYWORDS | <a href="#">dna-binding</a>                                                                         | RT       |  | 28    | 5.7E-1  | 1.0E0     |
| <input type="checkbox"/> | GOTERM_MF_ALL   | <a href="#">transcription factor activity</a>                                                       | RT       |  | 20    | 6.1E-1  | 1.0E0     |
| <input type="checkbox"/> | GOTERM_CC_ALL   | <a href="#">nucleus</a>                                                                             | RT       |  | 83    | 6.5E-1  | 1.0E0     |
| <input type="checkbox"/> | GOTERM_MF_ALL   | <a href="#">DNA binding</a>                                                                         | RT       |  | 39    | 7.9E-1  | 1.0E0     |
| <input type="checkbox"/> | GOTERM_MF_ALL   | <a href="#">nucleic acid binding</a>                                                                | RT       |  | 62    | 8.0E-1  | 1.0E0     |
| <input type="checkbox"/> | GOTERM_BP_ALL   | <a href="#">RNA metabolic process</a>                                                               | RT       |  | 51    | 8.0E-1  | 1.0E0     |
| <input type="checkbox"/> | SP_PIR_KEYWORDS | <a href="#">nucleus</a>                                                                             | RT       |  | 61    | 8.2E-1  | 1.0E0     |
| <input type="checkbox"/> | GOTERM_BP_ALL   | <a href="#">gene expression</a>                                                                     | RT       |  | 58    | 9.0E-1  | 1.0E0     |
| <input type="checkbox"/> | GOTERM_BP_ALL   | <a href="#">nucleobase, nucleoside, nucleotide and nucleic acid metabolic process</a>               | RT       |  | 62    | 9.3E-1  | 1.0E0     |
| Annotation Cluster 61    |                 | Enrichment Score: 0.54                                                                              | <b>G</b> |  | Count | P_Value | Benjamini |
| <input type="checkbox"/> | SP_PIR_KEYWORDS | <a href="#">immune response</a>                                                                     | RT       |  | 9     | 1.0E-2  | 6.3E-1    |
| <input type="checkbox"/> | GOTERM_BP_ALL   | <a href="#">positive regulation of multicellular organismal process</a>                             | RT       |  | 7     | 5.7E-2  | 9.1E-1    |

| <input type="checkbox"/> | Category        | Term                                                                                                         | RT       | Bar | Count | P_Value | Benjamini |
|--------------------------|-----------------|--------------------------------------------------------------------------------------------------------------|----------|-----|-------|---------|-----------|
| <input type="checkbox"/> | SP_PIR_KEYWORDS | <a href="#">innate immunity</a>                                                                              | RT       |     | 3     | 2.9E-1  | 9.9E-1    |
| <input type="checkbox"/> | GOTERM_BP_ALL   | <a href="#">innate immune response</a>                                                                       | RT       |     | 4     | 3.5E-1  | 1.0E0     |
| <input type="checkbox"/> | GOTERM_BP_ALL   | <a href="#">immune effector process</a>                                                                      | RT       |     | 5     | 3.6E-1  | 1.0E0     |
| <input type="checkbox"/> | GOTERM_BP_ALL   | <a href="#">positive regulation of immune system process</a>                                                 | RT       |     | 4     | 3.7E-1  | 1.0E0     |
| <input type="checkbox"/> | GOTERM_BP_ALL   | <a href="#">regulation of immune system process</a>                                                          | RT       |     | 4     | 4.6E-1  | 1.0E0     |
| <input type="checkbox"/> | GOTERM_BP_ALL   | <a href="#">activation of immune response</a>                                                                | RT       |     | 3     | 5.0E-1  | 1.0E0     |
| <input type="checkbox"/> | GOTERM_BP_ALL   | <a href="#">lymphocyte mediated immunity</a>                                                                 | RT       |     | 3     | 6.3E-1  | 1.0E0     |
| <input type="checkbox"/> | GOTERM_BP_ALL   | <a href="#">positive regulation of immune response</a>                                                       | RT       |     | 3     | 6.3E-1  | 1.0E0     |
| <input type="checkbox"/> | GOTERM_BP_ALL   | <a href="#">leukocyte mediated immunity</a>                                                                  | RT       |     | 3     | 6.6E-1  | 1.0E0     |
| <input type="checkbox"/> | GOTERM_BP_ALL   | <a href="#">regulation of immune response</a>                                                                | RT       |     | 3     | 7.1E-1  | 1.0E0     |
| Annotation Cluster 62    |                 | Enrichment Score: 0.52                                                                                       | <b>G</b> |     | Count | P_Value | Benjamini |
| <input type="checkbox"/> | GOTERM_BP_ALL   | <a href="#">cytokine production</a>                                                                          | RT       |     | 6     | 1.1E-1  | 9.7E-1    |
| <input type="checkbox"/> | GOTERM_BP_ALL   | <a href="#">cytokine metabolic process</a>                                                                   | RT       |     | 3     | 5.0E-1  | 1.0E0     |
| <input type="checkbox"/> | GOTERM_BP_ALL   | <a href="#">cytokine biosynthetic process</a>                                                                | RT       |     | 3     | 5.0E-1  | 1.0E0     |
| Annotation Cluster 63    |                 | Enrichment Score: 0.52                                                                                       | <b>G</b> |     | Count | P_Value | Benjamini |
| <input type="checkbox"/> | SP_PIR_KEYWORDS | <a href="#">transmembrane</a>                                                                                | RT       |     | 78    | 2.0E-1  | 9.7E-1    |
| <input type="checkbox"/> | UP_SEQ_FEATURE  | transmembrane region                                                                                         | RT       |     | 58    | 2.1E-1  | 1.0E0     |
| <input type="checkbox"/> | UP_SEQ_FEATURE  | topological domain:Cytoplasmic                                                                               | RT       |     | 44    | 2.9E-1  | 1.0E0     |
| <input type="checkbox"/> | GOTERM_CC_ALL   | <a href="#">integral to membrane</a>                                                                         | RT       |     | 94    | 2.9E-1  | 1.0E0     |
| <input type="checkbox"/> | SP_PIR_KEYWORDS | <a href="#">membrane</a>                                                                                     | RT       |     | 95    | 3.0E-1  | 9.9E-1    |
| <input type="checkbox"/> | GOTERM_CC_ALL   | <a href="#">intrinsic to membrane</a>                                                                        | RT       |     | 94    | 3.1E-1  | 1.0E0     |
| <input type="checkbox"/> | GOTERM_CC_ALL   | <a href="#">membrane part</a>                                                                                | RT       |     | 105   | 3.1E-1  | 1.0E0     |
| <input type="checkbox"/> | GOTERM_CC_ALL   | <a href="#">membrane</a>                                                                                     | RT       |     | 128   | 4.3E-1  | 1.0E0     |
| <input type="checkbox"/> | UP_SEQ_FEATURE  | topological domain:Extracellular                                                                             | RT       |     | 32    | 4.7E-1  | 1.0E0     |
| Annotation Cluster 64    |                 | Enrichment Score: 0.51                                                                                       | <b>G</b> |     | Count | P_Value | Benjamini |
| <input type="checkbox"/> | GOTERM_BP_ALL   | <a href="#">protein amino acid acylation</a>                                                                 | RT       |     | 3     | 1.1E-1  | 9.6E-1    |
| <input type="checkbox"/> | GOTERM_MF_ALL   | <a href="#">N-acyltransferase activity</a>                                                                   | RT       |     | 4     | 1.6E-1  | 1.0E0     |
| <input type="checkbox"/> | GOTERM_MF_ALL   | <a href="#">acyltransferase activity</a>                                                                     | RT       |     | 6     | 3.3E-1  | 1.0E0     |
| <input type="checkbox"/> | GOTERM_MF_ALL   | <a href="#">N-acetyltransferase activity</a>                                                                 | RT       |     | 3     | 3.4E-1  | 1.0E0     |
| <input type="checkbox"/> | GOTERM_MF_ALL   | <a href="#">transferase activity, transferring groups other than amino-acyl groups</a>                       | RT       |     | 6     | 3.4E-1  | 1.0E0     |
| <input type="checkbox"/> | GOTERM_MF_ALL   | <a href="#">transferase activity, transferring acyl groups</a>                                               | RT       |     | 6     | 3.7E-1  | 1.0E0     |
| <input type="checkbox"/> | COG_ONTOLOGY    | <a href="#">Lipid metabolism</a>                                                                             | RT       |     | 3     | 4.1E-1  | 1.0E0     |
| <input type="checkbox"/> | GOTERM_MF_ALL   | <a href="#">acetyltransferase activity</a>                                                                   | RT       |     | 3     | 4.4E-1  | 1.0E0     |
| <input type="checkbox"/> | SP_PIR_KEYWORDS | <a href="#">acyltransferase</a>                                                                              | RT       |     | 4     | 5.6E-1  | 1.0E0     |
| Annotation Cluster 65    |                 | Enrichment Score: 0.48                                                                                       | <b>G</b> |     | Count | P_Value | Benjamini |
| <input type="checkbox"/> | SP_PIR_KEYWORDS | <a href="#">lectin</a>                                                                                       | RT       |     | 7     | 1.2E-1  | 9.4E-1    |
| <input type="checkbox"/> | GOTERM_MF_ALL   | <a href="#">sugar binding</a>                                                                                | RT       |     | 7     | 2.6E-1  | 1.0E0     |
| <input type="checkbox"/> | SMART           | <a href="#">CLECT</a>                                                                                        | RT       |     | 4     | 5.1E-1  | 1.0E0     |
| <input type="checkbox"/> | INTERPRO        | <a href="#">C-type lectin</a>                                                                                | RT       |     | 3     | 7.3E-1  | 1.0E0     |
| Annotation Cluster 66    |                 | Enrichment Score: 0.48                                                                                       | <b>G</b> |     | Count | P_Value | Benjamini |
| <input type="checkbox"/> | SP_PIR_KEYWORDS | <a href="#">repressor</a>                                                                                    | RT       |     | 11    | 9.7E-2  | 9.3E-1    |
| <input type="checkbox"/> | GOTERM_MF_ALL   | <a href="#">transcription repressor activity</a>                                                             | RT       |     | 7     | 1.8E-1  | 1.0E0     |
| <input type="checkbox"/> | GOTERM_BP_ALL   | <a href="#">negative regulation of metabolic process</a>                                                     | RT       |     | 12    | 2.6E-1  | 1.0E0     |
| <input type="checkbox"/> | GOTERM_BP_ALL   | <a href="#">negative regulation of transcription</a>                                                         | RT       |     | 8     | 4.2E-1  | 1.0E0     |
| <input type="checkbox"/> | GOTERM_BP_ALL   | <a href="#">negative regulation of nucleobase, nucleoside, nucleotide and nucleic acid metabolic process</a> | RT       |     | 8     | 4.9E-1  | 1.0E0     |
| <input type="checkbox"/> | GOTERM_BP_ALL   | <a href="#">negative regulation of transcription, DNA-dependent</a>                                          | RT       |     | 6     | 4.9E-1  | 1.0E0     |
| <input type="checkbox"/> | GOTERM_BP_ALL   | <a href="#">negative regulation of cellular metabolic process</a>                                            | RT       |     | 9     | 5.0E-1  | 1.0E0     |

| <input type="checkbox"/> | GOTERM_BP_ALL         | <a href="#">negative regulation of transcription from RNA polymerase II promoter</a> | RT |  |  |  | 4     | 6.4E-1  | 1.0E0     |  |
|--------------------------|-----------------------|--------------------------------------------------------------------------------------|----|--|--|--|-------|---------|-----------|--|
|                          | Annotation Cluster 67 | Enrichment Score: 0.48                                                               | G  |  |  |  | Count | P_Value | Benjamini |  |
| <input type="checkbox"/> | GOTERM_BP_ALL         | <a href="#">protein amino acid autophosphorylation</a>                               | RT |  |  |  | 3     | 2.5E-1  | 1.0E0     |  |
| <input type="checkbox"/> | GOTERM_BP_ALL         | <a href="#">protein autophosphorylation</a>                                          | RT |  |  |  | 3     | 2.7E-1  | 1.0E0     |  |
| <input type="checkbox"/> | GOTERM_BP_ALL         | <a href="#">protein processing</a>                                                   | RT |  |  |  | 3     | 5.6E-1  | 1.0E0     |  |
|                          | Annotation Cluster 68 | Enrichment Score: 0.46                                                               | G  |  |  |  | Count | P_Value | Benjamini |  |
| <input type="checkbox"/> | GOTERM_BP_ALL         | <a href="#">lung development</a>                                                     | RT |  |  |  | 4     | 1.9E-1  | 9.9E-1    |  |
| <input type="checkbox"/> | GOTERM_BP_ALL         | <a href="#">respiratory tube development</a>                                         | RT |  |  |  | 4     | 2.0E-1  | 9.9E-1    |  |
| <input type="checkbox"/> | GOTERM_BP_ALL         | <a href="#">heart development</a>                                                    | RT |  |  |  | 7     | 2.2E-1  | 9.9E-1    |  |
| <input type="checkbox"/> | GOTERM_BP_ALL         | <a href="#">muscle cell differentiation</a>                                          | RT |  |  |  | 4     | 2.3E-1  | 9.9E-1    |  |
| <input type="checkbox"/> | GOTERM_BP_ALL         | <a href="#">myoblast differentiation</a>                                             | RT |  |  |  | 3     | 2.5E-1  | 1.0E0     |  |
| <input type="checkbox"/> | GOTERM_BP_ALL         | <a href="#">striated muscle development</a>                                          | RT |  |  |  | 5     | 3.6E-1  | 1.0E0     |  |
| <input type="checkbox"/> | GOTERM_BP_ALL         | <a href="#">skeletal muscle development</a>                                          | RT |  |  |  | 4     | 4.1E-1  | 1.0E0     |  |
| <input type="checkbox"/> | GOTERM_BP_ALL         | <a href="#">muscle fiber development</a>                                             | RT |  |  |  | 3     | 4.6E-1  | 1.0E0     |  |
| <input type="checkbox"/> | GOTERM_BP_ALL         | <a href="#">skeletal muscle fiber development</a>                                    | RT |  |  |  | 3     | 4.6E-1  | 1.0E0     |  |
| <input type="checkbox"/> | GOTERM_BP_ALL         | <a href="#">embryonic development ending in birth or egg hatching</a>                | RT |  |  |  | 6     | 5.2E-1  | 1.0E0     |  |
| <input type="checkbox"/> | GOTERM_BP_ALL         | <a href="#">muscle development</a>                                                   | RT |  |  |  | 5     | 5.9E-1  | 1.0E0     |  |
| <input type="checkbox"/> | GOTERM_BP_ALL         | <a href="#">chordate embryonic development</a>                                       | RT |  |  |  | 5     | 7.1E-1  | 1.0E0     |  |
|                          | Annotation Cluster 69 | Enrichment Score: 0.46                                                               | G  |  |  |  | Count | P_Value | Benjamini |  |
| <input type="checkbox"/> | SP_PIR_KEYWORDS       | <a href="#">cholesterol metabolism</a>                                               | RT |  |  |  | 3     | 9.8E-2  | 9.2E-1    |  |
| <input type="checkbox"/> | SP_PIR_KEYWORDS       | <a href="#">steroid metabolism</a>                                                   | RT |  |  |  | 3     | 1.6E-1  | 9.6E-1    |  |
| <input type="checkbox"/> | GOTERM_BP_ALL         | <a href="#">alcohol metabolic process</a>                                            | RT |  |  |  | 9     | 2.7E-1  | 1.0E0     |  |
| <input type="checkbox"/> | SP_PIR_KEYWORDS       | <a href="#">lipid metabolism</a>                                                     | RT |  |  |  | 4     | 3.9E-1  | 1.0E0     |  |
| <input type="checkbox"/> | GOTERM_BP_ALL         | <a href="#">cholesterol metabolic process</a>                                        | RT |  |  |  | 3     | 4.6E-1  | 1.0E0     |  |
| <input type="checkbox"/> | GOTERM_BP_ALL         | <a href="#">sterol metabolic process</a>                                             | RT |  |  |  | 3     | 5.0E-1  | 1.0E0     |  |
| <input type="checkbox"/> | GOTERM_BP_ALL         | <a href="#">steroid metabolic process</a>                                            | RT |  |  |  | 4     | 6.5E-1  | 1.0E0     |  |
| <input type="checkbox"/> | GOTERM_CC_ALL         | <a href="#">membrane fraction</a>                                                    | RT |  |  |  | 8     | 8.9E-1  | 1.0E0     |  |
|                          | Annotation Cluster 70 | Enrichment Score: 0.46                                                               | G  |  |  |  | Count | P_Value | Benjamini |  |
| <input type="checkbox"/> | INTERPRO              | <a href="#">Butyrophylin-like</a>                                                    | RT |  |  |  | 3     | 2.3E-1  | 1.0E0     |  |
| <input type="checkbox"/> | INTERPRO              | <a href="#">Zinc finger, B-box</a>                                                   | RT |  |  |  | 3     | 3.5E-1  | 1.0E0     |  |
| <input type="checkbox"/> | SMART                 | <a href="#">BBOX</a>                                                                 | RT |  |  |  | 3     | 3.6E-1  | 1.0E0     |  |
| <input type="checkbox"/> | INTERPRO              | <a href="#">SP1a/Ryanodine receptor SPRY</a>                                         | RT |  |  |  | 3     | 3.8E-1  | 1.0E0     |  |
| <input type="checkbox"/> | INTERPRO              | <a href="#">B302, (SPRY)-like</a>                                                    | RT |  |  |  | 3     | 4.0E-1  | 1.0E0     |  |
| <input type="checkbox"/> | SMART                 | <a href="#">SPRY</a>                                                                 | RT |  |  |  | 3     | 4.3E-1  | 1.0E0     |  |
|                          | Annotation Cluster 71 | Enrichment Score: 0.45                                                               | G  |  |  |  | Count | P_Value | Benjamini |  |
| <input type="checkbox"/> | KEGG_PATHWAY          | <a href="#">Long-term potentiation</a>                                               | RT |  |  |  | 4     | 2.5E-1  | 9.5E-1    |  |
| <input type="checkbox"/> | KEGG_PATHWAY          | <a href="#">Melanogenesis</a>                                                        | RT |  |  |  | 5     | 2.5E-1  | 9.5E-1    |  |
| <input type="checkbox"/> | KEGG_PATHWAY          | <a href="#">Wnt signaling pathway</a>                                                | RT |  |  |  | 4     | 7.3E-1  | 1.0E0     |  |
|                          | Annotation Cluster 72 | Enrichment Score: 0.44                                                               | G  |  |  |  | Count | P_Value | Benjamini |  |
| <input type="checkbox"/> | GOTERM_BP_ALL         | <a href="#">growth</a>                                                               | RT |  |  |  | 13    | 1.7E-2  | 7.2E-1    |  |
| <input type="checkbox"/> | GOTERM_BP_ALL         | <a href="#">cell migration</a>                                                       | RT |  |  |  | 13    | 3.6E-2  | 8.4E-1    |  |
| <input type="checkbox"/> | GOTERM_BP_ALL         | <a href="#">axon guidance</a>                                                        | RT |  |  |  | 5     | 1.2E-1  | 9.7E-1    |  |
| <input type="checkbox"/> | GOTERM_BP_ALL         | <a href="#">cell growth</a>                                                          | RT |  |  |  | 6     | 1.4E-1  | 9.8E-1    |  |
| <input type="checkbox"/> | GOTERM_BP_ALL         | <a href="#">regulation of cell size</a>                                              | RT |  |  |  | 6     | 1.8E-1  | 9.9E-1    |  |
| <input type="checkbox"/> | GOTERM_BP_ALL         | <a href="#">cellular structure morphogenesis</a>                                     | RT |  |  |  | 14    | 3.5E-1  | 1.0E0     |  |
| <input type="checkbox"/> | GOTERM_BP_ALL         | <a href="#">cell morphogenesis</a>                                                   | RT |  |  |  | 14    | 3.5E-1  | 1.0E0     |  |
| <input type="checkbox"/> | GOTERM_BP_ALL         | <a href="#">nervous system development</a>                                           | RT |  |  |  | 16    | 4.7E-1  | 1.0E0     |  |
| <input type="checkbox"/> | GOTERM_BP_ALL         | <a href="#">cytoskeleton-dependent intracellular transport</a>                       | RT |  |  |  | 4     | 4.8E-1  | 1.0E0     |  |
| <input type="checkbox"/> | GOTERM_BP_ALL         | <a href="#">axonogenesis</a>                                                         | RT |  |  |  | 5     | 4.9E-1  | 1.0E0     |  |



|                          |                 |                                                               |                    |  |       |         |           |
|--------------------------|-----------------|---------------------------------------------------------------|--------------------|--|-------|---------|-----------|
| <input type="checkbox"/> | GOTERM_BP_ALL   | <a href="#">neuron morphogenesis during differentiation</a>   | <a href="#">RT</a> |  | 5     | 5.4E-1  | 1.0E0     |
| <input type="checkbox"/> | GOTERM_BP_ALL   | <a href="#">neurite morphogenesis</a>                         | <a href="#">RT</a> |  | 5     | 5.4E-1  | 1.0E0     |
| <input type="checkbox"/> | GOTERM_BP_ALL   | <a href="#">generation of neurons</a>                         | <a href="#">RT</a> |  | 8     | 6.2E-1  | 1.0E0     |
| <input type="checkbox"/> | GOTERM_BP_ALL   | <a href="#">cellular morphogenesis during differentiation</a> | <a href="#">RT</a> |  | 5     | 6.5E-1  | 1.0E0     |
| <input type="checkbox"/> | GOTERM_BP_ALL   | <a href="#">neuron differentiation</a>                        | <a href="#">RT</a> |  | 7     | 6.5E-1  | 1.0E0     |
| <input type="checkbox"/> | GOTERM_BP_ALL   | <a href="#">regulation of cell growth</a>                     | <a href="#">RT</a> |  | 3     | 6.7E-1  | 1.0E0     |
| <input type="checkbox"/> | GOTERM_BP_ALL   | <a href="#">neurite development</a>                           | <a href="#">RT</a> |  | 5     | 6.8E-1  | 1.0E0     |
| <input type="checkbox"/> | GOTERM_BP_ALL   | <a href="#">neurogenesis</a>                                  | <a href="#">RT</a> |  | 8     | 7.0E-1  | 1.0E0     |
| <input type="checkbox"/> | GOTERM_BP_ALL   | <a href="#">cell part morphogenesis</a>                       | <a href="#">RT</a> |  | 6     | 7.6E-1  | 1.0E0     |
| <input type="checkbox"/> | GOTERM_BP_ALL   | <a href="#">cell projection morphogenesis</a>                 | <a href="#">RT</a> |  | 6     | 7.6E-1  | 1.0E0     |
| <input type="checkbox"/> | GOTERM_BP_ALL   | <a href="#">cell projection organization and biogenesis</a>   | <a href="#">RT</a> |  | 6     | 7.6E-1  | 1.0E0     |
| <input type="checkbox"/> | GOTERM_BP_ALL   | <a href="#">neuron development</a>                            | <a href="#">RT</a> |  | 5     | 7.7E-1  | 1.0E0     |
| Annotation Cluster 73    |                 | Enrichment Score: 0.44                                        | <b>G</b>           |  | Count | P_Value | Benjamini |
| <input type="checkbox"/> | GOTERM_MF_ALL   | <a href="#">phosphoinositide binding</a>                      | <a href="#">RT</a> |  | 8     | 9.6E-2  | 1.0E0     |
| <input type="checkbox"/> | SP_PIR_KEYWORDS | <a href="#">gpi-anchor</a>                                    | <a href="#">RT</a> |  | 3     | 6.9E-1  | 1.0E0     |
| <input type="checkbox"/> | GOTERM_MF_ALL   | <a href="#">GPI anchor binding</a>                            | <a href="#">RT</a> |  | 3     | 7.3E-1  | 1.0E0     |
| Annotation Cluster 74    |                 | Enrichment Score: 0.43                                        | <b>G</b>           |  | Count | P_Value | Benjamini |
| <input type="checkbox"/> | UP_SEQ_FEATURE  | domain:SAM                                                    | <a href="#">RT</a> |  | 3     | 2.1E-1  | 1.0E0     |
| <input type="checkbox"/> | INTERPRO        | <a href="#">Sterile alpha motif SAM</a>                       | <a href="#">RT</a> |  | 3     | 4.8E-1  | 1.0E0     |
| <input type="checkbox"/> | SMART           | <a href="#">SAM</a>                                           | <a href="#">RT</a> |  | 3     | 5.1E-1  | 1.0E0     |
| Annotation Cluster 75    |                 | Enrichment Score: 0.37                                        | <b>G</b>           |  | Count | P_Value | Benjamini |
| <input type="checkbox"/> | GOTERM_BP_ALL   | <a href="#">sensory organ development</a>                     | <a href="#">RT</a> |  | 6     | 3.6E-1  | 1.0E0     |
| <input type="checkbox"/> | GOTERM_BP_ALL   | <a href="#">inner ear development</a>                         | <a href="#">RT</a> |  | 3     | 4.3E-1  | 1.0E0     |
| <input type="checkbox"/> | GOTERM_BP_ALL   | <a href="#">ear development</a>                               | <a href="#">RT</a> |  | 3     | 4.8E-1  | 1.0E0     |
| Annotation Cluster 76    |                 | Enrichment Score: 0.35                                        | <b>G</b>           |  | Count | P_Value | Benjamini |
| <input type="checkbox"/> | GOTERM_CC_ALL   | <a href="#">cytoplasmic vesicle</a>                           | <a href="#">RT</a> |  | 10    | 2.8E-1  | 1.0E0     |
| <input type="checkbox"/> | GOTERM_CC_ALL   | <a href="#">vesicle</a>                                       | <a href="#">RT</a> |  | 10    | 3.1E-1  | 1.0E0     |
| <input type="checkbox"/> | GOTERM_CC_ALL   | <a href="#">cytoplasmic membrane-bound vesicle</a>            | <a href="#">RT</a> |  | 7     | 4.0E-1  | 1.0E0     |
| <input type="checkbox"/> | GOTERM_CC_ALL   | <a href="#">membrane-bound vesicle</a>                        | <a href="#">RT</a> |  | 7     | 4.4E-1  | 1.0E0     |
| <input type="checkbox"/> | SP_PIR_KEYWORDS | <a href="#">cytoplasmic vesicle</a>                           | <a href="#">RT</a> |  | 4     | 5.4E-1  | 1.0E0     |
| <input type="checkbox"/> | GOTERM_CC_ALL   | <a href="#">clathrin-coated vesicle</a>                       | <a href="#">RT</a> |  | 3     | 6.5E-1  | 1.0E0     |
| <input type="checkbox"/> | GOTERM_CC_ALL   | <a href="#">coated vesicle</a>                                | <a href="#">RT</a> |  | 3     | 7.3E-1  | 1.0E0     |
| Annotation Cluster 77    |                 | Enrichment Score: 0.34                                        | <b>G</b>           |  | Count | P_Value | Benjamini |
| <input type="checkbox"/> | INTERPRO        | <a href="#">Immunoglobulin V-set</a>                          | <a href="#">RT</a> |  | 7     | 1.5E-1  | 1.0E0     |
| <input type="checkbox"/> | INTERPRO        | <a href="#">Immunoglobulin subtype 2</a>                      | <a href="#">RT</a> |  | 6     | 2.7E-1  | 1.0E0     |
| <input type="checkbox"/> | SMART           | <a href="#">IGc2</a>                                          | <a href="#">RT</a> |  | 6     | 3.4E-1  | 1.0E0     |
| <input type="checkbox"/> | SP_PIR_KEYWORDS | <a href="#">immunoglobulin domain</a>                         | <a href="#">RT</a> |  | 9     | 4.9E-1  | 1.0E0     |
| <input type="checkbox"/> | INTERPRO        | <a href="#">Immunoglobulin</a>                                | <a href="#">RT</a> |  | 5     | 4.9E-1  | 1.0E0     |
| <input type="checkbox"/> | INTERPRO        | <a href="#">Immunoglobulin-like fold</a>                      | <a href="#">RT</a> |  | 9     | 6.1E-1  | 1.0E0     |
| <input type="checkbox"/> | INTERPRO        | <a href="#">Immunoglobulin-like</a>                           | <a href="#">RT</a> |  | 8     | 6.7E-1  | 1.0E0     |
| <input type="checkbox"/> | INTERPRO        | <a href="#">Immunoglobulin subtype</a>                        | <a href="#">RT</a> |  | 5     | 7.3E-1  | 1.0E0     |
| <input type="checkbox"/> | SMART           | <a href="#">IG</a>                                            | <a href="#">RT</a> |  | 5     | 8.2E-1  | 1.0E0     |
| Annotation Cluster 78    |                 | Enrichment Score: 0.33                                        | <b>G</b>           |  | Count | P_Value | Benjamini |
| <input type="checkbox"/> | GOTERM_CC_ALL   | <a href="#">integral to organelle membrane</a>                | <a href="#">RT</a> |  | 4     | 2.2E-1  | 1.0E0     |
| <input type="checkbox"/> | GOTERM_CC_ALL   | <a href="#">intrinsic to organelle membrane</a>               | <a href="#">RT</a> |  | 4     | 2.7E-1  | 1.0E0     |
| <input type="checkbox"/> | GOTERM_CC_ALL   | <a href="#">endomembrane system</a>                           | <a href="#">RT</a> |  | 7     | 8.4E-1  | 1.0E0     |
| <input type="checkbox"/> | GOTERM_CC_ALL   | <a href="#">organelle membrane</a>                            | <a href="#">RT</a> |  | 8     | 9.8E-1  | 1.0E0     |
| Annotation Cluster 79    |                 | Enrichment Score: 0.32                                        | <b>G</b>           |  | Count | P_Value | Benjamini |
| <input type="checkbox"/> | INTERPRO        | <a href="#">Variant SH3</a>                                   | <a href="#">RT</a> |  | 3     | 3.2E-1  | 1.0E0     |

| <input type="checkbox"/> |                       |                                                                       |                    |  |  |       |         |           |  |
|--------------------------|-----------------------|-----------------------------------------------------------------------|--------------------|--|--|-------|---------|-----------|--|
| <input type="checkbox"/> | SP_PIR_KEYWORDS       | <a href="#">SH3 domain</a>                                            | <a href="#">RT</a> |  |  | 6     | 3.9E-1  | 1.0E0     |  |
| <input type="checkbox"/> | SMART                 | <a href="#">SH3</a>                                                   | <a href="#">RT</a> |  |  | 6     | 4.4E-1  | 1.0E0     |  |
| <input type="checkbox"/> | INTERPRO              | <a href="#">Src homology-3</a>                                        | <a href="#">RT</a> |  |  | 5     | 5.8E-1  | 1.0E0     |  |
| <input type="checkbox"/> | UP_SEQ_FEATURE        | domain:SH3                                                            | <a href="#">RT</a> |  |  | 3     | 7.5E-1  | 1.0E0     |  |
|                          | Annotation Cluster 80 | Enrichment Score: 0.32                                                | <b>G</b>           |  |  | Count | P_Value | Benjamini |  |
| <input type="checkbox"/> | GOTERM_BP_ALL         | <a href="#">embryonic limb morphogenesis</a>                          | <a href="#">RT</a> |  |  | 3     | 4.3E-1  | 1.0E0     |  |
| <input type="checkbox"/> | GOTERM_BP_ALL         | <a href="#">embryonic appendage morphogenesis</a>                     | <a href="#">RT</a> |  |  | 3     | 4.3E-1  | 1.0E0     |  |
| <input type="checkbox"/> | GOTERM_BP_ALL         | <a href="#">appendage morphogenesis</a>                               | <a href="#">RT</a> |  |  | 3     | 4.7E-1  | 1.0E0     |  |
| <input type="checkbox"/> | GOTERM_BP_ALL         | <a href="#">limb morphogenesis</a>                                    | <a href="#">RT</a> |  |  | 3     | 4.7E-1  | 1.0E0     |  |
| <input type="checkbox"/> | GOTERM_BP_ALL         | <a href="#">appendage development</a>                                 | <a href="#">RT</a> |  |  | 3     | 4.8E-1  | 1.0E0     |  |
| <input type="checkbox"/> | GOTERM_BP_ALL         | <a href="#">limb development</a>                                      | <a href="#">RT</a> |  |  | 3     | 4.8E-1  | 1.0E0     |  |
| <input type="checkbox"/> | GOTERM_BP_ALL         | <a href="#">embryonic morphogenesis</a>                               | <a href="#">RT</a> |  |  | 5     | 6.0E-1  | 1.0E0     |  |
|                          | Annotation Cluster 81 | Enrichment Score: 0.31                                                | <b>G</b>           |  |  | Count | P_Value | Benjamini |  |
| <input type="checkbox"/> | GOTERM_CC_ALL         | <a href="#">cytoplasm</a>                                             | <a href="#">RT</a> |  |  | 127   | 1.1E-1  | 1.0E0     |  |
| <input type="checkbox"/> | GOTERM_CC_ALL         | <a href="#">intracellular membrane-bound organelle</a>                | <a href="#">RT</a> |  |  | 139   | 3.1E-1  | 1.0E0     |  |
| <input type="checkbox"/> | GOTERM_CC_ALL         | <a href="#">membrane-bound organelle</a>                              | <a href="#">RT</a> |  |  | 139   | 3.1E-1  | 1.0E0     |  |
| <input type="checkbox"/> | GOTERM_CC_ALL         | <a href="#">intracellular</a>                                         | <a href="#">RT</a> |  |  | 191   | 4.8E-1  | 1.0E0     |  |
| <input type="checkbox"/> | GOTERM_CC_ALL         | <a href="#">intracellular part</a>                                    | <a href="#">RT</a> |  |  | 179   | 5.9E-1  | 1.0E0     |  |
| <input type="checkbox"/> | GOTERM_CC_ALL         | <a href="#">cytoplasmic part</a>                                      | <a href="#">RT</a> |  |  | 67    | 6.2E-1  | 1.0E0     |  |
| <input type="checkbox"/> | GOTERM_CC_ALL         | <a href="#">nucleus</a>                                               | <a href="#">RT</a> |  |  | 83    | 6.5E-1  | 1.0E0     |  |
| <input type="checkbox"/> | GOTERM_CC_ALL         | <a href="#">intracellular organelle</a>                               | <a href="#">RT</a> |  |  | 147   | 7.1E-1  | 1.0E0     |  |
| <input type="checkbox"/> | GOTERM_CC_ALL         | <a href="#">organelle</a>                                             | <a href="#">RT</a> |  |  | 147   | 7.1E-1  | 1.0E0     |  |
| <input type="checkbox"/> | GOTERM_CC_ALL         | <a href="#">cell part</a>                                             | <a href="#">RT</a> |  |  | 259   | 7.6E-1  | 1.0E0     |  |
| <input type="checkbox"/> | GOTERM_CC_ALL         | <a href="#">cell</a>                                                  | <a href="#">RT</a> |  |  | 259   | 7.6E-1  | 1.0E0     |  |
|                          | Annotation Cluster 82 | Enrichment Score: 0.31                                                | <b>G</b>           |  |  | Count | P_Value | Benjamini |  |
| <input type="checkbox"/> | GOTERM_MF_ALL         | <a href="#">endopeptidase activity</a>                                | <a href="#">RT</a> |  |  | 13    | 2.5E-1  | 1.0E0     |  |
| <input type="checkbox"/> | UP_SEQ_FEATURE        | active site:Charge relay system                                       | <a href="#">RT</a> |  |  | 5     | 3.0E-1  | 1.0E0     |  |
| <input type="checkbox"/> | SP_PIR_KEYWORDS       | <a href="#">serine protease</a>                                       | <a href="#">RT</a> |  |  | 5     | 3.4E-1  | 1.0E0     |  |
| <input type="checkbox"/> | GOTERM_MF_ALL         | <a href="#">serine hydrolase activity</a>                             | <a href="#">RT</a> |  |  | 6     | 4.8E-1  | 1.0E0     |  |
| <input type="checkbox"/> | GOTERM_MF_ALL         | <a href="#">serine-type peptidase activity</a>                        | <a href="#">RT</a> |  |  | 6     | 4.8E-1  | 1.0E0     |  |
| <input type="checkbox"/> | GOTERM_MF_ALL         | <a href="#">serine-type endopeptidase activity</a>                    | <a href="#">RT</a> |  |  | 5     | 6.1E-1  | 1.0E0     |  |
| <input type="checkbox"/> | INTERPRO              | <a href="#">Peptidase S1A, chymotrypsin</a>                           | <a href="#">RT</a> |  |  | 3     | 7.3E-1  | 1.0E0     |  |
| <input type="checkbox"/> | INTERPRO              | <a href="#">Peptidase S1 and S6, chymotrypsin/Hap</a>                 | <a href="#">RT</a> |  |  | 3     | 7.5E-1  | 1.0E0     |  |
| <input type="checkbox"/> | SMART                 | <a href="#">Tryp_SPC</a>                                              | <a href="#">RT</a> |  |  | 3     | 7.9E-1  | 1.0E0     |  |
|                          | Annotation Cluster 83 | Enrichment Score: 0.3                                                 | <b>G</b>           |  |  | Count | P_Value | Benjamini |  |
| <input type="checkbox"/> | GOTERM_BP_ALL         | <a href="#">membrane lipid biosynthetic process</a>                   | <a href="#">RT</a> |  |  | 4     | 2.6E-1  | 1.0E0     |  |
| <input type="checkbox"/> | GOTERM_BP_ALL         | <a href="#">phospholipid biosynthetic process</a>                     | <a href="#">RT</a> |  |  | 3     | 4.3E-1  | 1.0E0     |  |
| <input type="checkbox"/> | GOTERM_BP_ALL         | <a href="#">membrane lipid metabolic process</a>                      | <a href="#">RT</a> |  |  | 5     | 5.1E-1  | 1.0E0     |  |
| <input type="checkbox"/> | GOTERM_BP_ALL         | <a href="#">phospholipid metabolic process</a>                        | <a href="#">RT</a> |  |  | 4     | 5.7E-1  | 1.0E0     |  |
| <input type="checkbox"/> | GOTERM_BP_ALL         | <a href="#">lipid metabolic process</a>                               | <a href="#">RT</a> |  |  | 14    | 6.3E-1  | 1.0E0     |  |
| <input type="checkbox"/> | GOTERM_BP_ALL         | <a href="#">lipid biosynthetic process</a>                            | <a href="#">RT</a> |  |  | 6     | 6.4E-1  | 1.0E0     |  |
| <input type="checkbox"/> | GOTERM_BP_ALL         | <a href="#">cellular lipid metabolic process</a>                      | <a href="#">RT</a> |  |  | 12    | 6.5E-1  | 1.0E0     |  |
|                          | Annotation Cluster 84 | Enrichment Score: 0.27                                                | <b>G</b>           |  |  | Count | P_Value | Benjamini |  |
| <input type="checkbox"/> | GOTERM_BP_ALL         | <a href="#">tube morphogenesis</a>                                    | <a href="#">RT</a> |  |  | 6     | 2.3E-1  | 9.9E-1    |  |
| <input type="checkbox"/> | GOTERM_BP_ALL         | <a href="#">neural tube development</a>                               | <a href="#">RT</a> |  |  | 3     | 3.2E-1  | 1.0E0     |  |
| <input type="checkbox"/> | GOTERM_BP_ALL         | <a href="#">embryonic development ending in birth or egg hatching</a> | <a href="#">RT</a> |  |  | 6     | 5.2E-1  | 1.0E0     |  |
| <input type="checkbox"/> | GOTERM_BP_ALL         | <a href="#">chordate embryonic development</a>                        | <a href="#">RT</a> |  |  | 5     | 7.1E-1  | 1.0E0     |  |
| <input type="checkbox"/> | SP_PIR_KEYWORDS       | <a href="#">differentiation</a>                                       | <a href="#">RT</a> |  |  | 5     | 9.3E-1  | 1.0E0     |  |
| <input type="checkbox"/> | SP_PIR_KEYWORDS       | <a href="#">Developmental protein</a>                                 | <a href="#">RT</a> |  |  | 5     | 1.0E0   | 1.0E0     |  |
|                          | Annotation Cluster 85 | Enrichment Score: 0.22                                                | <b>G</b>           |  |  | Count | P_Value | Benjamini |  |

|                          |                 |                                                                      |                    |  |       |         |           |
|--------------------------|-----------------|----------------------------------------------------------------------|--------------------|--|-------|---------|-----------|
| <input type="checkbox"/> | UP_SEQ_FEATURE  | domain:EF-hand 1                                                     | <a href="#">RT</a> |  | 4     | 4.5E-1  | 1.0E0     |
| <input type="checkbox"/> | UP_SEQ_FEATURE  | domain:EF-hand 2                                                     | <a href="#">RT</a> |  | 4     | 4.5E-1  | 1.0E0     |
| <input type="checkbox"/> | INTERPRO        | <a href="#">Calcium-binding_EF-hand</a>                              | <a href="#">RT</a> |  | 4     | 7.7E-1  | 1.0E0     |
| <input type="checkbox"/> | SMART           | <a href="#">EFh</a>                                                  | <a href="#">RT</a> |  | 4     | 8.2E-1  | 1.0E0     |
| Annotation Cluster 86    |                 | Enrichment Score: 0.21                                               | <b>G</b>           |  | Count | P_Value | Benjamini |
| <input type="checkbox"/> | GOTERM_MF_ALL   | <a href="#">peptide binding</a>                                      | <a href="#">RT</a> |  | 5     | 3.8E-1  | 1.0E0     |
| <input type="checkbox"/> | GOTERM_BP_ALL   | <a href="#">G-protein coupled receptor protein signaling pathway</a> | <a href="#">RT</a> |  | 16    | 4.1E-1  | 1.0E0     |
| <input type="checkbox"/> | GOTERM_MF_ALL   | <a href="#">peptide receptor activity</a>                            | <a href="#">RT</a> |  | 4     | 4.6E-1  | 1.0E0     |
| <input type="checkbox"/> | GOTERM_MF_ALL   | <a href="#">transmembrane receptor activity</a>                      | <a href="#">RT</a> |  | 19    | 4.7E-1  | 1.0E0     |
| <input type="checkbox"/> | GOTERM_BP_ALL   | <a href="#">neuropeptide signaling pathway</a>                       | <a href="#">RT</a> |  | 3     | 5.6E-1  | 1.0E0     |
| <input type="checkbox"/> | SP_PIR_KEYWORDS | <a href="#">transducer</a>                                           | <a href="#">RT</a> |  | 8     | 7.8E-1  | 1.0E0     |
| <input type="checkbox"/> | GOTERM_MF_ALL   | <a href="#">G-protein coupled receptor activity</a>                  | <a href="#">RT</a> |  | 9     | 7.8E-1  | 1.0E0     |
| <input type="checkbox"/> | SP_PIR_KEYWORDS | <a href="#">g-protein coupled receptor</a>                           | <a href="#">RT</a> |  | 7     | 8.0E-1  | 1.0E0     |
| <input type="checkbox"/> | GOTERM_MF_ALL   | <a href="#">rhodopsin-like receptor activity</a>                     | <a href="#">RT</a> |  | 7     | 8.2E-1  | 1.0E0     |
| <input type="checkbox"/> | INTERPRO        | <a href="#">Rhodopsin-like GPCR superfamily</a>                      | <a href="#">RT</a> |  | 3     | 9.8E-1  | 1.0E0     |
| Annotation Cluster 87    |                 | Enrichment Score: 0.2                                                | <b>G</b>           |  | Count | P_Value | Benjamini |
| <input type="checkbox"/> | GOTERM_BP_ALL   | <a href="#">coenzyme metabolic process</a>                           | <a href="#">RT</a> |  | 5     | 5.2E-1  | 1.0E0     |
| <input type="checkbox"/> | GOTERM_BP_ALL   | <a href="#">coenzyme biosynthetic process</a>                        | <a href="#">RT</a> |  | 3     | 6.3E-1  | 1.0E0     |
| <input type="checkbox"/> | GOTERM_BP_ALL   | <a href="#">cofactor metabolic process</a>                           | <a href="#">RT</a> |  | 5     | 7.0E-1  | 1.0E0     |
| <input type="checkbox"/> | GOTERM_BP_ALL   | <a href="#">cofactor biosynthetic process</a>                        | <a href="#">RT</a> |  | 3     | 7.1E-1  | 1.0E0     |
| Annotation Cluster 88    |                 | Enrichment Score: 0.19                                               | <b>G</b>           |  | Count | P_Value | Benjamini |
| <input type="checkbox"/> | UP_SEQ_FEATURE  | zinc finger region:C2H2-type 1                                       | <a href="#">RT</a> |  | 4     | 5.8E-1  | 1.0E0     |
| <input type="checkbox"/> | UP_SEQ_FEATURE  | zinc finger region:C2H2-type 2                                       | <a href="#">RT</a> |  | 4     | 5.8E-1  | 1.0E0     |
| <input type="checkbox"/> | UP_SEQ_FEATURE  | zinc finger region:C2H2-type 3                                       | <a href="#">RT</a> |  | 3     | 7.9E-1  | 1.0E0     |
| Annotation Cluster 89    |                 | Enrichment Score: 0.17                                               | <b>G</b>           |  | Count | P_Value | Benjamini |
| <input type="checkbox"/> | INTERPRO        | <a href="#">Tetratricopeptide region</a>                             | <a href="#">RT</a> |  | 3     | 6.4E-1  | 1.0E0     |
| <input type="checkbox"/> | SMART           | <a href="#">TPR</a>                                                  | <a href="#">RT</a> |  | 3     | 6.8E-1  | 1.0E0     |
| <input type="checkbox"/> | INTERPRO        | <a href="#">Tetratricopeptide-like helical</a>                       | <a href="#">RT</a> |  | 3     | 7.0E-1  | 1.0E0     |
| Annotation Cluster 90    |                 | Enrichment Score: 0.17                                               | <b>G</b>           |  | Count | P_Value | Benjamini |
| <input type="checkbox"/> | SP_PIR_KEYWORDS | <a href="#">Palmitate</a>                                            | <a href="#">RT</a> |  | 5     | 5.8E-1  | 1.0E0     |
| <input type="checkbox"/> | UP_SEQ_FEATURE  | lipid moiety-binding region:S-palmitoyl cysteine                     | <a href="#">RT</a> |  | 4     | 6.4E-1  | 1.0E0     |
| <input type="checkbox"/> | KEGG_PATHWAY    | <a href="#">Neuroactive ligand-receptor interaction</a>              | <a href="#">RT</a> |  | 6     | 7.6E-1  | 1.0E0     |
| <input type="checkbox"/> | SP_PIR_KEYWORDS | <a href="#">lipoprotein</a>                                          | <a href="#">RT</a> |  | 11    | 7.6E-1  | 1.0E0     |
| Annotation Cluster 91    |                 | Enrichment Score: 0.16                                               | <b>G</b>           |  | Count | P_Value | Benjamini |
| <input type="checkbox"/> | GOTERM_BP_ALL   | <a href="#">protein complex assembly</a>                             | <a href="#">RT</a> |  | 5     | 5.0E-1  | 1.0E0     |
| <input type="checkbox"/> | GOTERM_BP_ALL   | <a href="#">macromolecular complex assembly</a>                      | <a href="#">RT</a> |  | 7     | 7.7E-1  | 1.0E0     |
| <input type="checkbox"/> | GOTERM_BP_ALL   | <a href="#">cellular component assembly</a>                          | <a href="#">RT</a> |  | 7     | 8.8E-1  | 1.0E0     |
| Annotation Cluster 92    |                 | Enrichment Score: 0.16                                               | <b>G</b>           |  | Count | P_Value | Benjamini |
| <input type="checkbox"/> | SP_PIR_KEYWORDS | <a href="#">sh2 domain</a>                                           | <a href="#">RT</a> |  | 3     | 6.9E-1  | 1.0E0     |
| <input type="checkbox"/> | INTERPRO        | <a href="#">SH2_motif</a>                                            | <a href="#">RT</a> |  | 3     | 6.9E-1  | 1.0E0     |
| <input type="checkbox"/> | SMART           | <a href="#">SH2</a>                                                  | <a href="#">RT</a> |  | 3     | 7.2E-1  | 1.0E0     |
| Annotation Cluster 93    |                 | Enrichment Score: 0.14                                               | <b>G</b>           |  | Count | P_Value | Benjamini |
| <input type="checkbox"/> | GOTERM_MF_ALL   | <a href="#">ligase activity</a>                                      | <a href="#">RT</a> |  | 9     | 5.0E-1  | 1.0E0     |
| <input type="checkbox"/> | GOTERM_MF_ALL   | <a href="#">ubiquitin-protein ligase activity</a>                    | <a href="#">RT</a> |  | 3     | 7.6E-1  | 1.0E0     |
| <input type="checkbox"/> | GOTERM_MF_ALL   | <a href="#">ligase activity, forming carbon-nitrogen bonds</a>       | <a href="#">RT</a> |  | 4     | 7.6E-1  | 1.0E0     |
| <input type="checkbox"/> | GOTERM_MF_ALL   | <a href="#">small protein conjugating enzyme activity</a>            | <a href="#">RT</a> |  | 3     | 7.7E-1  | 1.0E0     |
| <input type="checkbox"/> | GOTERM_MF_ALL   | <a href="#">small conjugating protein ligase activity</a>            | <a href="#">RT</a> |  | 3     | 7.8E-1  | 1.0E0     |
| <input type="checkbox"/> | GOTERM_MF_ALL   | <a href="#">acid-amino acid ligase activity</a>                      | <a href="#">RT</a> |  | 3     | 8.3E-1  | 1.0E0     |
| Annotation Cluster 94    |                 | Enrichment Score: 0.13                                               | <b>G</b>           |  | Count | P_Value | Benjamini |

| <input type="checkbox"/> |                       |                                                                       |                        |  |          |  |    |        |         |           |
|--------------------------|-----------------------|-----------------------------------------------------------------------|------------------------|--|----------|--|----|--------|---------|-----------|
| <input type="checkbox"/> | GOTERM_BP_ALL         | <a href="#">chemical homeostasis</a>                                  | <a href="#">RT</a>     |  |          |  | 7  | 4.1E-1 | 1.0E0   |           |
| <input type="checkbox"/> | GOTERM_BP_ALL         | <a href="#">ion homeostasis</a>                                       | <a href="#">RT</a>     |  |          |  | 4  | 8.0E-1 | 1.0E0   |           |
| <input type="checkbox"/> | GOTERM_BP_ALL         | <a href="#">cellular homeostasis</a>                                  | <a href="#">RT</a>     |  |          |  | 5  | 8.0E-1 | 1.0E0   |           |
| <input type="checkbox"/> | GOTERM_BP_ALL         | <a href="#">cellular chemical homeostasis</a>                         | <a href="#">RT</a>     |  |          |  | 3  | 9.0E-1 | 1.0E0   |           |
| <input type="checkbox"/> | GOTERM_BP_ALL         | <a href="#">cellular ion homeostasis</a>                              | <a href="#">RT</a>     |  |          |  | 3  | 9.0E-1 | 1.0E0   |           |
|                          | Annotation Cluster 95 |                                                                       | Enrichment Score: 0.12 |  | <b>G</b> |  |    | Count  | P_Value | Benjamini |
| <input type="checkbox"/> | SP_PIR_KEYWORDS       | <a href="#">heme</a>                                                  | <a href="#">RT</a>     |  |          |  | 4  | 4.9E-1 | 1.0E0   |           |
| <input type="checkbox"/> | UP_SEQ_FEATURE        | metal ion-binding site:Iron (heme axial ligand)                       | <a href="#">RT</a>     |  |          |  | 3  | 5.1E-1 | 1.0E0   |           |
| <input type="checkbox"/> | SP_PIR_KEYWORDS       | <a href="#">iron</a>                                                  | <a href="#">RT</a>     |  |          |  | 6  | 6.4E-1 | 1.0E0   |           |
| <input type="checkbox"/> | GOTERM_MF_ALL         | <a href="#">oxidoreductase activity</a>                               | <a href="#">RT</a>     |  |          |  | 16 | 8.4E-1 | 1.0E0   |           |
| <input type="checkbox"/> | GOTERM_MF_ALL         | <a href="#">heme binding</a>                                          | <a href="#">RT</a>     |  |          |  | 3  | 8.8E-1 | 1.0E0   |           |
| <input type="checkbox"/> | GOTERM_MF_ALL         | <a href="#">tetrapyrrole binding</a>                                  | <a href="#">RT</a>     |  |          |  | 3  | 8.8E-1 | 1.0E0   |           |
| <input type="checkbox"/> | GOTERM_BP_ALL         | <a href="#">electron transport</a>                                    | <a href="#">RT</a>     |  |          |  | 7  | 8.8E-1 | 1.0E0   |           |
| <input type="checkbox"/> | SP_PIR_KEYWORDS       | <a href="#">oxidoreductase</a>                                        | <a href="#">RT</a>     |  |          |  | 8  | 9.3E-1 | 1.0E0   |           |
| <input type="checkbox"/> | GOTERM_BP_ALL         | <a href="#">generation of precursor metabolites and energy</a>        | <a href="#">RT</a>     |  |          |  | 8  | 9.4E-1 | 1.0E0   |           |
|                          | Annotation Cluster 96 |                                                                       | Enrichment Score: 0.12 |  | <b>G</b> |  |    | Count  | P_Value | Benjamini |
| <input type="checkbox"/> | INTERPRO              | <a href="#">Nucleotide-binding, alpha-beta plait</a>                  | <a href="#">RT</a>     |  |          |  | 4  | 6.8E-1 | 1.0E0   |           |
| <input type="checkbox"/> | INTERPRO              | <a href="#">RNA recognition motif, RNP-1</a>                          | <a href="#">RT</a>     |  |          |  | 4  | 6.8E-1 | 1.0E0   |           |
| <input type="checkbox"/> | SP_PIR_KEYWORDS       | <a href="#">rna-binding</a>                                           | <a href="#">RT</a>     |  |          |  | 8  | 7.2E-1 | 1.0E0   |           |
| <input type="checkbox"/> | SMART                 | <a href="#">RRM</a>                                                   | <a href="#">RT</a>     |  |          |  | 4  | 7.9E-1 | 1.0E0   |           |
| <input type="checkbox"/> | GOTERM_MF_ALL         | <a href="#">RNA binding</a>                                           | <a href="#">RT</a>     |  |          |  | 8  | 9.8E-1 | 1.0E0   |           |
|                          | Annotation Cluster 97 |                                                                       | Enrichment Score: 0.11 |  | <b>G</b> |  |    | Count  | P_Value | Benjamini |
| <input type="checkbox"/> | GOTERM_BP_ALL         | <a href="#">regulation of protein metabolic process</a>               | <a href="#">RT</a>     |  |          |  | 8  | 4.1E-1 | 1.0E0   |           |
| <input type="checkbox"/> | GOTERM_BP_ALL         | <a href="#">regulation of translation</a>                             | <a href="#">RT</a>     |  |          |  | 3  | 8.5E-1 | 1.0E0   |           |
| <input type="checkbox"/> | GOTERM_BP_ALL         | <a href="#">regulation of cellular biosynthetic process</a>           | <a href="#">RT</a>     |  |          |  | 3  | 8.7E-1 | 1.0E0   |           |
| <input type="checkbox"/> | GOTERM_BP_ALL         | <a href="#">regulation of biosynthetic process</a>                    | <a href="#">RT</a>     |  |          |  | 3  | 9.1E-1 | 1.0E0   |           |
| <input type="checkbox"/> | GOTERM_BP_ALL         | <a href="#">translation</a>                                           | <a href="#">RT</a>     |  |          |  | 6  | 9.7E-1 | 1.0E0   |           |
|                          | Annotation Cluster 98 |                                                                       | Enrichment Score: 0.07 |  | <b>G</b> |  |    | Count  | P_Value | Benjamini |
| <input type="checkbox"/> | GOTERM_BP_ALL         | <a href="#">transition metal ion transport</a>                        | <a href="#">RT</a>     |  |          |  | 3  | 3.6E-1 | 1.0E0   |           |
| <input type="checkbox"/> | GOTERM_BP_ALL         | <a href="#">di-, tri-valent inorganic cation transport</a>            | <a href="#">RT</a>     |  |          |  | 4  | 6.1E-1 | 1.0E0   |           |
| <input type="checkbox"/> | GOTERM_MF_ALL         | <a href="#">inorganic cation transmembrane transporter activity</a>   | <a href="#">RT</a>     |  |          |  | 4  | 6.3E-1 | 1.0E0   |           |
| <input type="checkbox"/> | GOTERM_BP_ALL         | <a href="#">cation transport</a>                                      | <a href="#">RT</a>     |  |          |  | 9  | 8.4E-1 | 1.0E0   |           |
| <input type="checkbox"/> | SP_PIR_KEYWORDS       | <a href="#">ion transport</a>                                         | <a href="#">RT</a>     |  |          |  | 8  | 8.4E-1 | 1.0E0   |           |
| <input type="checkbox"/> | GOTERM_MF_ALL         | <a href="#">substrate-specific transporter activity</a>               | <a href="#">RT</a>     |  |          |  | 17 | 8.8E-1 | 1.0E0   |           |
| <input type="checkbox"/> | GOTERM_BP_ALL         | <a href="#">metal ion transport</a>                                   | <a href="#">RT</a>     |  |          |  | 6  | 9.4E-1 | 1.0E0   |           |
| <input type="checkbox"/> | GOTERM_MF_ALL         | <a href="#">metal ion transmembrane transporter activity</a>          | <a href="#">RT</a>     |  |          |  | 4  | 9.5E-1 | 1.0E0   |           |
| <input type="checkbox"/> | GOTERM_BP_ALL         | <a href="#">localization</a>                                          | <a href="#">RT</a>     |  |          |  | 53 | 9.5E-1 | 1.0E0   |           |
| <input type="checkbox"/> | GOTERM_BP_ALL         | <a href="#">ion transport</a>                                         | <a href="#">RT</a>     |  |          |  | 11 | 9.6E-1 | 1.0E0   |           |
| <input type="checkbox"/> | GOTERM_MF_ALL         | <a href="#">transporter activity</a>                                  | <a href="#">RT</a>     |  |          |  | 21 | 9.6E-1 | 1.0E0   |           |
| <input type="checkbox"/> | SP_PIR_KEYWORDS       | <a href="#">transport</a>                                             | <a href="#">RT</a>     |  |          |  | 20 | 9.7E-1 | 1.0E0   |           |
| <input type="checkbox"/> | GOTERM_MF_ALL         | <a href="#">cation transmembrane transporter activity</a>             | <a href="#">RT</a>     |  |          |  | 6  | 9.8E-1 | 1.0E0   |           |
| <input type="checkbox"/> | GOTERM_BP_ALL         | <a href="#">transport</a>                                             | <a href="#">RT</a>     |  |          |  | 42 | 9.8E-1 | 1.0E0   |           |
| <input type="checkbox"/> | GOTERM_MF_ALL         | <a href="#">substrate-specific transmembrane transporter activity</a> | <a href="#">RT</a>     |  |          |  | 10 | 9.8E-1 | 1.0E0   |           |
| <input type="checkbox"/> | GOTERM_MF_ALL         | <a href="#">ion transmembrane transporter activity</a>                | <a href="#">RT</a>     |  |          |  | 8  | 9.9E-1 | 1.0E0   |           |
| <input type="checkbox"/> | GOTERM_BP_ALL         | <a href="#">establishment of localization</a>                         | <a href="#">RT</a>     |  |          |  | 42 | 9.9E-1 | 1.0E0   |           |
| <input type="checkbox"/> | GOTERM_MF_ALL         | <a href="#">transmembrane transporter activity</a>                    | <a href="#">RT</a>     |  |          |  | 11 | 9.9E-1 | 1.0E0   |           |
|                          | Annotation Cluster 99 |                                                                       | Enrichment Score: 0.06 |  | <b>G</b> |  |    | Count  | P_Value | Benjamini |
| <input type="checkbox"/> | GOTERM_BP_ALL         | <a href="#">macromolecule biosynthetic process</a>                    | <a href="#">RT</a>     |  |          |  | 14 | 7.5E-1 | 1.0E0   |           |

| <input type="checkbox"/> | Term            | Definition                                                                                                     | RT       | Bar | Count | P_Value | Benjamini |
|--------------------------|-----------------|----------------------------------------------------------------------------------------------------------------|----------|-----|-------|---------|-----------|
| <input type="checkbox"/> | GOTERM_BP_ALL   | <a href="#">biosynthetic process</a>                                                                           | RT       |     | 25    | 7.7E-1  | 1.0E0     |
| <input type="checkbox"/> | GOTERM_BP_ALL   | <a href="#">translation</a>                                                                                    | RT       |     | 6     | 9.7E-1  | 1.0E0     |
| <input type="checkbox"/> | GOTERM_BP_ALL   | <a href="#">cellular biosynthetic process</a>                                                                  | RT       |     | 13    | 9.9E-1  | 1.0E0     |
| Annotation Cluster 100   |                 | Enrichment Score: 0.06                                                                                         | <b>G</b> |     | Count | P_Value | Benjamini |
| <input type="checkbox"/> | GOTERM_CC_ALL   | <a href="#">condensed chromosome</a>                                                                           | RT       |     | 3     | 3.3E-1  | 1.0E0     |
| <input type="checkbox"/> | GOTERM_CC_ALL   | <a href="#">chromosome</a>                                                                                     | RT       |     | 7     | 6.8E-1  | 1.0E0     |
| <input type="checkbox"/> | GOTERM_CC_ALL   | <a href="#">chromosomal part</a>                                                                               | RT       |     | 6     | 7.2E-1  | 1.0E0     |
| <input type="checkbox"/> | GOTERM_CC_ALL   | <a href="#">transcription factor complex</a>                                                                   | RT       |     | 7     | 9.1E-1  | 1.0E0     |
| <input type="checkbox"/> | GOTERM_CC_ALL   | <a href="#">nucleoplasm</a>                                                                                    | RT       |     | 9     | 9.5E-1  | 1.0E0     |
| <input type="checkbox"/> | GOTERM_CC_ALL   | <a href="#">nucleoplasm part</a>                                                                               | RT       |     | 8     | 9.6E-1  | 1.0E0     |
| <input type="checkbox"/> | GOTERM_CC_ALL   | <a href="#">nuclear lumen</a>                                                                                  | RT       |     | 10    | 9.8E-1  | 1.0E0     |
| <input type="checkbox"/> | GOTERM_CC_ALL   | <a href="#">organelle lumen</a>                                                                                | RT       |     | 11    | 9.9E-1  | 1.0E0     |
| <input type="checkbox"/> | GOTERM_CC_ALL   | <a href="#">membrane-enclosed lumen</a>                                                                        | RT       |     | 11    | 9.9E-1  | 1.0E0     |
| <input type="checkbox"/> | GOTERM_CC_ALL   | <a href="#">nuclear part</a>                                                                                   | RT       |     | 14    | 9.9E-1  | 1.0E0     |
| <input type="checkbox"/> | GOTERM_CC_ALL   | <a href="#">protein complex</a>                                                                                | RT       |     | 22    | 1.0E0   | 1.0E0     |
| <input type="checkbox"/> | GOTERM_CC_ALL   | <a href="#">intracellular organelle part</a>                                                                   | RT       |     | 31    | 1.0E0   | 1.0E0     |
| <input type="checkbox"/> | GOTERM_CC_ALL   | <a href="#">organelle part</a>                                                                                 | RT       |     | 31    | 1.0E0   | 1.0E0     |
| <input type="checkbox"/> | GOTERM_CC_ALL   | <a href="#">macromolecular complex</a>                                                                         | RT       |     | 24    | 1.0E0   | 1.0E0     |
| Annotation Cluster 101   |                 | Enrichment Score: 0.06                                                                                         | <b>G</b> |     | Count | P_Value | Benjamini |
| <input type="checkbox"/> | INTERPRO        | <a href="#">EGF-like</a>                                                                                       | RT       |     | 3     | 7.6E-1  | 1.0E0     |
| <input type="checkbox"/> | INTERPRO        | <a href="#">EGF-like region</a>                                                                                | RT       |     | 5     | 7.8E-1  | 1.0E0     |
| <input type="checkbox"/> | INTERPRO        | <a href="#">EGF-like, type 3</a>                                                                               | RT       |     | 3     | 9.0E-1  | 1.0E0     |
| <input type="checkbox"/> | INTERPRO        | <a href="#">EGF</a>                                                                                            | RT       |     | 3     | 9.1E-1  | 1.0E0     |
| <input type="checkbox"/> | SMART           | <a href="#">EGF</a>                                                                                            | RT       |     | 3     | 9.2E-1  | 1.0E0     |
| <input type="checkbox"/> | SP_PIR_KEYWORDS | <a href="#">egf-like domain</a>                                                                                | RT       |     | 3     | 9.3E-1  | 1.0E0     |
| Annotation Cluster 102   |                 | Enrichment Score: 0.06                                                                                         | <b>G</b> |     | Count | P_Value | Benjamini |
| <input type="checkbox"/> | INTERPRO        | <a href="#">Zinc finger, C2H2-like</a>                                                                         | RT       |     | 7     | 8.1E-1  | 1.0E0     |
| <input type="checkbox"/> | SMART           | <a href="#">ZnF_C2H2</a>                                                                                       | RT       |     | 7     | 8.9E-1  | 1.0E0     |
| <input type="checkbox"/> | INTERPRO        | <a href="#">Zinc finger, C2H2-type</a>                                                                         | RT       |     | 8     | 9.0E-1  | 1.0E0     |
| Annotation Cluster 103   |                 | Enrichment Score: 0.06                                                                                         | <b>G</b> |     | Count | P_Value | Benjamini |
| <input type="checkbox"/> | GOTERM_CC_ALL   | <a href="#">microsome</a>                                                                                      | RT       |     | 3     | 8.5E-1  | 1.0E0     |
| <input type="checkbox"/> | GOTERM_CC_ALL   | <a href="#">vesicular fraction</a>                                                                             | RT       |     | 3     | 8.7E-1  | 1.0E0     |
| <input type="checkbox"/> | GOTERM_CC_ALL   | <a href="#">membrane fraction</a>                                                                              | RT       |     | 8     | 8.9E-1  | 1.0E0     |
| Annotation Cluster 104   |                 | Enrichment Score: 0.06                                                                                         | <b>G</b> |     | Count | P_Value | Benjamini |
| <input type="checkbox"/> | SP_PIR_KEYWORDS | <a href="#">wd repeat</a>                                                                                      | RT       |     | 5     | 7.4E-1  | 1.0E0     |
| <input type="checkbox"/> | INTERPRO        | <a href="#">WD40 repeat</a>                                                                                    | RT       |     | 3     | 9.4E-1  | 1.0E0     |
| <input type="checkbox"/> | SMART           | <a href="#">WD40</a>                                                                                           | RT       |     | 3     | 9.6E-1  | 1.0E0     |
| Annotation Cluster 105   |                 | Enrichment Score: 0.05                                                                                         | <b>G</b> |     | Count | P_Value | Benjamini |
| <input type="checkbox"/> | GOTERM_BP_ALL   | <a href="#">sensory perception</a>                                                                             | RT       |     | 5     | 8.7E-1  | 1.0E0     |
| <input type="checkbox"/> | GOTERM_BP_ALL   | <a href="#">system process</a>                                                                                 | RT       |     | 12    | 8.9E-1  | 1.0E0     |
| <input type="checkbox"/> | GOTERM_BP_ALL   | <a href="#">neurological system process</a>                                                                    | RT       |     | 9     | 9.0E-1  | 1.0E0     |
| Annotation Cluster 106   |                 | Enrichment Score: 0.05                                                                                         | <b>G</b> |     | Count | P_Value | Benjamini |
| <input type="checkbox"/> | GOTERM_MF_ALL   | <a href="#">ATPase activity, coupled to transmembrane movement of substances</a>                               | RT       |     | 3     | 8.0E-1  | 1.0E0     |
| <input type="checkbox"/> | GOTERM_MF_ALL   | <a href="#">ATPase activity, coupled to movement of substances</a>                                             | RT       |     | 3     | 8.0E-1  | 1.0E0     |
| <input type="checkbox"/> | GOTERM_MF_ALL   | <a href="#">hydrolase activity, acting on acid anhydrides, catalyzing transmembrane movement of substances</a> | RT       |     | 3     | 8.1E-1  | 1.0E0     |
| <input type="checkbox"/> | GOTERM_MF_ALL   | <a href="#">primary active transmembrane transporter activity</a>                                              | RT       |     | 3     | 8.4E-1  | 1.0E0     |
| <input type="checkbox"/> | GOTERM_MF_ALL   | <a href="#">P-P-bond-hydrolysis-driven transmembrane transporter activity</a>                                  | RT       |     | 3     | 8.4E-1  | 1.0E0     |
| <input type="checkbox"/> | GOTERM_MF_ALL   | <a href="#">ATPase activity, coupled</a>                                                                       | RT       |     | 4     | 9.4E-1  | 1.0E0     |

|                          |                 |                                                                                                    |                    |          |   |        |       |
|--------------------------|-----------------|----------------------------------------------------------------------------------------------------|--------------------|----------|---|--------|-------|
| <input type="checkbox"/> | GOTERM_MF_ALL   | <a href="#">active transmembrane transporter activity</a>                                          | <a href="#">RT</a> |          | 5 | 9.5E-1 | 1.0E0 |
| <input type="checkbox"/> | GOTERM_MF_ALL   | <a href="#">pyrophosphatase activity</a>                                                           | <a href="#">RT</a> |          | 8 | 9.6E-1 | 1.0E0 |
| <input type="checkbox"/> | GOTERM_MF_ALL   | <a href="#">hydrolase activity, acting on acid anhydrides, in phosphorus-containing anhydrides</a> | <a href="#">RT</a> |          | 8 | 9.6E-1 | 1.0E0 |
| <input type="checkbox"/> | GOTERM_MF_ALL   | <a href="#">hydrolase activity, acting on acid anhydrides</a>                                      | <a href="#">RT</a> |          | 8 | 9.6E-1 | 1.0E0 |
| <input type="checkbox"/> | GOTERM_MF_ALL   | <a href="#">ATPase activity</a>                                                                    | <a href="#">RT</a> |          | 4 | 9.7E-1 | 1.0E0 |
| <input type="checkbox"/> | GOTERM_MF_ALL   | <a href="#">nucleoside-triphosphatase activity</a>                                                 | <a href="#">RT</a> |          | 7 | 9.7E-1 | 1.0E0 |
| Annotation Cluster 107   |                 | Enrichment Score: 0.03                                                                             |                    | <b>G</b> |   |        |       |
| <input type="checkbox"/> | GOTERM_BP_ALL   | <a href="#">neurological system process</a>                                                        | <a href="#">RT</a> |          | 9 | 9.0E-1 | 1.0E0 |
| <input type="checkbox"/> | GOTERM_BP_ALL   | <a href="#">transmission of nerve impulse</a>                                                      | <a href="#">RT</a> |          | 4 | 9.2E-1 | 1.0E0 |
| <input type="checkbox"/> | GOTERM_BP_ALL   | <a href="#">cell-cell signaling</a>                                                                | <a href="#">RT</a> |          | 5 | 9.6E-1 | 1.0E0 |
| Annotation Cluster 108   |                 | Enrichment Score: 0.03                                                                             |                    | <b>G</b> |   |        |       |
| <input type="checkbox"/> | INTERPRO        | <a href="#">Zinc finger, C2H2-type/integrase, DNA-binding</a>                                      | <a href="#">RT</a> |          | 5 | 8.9E-1 | 1.0E0 |
| <input type="checkbox"/> | INTERPRO        | <a href="#">KRAB box</a>                                                                           | <a href="#">RT</a> |          | 3 | 9.4E-1 | 1.0E0 |
| <input type="checkbox"/> | SMART           | <a href="#">KRAB</a>                                                                               | <a href="#">RT</a> |          | 3 | 9.6E-1 | 1.0E0 |
| Annotation Cluster 109   |                 | Enrichment Score: 0.01                                                                             |                    | <b>G</b> |   |        |       |
| <input type="checkbox"/> | SP_PIR_KEYWORDS | <a href="#">ion transport</a>                                                                      | <a href="#">RT</a> |          | 8 | 8.4E-1 | 1.0E0 |
| <input type="checkbox"/> | GOTERM_MF_ALL   | <a href="#">gated channel activity</a>                                                             | <a href="#">RT</a> |          | 3 | 9.8E-1 | 1.0E0 |
| <input type="checkbox"/> | SP_PIR_KEYWORDS | <a href="#">Ionic channel</a>                                                                      | <a href="#">RT</a> |          | 3 | 9.8E-1 | 1.0E0 |
| <input type="checkbox"/> | GOTERM_MF_ALL   | <a href="#">ion transmembrane transporter activity</a>                                             | <a href="#">RT</a> |          | 8 | 9.9E-1 | 1.0E0 |
| <input type="checkbox"/> | GOTERM_MF_ALL   | <a href="#">ion channel activity</a>                                                               | <a href="#">RT</a> |          | 3 | 9.9E-1 | 1.0E0 |
| <input type="checkbox"/> | GOTERM_MF_ALL   | <a href="#">substrate specific channel activity</a>                                                | <a href="#">RT</a> |          | 3 | 1.0E0  | 1.0E0 |
| <input type="checkbox"/> | GOTERM_MF_ALL   | <a href="#">passive transmembrane transporter activity</a>                                         | <a href="#">RT</a> |          | 3 | 1.0E0  | 1.0E0 |
| <input type="checkbox"/> | GOTERM_MF_ALL   | <a href="#">channel activity</a>                                                                   | <a href="#">RT</a> |          | 3 | 1.0E0  | 1.0E0 |
| Annotation Cluster 110   |                 | Enrichment Score: 0                                                                                |                    | <b>G</b> |   |        |       |
| <input type="checkbox"/> | GOTERM_CC_ALL   | <a href="#">mitochondrial envelope</a>                                                             | <a href="#">RT</a> |          | 3 | 9.9E-1 | 1.0E0 |
| <input type="checkbox"/> | GOTERM_CC_ALL   | <a href="#">organelle envelope</a>                                                                 | <a href="#">RT</a> |          | 4 | 9.9E-1 | 1.0E0 |
| <input type="checkbox"/> | GOTERM_CC_ALL   | <a href="#">envelope</a>                                                                           | <a href="#">RT</a> |          | 4 | 9.9E-1 | 1.0E0 |
| <input type="checkbox"/> | GOTERM_CC_ALL   | <a href="#">mitochondrial part</a>                                                                 | <a href="#">RT</a> |          | 3 | 1.0E0  | 1.0E0 |
| Annotation Cluster 111   |                 | Enrichment Score: 0                                                                                |                    | <b>G</b> |   |        |       |
| <input type="checkbox"/> | GOTERM_MF_ALL   | <a href="#">GTP binding</a>                                                                        | <a href="#">RT</a> |          | 3 | 9.9E-1 | 1.0E0 |
| <input type="checkbox"/> | GOTERM_MF_ALL   | <a href="#">guanyl ribonucleotide binding</a>                                                      | <a href="#">RT</a> |          | 3 | 1.0E0  | 1.0E0 |
| <input type="checkbox"/> | GOTERM_MF_ALL   | <a href="#">guanyl nucleotide binding</a>                                                          | <a href="#">RT</a> |          | 3 | 1.0E0  | 1.0E0 |

215 terms were not clustered.

Please cite the web site or [Genome Biology 2003; 4\(5\):P3](#) within any publication that makes use of any methods inspired by DAVID.

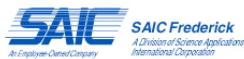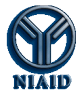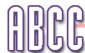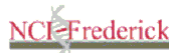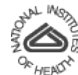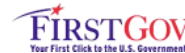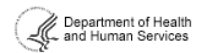

[Term of Service](#) | [Contact Us](#) | [Site Map](#)
